# Supplementary material for: A caveat of the charge-extrapolation scheme for modeling electrochemical reactions on semiconductor surfaces: an issue induced by a discontinuous Fermi level change
Source: Royal Society of Chemistry journal article supplement (doi:10.1039/d2cp00642a), 2022-01-01
Supplement: d2cp00642a1.pdf [file d2cp00642a1.pdf]

## Supporting Information

### A Caveat of the Charge-Extrapolation Scheme for Modeling Electrochemical Reactions on Semiconductor Surfaces: An Issue Induced by a Discontinuous Fermi Level Change

Yu Liu,<sup>1</sup> Xinlong Ding,<sup>2</sup> Mohan Chen,<sup>1</sup> and Shenzhen Xu<sup>\*,3</sup>

<sup>1</sup>HEDPS, Center for Applied Physics and Technology, College of Engineering and School of Physics, Peking University, Beijing 100871, People's Republic of China

<sup>2</sup>Department of Energy and Resources Engineering, Peking University, Beijing 100871, People's Republic of China

<sup>3</sup>School of Materials Science and Engineering, Peking University, Beijing 100871, People's Republic of China

#### S1. Atomic structures of the Pt and GaP large-surface supercells

We show the atomic structures of the  $2 \times 2$  Pt and the  $3 \times 3$  GaP large-surface supercells (defined in the Methods section of the main text) in Figure S3 and S4. We highlight the reaction unit for producing one  $H_2$  molecule by pink dashed boxes. We can see that there are 4 and 9 reaction units in the large supercells of Pt and GaP surfaces respectively. We note that only one reaction unit is involved in the reaction of one  $H_2$  molecule formation modeled by the large-surface supercells.

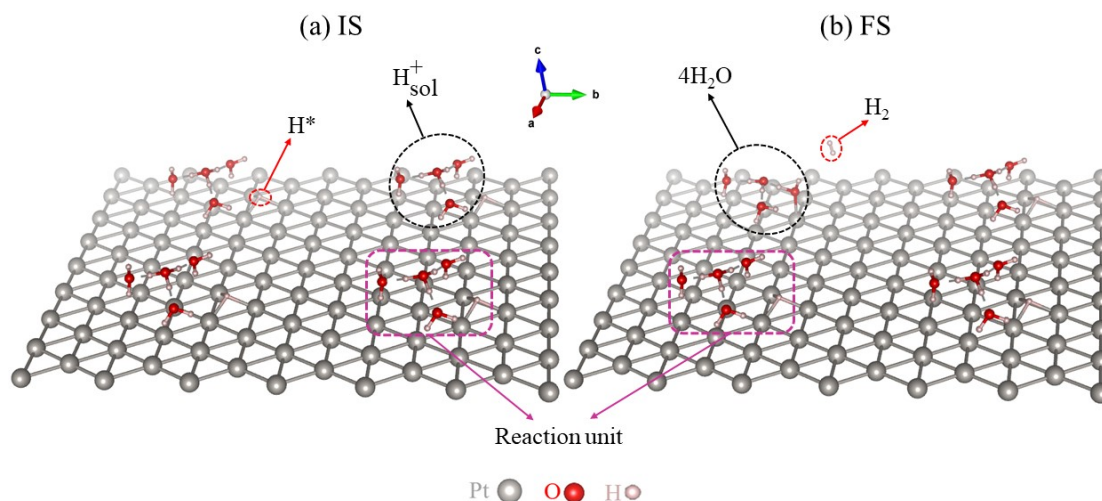

23 **Figure S1.** Schematic atomic structures of the  $2 \times 2$  Pt (111) surface supercells. (a) The IS with  
 24 one  $H^*$  atom and one  $[H_3O^+ - 3H_2O + e^-]_{\text{slab}}$  cluster per reaction unit (denoted as  $H^+_{\text{sol}}$ ) on the Pt  
 25 slab. (b) The FS with the products of one  $H_2$  molecule and  $4H_2O$  in one of the reaction units  
 26 on the Pt slab. There are 4 reaction units in the supercell, one of which is marked by the pink  
 27 dashed box. Only the top layer of the Pt slab is displayed here for simplicity.

28

29

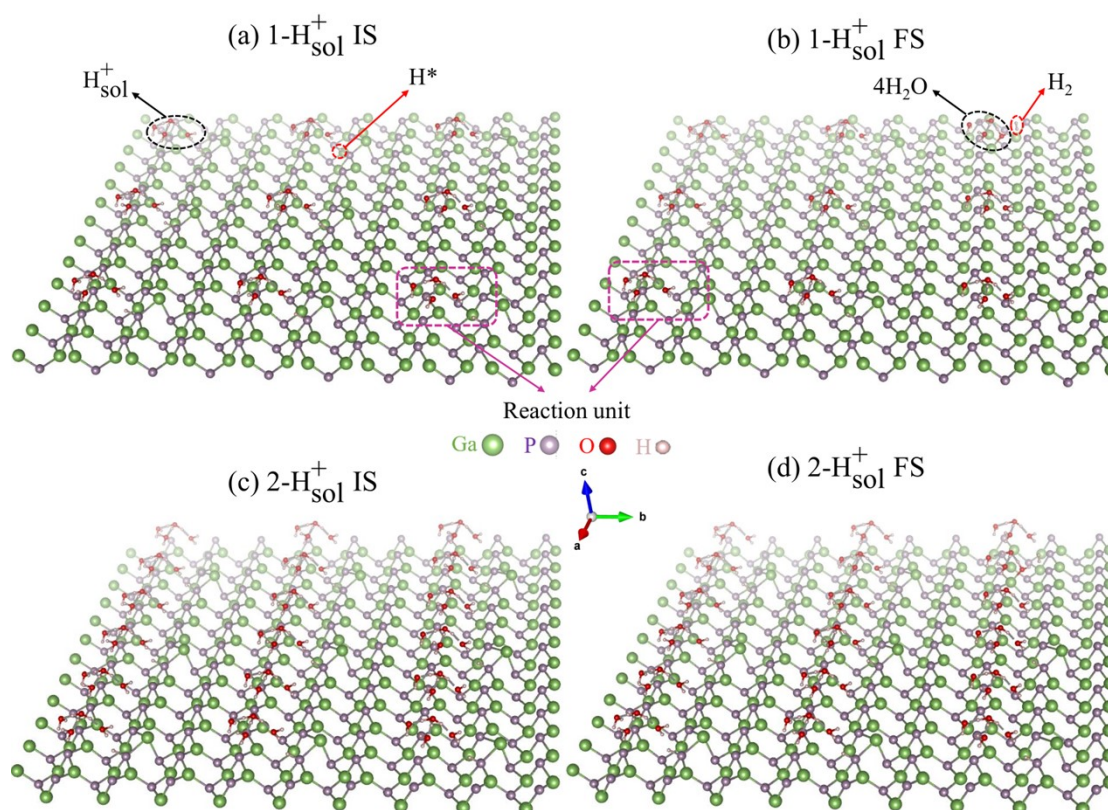

30

31 **Figure S2.** Schematic atomic structures of the  $3 \times 3$  GaP (110) surface supercells. (a) The IS  
 32 with one  $H^*$  atom and one  $H^+_{\text{sol}}$  cluster per reaction unit on the GaP slab, denoted as  $1-H^+_{\text{sol}}$ .  
 33 (b) The FS with the products of one  $H_2$  molecule and  $4H_2O$  in one of the reaction units on the  
 34 GaP slab for the  $1-H^+_{\text{sol}}$  case. (c)(d) The IS and FS of the  $H_2$  formation reaction on the GaP  
 35 (110) surface with two  $H^+_{\text{sol}}$  clusters per reaction unit, denoted as  $2-H^+_{\text{sol}}$ . There are 9 reaction  
 36 units in the supercell, one of which is marked by the pink dashed box. Only the top and the  
 37 subsurface layers of the GaP slab are displayed here for simplicity.

38

39

40 **S2. Hydrogen evolution reaction step  $H^+_{\text{sol}} + H^* + e^- \rightarrow H_2$  on the semiconductor**  
 41 **AIAs surface**

42 Considering the computational costs and the surface area of the slab in order to ensure

43 that two electron-donating species can be accommodated in the cell, we simulate the  
44 hydrogen evolution reaction step  $\text{H}_{\text{sol}}^+ + \text{H}^* + \text{e}^- \rightarrow \text{H}_2$  on the semiconductor AlAs  
45 surface. Specifically, we construct an AlAs slab with the (110) facet exposed. The  
46 supercell consists of five atomic layers (12 Al and 12 As atoms per layer) with the  
47 dimensions of  $16.228 \times 17.213 \times 30.388 \text{ \AA}^3$ . Each layer consists of 12 (3×4) primitive  
48 surface units, and the atoms of the third layer are fixed at the bulk positions of the  
49 zinc-blende-structure AlAs. Similarly, the issue of applying the charge-extrapolation  
50 scheme for semiconductor surface reactions with cross-bandgap Fermi level changes  
51 also exists in the additional semiconductor surface reaction simulation, which can be  
52 avoided by our solutions of adding an extra electron-donating species on the  
53 semiconductor surface.

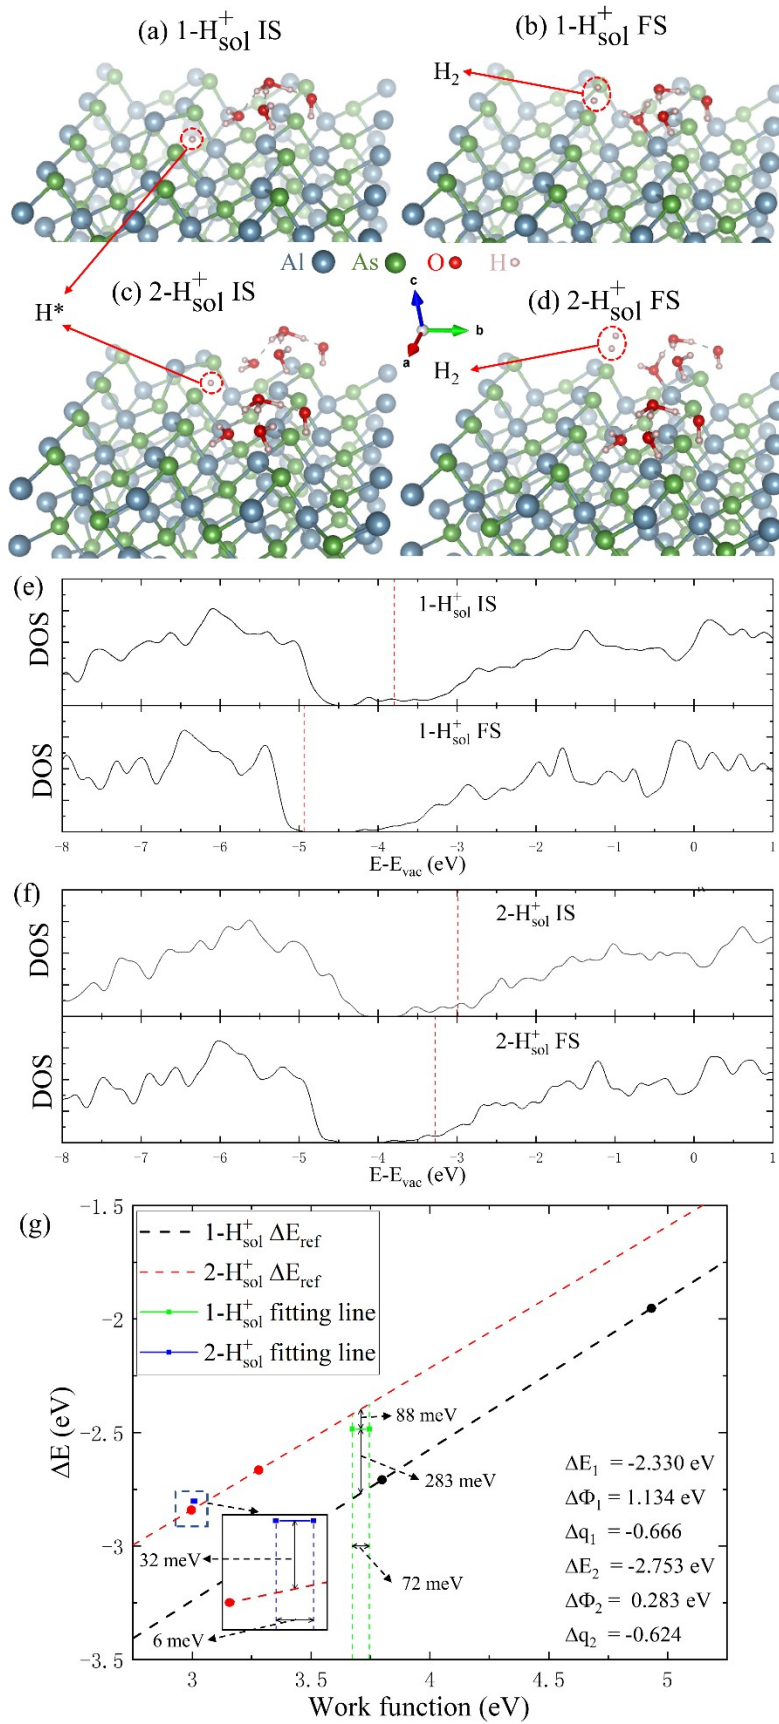

54 **Figure S3.** Schematic atomic structures of (a) the IS with one  $\text{H}^*$  atom and one  $\text{H}_{\text{sol}}^+$  cluster,  
 55 and (b) the FS with the products of  $\text{H}_2$  and  $4\text{H}_2\text{O}$  in the A1As (110)  $1\times 1$  small surface cell,

56 denoted as  $1\text{-H}_{\text{sol}}^+$ . (c)(d) The IS and FS of the reduction reaction on the AlAs (110) surface  
57 analogous to (a)(b), except for two  $\text{H}_{\text{sol}}^+$  clusters placed on the AlAs surface, denoted as 2-  
58  $\text{H}_{\text{sol}}^+$ . (e)(f) The IS and FS DOS with  $1\text{-H}_{\text{sol}}^+$  cluster and  $2\text{-H}_{\text{sol}}^+$  clusters on the surface  
59 computed by the  $1\times 1$  small supercells. (g)  $\Delta E_{\text{ref}}$  (the green/blue solid bar) and  $\Delta E_{\text{chg-ex}}$  (the  
60 black/red dashed line) of the surface reduction reactions with  $1\text{-H}_{\text{sol}}^+/2\text{-H}_{\text{sol}}^+$  clusters per  
61 reaction unit on the surface. Subscript  $i$  of  $\Delta E$ ,  $\Delta\Phi$ , and  $\Delta q$  stands for the  $i\text{-H}_{\text{sol}}^+$  system.
