# Supplementary material for: A caveat of the charge-extrapolation scheme for modeling electrochemical reactions on semiconductor surfaces: an issue induced by a discontinuous Fermi level change
Source: Royal Society of Chemistry journal article supplement (doi:10.1039/d2cp00642a), 2022-01-01
Supplement: d2cp00642a2.pdf [file d2cp00642a2.pdf]

## A. Hydrogen evolution reaction step $\text{H}^+_{\text{sol}} + \text{H}^* + \text{e}^- \rightarrow \text{H}_2$ on the metal Pt surface

### 1) Small supercell IS

POSCAR

2.80638615913204

4.000000000000000 0.000000000000000 0.000000000000000

0.000000000000000 5.19615242300000 0.000000000000000

0.000000000000000 0.000000000000000 9.97724418961000

Pt O H

96 8 20

Direct

0.999786140351 0.998521059389 1.001590330568 T T T

0.999722693289 0.331100951997 1.001670346561 T T T

0.999527293562 0.664175935770 1.001503812530 T T T

0.249506137272 0.999041482949 1.001622072181 T T T

0.250112028600 0.330563532719 1.001514369932 T T T

0.246191157505 0.662876959348 1.000407665605 T T T

0.500707527048 0.998983959791 1.001633539975 T T T

0.500866028212 0.330660287659 1.001234346913 T T T

0.504080217680 0.663063249934 1.000655254428 T T T

0.750644132233 0.998418927393 1.001563271614 T T T

0.750410136759 0.330955403320 1.001426308778 T T T

0.750746548156 0.664386170857 1.001586259831 T T T

0.125065957248 0.165035039491 1.001528197024 T T T

0.124858454850 0.497060574724 1.001685399505 T T T

0.122747338191 0.832203324624 0.002024813119 T T T

0.375244461250 0.165187362380 1.001486124474 T T T

0.375202314423 0.496090748139 1.001725143781 T T T

0.375094710977 0.835842128396 1.001148351899 T T T

0.625344527614 0.164944540592 1.001495794120 T T T

0.625174884828 0.497117312746 1.001503302966 T T T

0.627575743333 0.832195807473 1.001949681306 T T T  
0.875187827689 0.164437642223 1.001552503069 T T T  
0.874945719996 0.497515931414 1.001266337937 T T T  
0.875068716972 0.831308377324 1.001520653355 T T T  
0.000000000000 0.111111111000 0.083835882356 F F F  
0.000000000000 0.444444444000 0.083835882356 F F F  
0.000000000000 0.777777777001 0.083835882356 F F F  
0.250000000000 0.111111111000 0.083835882356 F F F  
0.250000000000 0.444444444000 0.083835882356 F F F  
0.250000000000 0.777777777001 0.083835882356 F F F  
0.500000000000 0.111111111000 0.083835882356 F F F  
0.500000000000 0.444444444000 0.083835882356 F F F  
0.500000000000 0.777777777001 0.083835882356 F F F  
0.750000000000 0.111111111000 0.083835882356 F F F  
0.750000000000 0.444444444000 0.083835882356 F F F  
0.750000000000 0.777777777001 0.083835882356 F F F  
0.125000000000 0.277777777001 0.083835882356 F F F  
0.125000000000 0.611111111000 0.083835882356 F F F  
0.125000000000 0.944444444000 0.083835882356 F F F  
0.375000000000 0.277777777001 0.083835882356 F F F  
0.375000000000 0.611111111000 0.083835882356 F F F  
0.375000000000 0.944444444000 0.083835882356 F F F  
0.625000000000 0.277777777001 0.083835882356 F F F  
0.625000000000 0.611111111000 0.083835882356 F F F  
0.625000000000 0.944444444000 0.083835882356 F F F  
0.875000000000 0.277777777001 0.083835882356 F F F  
0.875000000000 0.611111111000 0.083835882356 F F F  
0.875000000000 0.944444444000 0.083835882356 F F F  
0.125000000000 0.055555555000 0.165671764714 F F F  
0.125000000000 0.388888889000 0.165671764714 F F F

|                |                |                |   |   |   |
|----------------|----------------|----------------|---|---|---|
| 0.125000000000 | 0.72222222001  | 0.165671764714 | F | F | F |
| 0.375000000000 | 0.05555555000  | 0.165671764714 | F | F | F |
| 0.375000000000 | 0.38888889000  | 0.165671764714 | F | F | F |
| 0.375000000000 | 0.72222222001  | 0.165671764714 | F | F | F |
| 0.625000000000 | 0.05555555000  | 0.165671764714 | F | F | F |
| 0.625000000000 | 0.38888889000  | 0.165671764714 | F | F | F |
| 0.625000000000 | 0.72222222001  | 0.165671764714 | F | F | F |
| 0.875000000000 | 0.05555555000  | 0.165671764714 | F | F | F |
| 0.875000000000 | 0.38888889000  | 0.165671764714 | F | F | F |
| 0.875000000000 | 0.72222222001  | 0.165671764714 | F | F | F |
| 0.000000000000 | 0.22222222001  | 0.165671764714 | F | F | F |
| 0.000000000000 | 0.55555555000  | 0.165671764714 | F | F | F |
| 0.000000000000 | 0.88888889000  | 0.165671764714 | F | F | F |
| 0.250000000000 | 0.22222222001  | 0.165671764714 | F | F | F |
| 0.250000000000 | 0.55555555000  | 0.165671764714 | F | F | F |
| 0.250000000000 | 0.88888889000  | 0.165671764714 | F | F | F |
| 0.500000000000 | 0.22222222001  | 0.165671764714 | F | F | F |
| 0.500000000000 | 0.55555555000  | 0.165671764714 | F | F | F |
| 0.500000000000 | 0.88888889000  | 0.165671764714 | F | F | F |
| 0.750000000000 | 0.22222222001  | 0.165671764714 | F | F | F |
| 0.750000000000 | 0.55555555000  | 0.165671764714 | F | F | F |
| 0.750000000000 | 0.88888889000  | 0.165671764714 | F | F | F |
| 0.999896287703 | 0.003254232453 | 0.247969011128 | T | T | T |
| 0.999670506759 | 0.335939304416 | 0.247918641571 | T | T | T |
| 0.999584797752 | 0.669220681393 | 0.247883159435 | T | T | T |
| 0.249547314126 | 0.003421970282 | 0.247837563787 | T | T | T |
| 0.250044698806 | 0.335647074755 | 0.248072648929 | T | T | T |
| 0.247312594833 | 0.667753921239 | 0.249576355506 | T | T | T |
| 0.500531033999 | 0.003369864482 | 0.247808711787 | T | T | T |
| 0.500781243005 | 0.335538801980 | 0.248493867767 | T | T | T |

0.503201003807 0.667948382429 0.249226463072 T T T  
0.750348391283 0.003278353166 0.247964852248 T T T  
0.750348398777 0.335988732529 0.248130177669 T T T  
0.750436265823 0.669638510310 0.247754059926 T T T  
0.125057470343 0.169622364707 0.247977158833 T T T  
0.124658945672 0.502120445853 0.247821839410 T T T  
0.123230272083 0.836662858405 0.247513419456 T T T  
0.375223246603 0.170001766411 0.248071881369 T T T  
0.375067905632 0.500822155573 0.247676666403 T T T  
0.375057157470 0.839618992594 0.249071668961 T T T  
0.625050894806 0.169637934704 0.247988623121 T T T  
0.625420957102 0.502109094006 0.247836014047 T T T  
0.626927112835 0.836822498009 0.247600672364 T T T  
0.875118706168 0.169385835436 0.247891097507 T T T  
0.874928028319 0.502449130351 0.248449287518 T T T  
0.875135486430 0.836098334347 0.248066422274 T T T  
0.782036201184 0.598962829872 0.886548038908 T T T  
0.580840551587 0.543869261042 0.855560882758 T T T  
0.391919009974 0.627246402259 0.881915780768 T T T  
0.529256696568 0.384499624371 0.884997322124 T T T  
0.780459835687 0.598915864451 0.361460150446 T T T  
0.581354445742 0.537768358828 0.392718324264 T T T  
0.384696404175 0.612593139606 0.367906844299 T T T  
0.537219130648 0.376715747713 0.364682637598 T T T  
0.374614442931 0.726796385829 0.278853467610 T T T  
0.660954655224 0.563607322538 0.378445097367 T T T  
0.810919281395 0.561591686363 0.334494890151 T T T  
0.507728417003 0.575341570300 0.382082800214 T T T  
0.565802924484 0.470089621473 0.380817969007 T T T  
0.361734514431 0.675152660180 0.376468601381 T T T

0.368318166756 0.607372863472 0.333209626917 T T T  
 0.774740930309 0.660176749794 0.346825244469 T T T  
 0.548594089518 0.367647880497 0.329577584103 T T T  
 0.454446642141 0.358428899462 0.370308181350 T T T  
 0.374228676475 0.723003934224 0.972221619460 T T T  
 0.661739026526 0.568040297446 0.869411684627 T T T  
 0.796536539346 0.579597159238 0.920143755375 T T T  
 0.509796794012 0.583969484748 0.866666223243 T T T  
 0.562750726811 0.477014134518 0.867917183279 T T T  
 0.378081301134 0.692614231435 0.876412615765 T T T  
 0.376060844090 0.618181588934 0.916404036915 T T T  
 0.794785030800 0.665422793370 0.887462480993 T T T  
 0.552705900857 0.373395154956 0.918853734748 T T T  
 0.443232275453 0.373059580748 0.884961857985 T T T

**2) Small supercell FS**

POSCAR

2.80638615913204

4.000000000000000 0.000000000000000 0.000000000000000  
 0.000000000000000 5.19615242300000 0.000000000000000  
 0.000000000000000 0.000000000000000 9.97724418961000

Pt O H

96 8 20

Direct

0.000072924579 0.997975496633 1.003556874080 T T T  
 0.000069808796 0.330965874705 1.003643934416 T T T  
 0.000338986279 0.664415499732 1.003255866732 T T T  
 0.249413663870 0.997940483675 1.003523444041 T T T  
 0.250646471622 0.330574703313 1.003470056810 T T T  
 0.247551999218 0.664395999881 0.004250687973 T T T

0.499996546041 0.998128425552 1.003553711083 T T T  
0.500358270557 0.330073624334 1.003150581307 T T T  
0.499799220244 0.664154354455 1.000865177685 T T T  
0.750704121660 0.997827243623 1.003494394103 T T T  
0.749989305314 0.330592644272 1.003374165351 T T T  
0.752484379443 0.664380541828 0.004352936873 T T T  
0.125436940112 0.164503060722 1.003665248513 T T T  
0.124957902521 0.497244838790 1.003505745220 T T T  
0.124254123118 0.831356430941 1.003197642071 T T T  
0.375040331700 0.164336005287 1.003556321596 T T T  
0.374148159992 0.496421185420 0.004230413073 T T T  
0.373863444384 0.832636062445 0.004413072621 T T T  
0.625064810240 0.164180606520 1.003527161945 T T T  
0.626106226388 0.496500497519 0.004331244404 T T T  
0.625880876007 0.832344124827 0.004396519965 T T T  
0.874901405979 0.164410439774 1.003650735020 T T T  
0.875435492527 0.497274563800 1.003207165328 T T T  
0.875901710216 0.831365079573 1.003242449368 T T T  
0.000000000000 0.111111111000 0.085835882356 F F F  
0.000000000000 0.444444444000 0.085835882356 F F F  
0.000000000000 0.777777777001 0.085835882356 F F F  
0.250000000000 0.111111111000 0.085835882356 F F F  
0.250000000000 0.444444444000 0.085835882356 F F F  
0.250000000000 0.777777777001 0.085835882356 F F F  
0.500000000000 0.111111111000 0.085835882356 F F F  
0.500000000000 0.444444444000 0.085835882356 F F F  
0.500000000000 0.777777777001 0.085835882356 F F F  
0.750000000000 0.111111111000 0.085835882356 F F F  
0.750000000000 0.444444444000 0.085835882356 F F F  
0.750000000000 0.777777777001 0.085835882356 F F F

0.125000000000 0.277777777001 0.085835882356 F F F  
0.125000000000 0.611111111000 0.085835882356 F F F  
0.125000000000 0.944444444000 0.085835882356 F F F  
0.375000000000 0.277777777001 0.085835882356 F F F  
0.375000000000 0.611111111000 0.085835882356 F F F  
0.375000000000 0.944444444000 0.085835882356 F F F  
0.625000000000 0.277777777001 0.085835882356 F F F  
0.625000000000 0.611111111000 0.085835882356 F F F  
0.625000000000 0.944444444000 0.085835882356 F F F  
0.875000000000 0.277777777001 0.085835882356 F F F  
0.875000000000 0.611111111000 0.085835882356 F F F  
0.875000000000 0.944444444000 0.085835882356 F F F  
0.125000000000 0.055555555000 0.167671764714 F F F  
0.125000000000 0.388888889000 0.167671764714 F F F  
0.125000000000 0.722222222001 0.167671764714 F F F  
0.375000000000 0.055555555000 0.167671764714 F F F  
0.375000000000 0.388888889000 0.167671764714 F F F  
0.375000000000 0.722222222001 0.167671764714 F F F  
0.625000000000 0.055555555000 0.167671764714 F F F  
0.625000000000 0.388888889000 0.167671764714 F F F  
0.625000000000 0.722222222001 0.167671764714 F F F  
0.875000000000 0.055555555000 0.167671764714 F F F  
0.875000000000 0.388888889000 0.167671764714 F F F  
0.875000000000 0.722222222001 0.167671764714 F F F  
0.000000000000 0.222222222001 0.167671764714 F F F  
0.000000000000 0.555555555000 0.167671764714 F F F  
0.000000000000 0.888888889000 0.167671764714 F F F  
0.250000000000 0.222222222001 0.167671764714 F F F  
0.250000000000 0.555555555000 0.167671764714 F F F  
0.250000000000 0.888888889000 0.167671764714 F F F

0.500000000000 0.22222222001 0.167671764714 F F F  
0.500000000000 0.55555555000 0.167671764714 F F F  
0.500000000000 0.88888889000 0.167671764714 F F F  
0.750000000000 0.22222222001 0.167671764714 F F F  
0.750000000000 0.55555555000 0.167671764714 F F F  
0.750000000000 0.88888889000 0.167671764714 F F F  
0.000030202561 0.002366552098 0.249903328763 T T T  
0.999833888740 0.335250251769 0.249868165383 T T T  
0.000218797365 0.668767017202 0.250213974208 T T T  
0.250133811608 0.002658335753 0.249993923176 T T T  
0.249647314228 0.335219683385 0.249974389684 T T T  
0.247550907438 0.668765421736 0.249226343539 T T T  
0.499787143757 0.003131737885 0.250029464615 T T T  
0.500038815174 0.334752639048 0.250144184958 T T T  
0.499864830120 0.667985496227 0.252723704197 T T T  
0.749783685056 0.002718864250 0.250006642012 T T T  
0.750647819488 0.335481266065 0.250089476251 T T T  
0.752281077036 0.669052614661 0.249081105429 T T T  
0.125290854178 0.168698791732 0.249796780800 T T T  
0.124219459328 0.501746550195 0.250218037950 T T T  
0.124848442218 0.835926470748 0.250067948114 T T T  
0.374939569945 0.169066201460 0.249951310541 T T T  
0.373913992367 0.500460590172 0.249171002200 T T T  
0.373980022895 0.836765772848 0.249076518616 T T T  
0.624870804716 0.168996489725 0.249956960732 T T T  
0.625956262822 0.500747915647 0.249071940295 T T T  
0.625761044989 0.836736985937 0.249140713731 T T T  
0.874734059782 0.168762897925 0.249833770066 T T T  
0.875855999403 0.501801874426 0.250604414425 T T T  
0.875125609425 0.836019538149 0.250025413630 T T T



0.820474838782 0.589141072073 0.886108264545 T T T  
0.589670231855 0.556956440026 0.875805928635 T T T  
0.496194013520 0.670676684120 0.925941051120 T T T  
0.541772579306 0.380201178864 0.886091881844 T T T  
0.820269363251 0.584761725194 0.367331987933 T T T  
0.588662943504 0.560057392796 0.376980340380 T T T  
0.496476245477 0.675662422880 0.327544318697 T T T  
0.540198181788 0.384484853647 0.366786339949 T T T  
0.197521530385 0.804437671300 0.387879068515 T T T  
0.678308471111 0.567762717081 0.374282162771 T T T  
0.845462925783 0.560264437760 0.335976712740 T T T  
0.539619052614 0.614280892109 0.350047896938 T T T  
0.567985806493 0.492944818769 0.372010571622 T T T  
0.412464739336 0.682001572340 0.336467998141 T T T  
0.196958554696 0.814638260303 0.361340261208 T T T  
0.842330199524 0.649626496293 0.365787666038 T T T  
0.551978962871 0.363534938345 0.333404868707 T T T  
0.459281708661 0.364806884385 0.374710878756 T T T  
0.193329222090 0.809606713951 0.863396512830 T T T  
0.678878360703 0.566732440200 0.878589154673 T T T  
0.846235135776 0.567667367354 0.917955007490 T T T  
0.539158543802 0.610445774996 0.903256343216 T T T  
0.571022610320 0.489555994137 0.880691422245 T T T  
0.412553456216 0.678418660068 0.916828714763 T T T  
0.191313004543 0.819795262070 0.889920999394 T T T  
0.839787443887 0.654596953373 0.886228662015 T T T  
0.555540855571 0.359895718292 0.919416162131 T T T  
0.459254733628 0.362538339095 0.879595401960 T T T

### 3) Large supercell IS

POSCAR

2.80638615913151

8.000000000000000 0.000000000000000 0.000000000000000  
0.000000000000000 10.39230484600000 0.000000000000000  
0.000000000000000 0.000000000000000 9.97724418961000

Pt O H

384 32 80

Direct

|                  |                  |                  |   |   |   |
|------------------|------------------|------------------|---|---|---|
| 0.49989307000000 | 0.49926053000000 | 0.99959033100000 | T | T | T |
| 0.49989307000000 | 0.99926053000000 | 0.99959033100000 | T | T | T |
| 0.99989307000000 | 0.49926053000000 | 0.99959033100000 | T | T | T |
| 0.99989307000000 | 0.99926053000000 | 0.99959033100000 | T | T | T |
| 0.49986134700000 | 0.16555047600000 | 0.99967034700000 | T | T | T |
| 0.49986134700000 | 0.66555047600000 | 0.99967034700000 | T | T | T |
| 0.99986134700000 | 0.16555047600000 | 0.99967034700000 | T | T | T |
| 0.99986134700000 | 0.66555047600000 | 0.99967034700000 | T | T | T |
| 0.49976364700000 | 0.33208796800000 | 0.99950381300000 | T | T | T |
| 0.49976364700000 | 0.83208796800000 | 0.99950381300000 | T | T | T |
| 0.99976364700000 | 0.33208796800000 | 0.99950381300000 | T | T | T |
| 0.99976364700000 | 0.83208796800000 | 0.99950381300000 | T | T | T |
| 0.12475306900000 | 0.49952074200000 | 0.99962207200000 | T | T | T |
| 0.12475306900000 | 0.99952074200000 | 0.99962207200000 | T | T | T |
| 0.62475306900000 | 0.49952074200000 | 0.99962207200000 | T | T | T |
| 0.62475306900000 | 0.99952074200000 | 0.99962207200000 | T | T | T |
| 0.12505601400000 | 0.16528176600000 | 0.99951437000000 | T | T | T |
| 0.12505601400000 | 0.66528176600000 | 0.99951437000000 | T | T | T |
| 0.62505601400000 | 0.16528176600000 | 0.99951437000000 | T | T | T |
| 0.62505601400000 | 0.66528176600000 | 0.99951437000000 | T | T | T |
| 0.12309557900000 | 0.33143848000000 | 0.99840766600000 | T | T | T |

|                  |                  |                  |   |   |   |
|------------------|------------------|------------------|---|---|---|
| 0.12309557900000 | 0.83143848000000 | 0.99840766600000 | T | T | T |
| 0.62309557900000 | 0.33143848000000 | 0.99840766600000 | T | T | T |
| 0.62309557900000 | 0.83143848000000 | 0.99840766600000 | T | T | T |
| 0.25035376400000 | 0.49949198000000 | 0.99963354000000 | T | T | T |
| 0.25035376400000 | 0.99949198000000 | 0.99963354000000 | T | T | T |
| 0.75035376400000 | 0.49949198000000 | 0.99963354000000 | T | T | T |
| 0.75035376400000 | 0.99949198000000 | 0.99963354000000 | T | T | T |
| 0.25043301400000 | 0.16533014400000 | 0.99923434700000 | T | T | T |
| 0.25043301400000 | 0.66533014400000 | 0.99923434700000 | T | T | T |
| 0.75043301400000 | 0.16533014400000 | 0.99923434700000 | T | T | T |
| 0.75043301400000 | 0.66533014400000 | 0.99923434700000 | T | T | T |
| 0.25204010900000 | 0.33153162500000 | 0.99865525400000 | T | T | T |
| 0.25204010900000 | 0.83153162500000 | 0.99865525400000 | T | T | T |
| 0.75204010900000 | 0.33153162500000 | 0.99865525400000 | T | T | T |
| 0.75204010900000 | 0.83153162500000 | 0.99865525400000 | T | T | T |
| 0.37532206600000 | 0.49920946400000 | 0.99956327200000 | T | T | T |
| 0.37532206600000 | 0.99920946400000 | 0.99956327200000 | T | T | T |
| 0.87532206600000 | 0.49920946400000 | 0.99956327200000 | T | T | T |
| 0.87532206600000 | 0.99920946400000 | 0.99956327200000 | T | T | T |
| 0.37520506800000 | 0.16547770200000 | 0.99942630900000 | T | T | T |
| 0.37520506800000 | 0.66547770200000 | 0.99942630900000 | T | T | T |
| 0.87520506800000 | 0.16547770200000 | 0.99942630900000 | T | T | T |
| 0.87520506800000 | 0.66547770200000 | 0.99942630900000 | T | T | T |
| 0.37537327400000 | 0.33219308500000 | 0.99958626000000 | T | T | T |
| 0.37537327400000 | 0.83219308500000 | 0.99958626000000 | T | T | T |
| 0.87537327400000 | 0.33219308500000 | 0.99958626000000 | T | T | T |
| 0.87537327400000 | 0.83219308500000 | 0.99958626000000 | T | T | T |
| 0.06253297900000 | 0.08251752000000 | 0.99952819700000 | T | T | T |
| 0.06253297900000 | 0.58251752000000 | 0.99952819700000 | T | T | T |
| 0.56253297900000 | 0.08251752000000 | 0.99952819700000 | T | T | T |

|                  |                  |                  |   |   |   |
|------------------|------------------|------------------|---|---|---|
| 0.56253297900000 | 0.58251752000000 | 0.99952819700000 | T | T | T |
| 0.06242922700000 | 0.24853028700000 | 0.99968540000000 | T | T | T |
| 0.06242922700000 | 0.74853028700000 | 0.99968540000000 | T | T | T |
| 0.56242922700000 | 0.24853028700000 | 0.99968540000000 | T | T | T |
| 0.56242922700000 | 0.74853028700000 | 0.99968540000000 | T | T | T |
| 0.06137366900000 | 0.41610166200000 | 0.00002481310000 | T | T | T |
| 0.06137366900000 | 0.91610166200000 | 0.00002481310000 | T | T | T |
| 0.56137366900000 | 0.41610166200000 | 0.00002481310000 | T | T | T |
| 0.56137366900000 | 0.91610166200000 | 0.00002481310000 | T | T | T |
| 0.18762223100000 | 0.08259368100000 | 0.99948612500000 | T | T | T |
| 0.18762223100000 | 0.58259368100000 | 0.99948612500000 | T | T | T |
| 0.68762223100000 | 0.08259368100000 | 0.99948612500000 | T | T | T |
| 0.68762223100000 | 0.58259368100000 | 0.99948612500000 | T | T | T |
| 0.18760115700000 | 0.24804537400000 | 0.99972514400000 | T | T | T |
| 0.18760115700000 | 0.74804537400000 | 0.99972514400000 | T | T | T |
| 0.68760115700000 | 0.24804537400000 | 0.99972514400000 | T | T | T |
| 0.68760115700000 | 0.74804537400000 | 0.99972514400000 | T | T | T |
| 0.18754735600000 | 0.41792106400000 | 0.99914835200000 | T | T | T |
| 0.18754735600000 | 0.91792106400000 | 0.99914835200000 | T | T | T |
| 0.68754735600000 | 0.41792106400000 | 0.99914835200000 | T | T | T |
| 0.68754735600000 | 0.91792106400000 | 0.99914835200000 | T | T | T |
| 0.31267226400000 | 0.08247227000000 | 0.99949579400000 | T | T | T |
| 0.31267226400000 | 0.58247227000000 | 0.99949579400000 | T | T | T |
| 0.81267226400000 | 0.08247227000000 | 0.99949579400000 | T | T | T |
| 0.81267226400000 | 0.58247227000000 | 0.99949579400000 | T | T | T |
| 0.31258744200000 | 0.24855865600000 | 0.99950330300000 | T | T | T |
| 0.31258744200000 | 0.74855865600000 | 0.99950330300000 | T | T | T |
| 0.81258744200000 | 0.24855865600000 | 0.99950330300000 | T | T | T |
| 0.81258744200000 | 0.74855865600000 | 0.99950330300000 | T | T | T |
| 0.31378787200000 | 0.41609790400000 | 0.99994968100000 | T | T | T |

|                  |                  |                  |   |   |   |
|------------------|------------------|------------------|---|---|---|
| 0.31378787200000 | 0.91609790400000 | 0.99994968100000 | T | T | T |
| 0.81378787200000 | 0.41609790400000 | 0.99994968100000 | T | T | T |
| 0.81378787200000 | 0.91609790400000 | 0.99994968100000 | T | T | T |
| 0.43759391400000 | 0.08221882100000 | 0.99955250300000 | T | T | T |
| 0.43759391400000 | 0.58221882100000 | 0.99955250300000 | T | T | T |
| 0.93759391400000 | 0.08221882100000 | 0.99955250300000 | T | T | T |
| 0.93759391400000 | 0.58221882100000 | 0.99955250300000 | T | T | T |
| 0.43747286000000 | 0.24875796600000 | 0.99926633800000 | T | T | T |
| 0.43747286000000 | 0.74875796600000 | 0.99926633800000 | T | T | T |
| 0.93747286000000 | 0.24875796600000 | 0.99926633800000 | T | T | T |
| 0.93747286000000 | 0.74875796600000 | 0.99926633800000 | T | T | T |
| 0.43753435900000 | 0.41565418900000 | 0.99952065300000 | T | T | T |
| 0.43753435900000 | 0.91565418900000 | 0.99952065300000 | T | T | T |
| 0.93753435900000 | 0.41565418900000 | 0.99952065300000 | T | T | T |
| 0.93753435900000 | 0.91565418900000 | 0.99952065300000 | T | T | T |
| 0.00000000000000 | 0.05555555600000 | 0.08183588200000 | F | F | F |
| 0.00000000000000 | 0.55555555600000 | 0.08183588200000 | F | F | F |
| 0.50000000000000 | 0.05555555600000 | 0.08183588200000 | F | F | F |
| 0.50000000000000 | 0.55555555600000 | 0.08183588200000 | F | F | F |
| 0.00000000000000 | 0.22222222200000 | 0.08183588200000 | F | F | F |
| 0.00000000000000 | 0.72222222200000 | 0.08183588200000 | F | F | F |
| 0.50000000000000 | 0.22222222200000 | 0.08183588200000 | F | F | F |
| 0.50000000000000 | 0.72222222200000 | 0.08183588200000 | F | F | F |
| 0.00000000000000 | 0.38888888900000 | 0.08183588200000 | F | F | F |
| 0.00000000000000 | 0.88888888900000 | 0.08183588200000 | F | F | F |
| 0.50000000000000 | 0.38888888900000 | 0.08183588200000 | F | F | F |
| 0.50000000000000 | 0.88888888900000 | 0.08183588200000 | F | F | F |
| 0.12500000000000 | 0.05555555600000 | 0.08183588200000 | F | F | F |
| 0.12500000000000 | 0.55555555600000 | 0.08183588200000 | F | F | F |
| 0.62500000000000 | 0.05555555600000 | 0.08183588200000 | F | F | F |

|                    |                  |                  |   |   |   |
|--------------------|------------------|------------------|---|---|---|
| 0.6250000000000000 | 0.55555555600000 | 0.08183588200000 | F | F | F |
| 0.1250000000000000 | 0.22222222200000 | 0.08183588200000 | F | F | F |
| 0.1250000000000000 | 0.72222222200000 | 0.08183588200000 | F | F | F |
| 0.6250000000000000 | 0.22222222200000 | 0.08183588200000 | F | F | F |
| 0.6250000000000000 | 0.72222222200000 | 0.08183588200000 | F | F | F |
| 0.1250000000000000 | 0.38888888900000 | 0.08183588200000 | F | F | F |
| 0.1250000000000000 | 0.88888888900000 | 0.08183588200000 | F | F | F |
| 0.6250000000000000 | 0.38888888900000 | 0.08183588200000 | F | F | F |
| 0.6250000000000000 | 0.88888888900000 | 0.08183588200000 | F | F | F |
| 0.2500000000000000 | 0.05555555600000 | 0.08183588200000 | F | F | F |
| 0.2500000000000000 | 0.55555555600000 | 0.08183588200000 | F | F | F |
| 0.7500000000000000 | 0.05555555600000 | 0.08183588200000 | F | F | F |
| 0.7500000000000000 | 0.55555555600000 | 0.08183588200000 | F | F | F |
| 0.2500000000000000 | 0.22222222200000 | 0.08183588200000 | F | F | F |
| 0.2500000000000000 | 0.72222222200000 | 0.08183588200000 | F | F | F |
| 0.7500000000000000 | 0.22222222200000 | 0.08183588200000 | F | F | F |
| 0.7500000000000000 | 0.72222222200000 | 0.08183588200000 | F | F | F |
| 0.2500000000000000 | 0.38888888900000 | 0.08183588200000 | F | F | F |
| 0.2500000000000000 | 0.88888888900000 | 0.08183588200000 | F | F | F |
| 0.7500000000000000 | 0.38888888900000 | 0.08183588200000 | F | F | F |
| 0.7500000000000000 | 0.88888888900000 | 0.08183588200000 | F | F | F |
| 0.3750000000000000 | 0.05555555600000 | 0.08183588200000 | F | F | F |
| 0.3750000000000000 | 0.55555555600000 | 0.08183588200000 | F | F | F |
| 0.8750000000000000 | 0.05555555600000 | 0.08183588200000 | F | F | F |
| 0.8750000000000000 | 0.55555555600000 | 0.08183588200000 | F | F | F |
| 0.3750000000000000 | 0.22222222200000 | 0.08183588200000 | F | F | F |
| 0.3750000000000000 | 0.72222222200000 | 0.08183588200000 | F | F | F |
| 0.8750000000000000 | 0.22222222200000 | 0.08183588200000 | F | F | F |
| 0.8750000000000000 | 0.72222222200000 | 0.08183588200000 | F | F | F |
| 0.3750000000000000 | 0.38888888900000 | 0.08183588200000 | F | F | F |

|                    |                   |                   |   |   |   |
|--------------------|-------------------|-------------------|---|---|---|
| 0.3750000000000000 | 0.888888889000000 | 0.081835882000000 | F | F | F |
| 0.8750000000000000 | 0.388888889000000 | 0.081835882000000 | F | F | F |
| 0.8750000000000000 | 0.888888889000000 | 0.081835882000000 | F | F | F |
| 0.0625000000000000 | 0.138888889000000 | 0.081835882000000 | F | F | F |
| 0.0625000000000000 | 0.638888889000000 | 0.081835882000000 | F | F | F |
| 0.5625000000000000 | 0.138888889000000 | 0.081835882000000 | F | F | F |
| 0.5625000000000000 | 0.638888889000000 | 0.081835882000000 | F | F | F |
| 0.0625000000000000 | 0.305555556000000 | 0.081835882000000 | F | F | F |
| 0.0625000000000000 | 0.805555556000000 | 0.081835882000000 | F | F | F |
| 0.5625000000000000 | 0.305555556000000 | 0.081835882000000 | F | F | F |
| 0.5625000000000000 | 0.805555556000000 | 0.081835882000000 | F | F | F |
| 0.0625000000000000 | 0.472222222000000 | 0.081835882000000 | F | F | F |
| 0.0625000000000000 | 0.972222222000000 | 0.081835882000000 | F | F | F |
| 0.5625000000000000 | 0.472222222000000 | 0.081835882000000 | F | F | F |
| 0.5625000000000000 | 0.972222222000000 | 0.081835882000000 | F | F | F |
| 0.1875000000000000 | 0.138888889000000 | 0.081835882000000 | F | F | F |
| 0.1875000000000000 | 0.638888889000000 | 0.081835882000000 | F | F | F |
| 0.6875000000000000 | 0.138888889000000 | 0.081835882000000 | F | F | F |
| 0.6875000000000000 | 0.638888889000000 | 0.081835882000000 | F | F | F |
| 0.1875000000000000 | 0.305555556000000 | 0.081835882000000 | F | F | F |
| 0.1875000000000000 | 0.805555556000000 | 0.081835882000000 | F | F | F |
| 0.6875000000000000 | 0.305555556000000 | 0.081835882000000 | F | F | F |
| 0.6875000000000000 | 0.805555556000000 | 0.081835882000000 | F | F | F |
| 0.1875000000000000 | 0.472222222000000 | 0.081835882000000 | F | F | F |
| 0.1875000000000000 | 0.972222222000000 | 0.081835882000000 | F | F | F |
| 0.6875000000000000 | 0.472222222000000 | 0.081835882000000 | F | F | F |
| 0.6875000000000000 | 0.972222222000000 | 0.081835882000000 | F | F | F |
| 0.3125000000000000 | 0.138888889000000 | 0.081835882000000 | F | F | F |
| 0.3125000000000000 | 0.638888889000000 | 0.081835882000000 | F | F | F |
| 0.8125000000000000 | 0.138888889000000 | 0.081835882000000 | F | F | F |

|                    |                   |                  |   |   |   |
|--------------------|-------------------|------------------|---|---|---|
| 0.8125000000000000 | 0.638888889000000 | 0.08183588200000 | F | F | F |
| 0.3125000000000000 | 0.305555556000000 | 0.08183588200000 | F | F | F |
| 0.3125000000000000 | 0.805555556000000 | 0.08183588200000 | F | F | F |
| 0.8125000000000000 | 0.305555556000000 | 0.08183588200000 | F | F | F |
| 0.8125000000000000 | 0.805555556000000 | 0.08183588200000 | F | F | F |
| 0.3125000000000000 | 0.472222222000000 | 0.08183588200000 | F | F | F |
| 0.3125000000000000 | 0.972222222000000 | 0.08183588200000 | F | F | F |
| 0.8125000000000000 | 0.472222222000000 | 0.08183588200000 | F | F | F |
| 0.8125000000000000 | 0.972222222000000 | 0.08183588200000 | F | F | F |
| 0.4375000000000000 | 0.138888889000000 | 0.08183588200000 | F | F | F |
| 0.4375000000000000 | 0.638888889000000 | 0.08183588200000 | F | F | F |
| 0.9375000000000000 | 0.138888889000000 | 0.08183588200000 | F | F | F |
| 0.9375000000000000 | 0.638888889000000 | 0.08183588200000 | F | F | F |
| 0.4375000000000000 | 0.305555556000000 | 0.08183588200000 | F | F | F |
| 0.4375000000000000 | 0.805555556000000 | 0.08183588200000 | F | F | F |
| 0.9375000000000000 | 0.305555556000000 | 0.08183588200000 | F | F | F |
| 0.9375000000000000 | 0.805555556000000 | 0.08183588200000 | F | F | F |
| 0.4375000000000000 | 0.472222222000000 | 0.08183588200000 | F | F | F |
| 0.4375000000000000 | 0.972222222000000 | 0.08183588200000 | F | F | F |
| 0.9375000000000000 | 0.472222222000000 | 0.08183588200000 | F | F | F |
| 0.9375000000000000 | 0.972222222000000 | 0.08183588200000 | F | F | F |
| 0.0625000000000000 | 0.027777778000000 | 0.16367176500000 | F | F | F |
| 0.0625000000000000 | 0.527777778000000 | 0.16367176500000 | F | F | F |
| 0.5625000000000000 | 0.027777778000000 | 0.16367176500000 | F | F | F |
| 0.5625000000000000 | 0.527777778000000 | 0.16367176500000 | F | F | F |
| 0.0625000000000000 | 0.194444445000000 | 0.16367176500000 | F | F | F |
| 0.0625000000000000 | 0.694444445000000 | 0.16367176500000 | F | F | F |
| 0.5625000000000000 | 0.194444445000000 | 0.16367176500000 | F | F | F |
| 0.5625000000000000 | 0.694444445000000 | 0.16367176500000 | F | F | F |
| 0.0625000000000000 | 0.361111111000000 | 0.16367176500000 | F | F | F |



|                  |                  |                  |   |   |   |
|------------------|------------------|------------------|---|---|---|
| 0.06250000000000 | 0.86111111100000 | 0.16367176500000 | F | F | F |
| 0.56250000000000 | 0.36111111100000 | 0.16367176500000 | F | F | F |
| 0.56250000000000 | 0.86111111100000 | 0.16367176500000 | F | F | F |
| 0.18750000000000 | 0.02777777800000 | 0.16367176500000 | F | F | F |
| 0.18750000000000 | 0.52777777800000 | 0.16367176500000 | F | F | F |
| 0.68750000000000 | 0.02777777800000 | 0.16367176500000 | F | F | F |
| 0.68750000000000 | 0.52777777800000 | 0.16367176500000 | F | F | F |
| 0.18750000000000 | 0.19444444500000 | 0.16367176500000 | F | F | F |
| 0.18750000000000 | 0.69444444500000 | 0.16367176500000 | F | F | F |
| 0.68750000000000 | 0.19444444500000 | 0.16367176500000 | F | F | F |
| 0.68750000000000 | 0.69444444500000 | 0.16367176500000 | F | F | F |
| 0.18750000000000 | 0.36111111100000 | 0.16367176500000 | F | F | F |
| 0.18750000000000 | 0.86111111100000 | 0.16367176500000 | F | F | F |
| 0.68750000000000 | 0.36111111100000 | 0.16367176500000 | F | F | F |
| 0.68750000000000 | 0.86111111100000 | 0.16367176500000 | F | F | F |
| 0.31250000000000 | 0.02777777800000 | 0.16367176500000 | F | F | F |
| 0.31250000000000 | 0.52777777800000 | 0.16367176500000 | F | F | F |
| 0.81250000000000 | 0.02777777800000 | 0.16367176500000 | F | F | F |
| 0.81250000000000 | 0.52777777800000 | 0.16367176500000 | F | F | F |
| 0.31250000000000 | 0.19444444500000 | 0.16367176500000 | F | F | F |
| 0.31250000000000 | 0.69444444500000 | 0.16367176500000 | F | F | F |
| 0.81250000000000 | 0.19444444500000 | 0.16367176500000 | F | F | F |
| 0.81250000000000 | 0.69444444500000 | 0.16367176500000 | F | F | F |
| 0.31250000000000 | 0.36111111100000 | 0.16367176500000 | F | F | F |
| 0.31250000000000 | 0.86111111100000 | 0.16367176500000 | F | F | F |
| 0.81250000000000 | 0.36111111100000 | 0.16367176500000 | F | F | F |
| 0.81250000000000 | 0.86111111100000 | 0.16367176500000 | F | F | F |
| 0.43750000000000 | 0.02777777800000 | 0.16367176500000 | F | F | F |
| 0.43750000000000 | 0.52777777800000 | 0.16367176500000 | F | F | F |
| 0.93750000000000 | 0.02777777800000 | 0.16367176500000 | F | F | F |

|                    |                  |                  |   |   |   |
|--------------------|------------------|------------------|---|---|---|
| 0.9375000000000000 | 0.52777777800000 | 0.16367176500000 | F | F | F |
| 0.4375000000000000 | 0.19444444500000 | 0.16367176500000 | F | F | F |
| 0.4375000000000000 | 0.69444444500000 | 0.16367176500000 | F | F | F |
| 0.9375000000000000 | 0.19444444500000 | 0.16367176500000 | F | F | F |
| 0.9375000000000000 | 0.69444444500000 | 0.16367176500000 | F | F | F |
| 0.4375000000000000 | 0.36111111100000 | 0.16367176500000 | F | F | F |
| 0.4375000000000000 | 0.86111111100000 | 0.16367176500000 | F | F | F |
| 0.9375000000000000 | 0.36111111100000 | 0.16367176500000 | F | F | F |
| 0.9375000000000000 | 0.86111111100000 | 0.16367176500000 | F | F | F |
| 0.0000000000000000 | 0.11111111100000 | 0.16367176500000 | F | F | F |
| 0.0000000000000000 | 0.61111111100000 | 0.16367176500000 | F | F | F |
| 0.5000000000000000 | 0.11111111100000 | 0.16367176500000 | F | F | F |
| 0.5000000000000000 | 0.61111111100000 | 0.16367176500000 | F | F | F |
| 0.0000000000000000 | 0.27777777800000 | 0.16367176500000 | F | F | F |
| 0.0000000000000000 | 0.77777777800000 | 0.16367176500000 | F | F | F |
| 0.5000000000000000 | 0.27777777800000 | 0.16367176500000 | F | F | F |
| 0.5000000000000000 | 0.77777777800000 | 0.16367176500000 | F | F | F |
| 0.0000000000000000 | 0.44444444500000 | 0.16367176500000 | F | F | F |
| 0.0000000000000000 | 0.94444444500000 | 0.16367176500000 | F | F | F |
| 0.5000000000000000 | 0.44444444500000 | 0.16367176500000 | F | F | F |
| 0.5000000000000000 | 0.94444444500000 | 0.16367176500000 | F | F | F |
| 0.1250000000000000 | 0.11111111100000 | 0.16367176500000 | F | F | F |
| 0.1250000000000000 | 0.61111111100000 | 0.16367176500000 | F | F | F |
| 0.6250000000000000 | 0.11111111100000 | 0.16367176500000 | F | F | F |
| 0.6250000000000000 | 0.61111111100000 | 0.16367176500000 | F | F | F |
| 0.1250000000000000 | 0.27777777800000 | 0.16367176500000 | F | F | F |
| 0.1250000000000000 | 0.77777777800000 | 0.16367176500000 | F | F | F |
| 0.6250000000000000 | 0.27777777800000 | 0.16367176500000 | F | F | F |
| 0.6250000000000000 | 0.77777777800000 | 0.16367176500000 | F | F | F |
| 0.1250000000000000 | 0.44444444500000 | 0.16367176500000 | F | F | F |

|                   |                   |                   |   |   |   |
|-------------------|-------------------|-------------------|---|---|---|
| 0.125000000000000 | 0.944444444500000 | 0.163671765000000 | F | F | F |
| 0.625000000000000 | 0.444444444500000 | 0.163671765000000 | F | F | F |
| 0.625000000000000 | 0.944444444500000 | 0.163671765000000 | F | F | F |
| 0.250000000000000 | 0.111111111100000 | 0.163671765000000 | F | F | F |
| 0.250000000000000 | 0.611111111100000 | 0.163671765000000 | F | F | F |
| 0.750000000000000 | 0.111111111100000 | 0.163671765000000 | F | F | F |
| 0.750000000000000 | 0.611111111100000 | 0.163671765000000 | F | F | F |
| 0.250000000000000 | 0.277777777800000 | 0.163671765000000 | F | F | F |
| 0.250000000000000 | 0.777777777800000 | 0.163671765000000 | F | F | F |
| 0.750000000000000 | 0.277777777800000 | 0.163671765000000 | F | F | F |
| 0.750000000000000 | 0.777777777800000 | 0.163671765000000 | F | F | F |
| 0.250000000000000 | 0.444444444500000 | 0.163671765000000 | F | F | F |
| 0.250000000000000 | 0.944444444500000 | 0.163671765000000 | F | F | F |
| 0.750000000000000 | 0.444444444500000 | 0.163671765000000 | F | F | F |
| 0.750000000000000 | 0.944444444500000 | 0.163671765000000 | F | F | F |
| 0.375000000000000 | 0.111111111100000 | 0.163671765000000 | F | F | F |
| 0.375000000000000 | 0.611111111100000 | 0.163671765000000 | F | F | F |
| 0.875000000000000 | 0.111111111100000 | 0.163671765000000 | F | F | F |
| 0.875000000000000 | 0.611111111100000 | 0.163671765000000 | F | F | F |
| 0.375000000000000 | 0.277777777800000 | 0.163671765000000 | F | F | F |
| 0.375000000000000 | 0.777777777800000 | 0.163671765000000 | F | F | F |
| 0.875000000000000 | 0.277777777800000 | 0.163671765000000 | F | F | F |
| 0.875000000000000 | 0.777777777800000 | 0.163671765000000 | F | F | F |
| 0.375000000000000 | 0.444444444500000 | 0.163671765000000 | F | F | F |
| 0.375000000000000 | 0.944444444500000 | 0.163671765000000 | F | F | F |
| 0.875000000000000 | 0.444444444500000 | 0.163671765000000 | F | F | F |
| 0.875000000000000 | 0.944444444500000 | 0.163671765000000 | F | F | F |
| 0.499948144000000 | 0.001627116000000 | 0.245969011000000 | T | T | T |
| 0.499948144000000 | 0.501627116000000 | 0.245969011000000 | T | T | T |
| 0.999948144000000 | 0.001627116000000 | 0.245969011000000 | T | T | T |

|                  |                  |                  |   |   |   |
|------------------|------------------|------------------|---|---|---|
| 0.99994814400000 | 0.50162711600000 | 0.24596901100000 | T | T | T |
| 0.49983525300000 | 0.16796965200000 | 0.24591864200000 | T | T | T |
| 0.49983525300000 | 0.66796965200000 | 0.24591864200000 | T | T | T |
| 0.99983525300000 | 0.16796965200000 | 0.24591864200000 | T | T | T |
| 0.99983525300000 | 0.66796965200000 | 0.24591864200000 | T | T | T |
| 0.49979239900000 | 0.33461034100000 | 0.24588315900000 | T | T | T |
| 0.49979239900000 | 0.83461034100000 | 0.24588315900000 | T | T | T |
| 0.99979239900000 | 0.33461034100000 | 0.24588315900000 | T | T | T |
| 0.99979239900000 | 0.83461034100000 | 0.24588315900000 | T | T | T |
| 0.12477365700000 | 0.00171098500000 | 0.24583756400000 | T | T | T |
| 0.12477365700000 | 0.50171098500000 | 0.24583756400000 | T | T | T |
| 0.62477365700000 | 0.00171098500000 | 0.24583756400000 | T | T | T |
| 0.62477365700000 | 0.50171098500000 | 0.24583756400000 | T | T | T |
| 0.12502234900000 | 0.16782353700000 | 0.24607264900000 | T | T | T |
| 0.12502234900000 | 0.66782353700000 | 0.24607264900000 | T | T | T |
| 0.62502234900000 | 0.16782353700000 | 0.24607264900000 | T | T | T |
| 0.62502234900000 | 0.66782353700000 | 0.24607264900000 | T | T | T |
| 0.12365629700000 | 0.33387696100000 | 0.24757635600000 | T | T | T |
| 0.12365629700000 | 0.83387696100000 | 0.24757635600000 | T | T | T |
| 0.62365629700000 | 0.33387696100000 | 0.24757635600000 | T | T | T |
| 0.62365629700000 | 0.83387696100000 | 0.24757635600000 | T | T | T |
| 0.25026551700000 | 0.00168493200000 | 0.24580871200000 | T | T | T |
| 0.25026551700000 | 0.50168493200000 | 0.24580871200000 | T | T | T |
| 0.75026551700000 | 0.00168493200000 | 0.24580871200000 | T | T | T |
| 0.75026551700000 | 0.50168493200000 | 0.24580871200000 | T | T | T |
| 0.25039062200000 | 0.16776940100000 | 0.24649386800000 | T | T | T |
| 0.25039062200000 | 0.66776940100000 | 0.24649386800000 | T | T | T |
| 0.75039062200000 | 0.16776940100000 | 0.24649386800000 | T | T | T |
| 0.75039062200000 | 0.66776940100000 | 0.24649386800000 | T | T | T |
| 0.25160050200000 | 0.33397419100000 | 0.24722646300000 | T | T | T |

|                  |                  |                  |   |   |   |
|------------------|------------------|------------------|---|---|---|
| 0.25160050200000 | 0.83397419100000 | 0.24722646300000 | T | T | T |
| 0.75160050200000 | 0.33397419100000 | 0.24722646300000 | T | T | T |
| 0.75160050200000 | 0.83397419100000 | 0.24722646300000 | T | T | T |
| 0.37517419600000 | 0.00163917700000 | 0.24596485200000 | T | T | T |
| 0.37517419600000 | 0.50163917700000 | 0.24596485200000 | T | T | T |
| 0.87517419600000 | 0.00163917700000 | 0.24596485200000 | T | T | T |
| 0.87517419600000 | 0.50163917700000 | 0.24596485200000 | T | T | T |
| 0.37517419900000 | 0.16799436600000 | 0.24613017800000 | T | T | T |
| 0.37517419900000 | 0.66799436600000 | 0.24613017800000 | T | T | T |
| 0.87517419900000 | 0.16799436600000 | 0.24613017800000 | T | T | T |
| 0.87517419900000 | 0.66799436600000 | 0.24613017800000 | T | T | T |
| 0.37521813300000 | 0.33481925500000 | 0.24575406000000 | T | T | T |
| 0.37521813300000 | 0.83481925500000 | 0.24575406000000 | T | T | T |
| 0.87521813300000 | 0.33481925500000 | 0.24575406000000 | T | T | T |
| 0.87521813300000 | 0.83481925500000 | 0.24575406000000 | T | T | T |
| 0.06252873500000 | 0.08481118200000 | 0.24597715900000 | T | T | T |
| 0.06252873500000 | 0.58481118200000 | 0.24597715900000 | T | T | T |
| 0.56252873500000 | 0.08481118200000 | 0.24597715900000 | T | T | T |
| 0.56252873500000 | 0.58481118200000 | 0.24597715900000 | T | T | T |
| 0.06232947300000 | 0.25106022300000 | 0.24582183900000 | T | T | T |
| 0.06232947300000 | 0.75106022300000 | 0.24582183900000 | T | T | T |
| 0.56232947300000 | 0.25106022300000 | 0.24582183900000 | T | T | T |
| 0.56232947300000 | 0.75106022300000 | 0.24582183900000 | T | T | T |
| 0.06161513600000 | 0.41833142900000 | 0.24551342000000 | T | T | T |
| 0.06161513600000 | 0.91833142900000 | 0.24551342000000 | T | T | T |
| 0.56161513600000 | 0.41833142900000 | 0.24551342000000 | T | T | T |
| 0.56161513600000 | 0.91833142900000 | 0.24551342000000 | T | T | T |
| 0.18761162300000 | 0.08500088300000 | 0.24607188100000 | T | T | T |
| 0.18761162300000 | 0.58500088300000 | 0.24607188100000 | T | T | T |
| 0.68761162300000 | 0.08500088300000 | 0.24607188100000 | T | T | T |

|                  |                  |                  |   |   |   |
|------------------|------------------|------------------|---|---|---|
| 0.68761162300000 | 0.58500088300000 | 0.24607188100000 | T | T | T |
| 0.18753395300000 | 0.25041107800000 | 0.24567666600000 | T | T | T |
| 0.18753395300000 | 0.75041107800000 | 0.24567666600000 | T | T | T |
| 0.68753395300000 | 0.25041107800000 | 0.24567666600000 | T | T | T |
| 0.68753395300000 | 0.75041107800000 | 0.24567666600000 | T | T | T |
| 0.18752857900000 | 0.41980949600000 | 0.24707166900000 | T | T | T |
| 0.18752857900000 | 0.91980949600000 | 0.24707166900000 | T | T | T |
| 0.68752857900000 | 0.41980949600000 | 0.24707166900000 | T | T | T |
| 0.68752857900000 | 0.91980949600000 | 0.24707166900000 | T | T | T |
| 0.31252544700000 | 0.08481896700000 | 0.24598862300000 | T | T | T |
| 0.31252544700000 | 0.58481896700000 | 0.24598862300000 | T | T | T |
| 0.81252544700000 | 0.08481896700000 | 0.24598862300000 | T | T | T |
| 0.81252544700000 | 0.58481896700000 | 0.24598862300000 | T | T | T |
| 0.31271047900000 | 0.25105454700000 | 0.24583601400000 | T | T | T |
| 0.31271047900000 | 0.75105454700000 | 0.24583601400000 | T | T | T |
| 0.81271047900000 | 0.25105454700000 | 0.24583601400000 | T | T | T |
| 0.81271047900000 | 0.75105454700000 | 0.24583601400000 | T | T | T |
| 0.31346355600000 | 0.41841124900000 | 0.24560067200000 | T | T | T |
| 0.31346355600000 | 0.91841124900000 | 0.24560067200000 | T | T | T |
| 0.81346355600000 | 0.41841124900000 | 0.24560067200000 | T | T | T |
| 0.81346355600000 | 0.91841124900000 | 0.24560067200000 | T | T | T |
| 0.43755935300000 | 0.08469291800000 | 0.24589109800000 | T | T | T |
| 0.43755935300000 | 0.58469291800000 | 0.24589109800000 | T | T | T |
| 0.93755935300000 | 0.08469291800000 | 0.24589109800000 | T | T | T |
| 0.93755935300000 | 0.58469291800000 | 0.24589109800000 | T | T | T |
| 0.43746401400000 | 0.25122456500000 | 0.24644928800000 | T | T | T |
| 0.43746401400000 | 0.75122456500000 | 0.24644928800000 | T | T | T |
| 0.93746401400000 | 0.25122456500000 | 0.24644928800000 | T | T | T |
| 0.93746401400000 | 0.75122456500000 | 0.24644928800000 | T | T | T |
| 0.43756774300000 | 0.41804916700000 | 0.24606642200000 | T | T | T |

|                  |                  |                  |   |   |   |
|------------------|------------------|------------------|---|---|---|
| 0.43756774300000 | 0.91804916700000 | 0.24606642200000 | T | T | T |
| 0.93756774300000 | 0.41804916700000 | 0.24606642200000 | T | T | T |
| 0.93756774300000 | 0.91804916700000 | 0.24606642200000 | T | T | T |
| 0.39101810100000 | 0.29948141500000 | 0.88454803900000 | T | T | T |
| 0.39101810100000 | 0.79948141500000 | 0.88454803900000 | T | T | T |
| 0.89101810100000 | 0.29948141500000 | 0.88454803900000 | T | T | T |
| 0.89101810100000 | 0.79948141500000 | 0.88454803900000 | T | T | T |
| 0.29042027600000 | 0.27193463100000 | 0.85356088300000 | T | T | T |
| 0.29042027600000 | 0.77193463100000 | 0.85356088300000 | T | T | T |
| 0.79042027600000 | 0.27193463100000 | 0.85356088300000 | T | T | T |
| 0.79042027600000 | 0.77193463100000 | 0.85356088300000 | T | T | T |
| 0.19595950500000 | 0.31362320100000 | 0.87991578100000 | T | T | T |
| 0.19595950500000 | 0.81362320100000 | 0.87991578100000 | T | T | T |
| 0.69595950500000 | 0.31362320100000 | 0.87991578100000 | T | T | T |
| 0.69595950500000 | 0.81362320100000 | 0.87991578100000 | T | T | T |
| 0.26462834800000 | 0.19224981200000 | 0.88299732200000 | T | T | T |
| 0.26462834800000 | 0.69224981200000 | 0.88299732200000 | T | T | T |
| 0.76462834800000 | 0.19224981200000 | 0.88299732200000 | T | T | T |
| 0.76462834800000 | 0.69224981200000 | 0.88299732200000 | T | T | T |
| 0.39022991800000 | 0.29945793200000 | 0.35946015000000 | T | T | T |
| 0.39022991800000 | 0.79945793200000 | 0.35946015000000 | T | T | T |
| 0.89022991800000 | 0.29945793200000 | 0.35946015000000 | T | T | T |
| 0.89022991800000 | 0.79945793200000 | 0.35946015000000 | T | T | T |
| 0.29067722300000 | 0.26888417900000 | 0.39071832400000 | T | T | T |
| 0.29067722300000 | 0.76888417900000 | 0.39071832400000 | T | T | T |
| 0.79067722300000 | 0.26888417900000 | 0.39071832400000 | T | T | T |
| 0.79067722300000 | 0.76888417900000 | 0.39071832400000 | T | T | T |
| 0.19234820200000 | 0.30629657000000 | 0.36590684400000 | T | T | T |
| 0.19234820200000 | 0.80629657000000 | 0.36590684400000 | T | T | T |
| 0.69234820200000 | 0.30629657000000 | 0.36590684400000 | T | T | T |

|                  |                  |                  |   |   |   |
|------------------|------------------|------------------|---|---|---|
| 0.69234820200000 | 0.80629657000000 | 0.36590684400000 | T | T | T |
| 0.26860956500000 | 0.18835787400000 | 0.36268263800000 | T | T | T |
| 0.26860956500000 | 0.68835787400000 | 0.36268263800000 | T | T | T |
| 0.76860956500000 | 0.18835787400000 | 0.36268263800000 | T | T | T |
| 0.76860956500000 | 0.68835787400000 | 0.36268263800000 | T | T | T |
| 0.18730722200000 | 0.36339819300000 | 0.27685346800000 | T | T | T |
| 0.18730722200000 | 0.86339819300000 | 0.27685346800000 | T | T | T |
| 0.68730722200000 | 0.36339819300000 | 0.27685346800000 | T | T | T |
| 0.68730722200000 | 0.86339819300000 | 0.27685346800000 | T | T | T |
| 0.33047732800000 | 0.28180366100000 | 0.37644509700000 | T | T | T |
| 0.33047732800000 | 0.78180366100000 | 0.37644509700000 | T | T | T |
| 0.83047732800000 | 0.28180366100000 | 0.37644509700000 | T | T | T |
| 0.83047732800000 | 0.78180366100000 | 0.37644509700000 | T | T | T |
| 0.40545964100000 | 0.28079584300000 | 0.33249489000000 | T | T | T |
| 0.40545964100000 | 0.78079584300000 | 0.33249489000000 | T | T | T |
| 0.90545964100000 | 0.28079584300000 | 0.33249489000000 | T | T | T |
| 0.90545964100000 | 0.78079584300000 | 0.33249489000000 | T | T | T |
| 0.25386420900000 | 0.28767078500000 | 0.38008280000000 | T | T | T |
| 0.25386420900000 | 0.78767078500000 | 0.38008280000000 | T | T | T |
| 0.75386420900000 | 0.28767078500000 | 0.38008280000000 | T | T | T |
| 0.75386420900000 | 0.78767078500000 | 0.38008280000000 | T | T | T |
| 0.28290146200000 | 0.23504481100000 | 0.37881796900000 | T | T | T |
| 0.28290146200000 | 0.73504481100000 | 0.37881796900000 | T | T | T |
| 0.78290146200000 | 0.23504481100000 | 0.37881796900000 | T | T | T |
| 0.78290146200000 | 0.73504481100000 | 0.37881796900000 | T | T | T |
| 0.18086725700000 | 0.33757633000000 | 0.37446860100000 | T | T | T |
| 0.18086725700000 | 0.83757633000000 | 0.37446860100000 | T | T | T |
| 0.68086725700000 | 0.33757633000000 | 0.37446860100000 | T | T | T |
| 0.68086725700000 | 0.83757633000000 | 0.37446860100000 | T | T | T |
| 0.18415908300000 | 0.30368643200000 | 0.33120962700000 | T | T | T |



|                  |                  |                  |   |   |   |
|------------------|------------------|------------------|---|---|---|
| 0.18415908300000 | 0.80368643200000 | 0.33120962700000 | T | T | T |
| 0.68415908300000 | 0.30368643200000 | 0.33120962700000 | T | T | T |
| 0.68415908300000 | 0.80368643200000 | 0.33120962700000 | T | T | T |
| 0.38737046500000 | 0.33008837500000 | 0.34482524500000 | T | T | T |
| 0.38737046500000 | 0.83008837500000 | 0.34482524500000 | T | T | T |
| 0.88737046500000 | 0.33008837500000 | 0.34482524500000 | T | T | T |
| 0.88737046500000 | 0.83008837500000 | 0.34482524500000 | T | T | T |
| 0.27429704500000 | 0.18382394000000 | 0.32757758400000 | T | T | T |
| 0.27429704500000 | 0.68382394000000 | 0.32757758400000 | T | T | T |
| 0.77429704500000 | 0.18382394000000 | 0.32757758400000 | T | T | T |
| 0.77429704500000 | 0.68382394000000 | 0.32757758400000 | T | T | T |
| 0.22722332100000 | 0.17921445000000 | 0.36830818100000 | T | T | T |
| 0.22722332100000 | 0.67921445000000 | 0.36830818100000 | T | T | T |
| 0.72722332100000 | 0.17921445000000 | 0.36830818100000 | T | T | T |
| 0.72722332100000 | 0.67921445000000 | 0.36830818100000 | T | T | T |
| 0.18711433800000 | 0.36150196700000 | 0.97022162000000 | T | T | T |
| 0.18711433800000 | 0.86150196700000 | 0.97022162000000 | T | T | T |
| 0.68711433800000 | 0.36150196700000 | 0.97022162000000 | T | T | T |
| 0.68711433800000 | 0.86150196700000 | 0.97022162000000 | T | T | T |
| 0.33086951300000 | 0.28402014900000 | 0.86741168500000 | T | T | T |
| 0.33086951300000 | 0.78402014900000 | 0.86741168500000 | T | T | T |
| 0.83086951300000 | 0.28402014900000 | 0.86741168500000 | T | T | T |
| 0.83086951300000 | 0.78402014900000 | 0.86741168500000 | T | T | T |
| 0.39826827000000 | 0.28979858000000 | 0.91814375500000 | T | T | T |
| 0.39826827000000 | 0.78979858000000 | 0.91814375500000 | T | T | T |
| 0.89826827000000 | 0.28979858000000 | 0.91814375500000 | T | T | T |
| 0.89826827000000 | 0.78979858000000 | 0.91814375500000 | T | T | T |
| 0.25489839700000 | 0.29198474200000 | 0.86466622300000 | T | T | T |
| 0.25489839700000 | 0.79198474200000 | 0.86466622300000 | T | T | T |
| 0.75489839700000 | 0.29198474200000 | 0.86466622300000 | T | T | T |

|                  |                  |                  |   |   |   |
|------------------|------------------|------------------|---|---|---|
| 0.75489839700000 | 0.79198474200000 | 0.86466622300000 | T | T | T |
| 0.28137536300000 | 0.23850706700000 | 0.86591718300000 | T | T | T |
| 0.28137536300000 | 0.73850706700000 | 0.86591718300000 | T | T | T |
| 0.78137536300000 | 0.23850706700000 | 0.86591718300000 | T | T | T |
| 0.78137536300000 | 0.73850706700000 | 0.86591718300000 | T | T | T |
| 0.18904065100000 | 0.34630711600000 | 0.87441261600000 | T | T | T |
| 0.18904065100000 | 0.84630711600000 | 0.87441261600000 | T | T | T |
| 0.68904065100000 | 0.34630711600000 | 0.87441261600000 | T | T | T |
| 0.68904065100000 | 0.84630711600000 | 0.87441261600000 | T | T | T |
| 0.18803042200000 | 0.30909079500000 | 0.91440403700000 | T | T | T |
| 0.18803042200000 | 0.80909079500000 | 0.91440403700000 | T | T | T |
| 0.68803042200000 | 0.30909079500000 | 0.91440403700000 | T | T | T |
| 0.68803042200000 | 0.80909079500000 | 0.91440403700000 | T | T | T |
| 0.39739251500000 | 0.33271139700000 | 0.88546248100000 | T | T | T |
| 0.39739251500000 | 0.83271139700000 | 0.88546248100000 | T | T | T |
| 0.89739251500000 | 0.33271139700000 | 0.88546248100000 | T | T | T |
| 0.89739251500000 | 0.83271139700000 | 0.88546248100000 | T | T | T |
| 0.27635295000000 | 0.18669757800000 | 0.91685373500000 | T | T | T |
| 0.27635295000000 | 0.68669757800000 | 0.91685373500000 | T | T | T |
| 0.77635295000000 | 0.18669757800000 | 0.91685373500000 | T | T | T |
| 0.77635295000000 | 0.68669757800000 | 0.91685373500000 | T | T | T |
| 0.22161613800000 | 0.18652979000000 | 0.88296185800000 | T | T | T |
| 0.22161613800000 | 0.68652979000000 | 0.88296185800000 | T | T | T |
| 0.72161613800000 | 0.18652979000000 | 0.88296185800000 | T | T | T |
| 0.72161613800000 | 0.68652979000000 | 0.88296185800000 | T | T | T |

#### 4) Large supercell FS

POSCAR

2.80638615913204

8.0000000000000000 0.0000000000000000 0.0000000000000000

0.000000000000000 10.39230484600000 0.000000000000000

0.000000000000000 0.000000000000000 9.97724418961000

Pt O H

384 32 80

Direct

0.49997569594200 0.49938301022600 0.99959468800500 T T T

0.49991345642200 0.99929425811600 0.99957743856600 T T T

0.00007616770092 0.49909208569700 0.99953115881500 T T T

0.99987409252000 0.99925609234600 0.99956632349700 T T T

0.49996972874800 0.16553380350400 0.99968650967300 T T T

0.49984641438100 0.66555971603300 0.99969829187400 T T T

0.99986118594000 0.16558379326900 0.99965652597600 T T T

0.99982533277500 0.66553150357300 0.99966677754700 T T T

0.49989140714300 0.33221890483200 0.99938259537900 T T T

0.49976586411500 0.83202200118100 0.99950168574900 T T T

0.00003475466672 0.33212196164900 0.99934174982700 T T T

0.99973477131800 0.83203282534700 0.99950906646900 T T T

0.12470393681700 0.49915008448400 0.99950068166100 T T T

0.12470849268400 0.99947352534400 0.99964919015400 T T T

0.62482537605400 0.49957618377900 0.99961617193700 T T T

0.62479796510000 0.99952335362100 0.99961544873300 T T T

0.12508984509000 0.16538139675000 0.99947328235200 T T T

0.12500920737100 0.66529957591800 0.99951866905400 T T T

0.62512315449600 0.16527464583000 0.99947886050500 T T T

0.62504132283400 0.66535504252800 0.99950989419800 T T T

0.12396621239200 0.33235169374700 0.00028884720661 T T T

0.12307569862100 0.83140136123800 0.99843244849000 T T T

0.62294697657900 0.33137800215500 0.99838515052100 T T T

0.62310023800200 0.83141306239500 0.99841895966000 T T T

0.25001864623800 0.49921056708800 0.99958578735500 T T T

|                  |                  |                  |   |   |   |
|------------------|------------------|------------------|---|---|---|
| 0.25031732260700 | 0.99944045331100 | 0.99965663713400 | T | T | T |
| 0.75026733607600 | 0.49957916886700 | 0.99957622476200 | T | T | T |
| 0.75029725171000 | 0.99948980154800 | 0.99965255309300 | T | T | T |
| 0.25029706206500 | 0.16507810572700 | 0.99907225036000 | T | T | T |
| 0.25039630940500 | 0.66536460343200 | 0.99929266399100 | T | T | T |
| 0.75037805845800 | 0.16529312864900 | 0.99925247140200 | T | T | T |
| 0.75039280247700 | 0.66537347840700 | 0.99927111765500 | T | T | T |
| 0.25005425736900 | 0.33201426850100 | 0.99698056142800 | T | T | T |
| 0.25202015418500 | 0.83147020069300 | 0.99860881912000 | T | T | T |
| 0.75203405123600 | 0.33146987572000 | 0.99866497681500 | T | T | T |
| 0.75202079463600 | 0.83150308022400 | 0.99861253253200 | T | T | T |
| 0.37530130572100 | 0.49911907577800 | 0.99942497181500 | T | T | T |
| 0.37527148651100 | 0.99919313955300 | 0.99952278085700 | T | T | T |
| 0.87526775627000 | 0.49924892472000 | 0.99961418078200 | T | T | T |
| 0.87525843362100 | 0.99924562512600 | 0.99958261474500 | T | T | T |
| 0.37510147823000 | 0.16535493087500 | 0.99938149182900 | T | T | T |
| 0.37517756263100 | 0.66546317621500 | 0.99940196756600 | T | T | T |
| 0.87511028454600 | 0.16544495475800 | 0.99945674826500 | T | T | T |
| 0.87517252595600 | 0.66548875628300 | 0.99941149717300 | T | T | T |
| 0.37597524689500 | 0.33218989214700 | 0.00029444091711 | T | T | T |
| 0.37537198079400 | 0.83213744270200 | 0.99963065754500 | T | T | T |
| 0.87559473296500 | 0.33221413753000 | 0.99964916173200 | T | T | T |
| 0.87534523103400 | 0.83216053437300 | 0.99961020728500 | T | T | T |
| 0.06245517117040 | 0.08257598941790 | 0.99958394169500 | T | T | T |
| 0.06258744305770 | 0.58236725216100 | 0.99959499338100 | T | T | T |
| 0.56254082184300 | 0.08249913682800 | 0.99950836230400 | T | T | T |
| 0.56257070775700 | 0.58261315968100 | 0.99957601065900 | T | T | T |
| 0.06231931464880 | 0.24873447729000 | 0.99957947420200 | T | T | T |
| 0.06235316843710 | 0.74851908845800 | 0.99967038535400 | T | T | T |
| 0.56247596206500 | 0.24845745694300 | 0.99964687418200 | T | T | T |

|                  |                  |                  |   |   |   |
|------------------|------------------|------------------|---|---|---|
| 0.56239376753100 | 0.74853832716000 | 0.99966893454500 | T | T | T |
| 0.06190066543680 | 0.41585913458200 | 0.99914404713900 | T | T | T |
| 0.06132947077180 | 0.91605737825400 | 0.00002219719569 | T | T | T |
| 0.56150397315500 | 0.41609056901900 | 0.00001153183970 | T | T | T |
| 0.56138451954700 | 0.91604659451700 | 0.00000649791901 | T | T | T |
| 0.18747143009000 | 0.08245597725080 | 0.99954293914600 | T | T | T |
| 0.18760908423900 | 0.58243691026300 | 0.99951241468300 | T | T | T |
| 0.68759886797300 | 0.08253966870910 | 0.99947891721400 | T | T | T |
| 0.68761967358900 | 0.58261624922500 | 0.99947328766400 | T | T | T |
| 0.18705094017400 | 0.24816563842900 | 0.00029179928082 | T | T | T |
| 0.18753815805300 | 0.74803953276600 | 0.99971607134000 | T | T | T |
| 0.68756132156100 | 0.24804619889100 | 0.99965277874100 | T | T | T |
| 0.68754355395800 | 0.74804988818700 | 0.99968835745700 | T | T | T |
| 0.18695109226600 | 0.41642269273900 | 0.00046427163235 | T | T | T |
| 0.18753869794300 | 0.91784835836700 | 0.99912168293300 | T | T | T |
| 0.68755867679200 | 0.41793626970000 | 0.99908954301600 | T | T | T |
| 0.68755055657200 | 0.91788175404300 | 0.99909319945600 | T | T | T |
| 0.31272230757700 | 0.08234682537340 | 0.99947820807800 | T | T | T |
| 0.31256509452900 | 0.58238841243400 | 0.99952291326500 | T | T | T |
| 0.81263347960200 | 0.08242027970890 | 0.99950661636600 | T | T | T |
| 0.81260149655700 | 0.58252028200500 | 0.99952165416100 | T | T | T |
| 0.31309113826400 | 0.24821971697300 | 0.00040369936180 | T | T | T |
| 0.31264093972900 | 0.74853496111200 | 0.99949463547300 | T | T | T |
| 0.81260118140800 | 0.24853447090800 | 0.99950890871000 | T | T | T |
| 0.81261815264200 | 0.74854672395500 | 0.99947602917500 | T | T | T |
| 0.31305059882600 | 0.41635739396600 | 0.00038292360085 | T | T | T |
| 0.31372862804100 | 0.91604725908700 | 0.99993524728400 | T | T | T |
| 0.81372884179400 | 0.41607714734800 | 0.99994891586700 | T | T | T |
| 0.81374557861100 | 0.91607817959000 | 0.99990969825900 | T | T | T |
| 0.43760390389200 | 0.08231716323520 | 0.99957707552200 | T | T | T |

|                  |                  |                  |   |   |   |
|------------------|------------------|------------------|---|---|---|
| 0.43750272153500 | 0.58223881448200 | 0.99959432627800 | T | T | T |
| 0.93754244870600 | 0.08227742322500 | 0.99954710654800 | T | T | T |
| 0.93750294047500 | 0.58228332588900 | 0.99957822092400 | T | T | T |
| 0.43773495190700 | 0.24868866320900 | 0.99922137176100 | T | T | T |
| 0.43747770502200 | 0.74872914729500 | 0.99927456085500 | T | T | T |
| 0.93752365629700 | 0.24872470918700 | 0.99923402916100 | T | T | T |
| 0.93745565040600 | 0.74876322840800 | 0.99926493344800 | T | T | T |
| 0.43768166188300 | 0.41586033512300 | 0.99919528688200 | T | T | T |
| 0.43754441082400 | 0.91566944436100 | 0.99946821399700 | T | T | T |
| 0.93785825901600 | 0.41559725321700 | 0.99951494241000 | T | T | T |
| 0.93747456418700 | 0.91565249332200 | 0.99946939190900 | T | T | T |
| 0.00000000000000 | 0.05555555600040 | 0.08183588199970 | F | F | F |
| 0.00000000000000 | 0.55555555600000 | 0.08183588199970 | F | F | F |
| 0.50000000000000 | 0.05555555600040 | 0.08183588199970 | F | F | F |
| 0.50000000000000 | 0.55555555600000 | 0.08183588199970 | F | F | F |
| 0.00000000000000 | 0.22222222200100 | 0.08183588199970 | F | F | F |
| 0.00000000000000 | 0.72222222200100 | 0.08183588199970 | F | F | F |
| 0.50000000000000 | 0.22222222200100 | 0.08183588199970 | F | F | F |
| 0.50000000000000 | 0.72222222200100 | 0.08183588199970 | F | F | F |
| 0.00000000000000 | 0.38888888900000 | 0.08183588199970 | F | F | F |
| 0.00000000000000 | 0.88888888900000 | 0.08183588199970 | F | F | F |
| 0.50000000000000 | 0.38888888900000 | 0.08183588199970 | F | F | F |
| 0.50000000000000 | 0.88888888900000 | 0.08183588199970 | F | F | F |
| 0.12500000000000 | 0.05555555600040 | 0.08183588199970 | F | F | F |
| 0.12500000000000 | 0.55555555600000 | 0.08183588199970 | F | F | F |
| 0.62500000000000 | 0.05555555600040 | 0.08183588199970 | F | F | F |
| 0.62500000000000 | 0.55555555600000 | 0.08183588199970 | F | F | F |
| 0.12500000000000 | 0.22222222200100 | 0.08183588199970 | F | F | F |
| 0.12500000000000 | 0.72222222200100 | 0.08183588199970 | F | F | F |
| 0.62500000000000 | 0.22222222200100 | 0.08183588199970 | F | F | F |

|                    |                   |                  |   |   |   |
|--------------------|-------------------|------------------|---|---|---|
| 0.6250000000000000 | 0.722222222200100 | 0.08183588199970 | F | F | F |
| 0.1250000000000000 | 0.38888888900000  | 0.08183588199970 | F | F | F |
| 0.1250000000000000 | 0.88888888900000  | 0.08183588199970 | F | F | F |
| 0.6250000000000000 | 0.38888888900000  | 0.08183588199970 | F | F | F |
| 0.6250000000000000 | 0.88888888900000  | 0.08183588199970 | F | F | F |
| 0.2500000000000000 | 0.05555555600040  | 0.08183588199970 | F | F | F |
| 0.2500000000000000 | 0.55555555600000  | 0.08183588199970 | F | F | F |
| 0.7500000000000000 | 0.05555555600040  | 0.08183588199970 | F | F | F |
| 0.7500000000000000 | 0.55555555600000  | 0.08183588199970 | F | F | F |
| 0.2500000000000000 | 0.22222222200100  | 0.08183588199970 | F | F | F |
| 0.2500000000000000 | 0.72222222200100  | 0.08183588199970 | F | F | F |
| 0.7500000000000000 | 0.22222222200100  | 0.08183588199970 | F | F | F |
| 0.7500000000000000 | 0.72222222200100  | 0.08183588199970 | F | F | F |
| 0.2500000000000000 | 0.38888888900000  | 0.08183588199970 | F | F | F |
| 0.2500000000000000 | 0.88888888900000  | 0.08183588199970 | F | F | F |
| 0.7500000000000000 | 0.38888888900000  | 0.08183588199970 | F | F | F |
| 0.7500000000000000 | 0.88888888900000  | 0.08183588199970 | F | F | F |
| 0.3750000000000000 | 0.05555555600040  | 0.08183588199970 | F | F | F |
| 0.3750000000000000 | 0.55555555600000  | 0.08183588199970 | F | F | F |
| 0.8750000000000000 | 0.05555555600040  | 0.08183588199970 | F | F | F |
| 0.8750000000000000 | 0.55555555600000  | 0.08183588199970 | F | F | F |
| 0.3750000000000000 | 0.22222222200100  | 0.08183588199970 | F | F | F |
| 0.3750000000000000 | 0.72222222200100  | 0.08183588199970 | F | F | F |
| 0.8750000000000000 | 0.22222222200100  | 0.08183588199970 | F | F | F |
| 0.8750000000000000 | 0.72222222200100  | 0.08183588199970 | F | F | F |
| 0.3750000000000000 | 0.38888888900000  | 0.08183588199970 | F | F | F |
| 0.3750000000000000 | 0.88888888900000  | 0.08183588199970 | F | F | F |
| 0.8750000000000000 | 0.38888888900000  | 0.08183588199970 | F | F | F |
| 0.8750000000000000 | 0.88888888900000  | 0.08183588199970 | F | F | F |
| 0.0625000000000000 | 0.13888888900000  | 0.08183588199970 | F | F | F |

|                  |                  |                  |   |   |   |
|------------------|------------------|------------------|---|---|---|
| 0.06250000000000 | 0.63888888900000 | 0.08183588199970 | F | F | F |
| 0.56250000000000 | 0.13888888900000 | 0.08183588199970 | F | F | F |
| 0.56250000000000 | 0.63888888900000 | 0.08183588199970 | F | F | F |
| 0.06250000000000 | 0.30555555600000 | 0.08183588199970 | F | F | F |
| 0.06250000000000 | 0.80555555600000 | 0.08183588199970 | F | F | F |
| 0.56250000000000 | 0.30555555600000 | 0.08183588199970 | F | F | F |
| 0.56250000000000 | 0.80555555600000 | 0.08183588199970 | F | F | F |
| 0.06250000000000 | 0.47222222200100 | 0.08183588199970 | F | F | F |
| 0.06250000000000 | 0.97222222200100 | 0.08183588199970 | F | F | F |
| 0.56250000000000 | 0.47222222200100 | 0.08183588199970 | F | F | F |
| 0.56250000000000 | 0.97222222200100 | 0.08183588199970 | F | F | F |
| 0.18750000000000 | 0.13888888900000 | 0.08183588199970 | F | F | F |
| 0.18750000000000 | 0.63888888900000 | 0.08183588199970 | F | F | F |
| 0.68750000000000 | 0.13888888900000 | 0.08183588199970 | F | F | F |
| 0.68750000000000 | 0.63888888900000 | 0.08183588199970 | F | F | F |
| 0.18750000000000 | 0.30555555600000 | 0.08183588199970 | F | F | F |
| 0.18750000000000 | 0.80555555600000 | 0.08183588199970 | F | F | F |
| 0.68750000000000 | 0.30555555600000 | 0.08183588199970 | F | F | F |
| 0.68750000000000 | 0.80555555600000 | 0.08183588199970 | F | F | F |
| 0.18750000000000 | 0.47222222200100 | 0.08183588199970 | F | F | F |
| 0.18750000000000 | 0.97222222200100 | 0.08183588199970 | F | F | F |
| 0.68750000000000 | 0.47222222200100 | 0.08183588199970 | F | F | F |
| 0.68750000000000 | 0.97222222200100 | 0.08183588199970 | F | F | F |
| 0.31250000000000 | 0.13888888900000 | 0.08183588199970 | F | F | F |
| 0.31250000000000 | 0.63888888900000 | 0.08183588199970 | F | F | F |
| 0.81250000000000 | 0.13888888900000 | 0.08183588199970 | F | F | F |
| 0.81250000000000 | 0.63888888900000 | 0.08183588199970 | F | F | F |
| 0.31250000000000 | 0.30555555600000 | 0.08183588199970 | F | F | F |
| 0.31250000000000 | 0.80555555600000 | 0.08183588199970 | F | F | F |
| 0.81250000000000 | 0.30555555600000 | 0.08183588199970 | F | F | F |



|                    |                  |                  |   |   |   |
|--------------------|------------------|------------------|---|---|---|
| 0.8125000000000000 | 0.80555555600000 | 0.08183588199970 | F | F | F |
| 0.3125000000000000 | 0.47222222200100 | 0.08183588199970 | F | F | F |
| 0.3125000000000000 | 0.97222222200100 | 0.08183588199970 | F | F | F |
| 0.8125000000000000 | 0.47222222200100 | 0.08183588199970 | F | F | F |
| 0.8125000000000000 | 0.97222222200100 | 0.08183588199970 | F | F | F |
| 0.4375000000000000 | 0.13888888900000 | 0.08183588199970 | F | F | F |
| 0.4375000000000000 | 0.63888888900000 | 0.08183588199970 | F | F | F |
| 0.9375000000000000 | 0.13888888900000 | 0.08183588199970 | F | F | F |
| 0.9375000000000000 | 0.63888888900000 | 0.08183588199970 | F | F | F |
| 0.4375000000000000 | 0.30555555600000 | 0.08183588199970 | F | F | F |
| 0.4375000000000000 | 0.80555555600000 | 0.08183588199970 | F | F | F |
| 0.9375000000000000 | 0.30555555600000 | 0.08183588199970 | F | F | F |
| 0.9375000000000000 | 0.80555555600000 | 0.08183588199970 | F | F | F |
| 0.4375000000000000 | 0.47222222200100 | 0.08183588199970 | F | F | F |
| 0.4375000000000000 | 0.97222222200100 | 0.08183588199970 | F | F | F |
| 0.9375000000000000 | 0.47222222200100 | 0.08183588199970 | F | F | F |
| 0.9375000000000000 | 0.97222222200100 | 0.08183588199970 | F | F | F |
| 0.0625000000000000 | 0.02777777799930 | 0.16367176500000 | F | F | F |
| 0.0625000000000000 | 0.52777777799900 | 0.16367176500000 | F | F | F |
| 0.5625000000000000 | 0.02777777799930 | 0.16367176500000 | F | F | F |
| 0.5625000000000000 | 0.52777777799900 | 0.16367176500000 | F | F | F |
| 0.0625000000000000 | 0.19444444500000 | 0.16367176500000 | F | F | F |
| 0.0625000000000000 | 0.69444444500000 | 0.16367176500000 | F | F | F |
| 0.5625000000000000 | 0.19444444500000 | 0.16367176500000 | F | F | F |
| 0.5625000000000000 | 0.69444444500000 | 0.16367176500000 | F | F | F |
| 0.0625000000000000 | 0.36111111100000 | 0.16367176500000 | F | F | F |
| 0.0625000000000000 | 0.86111111100000 | 0.16367176500000 | F | F | F |
| 0.5625000000000000 | 0.36111111100000 | 0.16367176500000 | F | F | F |
| 0.5625000000000000 | 0.86111111100000 | 0.16367176500000 | F | F | F |
| 0.1875000000000000 | 0.02777777799930 | 0.16367176500000 | F | F | F |

|                  |                  |                  |   |   |   |
|------------------|------------------|------------------|---|---|---|
| 0.18750000000000 | 0.52777777799900 | 0.16367176500000 | F | F | F |
| 0.68750000000000 | 0.02777777799930 | 0.16367176500000 | F | F | F |
| 0.68750000000000 | 0.52777777799900 | 0.16367176500000 | F | F | F |
| 0.18750000000000 | 0.19444444500000 | 0.16367176500000 | F | F | F |
| 0.18750000000000 | 0.69444444500000 | 0.16367176500000 | F | F | F |
| 0.68750000000000 | 0.19444444500000 | 0.16367176500000 | F | F | F |
| 0.68750000000000 | 0.69444444500000 | 0.16367176500000 | F | F | F |
| 0.18750000000000 | 0.36111111100000 | 0.16367176500000 | F | F | F |
| 0.18750000000000 | 0.86111111100000 | 0.16367176500000 | F | F | F |
| 0.68750000000000 | 0.36111111100000 | 0.16367176500000 | F | F | F |
| 0.68750000000000 | 0.86111111100000 | 0.16367176500000 | F | F | F |
| 0.31250000000000 | 0.02777777799930 | 0.16367176500000 | F | F | F |
| 0.31250000000000 | 0.52777777799900 | 0.16367176500000 | F | F | F |
| 0.81250000000000 | 0.02777777799930 | 0.16367176500000 | F | F | F |
| 0.81250000000000 | 0.52777777799900 | 0.16367176500000 | F | F | F |
| 0.31250000000000 | 0.19444444500000 | 0.16367176500000 | F | F | F |
| 0.31250000000000 | 0.69444444500000 | 0.16367176500000 | F | F | F |
| 0.81250000000000 | 0.19444444500000 | 0.16367176500000 | F | F | F |
| 0.81250000000000 | 0.69444444500000 | 0.16367176500000 | F | F | F |
| 0.31250000000000 | 0.36111111100000 | 0.16367176500000 | F | F | F |
| 0.31250000000000 | 0.86111111100000 | 0.16367176500000 | F | F | F |
| 0.81250000000000 | 0.36111111100000 | 0.16367176500000 | F | F | F |
| 0.81250000000000 | 0.86111111100000 | 0.16367176500000 | F | F | F |
| 0.43750000000000 | 0.02777777799930 | 0.16367176500000 | F | F | F |
| 0.43750000000000 | 0.52777777799900 | 0.16367176500000 | F | F | F |
| 0.93750000000000 | 0.02777777799930 | 0.16367176500000 | F | F | F |
| 0.93750000000000 | 0.52777777799900 | 0.16367176500000 | F | F | F |
| 0.43750000000000 | 0.19444444500000 | 0.16367176500000 | F | F | F |
| 0.43750000000000 | 0.69444444500000 | 0.16367176500000 | F | F | F |
| 0.93750000000000 | 0.19444444500000 | 0.16367176500000 | F | F | F |

|                    |                   |                  |   |   |   |
|--------------------|-------------------|------------------|---|---|---|
| 0.9375000000000000 | 0.694444444500000 | 0.16367176500000 | F | F | F |
| 0.4375000000000000 | 0.36111111100000  | 0.16367176500000 | F | F | F |
| 0.4375000000000000 | 0.86111111100000  | 0.16367176500000 | F | F | F |
| 0.9375000000000000 | 0.36111111100000  | 0.16367176500000 | F | F | F |
| 0.9375000000000000 | 0.86111111100000  | 0.16367176500000 | F | F | F |
| 0.0000000000000000 | 0.11111111100000  | 0.16367176500000 | F | F | F |
| 0.0000000000000000 | 0.61111111100000  | 0.16367176500000 | F | F | F |
| 0.5000000000000000 | 0.11111111100000  | 0.16367176500000 | F | F | F |
| 0.5000000000000000 | 0.61111111100000  | 0.16367176500000 | F | F | F |
| 0.0000000000000000 | 0.27777777799900  | 0.16367176500000 | F | F | F |
| 0.0000000000000000 | 0.77777777799900  | 0.16367176500000 | F | F | F |
| 0.5000000000000000 | 0.27777777799900  | 0.16367176500000 | F | F | F |
| 0.5000000000000000 | 0.77777777799900  | 0.16367176500000 | F | F | F |
| 0.0000000000000000 | 0.444444444500000 | 0.16367176500000 | F | F | F |
| 0.0000000000000000 | 0.944444444500000 | 0.16367176500000 | F | F | F |
| 0.5000000000000000 | 0.444444444500000 | 0.16367176500000 | F | F | F |
| 0.5000000000000000 | 0.944444444500000 | 0.16367176500000 | F | F | F |
| 0.1250000000000000 | 0.11111111100000  | 0.16367176500000 | F | F | F |
| 0.1250000000000000 | 0.61111111100000  | 0.16367176500000 | F | F | F |
| 0.6250000000000000 | 0.11111111100000  | 0.16367176500000 | F | F | F |
| 0.6250000000000000 | 0.61111111100000  | 0.16367176500000 | F | F | F |
| 0.1250000000000000 | 0.27777777799900  | 0.16367176500000 | F | F | F |
| 0.1250000000000000 | 0.77777777799900  | 0.16367176500000 | F | F | F |
| 0.6250000000000000 | 0.27777777799900  | 0.16367176500000 | F | F | F |
| 0.6250000000000000 | 0.77777777799900  | 0.16367176500000 | F | F | F |
| 0.1250000000000000 | 0.444444444500000 | 0.16367176500000 | F | F | F |
| 0.1250000000000000 | 0.944444444500000 | 0.16367176500000 | F | F | F |
| 0.6250000000000000 | 0.444444444500000 | 0.16367176500000 | F | F | F |
| 0.6250000000000000 | 0.944444444500000 | 0.16367176500000 | F | F | F |
| 0.2500000000000000 | 0.11111111100000  | 0.16367176500000 | F | F | F |

|                    |                   |                  |   |   |   |
|--------------------|-------------------|------------------|---|---|---|
| 0.2500000000000000 | 0.611111111100000 | 0.16367176500000 | F | F | F |
| 0.7500000000000000 | 0.111111111100000 | 0.16367176500000 | F | F | F |
| 0.7500000000000000 | 0.611111111100000 | 0.16367176500000 | F | F | F |
| 0.2500000000000000 | 0.27777777799900  | 0.16367176500000 | F | F | F |
| 0.2500000000000000 | 0.77777777799900  | 0.16367176500000 | F | F | F |
| 0.7500000000000000 | 0.27777777799900  | 0.16367176500000 | F | F | F |
| 0.7500000000000000 | 0.77777777799900  | 0.16367176500000 | F | F | F |
| 0.2500000000000000 | 0.44444444500000  | 0.16367176500000 | F | F | F |
| 0.2500000000000000 | 0.94444444500000  | 0.16367176500000 | F | F | F |
| 0.7500000000000000 | 0.44444444500000  | 0.16367176500000 | F | F | F |
| 0.7500000000000000 | 0.94444444500000  | 0.16367176500000 | F | F | F |
| 0.3750000000000000 | 0.111111111100000 | 0.16367176500000 | F | F | F |
| 0.3750000000000000 | 0.611111111100000 | 0.16367176500000 | F | F | F |
| 0.8750000000000000 | 0.111111111100000 | 0.16367176500000 | F | F | F |
| 0.8750000000000000 | 0.611111111100000 | 0.16367176500000 | F | F | F |
| 0.3750000000000000 | 0.27777777799900  | 0.16367176500000 | F | F | F |
| 0.3750000000000000 | 0.77777777799900  | 0.16367176500000 | F | F | F |
| 0.8750000000000000 | 0.27777777799900  | 0.16367176500000 | F | F | F |
| 0.8750000000000000 | 0.77777777799900  | 0.16367176500000 | F | F | F |
| 0.3750000000000000 | 0.44444444500000  | 0.16367176500000 | F | F | F |
| 0.3750000000000000 | 0.94444444500000  | 0.16367176500000 | F | F | F |
| 0.8750000000000000 | 0.44444444500000  | 0.16367176500000 | F | F | F |
| 0.8750000000000000 | 0.94444444500000  | 0.16367176500000 | F | F | F |
| 0.49997003011700   | 0.00163555705701  | 0.24597529588500 | T | T | T |
| 0.49999058617600   | 0.50163011852700  | 0.24595702521100 | T | T | T |
| 0.99990567571500   | 0.00161292492917  | 0.24596591639900 | T | T | T |
| 0.00009029304908   | 0.50144890808500  | 0.24594553703500 | T | T | T |
| 0.49996490912100   | 0.16785412256500  | 0.24584823429400 | T | T | T |
| 0.49985011858400   | 0.66796631668600  | 0.24586771012100 | T | T | T |
| 0.99978563433300   | 0.16792261771700  | 0.24592305101500 | T | T | T |

|                  |                  |                  |   |   |   |
|------------------|------------------|------------------|---|---|---|
| 0.99986846576200 | 0.66796260122800 | 0.24589550644200 | T | T | T |
| 0.50003357766700 | 0.33460020085000 | 0.24601092723400 | T | T | T |
| 0.49984030641800 | 0.83461884289200 | 0.24589064409300 | T | T | T |
| 0.99991573083100 | 0.33456810901100 | 0.24613833297900 | T | T | T |
| 0.99977821256200 | 0.83463185162200 | 0.24587892242500 | T | T | T |
| 0.12473611904400 | 0.00169280368196 | 0.24583985250800 | T | T | T |
| 0.12504805359500 | 0.50155969645800 | 0.24597197923600 | T | T | T |
| 0.62483282455000 | 0.00170664557534 | 0.24584215798900 | T | T | T |
| 0.62482629492200 | 0.50173477145500 | 0.24587304355300 | T | T | T |
| 0.12474863753100 | 0.16784997739700 | 0.24613636122500 | T | T | T |
| 0.12499300935000 | 0.66779439074500 | 0.24599587088100 | T | T | T |
| 0.62505518518900 | 0.16776154974300 | 0.24601909871700 | T | T | T |
| 0.62501312048300 | 0.66782994228300 | 0.24605138629000 | T | T | T |
| 0.12393921572400 | 0.33453775918300 | 0.24517111995700 | T | T | T |
| 0.12362121888700 | 0.83390113772200 | 0.24751164902600 | T | T | T |
| 0.62347308306400 | 0.33386606025800 | 0.24755458393400 | T | T | T |
| 0.62365902451100 | 0.83389161430900 | 0.24753845493300 | T | T | T |
| 0.25026011829500 | 0.00165313360082 | 0.24582155889300 | T | T | T |
| 0.24999440310100 | 0.50182136496300 | 0.24608824498100 | T | T | T |
| 0.75024644321000 | 0.00169669301554 | 0.24579590939900 | T | T | T |
| 0.75021510976900 | 0.50172795756100 | 0.24585036446400 | T | T | T |
| 0.25019124302400 | 0.16757032744500 | 0.24624028416200 | T | T | T |
| 0.25033344320400 | 0.66777548124300 | 0.24636650964200 | T | T | T |
| 0.75032787548400 | 0.16770280542400 | 0.24645106764500 | T | T | T |
| 0.75033040353100 | 0.66779245726500 | 0.24642859013700 | T | T | T |
| 0.25012491298100 | 0.33438758187900 | 0.24863572206800 | T | T | T |
| 0.25156700570300 | 0.83400847274800 | 0.24725844287700 | T | T | T |
| 0.75158482743100 | 0.33395745859400 | 0.24718589582300 | T | T | T |
| 0.75160114954200 | 0.83400721905500 | 0.24727914235000 | T | T | T |
| 0.37514576852300 | 0.00163327870616 | 0.24601017653700 | T | T | T |

|                  |                  |                  |   |   |   |
|------------------|------------------|------------------|---|---|---|
| 0.37498149625000 | 0.50160447588800 | 0.24605058307000 | T | T | T |
| 0.87513031915600 | 0.00161835742076 | 0.24596997813700 | T | T | T |
| 0.87515611671000 | 0.50164637262000 | 0.24595090575100 | T | T | T |
| 0.37546522538400 | 0.16790112139800 | 0.24618945664500 | T | T | T |
| 0.37518845297900 | 0.66799772882900 | 0.24611081595300 | T | T | T |
| 0.87512386997900 | 0.16793458059600 | 0.24602741758000 | T | T | T |
| 0.87519459615300 | 0.66799758334400 | 0.24610084829600 | T | T | T |
| 0.37603190711300 | 0.33459317452600 | 0.24514756450200 | T | T | T |
| 0.37522074401500 | 0.83481781566200 | 0.24572317890000 | T | T | T |
| 0.87541826975000 | 0.33488404325900 | 0.24569278042800 | T | T | T |
| 0.87518365561200 | 0.83483652676200 | 0.24574912211500 | T | T | T |
| 0.06251687433370 | 0.08478180474910 | 0.24592070982300 | T | T | T |
| 0.06254139875700 | 0.58467320942700 | 0.24590699613500 | T | T | T |
| 0.56259595338800 | 0.08474361324990 | 0.24592275252900 | T | T | T |
| 0.56250884550600 | 0.58482164186300 | 0.24595040578100 | T | T | T |
| 0.06184433432040 | 0.25107630340000 | 0.24623636289800 | T | T | T |
| 0.06229121284270 | 0.75109821525400 | 0.24579634674300 | T | T | T |
| 0.56250062644700 | 0.25101416583700 | 0.24582725225900 | T | T | T |
| 0.56233614637700 | 0.75108121954900 | 0.24578107033200 | T | T | T |
| 0.06229877056090 | 0.41817590705800 | 0.24614337669500 | T | T | T |
| 0.06157308193220 | 0.91837257162100 | 0.24550561379000 | T | T | T |
| 0.56165976281900 | 0.41841488904700 | 0.24551809801700 | T | T | T |
| 0.56163309754400 | 0.91835473077500 | 0.24551916112100 | T | T | T |
| 0.18757131894000 | 0.08485869986170 | 0.24605654112400 | T | T | T |
| 0.18752523511500 | 0.58485306480400 | 0.24602396417800 | T | T | T |
| 0.68764221086200 | 0.08490901410900 | 0.24606341640500 | T | T | T |
| 0.68758496449100 | 0.58498209167900 | 0.24602886896400 | T | T | T |
| 0.18703519923600 | 0.25037669924300 | 0.24517266623700 | T | T | T |
| 0.18750548057900 | 0.75041044703800 | 0.24566026946100 | T | T | T |
| 0.68750910659000 | 0.25037352026800 | 0.24569834994700 | T | T | T |

|                  |                  |                  |   |   |   |
|------------------|------------------|------------------|---|---|---|
| 0.68750671268300 | 0.75040248596400 | 0.24571622747000 | T | T | T |
| 0.18701712172000 | 0.41860208869000 | 0.24504693868900 | T | T | T |
| 0.18749248524600 | 0.91983418091000 | 0.24703819958400 | T | T | T |
| 0.68753182733600 | 0.41985798793800 | 0.24713862806100 | T | T | T |
| 0.68754545704600 | 0.91982174931000 | 0.24702323780900 | T | T | T |
| 0.31252645213100 | 0.08472340348420 | 0.24602775343500 | T | T | T |
| 0.31256382247500 | 0.58482146503300 | 0.24598039385800 | T | T | T |
| 0.81246944534700 | 0.08475640612720 | 0.24596222449800 | T | T | T |
| 0.81252492784200 | 0.58484730927800 | 0.24597398693900 | T | T | T |
| 0.31316621918900 | 0.25050712484500 | 0.24506707263400 | T | T | T |
| 0.31272452899000 | 0.75108859466400 | 0.24584458503000 | T | T | T |
| 0.81266467222900 | 0.25105891989900 | 0.24581984027800 | T | T | T |
| 0.81272418930300 | 0.75107595171700 | 0.24585511333100 | T | T | T |
| 0.31309446586300 | 0.41865338078800 | 0.24518552873700 | T | T | T |
| 0.31345466145900 | 0.91843937186900 | 0.24560076358700 | T | T | T |
| 0.81342487264700 | 0.41843891342300 | 0.24561026176700 | T | T | T |
| 0.81347432581400 | 0.91843415615400 | 0.24561075099900 | T | T | T |
| 0.43750743952600 | 0.08469044901530 | 0.24589335702900 | T | T | T |
| 0.43753043525800 | 0.58464004668100 | 0.24586643574100 | T | T | T |
| 0.93743135441200 | 0.08463768191830 | 0.24587859993800 | T | T | T |
| 0.93755603046400 | 0.58468773641300 | 0.24591367392400 | T | T | T |
| 0.43802745890000 | 0.25104279836000 | 0.24668388713100 | T | T | T |
| 0.43747330257500 | 0.75121353969200 | 0.24642872303100 | T | T | T |
| 0.93748913698000 | 0.25126189933700 | 0.24642950862800 | T | T | T |
| 0.93745732785400 | 0.75125762996400 | 0.24644053455000 | T | T | T |
| 0.43745188614400 | 0.41811903348400 | 0.24611182388500 | T | T | T |
| 0.43758432076100 | 0.91808540703100 | 0.24608520032100 | T | T | T |
| 0.93784099239800 | 0.41812152161700 | 0.24605214121100 | T | T | T |
| 0.93753399044100 | 0.91807249543700 | 0.24606869861600 | T | T | T |
| 0.41028512503600 | 0.29440681482100 | 0.88210982299200 | T | T | T |

|                  |                  |                  |   |   |   |
|------------------|------------------|------------------|---|---|---|
| 0.39101441834000 | 0.79940781131600 | 0.88457951307800 | T | T | T |
| 0.89097751374200 | 0.29940309966800 | 0.88458130590700 | T | T | T |
| 0.89101057021600 | 0.79940943927600 | 0.88458181741400 | T | T | T |
| 0.29486530226300 | 0.27839686216000 | 0.87184333896500 | T | T | T |
| 0.29041498744900 | 0.77195283719000 | 0.85353296745300 | T | T | T |
| 0.79040130764100 | 0.27195255541700 | 0.85352873203900 | T | T | T |
| 0.79041004778400 | 0.77195310521100 | 0.85354194748600 | T | T | T |
| 0.24807651796000 | 0.33546075186200 | 0.92206916055000 | T | T | T |
| 0.19599634490400 | 0.81357594330600 | 0.87987201433200 | T | T | T |
| 0.69601294488500 | 0.31357125378100 | 0.87988221585000 | T | T | T |
| 0.69600485649300 | 0.81358026579400 | 0.87987637088900 | T | T | T |
| 0.27104116237900 | 0.18987019294800 | 0.88205566905600 | T | T | T |
| 0.26499335697400 | 0.69207495006100 | 0.88294953538600 | T | T | T |
| 0.76497741226000 | 0.19202956618700 | 0.88294857073800 | T | T | T |
| 0.76498650945200 | 0.69205855703600 | 0.88294939243700 | T | T | T |
| 0.41027806894800 | 0.29237963408600 | 0.36343167832600 | T | T | T |
| 0.39025054430700 | 0.79940884633800 | 0.35938590789700 | T | T | T |
| 0.89018356158000 | 0.29939716863600 | 0.35938537885600 | T | T | T |
| 0.89023907357700 | 0.79941455188200 | 0.35938481523400 | T | T | T |
| 0.29432745344000 | 0.28006580718200 | 0.37300119665700 | T | T | T |
| 0.29067837505800 | 0.76899015792100 | 0.39074482812700 | T | T | T |
| 0.79065716880800 | 0.26897618199800 | 0.39075014690700 | T | T | T |
| 0.79067023485500 | 0.76899023012100 | 0.39073259470100 | T | T | T |
| 0.24814066818100 | 0.33793841031600 | 0.32347703082000 | T | T | T |
| 0.19228972846200 | 0.80629039070200 | 0.36578146322100 | T | T | T |
| 0.69227145886800 | 0.30628366103400 | 0.36578246277200 | T | T | T |
| 0.69229123961000 | 0.80629204147900 | 0.36577673904000 | T | T | T |
| 0.27030114499300 | 0.19217424863100 | 0.36296306220000 | T | T | T |
| 0.26860071361400 | 0.68838326176600 | 0.36263824645100 | T | T | T |
| 0.76859357826900 | 0.18836197098200 | 0.36265415633000 | T | T | T |



|                  |                  |                  |   |   |   |
|------------------|------------------|------------------|---|---|---|
| 0.76859246163700 | 0.68837016461600 | 0.36263340426900 | T | T | T |
| 0.09890548489500 | 0.40222749027800 | 0.38388133466200 | T | T | T |
| 0.18723421220100 | 0.86346357035900 | 0.27681589439100 | T | T | T |
| 0.68732048285700 | 0.36338268374700 | 0.27673408411600 | T | T | T |
| 0.68723391849800 | 0.86344575048500 | 0.27683684612100 | T | T | T |
| 0.33908341393300 | 0.28390700070300 | 0.37040505496000 | T | T | T |
| 0.33045382795000 | 0.78194256136200 | 0.37649810949100 | T | T | T |
| 0.83044901455800 | 0.28194222435400 | 0.37649760055200 | T | T | T |
| 0.83045948916300 | 0.78194826992500 | 0.37648678239000 | T | T | T |
| 0.42258897077100 | 0.28005661397300 | 0.33194092618400 | T | T | T |
| 0.40541898336700 | 0.78056075181900 | 0.33255992425900 | T | T | T |
| 0.90546235447500 | 0.28057551139300 | 0.33257115128600 | T | T | T |
| 0.90541301838400 | 0.78056478294100 | 0.33256236433000 | T | T | T |
| 0.26956633823000 | 0.30747656013400 | 0.34582887357600 | T | T | T |
| 0.25383416864900 | 0.78779357034100 | 0.38003773956000 | T | T | T |
| 0.75383010511700 | 0.28777493274900 | 0.38005551947800 | T | T | T |
| 0.75383334197800 | 0.78779439522000 | 0.38002628378200 | T | T | T |
| 0.28405295987100 | 0.24657648020800 | 0.36811157032900 | T | T | T |
| 0.28293196096600 | 0.73516910721600 | 0.37885410220400 | T | T | T |
| 0.78292935723200 | 0.23515403338500 | 0.37886182895900 | T | T | T |
| 0.78293540774200 | 0.73517480909500 | 0.37884680619300 | T | T | T |
| 0.20615457225500 | 0.34115204413500 | 0.33228007490100 | T | T | T |
| 0.18085601857600 | 0.83764874260000 | 0.37411196874600 | T | T | T |
| 0.68090450388600 | 0.33766020683400 | 0.37411044975100 | T | T | T |
| 0.68085149883100 | 0.83764397896700 | 0.37410372698900 | T | T | T |
| 0.09841475660400 | 0.40720034903000 | 0.35737739183800 | T | T | T |
| 0.18417171830700 | 0.80341442470500 | 0.33118687673500 | T | T | T |
| 0.68419421834200 | 0.30342959449000 | 0.33117775112200 | T | T | T |
| 0.68417065628300 | 0.80342067964800 | 0.33117412190800 | T | T | T |
| 0.42096244748300 | 0.32488530542000 | 0.36151315136000 | T | T | T |

|                  |                  |                  |   |   |   |
|------------------|------------------|------------------|---|---|---|
| 0.38749019603400 | 0.82997702969300 | 0.34459884918200 | T | T | T |
| 0.88757272864200 | 0.33001166007300 | 0.34467549797200 | T | T | T |
| 0.88746993910000 | 0.82997667139400 | 0.34458213725400 | T | T | T |
| 0.27603859894800 | 0.18212783445900 | 0.32938528548400 | T | T | T |
| 0.27437542449600 | 0.68386811648000 | 0.32754778454000 | T | T | T |
| 0.77433796771000 | 0.18383977677000 | 0.32754018424800 | T | T | T |
| 0.77435935783200 | 0.68386850513600 | 0.32753009318000 | T | T | T |
| 0.22964118697900 | 0.18256319287800 | 0.37060096899500 | T | T | T |
| 0.22735350129000 | 0.67896672537700 | 0.36834797639900 | T | T | T |
| 0.72731047782100 | 0.17899278786100 | 0.36834260136800 | T | T | T |
| 0.72732428825000 | 0.67899662560500 | 0.36831239945900 | T | T | T |
| 0.09678450264310 | 0.40481677803700 | 0.85945873912700 | T | T | T |
| 0.18709071123200 | 0.86147525480900 | 0.97016711316800 | T | T | T |
| 0.68720585690600 | 0.36141623266800 | 0.97025165354300 | T | T | T |
| 0.68709450975100 | 0.86146093639600 | 0.97015047961200 | T | T | T |
| 0.33934051088300 | 0.28323140989600 | 0.87452688748300 | T | T | T |
| 0.33085766901800 | 0.78402232091800 | 0.86736922325800 | T | T | T |
| 0.83085835558600 | 0.28403753807900 | 0.86736940518700 | T | T | T |
| 0.83086133501700 | 0.78402535956200 | 0.86737869891200 | T | T | T |
| 0.42291255893800 | 0.28368670439300 | 0.91406554437400 | T | T | T |
| 0.39829413508100 | 0.78963392954600 | 0.91811947239300 | T | T | T |
| 0.89830622215900 | 0.28964466496200 | 0.91811691672300 | T | T | T |
| 0.89828160169000 | 0.78963050463000 | 0.91812002713500 | T | T | T |
| 0.26936724572700 | 0.30556084786000 | 0.89957436081000 | T | T | T |
| 0.25485907011900 | 0.79199956245000 | 0.86463170266800 | T | T | T |
| 0.75484147306100 | 0.29200106437700 | 0.86462167523900 | T | T | T |
| 0.75485710745100 | 0.79200034213300 | 0.86464234619300 | T | T | T |
| 0.28551667877000 | 0.24481984992800 | 0.87664661263500 | T | T | T |
| 0.28149182484400 | 0.73847665720500 | 0.86584042976300 | T | T | T |
| 0.78150522436700 | 0.23849335157500 | 0.86582461958400 | T | T | T |

|                  |                  |                  |   |   |   |
|------------------|------------------|------------------|---|---|---|
| 0.78149389765700 | 0.73847966631600 | 0.86584994077100 | T | T | T |
| 0.20620402882900 | 0.33910548551300 | 0.91314586682600 | T | T | T |
| 0.18915657859300 | 0.84631564513100 | 0.87452128774900 | T | T | T |
| 0.68914048194800 | 0.34630556180700 | 0.87449003941400 | T | T | T |
| 0.68915089251700 | 0.84631082450800 | 0.87452903591000 | T | T | T |
| 0.09558401609080 | 0.40977135076200 | 0.88594036388100 | T | T | T |
| 0.18787276377500 | 0.80879298900600 | 0.91428598462800 | T | T | T |
| 0.68790033586900 | 0.30880682936300 | 0.91428980638700 | T | T | T |
| 0.68786506245500 | 0.80879019832900 | 0.91429432841800 | T | T | T |
| 0.41958440275200 | 0.32719582561900 | 0.88250660971700 | T | T | T |
| 0.39742326084700 | 0.83262293794700 | 0.88555604322700 | T | T | T |
| 0.89752004967800 | 0.33260783258500 | 0.88548365809900 | T | T | T |
| 0.89741408604700 | 0.83261766922200 | 0.88556567898600 | T | T | T |
| 0.27783441812300 | 0.17997276727300 | 0.91550758141200 | T | T | T |
| 0.27647052125600 | 0.68665571699400 | 0.91688953362500 | T | T | T |
| 0.77644363845600 | 0.18664222792500 | 0.91688953244100 | T | T | T |
| 0.77646853119400 | 0.68664636857900 | 0.91689566412500 | T | T | T |
| 0.22965866128400 | 0.18128699556500 | 0.87575125034300 | T | T | T |
| 0.22201155401400 | 0.68617968559100 | 0.88268027523900 | T | T | T |
| 0.72197993490500 | 0.18621199020200 | 0.88270642957000 | T | T | T |
| 0.72199190148100 | 0.68620958845000 | 0.88272031826100 | T | T | T |

**B. Hydrogen evolution reaction step  $H^+_{sol} + H^* + e^- \rightarrow H_2$  on the semiconductor**

**GaP surface**

**1) Small supercell 1- $H^+_{sol}$  IS**

POSCAR

1

|                   |                   |                  |
|-------------------|-------------------|------------------|
| 15.60575999998655 | 0.00000000000000  | 0.00000000000000 |
| 0.00000000000000  | 16.55240999999278 | 0.00000000000000 |

0.000000000000000 0.000000000000000 30.38812199999634

Ga P H O

60 60 20 8

Direct

|                  |                  |                  |   |   |   |
|------------------|------------------|------------------|---|---|---|
| 0.38010933820700 | 0.16929154200000 | 0.06514972512860 | T | T | T |
| 0.37483937071400 | 0.83182270759700 | 0.06484415996200 | T | T | T |
| 0.37511831856800 | 0.49093236602700 | 0.06322957412730 | T | T | T |
| 0.87529527009400 | 0.16470079864100 | 0.06450871929520 | T | T | T |
| 0.87491317069700 | 0.83180657857500 | 0.06447545210130 | T | T | T |
| 0.87592086713200 | 0.49786968000300 | 0.06445006049790 | T | T | T |
| 0.38015136008700 | 0.16932481638600 | 0.19566245778200 | T | T | T |
| 0.37485588238200 | 0.83180522778800 | 0.19600411874500 | T | T | T |
| 0.37517512517600 | 0.49093130599900 | 0.19761941677500 | T | T | T |
| 0.87530634062500 | 0.16475312296100 | 0.19637939535400 | T | T | T |
| 0.87491333810800 | 0.83172995939900 | 0.19644694572600 | T | T | T |
| 0.87593662883300 | 0.49782347022100 | 0.19645090636500 | T | T | T |
| 0.00030913983246 | 0.02368121376740 | 0.01583126627350 | T | T | T |
| 0.99933198012700 | 0.68896662160200 | 0.01567859088210 | T | T | T |
| 0.00168629727284 | 0.35524009521000 | 0.01580070001200 | T | T | T |
| 0.49970200731200 | 0.02533818583510 | 0.01547750009790 | T | T | T |
| 0.49576347978300 | 0.67471341059300 | 0.01384577177960 | T | T | T |
| 0.48889768372700 | 0.31013209435700 | 0.98139253829700 | T | T | T |
| 0.25089177739000 | 0.02443336970830 | 0.01593779544060 | T | T | T |
| 0.24441603677600 | 0.68532335256600 | 0.01620864451760 | T | T | T |
| 0.24954060886400 | 0.36094545697000 | 0.01368892828760 | T | T | T |
| 0.74911186619900 | 0.02453338382250 | 0.01587376719560 | T | T | T |
| 0.75240927655400 | 0.68750886568900 | 0.01655149541700 | T | T | T |
| 0.75958184578200 | 0.35332949980200 | 0.01724295223300 | T | T | T |
| 0.12746744184000 | 0.16608250835200 | 0.06429785112700 | T | T | T |
| 0.12486750192600 | 0.83124235167100 | 0.06436200053080 | T | T | T |

|                  |                  |                  |   |   |   |
|------------------|------------------|------------------|---|---|---|
| 0.12510059752400 | 0.49788096997300 | 0.06441743295740 | T | T | T |
| 0.61869963059700 | 0.16755931220300 | 0.06486020989120 | T | T | T |
| 0.62430407207400 | 0.83271941595200 | 0.06451956097700 | T | T | T |
| 0.62544994851700 | 0.49709793365700 | 0.06576684945060 | T | T | T |
| 0.00000000000000 | 0.00000000000000 | 0.13043999673400 | F | F | F |
| 0.00000000000000 | 0.66667002414000 | 0.13043999673400 | F | F | F |
| 0.00000000000000 | 0.33333000540000 | 0.13043999673400 | F | F | F |
| 0.50000000002500 | 0.00000000000000 | 0.13043999673400 | F | F | F |
| 0.50000000002500 | 0.66667002414000 | 0.13043999673400 | F | F | F |
| 0.50000000002500 | 0.33333000540000 | 0.13043999673400 | F | F | F |
| 0.24999999998000 | 0.00000000000000 | 0.13043999673400 | F | F | F |
| 0.24999999998000 | 0.66667002414000 | 0.13043999673400 | F | F | F |
| 0.24999999998000 | 0.33333000540000 | 0.13043999673400 | F | F | F |
| 0.75000000026600 | 0.00000000000000 | 0.13043999673400 | F | F | F |
| 0.75000000026600 | 0.66667002414000 | 0.13043999673400 | F | F | F |
| 0.75000000026600 | 0.33333000540000 | 0.13043999673400 | F | F | F |
| 0.12751025589200 | 0.16607254959400 | 0.19661230856600 | T | T | T |
| 0.12486378165700 | 0.83119665255000 | 0.19656680069800 | T | T | T |
| 0.12514620261700 | 0.49785203761200 | 0.19648610299300 | T | T | T |
| 0.61876871647000 | 0.16761683945400 | 0.19598356010900 | T | T | T |
| 0.62433245649000 | 0.83247680056300 | 0.19648067966700 | T | T | T |
| 0.62549362884900 | 0.49703105432600 | 0.19510866598200 | T | T | T |
| 0.00033482960718 | 0.02368019426970 | 0.24498938098700 | T | T | T |
| 0.99938576813900 | 0.68893969095400 | 0.24515548355300 | T | T | T |
| 0.00182940083904 | 0.35527870623200 | 0.24503626683500 | T | T | T |
| 0.49973006322400 | 0.02533324501910 | 0.24529445887100 | T | T | T |
| 0.49583182156400 | 0.67467069670700 | 0.24707287368000 | T | T | T |
| 0.48896579052500 | 0.31006443929200 | 0.27945315106500 | T | T | T |
| 0.25094589816400 | 0.02445069348160 | 0.24484999166800 | T | T | T |
| 0.24447085781600 | 0.68533235286300 | 0.24460765722700 | T | T | T |

|                  |                  |                  |   |   |   |
|------------------|------------------|------------------|---|---|---|
| 0.24961152742600 | 0.36097048156700 | 0.24715553747500 | T | T | T |
| 0.74915062289500 | 0.02454392656290 | 0.24489654618200 | T | T | T |
| 0.75245836695500 | 0.68732104745400 | 0.24441444782200 | T | T | T |
| 0.75967845458200 | 0.35333168105100 | 0.24375868270000 | T | T | T |
| 0.37501899960400 | 0.09473458019810 | 0.99599438013100 | T | T | T |
| 0.37292728419400 | 0.75278613584400 | 0.99844325285800 | T | T | T |
| 0.37566262653300 | 0.42486816653100 | 0.99500164926100 | T | T | T |
| 0.87501848796200 | 0.09279929856870 | 0.99576651431100 | T | T | T |
| 0.87430433542400 | 0.75913570132900 | 0.99534090807100 | T | T | T |
| 0.87804456174900 | 0.42633617164700 | 0.99519955078300 | T | T | T |
| 0.37500000000400 | 0.08332999798400 | 0.13043999673400 | F | F | F |
| 0.37500000000400 | 0.74999999984900 | 0.13043999673400 | F | F | F |
| 0.37500000000400 | 0.41666999457100 | 0.13043999673400 | F | F | F |
| 0.87500000009500 | 0.08332999798400 | 0.13043999673400 | F | F | F |
| 0.87500000009500 | 0.74999999984900 | 0.13043999673400 | F | F | F |
| 0.87500000009500 | 0.41666999457100 | 0.13043999673400 | F | F | F |
| 0.37506909884400 | 0.09471499966090 | 0.26479407908600 | T | T | T |
| 0.37295852712600 | 0.75277194796500 | 0.26240170114500 | T | T | T |
| 0.37578733010800 | 0.42481463451300 | 0.26582363868200 | T | T | T |
| 0.87503888461100 | 0.09275949903540 | 0.26507776671900 | T | T | T |
| 0.87435758392000 | 0.75902158412000 | 0.26555952746500 | T | T | T |
| 0.87820390488700 | 0.42632306480000 | 0.26571614402700 | T | T | T |
| 0.12516521933900 | 0.09289437685900 | 0.99572653776600 | T | T | T |
| 0.12348576771600 | 0.75901260804500 | 0.99519183320600 | T | T | T |
| 0.12258396058300 | 0.42782252354400 | 0.99509978145900 | T | T | T |
| 0.62496854052600 | 0.09403344236390 | 0.99562334772800 | T | T | T |
| 0.62199278372000 | 0.75136260380500 | 0.99731369639200 | T | T | T |
| 0.62446472157300 | 0.40904418632400 | 0.00323734700732 | T | T | T |
| 0.00053610476063 | 0.24811708146100 | 0.06659049848970 | T | T | T |
| 0.99995629966800 | 0.91524015993600 | 0.06620274433160 | T | T | T |

|                  |                  |                  |   |   |   |
|------------------|------------------|------------------|---|---|---|
| 0.00001189890228 | 0.58207718386300 | 0.06656501819760 | T | T | T |
| 0.50060547596000 | 0.25687611756100 | 0.06321304631190 | T | T | T |
| 0.49955506426700 | 0.91552319352700 | 0.06570617926790 | T | T | T |
| 0.49901104224100 | 0.57742743029900 | 0.06857184706540 | T | T | T |
| 0.25146120821600 | 0.25133383804200 | 0.06528521080540 | T | T | T |
| 0.24984595007100 | 0.91506425009200 | 0.06608204579690 | T | T | T |
| 0.25107800565900 | 0.58019909171700 | 0.06713372380710 | T | T | T |
| 0.74978982627700 | 0.24679389505400 | 0.06723914778270 | T | T | T |
| 0.74989797460600 | 0.91504379853500 | 0.06590129382280 | T | T | T |
| 0.75020006155600 | 0.58099630300900 | 0.06685210032340 | T | T | T |
| 0.12500000002200 | 0.08332999798400 | 0.13043999673400 | F | F | F |
| 0.12500000002200 | 0.74999999984900 | 0.13043999673400 | F | F | F |
| 0.12500000002200 | 0.41666999457100 | 0.13043999673400 | F | F | F |
| 0.62499999998400 | 0.08332999798400 | 0.13043999673400 | F | F | F |
| 0.62499999998400 | 0.74999999984900 | 0.13043999673400 | F | F | F |
| 0.62499999998400 | 0.41666999457100 | 0.13043999673400 | F | F | F |
| 0.00058499474226 | 0.24814147878400 | 0.19426904217400 | T | T | T |
| 0.99995480869000 | 0.91519274438200 | 0.19467509971400 | T | T | T |
| 0.00004396833107 | 0.58203800980300 | 0.19429107009700 | T | T | T |
| 0.50066502986000 | 0.25690332304300 | 0.19765324369500 | T | T | T |
| 0.49961394798300 | 0.91541919654000 | 0.19516623335000 | T | T | T |
| 0.49908448523200 | 0.57746527081500 | 0.19229457430600 | T | T | T |
| 0.25148141716000 | 0.25135399961500 | 0.19559704245300 | T | T | T |
| 0.24984223506700 | 0.91502039447300 | 0.19477393992000 | T | T | T |
| 0.25109415317200 | 0.58017756640700 | 0.19370936456500 | T | T | T |
| 0.74982358252300 | 0.24688453367200 | 0.19367251466200 | T | T | T |
| 0.74988749229300 | 0.91494740700200 | 0.19496803856300 | T | T | T |
| 0.75023319827800 | 0.58096315095100 | 0.19400714296700 | T | T | T |
| 0.12521314100900 | 0.09282448703650 | 0.26514010829900 | T | T | T |
| 0.12353309890700 | 0.75891596978300 | 0.26571277596100 | T | T | T |

|                  |                  |                  |   |   |   |
|------------------|------------------|------------------|---|---|---|
| 0.12269962465600 | 0.42782343206300 | 0.26582022838200 | T | T | T |
| 0.62499550259300 | 0.09397702508350 | 0.26517963984500 | T | T | T |
| 0.62209902986400 | 0.75119247837300 | 0.26375689455400 | T | T | T |
| 0.62454135097800 | 0.40906396970000 | 0.25770176991600 | T | T | T |
| 0.57323666762000 | 0.67707821964100 | 0.37487070655900 | T | T | T |
| 0.65316558860500 | 0.46649323735700 | 0.29016231334700 | T | T | T |
| 0.67310702098900 | 0.71462912153500 | 0.33510387830300 | T | T | T |
| 0.49220099398300 | 0.74083568928100 | 0.36007715462900 | T | T | T |
| 0.48937596660800 | 0.63624090892700 | 0.35251575008700 | T | T | T |
| 0.53417298851000 | 0.81599350021500 | 0.32168880788600 | T | T | T |
| 0.43426361494800 | 0.80554135653700 | 0.31986907318400 | T | T | T |
| 0.71365107787500 | 0.70722200228000 | 0.38261993529400 | T | T | T |
| 0.43142599713000 | 0.53706964079900 | 0.29832819227700 | T | T | T |
| 0.53098230418200 | 0.54035090432100 | 0.30340151579900 | T | T | T |
| 0.57400790358600 | 0.67692710585700 | 0.88598785530200 | T | T | T |
| 0.65315702127900 | 0.46639861833500 | 0.97078035707400 | T | T | T |
| 0.67332563503700 | 0.71413050331600 | 0.92649486600200 | T | T | T |
| 0.49296575233800 | 0.74095139685700 | 0.90063733501000 | T | T | T |
| 0.48974009084900 | 0.63629756940700 | 0.90792841911700 | T | T | T |
| 0.53464334320700 | 0.81543993269000 | 0.93938904298700 | T | T | T |
| 0.43468322505200 | 0.80506814616800 | 0.94094506473500 | T | T | T |
| 0.71549486055200 | 0.70585711310000 | 0.87939779188200 | T | T | T |
| 0.43130552812000 | 0.53744312446100 | 0.96228339617500 | T | T | T |
| 0.53082604029600 | 0.54048301933700 | 0.95725179004500 | T | T | T |
| 0.67095621651600 | 0.68315626014800 | 0.36304636897100 | T | T | T |
| 0.50727269381200 | 0.67847566881900 | 0.37458467267900 | T | T | T |
| 0.48352724006400 | 0.81216748443700 | 0.34162067162100 | T | T | T |
| 0.48062318518400 | 0.57590611679600 | 0.30600804124400 | T | T | T |
| 0.67174497435800 | 0.68246322342100 | 0.89860047965600 | T | T | T |
| 0.50809528455600 | 0.67856027260200 | 0.88598228526200 | T | T | T |



|                  |                  |                  |   |   |   |
|------------------|------------------|------------------|---|---|---|
| 0.48414041676500 | 0.81188208348800 | 0.91931973751000 | T | T | T |
| 0.48056843593200 | 0.57612306573400 | 0.95458928810800 | T | T | T |

**2) Small supercell 1-H<sup>+</sup><sub>sol</sub> FS**

POSCAR

1

|                   |                   |                   |
|-------------------|-------------------|-------------------|
| 15.60575999998655 | 0.00000000000000  | 0.00000000000000  |
| 0.00000000000000  | 16.55240999999278 | 0.00000000000000  |
| 0.00000000000000  | 0.00000000000000  | 30.38812199999634 |

Ga P H O

60 60 20 8

Direct

|                  |                  |                  |   |   |   |
|------------------|------------------|------------------|---|---|---|
| 0.37495778504600 | 0.16425962788400 | 0.06415870259020 | T | T | T |
| 0.37493371192800 | 0.83025040120900 | 0.06439732694410 | T | T | T |
| 0.37607276530100 | 0.49869627798900 | 0.06483236708940 | T | T | T |
| 0.87513432630900 | 0.16431295619900 | 0.06423218610880 | T | T | T |
| 0.87479194440100 | 0.83097232800800 | 0.06427578361190 | T | T | T |
| 0.87496861913800 | 0.49745725394600 | 0.06417857358870 | T | T | T |
| 0.37495446287900 | 0.16424687455800 | 0.19677050646300 | T | T | T |
| 0.37493882176000 | 0.83021721154000 | 0.19652011960900 | T | T | T |
| 0.37607808446600 | 0.49871969741900 | 0.19601627603600 | T | T | T |
| 0.87514030016700 | 0.16429098587600 | 0.19669669061700 | T | T | T |
| 0.87479574485100 | 0.83096917315400 | 0.19662986337900 | T | T | T |
| 0.87496357559900 | 0.49745860173600 | 0.19674228489200 | T | T | T |
| 0.00004963120351 | 0.02197760576390 | 0.01569674628360 | T | T | T |
| 0.99974668907500 | 0.68890888174800 | 0.01569294578160 | T | T | T |
| 0.00010750954290 | 0.35535527323900 | 0.01561330425500 | T | T | T |
| 0.49986154035700 | 0.02195223497180 | 0.01578196585200 | T | T | T |
| 0.49859858780900 | 0.67439012963600 | 0.00753992219645 | T | T | T |
| 0.50097709089400 | 0.35514742445500 | 0.01568714516310 | T | T | T |

|                  |                  |                  |   |   |   |
|------------------|------------------|------------------|---|---|---|
| 0.24989636552200 | 0.02161514853930 | 0.01580799830200 | T | T | T |
| 0.24846019674400 | 0.68912956256800 | 0.01530674044940 | T | T | T |
| 0.24996713699700 | 0.35593696786100 | 0.01535132161870 | T | T | T |
| 0.75009345105000 | 0.02204811159020 | 0.01586577919860 | T | T | T |
| 0.75054867962100 | 0.68704560264200 | 0.01541668105430 | T | T | T |
| 0.75025101135200 | 0.35497907481000 | 0.01574764844320 | T | T | T |
| 0.12513575416000 | 0.16441880904600 | 0.06415104919270 | T | T | T |
| 0.12500745815900 | 0.83110312657400 | 0.06433191098550 | T | T | T |
| 0.12519543373300 | 0.49795470646800 | 0.06426854247810 | T | T | T |
| 0.62504556106400 | 0.16434934417400 | 0.06422251185640 | T | T | T |
| 0.62476816592700 | 0.83060652601500 | 0.06415312206390 | T | T | T |
| 0.62378256490700 | 0.49762043482200 | 0.06424759856550 | T | T | T |
| 0.00000000000000 | 0.00000000000000 | 0.13043999673400 | F | F | F |
| 0.00000000000000 | 0.66667002414000 | 0.13043999673400 | F | F | F |
| 0.00000000000000 | 0.33333000540000 | 0.13043999673400 | F | F | F |
| 0.50000000002500 | 0.00000000000000 | 0.13043999673400 | F | F | F |
| 0.50000000002500 | 0.66667002414000 | 0.13043999673400 | F | F | F |
| 0.50000000002500 | 0.33333000540000 | 0.13043999673400 | F | F | F |
| 0.24999999998000 | 0.00000000000000 | 0.13043999673400 | F | F | F |
| 0.24999999998000 | 0.66667002414000 | 0.13043999673400 | F | F | F |
| 0.24999999998000 | 0.33333000540000 | 0.13043999673400 | F | F | F |
| 0.75000000026600 | 0.00000000000000 | 0.13043999673400 | F | F | F |
| 0.75000000026600 | 0.66667002414000 | 0.13043999673400 | F | F | F |
| 0.75000000026600 | 0.33333000540000 | 0.13043999673400 | F | F | F |
| 0.12514318623900 | 0.16440193766700 | 0.19678312579000 | T | T | T |
| 0.12501992125300 | 0.83107094609700 | 0.19658711868500 | T | T | T |
| 0.12520505178300 | 0.49792051063500 | 0.19665322160200 | T | T | T |
| 0.62504812296400 | 0.16433007843800 | 0.19670254739700 | T | T | T |
| 0.62476933708000 | 0.83058013239500 | 0.19678250156800 | T | T | T |
| 0.62379802675100 | 0.49761802026000 | 0.19666410111300 | T | T | T |

|                  |                  |                  |   |   |   |
|------------------|------------------|------------------|---|---|---|
| 0.00005466116703 | 0.02193837607730 | 0.24512258225700 | T | T | T |
| 0.99975302288900 | 0.68890801329100 | 0.24512139275100 | T | T | T |
| 0.00011471227492 | 0.35534098679000 | 0.24520764832000 | T | T | T |
| 0.49986186618300 | 0.02193448233160 | 0.24503595595900 | T | T | T |
| 0.49867368935000 | 0.67438052808100 | 0.25326729361000 | T | T | T |
| 0.50099300431700 | 0.35513926688700 | 0.24511430850800 | T | T | T |
| 0.24989976534000 | 0.02157812255790 | 0.24500876083900 | T | T | T |
| 0.24844855359800 | 0.68907468797000 | 0.24556114148800 | T | T | T |
| 0.24998266611200 | 0.35593591406100 | 0.24550010172200 | T | T | T |
| 0.75009939467300 | 0.02201661572480 | 0.24494742423200 | T | T | T |
| 0.75056773773400 | 0.68709882857500 | 0.24541708015100 | T | T | T |
| 0.75026410319300 | 0.35497137839500 | 0.24506430521000 | T | T | T |
| 0.37484240002800 | 0.09167492920020 | 0.99567523438300 | T | T | T |
| 0.37459800764000 | 0.75678527113700 | 0.99727817314400 | T | T | T |
| 0.37599941175400 | 0.42572354064100 | 0.99607995570600 | T | T | T |
| 0.87504003028600 | 0.09180946830390 | 0.99563095655900 | T | T | T |
| 0.87461695851700 | 0.75831974603000 | 0.99565045871700 | T | T | T |
| 0.87510874258100 | 0.42502848677100 | 0.99561604814900 | T | T | T |
| 0.37500000000400 | 0.08332999798400 | 0.13043999673400 | F | F | F |
| 0.37500000000400 | 0.74999999984900 | 0.13043999673400 | F | F | F |
| 0.37500000000400 | 0.41666999457100 | 0.13043999673400 | F | F | F |
| 0.87500000009500 | 0.08332999798400 | 0.13043999673400 | F | F | F |
| 0.87500000009500 | 0.74999999984900 | 0.13043999673400 | F | F | F |
| 0.87500000009500 | 0.41666999457100 | 0.13043999673400 | F | F | F |
| 0.37484109984500 | 0.09160378291740 | 0.26521625153100 | T | T | T |
| 0.37461254129200 | 0.75667175895200 | 0.26361536395300 | T | T | T |
| 0.37604091923400 | 0.42572410904700 | 0.26475436749800 | T | T | T |
| 0.87504452174600 | 0.09172568851610 | 0.26525985608000 | T | T | T |
| 0.87464727461500 | 0.75831097178900 | 0.26522507660400 | T | T | T |
| 0.87511826192400 | 0.42497561496300 | 0.26526794570900 | T | T | T |

|                  |                  |                  |   |   |   |
|------------------|------------------|------------------|---|---|---|
| 0.12506653210800 | 0.09176160473410 | 0.99563332631200 | T | T | T |
| 0.12399551403000 | 0.75919274934500 | 0.99549729682700 | T | T | T |
| 0.12497821577900 | 0.42562502789300 | 0.99553573298100 | T | T | T |
| 0.62498662203600 | 0.09167556965370 | 0.99566776612700 | T | T | T |
| 0.62405951626000 | 0.75548503506500 | 0.99691692821300 | T | T | T |
| 0.62566493007500 | 0.42473776920600 | 0.99561861894800 | T | T | T |
| 0.00014053226063 | 0.24806564581800 | 0.06645750569760 | T | T | T |
| 0.99989275048500 | 0.91462977543600 | 0.06651347703740 | T | T | T |
| 0.99988135911000 | 0.58141788615100 | 0.06645204183260 | T | T | T |
| 0.49990975981800 | 0.24792716615200 | 0.06652042227070 | T | T | T |
| 0.49983065903000 | 0.91432440174700 | 0.06644650132190 | T | T | T |
| 0.50016596150300 | 0.58227367494100 | 0.06696087493470 | T | T | T |
| 0.25023292234200 | 0.24845926925300 | 0.06630656499780 | T | T | T |
| 0.25013449466000 | 0.91453477086400 | 0.06666195822810 | T | T | T |
| 0.25002633276000 | 0.58168122269200 | 0.06633754531580 | T | T | T |
| 0.75019713944800 | 0.24778001023000 | 0.06656496310370 | T | T | T |
| 0.74977085310700 | 0.91450517825400 | 0.06651013371110 | T | T | T |
| 0.74970853253000 | 0.58073093306500 | 0.06663732344630 | T | T | T |
| 0.1250000002200  | 0.08332999798400 | 0.13043999673400 | F | F | F |
| 0.1250000002200  | 0.7499999984900  | 0.13043999673400 | F | F | F |
| 0.1250000002200  | 0.41666999457100 | 0.13043999673400 | F | F | F |
| 0.6249999998400  | 0.08332999798400 | 0.13043999673400 | F | F | F |
| 0.6249999998400  | 0.7499999984900  | 0.13043999673400 | F | F | F |
| 0.6249999998400  | 0.41666999457100 | 0.13043999673400 | F | F | F |
| 0.00014608676956 | 0.24802640663500 | 0.19441566195600 | T | T | T |
| 0.99990598418700 | 0.91458766171200 | 0.19434762469300 | T | T | T |
| 0.99989442981100 | 0.58138180964000 | 0.19442022387000 | T | T | T |
| 0.49991372992200 | 0.24788314301400 | 0.19434949497300 | T | T | T |
| 0.49983006833900 | 0.91428623815600 | 0.19442842989400 | T | T | T |
| 0.50018735706900 | 0.58225508621800 | 0.19387449711600 | T | T | T |

|                  |                  |                  |   |   |   |
|------------------|------------------|------------------|---|---|---|
| 0.25023598712300 | 0.24843990428400 | 0.19458221982000 | T | T | T |
| 0.25014557145500 | 0.91448575550200 | 0.19420045503600 | T | T | T |
| 0.25002401738200 | 0.58166201290700 | 0.19453781045800 | T | T | T |
| 0.75020051111900 | 0.24773908430500 | 0.19429776909500 | T | T | T |
| 0.74976512837000 | 0.91446605654800 | 0.19435136944700 | T | T | T |
| 0.74970491381700 | 0.58073654511400 | 0.19423977064500 | T | T | T |
| 0.12507080097700 | 0.09167343659990 | 0.26526201738300 | T | T | T |
| 0.12399915772800 | 0.75913916288500 | 0.26540598680000 | T | T | T |
| 0.12497723658100 | 0.42557285460800 | 0.26536599586600 | T | T | T |
| 0.62499456473700 | 0.09160515402040 | 0.26521932705100 | T | T | T |
| 0.62409615983200 | 0.75548182373500 | 0.26401684570500 | T | T | T |
| 0.62567106796700 | 0.42468963974700 | 0.26525896549400 | T | T | T |
| 0.58351043168200 | 0.67818029493800 | 0.37943691204700 | T | T | T |
| 0.63746109170200 | 0.48985541555600 | 0.37035843234900 | T | T | T |
| 0.68446542056700 | 0.73684385260200 | 0.33935152729500 | T | T | T |
| 0.50063335791800 | 0.72903596929000 | 0.37037946574300 | T | T | T |
| 0.50604980645400 | 0.62984438633100 | 0.33862471383900 | T | T | T |
| 0.53447804092600 | 0.82607524941000 | 0.32753672804500 | T | T | T |
| 0.43611923559900 | 0.81678972515900 | 0.32770964851100 | T | T | T |
| 0.72508129668900 | 0.74224177104100 | 0.38630176906500 | T | T | T |
| 0.45662932404600 | 0.55760067868100 | 0.30619022635800 | T | T | T |
| 0.63394006031600 | 0.49630364837200 | 0.39490921786400 | T | T | T |
| 0.58371646329700 | 0.67776940988800 | 0.88138285722300 | T | T | T |
| 0.63749299476700 | 0.48951450059200 | 0.89058624879700 | T | T | T |
| 0.68418399295600 | 0.73619685898000 | 0.92201006962100 | T | T | T |
| 0.50089323921200 | 0.72884162246100 | 0.89021629739500 | T | T | T |
| 0.50592173946300 | 0.62983101409200 | 0.92208631840800 | T | T | T |
| 0.53481479281600 | 0.82589859508400 | 0.93317481928700 | T | T | T |
| 0.43643547731400 | 0.81675916033100 | 0.93302329544500 | T | T | T |
| 0.72697111682000 | 0.74014622541500 | 0.87550402279400 | T | T | T |

|                  |                  |                  |   |   |   |
|------------------|------------------|------------------|---|---|---|
| 0.45626885069700 | 0.55780219198700 | 0.95455280139600 | T | T | T |
| 0.63336339830700 | 0.49539656849000 | 0.86601600488700 | T | T | T |
| 0.69000994381700 | 0.70756198051500 | 0.36753194048900 | T | T | T |
| 0.52003792711000 | 0.67215123071400 | 0.37668497536800 | T | T | T |
| 0.48548694627200 | 0.82379478577200 | 0.34794983392700 | T | T | T |
| 0.49964343289800 | 0.60097783034100 | 0.30609871895800 | T | T | T |
| 0.69016658134400 | 0.70652071492500 | 0.89396633806300 | T | T | T |
| 0.52020934182400 | 0.67191704166500 | 0.88394689859400 | T | T | T |
| 0.48580260120900 | 0.82359935063500 | 0.91276665085500 | T | T | T |
| 0.49934595283100 | 0.60112122287900 | 0.95462571835300 | T | T | T |

### 3) Small supercell 2-H<sup>+</sup><sub>sol</sub> IS

POSCAR

1

|                    |                    |                    |
|--------------------|--------------------|--------------------|
| 15.60575999998655  | 0.0000000000000000 | 0.0000000000000000 |
| 0.0000000000000000 | 16.55240999999278  | 0.0000000000000000 |
| 0.0000000000000000 | 0.0000000000000000 | 30.38812199999634  |

Ga P H O

60 60 38 16

Direct

|                  |                  |                  |   |   |   |
|------------------|------------------|------------------|---|---|---|
| 0.38019415156700 | 0.16928729468800 | 0.06491920659850 | T | T | T |
| 0.37515468243300 | 0.83156531196200 | 0.06497044744530 | T | T | T |
| 0.37561187217100 | 0.49051979099200 | 0.06307923604890 | T | T | T |
| 0.87482612108100 | 0.16381145591300 | 0.06415112771990 | T | T | T |
| 0.87520291919700 | 0.83083518913800 | 0.06444029541390 | T | T | T |
| 0.87527012739400 | 0.49660113215400 | 0.06499022135990 | T | T | T |
| 0.38018217893500 | 0.16927054053100 | 0.19593140830500 | T | T | T |
| 0.37516044865000 | 0.83158282721900 | 0.19589203488800 | T | T | T |
| 0.37560037992100 | 0.49051006431300 | 0.19775735790700 | T | T | T |
| 0.87482928058600 | 0.16375789653100 | 0.19680371394800 | T | T | T |

|                  |                  |                  |   |   |   |
|------------------|------------------|------------------|---|---|---|
| 0.87519553983200 | 0.83085650479600 | 0.19645427217600 | T | T | T |
| 0.87527478811800 | 0.49652244045600 | 0.19587567680400 | T | T | T |
| 0.00026125786055 | 0.02585388422710 | 0.01716655927310 | T | T | T |
| 0.99904509435500 | 0.67710385162300 | 0.01358711088320 | T | T | T |
| 0.00028639315922 | 0.35483522548800 | 0.01737620325230 | T | T | T |
| 0.49983605346100 | 0.02623519260420 | 0.01655480966800 | T | T | T |
| 0.49656806155100 | 0.67581955069600 | 0.01420436496040 | T | T | T |
| 0.48669433205700 | 0.30675146080600 | 0.97966186328500 | T | T | T |
| 0.25118366063300 | 0.02576514089860 | 0.01662458527870 | T | T | T |
| 0.24841829978900 | 0.68502787082500 | 0.01815213629340 | T | T | T |
| 0.25098076173700 | 0.36320192844900 | 0.01380371822970 | T | T | T |
| 0.74906159840400 | 0.02527684825350 | 0.01678901698430 | T | T | T |
| 0.74904356271800 | 0.68772819505400 | 0.01762453251020 | T | T | T |
| 0.75582522403600 | 0.35493574071700 | 0.01742810531570 | T | T | T |
| 0.12798618202400 | 0.16531476141600 | 0.06397217716580 | T | T | T |
| 0.12508227794000 | 0.83224685112400 | 0.06480046237020 | T | T | T |
| 0.12504090766700 | 0.49700216397900 | 0.06524033891900 | T | T | T |
| 0.61831764047200 | 0.16696923441900 | 0.06458910321750 | T | T | T |
| 0.62457661935600 | 0.83191329251300 | 0.06454866030670 | T | T | T |
| 0.62517008415600 | 0.49659697366200 | 0.06566815140600 | T | T | T |
| 0.00000000000000 | 0.00000000000000 | 0.13043999673400 | F | F | F |
| 0.00000000000000 | 0.66667002414000 | 0.13043999673400 | F | F | F |
| 0.00000000000000 | 0.33333000540000 | 0.13043999673400 | F | F | F |
| 0.50000000002500 | 0.00000000000000 | 0.13043999673400 | F | F | F |
| 0.50000000002500 | 0.66667002414000 | 0.13043999673400 | F | F | F |
| 0.50000000002500 | 0.33333000540000 | 0.13043999673400 | F | F | F |
| 0.24999999998000 | 0.00000000000000 | 0.13043999673400 | F | F | F |
| 0.24999999998000 | 0.66667002414000 | 0.13043999673400 | F | F | F |
| 0.24999999998000 | 0.33333000540000 | 0.13043999673400 | F | F | F |
| 0.75000000026600 | 0.00000000000000 | 0.13043999673400 | F | F | F |

|                  |                  |                  |   |   |   |
|------------------|------------------|------------------|---|---|---|
| 0.75000000026600 | 0.66667002414000 | 0.13043999673400 | F | F | F |
| 0.75000000026600 | 0.33333000540000 | 0.13043999673400 | F | F | F |
| 0.12791170684900 | 0.16526406620100 | 0.19697889649100 | T | T | T |
| 0.12505910130700 | 0.83231252047500 | 0.19607262358800 | T | T | T |
| 0.12504553706100 | 0.49699531823300 | 0.19558297682400 | T | T | T |
| 0.61836084021800 | 0.16693779564000 | 0.19631348474400 | T | T | T |
| 0.62458739630300 | 0.83186868613600 | 0.19636221527200 | T | T | T |
| 0.62513289591600 | 0.49656668897600 | 0.19517283337200 | T | T | T |
| 0.00024778944507 | 0.02582414316730 | 0.24390818338300 | T | T | T |
| 0.99913515389500 | 0.67701528259600 | 0.24722475266600 | T | T | T |
| 0.00024696425076 | 0.35480037800200 | 0.24361270049100 | T | T | T |
| 0.49983728389100 | 0.02622277322830 | 0.24436950409000 | T | T | T |
| 0.49647313886900 | 0.67574867047400 | 0.24666428545800 | T | T | T |
| 0.48675740497800 | 0.30663503247900 | 0.28113141247600 | T | T | T |
| 0.25119369718400 | 0.02576862011040 | 0.24430530670200 | T | T | T |
| 0.24843043157600 | 0.68504253706300 | 0.24271198879800 | T | T | T |
| 0.25095479112800 | 0.36315741565900 | 0.24703864632900 | T | T | T |
| 0.74905948185000 | 0.02524902828650 | 0.24421212166600 | T | T | T |
| 0.74898573228900 | 0.68743364197500 | 0.24327593009000 | T | T | T |
| 0.75582411046800 | 0.35490077082400 | 0.24354069621900 | T | T | T |
| 0.37536303351500 | 0.09451691420050 | 0.99579202449700 | T | T | T |
| 0.37365173137100 | 0.75297749760000 | 0.99808579878100 | T | T | T |
| 0.37626614617200 | 0.42613684114900 | 0.99428729842500 | T | T | T |
| 0.87474509282800 | 0.09237398037620 | 0.99543547973300 | T | T | T |
| 0.87509997820300 | 0.75303730837300 | 0.99665859521800 | T | T | T |
| 0.87752770348300 | 0.42545290667800 | 0.99557469614000 | T | T | T |
| 0.37500000000400 | 0.08332999798400 | 0.13043999673400 | F | F | F |
| 0.37500000000400 | 0.74999999984900 | 0.13043999673400 | F | F | F |
| 0.37500000000400 | 0.41666999457100 | 0.13043999673400 | F | F | F |
| 0.87500000009500 | 0.08332999798400 | 0.13043999673400 | F | F | F |



|                  |                  |                  |   |   |   |
|------------------|------------------|------------------|---|---|---|
| 0.87500000009500 | 0.74999999984900 | 0.13043999673400 | F | F | F |
| 0.87500000009500 | 0.41666999457100 | 0.13043999673400 | F | F | F |
| 0.37537475428600 | 0.09456263668730 | 0.26508579744800 | T | T | T |
| 0.37363508440000 | 0.75300179209600 | 0.26279651948800 | T | T | T |
| 0.37630073559700 | 0.42599131713400 | 0.26651628378200 | T | T | T |
| 0.87471861357400 | 0.09241339311700 | 0.26556701839100 | T | T | T |
| 0.87505592601200 | 0.75281900561500 | 0.26413776112900 | T | T | T |
| 0.87749821475200 | 0.42551267731100 | 0.26535999753200 | T | T | T |
| 0.12543835617900 | 0.09260951883090 | 0.99536798868600 | T | T | T |
| 0.12316410269700 | 0.75353366589400 | 0.99691592327400 | T | T | T |
| 0.12071691685100 | 0.42733459242300 | 0.99579456905100 | T | T | T |
| 0.62491572724300 | 0.09335784050300 | 0.99542609115900 | T | T | T |
| 0.62137466969400 | 0.75216183654900 | 0.99661946477700 | T | T | T |
| 0.62203161945000 | 0.41114348197900 | 0.00197245554105 | T | T | T |
| 0.00043476404300 | 0.24723066456000 | 0.06705282267250 | T | T | T |
| 0.99977768810300 | 0.91502495004700 | 0.06611359224400 | T | T | T |
| 0.99991656190300 | 0.57988384265200 | 0.06854368717060 | T | T | T |
| 0.50065800682400 | 0.25723459048900 | 0.06303094236460 | T | T | T |
| 0.49983681544200 | 0.91527343014900 | 0.06592741181910 | T | T | T |
| 0.49905674435400 | 0.57789752566500 | 0.06852329172930 | T | T | T |
| 0.25100280893200 | 0.25254378236100 | 0.06497885563310 | T | T | T |
| 0.25019199280700 | 0.91502340399800 | 0.06597423435060 | T | T | T |
| 0.25085458997400 | 0.57902699214500 | 0.06793972220390 | T | T | T |
| 0.74968904991000 | 0.24746364124800 | 0.06706511971510 | T | T | T |
| 0.75025685849500 | 0.91430267669500 | 0.06587870829760 | T | T | T |
| 0.75025256888800 | 0.58033555769400 | 0.06724962280120 | T | T | T |
| 0.12500000002200 | 0.08332999798400 | 0.13043999673400 | F | F | F |
| 0.12500000002200 | 0.74999999984900 | 0.13043999673400 | F | F | F |
| 0.12500000002200 | 0.41666999457100 | 0.13043999673400 | F | F | F |
| 0.62499999998400 | 0.08332999798400 | 0.13043999673400 | F | F | F |

|                  |                  |                  |   |   |   |
|------------------|------------------|------------------|---|---|---|
| 0.6249999998400  | 0.74999999984900 | 0.13043999673400 | F | F | F |
| 0.6249999998400  | 0.41666999457100 | 0.13043999673400 | F | F | F |
| 0.00039913078358 | 0.24725161221500 | 0.19386681339800 | T | T | T |
| 0.99974413346100 | 0.91510984638300 | 0.19484011802000 | T | T | T |
| 0.99990894692800 | 0.57981115502700 | 0.19228230125000 | T | T | T |
| 0.50067509384900 | 0.25717888883500 | 0.19782585172400 | T | T | T |
| 0.49986941874100 | 0.91527124382500 | 0.19498299087900 | T | T | T |
| 0.49903410887600 | 0.57786902854500 | 0.19232864168900 | T | T | T |
| 0.25095580160900 | 0.25248668253500 | 0.19589361582400 | T | T | T |
| 0.25019313313500 | 0.91505541165700 | 0.19492191190500 | T | T | T |
| 0.25085113145000 | 0.57902219882900 | 0.19294058490000 | T | T | T |
| 0.74971611945100 | 0.24747185695400 | 0.19384456199600 | T | T | T |
| 0.75024926406500 | 0.91433816729300 | 0.19505670149000 | T | T | T |
| 0.75023848061400 | 0.58022401914700 | 0.19358188944600 | T | T | T |
| 0.12546542572500 | 0.09260749892070 | 0.26561424466900 | T | T | T |
| 0.12316731158200 | 0.75353157234800 | 0.26394556755100 | T | T | T |
| 0.12073066158800 | 0.42735356831200 | 0.26505324755100 | T | T | T |
| 0.62489623559400 | 0.09339779821250 | 0.26550618161700 | T | T | T |
| 0.62137470328400 | 0.75198541815100 | 0.26426100039400 | T | T | T |
| 0.62197476686500 | 0.41109770452400 | 0.25886057044400 | T | T | T |
| 0.57566200026100 | 0.67718121751400 | 0.37396587490100 | T | T | T |
| 0.65371436108300 | 0.46933877073000 | 0.29020090154200 | T | T | T |
| 0.67302247028000 | 0.71645834748800 | 0.33415215821600 | T | T | T |
| 0.49292475397500 | 0.73779815656700 | 0.36003312730700 | T | T | T |
| 0.49273912333900 | 0.63376016668600 | 0.35118893593100 | T | T | T |
| 0.53331551351700 | 0.81775909637800 | 0.32325747304000 | T | T | T |
| 0.43425017637300 | 0.80466276267900 | 0.32030342836800 | T | T | T |
| 0.70879105579100 | 0.72199580190600 | 0.38270069422600 | T | T | T |
| 0.43176648983300 | 0.53607899624200 | 0.29926075586700 | T | T | T |
| 0.53154223682100 | 0.53777239888900 | 0.30283489070700 | T | T | T |

|                  |                  |                  |   |   |   |
|------------------|------------------|------------------|---|---|---|
| 0.57592367449300 | 0.67871997800800 | 0.88669456390900 | T | T | T |
| 0.65390697723000 | 0.46938213743200 | 0.97066793336800 | T | T | T |
| 0.67267443740500 | 0.71921443062100 | 0.92652258201200 | T | T | T |
| 0.49266484669800 | 0.73829841754800 | 0.90072721238200 | T | T | T |
| 0.49337547570100 | 0.63428901362100 | 0.90944907189700 | T | T | T |
| 0.53273537991900 | 0.81844753079600 | 0.93749115512600 | T | T | T |
| 0.43379452047700 | 0.80480903409800 | 0.94059527309200 | T | T | T |
| 0.70769317793900 | 0.72663813091600 | 0.87787903096400 | T | T | T |
| 0.43196410611700 | 0.53652109936800 | 0.96138228447700 | T | T | T |
| 0.53171789705300 | 0.53797377981300 | 0.95792982423700 | T | T | T |
| 0.09578242052020 | 0.67623151735800 | 0.37393320053600 | T | T | T |
| 0.18599635481400 | 0.72548996944900 | 0.33377633009400 | T | T | T |
| 0.00631395435884 | 0.72709794851300 | 0.36203334771300 | T | T | T |
| 0.01720531455210 | 0.62603487802000 | 0.35034224050400 | T | T | T |
| 0.03706410613540 | 0.81227279021400 | 0.32483719299800 | T | T | T |
| 0.93854190498900 | 0.79769138317300 | 0.32450122524000 | T | T | T |
| 0.22144340383400 | 0.73646109719800 | 0.38212320914800 | T | T | T |
| 0.95133403563300 | 0.53773135308600 | 0.30176276964100 | T | T | T |
| 0.05122509102030 | 0.53376112756700 | 0.29786229699000 | T | T | T |
| 0.09567414568680 | 0.67544342292700 | 0.88687444357400 | T | T | T |
| 0.18565342132000 | 0.72407913145100 | 0.92752227654200 | T | T | T |
| 0.00644067017148 | 0.72674956172100 | 0.89856148168200 | T | T | T |
| 0.01670769485170 | 0.62569382053000 | 0.91029447794100 | T | T | T |
| 0.03755132109270 | 0.81192173196100 | 0.93582108529000 | T | T | T |
| 0.93899121761200 | 0.79767501880000 | 0.93612302464500 | T | T | T |
| 0.22277018521000 | 0.73398939314500 | 0.87942871257200 | T | T | T |
| 0.95106246762900 | 0.53752446193100 | 0.95906785991600 | T | T | T |
| 0.05096281439390 | 0.53371416205200 | 0.96281022888500 | T | T | T |
| 0.67309099297500 | 0.68874585297500 | 0.36342433341400 | T | T | T |
| 0.50949972182000 | 0.67616443950000 | 0.37375632772700 | T | T | T |

|                  |                  |                  |   |   |   |
|------------------|------------------|------------------|---|---|---|
| 0.48234661926100 | 0.81146969986600 | 0.34272790289900 | T | T | T |
| 0.48197078706500 | 0.57396537442700 | 0.30669524078900 | T | T | T |
| 0.67295597879200 | 0.69226507321900 | 0.89703274636900 | T | T | T |
| 0.50973899621200 | 0.67688095336000 | 0.88692369760900 | T | T | T |
| 0.48173716680400 | 0.81188538382000 | 0.91809355604900 | T | T | T |
| 0.48225622540600 | 0.57427477335500 | 0.95399196086400 | T | T | T |
| 0.18986259105000 | 0.69900703952400 | 0.36324716302100 | T | T | T |
| 0.02995824363760 | 0.66808529675200 | 0.37409060306600 | T | T | T |
| 0.98852372238400 | 0.80309198739400 | 0.34555819002800 | T | T | T |
| 0.00326637748037 | 0.57241339801400 | 0.30597748871600 | T | T | T |
| 0.18976744768800 | 0.69733812275100 | 0.89811796477500 | T | T | T |
| 0.02980437693560 | 0.66765909209900 | 0.88653439160300 | T | T | T |
| 0.98899031611800 | 0.80289444003000 | 0.91508807498100 | T | T | T |
| 0.00292617677186 | 0.57224936789900 | 0.95470149676100 | T | T | T |

#### 4) Small supercell 2-H<sub>sol</sub><sup>+</sup> FS

POSCAR

1

|                   |                   |                   |
|-------------------|-------------------|-------------------|
| 15.60575999998655 | 0.00000000000000  | 0.00000000000000  |
| 0.00000000000000  | 16.55240999999278 | 0.00000000000000  |
| 0.00000000000000  | 0.00000000000000  | 30.38812199999634 |

Ga P H O

60 60 38 16

Direct

|                  |                  |                  |   |   |   |
|------------------|------------------|------------------|---|---|---|
| 0.37481910722700 | 0.16392618896600 | 0.06387117280940 | T | T | T |
| 0.37512163501700 | 0.83046313268800 | 0.06447429564980 | T | T | T |
| 0.37700262583000 | 0.49742069975700 | 0.06476039838520 | T | T | T |
| 0.87484886873200 | 0.16336032983200 | 0.06390133655310 | T | T | T |
| 0.87512398453600 | 0.83042860764300 | 0.06427010081630 | T | T | T |
| 0.87463810237800 | 0.49642738654900 | 0.06482288087730 | T | T | T |

|                  |                  |                  |   |   |   |
|------------------|------------------|------------------|---|---|---|
| 0.37481950846900 | 0.16385481870700 | 0.19707961684100 | T | T | T |
| 0.37512514430500 | 0.83048651142400 | 0.19641026235700 | T | T | T |
| 0.37696408391100 | 0.49741205510300 | 0.19605910957400 | T | T | T |
| 0.87487258672300 | 0.16327455138200 | 0.19704913658400 | T | T | T |
| 0.87514858973100 | 0.83044480012600 | 0.19665222066600 | T | T | T |
| 0.87466448293200 | 0.49639438865200 | 0.19602189850900 | T | T | T |
| 0.00002405123522 | 0.02473028146140 | 0.01673009510040 | T | T | T |
| 0.99909983654600 | 0.67653499829000 | 0.01368793691720 | T | T | T |
| 0.00004342048608 | 0.35498996065400 | 0.01704587553050 | T | T | T |
| 0.49995486638000 | 0.02424320002550 | 0.01677754965020 | T | T | T |
| 0.49854478710600 | 0.67427294768500 | 0.00782605903630 | T | T | T |
| 0.50144670273000 | 0.35541356212600 | 0.01634383912180 | T | T | T |
| 0.25017426652700 | 0.02406450075280 | 0.01662776156170 | T | T | T |
| 0.25088880905800 | 0.68805221034100 | 0.01734213877670 | T | T | T |
| 0.25202161024800 | 0.35854324614700 | 0.01586654290900 | T | T | T |
| 0.74994875094800 | 0.02378357359400 | 0.01670447983580 | T | T | T |
| 0.74704360101100 | 0.68625649495900 | 0.01597255363900 | T | T | T |
| 0.74894257133100 | 0.35634819647400 | 0.01625281899750 | T | T | T |
| 0.12563309882400 | 0.16377524980800 | 0.06382811694340 | T | T | T |
| 0.12497571041300 | 0.83179509556200 | 0.06459099139100 | T | T | T |
| 0.12531116985900 | 0.49651773952200 | 0.06501934970900 | T | T | T |
| 0.62526910508200 | 0.16379379613800 | 0.06392319431310 | T | T | T |
| 0.62482233158100 | 0.83048531158700 | 0.06408365559670 | T | T | T |
| 0.62369903484400 | 0.49639832754000 | 0.06415877593020 | T | T | T |
| 0.00000000000000 | 0.00000000000000 | 0.13043999673400 | F | F | F |
| 0.00000000000000 | 0.66667002414000 | 0.13043999673400 | F | F | F |
| 0.00000000000000 | 0.33333000540000 | 0.13043999673400 | F | F | F |
| 0.50000000002500 | 0.00000000000000 | 0.13043999673400 | F | F | F |
| 0.50000000002500 | 0.66667002414000 | 0.13043999673400 | F | F | F |
| 0.50000000002500 | 0.33333000540000 | 0.13043999673400 | F | F | F |

|                  |                  |                  |   |   |   |
|------------------|------------------|------------------|---|---|---|
| 0.2499999998000  | 0.0000000000000  | 0.13043999673400 | F | F | F |
| 0.2499999998000  | 0.66667002414000 | 0.13043999673400 | F | F | F |
| 0.2499999998000  | 0.33333000540000 | 0.13043999673400 | F | F | F |
| 0.75000000026600 | 0.00000000000000 | 0.13043999673400 | F | F | F |
| 0.75000000026600 | 0.66667002414000 | 0.13043999673400 | F | F | F |
| 0.75000000026600 | 0.33333000540000 | 0.13043999673400 | F | F | F |
| 0.12561312470200 | 0.16371584568500 | 0.19711732987000 | T | T | T |
| 0.12497842824400 | 0.83185853502400 | 0.19627602674300 | T | T | T |
| 0.12530617812900 | 0.49654117070500 | 0.19580283282300 | T | T | T |
| 0.62526331317500 | 0.16371214709600 | 0.19703033250100 | T | T | T |
| 0.62483258622900 | 0.83055104456500 | 0.19680376068600 | T | T | T |
| 0.62372252876500 | 0.49628893241700 | 0.19676012684800 | T | T | T |
| 0.00002648303948 | 0.02472977109850 | 0.24425377184800 | T | T | T |
| 0.99912478690800 | 0.67650142177200 | 0.24713391120200 | T | T | T |
| 0.00004854656849 | 0.35496308549400 | 0.24388291566600 | T | T | T |
| 0.49995284696100 | 0.02423579384640 | 0.24419999979300 | T | T | T |
| 0.49857487647700 | 0.67421120081600 | 0.25282061689200 | T | T | T |
| 0.50144991773100 | 0.35540372743500 | 0.24449305701800 | T | T | T |
| 0.25017582125900 | 0.02405291038250 | 0.24431436581500 | T | T | T |
| 0.25092273431300 | 0.68802403867000 | 0.24352362471900 | T | T | T |
| 0.25201059809600 | 0.35858966410800 | 0.24492297315900 | T | T | T |
| 0.74994866348100 | 0.02376845399770 | 0.24425514562100 | T | T | T |
| 0.74712367401600 | 0.68624319589400 | 0.24474517513200 | T | T | T |
| 0.74893696127900 | 0.35630346797500 | 0.24456570478300 | T | T | T |
| 0.37493859683200 | 0.09212463568670 | 0.99525314237900 | T | T | T |
| 0.37456070156400 | 0.75632094777300 | 0.99714378629600 | T | T | T |
| 0.37749769512400 | 0.42649876661400 | 0.99533453683900 | T | T | T |
| 0.87484204896900 | 0.09191978364800 | 0.99518162877300 | T | T | T |
| 0.87500030028500 | 0.75206568623500 | 0.99704363474000 | T | T | T |
| 0.87607380212000 | 0.42468285089600 | 0.99594705701900 | T | T | T |

|                  |                  |                  |   |   |   |
|------------------|------------------|------------------|---|---|---|
| 0.3750000000400  | 0.08332999798400 | 0.13043999673400 | F | F | F |
| 0.3750000000400  | 0.7499999984900  | 0.13043999673400 | F | F | F |
| 0.3750000000400  | 0.41666999457100 | 0.13043999673400 | F | F | F |
| 0.87500000009500 | 0.08332999798400 | 0.13043999673400 | F | F | F |
| 0.87500000009500 | 0.7499999984900  | 0.13043999673400 | F | F | F |
| 0.87500000009500 | 0.41666999457100 | 0.13043999673400 | F | F | F |
| 0.37492882855100 | 0.09210184887080 | 0.26571761806800 | T | T | T |
| 0.37463339410200 | 0.75623461469000 | 0.26368784809500 | T | T | T |
| 0.37750160629500 | 0.42650324839300 | 0.26547951299200 | T | T | T |
| 0.87483320888100 | 0.09190542310780 | 0.26579982379900 | T | T | T |
| 0.87502275974700 | 0.75199100505800 | 0.26382354452800 | T | T | T |
| 0.87604891958600 | 0.42467001283400 | 0.26489958225900 | T | T | T |
| 0.12520819663600 | 0.09204683749260 | 0.99515733047200 | T | T | T |
| 0.12300395002100 | 0.75336482457700 | 0.99694464597700 | T | T | T |
| 0.12402790309300 | 0.42526918589300 | 0.99595316767900 | T | T | T |
| 0.62515077190300 | 0.09188593572280 | 0.99527837447300 | T | T | T |
| 0.62288347151700 | 0.75573583197000 | 0.99619015627800 | T | T | T |
| 0.62522965545300 | 0.42518785573100 | 0.99496474553200 | T | T | T |
| 0.00017326594488 | 0.24739803168800 | 0.06691408711020 | T | T | T |
| 0.99978892593700 | 0.91472703668600 | 0.06624596203170 | T | T | T |
| 0.00006361009777 | 0.57905146178600 | 0.06858273845210 | T | T | T |
| 0.50001259804000 | 0.24777722869800 | 0.06671527896220 | T | T | T |
| 0.49997263722300 | 0.91468487356800 | 0.06643115222050 | T | T | T |
| 0.50038960893100 | 0.58218518670500 | 0.06702250181380 | T | T | T |
| 0.25003558796500 | 0.24959142194100 | 0.06607466627560 | T | T | T |
| 0.25014915403400 | 0.91457014402000 | 0.06637754215140 | T | T | T |
| 0.25026760062200 | 0.58022490625500 | 0.06707900790080 | T | T | T |
| 0.75061001834500 | 0.24835071306400 | 0.06652492816420 | T | T | T |
| 0.75014696740500 | 0.91405179318600 | 0.06628291913250 | T | T | T |
| 0.74948981324200 | 0.58020430949500 | 0.06694536833640 | T | T | T |

|                  |                  |                  |   |   |   |
|------------------|------------------|------------------|---|---|---|
| 0.1250000002200  | 0.08332999798400 | 0.13043999673400 | F | F | F |
| 0.1250000002200  | 0.7499999984900  | 0.13043999673400 | F | F | F |
| 0.1250000002200  | 0.41666999457100 | 0.13043999673400 | F | F | F |
| 0.6249999998400  | 0.08332999798400 | 0.13043999673400 | F | F | F |
| 0.6249999998400  | 0.7499999984900  | 0.13043999673400 | F | F | F |
| 0.6249999998400  | 0.41666999457100 | 0.13043999673400 | F | F | F |
| 0.00017005392709 | 0.24737662757800 | 0.19398156432600 | T | T | T |
| 0.99978761773300 | 0.91479503909400 | 0.19467464263200 | T | T | T |
| 0.00005702819659 | 0.57903106892700 | 0.19225428008800 | T | T | T |
| 0.50001343319700 | 0.24772018536900 | 0.19415799296000 | T | T | T |
| 0.49996946380700 | 0.91475269791700 | 0.19447459712200 | T | T | T |
| 0.50041178526100 | 0.58204985092300 | 0.19371590957600 | T | T | T |
| 0.25003222324400 | 0.24953397335100 | 0.19480882391900 | T | T | T |
| 0.25016124505500 | 0.91461600370600 | 0.19451450350100 | T | T | T |
| 0.25026201042400 | 0.58021887365000 | 0.19376750066700 | T | T | T |
| 0.75061922169100 | 0.24826600728500 | 0.19433584621800 | T | T | T |
| 0.75017465199400 | 0.91410090701400 | 0.19462142030100 | T | T | T |
| 0.74950438976800 | 0.58009863991200 | 0.19386286625100 | T | T | T |
| 0.12522378371600 | 0.09203264015240 | 0.26581271753300 | T | T | T |
| 0.12302192932900 | 0.75334086106800 | 0.26387969391100 | T | T | T |
| 0.12404483064900 | 0.42531116276200 | 0.26487562381700 | T | T | T |
| 0.62515522405000 | 0.09186251244810 | 0.26569716260100 | T | T | T |
| 0.62292636646400 | 0.75559172176900 | 0.26458926912600 | T | T | T |
| 0.62524564607700 | 0.42509749784200 | 0.26593963379000 | T | T | T |
| 0.57752161441900 | 0.67667421719900 | 0.37977599645500 | T | T | T |
| 0.62646742320500 | 0.48237497250200 | 0.37225527399100 | T | T | T |
| 0.67879573164600 | 0.73342787058100 | 0.33922387375600 | T | T | T |
| 0.49613028019000 | 0.72805005906600 | 0.36954956100000 | T | T | T |
| 0.50169167475300 | 0.62622064748000 | 0.33722964291700 | T | T | T |
| 0.53275144743600 | 0.82887098564900 | 0.32951063567700 | T | T | T |



|                  |                  |                  |   |   |   |
|------------------|------------------|------------------|---|---|---|
| 0.43531844173900 | 0.81583988963700 | 0.32581955641100 | T | T | T |
| 0.70967484309400 | 0.75239614418900 | 0.38696407059200 | T | T | T |
| 0.45577409277800 | 0.55424860912000 | 0.30440479330100 | T | T | T |
| 0.62746988443700 | 0.48738381417700 | 0.39697169088600 | T | T | T |
| 0.57785562350800 | 0.67785372418800 | 0.88053415439200 | T | T | T |
| 0.62693502925800 | 0.48276296028300 | 0.88831365077000 | T | T | T |
| 0.67831834365300 | 0.73525644603000 | 0.92146328547600 | T | T | T |
| 0.49595418618500 | 0.72846481934700 | 0.89069912599400 | T | T | T |
| 0.50210979676900 | 0.62686214893800 | 0.92314349484100 | T | T | T |
| 0.53199852434800 | 0.82888576958400 | 0.93092948015900 | T | T | T |
| 0.43464860375500 | 0.81563400603400 | 0.93474072334700 | T | T | T |
| 0.70880969794200 | 0.75605776985200 | 0.87388815780900 | T | T | T |
| 0.45605913686300 | 0.55472150304700 | 0.95575981043200 | T | T | T |
| 0.62775323071600 | 0.48829963612400 | 0.86362588027500 | T | T | T |
| 0.09476478272800 | 0.67406376618700 | 0.37443213998500 | T | T | T |
| 0.18923918377500 | 0.72220641753300 | 0.33466294454500 | T | T | T |
| 0.00589241750826 | 0.72733421173600 | 0.36261745638500 | T | T | T |
| 0.01483504217490 | 0.62604391619200 | 0.35138396669600 | T | T | T |
| 0.03702643229710 | 0.81163552874300 | 0.32504482333200 | T | T | T |
| 0.93843127698100 | 0.79677878220500 | 0.32462946954400 | T | T | T |
| 0.23111266977000 | 0.71779903155700 | 0.38206948099500 | T | T | T |
| 0.95054548970900 | 0.53665195054400 | 0.30118453531800 | T | T | T |
| 0.05061889764190 | 0.53451635245100 | 0.29847591031500 | T | T | T |
| 0.09479738672250 | 0.67437481007000 | 0.88631927408800 | T | T | T |
| 0.18912180961000 | 0.72275211719900 | 0.92602413328900 | T | T | T |
| 0.00576240050289 | 0.72735922541300 | 0.89812454893000 | T | T | T |
| 0.01496116703810 | 0.62611533306500 | 0.90934298252900 | T | T | T |
| 0.03669630340040 | 0.81179615789800 | 0.93569200728500 | T | T | T |
| 0.93815462659300 | 0.79671629252500 | 0.93615621751000 | T | T | T |
| 0.23055364333000 | 0.71895334932800 | 0.87850487211000 | T | T | T |

|                  |                  |                  |   |   |   |
|------------------|------------------|------------------|---|---|---|
| 0.95058704503200 | 0.53673175634400 | 0.95947259168600 | T | T | T |
| 0.05064590762260 | 0.53450316288800 | 0.96223487246200 | T | T | T |
| 0.68535534659000 | 0.70932205217000 | 0.36887112742700 | T | T | T |
| 0.51413302751900 | 0.67116205087300 | 0.37667532230100 | T | T | T |
| 0.48132061891800 | 0.82383558709400 | 0.34808714967700 | T | T | T |
| 0.49834198266800 | 0.59813857685700 | 0.30531549729200 | T | T | T |
| 0.68527821840000 | 0.71208117369000 | 0.89161324306700 | T | T | T |
| 0.51454024293600 | 0.67172093315100 | 0.88362434096400 | T | T | T |
| 0.48049462816400 | 0.82388004993100 | 0.91241380045200 | T | T | T |
| 0.49847771158700 | 0.59874226426700 | 0.95504200665600 | T | T | T |
| 0.18976127241100 | 0.69127784711500 | 0.36269090421100 | T | T | T |
| 0.02885556701350 | 0.66792629276000 | 0.37477605214600 | T | T | T |
| 0.98834723577500 | 0.80258425092400 | 0.34566603735900 | T | T | T |
| 0.00190584697776 | 0.57206551422100 | 0.30580942314700 | T | T | T |
| 0.18971798566100 | 0.69191595705800 | 0.89796142524900 | T | T | T |
| 0.02888806353730 | 0.66807033607100 | 0.88597402320100 | T | T | T |
| 0.98802917822900 | 0.80260039428300 | 0.91509180912200 | T | T | T |
| 0.00198500686145 | 0.57210134838400 | 0.95487388879900 | T | T | T |

**5) Large supercell 1-H<sup>+</sup><sub>sol</sub> IS**

POSCAR

1

|                   |                   |                   |
|-------------------|-------------------|-------------------|
| 46.81727999995964 | 0.00000000000000  | 0.00000000000000  |
| 0.00000000000000  | 30.38812199999634 | 0.00000000000000  |
| 0.00000000000000  | 0.00000000000000  | 49.65722999997833 |

Ga P H O

540 540 180 72

Direct

|                  |                  |                  |   |   |   |
|------------------|------------------|------------------|---|---|---|
| 0.12716495848200 | 0.06476110613550 | 0.05671977226470 | T | T | T |
| 0.12716495849000 | 0.06476110613160 | 0.39005310560300 | T | T | T |

|                  |                  |                  |   |   |   |
|------------------|------------------|------------------|---|---|---|
| 0.12716495848000 | 0.06476110612640 | 0.72338643892800 | T | T | T |
| 0.46049910914800 | 0.06475542463550 | 0.05672164002330 | T | T | T |
| 0.46049910913700 | 0.06475542462590 | 0.39005497336100 | T | T | T |
| 0.46049910914600 | 0.06475542461550 | 0.72338830668100 | T | T | T |
| 0.79382868414500 | 0.06475639853170 | 0.05672002496170 | T | T | T |
| 0.79382868414000 | 0.06475639852300 | 0.39005335828900 | T | T | T |
| 0.79382868413900 | 0.06475639852470 | 0.72338669162700 | T | T | T |
| 0.12522128667000 | 0.06454674359510 | 0.27750460698200 | T | T | T |
| 0.12522128666200 | 0.06454674359310 | 0.61083794031900 | T | T | T |
| 0.12522128665700 | 0.06454674358360 | 0.94417127365000 | T | T | T |
| 0.45855534803300 | 0.06454339734640 | 0.27750459250100 | T | T | T |
| 0.45855534803300 | 0.06454339734250 | 0.61083792583300 | T | T | T |
| 0.45855534803600 | 0.06454339734520 | 0.94417125916800 | T | T | T |
| 0.79188689856700 | 0.06454242638450 | 0.27750519874900 | T | T | T |
| 0.79188689857300 | 0.06454242638830 | 0.61083853208100 | T | T | T |
| 0.79188689857200 | 0.06454242639070 | 0.94417186542700 | T | T | T |
| 0.12518341999300 | 0.06379250190770 | 0.16371552327500 | T | T | T |
| 0.12518341999600 | 0.06379250190910 | 0.49704885660900 | T | T | T |
| 0.12518341998600 | 0.06379250190500 | 0.83038218993700 | T | T | T |
| 0.45851983260500 | 0.06378715538730 | 0.16371465652700 | T | T | T |
| 0.45851983260500 | 0.06378715538820 | 0.49704798985900 | T | T | T |
| 0.45851983261100 | 0.06378715539000 | 0.83038132318800 | T | T | T |
| 0.79184960348000 | 0.06378771067770 | 0.16371390239300 | T | T | T |
| 0.79184960347800 | 0.06378771065720 | 0.49704723572900 | T | T | T |
| 0.79184960347800 | 0.06378771066550 | 0.83038056906400 | T | T | T |
| 0.29199838886500 | 0.06425502681530 | 0.05504018290400 | T | T | T |
| 0.29199838886500 | 0.06425502682440 | 0.38837351622900 | T | T | T |
| 0.29199838886700 | 0.06425502681300 | 0.72170684956600 | T | T | T |
| 0.62533256924600 | 0.06425799983340 | 0.05504130163400 | T | T | T |
| 0.62533256925000 | 0.06425799983790 | 0.38837463497300 | T | T | T |

|                  |                  |                  |   |   |   |
|------------------|------------------|------------------|---|---|---|
| 0.62533256924800 | 0.06425799983440 | 0.72170796829900 | T | T | T |
| 0.95866727523500 | 0.06425477861750 | 0.05504056188570 | T | T | T |
| 0.95866727523000 | 0.06425477861030 | 0.38837389521800 | T | T | T |
| 0.95866727523200 | 0.06425477861530 | 0.72170722855100 | T | T | T |
| 0.29180759475700 | 0.06437190019380 | 0.27750277570500 | T | T | T |
| 0.29180759475500 | 0.06437190018130 | 0.61083610903100 | T | T | T |
| 0.29180759476100 | 0.06437190017500 | 0.94416944237100 | T | T | T |
| 0.62514218881600 | 0.06437426885400 | 0.27750349218400 | T | T | T |
| 0.62514218881100 | 0.06437426885810 | 0.61083682551200 | T | T | T |
| 0.62514218881400 | 0.06437426885930 | 0.94417015884700 | T | T | T |
| 0.95847891605800 | 0.06437066258230 | 0.27750250406500 | T | T | T |
| 0.95847891605700 | 0.06437066258730 | 0.61083583739700 | T | T | T |
| 0.95847891605600 | 0.06437066258710 | 0.94416917073700 | T | T | T |
| 0.29206557313400 | 0.06421108379350 | 0.16569482625200 | T | T | T |
| 0.29206557312900 | 0.06421108379770 | 0.49902815958300 | T | T | T |
| 0.29206557313600 | 0.06421108378430 | 0.83236149291500 | T | T | T |
| 0.62539971246700 | 0.06421389677210 | 0.16569468393400 | T | T | T |
| 0.62539971246900 | 0.06421389676390 | 0.49902801727000 | T | T | T |
| 0.62539971247200 | 0.06421389676530 | 0.83236135060200 | T | T | T |
| 0.95873472299200 | 0.06421093100200 | 0.16569507344000 | T | T | T |
| 0.95873472299300 | 0.06421093101050 | 0.49902840677200 | T | T | T |
| 0.95873472299200 | 0.06421093100550 | 0.83236174010600 | T | T | T |
| 0.12718717356800 | 0.19598475768600 | 0.05674782142680 | T | T | T |
| 0.12718717356600 | 0.19598475767900 | 0.39008115476700 | T | T | T |
| 0.12718717356500 | 0.19598475769100 | 0.72341448809800 | T | T | T |
| 0.46052094345800 | 0.19598974501500 | 0.05674986215750 | T | T | T |
| 0.46052094346500 | 0.19598974501100 | 0.39008319548800 | T | T | T |
| 0.46052094346200 | 0.19598974501900 | 0.72341652881500 | T | T | T |
| 0.79385125114000 | 0.19598922901100 | 0.05674877016800 | T | T | T |
| 0.79385125113500 | 0.19598922900700 | 0.39008210349800 | T | T | T |

|                  |                  |                  |   |   |   |
|------------------|------------------|------------------|---|---|---|
| 0.79385125113500 | 0.19598922900900 | 0.72341543683600 | T | T | T |
| 0.12522986331200 | 0.19637165701600 | 0.27685421618500 | T | T | T |
| 0.12522986330300 | 0.19637165703700 | 0.61018754948400 | T | T | T |
| 0.12522986330400 | 0.19637165703700 | 0.94352088282800 | T | T | T |
| 0.45856416101600 | 0.19637568135000 | 0.27685097138400 | T | T | T |
| 0.45856416102000 | 0.19637568135500 | 0.61018430469200 | T | T | T |
| 0.45856416102400 | 0.19637568136000 | 0.94351763805000 | T | T | T |
| 0.79189570890300 | 0.19637652105800 | 0.27685328776800 | T | T | T |
| 0.79189570890600 | 0.19637652105800 | 0.61018662110300 | T | T | T |
| 0.79189570890900 | 0.19637652105500 | 0.94351995442000 | T | T | T |
| 0.12521080333400 | 0.19780653719800 | 0.16364269512500 | T | T | T |
| 0.12521080333200 | 0.19780653712800 | 0.49697602845800 | T | T | T |
| 0.12521080332500 | 0.19780653709400 | 0.83030936179500 | T | T | T |
| 0.45854633331100 | 0.19776924052600 | 0.16364745312600 | T | T | T |
| 0.45854633330900 | 0.19776924056400 | 0.49698078645700 | T | T | T |
| 0.45854633331800 | 0.19776924057500 | 0.83031411979100 | T | T | T |
| 0.79187663790700 | 0.19776883498500 | 0.16364550160800 | T | T | T |
| 0.79187663790800 | 0.19776883495800 | 0.49697883494500 | T | T | T |
| 0.79187663791200 | 0.19776883500700 | 0.83031216827500 | T | T | T |
| 0.29199722385500 | 0.19645762216000 | 0.05505442590990 | T | T | T |
| 0.29199722385700 | 0.19645762214400 | 0.38838775923600 | T | T | T |
| 0.29199722385300 | 0.19645762217000 | 0.72172109257200 | T | T | T |
| 0.62533125378400 | 0.19645436108400 | 0.05505595124330 | T | T | T |
| 0.62533125379300 | 0.19645436109500 | 0.38838928457200 | T | T | T |
| 0.62533125378900 | 0.19645436108500 | 0.72172261790400 | T | T | T |
| 0.95866637522900 | 0.19645776896500 | 0.05505473430490 | T | T | T |
| 0.95866637522800 | 0.19645776897100 | 0.38838806763800 | T | T | T |
| 0.95866637522900 | 0.19645776896200 | 0.72172140097000 | T | T | T |
| 0.29181660263200 | 0.19632895731100 | 0.27753552229900 | T | T | T |
| 0.29181660263600 | 0.19632895731800 | 0.61086885563100 | T | T | T |

|                  |                  |                  |   |   |   |
|------------------|------------------|------------------|---|---|---|
| 0.29181660264200 | 0.19632895732300 | 0.94420218896200 | T | T | T |
| 0.62515091258100 | 0.19632636374300 | 0.27753631284500 | T | T | T |
| 0.62515091257300 | 0.19632636374600 | 0.61086964616900 | T | T | T |
| 0.62515091257700 | 0.19632636374000 | 0.94420297951000 | T | T | T |
| 0.95848762402100 | 0.19633015640200 | 0.27753594445100 | T | T | T |
| 0.95848762402300 | 0.19633015639800 | 0.61086927778300 | T | T | T |
| 0.95848762401900 | 0.19633015640200 | 0.94420261111800 | T | T | T |
| 0.29205782091600 | 0.19651305177100 | 0.16572033298200 | T | T | T |
| 0.29205782091100 | 0.19651305175900 | 0.49905366631000 | T | T | T |
| 0.29205782091600 | 0.19651305177900 | 0.83238699964300 | T | T | T |
| 0.62539172601300 | 0.19651022739400 | 0.16572014741400 | T | T | T |
| 0.62539172601300 | 0.19651022738700 | 0.49905348075000 | T | T | T |
| 0.62539172601100 | 0.19651022738700 | 0.83238681408300 | T | T | T |
| 0.95872706843200 | 0.19651313739700 | 0.16572055293900 | T | T | T |
| 0.95872706843700 | 0.19651313740000 | 0.49905388627400 | T | T | T |
| 0.95872706843200 | 0.19651313740100 | 0.83238721960300 | T | T | T |
| 0.00064481396670 | 0.01560756707750 | 0.00755983149098 | T | T | T |
| 0.00064481396447 | 0.01560756708130 | 0.34089316481900 | T | T | T |
| 0.00064481396813 | 0.01560756708360 | 0.67422649815300 | T | T | T |
| 0.33397114536500 | 0.01560841779600 | 0.00755974296705 | T | T | T |
| 0.33397114536200 | 0.01560841780600 | 0.34089307630100 | T | T | T |
| 0.33397114536300 | 0.01560841780440 | 0.67422640963000 | T | T | T |
| 0.66730604314600 | 0.01560085407880 | 0.00755849641159 | T | T | T |
| 0.66730604314600 | 0.01560085407360 | 0.34089182975100 | T | T | T |
| 0.66730604314000 | 0.01560085407790 | 0.67422516308300 | T | T | T |
| 0.33243856300400 | 0.01556436660650 | 0.22990936551500 | T | T | T |
| 0.33243856300800 | 0.01556436660710 | 0.56324269883700 | T | T | T |
| 0.33243856300500 | 0.01556436658700 | 0.89657603218200 | T | T | T |
| 0.66577331929700 | 0.01555776853960 | 0.22990608305200 | T | T | T |
| 0.66577331929500 | 0.01555776853030 | 0.56323941638300 | T | T | T |

|                  |                  |                  |   |   |   |
|------------------|------------------|------------------|---|---|---|
| 0.66577331929400 | 0.01555776852110 | 0.89657274971900 | T | T | T |
| 0.99910994818300 | 0.01556422916490 | 0.22990801927700 | T | T | T |
| 0.99910994818300 | 0.01556422916930 | 0.56324135260200 | T | T | T |
| 0.99910994817800 | 0.01556422916460 | 0.89657468594200 | T | T | T |
| 0.00085328192544 | 0.01565454650370 | 0.11797206221000 | T | T | T |
| 0.00085328193121 | 0.01565454650930 | 0.45130539554500 | T | T | T |
| 0.00085328192467 | 0.01565454650640 | 0.78463872887700 | T | T | T |
| 0.33418300022300 | 0.01565413293050 | 0.11797335068500 | T | T | T |
| 0.33418300022100 | 0.01565413292300 | 0.45130668402000 | T | T | T |
| 0.33418300022200 | 0.01565413291430 | 0.78464001735000 | T | T | T |
| 0.66751789680600 | 0.01564832290740 | 0.11797033527100 | T | T | T |
| 0.66751789681000 | 0.01564832290910 | 0.45130366859400 | T | T | T |
| 0.66751789680900 | 0.01564832291150 | 0.78463700193200 | T | T | T |
| 0.16605134713800 | 0.01542972845910 | 0.00904657284412 | T | T | T |
| 0.16605134714500 | 0.01542972847020 | 0.34237990618600 | T | T | T |
| 0.16605134714400 | 0.01542972846620 | 0.67571323950300 | T | T | T |
| 0.49938894763600 | 0.01543361096240 | 0.00904960721803 | T | T | T |
| 0.49938894763900 | 0.01543361094650 | 0.34238294055100 | T | T | T |
| 0.49938894763400 | 0.01543361095380 | 0.67571627388000 | T | T | T |
| 0.83271929130400 | 0.01543603632030 | 0.00904982378043 | T | T | T |
| 0.83271929129900 | 0.01543603632980 | 0.34238315710900 | T | T | T |
| 0.83271929130000 | 0.01543603632560 | 0.67571649043400 | T | T | T |
| 0.16526961288900 | 0.01284485152320 | 0.22429352964400 | T | T | T |
| 0.16526961289100 | 0.01284485152250 | 0.55762686296300 | T | T | T |
| 0.16526961288200 | 0.01284485151120 | 0.89096019630200 | T | T | T |
| 0.49860654182700 | 0.01284518697950 | 0.22429422013500 | T | T | T |
| 0.49860654182800 | 0.01284518697970 | 0.55762755346600 | T | T | T |
| 0.49860654183000 | 0.01284518698340 | 0.89096088680100 | T | T | T |
| 0.83193658500700 | 0.01284692514310 | 0.22429465985500 | T | T | T |
| 0.83193658500100 | 0.01284692513040 | 0.55762799318400 | T | T | T |

|                  |                  |                  |   |   |   |
|------------------|------------------|------------------|---|---|---|
| 0.83193658500200 | 0.01284692513360 | 0.89096132652800 | T | T | T |
| 0.16323828146600 | 0.98065088767900 | 0.10307804749800 | T | T | T |
| 0.16323828146900 | 0.98065088768100 | 0.43641138082600 | T | T | T |
| 0.16323828146400 | 0.98065088767300 | 0.76974471416000 | T | T | T |
| 0.49656960024600 | 0.98066024312800 | 0.10307712162500 | T | T | T |
| 0.49656960025200 | 0.98066024312800 | 0.43641045495700 | T | T | T |
| 0.49656960025400 | 0.98066024312800 | 0.76974378829400 | T | T | T |
| 0.82990628447900 | 0.98066128857100 | 0.10307823992300 | T | T | T |
| 0.82990628448200 | 0.98066128857400 | 0.43641157324700 | T | T | T |
| 0.82990628448600 | 0.98066128857900 | 0.76974490658300 | T | T | T |
| 0.08352287596900 | 0.01577806964360 | 0.00756496198005 | T | T | T |
| 0.08352287597130 | 0.01577806964460 | 0.34089829531700 | T | T | T |
| 0.08352287597340 | 0.01577806964370 | 0.67423162864200 | T | T | T |
| 0.41685484180700 | 0.01578302428250 | 0.00756749251044 | T | T | T |
| 0.41685484180400 | 0.01578302429130 | 0.34090082584900 | T | T | T |
| 0.41685484180300 | 0.01578302428880 | 0.67423415917200 | T | T | T |
| 0.75018641290200 | 0.01577663471050 | 0.00756589004583 | T | T | T |
| 0.75018641289600 | 0.01577663470070 | 0.34089922336400 | T | T | T |
| 0.75018641290400 | 0.01577663471400 | 0.67423255670600 | T | T | T |
| 0.08115040435890 | 0.01586314855880 | 0.22819091120000 | T | T | T |
| 0.08115040435730 | 0.01586314855250 | 0.56152424452500 | T | T | T |
| 0.08115040434960 | 0.01586314853850 | 0.89485757786000 | T | T | T |
| 0.41448241409200 | 0.01586846593670 | 0.22819127084100 | T | T | T |
| 0.41448241409400 | 0.01586846593540 | 0.56152460417400 | T | T | T |
| 0.41448241409200 | 0.01586846592630 | 0.89485793750900 | T | T | T |
| 0.74781421267600 | 0.01586174339680 | 0.22818946889200 | T | T | T |
| 0.74781421267200 | 0.01586174337230 | 0.56152280222200 | T | T | T |
| 0.74781421267400 | 0.01586174337400 | 0.89485613555700 | T | T | T |
| 0.08343191573630 | 0.01261482012630 | 0.12016894867600 | T | T | T |
| 0.08343191574010 | 0.01261482013060 | 0.45350228201600 | T | T | T |



|                  |                  |                  |   |   |   |
|------------------|------------------|------------------|---|---|---|
| 0.08343191573860 | 0.01261482011920 | 0.78683561534200 | T | T | T |
| 0.41676378320400 | 0.01261902427180 | 0.12017346649800 | T | T | T |
| 0.41676378319600 | 0.01261902427000 | 0.45350679983900 | T | T | T |
| 0.41676378320500 | 0.01261902425280 | 0.78684013316500 | T | T | T |
| 0.75009687871600 | 0.01261519728520 | 0.12016947667400 | T | T | T |
| 0.75009687871800 | 0.01261519730770 | 0.45350281000300 | T | T | T |
| 0.75009687871900 | 0.01261519730310 | 0.78683614333600 | T | T | T |
| 0.24987528719000 | 0.01566576010960 | 0.00771193174267 | T | T | T |
| 0.24987528719100 | 0.01566576012250 | 0.34104526508100 | T | T | T |
| 0.24987528719200 | 0.01566576010670 | 0.67437859840600 | T | T | T |
| 0.58321154993100 | 0.01566354835400 | 0.00771113103553 | T | T | T |
| 0.58321154992800 | 0.01566354835900 | 0.34104446437400 | T | T | T |
| 0.58321154993200 | 0.01566354835700 | 0.67437779769600 | T | T | T |
| 0.91654537962500 | 0.01567077089070 | 0.00771471381440 | T | T | T |
| 0.91654537962800 | 0.01567077088970 | 0.34104804715400 | T | T | T |
| 0.91654537962400 | 0.01567077089060 | 0.67438138047500 | T | T | T |
| 0.25029457209500 | 0.01604800272750 | 0.22858233192000 | T | T | T |
| 0.25029457209200 | 0.01604800271480 | 0.56191566524800 | T | T | T |
| 0.25029457209400 | 0.01604800271310 | 0.89524899858200 | T | T | T |
| 0.58363269901300 | 0.01604598287800 | 0.22858114020200 | T | T | T |
| 0.58363269901600 | 0.01604598286850 | 0.56191447353300 | T | T | T |
| 0.58363269901500 | 0.01604598287220 | 0.89524780687500 | T | T | T |
| 0.91696611613200 | 0.01605091878960 | 0.22858337842900 | T | T | T |
| 0.91696611613100 | 0.01605091878470 | 0.56191671176400 | T | T | T |
| 0.91696611612700 | 0.01605091877970 | 0.89525004509600 | T | T | T |
| 0.25250798363500 | 0.01616524439710 | 0.11768436496400 | T | T | T |
| 0.25250798363300 | 0.01616524440990 | 0.45101769829500 | T | T | T |
| 0.25250798363000 | 0.01616524439890 | 0.78435103162500 | T | T | T |
| 0.58584412266300 | 0.01616186235620 | 0.11768482786200 | T | T | T |
| 0.58584412266900 | 0.01616186234610 | 0.45101816120100 | T | T | T |

|                  |                  |                  |   |   |   |
|------------------|------------------|------------------|---|---|---|
| 0.58584412267100 | 0.01616186234620 | 0.78435149453300 | T | T | T |
| 0.91917888384100 | 0.01616956495340 | 0.11768629733400 | T | T | T |
| 0.91917888384400 | 0.01616956495780 | 0.45101963067400 | T | T | T |
| 0.91917888385100 | 0.01616956494730 | 0.78435296400500 | T | T | T |
| 0.04311156615860 | 0.06422476035850 | 0.05527241891580 | T | T | T |
| 0.04311156616070 | 0.06422476036490 | 0.38860575224900 | T | T | T |
| 0.04311156615910 | 0.06422476035680 | 0.72193908558200 | T | T | T |
| 0.37644425010900 | 0.06422037048530 | 0.05527282284650 | T | T | T |
| 0.37644425009800 | 0.06422037049130 | 0.38860615617500 | T | T | T |
| 0.37644425010500 | 0.06422037047840 | 0.72193948951100 | T | T | T |
| 0.70977708447200 | 0.06422477263980 | 0.05527260193280 | T | T | T |
| 0.70977708447600 | 0.06422477263240 | 0.38860593526700 | T | T | T |
| 0.70977708447000 | 0.06422477263000 | 0.72193926859600 | T | T | T |
| 0.04144302332730 | 0.06426063098880 | 0.27666986355400 | T | T | T |
| 0.04144302331790 | 0.06426063098930 | 0.61000319688200 | T | T | T |
| 0.04144302331130 | 0.06426063098820 | 0.94333653021900 | T | T | T |
| 0.37477421333600 | 0.06425610544730 | 0.27666937291500 | T | T | T |
| 0.37477421334700 | 0.06425610543870 | 0.61000270624300 | T | T | T |
| 0.37477421335100 | 0.06425610543430 | 0.94333603958100 | T | T | T |
| 0.70810692552700 | 0.06426048739200 | 0.27667015291300 | T | T | T |
| 0.70810692552500 | 0.06426048738180 | 0.61000348624300 | T | T | T |
| 0.70810692552600 | 0.06426048738030 | 0.94333681957400 | T | T | T |
| 0.04142284455650 | 0.06424308105040 | 0.16580240021000 | T | T | T |
| 0.04142284455610 | 0.06424308105140 | 0.49913573354200 | T | T | T |
| 0.04142284454580 | 0.06424308105060 | 0.83246906687400 | T | T | T |
| 0.37475439934400 | 0.06423825007640 | 0.16580277868200 | T | T | T |
| 0.37475439934100 | 0.06423825007440 | 0.49913611201300 | T | T | T |
| 0.37475439934600 | 0.06423825007260 | 0.83246944534600 | T | T | T |
| 0.70808605645200 | 0.06424252156760 | 0.16580211702200 | T | T | T |
| 0.70808605644700 | 0.06424252158840 | 0.49913545034900 | T | T | T |

|                  |                  |                   |   |   |   |
|------------------|------------------|-------------------|---|---|---|
| 0.70808605644900 | 0.06424252158540 | 0.83246878368200  | T | T | T |
| 0.20602665483300 | 0.06448668937900 | 0.05551653370720  | T | T | T |
| 0.20602665483500 | 0.06448668939520 | 0.38884986703600  | T | T | T |
| 0.20602665483100 | 0.06448668937740 | 0.72218320037200  | T | T | T |
| 0.53936443184900 | 0.06448507477550 | 0.05551574650880  | T | T | T |
| 0.53936443184600 | 0.06448507477840 | 0.38884907983700  | T | T | T |
| 0.53936443185100 | 0.06448507477560 | 0.72218241316800  | T | T | T |
| 0.87269816796900 | 0.06448189920790 | 0.05551711834280  | T | T | T |
| 0.87269816796600 | 0.06448189921030 | 0.38885045167800  | T | T | T |
| 0.87269816796900 | 0.06448189921450 | 0.72218378500900  | T | T | T |
| 0.20787043127600 | 0.06436119220750 | 0.27775795878000  | T | T | T |
| 0.20787043127200 | 0.06436119219770 | 0.61109129210900  | T | T | T |
| 0.20787043127400 | 0.06436119219350 | 0.94442462544800  | T | T | T |
| 0.54120415406200 | 0.06435969263140 | 0.27775781363000  | T | T | T |
| 0.54120415406700 | 0.06435969262820 | 0.61109114696800  | T | T | T |
| 0.54120415406900 | 0.06435969263110 | 0.94442448030500  | T | T | T |
| 0.87453871350900 | 0.06435858985750 | 0.27775832979100  | T | T | T |
| 0.87453871351100 | 0.06435858984630 | 0.61109166312100  | T | T | T |
| 0.87453871350900 | 0.06435858984500 | 0.94442499645700  | T | T | T |
| 0.20811584424900 | 0.06666302512510 | 0.16579746747000  | T | T | T |
| 0.20811584425500 | 0.06666302512190 | 0.49913080080300  | T | T | T |
| 0.20811584424300 | 0.06666302511200 | 0.83246413412800  | T | T | T |
| 0.54145165677100 | 0.06666445771240 | 0.16579671624900  | T | T | T |
| 0.54145165677600 | 0.06666445770850 | 0.49913004958400  | T | T | T |
| 0.54145165678300 | 0.06666445770620 | 0.83246338291300  | T | T | T |
| 0.87478248448600 | 0.06666032239590 | 0.16579477347700  | T | T | T |
| 0.87478248449100 | 0.06666032239880 | 0.49912810680900  | T | T | T |
| 0.87478248449400 | 0.06666032239480 | 0.83246144013900  | T | T | T |
| 0.00000000000000 | 0.13043999673400 | 0.00000000000000  | F | F | F |
| 0.00000000000000 | 0.13043999673400 | 0.333333333333400 | F | F | F |

|                    |                  |                    |   |   |   |
|--------------------|------------------|--------------------|---|---|---|
| 0.0000000000000000 | 0.13043999673400 | 0.666666666666600  | F | F | F |
| 0.333333333333400  | 0.13043999673400 | 0.0000000000000000 | F | F | F |
| 0.333333333333400  | 0.13043999673400 | 0.333333333333400  | F | F | F |
| 0.333333333333400  | 0.13043999673400 | 0.666666666666600  | F | F | F |
| 0.666666666666600  | 0.13043999673400 | 0.0000000000000000 | F | F | F |
| 0.666666666666600  | 0.13043999673400 | 0.333333333333400  | F | F | F |
| 0.666666666666600  | 0.13043999673400 | 0.666666666666600  | F | F | F |
| 0.0000000000000000 | 0.13043999673400 | 0.22222334138000   | F | F | F |
| 0.0000000000000000 | 0.13043999673400 | 0.55555667471300   | F | F | F |
| 0.0000000000000000 | 0.13043999673400 | 0.88889000804700   | F | F | F |
| 0.333333333333400  | 0.13043999673400 | 0.22222334138000   | F | F | F |
| 0.333333333333400  | 0.13043999673400 | 0.55555667471300   | F | F | F |
| 0.333333333333400  | 0.13043999673400 | 0.88889000804700   | F | F | F |
| 0.666666666666600  | 0.13043999673400 | 0.22222334138000   | F | F | F |
| 0.666666666666600  | 0.13043999673400 | 0.55555667471300   | F | F | F |
| 0.666666666666600  | 0.13043999673400 | 0.88889000804700   | F | F | F |
| 0.0000000000000000 | 0.13043999673400 | 0.11111000180100   | F | F | F |
| 0.0000000000000000 | 0.13043999673400 | 0.44444333513300   | F | F | F |
| 0.0000000000000000 | 0.13043999673400 | 0.77777666846700   | F | F | F |
| 0.333333333333400  | 0.13043999673400 | 0.11111000180100   | F | F | F |
| 0.333333333333400  | 0.13043999673400 | 0.44444333513300   | F | F | F |
| 0.333333333333400  | 0.13043999673400 | 0.77777666846700   | F | F | F |
| 0.666666666666600  | 0.13043999673400 | 0.11111000180100   | F | F | F |
| 0.666666666666600  | 0.13043999673400 | 0.44444333513300   | F | F | F |
| 0.666666666666600  | 0.13043999673400 | 0.77777666846700   | F | F | F |
| 0.166666666667500  | 0.13043999673400 | 0.0000000000000000 | F | F | F |
| 0.166666666667500  | 0.13043999673400 | 0.333333333333400  | F | F | F |
| 0.166666666667500  | 0.13043999673400 | 0.666666666666600  | F | F | F |
| 0.500000000000900  | 0.13043999673400 | 0.0000000000000000 | F | F | F |
| 0.500000000000900  | 0.13043999673400 | 0.333333333333400  | F | F | F |

|                  |                  |                  |   |   |   |
|------------------|------------------|------------------|---|---|---|
| 0.50000000000900 | 0.13043999673400 | 0.66666666666600 | F | F | F |
| 0.83333333334100 | 0.13043999673400 | 0.00000000000000 | F | F | F |
| 0.83333333334100 | 0.13043999673400 | 0.33333333333400 | F | F | F |
| 0.83333333334100 | 0.13043999673400 | 0.66666666666600 | F | F | F |
| 0.16666666667500 | 0.13043999673400 | 0.22222334138000 | F | F | F |
| 0.16666666667500 | 0.13043999673400 | 0.55555667471300 | F | F | F |
| 0.16666666667500 | 0.13043999673400 | 0.88889000804700 | F | F | F |
| 0.50000000000900 | 0.13043999673400 | 0.22222334138000 | F | F | F |
| 0.50000000000900 | 0.13043999673400 | 0.55555667471300 | F | F | F |
| 0.50000000000900 | 0.13043999673400 | 0.88889000804700 | F | F | F |
| 0.83333333334100 | 0.13043999673400 | 0.22222334138000 | F | F | F |
| 0.83333333334100 | 0.13043999673400 | 0.55555667471300 | F | F | F |
| 0.83333333334100 | 0.13043999673400 | 0.88889000804700 | F | F | F |
| 0.16666666667500 | 0.13043999673400 | 0.11111000180100 | F | F | F |
| 0.16666666667500 | 0.13043999673400 | 0.44444333513300 | F | F | F |
| 0.16666666667500 | 0.13043999673400 | 0.77777666846700 | F | F | F |
| 0.50000000000900 | 0.13043999673400 | 0.11111000180100 | F | F | F |
| 0.50000000000900 | 0.13043999673400 | 0.44444333513300 | F | F | F |
| 0.50000000000900 | 0.13043999673400 | 0.77777666846700 | F | F | F |
| 0.83333333334100 | 0.13043999673400 | 0.11111000180100 | F | F | F |
| 0.83333333334100 | 0.13043999673400 | 0.44444333513300 | F | F | F |
| 0.83333333334100 | 0.13043999673400 | 0.77777666846700 | F | F | F |
| 0.08333333332670 | 0.13043999673400 | 0.00000000000000 | F | F | F |
| 0.08333333332670 | 0.13043999673400 | 0.33333333333400 | F | F | F |
| 0.08333333332670 | 0.13043999673400 | 0.66666666666600 | F | F | F |
| 0.41666666666100 | 0.13043999673400 | 0.00000000000000 | F | F | F |
| 0.41666666666100 | 0.13043999673400 | 0.33333333333400 | F | F | F |
| 0.41666666666100 | 0.13043999673400 | 0.66666666666600 | F | F | F |
| 0.74999999999300 | 0.13043999673400 | 0.00000000000000 | F | F | F |
| 0.74999999999300 | 0.13043999673400 | 0.33333333333400 | F | F | F |

|                 |                  |                  |   |   |   |
|-----------------|------------------|------------------|---|---|---|
| 0.7499999999300 | 0.13043999673400 | 0.66666666666600 | F | F | F |
| 0.0833333332670 | 0.13043999673400 | 0.22222334138000 | F | F | F |
| 0.0833333332670 | 0.13043999673400 | 0.55555667471300 | F | F | F |
| 0.0833333332670 | 0.13043999673400 | 0.88889000804700 | F | F | F |
| 0.4166666666100 | 0.13043999673400 | 0.22222334138000 | F | F | F |
| 0.4166666666100 | 0.13043999673400 | 0.55555667471300 | F | F | F |
| 0.4166666666100 | 0.13043999673400 | 0.88889000804700 | F | F | F |
| 0.7499999999300 | 0.13043999673400 | 0.22222334138000 | F | F | F |
| 0.7499999999300 | 0.13043999673400 | 0.55555667471300 | F | F | F |
| 0.7499999999300 | 0.13043999673400 | 0.88889000804700 | F | F | F |
| 0.0833333332670 | 0.13043999673400 | 0.11111000180100 | F | F | F |
| 0.0833333332670 | 0.13043999673400 | 0.44444333513300 | F | F | F |
| 0.0833333332670 | 0.13043999673400 | 0.77777666846700 | F | F | F |
| 0.4166666666100 | 0.13043999673400 | 0.11111000180100 | F | F | F |
| 0.4166666666100 | 0.13043999673400 | 0.44444333513300 | F | F | F |
| 0.4166666666100 | 0.13043999673400 | 0.77777666846700 | F | F | F |
| 0.7499999999300 | 0.13043999673400 | 0.11111000180100 | F | F | F |
| 0.7499999999300 | 0.13043999673400 | 0.44444333513300 | F | F | F |
| 0.7499999999300 | 0.13043999673400 | 0.77777666846700 | F | F | F |
| 0.2500000008900 | 0.13043999673400 | 0.00000000000000 | F | F | F |
| 0.2500000008900 | 0.13043999673400 | 0.33333333333400 | F | F | F |
| 0.2500000008900 | 0.13043999673400 | 0.66666666666600 | F | F | F |
| 0.5833333342100 | 0.13043999673400 | 0.00000000000000 | F | F | F |
| 0.5833333342100 | 0.13043999673400 | 0.33333333333400 | F | F | F |
| 0.5833333342100 | 0.13043999673400 | 0.66666666666600 | F | F | F |
| 0.9166666675500 | 0.13043999673400 | 0.00000000000000 | F | F | F |
| 0.9166666675500 | 0.13043999673400 | 0.33333333333400 | F | F | F |
| 0.9166666675500 | 0.13043999673400 | 0.66666666666600 | F | F | F |
| 0.2500000008900 | 0.13043999673400 | 0.22222334138000 | F | F | F |
| 0.2500000008900 | 0.13043999673400 | 0.55555667471300 | F | F | F |

|                  |                  |                  |   |   |   |
|------------------|------------------|------------------|---|---|---|
| 0.25000000008900 | 0.13043999673400 | 0.88889000804700 | F | F | F |
| 0.58333333342100 | 0.13043999673400 | 0.22222334138000 | F | F | F |
| 0.58333333342100 | 0.13043999673400 | 0.55555667471300 | F | F | F |
| 0.58333333342100 | 0.13043999673400 | 0.88889000804700 | F | F | F |
| 0.91666666675500 | 0.13043999673400 | 0.22222334138000 | F | F | F |
| 0.91666666675500 | 0.13043999673400 | 0.55555667471300 | F | F | F |
| 0.91666666675500 | 0.13043999673400 | 0.88889000804700 | F | F | F |
| 0.25000000008900 | 0.13043999673400 | 0.11111000180100 | F | F | F |
| 0.25000000008900 | 0.13043999673400 | 0.44444333513300 | F | F | F |
| 0.25000000008900 | 0.13043999673400 | 0.77777666846700 | F | F | F |
| 0.58333333342100 | 0.13043999673400 | 0.11111000180100 | F | F | F |
| 0.58333333342100 | 0.13043999673400 | 0.44444333513300 | F | F | F |
| 0.58333333342100 | 0.13043999673400 | 0.77777666846700 | F | F | F |
| 0.91666666675500 | 0.13043999673400 | 0.11111000180100 | F | F | F |
| 0.91666666675500 | 0.13043999673400 | 0.44444333513300 | F | F | F |
| 0.91666666675500 | 0.13043999673400 | 0.77777666846700 | F | F | F |
| 0.04311422860190 | 0.19649116710600 | 0.05527083176510 | T | T | T |
| 0.04311422860560 | 0.19649116710200 | 0.38860416509300 | T | T | T |
| 0.04311422860040 | 0.19649116710700 | 0.72193749842700 | T | T | T |
| 0.37644639889600 | 0.19649572192300 | 0.05527092950200 | T | T | T |
| 0.37644639888600 | 0.19649572192400 | 0.38860426283300 | T | T | T |
| 0.37644639889000 | 0.19649572192900 | 0.72193759616500 | T | T | T |
| 0.70977972882700 | 0.19649126284800 | 0.05527110183050 | T | T | T |
| 0.70977972882400 | 0.19649126284300 | 0.38860443515600 | T | T | T |
| 0.70977972882300 | 0.19649126284500 | 0.72193776849400 | T | T | T |
| 0.04146795189670 | 0.19644764533300 | 0.27679283621800 | T | T | T |
| 0.04146795189090 | 0.19644764532900 | 0.61012616955100 | T | T | T |
| 0.04146795188810 | 0.19644764532300 | 0.94345950289300 | T | T | T |
| 0.37479941008300 | 0.19645227693800 | 0.27679184035700 | T | T | T |
| 0.37479941008900 | 0.19645227694200 | 0.61012517368300 | T | T | T |

|                  |                  |                  |   |   |   |
|------------------|------------------|------------------|---|---|---|
| 0.37479941009400 | 0.19645227694000 | 0.94345850703500 | T | T | T |
| 0.70813201032000 | 0.19644785077100 | 0.27679246923600 | T | T | T |
| 0.70813201031800 | 0.19644785077600 | 0.61012580256800 | T | T | T |
| 0.70813201032000 | 0.19644785077400 | 0.94345913591400 | T | T | T |
| 0.04143791128880 | 0.19648127852600 | 0.16581901994900 | T | T | T |
| 0.04143791128460 | 0.19648127852400 | 0.49915235328400 | T | T | T |
| 0.04143791127690 | 0.19648127852900 | 0.83248568661200 | T | T | T |
| 0.37476867995700 | 0.19648561603200 | 0.16581898195300 | T | T | T |
| 0.37476867994800 | 0.19648561603400 | 0.49915231528700 | T | T | T |
| 0.37476867995700 | 0.19648561603800 | 0.83248564861400 | T | T | T |
| 0.70810106823000 | 0.19648150764300 | 0.16581845183900 | T | T | T |
| 0.70810106822500 | 0.19648150763400 | 0.49915178516900 | T | T | T |
| 0.70810106822400 | 0.19648150763000 | 0.83248511850400 | T | T | T |
| 0.20600703364100 | 0.19623089688500 | 0.05552586868050 | T | T | T |
| 0.20600703363900 | 0.19623089686500 | 0.38885920200700 | T | T | T |
| 0.20600703364100 | 0.19623089689200 | 0.72219253534500 | T | T | T |
| 0.53934413851700 | 0.19623271695900 | 0.05552495358980 | T | T | T |
| 0.53934413852500 | 0.19623271696200 | 0.38885828692300 | T | T | T |
| 0.53934413852100 | 0.19623271695700 | 0.72219162025500 | T | T | T |
| 0.87267789165800 | 0.19623628474000 | 0.05552624040340 | T | T | T |
| 0.87267789165800 | 0.19623628473500 | 0.38885957374200 | T | T | T |
| 0.87267789165900 | 0.19623628473800 | 0.72219290707100 | T | T | T |
| 0.20784372359900 | 0.19645580173400 | 0.27775092877500 | T | T | T |
| 0.20784372359000 | 0.19645580175200 | 0.61108426211000 | T | T | T |
| 0.20784372359000 | 0.19645580175600 | 0.94441759544300 | T | T | T |
| 0.54117715079800 | 0.19645759014300 | 0.27775038480800 | T | T | T |
| 0.54117715080200 | 0.19645759013300 | 0.61108371814200 | T | T | T |
| 0.54117715080200 | 0.19645759013600 | 0.94441705147600 | T | T | T |
| 0.87451161169500 | 0.19645810398600 | 0.27775110765400 | T | T | T |
| 0.87451161169900 | 0.19645810398100 | 0.61108444097900 | T | T | T |



|                  |                  |                  |   |   |   |
|------------------|------------------|------------------|---|---|---|
| 0.87451161169700 | 0.19645810398400 | 0.94441777431700 | T | T | T |
| 0.20810412929400 | 0.19563840023400 | 0.16564219961200 | T | T | T |
| 0.20810412929300 | 0.19563840022800 | 0.49897553294000 | T | T | T |
| 0.20810412929400 | 0.19563840024900 | 0.83230886626900 | T | T | T |
| 0.54144127888700 | 0.19563712805200 | 0.16564069540200 | T | T | T |
| 0.54144127888400 | 0.19563712804800 | 0.49897402874000 | T | T | T |
| 0.54144127888900 | 0.19563712805000 | 0.83230736207300 | T | T | T |
| 0.87477222557600 | 0.19563943394700 | 0.16563910527200 | T | T | T |
| 0.87477222558300 | 0.19563943394700 | 0.49897243860800 | T | T | T |
| 0.87477222558600 | 0.19563943394400 | 0.83230577193900 | T | T | T |
| 0.00064920483965 | 0.24505980382300 | 0.00760936899772 | T | T | T |
| 0.00064920483858 | 0.24505980382600 | 0.34094270233300 | T | T | T |
| 0.00064920484087 | 0.24505980381600 | 0.67427603566200 | T | T | T |
| 0.33397582927200 | 0.24505916893300 | 0.00760908788085 | T | T | T |
| 0.33397582926500 | 0.24505916893000 | 0.34094242121100 | T | T | T |
| 0.33397582927100 | 0.24505916893400 | 0.67427575453400 | T | T | T |
| 0.66731077761800 | 0.24506602926000 | 0.00760755906220 | T | T | T |
| 0.66731077762400 | 0.24506602927100 | 0.34094089239400 | T | T | T |
| 0.66731077761900 | 0.24506602926300 | 0.67427422572200 | T | T | T |
| 0.33244919089700 | 0.24508003960500 | 0.22995642318100 | T | T | T |
| 0.33244919089300 | 0.24508003960900 | 0.56328975650900 | T | T | T |
| 0.33244919089800 | 0.24508003962300 | 0.89662308984800 | T | T | T |
| 0.66578378261400 | 0.24508601477100 | 0.22995291495200 | T | T | T |
| 0.66578378261100 | 0.24508601476500 | 0.56328624828600 | T | T | T |
| 0.66578378261000 | 0.24508601476300 | 0.89661958162100 | T | T | T |
| 0.99912057642100 | 0.24507983283800 | 0.22995545953600 | T | T | T |
| 0.99912057641500 | 0.24507983282900 | 0.56328879286200 | T | T | T |
| 0.99912057641300 | 0.24507983283300 | 0.89662212619500 | T | T | T |
| 0.00087211288998 | 0.24500959924800 | 0.11801201785200 | T | T | T |
| 0.00087211289335 | 0.24500959925600 | 0.45134535118900 | T | T | T |

|                  |                  |                  |   |   |   |
|------------------|------------------|------------------|---|---|---|
| 0.00087211288792 | 0.24500959924700 | 0.78467868452300 | T | T | T |
| 0.33420221179900 | 0.24501056611800 | 0.11801359217400 | T | T | T |
| 0.33420221179500 | 0.24501056612900 | 0.45134692550700 | T | T | T |
| 0.33420221180400 | 0.24501056613000 | 0.78468025883500 | T | T | T |
| 0.66753702314100 | 0.24501588327600 | 0.11801020756200 | T | T | T |
| 0.66753702314200 | 0.24501588328900 | 0.45134354089500 | T | T | T |
| 0.66753702314100 | 0.24501588328400 | 0.78467687422500 | T | T | T |
| 0.16602536989800 | 0.24517686969600 | 0.00899005732101 | T | T | T |
| 0.16602536990200 | 0.24517686969700 | 0.34232339065400 | T | T | T |
| 0.16602536989300 | 0.24517686969400 | 0.67565672397800 | T | T | T |
| 0.49936366314700 | 0.24517328534300 | 0.00899300341712 | T | T | T |
| 0.49936366315200 | 0.24517328535700 | 0.34232633675700 | T | T | T |
| 0.49936366315000 | 0.24517328534500 | 0.67565967007600 | T | T | T |
| 0.83269296966100 | 0.24517152589400 | 0.00899321917309 | T | T | T |
| 0.83269296965500 | 0.24517152589800 | 0.34232655251100 | T | T | T |
| 0.83269296965800 | 0.24517152589300 | 0.67565988584500 | T | T | T |
| 0.16534840530800 | 0.24823905189600 | 0.22450863884600 | T | T | T |
| 0.16534840530500 | 0.24823905192000 | 0.55784197216300 | T | T | T |
| 0.16534840529700 | 0.24823905192300 | 0.89117530549500 | T | T | T |
| 0.49868456961300 | 0.24823632607400 | 0.22450619097500 | T | T | T |
| 0.49868456961800 | 0.24823632608800 | 0.55783952429700 | T | T | T |
| 0.49868456961800 | 0.24823632608700 | 0.89117285765000 | T | T | T |
| 0.83201513838800 | 0.24823393232600 | 0.22450651688800 | T | T | T |
| 0.83201513838500 | 0.24823393231300 | 0.55783985021400 | T | T | T |
| 0.83201513839100 | 0.24823393231400 | 0.89117318355200 | T | T | T |
| 0.16315555908400 | 0.28008531723900 | 0.10302490523300 | T | T | T |
| 0.16315555908000 | 0.28008531722400 | 0.43635823856400 | T | T | T |
| 0.16315555907300 | 0.28008531725000 | 0.76969157189200 | T | T | T |
| 0.49648537404700 | 0.28007556216800 | 0.10302628603700 | T | T | T |
| 0.49648537405400 | 0.28007556216300 | 0.43635961937100 | T | T | T |

|                  |                  |                  |   |   |   |
|------------------|------------------|------------------|---|---|---|
| 0.49648537405400 | 0.28007556216600 | 0.76969295270600 | T | T | T |
| 0.82982209323800 | 0.28007715949600 | 0.10302732410200 | T | T | T |
| 0.82982209324400 | 0.28007715949800 | 0.43636065743800 | T | T | T |
| 0.82982209324800 | 0.28007715948900 | 0.76969399077300 | T | T | T |
| 0.08355202784280 | 0.24482524437300 | 0.00754090269052 | T | T | T |
| 0.08355202784490 | 0.24482524438100 | 0.34087423602600 | T | T | T |
| 0.08355202784050 | 0.24482524436700 | 0.67420756935000 | T | T | T |
| 0.41688428527800 | 0.24481984383500 | 0.00754293758438 | T | T | T |
| 0.41688428527400 | 0.24481984382000 | 0.34087627092000 | T | T | T |
| 0.41688428528100 | 0.24481984382700 | 0.67420960424100 | T | T | T |
| 0.75021541002500 | 0.24482615818900 | 0.00754151932573 | T | T | T |
| 0.75021541002200 | 0.24482615818500 | 0.34087485266000 | T | T | T |
| 0.75021541002300 | 0.24482615818800 | 0.67420818599500 | T | T | T |
| 0.08116957885330 | 0.24489344035000 | 0.22822790630900 | T | T | T |
| 0.08116957885060 | 0.24489344035400 | 0.56156123963100 | T | T | T |
| 0.08116957884910 | 0.24489344035900 | 0.89489457297000 | T | T | T |
| 0.41450221642500 | 0.24488766756100 | 0.22822791211400 | T | T | T |
| 0.41450221642500 | 0.24488766756700 | 0.56156124544300 | T | T | T |
| 0.41450221643000 | 0.24488766757000 | 0.89489457878000 | T | T | T |
| 0.74783402824800 | 0.24489421733300 | 0.22822606738800 | T | T | T |
| 0.74783402824700 | 0.24489421733100 | 0.56155940072000 | T | T | T |
| 0.74783402824600 | 0.24489421733300 | 0.89489273405100 | T | T | T |
| 0.08342921474830 | 0.24812300671100 | 0.12015492624500 | T | T | T |
| 0.08342921475000 | 0.24812300672900 | 0.45348825959000 | T | T | T |
| 0.08342921474580 | 0.24812300672300 | 0.78682159292400 | T | T | T |
| 0.41676316952800 | 0.24811488400200 | 0.12016335396700 | T | T | T |
| 0.41676316952700 | 0.24811488401000 | 0.45349668729600 | T | T | T |
| 0.41676316953200 | 0.24811488401500 | 0.78683002062600 | T | T | T |
| 0.75009593281000 | 0.24811954564500 | 0.12015852256000 | T | T | T |
| 0.75009593281100 | 0.24811954564600 | 0.45349185588900 | T | T | T |

|                  |                  |                  |   |   |   |
|------------------|------------------|------------------|---|---|---|
| 0.75009593280800 | 0.24811954564700 | 0.78682518922500 | T | T | T |
| 0.24987022374000 | 0.24496946313600 | 0.00775736886171 | T | T | T |
| 0.24987022374000 | 0.24496946313000 | 0.34109070219800 | T | T | T |
| 0.24987022373900 | 0.24496946313400 | 0.67442403552800 | T | T | T |
| 0.58320678698000 | 0.24497151743600 | 0.00775672258044 | T | T | T |
| 0.58320678698300 | 0.24497151743800 | 0.34109005591300 | T | T | T |
| 0.58320678698100 | 0.24497151743100 | 0.67442338924700 | T | T | T |
| 0.91654035591400 | 0.24496475579700 | 0.00776004380119 | T | T | T |
| 0.91654035591200 | 0.24496475579500 | 0.34109337713600 | T | T | T |
| 0.91654035591500 | 0.24496475579700 | 0.67442671046000 | T | T | T |
| 0.25027248203600 | 0.24473298150300 | 0.22871768815600 | T | T | T |
| 0.25027248203000 | 0.24473298151500 | 0.56205102147400 | T | T | T |
| 0.25027248203400 | 0.24473298152800 | 0.89538435481300 | T | T | T |
| 0.58361020478000 | 0.24473571613300 | 0.22871568054400 | T | T | T |
| 0.58361020478300 | 0.24473571612300 | 0.56204901386600 | T | T | T |
| 0.58361020478500 | 0.24473571613100 | 0.89538234722200 | T | T | T |
| 0.91694363125400 | 0.24472881987900 | 0.22871817346700 | T | T | T |
| 0.91694363125400 | 0.24472881987200 | 0.56205150679900 | T | T | T |
| 0.91694363125900 | 0.24472881987800 | 0.89538484014300 | T | T | T |
| 0.25257578026400 | 0.24462847480600 | 0.11767034063500 | T | T | T |
| 0.25257578026800 | 0.24462847479200 | 0.45100367396200 | T | T | T |
| 0.25257578026200 | 0.24462847481100 | 0.78433700729200 | T | T | T |
| 0.58591285737800 | 0.24463170736300 | 0.11767095118600 | T | T | T |
| 0.58591285738500 | 0.24463170735100 | 0.45100428452300 | T | T | T |
| 0.58591285738300 | 0.24463170735800 | 0.78433761785500 | T | T | T |
| 0.91924707229000 | 0.24462380432600 | 0.11767212751000 | T | T | T |
| 0.91924707228700 | 0.24462380432100 | 0.45100546084400 | T | T | T |
| 0.91924707228800 | 0.24462380432000 | 0.78433879417500 | T | T | T |
| 0.12452830845400 | 0.99567256464900 | 0.03172666868870 | T | T | T |
| 0.12452830846000 | 0.99567256464900 | 0.36506000203100 | T | T | T |

|                  |                  |                  |   |   |   |
|------------------|------------------|------------------|---|---|---|
| 0.12452830846000 | 0.99567256464800 | 0.69839333535200 | T | T | T |
| 0.45786365369900 | 0.99566994053100 | 0.03172269746940 | T | T | T |
| 0.45786365369300 | 0.99566994051900 | 0.36505603080200 | T | T | T |
| 0.45786365369300 | 0.99566994051700 | 0.69838936412500 | T | T | T |
| 0.79119476056000 | 0.99566988607400 | 0.03172314635670 | T | T | T |
| 0.79119476055600 | 0.99566988607700 | 0.36505647968600 | T | T | T |
| 0.79119476055900 | 0.99566988606800 | 0.69838981301600 | T | T | T |
| 0.12418369951000 | 0.99856814796600 | 0.25067073768900 | T | T | T |
| 0.12418369951600 | 0.99856814797900 | 0.58400407102300 | T | T | T |
| 0.12418369950300 | 0.99856814796100 | 0.91733740435800 | T | T | T |
| 0.45751693727400 | 0.99857304888600 | 0.25066863988400 | T | T | T |
| 0.45751693727600 | 0.99857304888500 | 0.58400197321600 | T | T | T |
| 0.45751693728000 | 0.99857304888700 | 0.91733530655600 | T | T | T |
| 0.79084794860400 | 0.99856700974100 | 0.25067031166400 | T | T | T |
| 0.79084794860500 | 0.99856700973300 | 0.58400364499400 | T | T | T |
| 0.79084794860500 | 0.99856700974300 | 0.91733697833700 | T | T | T |
| 0.12579761597800 | 0.99547695641400 | 0.14181216917300 | T | T | T |
| 0.12579761598200 | 0.99547695641100 | 0.47514550251300 | T | T | T |
| 0.12579761597700 | 0.99547695640900 | 0.80847883584000 | T | T | T |
| 0.45912979921000 | 0.99547637892600 | 0.14181071597600 | T | T | T |
| 0.45912979920900 | 0.99547637892300 | 0.47514404931500 | T | T | T |
| 0.45912979921400 | 0.99547637891700 | 0.80847738264900 | T | T | T |
| 0.79245982839900 | 0.99547420294000 | 0.14181203591600 | T | T | T |
| 0.79245982839700 | 0.99547420293900 | 0.47514536925100 | T | T | T |
| 0.79245982839700 | 0.99547420293900 | 0.80847870258900 | T | T | T |
| 0.29195957243200 | 0.99579399118300 | 0.03058050116430 | T | T | T |
| 0.29195957243400 | 0.99579399118900 | 0.36391383450200 | T | T | T |
| 0.29195957243100 | 0.99579399118100 | 0.69724716782200 | T | T | T |
| 0.62529447396400 | 0.99579345569800 | 0.03058251509480 | T | T | T |
| 0.62529447396400 | 0.99579345569700 | 0.36391584843000 | T | T | T |

|                  |                  |                  |   |   |   |
|------------------|------------------|------------------|---|---|---|
| 0.62529447396100 | 0.99579345569900 | 0.69724918175900 | T | T | T |
| 0.95863132586100 | 0.99579710663900 | 0.03057943611020 | T | T | T |
| 0.95863132585800 | 0.99579710663400 | 0.36391276944700 | T | T | T |
| 0.95863132586000 | 0.99579710664000 | 0.69724610277000 | T | T | T |
| 0.29079290634500 | 0.99525591155500 | 0.25310866354100 | T | T | T |
| 0.29079290635000 | 0.99525591155400 | 0.58644199686800 | T | T | T |
| 0.29079290634300 | 0.99525591154400 | 0.91977533021400 | T | T | T |
| 0.62412943683900 | 0.99525572014300 | 0.25311144196100 | T | T | T |
| 0.62412943684000 | 0.99525572014100 | 0.58644477529200 | T | T | T |
| 0.62412943683800 | 0.99525572014400 | 0.91977810863100 | T | T | T |
| 0.95746629209400 | 0.99525595898100 | 0.25310746667100 | T | T | T |
| 0.95746629209600 | 0.99525595898800 | 0.58644079999900 | T | T | T |
| 0.95746629209300 | 0.99525595899300 | 0.91977413334200 | T | T | T |
| 0.29268404552600 | 0.99515804017600 | 0.14170532235800 | T | T | T |
| 0.29268404552000 | 0.99515804018200 | 0.47503865569800 | T | T | T |
| 0.29268404552000 | 0.99515804016300 | 0.80837198901900 | T | T | T |
| 0.62602064918800 | 0.99515681494900 | 0.14170703843300 | T | T | T |
| 0.62602064919000 | 0.99515681495000 | 0.47504037176900 | T | T | T |
| 0.62602064919100 | 0.99515681495600 | 0.80837370510300 | T | T | T |
| 0.95935644624200 | 0.99515912437700 | 0.14170496955800 | T | T | T |
| 0.95935644624800 | 0.99515912438100 | 0.47503830289300 | T | T | T |
| 0.95935644624900 | 0.99515912437700 | 0.80837163623100 | T | T | T |
| 0.12500000000200 | 0.13043999673400 | 0.02777666599470 | F | F | F |
| 0.12500000000200 | 0.13043999673400 | 0.36110999932900 | F | F | F |
| 0.12500000000200 | 0.13043999673400 | 0.69444333266100 | F | F | F |
| 0.45833333333400 | 0.13043999673400 | 0.02777666599470 | F | F | F |
| 0.45833333333400 | 0.13043999673400 | 0.36110999932900 | F | F | F |
| 0.45833333333400 | 0.13043999673400 | 0.69444333266100 | F | F | F |
| 0.79166666666800 | 0.13043999673400 | 0.02777666599470 | F | F | F |
| 0.79166666666800 | 0.13043999673400 | 0.36110999932900 | F | F | F |

|                  |                  |                  |   |   |   |
|------------------|------------------|------------------|---|---|---|
| 0.79166666666800 | 0.13043999673400 | 0.69444333266100 | F | F | F |
| 0.12500000000200 | 0.13043999673400 | 0.24999999994900 | F | F | F |
| 0.12500000000200 | 0.13043999673400 | 0.58333333328300 | F | F | F |
| 0.12500000000200 | 0.13043999673400 | 0.91666666661700 | F | F | F |
| 0.45833333333400 | 0.13043999673400 | 0.24999999994900 | F | F | F |
| 0.45833333333400 | 0.13043999673400 | 0.58333333328300 | F | F | F |
| 0.45833333333400 | 0.13043999673400 | 0.91666666661700 | F | F | F |
| 0.79166666666800 | 0.13043999673400 | 0.24999999994900 | F | F | F |
| 0.79166666666800 | 0.13043999673400 | 0.58333333328300 | F | F | F |
| 0.79166666666800 | 0.13043999673400 | 0.91666666661700 | F | F | F |
| 0.12500000000200 | 0.13043999673400 | 0.13888999819000 | F | F | F |
| 0.12500000000200 | 0.13043999673400 | 0.47222333152400 | F | F | F |
| 0.12500000000200 | 0.13043999673400 | 0.80555666485600 | F | F | F |
| 0.45833333333400 | 0.13043999673400 | 0.13888999819000 | F | F | F |
| 0.45833333333400 | 0.13043999673400 | 0.47222333152400 | F | F | F |
| 0.45833333333400 | 0.13043999673400 | 0.80555666485600 | F | F | F |
| 0.79166666666800 | 0.13043999673400 | 0.13888999819000 | F | F | F |
| 0.79166666666800 | 0.13043999673400 | 0.47222333152400 | F | F | F |
| 0.79166666666800 | 0.13043999673400 | 0.80555666485600 | F | F | F |
| 0.29166666669900 | 0.13043999673400 | 0.02777666599470 | F | F | F |
| 0.29166666669900 | 0.13043999673400 | 0.36110999932900 | F | F | F |
| 0.29166666669900 | 0.13043999673400 | 0.69444333266100 | F | F | F |
| 0.62500000003100 | 0.13043999673400 | 0.02777666599470 | F | F | F |
| 0.62500000003100 | 0.13043999673400 | 0.36110999932900 | F | F | F |
| 0.62500000003100 | 0.13043999673400 | 0.69444333266100 | F | F | F |
| 0.95833333336500 | 0.13043999673400 | 0.02777666599470 | F | F | F |
| 0.95833333336500 | 0.13043999673400 | 0.36110999932900 | F | F | F |
| 0.95833333336500 | 0.13043999673400 | 0.69444333266100 | F | F | F |
| 0.29166666669900 | 0.13043999673400 | 0.24999999994900 | F | F | F |
| 0.29166666669900 | 0.13043999673400 | 0.58333333328300 | F | F | F |

|                  |                  |                  |   |   |   |
|------------------|------------------|------------------|---|---|---|
| 0.29166666669900 | 0.13043999673400 | 0.91666666661700 | F | F | F |
| 0.62500000003100 | 0.13043999673400 | 0.24999999994900 | F | F | F |
| 0.62500000003100 | 0.13043999673400 | 0.58333333328300 | F | F | F |
| 0.62500000003100 | 0.13043999673400 | 0.91666666661700 | F | F | F |
| 0.95833333336500 | 0.13043999673400 | 0.24999999994900 | F | F | F |
| 0.95833333336500 | 0.13043999673400 | 0.58333333328300 | F | F | F |
| 0.95833333336500 | 0.13043999673400 | 0.91666666661700 | F | F | F |
| 0.29166666669900 | 0.13043999673400 | 0.13888999819000 | F | F | F |
| 0.29166666669900 | 0.13043999673400 | 0.47222333152400 | F | F | F |
| 0.29166666669900 | 0.13043999673400 | 0.80555666485600 | F | F | F |
| 0.62500000003100 | 0.13043999673400 | 0.13888999819000 | F | F | F |
| 0.62500000003100 | 0.13043999673400 | 0.47222333152400 | F | F | F |
| 0.62500000003100 | 0.13043999673400 | 0.80555666485600 | F | F | F |
| 0.95833333336500 | 0.13043999673400 | 0.13888999819000 | F | F | F |
| 0.95833333336500 | 0.13043999673400 | 0.47222333152400 | F | F | F |
| 0.95833333336500 | 0.13043999673400 | 0.80555666485600 | F | F | F |
| 0.12454769239300 | 0.26508666341900 | 0.03170901921200 | T | T | T |
| 0.12454769240200 | 0.26508666341800 | 0.36504235255200 | T | T | T |
| 0.12454769239400 | 0.26508666341700 | 0.69837568587300 | T | T | T |
| 0.45788347932900 | 0.26508749239400 | 0.03170525373660 | T | T | T |
| 0.45788347932500 | 0.26508749239600 | 0.36503858707500 | T | T | T |
| 0.45788347932600 | 0.26508749239800 | 0.69837192039800 | T | T | T |
| 0.79121367433300 | 0.26508806224900 | 0.03170580944760 | T | T | T |
| 0.79121367432800 | 0.26508806225600 | 0.36503914278400 | T | T | T |
| 0.79121367432700 | 0.26508806225700 | 0.69837247611400 | T | T | T |
| 0.12418064267500 | 0.26311262025800 | 0.25063658089700 | T | T | T |
| 0.12418064266900 | 0.26311262028400 | 0.58396991421700 | T | T | T |
| 0.12418064266500 | 0.26311262027800 | 0.91730324755500 | T | T | T |
| 0.45751497384900 | 0.26310859191200 | 0.25063180663200 | T | T | T |
| 0.45751497385200 | 0.26310859192600 | 0.58396513995400 | T | T | T |



|                  |                  |                  |   |   |   |
|------------------|------------------|------------------|---|---|---|
| 0.45751497385300 | 0.26310859192300 | 0.91729847330400 | T | T | T |
| 0.79084653240400 | 0.26311371944600 | 0.25063346313600 | T | T | T |
| 0.79084653240700 | 0.26311371944800 | 0.58396679646500 | T | T | T |
| 0.79084653240800 | 0.26311371945600 | 0.91730012979900 | T | T | T |
| 0.12565658953300 | 0.26615626943200 | 0.14178584771100 | T | T | T |
| 0.12565658954400 | 0.26615626938300 | 0.47511918106100 | T | T | T |
| 0.12565658954000 | 0.26615626936000 | 0.80845251439800 | T | T | T |
| 0.45899347321700 | 0.26612311235700 | 0.14179075778200 | T | T | T |
| 0.45899347321700 | 0.26612311238400 | 0.47512409111300 | T | T | T |
| 0.45899347322400 | 0.26612311239300 | 0.80845742444700 | T | T | T |
| 0.79232256937800 | 0.26612699108400 | 0.14179202361100 | T | T | T |
| 0.79232256937800 | 0.26612699106600 | 0.47512535695100 | T | T | T |
| 0.79232256937600 | 0.26612699109600 | 0.80845869028100 | T | T | T |
| 0.29195209673200 | 0.26499349974800 | 0.03059859725030 | T | T | T |
| 0.29195209672700 | 0.26499349973900 | 0.36393193059200 | T | T | T |
| 0.29195209673100 | 0.26499349975600 | 0.69726526390800 | T | T | T |
| 0.62528745316900 | 0.26499261293700 | 0.03060080403870 | T | T | T |
| 0.62528745317700 | 0.26499261294000 | 0.36393413736700 | T | T | T |
| 0.62528745317200 | 0.26499261293800 | 0.69726747069900 | T | T | T |
| 0.95862370191200 | 0.26499007362800 | 0.03059757561770 | T | T | T |
| 0.95862370190400 | 0.26499007363300 | 0.36393090895300 | T | T | T |
| 0.95862370190900 | 0.26499007362700 | 0.69726424228200 | T | T | T |
| 0.29083845985700 | 0.26552107203300 | 0.25316686991900 | T | T | T |
| 0.29083845985400 | 0.26552107202000 | 0.58650020325000 | T | T | T |
| 0.29083845985800 | 0.26552107204000 | 0.91983353658900 | T | T | T |
| 0.62417482511700 | 0.26552028829300 | 0.25316926747400 | T | T | T |
| 0.62417482511400 | 0.26552028829500 | 0.58650260080500 | T | T | T |
| 0.62417482511900 | 0.26552028829500 | 0.91983593414600 | T | T | T |
| 0.95751095893400 | 0.26551958050400 | 0.25316523597000 | T | T | T |
| 0.95751095893600 | 0.26551958050400 | 0.58649856929600 | T | T | T |

|                  |                  |                  |   |   |   |
|------------------|------------------|------------------|---|---|---|
| 0.95751095893900 | 0.26551958050400 | 0.91983190264100 | T | T | T |
| 0.29271740174900 | 0.26564261864400 | 0.14172151781500 | T | T | T |
| 0.29271740175100 | 0.26564261864000 | 0.47505485116300 | T | T | T |
| 0.29271740175800 | 0.26564261866300 | 0.80838818448400 | T | T | T |
| 0.62605449847300 | 0.26564308407900 | 0.14172366848400 | T | T | T |
| 0.62605449847300 | 0.26564308408000 | 0.47505700182400 | T | T | T |
| 0.62605449847100 | 0.26564308407700 | 0.80839033515800 | T | T | T |
| 0.95939004597300 | 0.26564110558900 | 0.14172097362400 | T | T | T |
| 0.95939004597400 | 0.26564110558500 | 0.47505430696100 | T | T | T |
| 0.95939004597300 | 0.26564110558600 | 0.80838764029500 | T | T | T |
| 0.04200276092420 | 0.99550740990200 | 0.03090378770470 | T | T | T |
| 0.04200276091990 | 0.99550740989900 | 0.36423712104000 | T | T | T |
| 0.04200276092560 | 0.99550740989800 | 0.69757045437200 | T | T | T |
| 0.37533171872800 | 0.99550820251800 | 0.03090169815710 | T | T | T |
| 0.37533171872700 | 0.99550820251800 | 0.36423503149500 | T | T | T |
| 0.37533171872600 | 0.99550820251200 | 0.69756836481100 | T | T | T |
| 0.70866518256000 | 0.99550627982800 | 0.03090473566950 | T | T | T |
| 0.70866518256400 | 0.99550627983100 | 0.36423806900300 | T | T | T |
| 0.70866518256100 | 0.99550627983000 | 0.69757140233400 | T | T | T |
| 0.04083720563430 | 0.99501886646500 | 0.25295419562700 | T | T | T |
| 0.04083720563580 | 0.99501886646600 | 0.58628752895900 | T | T | T |
| 0.04083720563040 | 0.99501886646300 | 0.91962086230100 | T | T | T |
| 0.37416770813000 | 0.99501702273500 | 0.25295171919800 | T | T | T |
| 0.37416770812800 | 0.99501702273500 | 0.58628505252500 | T | T | T |
| 0.37416770813200 | 0.99501702272100 | 0.91961838587000 | T | T | T |
| 0.70750028236300 | 0.99501682938100 | 0.25295471114700 | T | T | T |
| 0.70750028236200 | 0.99501682938000 | 0.58628804447600 | T | T | T |
| 0.70750028236100 | 0.99501682937800 | 0.91962137781000 | T | T | T |
| 0.04091291892390 | 0.99477207711700 | 0.14253217714600 | T | T | T |
| 0.04091291892720 | 0.99477207711800 | 0.47586551048500 | T | T | T |

|                  |                  |                  |   |   |   |
|------------------|------------------|------------------|---|---|---|
| 0.04091291892180 | 0.99477207711500 | 0.80919884381700 | T | T | T |
| 0.37424421619200 | 0.99477006073300 | 0.14253047736200 | T | T | T |
| 0.37424421618700 | 0.99477006073000 | 0.47586381070800 | T | T | T |
| 0.37424421619300 | 0.99477006071700 | 0.80919714403400 | T | T | T |
| 0.70757669999100 | 0.99477054484900 | 0.14253062138500 | T | T | T |
| 0.70757669999200 | 0.99477054485000 | 0.47586395471700 | T | T | T |
| 0.70757669999200 | 0.99477054485200 | 0.80919728805100 | T | T | T |
| 0.20837306295700 | 0.99541769097500 | 0.03109831658330 | T | T | T |
| 0.20837306296100 | 0.99541769098400 | 0.36443164992800 | T | T | T |
| 0.20837306295800 | 0.99541769097800 | 0.69776498324800 | T | T | T |
| 0.54171046153700 | 0.99541836377400 | 0.03109874583630 | T | T | T |
| 0.54171046154000 | 0.99541836376800 | 0.36443207917100 | T | T | T |
| 0.54171046153400 | 0.99541836377400 | 0.69776541249800 | T | T | T |
| 0.87504287222600 | 0.99541834102300 | 0.03109548822320 | T | T | T |
| 0.87504287222200 | 0.99541834102300 | 0.36442882155500 | T | T | T |
| 0.87504287222300 | 0.99541834102200 | 0.69776215488300 | T | T | T |
| 0.20709623597000 | 0.99728013865000 | 0.25041660092100 | T | T | T |
| 0.20709623596400 | 0.99728013865500 | 0.58374993424600 | T | T | T |
| 0.20709623596100 | 0.99728013865000 | 0.91708326759000 | T | T | T |
| 0.54043365741100 | 0.99727886551900 | 0.25041610654400 | T | T | T |
| 0.54043365741200 | 0.99727886551900 | 0.58374943987800 | T | T | T |
| 0.54043365741100 | 0.99727886552300 | 0.91708277321700 | T | T | T |
| 0.87376711215400 | 0.99728310471600 | 0.25041452726500 | T | T | T |
| 0.87376711215700 | 0.99728310470900 | 0.58374786059400 | T | T | T |
| 0.87376711215500 | 0.99728310471200 | 0.91708119393500 | T | T | T |
| 0.20746366677600 | 0.00356874323381 | 0.13690342999200 | T | T | T |
| 0.20746366677400 | 0.00356874323820 | 0.47023676333400 | T | T | T |
| 0.20746366677200 | 0.00356874322157 | 0.80357009665900 | T | T | T |
| 0.54079773987800 | 0.00357372113552 | 0.13690041739700 | T | T | T |
| 0.54079773987700 | 0.00357372113703 | 0.47023375073000 | T | T | T |

|                  |                  |                  |   |   |   |
|------------------|------------------|------------------|---|---|---|
| 0.54079773988100 | 0.00357372113244 | 0.80356708406500 | T | T | T |
| 0.87413430034500 | 0.00357135262217 | 0.13689972838800 | T | T | T |
| 0.87413430034700 | 0.00357135261699 | 0.47023306171900 | T | T | T |
| 0.87413430035100 | 0.00357135261031 | 0.80356639505600 | T | T | T |
| 0.00061413581719 | 0.06673077150670 | 0.08250071746050 | T | T | T |
| 0.00061413581570 | 0.06673077150790 | 0.41583405079400 | T | T | T |
| 0.00061413581398 | 0.06673077150650 | 0.74916738412700 | T | T | T |
| 0.33394762652800 | 0.06672977682230 | 0.08250142766200 | T | T | T |
| 0.33394762652300 | 0.06672977682310 | 0.41583476099500 | T | T | T |
| 0.33394762652600 | 0.06672977681530 | 0.74916809432800 | T | T | T |
| 0.66728120716800 | 0.06673082698800 | 0.08249909196540 | T | T | T |
| 0.66728120716900 | 0.06673082699200 | 0.41583242529700 | T | T | T |
| 0.66728120716600 | 0.06673082699180 | 0.74916575863000 | T | T | T |
| 0.33354383557800 | 0.06630006208460 | 0.30500790877300 | T | T | T |
| 0.33354383557500 | 0.06630006208190 | 0.63834124209800 | T | T | T |
| 0.33354383558400 | 0.06630006207720 | 0.97167457543800 | T | T | T |
| 0.66687694000900 | 0.06629942512040 | 0.30500833132700 | T | T | T |
| 0.66687694000500 | 0.06629942511400 | 0.63834166465800 | T | T | T |
| 0.66687694000900 | 0.06629942511690 | 0.97167499799000 | T | T | T |
| 0.00021225472963 | 0.06630103089550 | 0.30500863205500 | T | T | T |
| 0.00021225473325 | 0.06630103088860 | 0.63834196538700 | T | T | T |
| 0.00021225473087 | 0.06630103089290 | 0.97167529872600 | T | T | T |
| 0.99985100178000 | 0.06633016126490 | 0.19408061550300 | T | T | T |
| 0.99985100178400 | 0.06633016126770 | 0.52741394883100 | T | T | T |
| 0.99985100177400 | 0.06633016126660 | 0.86074728216700 | T | T | T |
| 0.33318359880100 | 0.06632955196120 | 0.19408130764300 | T | T | T |
| 0.33318359879800 | 0.06632955196760 | 0.52741464097400 | T | T | T |
| 0.33318359880300 | 0.06632955195030 | 0.86074797431100 | T | T | T |
| 0.66651541235200 | 0.06632813485690 | 0.19407937654600 | T | T | T |
| 0.66651541235000 | 0.06632813485290 | 0.52741270987900 | T | T | T |

|                  |                  |                  |   |   |   |
|------------------|------------------|------------------|---|---|---|
| 0.66651541235100 | 0.06632813485290 | 0.86074604321400 | T | T | T |
| 0.16719227670100 | 0.06304237587070 | 0.08585232085470 | T | T | T |
| 0.16719227670500 | 0.06304237587410 | 0.41918565419400 | T | T | T |
| 0.16719227669700 | 0.06304237586800 | 0.75251898752300 | T | T | T |
| 0.50052764134900 | 0.06304643335440 | 0.08585203035670 | T | T | T |
| 0.50052764135100 | 0.06304643335240 | 0.41918536369000 | T | T | T |
| 0.50052764134900 | 0.06304643335110 | 0.75251869701700 | T | T | T |
| 0.83385997682500 | 0.06304734495400 | 0.08585091921720 | T | T | T |
| 0.83385997681900 | 0.06304734495540 | 0.41918425254900 | T | T | T |
| 0.83385997682100 | 0.06304734495650 | 0.75251758588000 | T | T | T |
| 0.16646393509100 | 0.06542302338820 | 0.30550515896400 | T | T | T |
| 0.16646393509200 | 0.06542302338650 | 0.63883849229300 | T | T | T |
| 0.16646393508200 | 0.06542302338600 | 0.97217182562700 | T | T | T |
| 0.49979739874700 | 0.06542320229810 | 0.30550631492000 | T | T | T |
| 0.49979739874700 | 0.06542320229760 | 0.63883964824900 | T | T | T |
| 0.49979739874900 | 0.06542320230280 | 0.97217298158700 | T | T | T |
| 0.83313210561300 | 0.06542336305360 | 0.30550651782400 | T | T | T |
| 0.83313210561900 | 0.06542336304700 | 0.63883985115200 | T | T | T |
| 0.83313210562200 | 0.06542336304770 | 0.97217318449500 | T | T | T |
| 0.16619182441100 | 0.06892208761720 | 0.19264249474000 | T | T | T |
| 0.16619182441100 | 0.06892208762470 | 0.52597582806800 | T | T | T |
| 0.16619182440100 | 0.06892208761040 | 0.85930916140100 | T | T | T |
| 0.49952655974700 | 0.06892044485400 | 0.19264248222400 | T | T | T |
| 0.49952655974500 | 0.06892044485740 | 0.52597581555700 | T | T | T |
| 0.49952655975700 | 0.06892044485610 | 0.85930914888600 | T | T | T |
| 0.83285922844900 | 0.06891961584210 | 0.19264243603500 | T | T | T |
| 0.83285922845500 | 0.06891961583960 | 0.52597576936800 | T | T | T |
| 0.83285922845500 | 0.06891961583980 | 0.85930910270000 | T | T | T |
| 0.08416492962820 | 0.06510998676820 | 0.08392440158150 | T | T | T |
| 0.08416492962820 | 0.06510998676430 | 0.41725773491900 | T | T | T |

|                  |                  |                  |   |   |   |
|------------------|------------------|------------------|---|---|---|
| 0.08416492962940 | 0.06510998676170 | 0.75059106825100 | T | T | T |
| 0.41750018270300 | 0.06510829748960 | 0.08392704012150 | T | T | T |
| 0.41750018269400 | 0.06510829748210 | 0.41726037345800 | T | T | T |
| 0.41750018270300 | 0.06510829747760 | 0.75059370678900 | T | T | T |
| 0.75083233700800 | 0.06510943442610 | 0.08392594060550 | T | T | T |
| 0.75083233700700 | 0.06510943442920 | 0.41725927393900 | T | T | T |
| 0.75083233700300 | 0.06510943442740 | 0.75059260727300 | T | T | T |
| 0.08317231166180 | 0.06622797418690 | 0.30476233577500 | T | T | T |
| 0.08317231165730 | 0.06622797418430 | 0.63809566910600 | T | T | T |
| 0.08317231165220 | 0.06622797418970 | 0.97142900244000 | T | T | T |
| 0.41650557406800 | 0.06622740141610 | 0.30476282716300 | T | T | T |
| 0.41650557407200 | 0.06622740141100 | 0.63809616048900 | T | T | T |
| 0.41650557407700 | 0.06622740140800 | 0.97142949382900 | T | T | T |
| 0.74983884513500 | 0.06622646648800 | 0.30476344793000 | T | T | T |
| 0.74983884513900 | 0.06622646647870 | 0.63809678126100 | T | T | T |
| 0.74983884513500 | 0.06622646648040 | 0.97143011459800 | T | T | T |
| 0.08353493351860 | 0.06722190516240 | 0.19329831611500 | T | T | T |
| 0.08353493352000 | 0.06722190516250 | 0.52663164944700 | T | T | T |
| 0.08353493351250 | 0.06722190515680 | 0.85996498277900 | T | T | T |
| 0.41687004119500 | 0.06722002122690 | 0.19329831131300 | T | T | T |
| 0.41687004119400 | 0.06722002122990 | 0.52663164464700 | T | T | T |
| 0.41687004120400 | 0.06722002121820 | 0.85996497798200 | T | T | T |
| 0.75020133115400 | 0.06721978734670 | 0.19329825669300 | T | T | T |
| 0.75020133115200 | 0.06721978734400 | 0.52663159002600 | T | T | T |
| 0.75020133115200 | 0.06721978734600 | 0.85996492336100 | T | T | T |
| 0.24981283152900 | 0.06688784774020 | 0.08226248666510 | T | T | T |
| 0.24981283152700 | 0.06688784774880 | 0.41559581999600 | T | T | T |
| 0.24981283152500 | 0.06688784774100 | 0.74892915332900 | T | T | T |
| 0.58314615737900 | 0.06688699766140 | 0.08226433029120 | T | T | T |
| 0.58314615738000 | 0.06688699765850 | 0.41559766362600 | T | T | T |

|                  |                  |                  |   |   |   |
|------------------|------------------|------------------|---|---|---|
| 0.58314615737800 | 0.06688699765830 | 0.74893099695800 | T | T | T |
| 0.91648106348100 | 0.06688666147240 | 0.08226515111290 | T | T | T |
| 0.91648106348100 | 0.06688666147420 | 0.41559848444700 | T | T | T |
| 0.91648106348000 | 0.06688666146920 | 0.74893181778100 | T | T | T |
| 0.24994761457300 | 0.06608840374450 | 0.30490742358300 | T | T | T |
| 0.24994761457400 | 0.06608840373660 | 0.63824075691000 | T | T | T |
| 0.24994761457400 | 0.06608840373890 | 0.97157409024800 | T | T | T |
| 0.58328042063700 | 0.06608799915990 | 0.30490722324500 | T | T | T |
| 0.58328042063800 | 0.06608799915970 | 0.63824055657400 | T | T | T |
| 0.58328042064000 | 0.06608799915840 | 0.97157388991200 | T | T | T |
| 0.91661741825700 | 0.06608904666680 | 0.30490804036700 | T | T | T |
| 0.91661741825900 | 0.06608904666320 | 0.63824137369400 | T | T | T |
| 0.91661741825700 | 0.06608904666800 | 0.97157470703500 | T | T | T |
| 0.25000078182600 | 0.06702766068990 | 0.19343642048000 | T | T | T |
| 0.25000078182800 | 0.06702766069030 | 0.52676975381500 | T | T | T |
| 0.25000078182300 | 0.06702766067480 | 0.86010308714300 | T | T | T |
| 0.58333361523200 | 0.06702762596040 | 0.19343613088000 | T | T | T |
| 0.58333361523000 | 0.06702762596130 | 0.52676946421100 | T | T | T |
| 0.58333361523600 | 0.06702762596060 | 0.86010279754800 | T | T | T |
| 0.91666703294700 | 0.06702630504430 | 0.19343616770300 | T | T | T |
| 0.91666703294700 | 0.06702630504630 | 0.52676950103500 | T | T | T |
| 0.91666703294500 | 0.06702630504460 | 0.86010283436900 | T | T | T |
| 0.04166666667330 | 0.13043999673400 | 0.02777666599470 | F | F | F |
| 0.04166666667330 | 0.13043999673400 | 0.36110999932900 | F | F | F |
| 0.04166666667330 | 0.13043999673400 | 0.69444333266100 | F | F | F |
| 0.37500000000700 | 0.13043999673400 | 0.02777666599470 | F | F | F |
| 0.37500000000700 | 0.13043999673400 | 0.36110999932900 | F | F | F |
| 0.37500000000700 | 0.13043999673400 | 0.69444333266100 | F | F | F |
| 0.70833333334100 | 0.13043999673400 | 0.02777666599470 | F | F | F |
| 0.70833333334100 | 0.13043999673400 | 0.36110999932900 | F | F | F |

|                  |                  |                  |   |   |   |
|------------------|------------------|------------------|---|---|---|
| 0.70833333334100 | 0.13043999673400 | 0.69444333266100 | F | F | F |
| 0.04166666667330 | 0.13043999673400 | 0.24999999994900 | F | F | F |
| 0.04166666667330 | 0.13043999673400 | 0.58333333328300 | F | F | F |
| 0.04166666667330 | 0.13043999673400 | 0.91666666661700 | F | F | F |
| 0.3750000000700  | 0.13043999673400 | 0.24999999994900 | F | F | F |
| 0.3750000000700  | 0.13043999673400 | 0.58333333328300 | F | F | F |
| 0.3750000000700  | 0.13043999673400 | 0.91666666661700 | F | F | F |
| 0.70833333334100 | 0.13043999673400 | 0.24999999994900 | F | F | F |
| 0.70833333334100 | 0.13043999673400 | 0.58333333328300 | F | F | F |
| 0.70833333334100 | 0.13043999673400 | 0.91666666661700 | F | F | F |
| 0.04166666667330 | 0.13043999673400 | 0.13888999819000 | F | F | F |
| 0.04166666667330 | 0.13043999673400 | 0.47222333152400 | F | F | F |
| 0.04166666667330 | 0.13043999673400 | 0.80555666485600 | F | F | F |
| 0.3750000000700  | 0.13043999673400 | 0.13888999819000 | F | F | F |
| 0.3750000000700  | 0.13043999673400 | 0.47222333152400 | F | F | F |
| 0.3750000000700  | 0.13043999673400 | 0.80555666485600 | F | F | F |
| 0.70833333334100 | 0.13043999673400 | 0.13888999819000 | F | F | F |
| 0.70833333334100 | 0.13043999673400 | 0.47222333152400 | F | F | F |
| 0.70833333334100 | 0.13043999673400 | 0.80555666485600 | F | F | F |
| 0.2083333332800  | 0.13043999673400 | 0.02777666599470 | F | F | F |
| 0.2083333332800  | 0.13043999673400 | 0.36110999932900 | F | F | F |
| 0.2083333332800  | 0.13043999673400 | 0.69444333266100 | F | F | F |
| 0.5416666666100  | 0.13043999673400 | 0.02777666599470 | F | F | F |
| 0.5416666666100  | 0.13043999673400 | 0.36110999932900 | F | F | F |
| 0.5416666666100  | 0.13043999673400 | 0.69444333266100 | F | F | F |
| 0.8749999999500  | 0.13043999673400 | 0.02777666599470 | F | F | F |
| 0.8749999999500  | 0.13043999673400 | 0.36110999932900 | F | F | F |
| 0.8749999999500  | 0.13043999673400 | 0.69444333266100 | F | F | F |
| 0.2083333332800  | 0.13043999673400 | 0.24999999994900 | F | F | F |
| 0.2083333332800  | 0.13043999673400 | 0.58333333328300 | F | F | F |



|                  |                  |                  |   |   |   |
|------------------|------------------|------------------|---|---|---|
| 0.2083333332800  | 0.13043999673400 | 0.91666666661700 | F | F | F |
| 0.5416666666100  | 0.13043999673400 | 0.24999999994900 | F | F | F |
| 0.5416666666100  | 0.13043999673400 | 0.58333333328300 | F | F | F |
| 0.5416666666100  | 0.13043999673400 | 0.91666666661700 | F | F | F |
| 0.8749999999500  | 0.13043999673400 | 0.24999999994900 | F | F | F |
| 0.8749999999500  | 0.13043999673400 | 0.58333333328300 | F | F | F |
| 0.8749999999500  | 0.13043999673400 | 0.91666666661700 | F | F | F |
| 0.2083333332800  | 0.13043999673400 | 0.13888999819000 | F | F | F |
| 0.2083333332800  | 0.13043999673400 | 0.47222333152400 | F | F | F |
| 0.2083333332800  | 0.13043999673400 | 0.80555666485600 | F | F | F |
| 0.5416666666100  | 0.13043999673400 | 0.13888999819000 | F | F | F |
| 0.5416666666100  | 0.13043999673400 | 0.47222333152400 | F | F | F |
| 0.5416666666100  | 0.13043999673400 | 0.80555666485600 | F | F | F |
| 0.8749999999500  | 0.13043999673400 | 0.13888999819000 | F | F | F |
| 0.8749999999500  | 0.13043999673400 | 0.47222333152400 | F | F | F |
| 0.8749999999500  | 0.13043999673400 | 0.80555666485600 | F | F | F |
| 0.00062080624946 | 0.19413515923400 | 0.08249256521610 | T | T | T |
| 0.00062080624716 | 0.19413515923800 | 0.41582589854900 | T | T | T |
| 0.00062080624563 | 0.19413515923900 | 0.74915923188200 | T | T | T |
| 0.33395388796400 | 0.19413627433300 | 0.08249333302880 | T | T | T |
| 0.33395388796100 | 0.19413627433200 | 0.41582666636100 | T | T | T |
| 0.33395388796200 | 0.19413627433900 | 0.74915999969200 | T | T | T |
| 0.66728765412200 | 0.19413514458900 | 0.08249089084680 | T | T | T |
| 0.66728765412300 | 0.19413514459200 | 0.41582422418100 | T | T | T |
| 0.66728765411900 | 0.19413514459000 | 0.74915755751300 | T | T | T |
| 0.33353467847400 | 0.19453313060300 | 0.30502826221000 | T | T | T |
| 0.33353467847800 | 0.19453313060300 | 0.63836159553700 | T | T | T |
| 0.33353467847900 | 0.19453313060000 | 0.97169492887500 | T | T | T |
| 0.66686769896700 | 0.19453358039800 | 0.30502849608200 | T | T | T |
| 0.66686769896300 | 0.19453358040100 | 0.63836182941200 | T | T | T |

|                  |                  |                  |   |   |   |
|------------------|------------------|------------------|---|---|---|
| 0.66686769896000 | 0.19453358039900 | 0.97169516275200 | T | T | T |
| 0.00020301903969 | 0.19453222672400 | 0.30502938829700 | T | T | T |
| 0.00020301904093 | 0.19453222672600 | 0.63836272162800 | T | T | T |
| 0.00020301903650 | 0.19453222672000 | 0.97169605496700 | T | T | T |
| 0.99986162053800 | 0.19449647022400 | 0.19406622312000 | T | T | T |
| 0.99986162053700 | 0.19449647021900 | 0.52739955645400 | T | T | T |
| 0.99986162053300 | 0.19449647022100 | 0.86073288978600 | T | T | T |
| 0.33319402049000 | 0.19449697886500 | 0.19406697702600 | T | T | T |
| 0.33319402048400 | 0.19449697886600 | 0.52740031036000 | T | T | T |
| 0.33319402049600 | 0.19449697887400 | 0.86073364369700 | T | T | T |
| 0.66652585412700 | 0.19449776206600 | 0.19406459032900 | T | T | T |
| 0.66652585412500 | 0.19449776206100 | 0.52739792366100 | T | T | T |
| 0.66652585412400 | 0.19449776206000 | 0.86073125699500 | T | T | T |
| 0.16720368167000 | 0.19787248979200 | 0.08590879048660 | T | T | T |
| 0.16720368167600 | 0.19787248979400 | 0.41924212382200 | T | T | T |
| 0.16720368167200 | 0.19787248980500 | 0.75257545715300 | T | T | T |
| 0.50053888895600 | 0.19787036939100 | 0.08590802295060 | T | T | T |
| 0.50053888896500 | 0.19787036939200 | 0.41924135628900 | T | T | T |
| 0.50053888896000 | 0.19787036939400 | 0.75257468961800 | T | T | T |
| 0.83387154438900 | 0.19787148382700 | 0.08590718449650 | T | T | T |
| 0.83387154438500 | 0.19787148383000 | 0.41924051783100 | T | T | T |
| 0.83387154438700 | 0.19787148383000 | 0.75257385116500 | T | T | T |
| 0.16630952675100 | 0.19539666679900 | 0.30532975357000 | T | T | T |
| 0.16630952673600 | 0.19539666680000 | 0.63866308689400 | T | T | T |
| 0.16630952673400 | 0.19539666680300 | 0.97199642023400 | T | T | T |
| 0.49964244728500 | 0.19539771175100 | 0.30533008511400 | T | T | T |
| 0.49964244727700 | 0.19539771174700 | 0.63866341843500 | T | T | T |
| 0.49964244728500 | 0.19539771174200 | 0.97199675177600 | T | T | T |
| 0.83297735455500 | 0.19539783617800 | 0.30533072223300 | T | T | T |
| 0.83297735456100 | 0.19539783618300 | 0.63866405556500 | T | T | T |

|                  |                  |                  |   |   |   |
|------------------|------------------|------------------|---|---|---|
| 0.83297735455900 | 0.19539783617900 | 0.97199738889700 | T | T | T |
| 0.16622371841200 | 0.19261347618300 | 0.19261697376800 | T | T | T |
| 0.16622371841600 | 0.19261347617900 | 0.52595030710200 | T | T | T |
| 0.16622371841000 | 0.19261347617100 | 0.85928364042900 | T | T | T |
| 0.49956098301700 | 0.19260605763400 | 0.19261738503600 | T | T | T |
| 0.49956098301500 | 0.19260605763700 | 0.52595071836600 | T | T | T |
| 0.49956098302000 | 0.19260605764600 | 0.85928405170400 | T | T | T |
| 0.83289393468000 | 0.19260614530700 | 0.19261674845100 | T | T | T |
| 0.83289393468500 | 0.19260614530000 | 0.52595008178000 | T | T | T |
| 0.83289393468400 | 0.19260614530800 | 0.85928341511600 | T | T | T |
| 0.08417019118450 | 0.19572276832100 | 0.08391489803330 | T | T | T |
| 0.08417019117830 | 0.19572276833000 | 0.41724823137400 | T | T | T |
| 0.08417019117760 | 0.19572276833200 | 0.75058156470500 | T | T | T |
| 0.41750437880800 | 0.19572411989700 | 0.08391703801520 | T | T | T |
| 0.41750437880700 | 0.19572411990200 | 0.41725037134800 | T | T | T |
| 0.41750437880900 | 0.19572411990700 | 0.75058370467800 | T | T | T |
| 0.75083695294000 | 0.19572331853100 | 0.08391627555840 | T | T | T |
| 0.75083695293500 | 0.19572331852700 | 0.41724960888700 | T | T | T |
| 0.75083695293500 | 0.19572331853000 | 0.75058294222200 | T | T | T |
| 0.08333270411170 | 0.19460114206700 | 0.30462000604900 | T | T | T |
| 0.08333270411110 | 0.19460114206500 | 0.63795333936900 | T | T | T |
| 0.08333270410450 | 0.19460114206300 | 0.97128667271000 | T | T | T |
| 0.41666677321900 | 0.19460141214500 | 0.30461942215600 | T | T | T |
| 0.41666677322500 | 0.19460141214400 | 0.63795275547800 | T | T | T |
| 0.41666677323200 | 0.19460141214300 | 0.97128608882500 | T | T | T |
| 0.74999964659100 | 0.19460255607600 | 0.30462027216100 | T | T | T |
| 0.74999964659200 | 0.19460255608400 | 0.63795360549200 | T | T | T |
| 0.74999964660200 | 0.19460255608500 | 0.97128693882500 | T | T | T |
| 0.08358392689230 | 0.19372496816400 | 0.19328030316000 | T | T | T |
| 0.08358392689180 | 0.19372496815600 | 0.52661363649400 | T | T | T |

|                  |                  |                  |   |   |   |
|------------------|------------------|------------------|---|---|---|
| 0.08358392688080 | 0.19372496815600 | 0.85994696982600 | T | T | T |
| 0.41691651785000 | 0.19372083417200 | 0.19328216257600 | T | T | T |
| 0.41691651784600 | 0.19372083417600 | 0.52661549591000 | T | T | T |
| 0.41691651785400 | 0.19372083418300 | 0.85994882923900 | T | T | T |
| 0.75024889352300 | 0.19372243667800 | 0.19328158752900 | T | T | T |
| 0.75024889352000 | 0.19372243667900 | 0.52661492086100 | T | T | T |
| 0.75024889352400 | 0.19372243668500 | 0.85994825419600 | T | T | T |
| 0.24979332457700 | 0.19398194483900 | 0.08227146969130 | T | T | T |
| 0.24979332457700 | 0.19398194483700 | 0.41560480302200 | T | T | T |
| 0.24979332457900 | 0.19398194484800 | 0.74893813635900 | T | T | T |
| 0.58312635018800 | 0.19398358883300 | 0.08227337498340 | T | T | T |
| 0.58312635019500 | 0.19398358883800 | 0.41560670831700 | T | T | T |
| 0.58312635019000 | 0.19398358883800 | 0.74894004165100 | T | T | T |
| 0.91646163949100 | 0.19398174624500 | 0.08227391875530 | T | T | T |
| 0.91646163949000 | 0.19398174624800 | 0.41560725209100 | T | T | T |
| 0.91646163949000 | 0.19398174624800 | 0.74894058542200 | T | T | T |
| 0.24994058198400 | 0.19474467665900 | 0.30488887144700 | T | T | T |
| 0.24994058198600 | 0.19474467666300 | 0.63822220478100 | T | T | T |
| 0.24994058198700 | 0.19474467666100 | 0.97155553810900 | T | T | T |
| 0.58327310727500 | 0.19474535696000 | 0.30488856607100 | T | T | T |
| 0.58327310727500 | 0.19474535696200 | 0.63822189940400 | T | T | T |
| 0.58327310727500 | 0.19474535696000 | 0.97155523274200 | T | T | T |
| 0.91660983761000 | 0.19474403901300 | 0.30488938275800 | T | T | T |
| 0.91660983761500 | 0.19474403901400 | 0.63822271608200 | T | T | T |
| 0.91660983761500 | 0.19474403901500 | 0.97155604942200 | T | T | T |
| 0.24994934408000 | 0.19404656331200 | 0.19342561453600 | T | T | T |
| 0.24994934407900 | 0.19404656329600 | 0.52675894786600 | T | T | T |
| 0.24994934407400 | 0.19404656331200 | 0.86009228119700 | T | T | T |
| 0.58328225720100 | 0.19404715163200 | 0.19342531793100 | T | T | T |
| 0.58328225720000 | 0.19404715162600 | 0.52675865126200 | T | T | T |

|                  |                  |                  |   |   |   |
|------------------|------------------|------------------|---|---|---|
| 0.58328225720000 | 0.19404715163700 | 0.86009198460400 | T | T | T |
| 0.91661584702500 | 0.19404529394500 | 0.19342494453700 | T | T | T |
| 0.91661584702600 | 0.19404529393800 | 0.52675827786900 | T | T | T |
| 0.91661584702800 | 0.19404529394300 | 0.86009161120800 | T | T | T |
| 0.04204366734380 | 0.26525372356700 | 0.03087991645660 | T | T | T |
| 0.04204366734330 | 0.26525372357800 | 0.36421324979300 | T | T | T |
| 0.04204366734350 | 0.26525372357200 | 0.69754658311500 | T | T | T |
| 0.37537289302400 | 0.26525365912300 | 0.03087702564730 | T | T | T |
| 0.37537289302000 | 0.26525365912000 | 0.36421035898800 | T | T | T |
| 0.37537289302400 | 0.26525365912700 | 0.69754369230300 | T | T | T |
| 0.70870603917500 | 0.26525405388200 | 0.03088054032550 | T | T | T |
| 0.70870603917800 | 0.26525405388500 | 0.36421387366200 | T | T | T |
| 0.70870603917200 | 0.26525405388700 | 0.69754720699500 | T | T | T |
| 0.04083987608270 | 0.26571724575400 | 0.25298536978700 | T | T | T |
| 0.04083987608070 | 0.26571724574900 | 0.58631870311500 | T | T | T |
| 0.04083987607600 | 0.26571724574500 | 0.91965203645500 | T | T | T |
| 0.37417108776100 | 0.26571977427200 | 0.25298143236400 | T | T | T |
| 0.37417108775900 | 0.26571977426700 | 0.58631476570000 | T | T | T |
| 0.37417108776800 | 0.26571977426600 | 0.91964809904800 | T | T | T |
| 0.70750319952100 | 0.26571857669300 | 0.25298463991500 | T | T | T |
| 0.70750319951900 | 0.26571857669900 | 0.58631797324400 | T | T | T |
| 0.70750319951900 | 0.26571857669500 | 0.91965130658100 | T | T | T |
| 0.04091869801330 | 0.26602016177600 | 0.14253864950100 | T | T | T |
| 0.04091869801280 | 0.26602016176700 | 0.47587198284900 | T | T | T |
| 0.04091869800780 | 0.26602016177600 | 0.80920531617600 | T | T | T |
| 0.37425058249600 | 0.26602257952600 | 0.14253725959000 | T | T | T |
| 0.37425058249200 | 0.26602257952300 | 0.47587059292500 | T | T | T |
| 0.37425058249800 | 0.26602257953300 | 0.80920392625200 | T | T | T |
| 0.70758272656500 | 0.26602073871500 | 0.14253756382600 | T | T | T |
| 0.70758272656500 | 0.26602073871600 | 0.47587089715700 | T | T | T |

|                  |                  |                  |   |   |   |
|------------------|------------------|------------------|---|---|---|
| 0.70758272656300 | 0.26602073870900 | 0.80920423049400 | T | T | T |
| 0.20832948686000 | 0.26532928730200 | 0.03106840603620 | T | T | T |
| 0.20832948685900 | 0.26532928729500 | 0.36440173937900 | T | T | T |
| 0.20832948685500 | 0.26532928730500 | 0.69773507269400 | T | T | T |
| 0.54166759188400 | 0.26532931170500 | 0.03106901747860 | T | T | T |
| 0.54166759189300 | 0.26532931171700 | 0.36440235082000 | T | T | T |
| 0.54166759188500 | 0.26532931171000 | 0.69773568414600 | T | T | T |
| 0.87499950436300 | 0.26532909042900 | 0.03106510286640 | T | T | T |
| 0.87499950435900 | 0.26532909043000 | 0.36439843620200 | T | T | T |
| 0.87499950436400 | 0.26532909043000 | 0.69773176953000 | T | T | T |
| 0.20717353735100 | 0.26422581300500 | 0.25051408385400 | T | T | T |
| 0.20717353735200 | 0.26422581301100 | 0.58384741718400 | T | T | T |
| 0.20717353734200 | 0.26422581301300 | 0.91718075051800 | T | T | T |
| 0.54050908825600 | 0.26422595629700 | 0.25051063102100 | T | T | T |
| 0.54050908825900 | 0.26422595629400 | 0.58384396434700 | T | T | T |
| 0.54050908826000 | 0.26422595629700 | 0.91717729769700 | T | T | T |
| 0.87384297991900 | 0.26422059013100 | 0.25050847058400 | T | T | T |
| 0.87384297992000 | 0.26422059012700 | 0.58384180391000 | T | T | T |
| 0.87384297992100 | 0.26422059012900 | 0.91717513725100 | T | T | T |
| 0.20752444623700 | 0.25833007217800 | 0.13658218933700 | T | T | T |
| 0.20752444623900 | 0.25833007216200 | 0.46991552267200 | T | T | T |
| 0.20752444623900 | 0.25833007218300 | 0.80324885599800 | T | T | T |
| 0.54085869911800 | 0.25832390484200 | 0.13657929622200 | T | T | T |
| 0.54085869911900 | 0.25832390483800 | 0.46991262955700 | T | T | T |
| 0.54085869912100 | 0.25832390484500 | 0.80324596289500 | T | T | T |
| 0.87419522575500 | 0.25832599979700 | 0.13657945990900 | T | T | T |
| 0.87419522575500 | 0.25832599979700 | 0.46991279324400 | T | T | T |
| 0.87419522576200 | 0.25832599980500 | 0.80324612658200 | T | T | T |
| 0.19105676444900 | 0.37683495311900 | 0.22586005552800 | T | T | T |
| 0.19105676445000 | 0.37683495312500 | 0.55919338886000 | T | T | T |

|                  |                  |                  |   |   |   |
|------------------|------------------|------------------|---|---|---|
| 0.19105676445700 | 0.37683495311500 | 0.89252672219200 | T | T | T |
| 0.52438259510100 | 0.37683365525200 | 0.22585962925000 | T | T | T |
| 0.52438259510500 | 0.37683365526400 | 0.55919296258500 | T | T | T |
| 0.52438259510500 | 0.37683365525700 | 0.89252629592200 | T | T | T |
| 0.85772305735200 | 0.37682754553600 | 0.22585984957300 | T | T | T |
| 0.85772305735300 | 0.37682754553600 | 0.55919318290200 | T | T | T |
| 0.85772305735500 | 0.37682754553200 | 0.89252651623900 | T | T | T |
| 0.21700108223800 | 0.29079634158500 | 0.15578497825700 | T | T | T |
| 0.21700108223000 | 0.29079634157800 | 0.48911831159400 | T | T | T |
| 0.21700108223200 | 0.29079634157700 | 0.82245164493100 | T | T | T |
| 0.55032484711600 | 0.29079609985800 | 0.15578325018300 | T | T | T |
| 0.55032484711900 | 0.29079609986000 | 0.48911658351500 | T | T | T |
| 0.55032484712400 | 0.29079609986600 | 0.82244991685300 | T | T | T |
| 0.88365908957800 | 0.29079719339500 | 0.15578439348900 | T | T | T |
| 0.88365908957800 | 0.29079719339800 | 0.48911772682000 | T | T | T |
| 0.88365908958400 | 0.29079719340800 | 0.82245106015900 | T | T | T |
| 0.22407398319500 | 0.33619552692700 | 0.23887737428500 | T | T | T |
| 0.22407398319000 | 0.33619552693700 | 0.57221070763800 | T | T | T |
| 0.22407398319300 | 0.33619552693000 | 0.90554404096400 | T | T | T |
| 0.55740328408200 | 0.33619593926700 | 0.23887808607100 | T | T | T |
| 0.55740328408700 | 0.33619593926800 | 0.57221141940100 | T | T | T |
| 0.55740328408500 | 0.33619593926100 | 0.90554475274100 | T | T | T |
| 0.89073950969000 | 0.33618984681300 | 0.23887860960000 | T | T | T |
| 0.89073950969300 | 0.33618984682100 | 0.57221194293200 | T | T | T |
| 0.89073950969200 | 0.33618984681600 | 0.90554527626900 | T | T | T |
| 0.16373187187600 | 0.36205079191900 | 0.24690296044500 | T | T | T |
| 0.16373187187900 | 0.36205079192000 | 0.58023629377200 | T | T | T |
| 0.16373187188100 | 0.36205079191500 | 0.91356962710400 | T | T | T |
| 0.49705977122900 | 0.36204596226500 | 0.24690409415800 | T | T | T |
| 0.49705977123600 | 0.36204596226600 | 0.58023742749200 | T | T | T |

|                  |                  |                  |   |   |   |
|------------------|------------------|------------------|---|---|---|
| 0.49705977123500 | 0.36204596226000 | 0.91357076083100 | T | T | T |
| 0.83039808919000 | 0.36204358499900 | 0.24690405140900 | T | T | T |
| 0.83039808919000 | 0.36204358500000 | 0.58023738473900 | T | T | T |
| 0.83039808919300 | 0.36204358499600 | 0.91357071807800 | T | T | T |
| 0.16305338152400 | 0.35505888623900 | 0.21196287017800 | T | T | T |
| 0.16305338153600 | 0.35505888623200 | 0.54529620350600 | T | T | T |
| 0.16305338153700 | 0.35505888623200 | 0.87862953683700 | T | T | T |
| 0.49637915641400 | 0.35505622825000 | 0.21196262431200 | T | T | T |
| 0.49637915642500 | 0.35505622826100 | 0.54529595764700 | T | T | T |
| 0.49637915642300 | 0.35505622825600 | 0.87862929098400 | T | T | T |
| 0.82971797924800 | 0.35505375238200 | 0.21196278429400 | T | T | T |
| 0.82971797924600 | 0.35505375237800 | 0.54529611762500 | T | T | T |
| 0.82971797924700 | 0.35505375237500 | 0.87862945096100 | T | T | T |
| 0.17756869290600 | 0.32342308147000 | 0.27185146135600 | T | T | T |
| 0.17756869291400 | 0.32342308147200 | 0.60518479468000 | T | T | T |
| 0.17756869291300 | 0.32342308146900 | 0.93851812801000 | T | T | T |
| 0.51089825072200 | 0.32341886485800 | 0.27185019533400 | T | T | T |
| 0.51089825072800 | 0.32341886484500 | 0.60518352865900 | T | T | T |
| 0.51089825072600 | 0.32341886484000 | 0.93851686199800 | T | T | T |
| 0.84423704858400 | 0.32341763718900 | 0.27185037415000 | T | T | T |
| 0.84423704858400 | 0.32341763719700 | 0.60518370748200 | T | T | T |
| 0.84423704858800 | 0.32341763718800 | 0.93851704081900 | T | T | T |
| 0.14425028651300 | 0.32110899952900 | 0.26788044025700 | T | T | T |
| 0.14425028651900 | 0.32110899953800 | 0.60121377359600 | T | T | T |
| 0.14425028651900 | 0.32110899952600 | 0.93454710692100 | T | T | T |
| 0.47757918790000 | 0.32110624862100 | 0.26787949311200 | T | T | T |
| 0.47757918790500 | 0.32110624862300 | 0.60121282644000 | T | T | T |
| 0.47757918790200 | 0.32110624861600 | 0.93454615978000 | T | T | T |
| 0.81091718008000 | 0.32110326051000 | 0.26788055348900 | T | T | T |
| 0.81091718008000 | 0.32110326051500 | 0.60121388682000 | T | T | T |



|                  |                  |                  |   |   |   |
|------------------|------------------|------------------|---|---|---|
| 0.81091718008300 | 0.32110326051700 | 0.93454722016200 | T | T | T |
| 0.23783090634900 | 0.38366413336700 | 0.23616715304400 | T | T | T |
| 0.23783090635900 | 0.38366413336600 | 0.56950048640000 | T | T | T |
| 0.23783090636600 | 0.38366413335600 | 0.90283381973000 | T | T | T |
| 0.57115969601700 | 0.38366505809200 | 0.23616660632400 | T | T | T |
| 0.57115969602900 | 0.38366505809300 | 0.56949993966600 | T | T | T |
| 0.57115969602500 | 0.38366505808600 | 0.90283327300100 | T | T | T |
| 0.90449769887700 | 0.38365807003900 | 0.23616705144700 | T | T | T |
| 0.90449769887700 | 0.38365807004800 | 0.56950038478000 | T | T | T |
| 0.90449769887700 | 0.38365807004100 | 0.90283371811600 | T | T | T |
| 0.14394039130800 | 0.29967722166500 | 0.17910393333700 | T | T | T |
| 0.14394039131900 | 0.29967722165700 | 0.51243726667000 | T | T | T |
| 0.14394039131900 | 0.29967722164300 | 0.84577059999700 | T | T | T |
| 0.47726714723400 | 0.29965990181400 | 0.17910196918100 | T | T | T |
| 0.47726714723600 | 0.29965990182900 | 0.51243530251500 | T | T | T |
| 0.47726714723600 | 0.29965990183000 | 0.84576863585400 | T | T | T |
| 0.81060894913700 | 0.29966181196200 | 0.17909893041900 | T | T | T |
| 0.81060894913300 | 0.29966181194700 | 0.51243226374900 | T | T | T |
| 0.81060894913700 | 0.29966181196100 | 0.84576559708800 | T | T | T |
| 0.17709089714900 | 0.30562252916400 | 0.18021364337300 | T | T | T |
| 0.17709089716200 | 0.30562252916400 | 0.51354697669900 | T | T | T |
| 0.17709089716200 | 0.30562252916000 | 0.84688031003500 | T | T | T |
| 0.51041673392500 | 0.30562056001600 | 0.18021358512300 | T | T | T |
| 0.51041673392800 | 0.30562056001400 | 0.51354691845900 | T | T | T |
| 0.51041673392800 | 0.30562056001400 | 0.84688025179400 | T | T | T |
| 0.84375936934900 | 0.30561838268500 | 0.18021382073800 | T | T | T |
| 0.84375936934400 | 0.30561838268100 | 0.51354715407300 | T | T | T |
| 0.84375936934700 | 0.30561838268500 | 0.84688048740500 | T | T | T |
| 0.19124975585500 | 0.88715503254300 | 0.22561997915000 | T | T | T |
| 0.19124975585100 | 0.88715503255700 | 0.55895331248000 | T | T | T |

|                  |                  |                  |   |   |   |
|------------------|------------------|------------------|---|---|---|
| 0.19124975585800 | 0.88715503256000 | 0.89228664581500 | T | T | T |
| 0.52457563615300 | 0.88715548596500 | 0.22561977762800 | T | T | T |
| 0.52457563615000 | 0.88715548596000 | 0.55895311096000 | T | T | T |
| 0.52457563615300 | 0.88715548597000 | 0.89228644429100 | T | T | T |
| 0.85791592164300 | 0.88716279308300 | 0.22562008804600 | T | T | T |
| 0.85791592164600 | 0.88716279308700 | 0.55895342137800 | T | T | T |
| 0.85791592165600 | 0.88716279309200 | 0.89228675471300 | T | T | T |
| 0.21701023629900 | 0.97155751832800 | 0.15635690543900 | T | T | T |
| 0.21701023629800 | 0.97155751830600 | 0.48969023876300 | T | T | T |
| 0.21701023629800 | 0.97155751834300 | 0.82302357211700 | T | T | T |
| 0.55033441225600 | 0.97155797016000 | 0.15635579345200 | T | T | T |
| 0.55033441225300 | 0.97155797016900 | 0.48968912678800 | T | T | T |
| 0.55033441225300 | 0.97155797015900 | 0.82302246012500 | T | T | T |
| 0.88366909946600 | 0.97156826848200 | 0.15636280537500 | T | T | T |
| 0.88366909946400 | 0.97156826847100 | 0.48969613870600 | T | T | T |
| 0.88366909946700 | 0.97156826846700 | 0.82302947204600 | T | T | T |
| 0.22409264920100 | 0.92739539046100 | 0.23890665990700 | T | T | T |
| 0.22409264920100 | 0.92739539047500 | 0.57223999323900 | T | T | T |
| 0.22409264920400 | 0.92739539048000 | 0.90557332657300 | T | T | T |
| 0.55742130762700 | 0.92739576467000 | 0.23890754509700 | T | T | T |
| 0.55742130762200 | 0.92739576466600 | 0.57224087842800 | T | T | T |
| 0.55742130762400 | 0.92739576467500 | 0.90557421176500 | T | T | T |
| 0.89075729121400 | 0.92740366985200 | 0.23890851108100 | T | T | T |
| 0.89075729121400 | 0.92740366985500 | 0.57224184441400 | T | T | T |
| 0.89075729122100 | 0.92740366985900 | 0.90557517775300 | T | T | T |
| 0.16395100879300 | 0.90193039948400 | 0.24707234973600 | T | T | T |
| 0.16395100879300 | 0.90193039948900 | 0.58040568306400 | T | T | T |
| 0.16395100879500 | 0.90193039949500 | 0.91373901640000 | T | T | T |
| 0.49727967227000 | 0.90193654600400 | 0.24707374902600 | T | T | T |
| 0.49727967226700 | 0.90193654599900 | 0.58040708235500 | T | T | T |

|                  |                  |                  |   |   |   |
|------------------|------------------|------------------|---|---|---|
| 0.49727967227000 | 0.90193654599800 | 0.91374041568600 | T | T | T |
| 0.83061719530500 | 0.90194002968300 | 0.24707369369000 | T | T | T |
| 0.83061719530600 | 0.90194002968300 | 0.58040702702200 | T | T | T |
| 0.83061719531200 | 0.90194002968400 | 0.91374036035600 | T | T | T |
| 0.16329767589400 | 0.90904069843900 | 0.21182103642300 | T | T | T |
| 0.16329767588900 | 0.90904069845400 | 0.54515436975800 | T | T | T |
| 0.16329767589600 | 0.90904069844700 | 0.87848770308800 | T | T | T |
| 0.49662443061800 | 0.90904263547600 | 0.21182077565500 | T | T | T |
| 0.49662443061600 | 0.90904263547300 | 0.54515410898400 | T | T | T |
| 0.49662443061500 | 0.90904263547800 | 0.87848744231700 | T | T | T |
| 0.82996284944400 | 0.90904539408300 | 0.21182081524500 | T | T | T |
| 0.82996284944500 | 0.90904539408200 | 0.54515414857600 | T | T | T |
| 0.82996284945200 | 0.90904539408300 | 0.87848748191100 | T | T | T |
| 0.17776441792900 | 0.93988678008800 | 0.27184820368900 | T | T | T |
| 0.17776441793200 | 0.93988678009600 | 0.60518153702500 | T | T | T |
| 0.17776441792800 | 0.93988678010200 | 0.93851487035500 | T | T | T |
| 0.51109536508100 | 0.93989481614700 | 0.27184601027600 | T | T | T |
| 0.51109536507700 | 0.93989481614200 | 0.60517934360700 | T | T | T |
| 0.51109536507800 | 0.93989481614400 | 0.93851267693900 | T | T | T |
| 0.84443364654600 | 0.93989697004900 | 0.27184612005800 | T | T | T |
| 0.84443364654800 | 0.93989697005000 | 0.60517945339100 | T | T | T |
| 0.84443364655000 | 0.93989697005300 | 0.93851278672800 | T | T | T |
| 0.14435076021100 | 0.94195304405900 | 0.26794732236200 | T | T | T |
| 0.14435076021600 | 0.94195304406700 | 0.60128065570200 | T | T | T |
| 0.14435076021000 | 0.94195304407400 | 0.93461398902300 | T | T | T |
| 0.47768043806700 | 0.94195852089900 | 0.26794619775200 | T | T | T |
| 0.47768043806300 | 0.94195852088800 | 0.60127953108600 | T | T | T |
| 0.47768043806500 | 0.94195852088700 | 0.93461286441900 | T | T | T |
| 0.81101759626400 | 0.94196398159000 | 0.26794650114300 | T | T | T |
| 0.81101759626500 | 0.94196398158600 | 0.60127983447400 | T | T | T |

|                  |                  |                  |   |   |   |
|------------------|------------------|------------------|---|---|---|
| 0.81101759626500 | 0.94196398158600 | 0.93461316781200 | T | T | T |
| 0.23820660909600 | 0.88022396539600 | 0.23592694794700 | T | T | T |
| 0.23820660909200 | 0.88022396540800 | 0.56926028127100 | T | T | T |
| 0.23820660909900 | 0.88022396541400 | 0.90259361461100 | T | T | T |
| 0.57153424834400 | 0.88022442845100 | 0.23592546585300 | T | T | T |
| 0.57153424834200 | 0.88022442844700 | 0.56925879918600 | T | T | T |
| 0.57153424834100 | 0.88022442845800 | 0.90259213251700 | T | T | T |
| 0.90487218167100 | 0.88023345270300 | 0.23592575006300 | T | T | T |
| 0.90487218167100 | 0.88023345270500 | 0.56925908339500 | T | T | T |
| 0.90487218167400 | 0.88023345270900 | 0.90259241673300 | T | T | T |
| 0.14405512323900 | 0.96418191638700 | 0.17864376504900 | T | T | T |
| 0.14405512323600 | 0.96418191639000 | 0.51197709838300 | T | T | T |
| 0.14405512324300 | 0.96418191639000 | 0.84531043171200 | T | T | T |
| 0.47738272419700 | 0.96418317583300 | 0.17864440523800 | T | T | T |
| 0.47738272419400 | 0.96418317583400 | 0.51197773856500 | T | T | T |
| 0.47738272419300 | 0.96418317582800 | 0.84531107190500 | T | T | T |
| 0.81072429082700 | 0.96418441698800 | 0.17864179633800 | T | T | T |
| 0.81072429082600 | 0.96418441698800 | 0.51197512966800 | T | T | T |
| 0.81072429082500 | 0.96418441698000 | 0.84530846300900 | T | T | T |
| 0.17737063286700 | 0.95935127635300 | 0.18007728867900 | T | T | T |
| 0.17737063286200 | 0.95935127635000 | 0.51341062201700 | T | T | T |
| 0.17737063287000 | 0.95935127635400 | 0.84674395534100 | T | T | T |
| 0.51069801801200 | 0.95935372044800 | 0.18007753880500 | T | T | T |
| 0.51069801800900 | 0.95935372044600 | 0.51341087213200 | T | T | T |
| 0.51069801800800 | 0.95935372044300 | 0.84674420547100 | T | T | T |
| 0.84404025792300 | 0.95935760021400 | 0.18007846814000 | T | T | T |
| 0.84404025792100 | 0.95935760021500 | 0.51341180147400 | T | T | T |
| 0.84404025791900 | 0.95935760021400 | 0.84674513480900 | T | T | T |
| 0.22342080733200 | 0.36414234997300 | 0.22837227226700 | T | T | T |
| 0.22342080733400 | 0.36414234997200 | 0.56170560561500 | T | T | T |

|                  |                  |                  |   |   |   |
|------------------|------------------|------------------|---|---|---|
| 0.22342080733600 | 0.36414234995800 | 0.89503893894700 | T | T | T |
| 0.55674903107200 | 0.36414427653600 | 0.22837329064400 | T | T | T |
| 0.55674903107900 | 0.36414427654900 | 0.56170662398000 | T | T | T |
| 0.55674903107900 | 0.36414427653800 | 0.89503995731500 | T | T | T |
| 0.89008807397100 | 0.36413730633300 | 0.22837224845600 | T | T | T |
| 0.89008807397200 | 0.36413730633900 | 0.56170558178800 | T | T | T |
| 0.89008807397300 | 0.36413730632900 | 0.89503891512400 | T | T | T |
| 0.16905697043500 | 0.37695746765100 | 0.22609698708400 | T | T | T |
| 0.16905697043800 | 0.37695746764900 | 0.55943032041300 | T | T | T |
| 0.16905697044600 | 0.37695746765000 | 0.89276365374400 | T | T | T |
| 0.50238378903200 | 0.37695420784700 | 0.22609679487400 | T | T | T |
| 0.50238378904000 | 0.37695420785400 | 0.55943012820600 | T | T | T |
| 0.50238378903800 | 0.37695420785000 | 0.89276346154600 | T | T | T |
| 0.83572333383200 | 0.37695144715800 | 0.22609750715100 | T | T | T |
| 0.83572333383100 | 0.37695144715500 | 0.55943084048000 | T | T | T |
| 0.83572333383100 | 0.37695144715500 | 0.89276417382000 | T | T | T |
| 0.16059312676900 | 0.34307820168100 | 0.27020200732200 | T | T | T |
| 0.16059312677700 | 0.34307820168700 | 0.60353534065100 | T | T | T |
| 0.16059312677400 | 0.34307820168300 | 0.93686867398200 | T | T | T |
| 0.49392296499400 | 0.34307557936600 | 0.27020206561400 | T | T | T |
| 0.49392296500100 | 0.34307557936000 | 0.60353539894400 | T | T | T |
| 0.49392296500000 | 0.34307557935400 | 0.93686873228100 | T | T | T |
| 0.82726085084600 | 0.34307382564900 | 0.27020239473700 | T | T | T |
| 0.82726085084300 | 0.34307382565300 | 0.60353572807000 | T | T | T |
| 0.82726085084800 | 0.34307382565100 | 0.93686906140700 | T | T | T |
| 0.16028053048600 | 0.30758074421000 | 0.19209927277700 | T | T | T |
| 0.16028053050100 | 0.30758074421600 | 0.52543260610700 | T | T | T |
| 0.16028053049700 | 0.30758074420500 | 0.85876593943700 | T | T | T |
| 0.49360595217000 | 0.30757232702100 | 0.19209912686300 | T | T | T |
| 0.49360595217700 | 0.30757232702200 | 0.52543246019700 | T | T | T |

|                  |                  |                  |   |   |   |
|------------------|------------------|------------------|---|---|---|
| 0.49360595217700 | 0.30757232702400 | 0.85876579353600 | T | T | T |
| 0.82694709101200 | 0.30757233363200 | 0.19209663953100 | T | T | T |
| 0.82694709100700 | 0.30757233362600 | 0.52542997286300 | T | T | T |
| 0.82694709101200 | 0.30757233363300 | 0.85876330619800 | T | T | T |
| 0.22377151736100 | 0.89967757951900 | 0.22811608464400 | T | T | T |
| 0.22377151736000 | 0.89967757952200 | 0.56144941797500 | T | T | T |
| 0.22377151736400 | 0.89967757953600 | 0.89478275131000 | T | T | T |
| 0.55709932707700 | 0.89967536057500 | 0.22811685223100 | T | T | T |
| 0.55709932707100 | 0.89967536057100 | 0.56145018556300 | T | T | T |
| 0.55709932707400 | 0.89967536057200 | 0.89478351889800 | T | T | T |
| 0.89043898032500 | 0.89968364309700 | 0.22811599796800 | T | T | T |
| 0.89043898032600 | 0.89968364310300 | 0.56144933129800 | T | T | T |
| 0.89043898033800 | 0.89968364310500 | 0.89478266463300 | T | T | T |
| 0.16928097731800 | 0.88719178990100 | 0.22594965838600 | T | T | T |
| 0.16928097731700 | 0.88719178991000 | 0.55928299171700 | T | T | T |
| 0.16928097732400 | 0.88719178991000 | 0.89261632505000 | T | T | T |
| 0.50260773100300 | 0.88719451694500 | 0.22594983088400 | T | T | T |
| 0.50260773100000 | 0.88719451694200 | 0.55928316421500 | T | T | T |
| 0.50260773100300 | 0.88719451694600 | 0.89261649754500 | T | T | T |
| 0.83594692969000 | 0.88719774265900 | 0.22595054425600 | T | T | T |
| 0.83594692969300 | 0.88719774266200 | 0.55928387758700 | T | T | T |
| 0.83594692969900 | 0.88719774266300 | 0.89261721092300 | T | T | T |
| 0.16083588474500 | 0.92004298920800 | 0.27026499213000 | T | T | T |
| 0.16083588474900 | 0.92004298921400 | 0.60359832546400 | T | T | T |
| 0.16083588474500 | 0.92004298921800 | 0.93693165879200 | T | T | T |
| 0.49416712701000 | 0.92004940914600 | 0.27026461946100 | T | T | T |
| 0.49416712700900 | 0.92004940913700 | 0.60359795279400 | T | T | T |
| 0.49416712701000 | 0.92004940913700 | 0.93693128612700 | T | T | T |
| 0.82750367134800 | 0.92005263707300 | 0.27026443606700 | T | T | T |
| 0.82750367135000 | 0.92005263707600 | 0.60359776940100 | T | T | T |

|                  |                  |                  |   |   |   |
|------------------|------------------|------------------|---|---|---|
| 0.82750367135200 | 0.92005263707300 | 0.93693110273500 | T | T | T |
| 0.16048149514800 | 0.95646075248300 | 0.19181740109700 | T | T | T |
| 0.16048149514200 | 0.95646075248400 | 0.52515073443100 | T | T | T |
| 0.16048149515100 | 0.95646075248600 | 0.85848406775900 | T | T | T |
| 0.49380933190500 | 0.95646400651600 | 0.19181822272400 | T | T | T |
| 0.49380933190000 | 0.95646400651500 | 0.52515155605100 | T | T | T |
| 0.49380933190000 | 0.95646400651000 | 0.85848488939100 | T | T | T |
| 0.82715011522000 | 0.95646511205400 | 0.19181606312400 | T | T | T |
| 0.82715011522000 | 0.95646511204800 | 0.52514939645700 | T | T | T |
| 0.82715011521900 | 0.95646511204500 | 0.85848272979400 | T | T | T |

6) Large supercell 1-H<sup>+</sup><sub>sol</sub> FS

POSCAR

1

|                   |                   |                   |
|-------------------|-------------------|-------------------|
| 46.81727999995964 | 0.00000000000000  | 0.00000000000000  |
| 0.00000000000000  | 30.38812199999634 | 0.00000000000000  |
| 0.00000000000000  | 0.00000000000000  | 49.65722999997833 |

Ga P H O

540 540 180 72

Direct

|                  |                  |                  |   |   |   |
|------------------|------------------|------------------|---|---|---|
| 0.12510329344100 | 0.06420636451750 | 0.05506798411420 | T | T | T |
| 0.12734848705300 | 0.06453658490660 | 0.38914289637600 | T | T | T |
| 0.12720490296700 | 0.06474955214920 | 0.72335198690500 | T | T | T |
| 0.46041870316100 | 0.06474335172040 | 0.05676439956280 | T | T | T |
| 0.46051369109700 | 0.06475628447840 | 0.39006648398400 | T | T | T |
| 0.46052500722500 | 0.06475036063910 | 0.72337729613200 | T | T | T |
| 0.79378969529800 | 0.06475156324900 | 0.05674471095400 | T | T | T |
| 0.79384577423200 | 0.06475842417720 | 0.39007928774700 | T | T | T |
| 0.79386256087900 | 0.06475568910360 | 0.72338098977800 | T | T | T |
| 0.12512654828300 | 0.06427530552910 | 0.27657559942500 | T | T | T |

|                  |                  |                  |   |   |   |
|------------------|------------------|------------------|---|---|---|
| 0.12522080479400 | 0.06456127692600 | 0.61078719244400 | T | T | T |
| 0.12502681632100 | 0.06442175502010 | 0.94319885779000 | T | T | T |
| 0.45853961827600 | 0.06457620841370 | 0.27746208926900 | T | T | T |
| 0.45855053916500 | 0.06457288455730 | 0.61081798122200 | T | T | T |
| 0.45854811354000 | 0.06456142872740 | 0.94414970866100 | T | T | T |
| 0.79187909600200 | 0.06458436852150 | 0.27747083961600 | T | T | T |
| 0.79188491322700 | 0.06456736757040 | 0.61081681243200 | T | T | T |
| 0.79187578049600 | 0.06457881289660 | 0.94415249145200 | T | T | T |
| 0.12538407268300 | 0.06443426261100 | 0.16591137170300 | T | T | T |
| 0.12519954786300 | 0.06377806284240 | 0.49701135549200 | T | T | T |
| 0.12519938957500 | 0.06378126741690 | 0.83035303220200 | T | T | T |
| 0.45845818296100 | 0.06378928861770 | 0.16372453124300 | T | T | T |
| 0.45853227252700 | 0.06377593258350 | 0.49703901514700 | T | T | T |
| 0.45853095214400 | 0.06377763283160 | 0.83036987234400 | T | T | T |
| 0.79185304004900 | 0.06380038263550 | 0.16372026544300 | T | T | T |
| 0.79186128648400 | 0.06377959369390 | 0.49704515615700 | T | T | T |
| 0.79185634941400 | 0.06378578126230 | 0.83037366218400 | T | T | T |
| 0.29211699222400 | 0.06421850317420 | 0.05496036638980 | T | T | T |
| 0.29199488030400 | 0.06427442946910 | 0.38834103229000 | T | T | T |
| 0.29200038175300 | 0.06426278068660 | 0.72169314966500 | T | T | T |
| 0.62531791111300 | 0.06425561361580 | 0.05505286828470 | T | T | T |
| 0.62533343053200 | 0.06425703262480 | 0.38838633239800 | T | T | T |
| 0.62533065630900 | 0.06425869319480 | 0.72170563490600 | T | T | T |
| 0.95830538357200 | 0.06429570047320 | 0.05504233716070 | T | T | T |
| 0.95866576250500 | 0.06426930149370 | 0.38839113484600 | T | T | T |
| 0.95866048431900 | 0.06426049417410 | 0.72169680476500 | T | T | T |
| 0.29174447644300 | 0.06431239893500 | 0.27741289087900 | T | T | T |
| 0.29182504873200 | 0.06436906422660 | 0.61075848653100 | T | T | T |
| 0.29185394554200 | 0.06438680807690 | 0.94407406782600 | T | T | T |
| 0.62515780604700 | 0.06436573034090 | 0.27747855604200 | T | T | T |



|                  |                  |                  |   |   |   |
|------------------|------------------|------------------|---|---|---|
| 0.62515591356000 | 0.06436488730620 | 0.61079451140300 | T | T | T |
| 0.62515253045600 | 0.06436383568030 | 0.94414198845600 | T | T | T |
| 0.95845011424900 | 0.06434682308360 | 0.27749808910100 | T | T | T |
| 0.95848809978300 | 0.06437003926500 | 0.61078459046200 | T | T | T |
| 0.95839433818500 | 0.06426991960090 | 0.94338463009500 | T | T | T |
| 0.29190788530700 | 0.06413439280140 | 0.16571486985800 | T | T | T |
| 0.29207488216700 | 0.06421181233040 | 0.49899667767400 | T | T | T |
| 0.29208511235900 | 0.06422140919700 | 0.83233083039100 | T | T | T |
| 0.62540198939500 | 0.06420509970390 | 0.16569436515000 | T | T | T |
| 0.62540838874500 | 0.06420994635210 | 0.49901455903400 | T | T | T |
| 0.62540605649400 | 0.06420698262690 | 0.83234478817600 | T | T | T |
| 0.95874964746900 | 0.06422097145200 | 0.16573016622600 | T | T | T |
| 0.95874116513300 | 0.06420644283030 | 0.49900833348100 | T | T | T |
| 0.95873537613400 | 0.06421737316490 | 0.83233247127200 | T | T | T |
| 0.12510623757900 | 0.19650649930800 | 0.05509012926000 | T | T | T |
| 0.12736129102300 | 0.19616592241700 | 0.38914402598300 | T | T | T |
| 0.12721329493900 | 0.19598348184100 | 0.72335430789000 | T | T | T |
| 0.46043584318900 | 0.19597848601400 | 0.05676566882350 | T | T | T |
| 0.46052682944400 | 0.19596309014400 | 0.39008315698500 | T | T | T |
| 0.46054009302500 | 0.19598302445100 | 0.72337752326000 | T | T | T |
| 0.79381423245100 | 0.19597984145100 | 0.05674912304140 | T | T | T |
| 0.79386212917900 | 0.19596650732000 | 0.39009060276900 | T | T | T |
| 0.79387294864800 | 0.19597783281500 | 0.72338748769700 | T | T | T |
| 0.12531489401600 | 0.19654261412100 | 0.27661832992400 | T | T | T |
| 0.12522888440800 | 0.19635264052300 | 0.61008822710000 | T | T | T |
| 0.12509256023300 | 0.19635443706900 | 0.94322863095300 | T | T | T |
| 0.45850098278900 | 0.19617626624100 | 0.27759513979800 | T | T | T |
| 0.45855813939200 | 0.19632623131500 | 0.61018978625100 | T | T | T |
| 0.45855255249600 | 0.19629829461000 | 0.94366937654300 | T | T | T |
| 0.79184319620000 | 0.19617477290900 | 0.27758783692100 | T | T | T |

|                  |                  |                  |   |   |   |
|------------------|------------------|------------------|---|---|---|
| 0.79189061963200 | 0.19632235472100 | 0.61020669571400 | T | T | T |
| 0.79188365735700 | 0.19630099230500 | 0.94360668270400 | T | T | T |
| 0.12552219360300 | 0.19633437375300 | 0.16600701204200 | T | T | T |
| 0.12523118053300 | 0.19765114188200 | 0.49695502503800 | T | T | T |
| 0.12522238934300 | 0.19750778284900 | 0.83030487438300 | T | T | T |
| 0.45859290659300 | 0.19857868756100 | 0.16367548991000 | T | T | T |
| 0.45856386989600 | 0.19770929494200 | 0.49697396571300 | T | T | T |
| 0.45856735131200 | 0.19799713073700 | 0.83028213424400 | T | T | T |
| 0.79199004192600 | 0.19857394747300 | 0.16367485170300 | T | T | T |
| 0.79189550618200 | 0.19779150848100 | 0.49697231759200 | T | T | T |
| 0.79189622033100 | 0.19775926703500 | 0.83030548666600 | T | T | T |
| 0.29211186523000 | 0.19649832103400 | 0.05496509305640 | T | T | T |
| 0.29199478436300 | 0.19641300657800 | 0.38834233845900 | T | T | T |
| 0.29200018937500 | 0.19643727194500 | 0.72170517755600 | T | T | T |
| 0.62532290652200 | 0.19645006678200 | 0.05506395272940 | T | T | T |
| 0.62533450274000 | 0.19643819858400 | 0.38839368855000 | T | T | T |
| 0.62533352817500 | 0.19644361432600 | 0.72171541659100 | T | T | T |
| 0.95831075106800 | 0.19640002073900 | 0.05505349897700 | T | T | T |
| 0.95866936659000 | 0.19642543950300 | 0.38840092310400 | T | T | T |
| 0.95866110598100 | 0.19644141206800 | 0.72170879428700 | T | T | T |
| 0.29168772710200 | 0.19640184729300 | 0.27755591751500 | T | T | T |
| 0.29183047470300 | 0.19632129115800 | 0.61082682810100 | T | T | T |
| 0.29182915375000 | 0.19630013074000 | 0.94420243522100 | T | T | T |
| 0.62523101341900 | 0.19626749185300 | 0.27766660618400 | T | T | T |
| 0.62516419259300 | 0.19632799055400 | 0.61085394781100 | T | T | T |
| 0.62515665166000 | 0.19633240859800 | 0.94419207295200 | T | T | T |
| 0.95856231545700 | 0.19628857689100 | 0.27768853791900 | T | T | T |
| 0.95849609706000 | 0.19632136577300 | 0.61085060399300 | T | T | T |
| 0.95842782441700 | 0.19630820555400 | 0.94412298382700 | T | T | T |
| 0.29189332227400 | 0.19658100617000 | 0.16575104799600 | T | T | T |

|                  |                  |                  |   |   |   |
|------------------|------------------|------------------|---|---|---|
| 0.29205049588400 | 0.19650714188400 | 0.49903505185700 | T | T | T |
| 0.29206763975700 | 0.19649944483000 | 0.83236370009400 | T | T | T |
| 0.62527825395700 | 0.19655328721800 | 0.16582324595600 | T | T | T |
| 0.62538239219300 | 0.19651040863000 | 0.49905744126800 | T | T | T |
| 0.62538279722900 | 0.19651364166100 | 0.83238735491100 | T | T | T |
| 0.95865391737700 | 0.19653063624200 | 0.16587025704500 | T | T | T |
| 0.95871375854400 | 0.19651148752300 | 0.49905094395000 | T | T | T |
| 0.95871269019600 | 0.19650812717400 | 0.83237475199200 | T | T | T |
| 0.99931881113900 | 0.01562387071130 | 0.00741137852280 | T | T | T |
| 0.00068706983858 | 0.01554054312350 | 0.34099388841000 | T | T | T |
| 0.00063592844033 | 0.01561471282540 | 0.67422181033300 | T | T | T |
| 0.33403038220700 | 0.01556045883920 | 0.00751602193260 | T | T | T |
| 0.33388843682300 | 0.01562942448360 | 0.34087434086100 | T | T | T |
| 0.33397973064200 | 0.01561846453600 | 0.67421753967700 | T | T | T |
| 0.66727983874700 | 0.01558893987090 | 0.00755124524844 | T | T | T |
| 0.66730269583200 | 0.01559637925960 | 0.34089530196900 | T | T | T |
| 0.66730593495700 | 0.01560276652170 | 0.67422210785900 | T | T | T |
| 0.33239515377400 | 0.01557099012740 | 0.22989777283800 | T | T | T |
| 0.33244523218400 | 0.01558255091960 | 0.56320929030400 | T | T | T |
| 0.33246918651600 | 0.01557263338990 | 0.89654986980100 | T | T | T |
| 0.66577957156800 | 0.01556757838530 | 0.22988467058500 | T | T | T |
| 0.66577920151300 | 0.01557121556220 | 0.56321326606400 | T | T | T |
| 0.66577730123300 | 0.01556242027000 | 0.89654750252600 | T | T | T |
| 0.99916675306100 | 0.01558261440670 | 0.23003820498800 | T | T | T |
| 0.99911764851400 | 0.01557908390490 | 0.56321108061400 | T | T | T |
| 0.99913977590800 | 0.01555259199700 | 0.89649735443200 | T | T | T |
| 0.00100995719111 | 0.01549124575190 | 0.11804149167900 | T | T | T |
| 0.00086703627696 | 0.01564664001640 | 0.45130752569800 | T | T | T |
| 0.00085003519930 | 0.01564816151450 | 0.78464874947100 | T | T | T |
| 0.33261779929300 | 0.01560781623890 | 0.11802115891600 | T | T | T |

|                  |                  |                  |   |   |   |
|------------------|------------------|------------------|---|---|---|
| 0.33418894427600 | 0.01565460486360 | 0.45131147729000 | T | T | T |
| 0.33420186083100 | 0.01564858356110 | 0.78464592438500 | T | T | T |
| 0.66752329779500 | 0.01562856464030 | 0.11797996770600 | T | T | T |
| 0.66752451212100 | 0.01563888302340 | 0.45131353783300 | T | T | T |
| 0.66752716380800 | 0.01563705274210 | 0.78464382186000 | T | T | T |
| 0.16604376860700 | 0.01555967216490 | 0.00760468288419 | T | T | T |
| 0.16615109656900 | 0.01542273183430 | 0.34083301370000 | T | T | T |
| 0.16609319794100 | 0.01545424023140 | 0.67569061432600 | T | T | T |
| 0.49939525252800 | 0.01541817343780 | 0.00904187108385 | T | T | T |
| 0.49939311182200 | 0.01544746502560 | 0.34237418899200 | T | T | T |
| 0.49941989596100 | 0.01544098964340 | 0.67570021844200 | T | T | T |
| 0.83263107498700 | 0.01544468742110 | 0.00901884395223 | T | T | T |
| 0.83275382092900 | 0.01544064020680 | 0.34238130783600 | T | T | T |
| 0.83275506683600 | 0.01544332827080 | 0.67569971401200 | T | T | T |
| 0.16561150402200 | 0.00848488097008 | 0.22428532209000 | T | T | T |
| 0.16525642067300 | 0.01284355011290 | 0.55759691696300 | T | T | T |
| 0.16528436347400 | 0.01275630223180 | 0.89085621601900 | T | T | T |
| 0.49859181947600 | 0.01284636925310 | 0.22427135843200 | T | T | T |
| 0.49858806562700 | 0.01280749559900 | 0.55760428692000 | T | T | T |
| 0.49859379082900 | 0.01280072306720 | 0.89094877298800 | T | T | T |
| 0.83192332437300 | 0.01281073877850 | 0.22427346565400 | T | T | T |
| 0.83192942681400 | 0.01282669764650 | 0.55761691860300 | T | T | T |
| 0.83191319345500 | 0.01281172632890 | 0.89093549646600 | T | T | T |
| 0.16748095604100 | 0.01549111025570 | 0.11805474292000 | T | T | T |
| 0.16321516283400 | 0.98072783728800 | 0.43639565708200 | T | T | T |
| 0.16322410676800 | 0.98066299402600 | 0.76976509279400 | T | T | T |
| 0.49651238025900 | 0.98059488830400 | 0.10308576464800 | T | T | T |
| 0.49654919030600 | 0.98063579250300 | 0.43642750343500 | T | T | T |
| 0.49655609192500 | 0.98063833644100 | 0.76975474260400 | T | T | T |
| 0.82988853533000 | 0.98058940059200 | 0.10307898224600 | T | T | T |

|                  |                  |                  |   |   |   |
|------------------|------------------|------------------|---|---|---|
| 0.82989251639800 | 0.98062823236200 | 0.43642490033700 | T | T | T |
| 0.82988961313100 | 0.98064238502500 | 0.76975661450000 | T | T | T |
| 0.08311320896820 | 0.01576072760930 | 0.00732279340841 | T | T | T |
| 0.08360479023920 | 0.01573585003620 | 0.34080726137100 | T | T | T |
| 0.08352618540750 | 0.01579796695080 | 0.67422667166800 | T | T | T |
| 0.41685604877300 | 0.01575181135420 | 0.00755210601569 | T | T | T |
| 0.41683469795900 | 0.01579211744580 | 0.34091038407100 | T | T | T |
| 0.41685993080900 | 0.01579030579050 | 0.67423187815400 | T | T | T |
| 0.75015846864300 | 0.01577710455350 | 0.00755951477597 | T | T | T |
| 0.75019347359400 | 0.01578426059670 | 0.34090909566700 | T | T | T |
| 0.75019289794400 | 0.01578579044650 | 0.67423365925200 | T | T | T |
| 0.08169869299700 | 0.01559626770990 | 0.22991102297100 | T | T | T |
| 0.08115768359960 | 0.01588723808310 | 0.56152329869400 | T | T | T |
| 0.08107376102920 | 0.01585830098330 | 0.89480902004800 | T | T | T |
| 0.41446254379100 | 0.01586732361800 | 0.22818632195800 | T | T | T |
| 0.41448063704900 | 0.01587061462650 | 0.56152869732000 | T | T | T |
| 0.41449576879200 | 0.01585472563870 | 0.89486202773300 | T | T | T |
| 0.74780873172400 | 0.01585105058260 | 0.22819335934600 | T | T | T |
| 0.74782382578600 | 0.01586603607070 | 0.56152895883000 | T | T | T |
| 0.74781238747500 | 0.01586289120790 | 0.89486105454900 | T | T | T |
| 0.08351808585960 | 0.01553316960020 | 0.11921542391000 | T | T | T |
| 0.08347759698650 | 0.01269785547040 | 0.45340263605200 | T | T | T |
| 0.08344832199880 | 0.01261736893130 | 0.78686916419700 | T | T | T |
| 0.41650520667100 | 0.01249197151670 | 0.12022586554000 | T | T | T |
| 0.41677486989400 | 0.01259916439640 | 0.45353324223300 | T | T | T |
| 0.41678685730000 | 0.01260510655160 | 0.78685860921600 | T | T | T |
| 0.75013051378400 | 0.01256798712300 | 0.12020262574600 | T | T | T |
| 0.75012303839600 | 0.01259091755820 | 0.45353862335100 | T | T | T |
| 0.75011117079900 | 0.01259786440600 | 0.78685913472000 | T | T | T |
| 0.25006498288400 | 0.01559573527770 | 0.00753824982444 | T | T | T |

|                  |                  |                  |   |   |   |
|------------------|------------------|------------------|---|---|---|
| 0.24986652249200 | 0.01573605131350 | 0.34092755181000 | T | T | T |
| 0.24989585474700 | 0.01568946840610 | 0.67437562046700 | T | T | T |
| 0.58321008892800 | 0.01565597730470 | 0.00771497743097 | T | T | T |
| 0.58321551423000 | 0.01567336704430 | 0.34105819368800 | T | T | T |
| 0.58322279955800 | 0.01567202577940 | 0.67438298660700 | T | T | T |
| 0.91632351800700 | 0.01573004084010 | 0.00759273614934 | T | T | T |
| 0.91657346665400 | 0.01565898658160 | 0.34107777733700 | T | T | T |
| 0.91655344392800 | 0.01568251292370 | 0.67438289714000 | T | T | T |
| 0.24992022227500 | 0.01569172925780 | 0.22866438436700 | T | T | T |
| 0.25032461667500 | 0.01610932741740 | 0.56187853086900 | T | T | T |
| 0.25037641606700 | 0.01613930618230 | 0.89520054665200 | T | T | T |
| 0.58364844147600 | 0.01605555391610 | 0.22855906865400 | T | T | T |
| 0.58365533378400 | 0.01607917908060 | 0.56188900198700 | T | T | T |
| 0.58365635471100 | 0.01606821474530 | 0.89521932555500 | T | T | T |
| 0.91695836457600 | 0.01605235906500 | 0.22856054730600 | T | T | T |
| 0.91699265982800 | 0.01609568119170 | 0.56189210842600 | T | T | T |
| 0.91692552760300 | 0.01600761978680 | 0.89512488721300 | T | T | T |
| 0.24999458134400 | 0.01572621582620 | 0.11793504507200 | T | T | T |
| 0.25252909574000 | 0.01619644007470 | 0.45099705205900 | T | T | T |
| 0.25252825671400 | 0.01617937333930 | 0.78435234092800 | T | T | T |
| 0.58583663094600 | 0.01612021597720 | 0.11768709197400 | T | T | T |
| 0.58584849399600 | 0.01614781846460 | 0.45102351971000 | T | T | T |
| 0.58585331667300 | 0.01614272446370 | 0.78435240848300 | T | T | T |
| 0.91930101863600 | 0.01603223267790 | 0.11770301408900 | T | T | T |
| 0.91918851722800 | 0.01613662008250 | 0.45102890761700 | T | T | T |
| 0.91917837763700 | 0.01616241823730 | 0.78435591063700 | T | T | T |
| 0.04155934941180 | 0.06417241465700 | 0.05497954892060 | T | T | T |
| 0.04315271977620 | 0.06422677417980 | 0.38862130801400 | T | T | T |
| 0.04310852168180 | 0.06421241227350 | 0.72192802677500 | T | T | T |
| 0.37639588342900 | 0.06417691566270 | 0.05530530519240 | T | T | T |

|                  |                  |                  |   |   |   |
|------------------|------------------|------------------|---|---|---|
| 0.37643118392100 | 0.06422937785690 | 0.38859484412300 | T | T | T |
| 0.37644142875300 | 0.06421713260960 | 0.72192770420100 | T | T | T |
| 0.70976054922700 | 0.06420868947200 | 0.05527258406110 | T | T | T |
| 0.70977386389400 | 0.06422755899260 | 0.38861398284800 | T | T | T |
| 0.70977542671700 | 0.06421548807730 | 0.72193447092300 | T | T | T |
| 0.04149099142350 | 0.06439196494990 | 0.27760571126100 | T | T | T |
| 0.04143372536660 | 0.06424503327420 | 0.60995298258200 | T | T | T |
| 0.04132175865680 | 0.06427751649310 | 0.94348854286900 | T | T | T |
| 0.37475273662100 | 0.06423326838250 | 0.27671134151000 | T | T | T |
| 0.37476983166700 | 0.06424886279410 | 0.60996525423600 | T | T | T |
| 0.37477597819800 | 0.06424100085610 | 0.94331566586300 | T | T | T |
| 0.70811212455500 | 0.06424361537260 | 0.27671278783400 | T | T | T |
| 0.70810495022500 | 0.06424169516260 | 0.60997547966500 | T | T | T |
| 0.70810373970600 | 0.06424667273150 | 0.94332552643100 | T | T | T |
| 0.04143377796900 | 0.06426624552070 | 0.16594346467000 | T | T | T |
| 0.04143498013700 | 0.06420828159430 | 0.49910478863600 | T | T | T |
| 0.04141756593540 | 0.06424135274070 | 0.83243426615300 | T | T | T |
| 0.37464517073800 | 0.06413968249530 | 0.16575326176200 | T | T | T |
| 0.37475753722300 | 0.06422896459940 | 0.49911395550700 | T | T | T |
| 0.37475531626700 | 0.06422952503910 | 0.83245209427400 | T | T | T |
| 0.70808899880900 | 0.06422637131830 | 0.16580342174700 | T | T | T |
| 0.70808938224600 | 0.06422844868240 | 0.49912792214800 | T | T | T |
| 0.70808709543700 | 0.06422714889670 | 0.83245615147400 | T | T | T |
| 0.20815074839900 | 0.06422225988200 | 0.05493613008110 | T | T | T |
| 0.20590953266500 | 0.06441118230460 | 0.38870608789600 | T | T | T |
| 0.20601898313500 | 0.06448909780770 | 0.72216461050300 | T | T | T |
| 0.53932786220000 | 0.06446835566490 | 0.05552417095590 | T | T | T |
| 0.53934720530400 | 0.06448611141350 | 0.38885290766800 | T | T | T |
| 0.53935191396800 | 0.06448027786120 | 0.72217536084300 | T | T | T |
| 0.87259332168100 | 0.06445987373920 | 0.05550378870140 | T | T | T |

|                   |                  |                   |   |   |   |
|-------------------|------------------|-------------------|---|---|---|
| 0.87269560753200  | 0.06449349467040 | 0.38887097272500  | T | T | T |
| 0.87267583674800  | 0.06448985526230 | 0.72217377645700  | T | T | T |
| 0.20799850808900  | 0.06434571999230 | 0.27753129944000  | T | T | T |
| 0.20788080974900  | 0.06440755910400 | 0.61108783611100  | T | T | T |
| 0.20794460952300  | 0.06444753570570 | 0.94432673857400  | T | T | T |
| 0.54120772550500  | 0.06440699075420 | 0.27779709882000  | T | T | T |
| 0.54121472110800  | 0.06440412841480 | 0.61110283099800  | T | T | T |
| 0.54121118483900  | 0.06440087488320 | 0.94445345802000  | T | T | T |
| 0.87454137519500  | 0.06441907097320 | 0.27781251534400  | T | T | T |
| 0.87454639830400  | 0.06441701021320 | 0.61110745856800  | T | T | T |
| 0.87454248397400  | 0.06439571126770 | 0.94445283719500  | T | T | T |
| 0.20788074326700  | 0.06416589282380 | 0.16571736429900  | T | T | T |
| 0.20811169709700  | 0.06652200211440 | 0.49907383758100  | T | T | T |
| 0.20811893331900  | 0.06658132458770 | 0.83241773481600  | T | T | T |
| 0.54144073545500  | 0.06650263245410 | 0.16576801241400  | T | T | T |
| 0.54144702307400  | 0.06652319055960 | 0.49909265053400  | T | T | T |
| 0.54144628753900  | 0.06651929763260 | 0.83242819879800  | T | T | T |
| 0.87478383862200  | 0.06651349111480 | 0.16576719136600  | T | T | T |
| 0.87477605857000  | 0.06651278831650 | 0.49909660052500  | T | T | T |
| 0.87476796204600  | 0.06654074405340 | 0.83241624201700  | T | T | T |
| 0.00000000000000  | 0.13043999673400 | 0.00000000000000  | F | F | F |
| 0.00000000000000  | 0.13043999673400 | 0.333333333333400 | F | F | F |
| 0.00000000000000  | 0.13043999673400 | 0.666666666666600 | F | F | F |
| 0.333333333333400 | 0.13043999673400 | 0.000000000000000 | F | F | F |
| 0.333333333333400 | 0.13043999673400 | 0.333333333333400 | F | F | F |
| 0.333333333333400 | 0.13043999673400 | 0.666666666666600 | F | F | F |
| 0.666666666666600 | 0.13043999673400 | 0.000000000000000 | F | F | F |
| 0.666666666666600 | 0.13043999673400 | 0.333333333333400 | F | F | F |
| 0.666666666666600 | 0.13043999673400 | 0.666666666666600 | F | F | F |
| 0.000000000000000 | 0.13043999673400 | 0.22222334138000  | F | F | F |



|                    |                  |                   |   |   |   |
|--------------------|------------------|-------------------|---|---|---|
| 0.0000000000000000 | 0.13043999673400 | 0.55555667471300  | F | F | F |
| 0.0000000000000000 | 0.13043999673400 | 0.88889000804700  | F | F | F |
| 0.333333333333400  | 0.13043999673400 | 0.22222334138000  | F | F | F |
| 0.333333333333400  | 0.13043999673400 | 0.55555667471300  | F | F | F |
| 0.333333333333400  | 0.13043999673400 | 0.88889000804700  | F | F | F |
| 0.666666666666600  | 0.13043999673400 | 0.22222334138000  | F | F | F |
| 0.666666666666600  | 0.13043999673400 | 0.55555667471300  | F | F | F |
| 0.666666666666600  | 0.13043999673400 | 0.88889000804700  | F | F | F |
| 0.0000000000000000 | 0.13043999673400 | 0.11111000180100  | F | F | F |
| 0.0000000000000000 | 0.13043999673400 | 0.44444333513300  | F | F | F |
| 0.0000000000000000 | 0.13043999673400 | 0.77777666846700  | F | F | F |
| 0.333333333333400  | 0.13043999673400 | 0.11111000180100  | F | F | F |
| 0.333333333333400  | 0.13043999673400 | 0.44444333513300  | F | F | F |
| 0.333333333333400  | 0.13043999673400 | 0.77777666846700  | F | F | F |
| 0.666666666666600  | 0.13043999673400 | 0.11111000180100  | F | F | F |
| 0.666666666666600  | 0.13043999673400 | 0.44444333513300  | F | F | F |
| 0.666666666666600  | 0.13043999673400 | 0.77777666846700  | F | F | F |
| 0.16666666667500   | 0.13043999673400 | 0.00000000000000  | F | F | F |
| 0.16666666667500   | 0.13043999673400 | 0.333333333333400 | F | F | F |
| 0.16666666667500   | 0.13043999673400 | 0.666666666666600 | F | F | F |
| 0.50000000000900   | 0.13043999673400 | 0.00000000000000  | F | F | F |
| 0.50000000000900   | 0.13043999673400 | 0.333333333333400 | F | F | F |
| 0.50000000000900   | 0.13043999673400 | 0.666666666666600 | F | F | F |
| 0.83333333334100   | 0.13043999673400 | 0.00000000000000  | F | F | F |
| 0.83333333334100   | 0.13043999673400 | 0.333333333333400 | F | F | F |
| 0.83333333334100   | 0.13043999673400 | 0.666666666666600 | F | F | F |
| 0.16666666667500   | 0.13043999673400 | 0.22222334138000  | F | F | F |
| 0.16666666667500   | 0.13043999673400 | 0.55555667471300  | F | F | F |
| 0.16666666667500   | 0.13043999673400 | 0.88889000804700  | F | F | F |
| 0.50000000000900   | 0.13043999673400 | 0.22222334138000  | F | F | F |

|                  |                  |                  |   |   |   |
|------------------|------------------|------------------|---|---|---|
| 0.50000000000900 | 0.13043999673400 | 0.55555667471300 | F | F | F |
| 0.50000000000900 | 0.13043999673400 | 0.88889000804700 | F | F | F |
| 0.83333333334100 | 0.13043999673400 | 0.22222334138000 | F | F | F |
| 0.83333333334100 | 0.13043999673400 | 0.55555667471300 | F | F | F |
| 0.83333333334100 | 0.13043999673400 | 0.88889000804700 | F | F | F |
| 0.16666666667500 | 0.13043999673400 | 0.11111000180100 | F | F | F |
| 0.16666666667500 | 0.13043999673400 | 0.44444333513300 | F | F | F |
| 0.16666666667500 | 0.13043999673400 | 0.77777666846700 | F | F | F |
| 0.50000000000900 | 0.13043999673400 | 0.11111000180100 | F | F | F |
| 0.50000000000900 | 0.13043999673400 | 0.44444333513300 | F | F | F |
| 0.50000000000900 | 0.13043999673400 | 0.77777666846700 | F | F | F |
| 0.83333333334100 | 0.13043999673400 | 0.11111000180100 | F | F | F |
| 0.83333333334100 | 0.13043999673400 | 0.44444333513300 | F | F | F |
| 0.83333333334100 | 0.13043999673400 | 0.77777666846700 | F | F | F |
| 0.08333333332670 | 0.13043999673400 | 0.00000000000000 | F | F | F |
| 0.08333333332670 | 0.13043999673400 | 0.33333333333400 | F | F | F |
| 0.08333333332670 | 0.13043999673400 | 0.66666666666600 | F | F | F |
| 0.41666666666100 | 0.13043999673400 | 0.00000000000000 | F | F | F |
| 0.41666666666100 | 0.13043999673400 | 0.33333333333400 | F | F | F |
| 0.41666666666100 | 0.13043999673400 | 0.66666666666600 | F | F | F |
| 0.7499999999300  | 0.13043999673400 | 0.00000000000000 | F | F | F |
| 0.7499999999300  | 0.13043999673400 | 0.33333333333400 | F | F | F |
| 0.7499999999300  | 0.13043999673400 | 0.66666666666600 | F | F | F |
| 0.08333333332670 | 0.13043999673400 | 0.22222334138000 | F | F | F |
| 0.08333333332670 | 0.13043999673400 | 0.55555667471300 | F | F | F |
| 0.08333333332670 | 0.13043999673400 | 0.88889000804700 | F | F | F |
| 0.41666666666100 | 0.13043999673400 | 0.22222334138000 | F | F | F |
| 0.41666666666100 | 0.13043999673400 | 0.55555667471300 | F | F | F |
| 0.41666666666100 | 0.13043999673400 | 0.88889000804700 | F | F | F |
| 0.7499999999300  | 0.13043999673400 | 0.22222334138000 | F | F | F |

|                  |                  |                  |   |   |   |
|------------------|------------------|------------------|---|---|---|
| 0.7499999999300  | 0.13043999673400 | 0.55555667471300 | F | F | F |
| 0.7499999999300  | 0.13043999673400 | 0.88889000804700 | F | F | F |
| 0.0833333332670  | 0.13043999673400 | 0.11111000180100 | F | F | F |
| 0.0833333332670  | 0.13043999673400 | 0.44444333513300 | F | F | F |
| 0.0833333332670  | 0.13043999673400 | 0.77777666846700 | F | F | F |
| 0.4166666666100  | 0.13043999673400 | 0.11111000180100 | F | F | F |
| 0.4166666666100  | 0.13043999673400 | 0.44444333513300 | F | F | F |
| 0.4166666666100  | 0.13043999673400 | 0.77777666846700 | F | F | F |
| 0.7499999999300  | 0.13043999673400 | 0.11111000180100 | F | F | F |
| 0.7499999999300  | 0.13043999673400 | 0.44444333513300 | F | F | F |
| 0.7499999999300  | 0.13043999673400 | 0.77777666846700 | F | F | F |
| 0.2500000008900  | 0.13043999673400 | 0.00000000000000 | F | F | F |
| 0.2500000008900  | 0.13043999673400 | 0.33333333333400 | F | F | F |
| 0.2500000008900  | 0.13043999673400 | 0.66666666666600 | F | F | F |
| 0.58333333342100 | 0.13043999673400 | 0.00000000000000 | F | F | F |
| 0.58333333342100 | 0.13043999673400 | 0.33333333333400 | F | F | F |
| 0.58333333342100 | 0.13043999673400 | 0.66666666666600 | F | F | F |
| 0.91666666675500 | 0.13043999673400 | 0.00000000000000 | F | F | F |
| 0.91666666675500 | 0.13043999673400 | 0.33333333333400 | F | F | F |
| 0.91666666675500 | 0.13043999673400 | 0.66666666666600 | F | F | F |
| 0.2500000008900  | 0.13043999673400 | 0.22222334138000 | F | F | F |
| 0.2500000008900  | 0.13043999673400 | 0.55555667471300 | F | F | F |
| 0.2500000008900  | 0.13043999673400 | 0.88889000804700 | F | F | F |
| 0.58333333342100 | 0.13043999673400 | 0.22222334138000 | F | F | F |
| 0.58333333342100 | 0.13043999673400 | 0.55555667471300 | F | F | F |
| 0.58333333342100 | 0.13043999673400 | 0.88889000804700 | F | F | F |
| 0.91666666675500 | 0.13043999673400 | 0.22222334138000 | F | F | F |
| 0.91666666675500 | 0.13043999673400 | 0.55555667471300 | F | F | F |
| 0.91666666675500 | 0.13043999673400 | 0.88889000804700 | F | F | F |
| 0.2500000008900  | 0.13043999673400 | 0.11111000180100 | F | F | F |

|                  |                  |                  |   |   |   |
|------------------|------------------|------------------|---|---|---|
| 0.25000000008900 | 0.13043999673400 | 0.44444333513300 | F | F | F |
| 0.25000000008900 | 0.13043999673400 | 0.77777666846700 | F | F | F |
| 0.58333333342100 | 0.13043999673400 | 0.11111000180100 | F | F | F |
| 0.58333333342100 | 0.13043999673400 | 0.44444333513300 | F | F | F |
| 0.58333333342100 | 0.13043999673400 | 0.77777666846700 | F | F | F |
| 0.91666666675500 | 0.13043999673400 | 0.11111000180100 | F | F | F |
| 0.91666666675500 | 0.13043999673400 | 0.44444333513300 | F | F | F |
| 0.91666666675500 | 0.13043999673400 | 0.77777666846700 | F | F | F |
| 0.04155461543600 | 0.19654981730300 | 0.05499741407100 | T | T | T |
| 0.04315361003330 | 0.19647723382100 | 0.38862291211300 | T | T | T |
| 0.04310726627970 | 0.19648717482500 | 0.72192778316700 | T | T | T |
| 0.37638438812500 | 0.19652965723200 | 0.05530909105970 | T | T | T |
| 0.37642980211800 | 0.19647093144600 | 0.38859578275200 | T | T | T |
| 0.37643983887300 | 0.19648250561400 | 0.72192823834900 | T | T | T |
| 0.70976364637800 | 0.19649636122200 | 0.05527470411310 | T | T | T |
| 0.70977122677800 | 0.19647735490700 | 0.38861492983900 | T | T | T |
| 0.70977500259600 | 0.19648674647900 | 0.72193493761000 | T | T | T |
| 0.04158879681580 | 0.19638180241000 | 0.27752215348200 | T | T | T |
| 0.04146359820140 | 0.19645603167200 | 0.61005163296200 | T | T | T |
| 0.04137004260070 | 0.19645800437900 | 0.94336860738000 | T | T | T |
| 0.37473420396500 | 0.19648635622900 | 0.27670650345500 | T | T | T |
| 0.37479684570200 | 0.19644977747700 | 0.61005638814100 | T | T | T |
| 0.37479825199500 | 0.19645505921400 | 0.94339957439900 | T | T | T |
| 0.70811038746000 | 0.19646884232300 | 0.27670277211900 | T | T | T |
| 0.70812898236800 | 0.19645546663700 | 0.61007885455400 | T | T | T |
| 0.70812499086400 | 0.19645792816400 | 0.94341595329200 | T | T | T |
| 0.04148280365360 | 0.19648633935800 | 0.16602860012500 | T | T | T |
| 0.04143437913700 | 0.19650636661300 | 0.49911736127200 | T | T | T |
| 0.04141579022900 | 0.19648365908000 | 0.83244772170900 | T | T | T |
| 0.37467026332200 | 0.19659590566100 | 0.16577690443200 | T | T | T |

|                  |                  |                  |   |   |   |
|------------------|------------------|------------------|---|---|---|
| 0.37475825857100 | 0.19648284725300 | 0.49912254182500 | T | T | T |
| 0.37476087032500 | 0.19648469964500 | 0.83246442646100 | T | T | T |
| 0.70811576307000 | 0.19651253157600 | 0.16582974944500 | T | T | T |
| 0.70809280767500 | 0.19648542578300 | 0.49913844274800 | T | T | T |
| 0.70809241797100 | 0.19648680311000 | 0.83246744192500 | T | T | T |
| 0.20814653370500 | 0.19649909404000 | 0.05494768955330 | T | T | T |
| 0.20590451726200 | 0.19629567988900 | 0.38871593935900 | T | T | T |
| 0.20600454201400 | 0.19622061060700 | 0.72217118482100 | T | T | T |
| 0.53931644173500 | 0.19623641042400 | 0.05554483440890 | T | T | T |
| 0.53933318812400 | 0.19621435424400 | 0.38886682277000 | T | T | T |
| 0.53933640286100 | 0.19622785366400 | 0.72218281042100 | T | T | T |
| 0.87258444230400 | 0.19624230226500 | 0.05552802222890 | T | T | T |
| 0.87268354265600 | 0.19620991720300 | 0.38888680768100 | T | T | T |
| 0.87266314063000 | 0.19621960643100 | 0.72218165652600 | T | T | T |
| 0.20799307588800 | 0.19695427385900 | 0.27644845285300 | T | T | T |
| 0.20784374873600 | 0.19650095811700 | 0.61101764404500 | T | T | T |
| 0.20794483470200 | 0.19660634769400 | 0.94357201229900 | T | T | T |
| 0.54120803946200 | 0.19639226484500 | 0.27787117256000 | T | T | T |
| 0.54118134755800 | 0.19649899522800 | 0.61103920851600 | T | T | T |
| 0.54118612159200 | 0.19650410869800 | 0.94438364474300 | T | T | T |
| 0.87455675569400 | 0.19639031108000 | 0.27788770751700 | T | T | T |
| 0.87451471125000 | 0.19648878297900 | 0.61104204872500 | T | T | T |
| 0.87449677003900 | 0.19650859199900 | 0.94435168533600 | T | T | T |
| 0.20779595341000 | 0.19661602075800 | 0.16580444314000 | T | T | T |
| 0.20811889927200 | 0.19563545104500 | 0.49895097232700 | T | T | T |
| 0.20812354161300 | 0.19561950062800 | 0.83228109169100 | T | T | T |
| 0.54144276827900 | 0.19570616870600 | 0.16582082805100 | T | T | T |
| 0.54145849722300 | 0.19563488109900 | 0.49897545442200 | T | T | T |
| 0.54145050562900 | 0.19564223172800 | 0.83231083221300 | T | T | T |
| 0.87479803009100 | 0.19570708896000 | 0.16582170639400 | T | T | T |

|                  |                  |                  |   |   |   |
|------------------|------------------|------------------|---|---|---|
| 0.87478371567900 | 0.19563535993700 | 0.49897955951700 | T | T | T |
| 0.87477822170700 | 0.19563548941000 | 0.83229751346100 | T | T | T |
| 0.99935856214100 | 0.24507739154000 | 0.00749954062975 | T | T | T |
| 0.00072531464675 | 0.24511927292000 | 0.34104088913200 | T | T | T |
| 0.00063634732205 | 0.24503796489300 | 0.67426705999700 | T | T | T |
| 0.33404082639000 | 0.24508871437900 | 0.00754788108564 | T | T | T |
| 0.33390490657600 | 0.24502080051600 | 0.34091216373200 | T | T | T |
| 0.33397844511600 | 0.24503346216600 | 0.67426209350700 | T | T | T |
| 0.66728317925700 | 0.24506554452200 | 0.00759490603945 | T | T | T |
| 0.66731211995900 | 0.24506731043300 | 0.34095253030000 | T | T | T |
| 0.66730465721900 | 0.24504970649000 | 0.67426700289500 | T | T | T |
| 0.33240613336800 | 0.24504865968500 | 0.22993759671900 | T | T | T |
| 0.33244012099000 | 0.24505813087900 | 0.56327407856800 | T | T | T |
| 0.33245813476900 | 0.24506326140600 | 0.89661956168900 | T | T | T |
| 0.66579866002000 | 0.24504926290800 | 0.22994211442700 | T | T | T |
| 0.66577646183500 | 0.24507064602300 | 0.56327937680100 | T | T | T |
| 0.66577150130900 | 0.24508067657000 | 0.89660855267000 | T | T | T |
| 0.99943793008300 | 0.24506133109300 | 0.23010825211800 | T | T | T |
| 0.99911316149200 | 0.24506199976200 | 0.56327838618800 | T | T | T |
| 0.99909462668100 | 0.24505000666400 | 0.89661270829000 | T | T | T |
| 0.00101633660788 | 0.24516970302600 | 0.11811064564100 | T | T | T |
| 0.00087265425466 | 0.24500845624500 | 0.45134935025500 | T | T | T |
| 0.00085810162724 | 0.24500748999600 | 0.78468619065100 | T | T | T |
| 0.33261757894900 | 0.24504894212200 | 0.11806431371700 | T | T | T |
| 0.33420017325100 | 0.24500121335000 | 0.45134676026300 | T | T | T |
| 0.33420907363900 | 0.24500445830100 | 0.78468254632900 | T | T | T |
| 0.66751385845500 | 0.24501695015400 | 0.11802095982100 | T | T | T |
| 0.66753125473300 | 0.24501493071100 | 0.45135199080900 | T | T | T |
| 0.66753457328700 | 0.24501708303900 | 0.78468267971700 | T | T | T |
| 0.16610075714500 | 0.24501039346000 | 0.00754263068570 | T | T | T |

|                  |                  |                  |   |   |   |
|------------------|------------------|------------------|---|---|---|
| 0.16634249165100 | 0.24511832443800 | 0.34077606312400 | T | T | T |
| 0.16605038324600 | 0.24513561384300 | 0.67560144468200 | T | T | T |
| 0.49937008866700 | 0.24518505290300 | 0.00898897409609 | T | T | T |
| 0.49940344293600 | 0.24521059287400 | 0.34242070829600 | T | T | T |
| 0.49938194355400 | 0.24515434129400 | 0.67562768045200 | T | T | T |
| 0.83261183112900 | 0.24515643131800 | 0.00896366373641 | T | T | T |
| 0.83276436558900 | 0.24521299864500 | 0.34241963403000 | T | T | T |
| 0.83271844478100 | 0.24515230511100 | 0.67563183990800 | T | T | T |
| 0.16585673572100 | 0.25506688504400 | 0.22431942612100 | T | T | T |
| 0.16538574089700 | 0.24822934124900 | 0.55780774945200 | T | T | T |
| 0.16534791646000 | 0.24827520456500 | 0.89101359405600 | T | T | T |
| 0.49872141649300 | 0.24802839218700 | 0.22582911315100 | T | T | T |
| 0.49872275288400 | 0.24823018667900 | 0.55783824121200 | T | T | T |
| 0.49872609425400 | 0.24822428631300 | 0.89122909239500 | T | T | T |
| 0.83208803314100 | 0.24807656666500 | 0.22585713536800 | T | T | T |
| 0.83206069268100 | 0.24822118639600 | 0.55786605012500 | T | T | T |
| 0.83205887122800 | 0.24823169031600 | 0.89120404358600 | T | T | T |
| 0.16747808718000 | 0.24522937825900 | 0.11812518581900 | T | T | T |
| 0.16314905352200 | 0.27999002243400 | 0.43633525758600 | T | T | T |
| 0.16315892246600 | 0.28005485512700 | 0.76970421832800 | T | T | T |
| 0.49647862666600 | 0.28020021973900 | 0.10301094148100 | T | T | T |
| 0.49648545199400 | 0.28010742868700 | 0.43636029511200 | T | T | T |
| 0.49650292173000 | 0.28012326021200 | 0.76967514196600 | T | T | T |
| 0.82986532513900 | 0.28020457027600 | 0.10299763146700 | T | T | T |
| 0.82983360521300 | 0.28011515271300 | 0.43635306395900 | T | T | T |
| 0.82982646737600 | 0.28009826204300 | 0.76968748870700 | T | T | T |
| 0.08312224500530 | 0.24488090193800 | 0.00734429567179 | T | T | T |
| 0.08363066488750 | 0.24490083086300 | 0.34081661852900 | T | T | T |
| 0.08354628878690 | 0.24480273462500 | 0.67418892363200 | T | T | T |
| 0.41687304337200 | 0.24486423282600 | 0.00754258291402 | T | T | T |

|                  |                  |                  |   |   |   |
|------------------|------------------|------------------|---|---|---|
| 0.41683000398900 | 0.24486037637200 | 0.34096321927500 | T | T | T |
| 0.41687819924000 | 0.24481450563100 | 0.67420252922800 | T | T | T |
| 0.75018150482300 | 0.24483434878600 | 0.00754331177334 | T | T | T |
| 0.75019352607100 | 0.24487238165700 | 0.34096355140700 | T | T | T |
| 0.75021205175400 | 0.24481929201100 | 0.67420821706800 | T | T | T |
| 0.08289720516010 | 0.24522477901600 | 0.22999839200300 | T | T | T |
| 0.08113991950500 | 0.24483478770500 | 0.56151367643500 | T | T | T |
| 0.08110216425010 | 0.24482592080800 | 0.89483808304300 | T | T | T |
| 0.41449010117100 | 0.24482262451500 | 0.22825267819200 | T | T | T |
| 0.41445944208400 | 0.24483307068700 | 0.56151158189500 | T | T | T |
| 0.41447121245500 | 0.24484569772100 | 0.89485461912300 | T | T | T |
| 0.74785246044100 | 0.24484276626900 | 0.22825333227700 | T | T | T |
| 0.74780129773300 | 0.24484015239500 | 0.56151564340000 | T | T | T |
| 0.74779377071700 | 0.24483586189300 | 0.89484722047100 | T | T | T |
| 0.08353191722080 | 0.24513575281400 | 0.11928700299000 | T | T | T |
| 0.08347315710070 | 0.24804974985100 | 0.45338114841200 | T | T | T |
| 0.08343981419000 | 0.24809847778200 | 0.78683846087900 | T | T | T |
| 0.41648851785200 | 0.24824139224000 | 0.12014989024300 | T | T | T |
| 0.41676910494800 | 0.24812636910600 | 0.45349891686100 | T | T | T |
| 0.41676895572700 | 0.24813213574200 | 0.78680812136600 | T | T | T |
| 0.75011113879700 | 0.24818537008300 | 0.12013549015600 | T | T | T |
| 0.75011195725100 | 0.24813826227900 | 0.45349840195600 | T | T | T |
| 0.75010619287000 | 0.24813125791500 | 0.78682387742700 | T | T | T |
| 0.25005015387900 | 0.24499492511300 | 0.00749711219645 | T | T | T |
| 0.24986651339500 | 0.24481779114700 | 0.34084087742400 | T | T | T |
| 0.24988923530700 | 0.24494186895900 | 0.67440507293500 | T | T | T |
| 0.58320873780300 | 0.24497604800100 | 0.00774925239962 | T | T | T |
| 0.58322060159400 | 0.24497683832900 | 0.34113831788400 | T | T | T |
| 0.58321793209200 | 0.24495912081900 | 0.67441432524000 | T | T | T |
| 0.91629659630300 | 0.24494594183000 | 0.00770123181286 | T | T | T |



|                  |                  |                  |   |   |   |
|------------------|------------------|------------------|---|---|---|
| 0.91658065070400 | 0.24498128864900 | 0.34116343024500 | T | T | T |
| 0.91654867914100 | 0.24494889874200 | 0.67441710917200 | T | T | T |
| 0.24991360518400 | 0.24521140151500 | 0.22873713576200 | T | T | T |
| 0.25025699627400 | 0.24477494442700 | 0.56208524790400 | T | T | T |
| 0.25034395909700 | 0.24480288241600 | 0.89526812476700 | T | T | T |
| 0.58355423090700 | 0.24471969306800 | 0.22989009587500 | T | T | T |
| 0.58358398305700 | 0.24479243282600 | 0.56213187315400 | T | T | T |
| 0.58357842137600 | 0.24480226559400 | 0.89543656317700 | T | T | T |
| 0.91693678573500 | 0.24475250448800 | 0.22987400287800 | T | T | T |
| 0.91691964764600 | 0.24478600896200 | 0.56213106982400 | T | T | T |
| 0.91687823042600 | 0.24478902018400 | 0.89540146948400 | T | T | T |
| 0.24997078608800 | 0.24496446886400 | 0.11799529880700 | T | T | T |
| 0.25260234127300 | 0.24458594047400 | 0.45097670398200 | T | T | T |
| 0.25260086476700 | 0.24460478767200 | 0.78433457600100 | T | T | T |
| 0.58589128556700 | 0.24464200741300 | 0.11768020726700 | T | T | T |
| 0.58592415165700 | 0.24462581192100 | 0.45100509403200 | T | T | T |
| 0.58592971139300 | 0.24462591069800 | 0.78433235132300 | T | T | T |
| 0.91939809273700 | 0.24470692847000 | 0.11770135646300 | T | T | T |
| 0.91926218721000 | 0.24463415205500 | 0.45101182014600 | T | T | T |
| 0.91925698196400 | 0.24461613531200 | 0.78433734199600 | T | T | T |
| 0.12459135709200 | 0.99542485874400 | 0.03082862900600 | T | T | T |
| 0.12493053963300 | 0.99559062817700 | 0.36438128390200 | T | T | T |
| 0.12456417133900 | 0.99570205265900 | 0.69840703798800 | T | T | T |
| 0.45785505588400 | 0.99566132444500 | 0.03168923096830 | T | T | T |
| 0.45791161986200 | 0.99570400933400 | 0.36506107347200 | T | T | T |
| 0.45789274849500 | 0.99568984139500 | 0.69839460248200 | T | T | T |
| 0.79118776557400 | 0.99566759998000 | 0.03171745039850 | T | T | T |
| 0.79122839042900 | 0.99570632722600 | 0.36503824341700 | T | T | T |
| 0.79123670443200 | 0.99569833371700 | 0.69839378180700 | T | T | T |
| 0.12426202857500 | 0.99761810802300 | 0.25173223439500 | T | T | T |

|                  |                  |                  |   |   |   |
|------------------|------------------|------------------|---|---|---|
| 0.12419612260800 | 0.99861397861000 | 0.58406100189000 | T | T | T |
| 0.12416081137500 | 0.99814257397100 | 0.91715270945900 | T | T | T |
| 0.45758479412900 | 0.99867261136400 | 0.25066447713100 | T | T | T |
| 0.45754210092700 | 0.99863679680700 | 0.58406011815100 | T | T | T |
| 0.45751707224800 | 0.99858795882700 | 0.91736791913100 | T | T | T |
| 0.79087522476700 | 0.99864846455500 | 0.25066515770800 | T | T | T |
| 0.79087274219800 | 0.99861651113900 | 0.58404713739300 | T | T | T |
| 0.79088866497700 | 0.99863524275800 | 0.91737647251100 | T | T | T |
| 0.12573886885600 | 0.99572261033800 | 0.14163606766800 | T | T | T |
| 0.12574169791000 | 0.99536493535400 | 0.47529592131400 | T | T | T |
| 0.12579895755600 | 0.99534915083700 | 0.80865890283200 | T | T | T |
| 0.45894499292600 | 0.99540393928900 | 0.14184960831200 | T | T | T |
| 0.45915503914300 | 0.99536540126800 | 0.47527219023500 | T | T | T |
| 0.45911062885400 | 0.99535415229700 | 0.80859697588200 | T | T | T |
| 0.79252656913900 | 0.99539797335700 | 0.14187905034900 | T | T | T |
| 0.79247341600700 | 0.99537060556800 | 0.47525263533600 | T | T | T |
| 0.79248096823500 | 0.99538684280200 | 0.80858486547300 | T | T | T |
| 0.29187764304100 | 0.99566156915400 | 0.03049682757710 | T | T | T |
| 0.29194466324200 | 0.99579991731900 | 0.36396176421800 | T | T | T |
| 0.29196082250100 | 0.99579543177700 | 0.69728810238900 | T | T | T |
| 0.62529691754300 | 0.99578070206400 | 0.03058144866590 | T | T | T |
| 0.62531230415600 | 0.99580230501600 | 0.36392208075300 | T | T | T |
| 0.62530226099500 | 0.99578557157900 | 0.69727040845400 | T | T | T |
| 0.95805254452500 | 0.99552868836600 | 0.03088543697310 | T | T | T |
| 0.95859631055700 | 0.99578076225500 | 0.36394847972300 | T | T | T |
| 0.95863173150400 | 0.99578923985700 | 0.69728652727500 | T | T | T |
| 0.29088443297400 | 0.99554313750200 | 0.25299137353300 | T | T | T |
| 0.29080424481200 | 0.99523209929600 | 0.58644216752500 | T | T | T |
| 0.29075097233200 | 0.99522276523700 | 0.91978263242800 | T | T | T |
| 0.62416369318800 | 0.99524122546400 | 0.25306861596300 | T | T | T |

|                  |                  |                  |   |   |   |
|------------------|------------------|------------------|---|---|---|
| 0.62414450978500 | 0.99523589489300 | 0.58642703279200 | T | T | T |
| 0.62414287011200 | 0.99522475227800 | 0.91975192688100 | T | T | T |
| 0.95740054814200 | 0.99527536122600 | 0.25300078413100 | T | T | T |
| 0.95746213700100 | 0.99523816055300 | 0.58643922482700 | T | T | T |
| 0.95747581898700 | 0.99492627797800 | 0.91954565270200 | T | T | T |
| 0.29121589763500 | 0.99553115217900 | 0.14142078788800 | T | T | T |
| 0.29271088629100 | 0.99515774637300 | 0.47509030675800 | T | T | T |
| 0.29268398902800 | 0.99515976694800 | 0.80841871399900 | T | T | T |
| 0.62605216690800 | 0.99514094497000 | 0.14169017935000 | T | T | T |
| 0.62604236226100 | 0.99515266442100 | 0.47505310944700 | T | T | T |
| 0.62603792857600 | 0.99514021919400 | 0.80838475893100 | T | T | T |
| 0.95963714551100 | 0.99500102439200 | 0.14173139692800 | T | T | T |
| 0.95934848951500 | 0.99514728500200 | 0.47506874331500 | T | T | T |
| 0.95937315624300 | 0.99515263636300 | 0.80841401354500 | T | T | T |
| 0.12500000000200 | 0.13043999673400 | 0.02777666599470 | F | F | F |
| 0.12500000000200 | 0.13043999673400 | 0.36110999932900 | F | F | F |
| 0.12500000000200 | 0.13043999673400 | 0.69444333266100 | F | F | F |
| 0.45833333333400 | 0.13043999673400 | 0.02777666599470 | F | F | F |
| 0.45833333333400 | 0.13043999673400 | 0.36110999932900 | F | F | F |
| 0.45833333333400 | 0.13043999673400 | 0.69444333266100 | F | F | F |
| 0.79166666666800 | 0.13043999673400 | 0.02777666599470 | F | F | F |
| 0.79166666666800 | 0.13043999673400 | 0.36110999932900 | F | F | F |
| 0.79166666666800 | 0.13043999673400 | 0.69444333266100 | F | F | F |
| 0.12500000000200 | 0.13043999673400 | 0.24999999994900 | F | F | F |
| 0.12500000000200 | 0.13043999673400 | 0.58333333328300 | F | F | F |
| 0.12500000000200 | 0.13043999673400 | 0.91666666661700 | F | F | F |
| 0.45833333333400 | 0.13043999673400 | 0.24999999994900 | F | F | F |
| 0.45833333333400 | 0.13043999673400 | 0.58333333328300 | F | F | F |
| 0.45833333333400 | 0.13043999673400 | 0.91666666661700 | F | F | F |
| 0.79166666666800 | 0.13043999673400 | 0.24999999994900 | F | F | F |

|                  |                  |                  |   |   |   |
|------------------|------------------|------------------|---|---|---|
| 0.79166666666800 | 0.13043999673400 | 0.58333333328300 | F | F | F |
| 0.79166666666800 | 0.13043999673400 | 0.91666666661700 | F | F | F |
| 0.12500000000200 | 0.13043999673400 | 0.13888999819000 | F | F | F |
| 0.12500000000200 | 0.13043999673400 | 0.47222333152400 | F | F | F |
| 0.12500000000200 | 0.13043999673400 | 0.80555666485600 | F | F | F |
| 0.45833333333400 | 0.13043999673400 | 0.13888999819000 | F | F | F |
| 0.45833333333400 | 0.13043999673400 | 0.47222333152400 | F | F | F |
| 0.45833333333400 | 0.13043999673400 | 0.80555666485600 | F | F | F |
| 0.79166666666800 | 0.13043999673400 | 0.13888999819000 | F | F | F |
| 0.79166666666800 | 0.13043999673400 | 0.47222333152400 | F | F | F |
| 0.79166666666800 | 0.13043999673400 | 0.80555666485600 | F | F | F |
| 0.29166666669900 | 0.13043999673400 | 0.02777666599470 | F | F | F |
| 0.29166666669900 | 0.13043999673400 | 0.36110999932900 | F | F | F |
| 0.29166666669900 | 0.13043999673400 | 0.69444333266100 | F | F | F |
| 0.62500000003100 | 0.13043999673400 | 0.02777666599470 | F | F | F |
| 0.62500000003100 | 0.13043999673400 | 0.36110999932900 | F | F | F |
| 0.62500000003100 | 0.13043999673400 | 0.69444333266100 | F | F | F |
| 0.95833333336500 | 0.13043999673400 | 0.02777666599470 | F | F | F |
| 0.95833333336500 | 0.13043999673400 | 0.36110999932900 | F | F | F |
| 0.95833333336500 | 0.13043999673400 | 0.69444333266100 | F | F | F |
| 0.29166666669900 | 0.13043999673400 | 0.24999999949000 | F | F | F |
| 0.29166666669900 | 0.13043999673400 | 0.58333333328300 | F | F | F |
| 0.29166666669900 | 0.13043999673400 | 0.91666666661700 | F | F | F |
| 0.62500000003100 | 0.13043999673400 | 0.24999999949000 | F | F | F |
| 0.62500000003100 | 0.13043999673400 | 0.58333333328300 | F | F | F |
| 0.62500000003100 | 0.13043999673400 | 0.91666666661700 | F | F | F |
| 0.95833333336500 | 0.13043999673400 | 0.24999999949000 | F | F | F |
| 0.95833333336500 | 0.13043999673400 | 0.58333333328300 | F | F | F |
| 0.95833333336500 | 0.13043999673400 | 0.91666666661700 | F | F | F |
| 0.29166666669900 | 0.13043999673400 | 0.13888999819000 | F | F | F |

|                  |                  |                  |   |   |   |
|------------------|------------------|------------------|---|---|---|
| 0.29166666669900 | 0.13043999673400 | 0.47222333152400 | F | F | F |
| 0.29166666669900 | 0.13043999673400 | 0.80555666485600 | F | F | F |
| 0.62500000003100 | 0.13043999673400 | 0.13888999819000 | F | F | F |
| 0.62500000003100 | 0.13043999673400 | 0.47222333152400 | F | F | F |
| 0.62500000003100 | 0.13043999673400 | 0.80555666485600 | F | F | F |
| 0.95833333336500 | 0.13043999673400 | 0.13888999819000 | F | F | F |
| 0.95833333336500 | 0.13043999673400 | 0.47222333152400 | F | F | F |
| 0.95833333336500 | 0.13043999673400 | 0.80555666485600 | F | F | F |
| 0.12464864390400 | 0.26526484088200 | 0.03077628699510 | T | T | T |
| 0.12505743727300 | 0.26508664836900 | 0.36427766021600 | T | T | T |
| 0.12457353388700 | 0.26505364378200 | 0.69837118015000 | T | T | T |
| 0.45786788210600 | 0.26509898477800 | 0.03166949961150 | T | T | T |
| 0.45792087263500 | 0.26510243070200 | 0.36506975546800 | T | T | T |
| 0.45790065029100 | 0.26507015158800 | 0.69836542051000 | T | T | T |
| 0.79120398345700 | 0.26509442668900 | 0.03169187657270 | T | T | T |
| 0.79124403736100 | 0.26510201419800 | 0.36504284029800 | T | T | T |
| 0.79124444260100 | 0.26506273145900 | 0.69836794046400 | T | T | T |
| 0.12479670825300 | 0.26422490217300 | 0.25228961512900 | T | T | T |
| 0.12413835936600 | 0.26296415398200 | 0.58390811789600 | T | T | T |
| 0.12414364924600 | 0.26294880549500 | 0.91720879377500 | T | T | T |
| 0.45727842966200 | 0.26288836633100 | 0.25123816843500 | T | T | T |
| 0.45746938475100 | 0.26287116985000 | 0.58390282141800 | T | T | T |
| 0.45743354544100 | 0.26282230751700 | 0.91726338967000 | T | T | T |
| 0.79058580867500 | 0.26294021820800 | 0.25123639282100 | T | T | T |
| 0.79079445354500 | 0.26287896970900 | 0.58390880735900 | T | T | T |
| 0.79081328779900 | 0.26282272960100 | 0.91724788479300 | T | T | T |
| 0.12573579411800 | 0.26513095661200 | 0.14165894246500 | T | T | T |
| 0.12563384324600 | 0.26609255518700 | 0.47523213938900 | T | T | T |
| 0.12568450044500 | 0.26599621155300 | 0.80860556864900 | T | T | T |
| 0.45871452628800 | 0.26675063563000 | 0.14170448740600 | T | T | T |

|                  |                  |                  |   |   |   |
|------------------|------------------|------------------|---|---|---|
| 0.45904115462200 | 0.26611901445900 | 0.47518507765200 | T | T | T |
| 0.45897539005900 | 0.26632971344400 | 0.80846682253400 | T | T | T |
| 0.79232243274800 | 0.26673830359700 | 0.14171238877300 | T | T | T |
| 0.79235085906900 | 0.26616852203500 | 0.47514994607400 | T | T | T |
| 0.79236249266600 | 0.26615268543600 | 0.80850575169300 | T | T | T |
| 0.29185466967500 | 0.26507204965200 | 0.03045385822450 | T | T | T |
| 0.29191530876000 | 0.26489908696000 | 0.36390949201900 | T | T | T |
| 0.29194945963100 | 0.26496775932100 | 0.69730220107900 | T | T | T |
| 0.62528988019400 | 0.26498949302900 | 0.03059382107680 | T | T | T |
| 0.62532209013100 | 0.26498956293700 | 0.36395278815700 | T | T | T |
| 0.62529137406700 | 0.26498341233400 | 0.69728704647600 | T | T | T |
| 0.95805793854800 | 0.26526332562000 | 0.03090359227040 | T | T | T |
| 0.95861946054200 | 0.26500132637600 | 0.36397383854600 | T | T | T |
| 0.95862167961700 | 0.26497656398700 | 0.69730276573400 | T | T | T |
| 0.29095956564500 | 0.26516274138300 | 0.25303513900800 | T | T | T |
| 0.29085820426400 | 0.26551355488900 | 0.58655482725800 | T | T | T |
| 0.29078216624900 | 0.26548701058700 | 0.91987168307500 | T | T | T |
| 0.62450604932300 | 0.26560779188000 | 0.25359921537300 | T | T | T |
| 0.62420638712700 | 0.26551464548400 | 0.58655183769100 | T | T | T |
| 0.62419625587700 | 0.26552124232300 | 0.91985941844900 | T | T | T |
| 0.95790737211000 | 0.26554674766400 | 0.25351001188900 | T | T | T |
| 0.95752368483500 | 0.26550693740500 | 0.58656366814700 | T | T | T |
| 0.95752869187200 | 0.26545822273600 | 0.91986654565600 | T | T | T |
| 0.29120984922000 | 0.26522123192200 | 0.14145340746000 | T | T | T |
| 0.29273707570000 | 0.26563603646300 | 0.47510920114500 | T | T | T |
| 0.29271010064400 | 0.26563048286400 | 0.80844219240700 | T | T | T |
| 0.62605432298400 | 0.26562839582500 | 0.14171868873800 | T | T | T |
| 0.62606670812700 | 0.26563917641700 | 0.47507596438200 | T | T | T |
| 0.62606119670500 | 0.26564804620800 | 0.80840697929700 | T | T | T |
| 0.95965684376000 | 0.26577592845500 | 0.14177608110000 | T | T | T |

|                  |                  |                  |   |   |   |
|------------------|------------------|------------------|---|---|---|
| 0.95936999057400 | 0.26564566527700 | 0.47509176051600 | T | T | T |
| 0.95940046181200 | 0.26563815179600 | 0.80843587460400 | T | T | T |
| 0.04132108482150 | 0.99580034948000 | 0.03051118435680 | T | T | T |
| 0.04204156154320 | 0.99550943927800 | 0.36423662036200 | T | T | T |
| 0.04200783277950 | 0.99550355798300 | 0.69760704687100 | T | T | T |
| 0.37529204558100 | 0.99543309968700 | 0.03086237874350 | T | T | T |
| 0.37533283410100 | 0.99554709329800 | 0.36423282730900 | T | T | T |
| 0.37533283770900 | 0.99549570868000 | 0.69759704185400 | T | T | T |
| 0.70866532855900 | 0.99548349349900 | 0.03088602222070 | T | T | T |
| 0.70868047418800 | 0.99551078852500 | 0.36423060142500 | T | T | T |
| 0.70867793248400 | 0.99549603988900 | 0.69758459021400 | T | T | T |
| 0.04049716057990 | 0.99541487769600 | 0.25343966135300 | T | T | T |
| 0.04082663651840 | 0.99500576606100 | 0.58629183374600 | T | T | T |
| 0.04085028700020 | 0.99511158522700 | 0.91969783644200 | T | T | T |
| 0.37422823160800 | 0.99510073171700 | 0.25289595021400 | T | T | T |
| 0.37417091164200 | 0.99500710877200 | 0.58629333561800 | T | T | T |
| 0.37413719579000 | 0.99498566277100 | 0.91959911240800 | T | T | T |
| 0.70751508212000 | 0.99503250810300 | 0.25292544823600 | T | T | T |
| 0.70750633755400 | 0.99500915533300 | 0.58626808099900 | T | T | T |
| 0.70751323752300 | 0.99500424005300 | 0.91960259380900 | T | T | T |
| 0.04188767201730 | 0.99520770027900 | 0.14207181806900 | T | T | T |
| 0.04094633104460 | 0.99477166761800 | 0.47584346628000 | T | T | T |
| 0.04092568016390 | 0.99473848964400 | 0.80925875638300 | T | T | T |
| 0.37349056368500 | 0.99505032529700 | 0.14209024126400 | T | T | T |
| 0.37426898676800 | 0.99472399632400 | 0.47592025942000 | T | T | T |
| 0.37424019746000 | 0.99472455903800 | 0.80923478061400 | T | T | T |
| 0.70761382192400 | 0.99472863663000 | 0.14252727449100 | T | T | T |
| 0.70759445090200 | 0.99473579836500 | 0.47588546233600 | T | T | T |
| 0.70759732861700 | 0.99472090998100 | 0.80922145315500 | T | T | T |
| 0.20801881988100 | 0.99561539172400 | 0.03048498436650 | T | T | T |

|                  |                  |                  |   |   |   |
|------------------|------------------|------------------|---|---|---|
| 0.20808901593700 | 0.99566629464800 | 0.36391943708100 | T | T | T |
| 0.20838790584500 | 0.99542510102800 | 0.69780045659900 | T | T | T |
| 0.54171321679200 | 0.99538384004700 | 0.03107484806900 | T | T | T |
| 0.54173270959100 | 0.99542454805400 | 0.36442936085300 | T | T | T |
| 0.54172487599500 | 0.99539935301500 | 0.69778003650600 | T | T | T |
| 0.87496433589900 | 0.99541907096900 | 0.03103957570010 | T | T | T |
| 0.87503682159900 | 0.99542996774900 | 0.36441852574600 | T | T | T |
| 0.87506128214500 | 0.99541141137800 | 0.69778904384300 | T | T | T |
| 0.20745091219300 | 0.99813453737000 | 0.25142123288300 | T | T | T |
| 0.20710057987900 | 0.99746517337900 | 0.58375893997400 | T | T | T |
| 0.20706912696800 | 0.99758273236000 | 0.91709341220900 | T | T | T |
| 0.54045978121800 | 0.99748165287200 | 0.25038048855400 | T | T | T |
| 0.54043935153100 | 0.99745579675400 | 0.58374632523700 | T | T | T |
| 0.54043371993600 | 0.99745186728200 | 0.91706578596400 | T | T | T |
| 0.87374544269100 | 0.99753184837100 | 0.25036233058700 | T | T | T |
| 0.87376342437400 | 0.99748480662100 | 0.58375646678700 | T | T | T |
| 0.87379258886500 | 0.99741239832500 | 0.91706076059700 | T | T | T |
| 0.20862654413700 | 0.99542978803200 | 0.14135702521000 | T | T | T |
| 0.20750320343400 | 0.00340468906205 | 0.47025261070900 | T | T | T |
| 0.20749494294800 | 0.00339778686723 | 0.80363877732100 | T | T | T |
| 0.54082953909100 | 0.00338693284984 | 0.13686935550500 | T | T | T |
| 0.54084308189900 | 0.00338267986929 | 0.47024853662200 | T | T | T |
| 0.54083270585100 | 0.00338780766753 | 0.80357585380500 | T | T | T |
| 0.87435628404400 | 0.00330419118998 | 0.13689875937700 | T | T | T |
| 0.87413898676300 | 0.00340346720028 | 0.47023048251600 | T | T | T |
| 0.87418035906600 | 0.00336761577856 | 0.80360195532700 | T | T | T |
| 0.00006076023421 | 0.06670059156690 | 0.08268891029990 | T | T | T |
| 0.00060175026982 | 0.06671385613300 | 0.41585399861200 | T | T | T |
| 0.00062251257276 | 0.06671834583070 | 0.74920158817300 | T | T | T |
| 0.33378291950700 | 0.06666922689690 | 0.08244112053040 | T | T | T |



|                  |                  |                  |   |   |   |
|------------------|------------------|------------------|---|---|---|
| 0.33395779525200 | 0.06671264968220 | 0.41587682889600 | T | T | T |
| 0.33393397058800 | 0.06672209160090 | 0.74919754189000 | T | T | T |
| 0.66728978369500 | 0.06670793490000 | 0.08250818429240 | T | T | T |
| 0.66729135502500 | 0.06671192144590 | 0.41584877289100 | T | T | T |
| 0.66728745012300 | 0.06671499270110 | 0.74918743536800 | T | T | T |
| 0.33352212941100 | 0.06634501980650 | 0.30498745847500 | T | T | T |
| 0.33353754633000 | 0.06629172444640 | 0.63834438117300 | T | T | T |
| 0.33347849196500 | 0.06629747021340 | 0.97165249570100 | T | T | T |
| 0.66688125466000 | 0.06627948037010 | 0.30500412512600 | T | T | T |
| 0.66688267050700 | 0.06628425302470 | 0.63833941593100 | T | T | T |
| 0.66688686355000 | 0.06628222984560 | 0.97166459838400 | T | T | T |
| 0.99995134435000 | 0.06635186976020 | 0.30517836135500 | T | T | T |
| 0.00021154427728 | 0.06628883853810 | 0.63835011519500 | T | T | T |
| 0.99980914337400 | 0.06632488795690 | 0.97153994906000 | T | T | T |
| 0.99982390910800 | 0.06623303214040 | 0.19401666367200 | T | T | T |
| 0.99984943002200 | 0.06635279166810 | 0.52741177440600 | T | T | T |
| 0.99987272123900 | 0.06638675238950 | 0.86074618617900 | T | T | T |
| 0.33316670414300 | 0.06633325638160 | 0.19399604350000 | T | T | T |
| 0.33319095771100 | 0.06635953705130 | 0.52742250267300 | T | T | T |
| 0.33315066648900 | 0.06635598651490 | 0.86075339594800 | T | T | T |
| 0.66653878758200 | 0.06634561475530 | 0.19405996596300 | T | T | T |
| 0.66652536475200 | 0.06635394172620 | 0.52740963550000 | T | T | T |
| 0.66652812095400 | 0.06634486069860 | 0.86074208825800 | T | T | T |
| 0.16664890328800 | 0.06666551548960 | 0.08263637073800 | T | T | T |
| 0.16699594163300 | 0.06304174787940 | 0.41898619343800 | T | T | T |
| 0.16719408009800 | 0.06302587545790 | 0.75256351851900 | T | T | T |
| 0.50049628180900 | 0.06301473105210 | 0.08584616778590 | T | T | T |
| 0.50054668083800 | 0.06302421094370 | 0.41922143337200 | T | T | T |
| 0.50053019434000 | 0.06301807118940 | 0.75255069743900 | T | T | T |
| 0.83384982523200 | 0.06301185610310 | 0.08587467026860 | T | T | T |

|                  |                  |                  |   |   |   |
|------------------|------------------|------------------|---|---|---|
| 0.83385446928100 | 0.06303250484620 | 0.41920949346200 | T | T | T |
| 0.83387279795000 | 0.06301799545910 | 0.75255997372300 | T | T | T |
| 0.16629510441000 | 0.06629626011200 | 0.30490252860900 | T | T | T |
| 0.16645574711300 | 0.06545431106630 | 0.63885778259600 | T | T | T |
| 0.16618001399500 | 0.06603553286780 | 0.97155008863400 | T | T | T |
| 0.49980148149700 | 0.06544804565490 | 0.30549925542500 | T | T | T |
| 0.49979503401700 | 0.06544793137620 | 0.63885117001700 | T | T | T |
| 0.49977896514800 | 0.06543473221730 | 0.97216401262900 | T | T | T |
| 0.83310039916700 | 0.06544318431590 | 0.30548913399700 | T | T | T |
| 0.83312824366900 | 0.06544727831240 | 0.63884979900400 | T | T | T |
| 0.83313257134500 | 0.06545245413840 | 0.97217070302100 | T | T | T |
| 0.16658596386400 | 0.06767472338160 | 0.19365527768800 | T | T | T |
| 0.16619868849900 | 0.06891380598310 | 0.52598077623100 | T | T | T |
| 0.16618659323200 | 0.06894929178570 | 0.85931762265600 | T | T | T |
| 0.49953974780600 | 0.06892790663960 | 0.19259433491400 | T | T | T |
| 0.49954286399400 | 0.06890094059360 | 0.52597656910000 | T | T | T |
| 0.49952433543500 | 0.06889220551770 | 0.85930325333400 | T | T | T |
| 0.83288040229500 | 0.06890672953210 | 0.19259880156700 | T | T | T |
| 0.83286206924100 | 0.06890089083150 | 0.52597158876700 | T | T | T |
| 0.83288491748000 | 0.06890657192390 | 0.85930866610800 | T | T | T |
| 0.08334215675930 | 0.06612184750590 | 0.08298411919080 | T | T | T |
| 0.08441096361190 | 0.06507197120390 | 0.41705940999500 | T | T | T |
| 0.08419755698320 | 0.06508709050050 | 0.75062823296900 | T | T | T |
| 0.41744234373300 | 0.06506031303600 | 0.08391368203790 | T | T | T |
| 0.41752309866800 | 0.06508720935220 | 0.41728658012900 | T | T | T |
| 0.41750002171500 | 0.06508981106170 | 0.75061116405700 | T | T | T |
| 0.75083144140200 | 0.06507467058620 | 0.08393320827260 | T | T | T |
| 0.75083920175500 | 0.06508318957430 | 0.41727257858200 | T | T | T |
| 0.75085816545600 | 0.06508775462750 | 0.75060869206100 | T | T | T |
| 0.08345611119580 | 0.06648621036900 | 0.30485582574500 | T | T | T |

|                  |                  |                  |   |   |   |
|------------------|------------------|------------------|---|---|---|
| 0.08317176151660 | 0.06623348125290 | 0.63810557353700 | T | T | T |
| 0.08331363535380 | 0.06633523468210 | 0.97128710677600 | T | T | T |
| 0.41655080269300 | 0.06624157167300 | 0.30476959813600 | T | T | T |
| 0.41650190416200 | 0.06623378555010 | 0.63810624065600 | T | T | T |
| 0.41647861699000 | 0.06622510899490 | 0.97141251389300 | T | T | T |
| 0.74985833085400 | 0.06622914148410 | 0.30475782721900 | T | T | T |
| 0.74984225322400 | 0.06622761133760 | 0.63810014576500 | T | T | T |
| 0.74985452372800 | 0.06623204453200 | 0.97142586378300 | T | T | T |
| 0.08313028473400 | 0.06623271605320 | 0.19374563802900 | T | T | T |
| 0.08353859979320 | 0.06722034908820 | 0.52664928491700 | T | T | T |
| 0.08354442339190 | 0.06725953584340 | 0.85997515790100 | T | T | T |
| 0.41685040716100 | 0.06719203672810 | 0.19323915740500 | T | T | T |
| 0.41688287998400 | 0.06721677045570 | 0.52664878573700 | T | T | T |
| 0.41685232568200 | 0.06721633610010 | 0.85997388001300 | T | T | T |
| 0.75022440874100 | 0.06721952665720 | 0.19328962339800 | T | T | T |
| 0.75020970363100 | 0.06722013029710 | 0.52663718569100 | T | T | T |
| 0.75022172865600 | 0.06721342418310 | 0.85997254812800 | T | T | T |
| 0.25005886181900 | 0.06673362349870 | 0.08235907169260 | T | T | T |
| 0.24976257064800 | 0.06683310160420 | 0.41557545019400 | T | T | T |
| 0.24979255325200 | 0.06688418985410 | 0.74895342778300 | T | T | T |
| 0.58313306377800 | 0.06685802319530 | 0.08226229382740 | T | T | T |
| 0.58315147000500 | 0.06686969117080 | 0.41560508241900 | T | T | T |
| 0.58314026783900 | 0.06687176650800 | 0.74894251322900 | T | T | T |
| 0.91635626255000 | 0.06684671229830 | 0.08233282547990 | T | T | T |
| 0.91645871927500 | 0.06686945461940 | 0.41560997171300 | T | T | T |
| 0.91647912713300 | 0.06687757076780 | 0.74895128900600 | T | T | T |
| 0.24998337601200 | 0.06638898593730 | 0.30497717398300 | T | T | T |
| 0.24997279796400 | 0.06609060031330 | 0.63825157227700 | T | T | T |
| 0.24987789898000 | 0.06616997418570 | 0.97154311662800 | T | T | T |
| 0.58332203345300 | 0.06607702054360 | 0.30490340660100 | T | T | T |

|                  |                  |                  |   |   |   |
|------------------|------------------|------------------|---|---|---|
| 0.58330723191100 | 0.06608536574720 | 0.63824822919400 | T | T | T |
| 0.58330581854600 | 0.06607793699710 | 0.97157020324100 | T | T | T |
| 0.91659714839400 | 0.06607541405920 | 0.30489905313600 | T | T | T |
| 0.91663913113000 | 0.06608860974750 | 0.63825282008600 | T | T | T |
| 0.91678713357000 | 0.06610067557660 | 0.97141735234500 | T | T | T |
| 0.24992043154800 | 0.06683794777980 | 0.19326557129300 | T | T | T |
| 0.25000290624500 | 0.06706391000290 | 0.52675719317400 | T | T | T |
| 0.24998055435100 | 0.06708090479440 | 0.86008199778500 | T | T | T |
| 0.58334912180200 | 0.06703952395980 | 0.19339394647800 | T | T | T |
| 0.58334090336400 | 0.06704384221030 | 0.52674765298900 | T | T | T |
| 0.58333504464500 | 0.06704003355090 | 0.86007709443000 | T | T | T |
| 0.91666430574300 | 0.06701182297180 | 0.19336471795400 | T | T | T |
| 0.91665857452100 | 0.06704581581600 | 0.52675023566200 | T | T | T |
| 0.91667927859100 | 0.06708707357900 | 0.86006943554400 | T | T | T |
| 0.04166666667330 | 0.13043999673400 | 0.02777666599470 | F | F | F |
| 0.04166666667330 | 0.13043999673400 | 0.36110999932900 | F | F | F |
| 0.04166666667330 | 0.13043999673400 | 0.69444333266100 | F | F | F |
| 0.37500000000700 | 0.13043999673400 | 0.02777666599470 | F | F | F |
| 0.37500000000700 | 0.13043999673400 | 0.36110999932900 | F | F | F |
| 0.37500000000700 | 0.13043999673400 | 0.69444333266100 | F | F | F |
| 0.70833333334100 | 0.13043999673400 | 0.02777666599470 | F | F | F |
| 0.70833333334100 | 0.13043999673400 | 0.36110999932900 | F | F | F |
| 0.70833333334100 | 0.13043999673400 | 0.69444333266100 | F | F | F |
| 0.04166666667330 | 0.13043999673400 | 0.24999999994900 | F | F | F |
| 0.04166666667330 | 0.13043999673400 | 0.58333333328300 | F | F | F |
| 0.04166666667330 | 0.13043999673400 | 0.91666666617000 | F | F | F |
| 0.37500000000700 | 0.13043999673400 | 0.24999999994900 | F | F | F |
| 0.37500000000700 | 0.13043999673400 | 0.58333333328300 | F | F | F |
| 0.37500000000700 | 0.13043999673400 | 0.91666666617000 | F | F | F |
| 0.70833333334100 | 0.13043999673400 | 0.24999999994900 | F | F | F |

|                  |                  |                  |   |   |   |
|------------------|------------------|------------------|---|---|---|
| 0.70833333334100 | 0.13043999673400 | 0.58333333328300 | F | F | F |
| 0.70833333334100 | 0.13043999673400 | 0.91666666661700 | F | F | F |
| 0.04166666667330 | 0.13043999673400 | 0.13888999819000 | F | F | F |
| 0.04166666667330 | 0.13043999673400 | 0.47222333152400 | F | F | F |
| 0.04166666667330 | 0.13043999673400 | 0.80555666485600 | F | F | F |
| 0.3750000000700  | 0.13043999673400 | 0.13888999819000 | F | F | F |
| 0.3750000000700  | 0.13043999673400 | 0.47222333152400 | F | F | F |
| 0.3750000000700  | 0.13043999673400 | 0.80555666485600 | F | F | F |
| 0.70833333334100 | 0.13043999673400 | 0.13888999819000 | F | F | F |
| 0.70833333334100 | 0.13043999673400 | 0.47222333152400 | F | F | F |
| 0.70833333334100 | 0.13043999673400 | 0.80555666485600 | F | F | F |
| 0.2083333332800  | 0.13043999673400 | 0.02777666599470 | F | F | F |
| 0.2083333332800  | 0.13043999673400 | 0.36110999932900 | F | F | F |
| 0.2083333332800  | 0.13043999673400 | 0.69444333266100 | F | F | F |
| 0.5416666666100  | 0.13043999673400 | 0.02777666599470 | F | F | F |
| 0.5416666666100  | 0.13043999673400 | 0.36110999932900 | F | F | F |
| 0.5416666666100  | 0.13043999673400 | 0.69444333266100 | F | F | F |
| 0.8749999999500  | 0.13043999673400 | 0.02777666599470 | F | F | F |
| 0.8749999999500  | 0.13043999673400 | 0.36110999932900 | F | F | F |
| 0.8749999999500  | 0.13043999673400 | 0.69444333266100 | F | F | F |
| 0.2083333332800  | 0.13043999673400 | 0.2499999994900  | F | F | F |
| 0.2083333332800  | 0.13043999673400 | 0.58333333328300 | F | F | F |
| 0.2083333332800  | 0.13043999673400 | 0.91666666661700 | F | F | F |
| 0.5416666666100  | 0.13043999673400 | 0.2499999994900  | F | F | F |
| 0.5416666666100  | 0.13043999673400 | 0.58333333328300 | F | F | F |
| 0.5416666666100  | 0.13043999673400 | 0.91666666661700 | F | F | F |
| 0.8749999999500  | 0.13043999673400 | 0.2499999994900  | F | F | F |
| 0.8749999999500  | 0.13043999673400 | 0.58333333328300 | F | F | F |
| 0.8749999999500  | 0.13043999673400 | 0.91666666661700 | F | F | F |
| 0.2083333332800  | 0.13043999673400 | 0.13888999819000 | F | F | F |

|                  |                  |                  |   |   |   |
|------------------|------------------|------------------|---|---|---|
| 0.2083333332800  | 0.13043999673400 | 0.47222333152400 | F | F | F |
| 0.2083333332800  | 0.13043999673400 | 0.80555666485600 | F | F | F |
| 0.5416666666100  | 0.13043999673400 | 0.13888999819000 | F | F | F |
| 0.5416666666100  | 0.13043999673400 | 0.47222333152400 | F | F | F |
| 0.5416666666100  | 0.13043999673400 | 0.80555666485600 | F | F | F |
| 0.8749999999500  | 0.13043999673400 | 0.13888999819000 | F | F | F |
| 0.8749999999500  | 0.13043999673400 | 0.47222333152400 | F | F | F |
| 0.8749999999500  | 0.13043999673400 | 0.80555666485600 | F | F | F |
| 0.00006348780891 | 0.19417150899000 | 0.08268416691540 | T | T | T |
| 0.00060330571335 | 0.19413897059500 | 0.41584056432300 | T | T | T |
| 0.00062353424762 | 0.19413312009200 | 0.74918725094000 | T | T | T |
| 0.33377180453800 | 0.19418837524800 | 0.08242822270460 | T | T | T |
| 0.33395768051300 | 0.19414256800800 | 0.41586314626300 | T | T | T |
| 0.33393551038800 | 0.19413148580400 | 0.74918421588100 | T | T | T |
| 0.66729694349900 | 0.19413744576200 | 0.08248863134780 | T | T | T |
| 0.66729304224800 | 0.19413632971900 | 0.41583505616800 | T | T | T |
| 0.66728961479500 | 0.19413738416800 | 0.74917341061300 | T | T | T |
| 0.33354009076900 | 0.19447393939000 | 0.30499152610300 | T | T | T |
| 0.33354214988000 | 0.19451572567700 | 0.63836137052800 | T | T | T |
| 0.33349402952600 | 0.19450346726900 | 0.97167407669200 | T | T | T |
| 0.66696117125100 | 0.19448515607800 | 0.30506590256400 | T | T | T |
| 0.66688343429700 | 0.19452043392700 | 0.63836045663900 | T | T | T |
| 0.66688610771500 | 0.19452612593700 | 0.97167951639500 | T | T | T |
| 0.00011056125242 | 0.19442422117500 | 0.30520804459600 | T | T | T |
| 0.00021693293663 | 0.19451608737300 | 0.63836833792000 | T | T | T |
| 0.00004230978401 | 0.19449426672800 | 0.97167710337400 | T | T | T |
| 0.99983785841300 | 0.19458168539800 | 0.19401808015400 | T | T | T |
| 0.99985147153300 | 0.19448733455500 | 0.52740511263600 | T | T | T |
| 0.99987431606600 | 0.19447903520900 | 0.86074660591000 | T | T | T |
| 0.33318057016800 | 0.19447516659600 | 0.19397498193500 | T | T | T |

|                  |                  |                  |   |   |   |
|------------------|------------------|------------------|---|---|---|
| 0.33319201261500 | 0.19448016468200 | 0.52741326068700 | T | T | T |
| 0.33315349985000 | 0.19448283655900 | 0.86074585822900 | T | T | T |
| 0.66652933707800 | 0.19449210832200 | 0.19405048192500 | T | T | T |
| 0.66652770817600 | 0.19448686084900 | 0.52740249619700 | T | T | T |
| 0.66653267491100 | 0.19449043535500 | 0.86073203795300 | T | T | T |
| 0.16664966000200 | 0.19420706404700 | 0.08264572435730 | T | T | T |
| 0.16700249536600 | 0.19785354683800 | 0.41901501603900 | T | T | T |
| 0.16719951409100 | 0.19786688445100 | 0.75259081038200 | T | T | T |
| 0.50048485166600 | 0.19789189264500 | 0.08588979277100 | T | T | T |
| 0.50055402960300 | 0.19788789947200 | 0.41926365708300 | T | T | T |
| 0.50053101832000 | 0.19788099303500 | 0.75258475938400 | T | T | T |
| 0.83384027421200 | 0.19789254731100 | 0.08592037660420 | T | T | T |
| 0.83386102329300 | 0.19788057788200 | 0.41924899313100 | T | T | T |
| 0.83387721616200 | 0.19787663646000 | 0.75259133887100 | T | T | T |
| 0.16664718292900 | 0.19455552214800 | 0.30465911774400 | T | T | T |
| 0.16629735389700 | 0.19536880519200 | 0.63863849899500 | T | T | T |
| 0.16638485043100 | 0.19478718950300 | 0.97136022306100 | T | T | T |
| 0.49979821935800 | 0.19532923723900 | 0.30553710903700 | T | T | T |
| 0.49965320097300 | 0.19537812770900 | 0.63865458318900 | T | T | T |
| 0.49967462392400 | 0.19539483819200 | 0.97200196832100 | T | T | T |
| 0.83310458256900 | 0.19533707706900 | 0.30552174297000 | T | T | T |
| 0.83299000825700 | 0.19537717034200 | 0.63865801309600 | T | T | T |
| 0.83301909420700 | 0.19537930294800 | 0.97199660924800 | T | T | T |
| 0.16661885970700 | 0.19458172846700 | 0.19410684225700 | T | T | T |
| 0.16624320481800 | 0.19256677746900 | 0.52597642760300 | T | T | T |
| 0.16623599635900 | 0.19247805836800 | 0.85929076752100 | T | T | T |
| 0.49957197104300 | 0.19331107504200 | 0.19300548175900 | T | T | T |
| 0.49958694560200 | 0.19258645347600 | 0.52597032506500 | T | T | T |
| 0.49955673764100 | 0.19264237992200 | 0.85929685453000 | T | T | T |
| 0.83292740987400 | 0.19334898393400 | 0.19301812886800 | T | T | T |

|                  |                  |                  |   |   |   |
|------------------|------------------|------------------|---|---|---|
| 0.83290106497600 | 0.19260598496000 | 0.52596911861000 | T | T | T |
| 0.83292910057200 | 0.19261086977100 | 0.85931073797600 | T | T | T |
| 0.08333111912270 | 0.19471528876300 | 0.08297933544530 | T | T | T |
| 0.08441788247900 | 0.19577350610700 | 0.41703977806900 | T | T | T |
| 0.08419823222240 | 0.19573618657100 | 0.75060102917400 | T | T | T |
| 0.41745296765300 | 0.19573679637000 | 0.08388076331900 | T | T | T |
| 0.41752565316600 | 0.19573872937100 | 0.41726322614500 | T | T | T |
| 0.41751023964800 | 0.19572726641100 | 0.75058612315200 | T | T | T |
| 0.75084661315400 | 0.19573439450900 | 0.08390393810020 | T | T | T |
| 0.75084546505000 | 0.19573988528600 | 0.41724568520200 | T | T | T |
| 0.75086348929900 | 0.19573375821800 | 0.75058566150900 | T | T | T |
| 0.08352850031800 | 0.19437147514000 | 0.30479067682700 | T | T | T |
| 0.08333962842350 | 0.19459544697400 | 0.63794271923700 | T | T | T |
| 0.08331520057180 | 0.19450829710900 | 0.97124910331000 | T | T | T |
| 0.41649501475600 | 0.19456158721100 | 0.30479760065000 | T | T | T |
| 0.41665376457800 | 0.19459679645100 | 0.63795868169400 | T | T | T |
| 0.41659825769500 | 0.19460329916200 | 0.97130099766400 | T | T | T |
| 0.74981781885500 | 0.19457710481800 | 0.30478577399100 | T | T | T |
| 0.74999125405600 | 0.19460122931300 | 0.63795994422900 | T | T | T |
| 0.74998927228600 | 0.19460324507400 | 0.97129695284200 | T | T | T |
| 0.08333095618860 | 0.19463586647100 | 0.19378354278700 | T | T | T |
| 0.08357662682670 | 0.19368800002000 | 0.52661105802200 | T | T | T |
| 0.08358176514430 | 0.19366201127100 | 0.85994783348500 | T | T | T |
| 0.41694258857500 | 0.19384578202300 | 0.19319382056700 | T | T | T |
| 0.41691871642600 | 0.19368794374200 | 0.52659940273300 | T | T | T |
| 0.41689636136300 | 0.19371978628000 | 0.85991869698800 | T | T | T |
| 0.75032159219700 | 0.19382511365300 | 0.19324809903200 | T | T | T |
| 0.75025065393600 | 0.19369971779700 | 0.52658685987300 | T | T | T |
| 0.75026268645900 | 0.19369606174100 | 0.85992197336900 | T | T | T |
| 0.25006172139900 | 0.19414265965500 | 0.08235919064140 | T | T | T |



|                  |                  |                  |   |   |   |
|------------------|------------------|------------------|---|---|---|
| 0.24975086522800 | 0.19402566723600 | 0.41557850980700 | T | T | T |
| 0.24977656514800 | 0.19398449381700 | 0.74895595703200 | T | T | T |
| 0.58312382884500 | 0.19399576909500 | 0.08225878478620 | T | T | T |
| 0.58313654950200 | 0.19398923135700 | 0.41560597820800 | T | T | T |
| 0.58312367063000 | 0.19398684973800 | 0.74894121284300 | T | T | T |
| 0.91635073875100 | 0.19401176121800 | 0.08233083510020 | T | T | T |
| 0.91644494694500 | 0.19399206153200 | 0.41561110273700 | T | T | T |
| 0.91646359393900 | 0.19398286524900 | 0.74895264524600 | T | T | T |
| 0.24972348175900 | 0.19444589645800 | 0.30473204845400 | T | T | T |
| 0.24993863561300 | 0.19473301132600 | 0.63822218809200 | T | T | T |
| 0.24969851056800 | 0.19466130792800 | 0.97138166706200 | T | T | T |
| 0.58333139560200 | 0.19469622149400 | 0.30496574040800 | T | T | T |
| 0.58327890506100 | 0.19473766349500 | 0.63822106541600 | T | T | T |
| 0.58327753787000 | 0.19474500659900 | 0.97154083589000 | T | T | T |
| 0.91662877482400 | 0.19470106963500 | 0.30495438032200 | T | T | T |
| 0.91660905965800 | 0.19473491160300 | 0.63822641759800 | T | T | T |
| 0.91661891714800 | 0.19473011293500 | 0.97154747841000 | T | T | T |
| 0.24990045133700 | 0.19408304632400 | 0.19331721107100 | T | T | T |
| 0.24994495865600 | 0.19407673204500 | 0.52680390905600 | T | T | T |
| 0.24992334553100 | 0.19400620884200 | 0.86008985094900 | T | T | T |
| 0.58327632623900 | 0.19462355485900 | 0.19387242619800 | T | T | T |
| 0.58328779226200 | 0.19410681884300 | 0.52680661336200 | T | T | T |
| 0.58328041815400 | 0.19409606059900 | 0.86012617064500 | T | T | T |
| 0.91661516238700 | 0.19461620236100 | 0.19383588445900 | T | T | T |
| 0.91660501810700 | 0.19410582545300 | 0.52681048910500 | T | T | T |
| 0.91662890502700 | 0.19407666152200 | 0.86012231220500 | T | T | T |
| 0.04136348021850 | 0.26502042494900 | 0.03055420892600 | T | T | T |
| 0.04209339628970 | 0.26528624078400 | 0.36425678907900 | T | T | T |
| 0.04204070723550 | 0.26523326988300 | 0.69757589859600 | T | T | T |
| 0.37531740477000 | 0.26532566593600 | 0.03084695483900 | T | T | T |

|                  |                  |                  |   |   |   |
|------------------|------------------|------------------|---|---|---|
| 0.37533953938400 | 0.26525184419500 | 0.36425988171000 | T | T | T |
| 0.37536457278300 | 0.26524065285800 | 0.69757228528900 | T | T | T |
| 0.70869771181800 | 0.26525991329000 | 0.03086229948650 | T | T | T |
| 0.70868960433500 | 0.26529665485500 | 0.36425878597600 | T | T | T |
| 0.70870809497200 | 0.26524555917700 | 0.69755907566600 | T | T | T |
| 0.04107049070180 | 0.26512841046600 | 0.25318605053900 | T | T | T |
| 0.04082998537830 | 0.26572776605700 | 0.58631732234900 | T | T | T |
| 0.04086042661030 | 0.26572597137900 | 0.91968412111100 | T | T | T |
| 0.37422458458400 | 0.26568382387800 | 0.25290650495700 | T | T | T |
| 0.37417484953100 | 0.26572216771900 | 0.58631495947200 | T | T | T |
| 0.37413337501400 | 0.26574662257200 | 0.91963268329000 | T | T | T |
| 0.70752832463500 | 0.26576753211400 | 0.25294844687200 | T | T | T |
| 0.70750922456400 | 0.26571731075700 | 0.58629782759000 | T | T | T |
| 0.70751600534400 | 0.26573337431700 | 0.91962148193000 | T | T | T |
| 0.04189556366060 | 0.26555524733000 | 0.14212246815500 | T | T | T |
| 0.04094742352100 | 0.26601257630700 | 0.47584363528100 | T | T | T |
| 0.04093119605350 | 0.26604556474300 | 0.80924985258800 | T | T | T |
| 0.37349620278000 | 0.26571732747100 | 0.14207126151400 | T | T | T |
| 0.37427637583100 | 0.26605510234200 | 0.47591169215400 | T | T | T |
| 0.37424456549000 | 0.26605005689400 | 0.80922782523100 | T | T | T |
| 0.70761444629500 | 0.26603859418300 | 0.14250636463700 | T | T | T |
| 0.70760060952400 | 0.26604182208800 | 0.47587697661900 | T | T | T |
| 0.70760392539200 | 0.26605355610900 | 0.80921439561700 | T | T | T |
| 0.20802955706400 | 0.26512074444700 | 0.03046727142080 | T | T | T |
| 0.20817007326100 | 0.26512394403900 | 0.36391744096000 | T | T | T |
| 0.20833272801200 | 0.26528781013200 | 0.69774093142100 | T | T | T |
| 0.54167102843300 | 0.26534094555100 | 0.03103999052230 | T | T | T |
| 0.54173050971500 | 0.26539279295100 | 0.36445623104000 | T | T | T |
| 0.54167557338100 | 0.26532147996000 | 0.69773162306000 | T | T | T |
| 0.87489928985300 | 0.26535809495600 | 0.03105169188250 | T | T | T |

|                  |                  |                  |   |   |   |
|------------------|------------------|------------------|---|---|---|
| 0.87503446373600 | 0.26538044164500 | 0.36444593586300 | T | T | T |
| 0.87501284242100 | 0.26531143612600 | 0.69774380686100 | T | T | T |
| 0.20779500646900 | 0.26474419768400 | 0.25143464872600 | T | T | T |
| 0.20716073525700 | 0.26437689401700 | 0.58389401625000 | T | T | T |
| 0.20713678811400 | 0.26456724313200 | 0.91697514072300 | T | T | T |
| 0.54055655666700 | 0.26479039019900 | 0.25145513064000 | T | T | T |
| 0.54049530369300 | 0.26438867541300 | 0.58390995969700 | T | T | T |
| 0.54049840567100 | 0.26442605771600 | 0.91723777375600 | T | T | T |
| 0.87390837563000 | 0.26479332093200 | 0.25144981570300 | T | T | T |
| 0.87382229759400 | 0.26438518590100 | 0.58392171790800 | T | T | T |
| 0.87386297754700 | 0.26443759708400 | 0.91725383961600 | T | T | T |
| 0.20862474617200 | 0.26551596508200 | 0.14138816105200 | T | T | T |
| 0.20754925873700 | 0.25834518930300 | 0.46993804581800 | T | T | T |
| 0.20754858064700 | 0.25838792036200 | 0.80332468874400 | T | T | T |
| 0.54086431724500 | 0.25829939381500 | 0.13659450879000 | T | T | T |
| 0.54089580533100 | 0.25838005669700 | 0.46994463960500 | T | T | T |
| 0.54088807000800 | 0.25837895442200 | 0.80327394949800 | T | T | T |
| 0.87442730413400 | 0.25840035631900 | 0.13662249335500 | T | T | T |
| 0.87419301586900 | 0.25834924294300 | 0.46993019178500 | T | T | T |
| 0.87423600486100 | 0.25840629091200 | 0.80329304601900 | T | T | T |
| 0.19303530453600 | 0.38240842415000 | 0.22717842855200 | T | T | T |
| 0.19029403832700 | 0.37764261633400 | 0.55972942479000 | T | T | T |
| 0.19035780339600 | 0.37770158398200 | 0.89301918143200 | T | T | T |
| 0.52354840314100 | 0.37750588562800 | 0.22660773165400 | T | T | T |
| 0.52363535174700 | 0.37759096916400 | 0.55995954027500 | T | T | T |
| 0.52367115409100 | 0.37754251653900 | 0.89332810416200 | T | T | T |
| 0.85700400402000 | 0.37756286999000 | 0.22671041562500 | T | T | T |
| 0.85703310706400 | 0.37762117724400 | 0.55995772972200 | T | T | T |
| 0.85688092002800 | 0.37754618608600 | 0.89333727416500 | T | T | T |
| 0.21273519260900 | 0.37925987836500 | 0.16648831584100 | T | T | T |

|                  |                  |                  |   |   |   |
|------------------|------------------|------------------|---|---|---|
| 0.21701480623700 | 0.29079567079500 | 0.48918371031700 | T | T | T |
| 0.21707469011800 | 0.29078798337700 | 0.82256869226000 | T | T | T |
| 0.55033354860200 | 0.29087115346200 | 0.15572215175200 | T | T | T |
| 0.55044286804100 | 0.29079343479300 | 0.48915805460300 | T | T | T |
| 0.55040372434100 | 0.29082079113800 | 0.82248287112800 | T | T | T |
| 0.88390653477700 | 0.29086100612400 | 0.15582657239500 | T | T | T |
| 0.88367802165300 | 0.29083652467900 | 0.48912607460600 | T | T | T |
| 0.88377367342000 | 0.29080394546700 | 0.82252186040700 | T | T | T |
| 0.22614916385200 | 0.34071511233900 | 0.24666129219200 | T | T | T |
| 0.22376624819200 | 0.33793800378600 | 0.57379880051600 | T | T | T |
| 0.22402967219000 | 0.33835458682500 | 0.90711217592500 | T | T | T |
| 0.55681151059200 | 0.33800923275600 | 0.24084488837900 | T | T | T |
| 0.55698120214300 | 0.33781835637300 | 0.57404751665600 | T | T | T |
| 0.55693651476500 | 0.33775673892900 | 0.90725882246100 | T | T | T |
| 0.89027953797600 | 0.33812294935000 | 0.24102715920800 | T | T | T |
| 0.89038238100300 | 0.33783206932800 | 0.57401432193500 | T | T | T |
| 0.89018980509400 | 0.33782027760600 | 0.90743808681800 | T | T | T |
| 0.16456627648300 | 0.37386894569100 | 0.24300280612700 | T | T | T |
| 0.16289593834300 | 0.36193322188800 | 0.58018180508900 | T | T | T |
| 0.16299416980900 | 0.36199501616600 | 0.91344773618700 | T | T | T |
| 0.49551422669900 | 0.36321834374500 | 0.24655794988300 | T | T | T |
| 0.49602231717600 | 0.36195272208500 | 0.58025881932500 | T | T | T |
| 0.49596993199500 | 0.36201445322700 | 0.91358355816000 | T | T | T |
| 0.82891025148700 | 0.36325631975000 | 0.24657837167900 | T | T | T |
| 0.82944925927100 | 0.36192451632000 | 0.58027485329400 | T | T | T |
| 0.82912128320900 | 0.36212332444500 | 0.91355011900500 | T | T | T |
| 0.16785083793700 | 0.34180870804200 | 0.21039665171100 | T | T | T |
| 0.16289400086100 | 0.35473005197600 | 0.54521819000400 | T | T | T |
| 0.16291838941500 | 0.35473420678300 | 0.87853789213800 | T | T | T |
| 0.49621495587300 | 0.35447492877700 | 0.21187855752400 | T | T | T |

|                  |                  |                  |   |   |   |
|------------------|------------------|------------------|---|---|---|
| 0.49630741399200 | 0.35475579610700 | 0.54527289784100 | T | T | T |
| 0.49633962752500 | 0.35475784162000 | 0.87861805298100 | T | T | T |
| 0.82971089427800 | 0.35448034077300 | 0.21191903701600 | T | T | T |
| 0.82970442904500 | 0.35478716843600 | 0.54528520452400 | T | T | T |
| 0.82958360353200 | 0.35470663515100 | 0.87859073385700 | T | T | T |
| 0.17521424471300 | 0.33468143978600 | 0.27739623037300 | T | T | T |
| 0.17690695670400 | 0.32364548616400 | 0.60522634631100 | T | T | T |
| 0.17708611111600 | 0.32347377820500 | 0.93837329245200 | T | T | T |
| 0.50870763036400 | 0.32668179614000 | 0.27341070430800 | T | T | T |
| 0.50982454831500 | 0.32394941530300 | 0.60549883260200 | T | T | T |
| 0.50966512565200 | 0.32411810653100 | 0.93895822176000 | T | T | T |
| 0.84202869250800 | 0.32675241311800 | 0.27349496828400 | T | T | T |
| 0.84328094765000 | 0.32378944236000 | 0.60541977523400 | T | T | T |
| 0.84274464125100 | 0.32452306795700 | 0.93914188301700 | T | T | T |
| 0.14287540356800 | 0.33059673450200 | 0.27178012944500 | T | T | T |
| 0.14362719356700 | 0.32072047079000 | 0.60111078636400 | T | T | T |
| 0.14377830722700 | 0.32074774488000 | 0.93449144451500 | T | T | T |
| 0.47581719757400 | 0.32221373601400 | 0.26788960202500 | T | T | T |
| 0.47661144064300 | 0.32064027834600 | 0.60100840729400 | T | T | T |
| 0.47647843733300 | 0.32073438468000 | 0.93434960587900 | T | T | T |
| 0.80915221824300 | 0.32225976015100 | 0.26791255300300 | T | T | T |
| 0.81004283940000 | 0.32064553929600 | 0.60103975418300 | T | T | T |
| 0.80962086537200 | 0.32078951574800 | 0.93428577904800 | T | T | T |
| 0.23908400558800 | 0.38791730621500 | 0.25079682411900 | T | T | T |
| 0.23669315471800 | 0.38611434405700 | 0.57232592855900 | T | T | T |
| 0.23668439702400 | 0.38667729559800 | 0.90549725280500 | T | T | T |
| 0.56935169453800 | 0.38644818356400 | 0.23997129048500 | T | T | T |
| 0.56975784836300 | 0.38610830605400 | 0.57315456430100 | T | T | T |
| 0.56958765484500 | 0.38612648522000 | 0.90665397563700 | T | T | T |
| 0.90291665920600 | 0.38651004057700 | 0.23988065291400 | T | T | T |

|                  |                  |                  |   |   |   |
|------------------|------------------|------------------|---|---|---|
| 0.90320210550500 | 0.38608987250100 | 0.57301868150800 | T | T | T |
| 0.90285719483100 | 0.38619175500200 | 0.90673787016900 | T | T | T |
| 0.15189689480100 | 0.30917547884900 | 0.18586490612400 | T | T | T |
| 0.14387291732500 | 0.29954464891000 | 0.51246533200900 | T | T | T |
| 0.14377564102700 | 0.29947227813000 | 0.84575358061100 | T | T | T |
| 0.47715939775500 | 0.30022447061000 | 0.17960152418100 | T | T | T |
| 0.47733836337700 | 0.29958171632900 | 0.51245301823900 | T | T | T |
| 0.47739475322900 | 0.29971871926900 | 0.84581112973400 | T | T | T |
| 0.81072147964000 | 0.30024467641700 | 0.17953790546400 | T | T | T |
| 0.81070965734500 | 0.29966049427400 | 0.51248535019200 | T | T | T |
| 0.81067220844000 | 0.29960211818800 | 0.84578642254800 | T | T | T |
| 0.21235021103300 | 0.40388176255600 | 0.16859014519600 | T | T | T |
| 0.17704748058200 | 0.30540519424200 | 0.51357530697400 | T | T | T |
| 0.17695413635300 | 0.30535375004100 | 0.84689493659100 | T | T | T |
| 0.51033066454600 | 0.30541520748400 | 0.18062788968800 | T | T | T |
| 0.51051344011500 | 0.30539634768500 | 0.51363371901400 | T | T | T |
| 0.51057909359800 | 0.30537679259400 | 0.84697299397800 | T | T | T |
| 0.84389410267000 | 0.30547037194400 | 0.18073288780700 | T | T | T |
| 0.84389027725900 | 0.30535012146700 | 0.51362776585300 | T | T | T |
| 0.84384847327700 | 0.30542061889800 | 0.84695364828900 | T | T | T |
| 0.19524835022100 | 0.88479003905600 | 0.22719862962800 | T | T | T |
| 0.19064053000400 | 0.88724904134700 | 0.55994839617400 | T | T | T |
| 0.19129561093700 | 0.88758158554800 | 0.89323770261200 | T | T | T |
| 0.52357477472100 | 0.88712653063800 | 0.22711610512100 | T | T | T |
| 0.52376411587000 | 0.88717405263900 | 0.56029131177900 | T | T | T |
| 0.52396313877900 | 0.88720138823100 | 0.89365305491400 | T | T | T |
| 0.85705007840300 | 0.88714068803200 | 0.22738590800400 | T | T | T |
| 0.85735160665600 | 0.88722683368200 | 0.56029692807600 | T | T | T |
| 0.85696260168100 | 0.88710610670500 | 0.89344535743100 | T | T | T |
| 0.21332939669700 | 0.89846871553200 | 0.16658058484900 | T | T | T |

|                  |                  |                  |   |   |   |
|------------------|------------------|------------------|---|---|---|
| 0.21704796806600 | 0.97140178190500 | 0.48973541976900 | T | T | T |
| 0.21710817192500 | 0.97142970363500 | 0.82310924838200 | T | T | T |
| 0.55036611049000 | 0.97133328800800 | 0.15629156053900 | T | T | T |
| 0.55042934905600 | 0.97140193480000 | 0.48969875795900 | T | T | T |
| 0.55039118505700 | 0.97137469523600 | 0.82302172411000 | T | T | T |
| 0.88388960455900 | 0.97135340694900 | 0.15639090982700 | T | T | T |
| 0.88367047346900 | 0.97134964618900 | 0.48966610551500 | T | T | T |
| 0.88376749723300 | 0.97140514470800 | 0.82306588847900 | T | T | T |
| 0.22707718639500 | 0.92617024873100 | 0.24662071900000 | T | T | T |
| 0.22362909781000 | 0.92782549382200 | 0.57223721055300 | T | T | T |
| 0.22403905810300 | 0.92805328276800 | 0.90564736417700 | T | T | T |
| 0.55683182727900 | 0.92769097112600 | 0.23887941118900 | T | T | T |
| 0.55688182890600 | 0.92778034829600 | 0.57222356954300 | T | T | T |
| 0.55695832380200 | 0.92786361300800 | 0.90554667278600 | T | T | T |
| 0.89028564757900 | 0.92778257391400 | 0.23895195507800 | T | T | T |
| 0.89034984283600 | 0.92791858346300 | 0.57222803147400 | T | T | T |
| 0.89015456444400 | 0.92754209231800 | 0.90556013015900 | T | T | T |
| 0.16707848383900 | 0.89354576301300 | 0.24357321286500 | T | T | T |
| 0.16377098920400 | 0.90245250731300 | 0.58181009202000 | T | T | T |
| 0.16420721935700 | 0.90222026592700 | 0.91487817734400 | T | T | T |
| 0.49685928297400 | 0.90289623081500 | 0.24935491327200 | T | T | T |
| 0.49698269826500 | 0.90269577031600 | 0.58235538153800 | T | T | T |
| 0.49710262859100 | 0.90262716850000 | 0.91566617788300 | T | T | T |
| 0.83029694832200 | 0.90297516470000 | 0.24963956696400 | T | T | T |
| 0.83047862766300 | 0.90262545113400 | 0.58229998753600 | T | T | T |
| 0.83021723767800 | 0.90264977106100 | 0.91548974315400 | T | T | T |
| 0.16887682265500 | 0.92349455381700 | 0.20996649540600 | T | T | T |
| 0.16245806593200 | 0.90886718263000 | 0.54648582435700 | T | T | T |
| 0.16297947281500 | 0.90891715691200 | 0.87971365389900 | T | T | T |
| 0.49536597690600 | 0.90863082109700 | 0.21378821648500 | T | T | T |

|                  |                  |                  |   |   |   |
|------------------|------------------|------------------|---|---|---|
| 0.49556879129700 | 0.90873790338000 | 0.54690799459600 | T | T | T |
| 0.49574229715000 | 0.90865564498300 | 0.88023722506300 | T | T | T |
| 0.82880324572500 | 0.90850417738100 | 0.21405702822700 | T | T | T |
| 0.82912519244400 | 0.90865138308700 | 0.54687744428200 | T | T | T |
| 0.82883581352000 | 0.90887166282300 | 0.88004864541900 | T | T | T |
| 0.17765006928300 | 0.93547942053100 | 0.27583179374500 | T | T | T |
| 0.17804267822700 | 0.94105506623900 | 0.60595851646100 | T | T | T |
| 0.17821037370600 | 0.94114537562000 | 0.93920277472400 | T | T | T |
| 0.51126472793200 | 0.94139977690000 | 0.27306246861500 | T | T | T |
| 0.51133793019200 | 0.94126317367800 | 0.60624284071500 | T | T | T |
| 0.51135028956600 | 0.94125081539100 | 0.93960577978500 | T | T | T |
| 0.84461677585200 | 0.94160096389100 | 0.27326518745400 | T | T | T |
| 0.84471201345200 | 0.94130210154100 | 0.60620798657500 | T | T | T |
| 0.84463089095700 | 0.94107823137100 | 0.93948261096300 | T | T | T |
| 0.14486587662600 | 0.93513126875900 | 0.27223480769600 | T | T | T |
| 0.14457177106800 | 0.94291518940400 | 0.60241640932800 | T | T | T |
| 0.14475371811500 | 0.94250052023100 | 0.93577394114300 | T | T | T |
| 0.47777114745200 | 0.94359484181200 | 0.26930113884700 | T | T | T |
| 0.47785049114500 | 0.94329593639400 | 0.60260666768000 | T | T | T |
| 0.47786701456700 | 0.94314305760700 | 0.93594356634700 | T | T | T |
| 0.81111704336800 | 0.94371426348300 | 0.26942790090800 | T | T | T |
| 0.81122891345400 | 0.94317281459900 | 0.60256478790000 | T | T | T |
| 0.81114880989700 | 0.94320451189200 | 0.93585805898900 | T | T | T |
| 0.24136775079700 | 0.87990439426800 | 0.25039492939200 | T | T | T |
| 0.23784403604400 | 0.88069896789400 | 0.56926036839600 | T | T | T |
| 0.23824044371800 | 0.88093629432700 | 0.90245248872600 | T | T | T |
| 0.57089192302800 | 0.88044992558000 | 0.23627386783300 | T | T | T |
| 0.57105426854200 | 0.88062012630900 | 0.56942956129800 | T | T | T |
| 0.57114942993600 | 0.88070179865500 | 0.90281453137900 | T | T | T |
| 0.90443529823000 | 0.88061012847700 | 0.23622138300200 | T | T | T |



|                  |                  |                  |   |   |   |
|------------------|------------------|------------------|---|---|---|
| 0.90462180069500 | 0.88083440186100 | 0.56931052299800 | T | T | T |
| 0.90419345384600 | 0.88027797869400 | 0.90283004422000 | T | T | T |
| 0.15146740152500 | 0.95517168703300 | 0.18561675639000 | T | T | T |
| 0.14374557722400 | 0.96412685457000 | 0.51242742672400 | T | T | T |
| 0.14396357938300 | 0.96404601602900 | 0.84571249419200 | T | T | T |
| 0.47700284665600 | 0.96408682573300 | 0.17923940010900 | T | T | T |
| 0.47712432432900 | 0.96413073975100 | 0.51249359841800 | T | T | T |
| 0.47719207189800 | 0.96403689089000 | 0.84585994375500 | T | T | T |
| 0.81052265938100 | 0.96401248529300 | 0.17926772591900 | T | T | T |
| 0.81054545512500 | 0.96404042781900 | 0.51252617911600 | T | T | T |
| 0.81041501490400 | 0.96416783131600 | 0.84575662796700 | T | T | T |
| 0.21414930110200 | 0.87447480434900 | 0.17054606059700 | T | T | T |
| 0.17697558353100 | 0.95808036225000 | 0.51393149261400 | T | T | T |
| 0.17722334277700 | 0.95830090119300 | 0.84714881688400 | T | T | T |
| 0.51018399612900 | 0.95750434138700 | 0.18078181171700 | T | T | T |
| 0.51032373688500 | 0.95773355795100 | 0.51412759878200 | T | T | T |
| 0.51040355308100 | 0.95782042091600 | 0.84741974300700 | T | T | T |
| 0.84368346299100 | 0.95721615114200 | 0.18098642228000 | T | T | T |
| 0.84375847219900 | 0.95787640844300 | 0.51408686894200 | T | T | T |
| 0.84362229824100 | 0.95783311116600 | 0.84734726678900 | T | T | T |
| 0.22748146575900 | 0.37035167703000 | 0.23847481851600 | T | T | T |
| 0.22293634466900 | 0.36631922395200 | 0.56377649670200 | T | T | T |
| 0.22299120765400 | 0.36665217386500 | 0.89705230467300 | T | T | T |
| 0.55609690229300 | 0.36647276082200 | 0.23088649199600 | T | T | T |
| 0.55628709050400 | 0.36635951305500 | 0.56417170158600 | T | T | T |
| 0.55627999400000 | 0.36637406633700 | 0.89745691444000 | T | T | T |
| 0.88950466899400 | 0.36652176862100 | 0.23101299451800 | T | T | T |
| 0.88966301303400 | 0.36634914982500 | 0.56411916508900 | T | T | T |
| 0.88953231077900 | 0.36640201805300 | 0.89759800318300 | T | T | T |
| 0.17195297869400 | 0.37986054860600 | 0.22425150695300 | T | T | T |

|                  |                  |                  |   |   |   |
|------------------|------------------|------------------|---|---|---|
| 0.16832679450800 | 0.37689507835300 | 0.55942849879600 | T | T | T |
| 0.16837940141000 | 0.37690220119300 | 0.89273815813600 | T | T | T |
| 0.50156144825500 | 0.37706227045200 | 0.22595201124800 | T | T | T |
| 0.50166599116500 | 0.37689259850700 | 0.55951394314800 | T | T | T |
| 0.50168664377700 | 0.37689711911500 | 0.89285950467100 | T | T | T |
| 0.83501161975800 | 0.37708178384500 | 0.22599953574300 | T | T | T |
| 0.83506117728300 | 0.37691271615800 | 0.55953025548600 | T | T | T |
| 0.83490896010600 | 0.37688830254200 | 0.89282107338800 | T | T | T |
| 0.15820262257300 | 0.35287917587900 | 0.27419210497500 | T | T | T |
| 0.15981875722200 | 0.34301781872100 | 0.60351434856000 | T | T | T |
| 0.16001159434000 | 0.34293597301000 | 0.93684837356200 | T | T | T |
| 0.49154811763100 | 0.34524119466400 | 0.27041365574200 | T | T | T |
| 0.49269934091800 | 0.34314264570400 | 0.60354266421200 | T | T | T |
| 0.49253968712800 | 0.34326189263000 | 0.93689206280300 | T | T | T |
| 0.82486848586400 | 0.34528690745000 | 0.27044823080100 | T | T | T |
| 0.82617428860900 | 0.34306080259800 | 0.60354122829400 | T | T | T |
| 0.82559159247400 | 0.34350191715300 | 0.93689651939500 | T | T | T |
| 0.16590214335300 | 0.30902839527100 | 0.20060934588900 | T | T | T |
| 0.16025470025800 | 0.30746310781500 | 0.52547861232300 | T | T | T |
| 0.16015574883800 | 0.30741599260300 | 0.85879980514600 | T | T | T |
| 0.49355448762400 | 0.30790388279800 | 0.19249200468700 | T | T | T |
| 0.49368949416100 | 0.30748459101700 | 0.52549156642200 | T | T | T |
| 0.49375328745800 | 0.30752602933300 | 0.85882473441000 | T | T | T |
| 0.82704513516300 | 0.30794833333000 | 0.19251105781500 | T | T | T |
| 0.82707405489000 | 0.30750627892100 | 0.52549270206900 | T | T | T |
| 0.82702724886700 | 0.30749275461400 | 0.85881709243000 | T | T | T |
| 0.22994384487300 | 0.89722756709900 | 0.23779514992300 | T | T | T |
| 0.22317908244400 | 0.89991136294700 | 0.56160501435700 | T | T | T |
| 0.22358769569300 | 0.90027742264200 | 0.89488760992100 | T | T | T |
| 0.55635045468100 | 0.89963764642300 | 0.22839029647900 | T | T | T |

|                  |                  |                  |   |   |   |
|------------------|------------------|------------------|---|---|---|
| 0.55641126967700 | 0.89977380160600 | 0.56168380520700 | T | T | T |
| 0.55652341609200 | 0.89983749892700 | 0.89502122919400 | T | T | T |
| 0.88976730956100 | 0.89972439978800 | 0.22847116428800 | T | T | T |
| 0.88989625526000 | 0.89994133446200 | 0.56165815334400 | T | T | T |
| 0.88967580965200 | 0.89956358680300 | 0.89499763422500 | T | T | T |
| 0.17406855356300 | 0.88690421370500 | 0.22474078665700 | T | T | T |
| 0.16865372091200 | 0.88732134867900 | 0.56069721152500 | T | T | T |
| 0.16926688046600 | 0.88738793673000 | 0.89391102618000 | T | T | T |
| 0.50163631120000 | 0.88733923272300 | 0.22805144780200 | T | T | T |
| 0.50180026902700 | 0.88732986926200 | 0.56115097155000 | T | T | T |
| 0.50198418481100 | 0.88727889923300 | 0.89448614328300 | T | T | T |
| 0.83510221476200 | 0.88730210891700 | 0.22834191216300 | T | T | T |
| 0.83537369618900 | 0.88727606959300 | 0.56112835070600 | T | T | T |
| 0.83500630477000 | 0.88736346281800 | 0.89427424106000 | T | T | T |
| 0.16139927357600 | 0.91494296938000 | 0.27456777499700 | T | T | T |
| 0.16108351666700 | 0.92112957165300 | 0.60497297111100 | T | T | T |
| 0.16135762341200 | 0.92098529812600 | 0.93828317440500 | T | T | T |
| 0.49422689501900 | 0.92163248477400 | 0.27207767302000 | T | T | T |
| 0.49433306724300 | 0.92142283730800 | 0.60527755919500 | T | T | T |
| 0.49437754755200 | 0.92135678311000 | 0.93860188509100 | T | T | T |
| 0.82758751536200 | 0.92180865178800 | 0.27227525132600 | T | T | T |
| 0.82774288101700 | 0.92138364571800 | 0.60523718997000 | T | T | T |
| 0.82761304628700 | 0.92128353449600 | 0.93847925830000 | T | T | T |
| 0.16613714415500 | 0.95579015299800 | 0.19977742656900 | T | T | T |
| 0.16005254331000 | 0.95623436996200 | 0.52571283557900 | T | T | T |
| 0.16032969451500 | 0.95623274157600 | 0.85896036639300 | T | T | T |
| 0.49322514288200 | 0.95613442527500 | 0.19252679047300 | T | T | T |
| 0.49334619902900 | 0.95617113267400 | 0.52584252098500 | T | T | T |
| 0.49344492986300 | 0.95614270715300 | 0.85915450936500 | T | T | T |
| 0.82666219917600 | 0.95604049082700 | 0.19264273333900 | T | T | T |

|                  |                  |                  |   |   |   |
|------------------|------------------|------------------|---|---|---|
| 0.82679975431100 | 0.95615191301600 | 0.52582204347100 | T | T | T |
| 0.82666124209000 | 0.95621198495800 | 0.85908481067300 | T | T | T |

**7) Large supercell 2-H<sup>+</sup><sub>sol</sub> IS**

POSCAR

1

|                   |                   |                   |
|-------------------|-------------------|-------------------|
| 46.81727999995964 | 0.00000000000000  | 0.00000000000000  |
| 0.00000000000000  | 30.38812199999634 | 0.00000000000000  |
| 0.00000000000000  | 0.00000000000000  | 49.65722999997833 |

Ga P H O

540 540 342 144

Direct

|                  |                  |                  |   |   |   |
|------------------|------------------|------------------|---|---|---|
| 0.12702742354600 | 0.06462605636630 | 0.05679319254610 | T | T | T |
| 0.12708281605400 | 0.06462480476240 | 0.39008841668600 | T | T | T |
| 0.12701793709500 | 0.06460543878690 | 0.72346443088100 | T | T | T |
| 0.46046447200400 | 0.06461676161060 | 0.05676741792660 | T | T | T |
| 0.46047964167200 | 0.06461650319740 | 0.39009510824100 | T | T | T |
| 0.46044578711900 | 0.06462352974960 | 0.72345741964000 | T | T | T |
| 0.79376062984500 | 0.06462858668710 | 0.05678423553700 | T | T | T |
| 0.79380294950600 | 0.06463450587570 | 0.39008080792500 | T | T | T |
| 0.79375583651100 | 0.06461810464370 | 0.72344465566200 | T | T | T |
| 0.12515331023900 | 0.06474896176250 | 0.27772076380400 | T | T | T |
| 0.12516830305500 | 0.06474873140630 | 0.61106695607000 | T | T | T |
| 0.12516948533600 | 0.06474649938950 | 0.94440753614600 | T | T | T |
| 0.45853812275600 | 0.06474673111780 | 0.27772718609900 | T | T | T |
| 0.45854357082800 | 0.06476343621170 | 0.61107721407600 | T | T | T |
| 0.45854731685900 | 0.06475443173540 | 0.94440226403200 | T | T | T |
| 0.79186398700300 | 0.06475223792890 | 0.27771551078600 | T | T | T |
| 0.79185207203900 | 0.06475781343460 | 0.61106085602700 | T | T | T |
| 0.79185835585200 | 0.06474761022310 | 0.94440711639500 | T | T | T |

|                  |                  |                  |   |   |   |
|------------------|------------------|------------------|---|---|---|
| 0.12530883145200 | 0.06375537964840 | 0.16360913189700 | T | T | T |
| 0.12530258618300 | 0.06373079880510 | 0.49692468362100 | T | T | T |
| 0.12532008279800 | 0.06374177573950 | 0.83027450369700 | T | T | T |
| 0.45868003391300 | 0.06374233984510 | 0.16360037707000 | T | T | T |
| 0.45867663497800 | 0.06373528620800 | 0.49693187401600 | T | T | T |
| 0.45868156117100 | 0.06374603315070 | 0.83027538058600 | T | T | T |
| 0.79200189416600 | 0.06375384123280 | 0.16360925918100 | T | T | T |
| 0.79199612614100 | 0.06373783515470 | 0.49692211135800 | T | T | T |
| 0.79199962676400 | 0.06374544195440 | 0.83027083705200 | T | T | T |
| 0.29189996228700 | 0.06413547019950 | 0.05479892112340 | T | T | T |
| 0.29190584700100 | 0.06412908680190 | 0.38812928963900 | T | T | T |
| 0.29190615743200 | 0.06412538928080 | 0.72147069149200 | T | T | T |
| 0.62525453378200 | 0.06413348361890 | 0.05480190038200 | T | T | T |
| 0.62525569201300 | 0.06413725571800 | 0.38812718113300 | T | T | T |
| 0.62524242418200 | 0.06413979064930 | 0.72147241396000 | T | T | T |
| 0.95856724393100 | 0.06414115516660 | 0.05481054045580 | T | T | T |
| 0.95856885403100 | 0.06415585164660 | 0.38811852376300 | T | T | T |
| 0.95856666303800 | 0.06412851177550 | 0.72146604190500 | T | T | T |
| 0.29206532061000 | 0.06420677615220 | 0.27665662424800 | T | T | T |
| 0.29207327562800 | 0.06421050330600 | 0.61000339992100 | T | T | T |
| 0.29206829993600 | 0.06420655077190 | 0.94332786145600 | T | T | T |
| 0.62542321308200 | 0.06420914381760 | 0.27663888799100 | T | T | T |
| 0.62541080586500 | 0.06422217477600 | 0.60999472275500 | T | T | T |
| 0.62540315583200 | 0.06420675025350 | 0.94332425283000 | T | T | T |
| 0.95871667163500 | 0.06421949853450 | 0.27664056687000 | T | T | T |
| 0.95873175653800 | 0.06421003369590 | 0.60998263650400 | T | T | T |
| 0.95872482514400 | 0.06421288643830 | 0.94333359103900 | T | T | T |
| 0.29195726265000 | 0.06447461438790 | 0.16542971766200 | T | T | T |
| 0.29196474312800 | 0.06446721211100 | 0.49877277128600 | T | T | T |
| 0.29196533384600 | 0.06446540184810 | 0.83210543186800 | T | T | T |

|                  |                  |                  |   |   |   |
|------------------|------------------|------------------|---|---|---|
| 0.62531740767200 | 0.06447625864940 | 0.16542946273800 | T | T | T |
| 0.62530750140700 | 0.06448401273330 | 0.49876710763200 | T | T | T |
| 0.62529332866000 | 0.06447961861780 | 0.83209983817300 | T | T | T |
| 0.95860681221300 | 0.06448203203550 | 0.16544615616300 | T | T | T |
| 0.95861777189600 | 0.06448367944640 | 0.49876142705200 | T | T | T |
| 0.95861566860800 | 0.06447748193560 | 0.83210166220100 | T | T | T |
| 0.12725265201300 | 0.19607972973400 | 0.05692573475310 | T | T | T |
| 0.12726218509700 | 0.19609173293700 | 0.39024009831200 | T | T | T |
| 0.12725830738000 | 0.19610331203000 | 0.72358810476800 | T | T | T |
| 0.46064626755300 | 0.19608965303100 | 0.05691725131910 | T | T | T |
| 0.46065016731100 | 0.19610337617200 | 0.39024812594100 | T | T | T |
| 0.46063980700700 | 0.19609343424600 | 0.72359182470400 | T | T | T |
| 0.79393607066900 | 0.19607598908600 | 0.05692874513390 | T | T | T |
| 0.79395853997900 | 0.19608092555100 | 0.39023861644500 | T | T | T |
| 0.79393700523600 | 0.19609075525500 | 0.72358633674300 | T | T | T |
| 0.12519969707000 | 0.19613384611800 | 0.27759104668000 | T | T | T |
| 0.12521758188700 | 0.19613677743700 | 0.61093891485800 | T | T | T |
| 0.12521506105600 | 0.19613369165300 | 0.94427925956300 | T | T | T |
| 0.45857476575400 | 0.19614271830000 | 0.27759659995200 | T | T | T |
| 0.45857790352400 | 0.19613789942400 | 0.61094247719800 | T | T | T |
| 0.45857916775400 | 0.19612465271100 | 0.94427072569700 | T | T | T |
| 0.79190625103800 | 0.19612410165300 | 0.27758651851000 | T | T | T |
| 0.79189279234700 | 0.19612528342300 | 0.61093752668600 | T | T | T |
| 0.79190086632300 | 0.19612643260300 | 0.94428344199800 | T | T | T |
| 0.12544314153300 | 0.19749679798800 | 0.16361872126300 | T | T | T |
| 0.12544370068700 | 0.19756585305700 | 0.49693551448100 | T | T | T |
| 0.12545594197400 | 0.19749423699100 | 0.83028009958900 | T | T | T |
| 0.45880616566700 | 0.19753970190800 | 0.16361198109400 | T | T | T |
| 0.45880705187900 | 0.19753734711900 | 0.49694405095100 | T | T | T |
| 0.45880395030000 | 0.19751023816200 | 0.83028009446700 | T | T | T |

|                  |                  |                  |   |   |   |
|------------------|------------------|------------------|---|---|---|
| 0.79213878821700 | 0.19746093129900 | 0.16362402721200 | T | T | T |
| 0.79213334588600 | 0.19748610354200 | 0.49693749705100 | T | T | T |
| 0.79213464473600 | 0.19748185047000 | 0.83027857969200 | T | T | T |
| 0.29191603079600 | 0.19652871639500 | 0.05483741087390 | T | T | T |
| 0.29192224082200 | 0.19654597384800 | 0.38816315570600 | T | T | T |
| 0.29192382671700 | 0.19654576622600 | 0.72150485517300 | T | T | T |
| 0.62526668888800 | 0.19652640577600 | 0.05484061952210 | T | T | T |
| 0.62526841128700 | 0.19653632780700 | 0.38816336337100 | T | T | T |
| 0.62525578347600 | 0.19652296954600 | 0.72150742803600 | T | T | T |
| 0.95857957548300 | 0.19651760288800 | 0.05484886494630 | T | T | T |
| 0.95858258291800 | 0.19651434508800 | 0.38815614846100 | T | T | T |
| 0.95858112000200 | 0.19653262857700 | 0.72150342512600 | T | T | T |
| 0.29203804799900 | 0.19656247956100 | 0.27650938691700 | T | T | T |
| 0.29204696050900 | 0.19656797758800 | 0.60985418800600 | T | T | T |
| 0.29204352338900 | 0.19654636550000 | 0.94318790836000 | T | T | T |
| 0.62539360550700 | 0.19656449701600 | 0.27650184043900 | T | T | T |
| 0.62538195214500 | 0.19654954776300 | 0.60985648702900 | T | T | T |
| 0.62537774688200 | 0.19654426272600 | 0.94319153073200 | T | T | T |
| 0.95869566822100 | 0.19653066889300 | 0.27650751889600 | T | T | T |
| 0.95870609217700 | 0.19654645293000 | 0.60984708841100 | T | T | T |
| 0.95870052858800 | 0.19654226230700 | 0.94319533975500 | T | T | T |
| 0.29196730105800 | 0.19623419084700 | 0.16545195987100 | T | T | T |
| 0.29197642735000 | 0.19625303917000 | 0.49879265754600 | T | T | T |
| 0.29197690922700 | 0.19623958235900 | 0.83212554741000 | T | T | T |
| 0.62532691214400 | 0.19623840258200 | 0.16545635657900 | T | T | T |
| 0.62531936702800 | 0.19623554922200 | 0.49878998816900 | T | T | T |
| 0.62530644006900 | 0.19622780353800 | 0.83212304866700 | T | T | T |
| 0.95862530335600 | 0.19621760600400 | 0.16546497039500 | T | T | T |
| 0.95863335070500 | 0.19622754289100 | 0.49877931442400 | T | T | T |
| 0.95862904418000 | 0.19622792409100 | 0.83212332066400 | T | T | T |

|                  |                  |                  |   |   |   |
|------------------|------------------|------------------|---|---|---|
| 0.00041079994210 | 0.01609289376770 | 0.00909005350177 | T | T | T |
| 0.00039592712730 | 0.01608699518800 | 0.34240943492900 | T | T | T |
| 0.00040608536727 | 0.01606843272180 | 0.67574873163700 | T | T | T |
| 0.33376321247100 | 0.01605711761710 | 0.00907639886338 | T | T | T |
| 0.33376146964400 | 0.01603742833300 | 0.34241740038700 | T | T | T |
| 0.33376905910200 | 0.01605549511210 | 0.67574920881600 | T | T | T |
| 0.66710465382600 | 0.01607195909800 | 0.00907978449969 | T | T | T |
| 0.66711165485900 | 0.01605549352170 | 0.34240036776400 | T | T | T |
| 0.66710034362500 | 0.01605876487300 | 0.67574269179600 | T | T | T |
| 0.33261516683900 | 0.01283834957110 | 0.22586698027900 | T | T | T |
| 0.33261541872200 | 0.01283732650600 | 0.55921116194800 | T | T | T |
| 0.33261825256200 | 0.01284931947770 | 0.89254622677800 | T | T | T |
| 0.66595633112200 | 0.01288594065390 | 0.22586380633700 | T | T | T |
| 0.66595151729200 | 0.01286397339870 | 0.55920655673200 | T | T | T |
| 0.66593598161300 | 0.01288485108870 | 0.89254872021900 | T | T | T |
| 0.99923744712200 | 0.01289142753930 | 0.22587668783800 | T | T | T |
| 0.99925404785300 | 0.01285970172150 | 0.55920476658300 | T | T | T |
| 0.99924855416600 | 0.01287877080950 | 0.89255114109400 | T | T | T |
| 0.00065299109259 | 0.01613561077200 | 0.11775752528000 | T | T | T |
| 0.00066131194897 | 0.01608943113430 | 0.45108175418300 | T | T | T |
| 0.00066584379899 | 0.01610234273810 | 0.78442869055700 | T | T | T |
| 0.33402206620300 | 0.01608308094430 | 0.11774667915300 | T | T | T |
| 0.33402375993000 | 0.01606313555180 | 0.45108954648300 | T | T | T |
| 0.33402384842000 | 0.01608974407870 | 0.78442903492700 | T | T | T |
| 0.66735814938900 | 0.01611462109130 | 0.11774583759900 | T | T | T |
| 0.66736011171400 | 0.01607368556370 | 0.45108126299000 | T | T | T |
| 0.66734247666300 | 0.01609515635780 | 0.78442553649900 | T | T | T |
| 0.16606598917400 | 0.01570453876030 | 0.00916855278414 | T | T | T |
| 0.16605943713400 | 0.01567936359290 | 0.34249579181700 | T | T | T |
| 0.16606557855700 | 0.01568848846750 | 0.67583449104400 | T | T | T |



|                  |                  |                  |   |   |   |
|------------------|------------------|------------------|---|---|---|
| 0.49945184531300 | 0.01569037172630 | 0.00916039472519 | T | T | T |
| 0.49945122687400 | 0.01566757944330 | 0.34249681591500 | T | T | T |
| 0.49944325780200 | 0.01569142630280 | 0.67583882468500 | T | T | T |
| 0.83275234739600 | 0.01571327284480 | 0.00917521195248 | T | T | T |
| 0.83275800011600 | 0.01571049065040 | 0.34248541226800 | T | T | T |
| 0.83275045667400 | 0.01569179021510 | 0.67583504221400 | T | T | T |
| 0.16554094601100 | 0.01537808866970 | 0.22586472489000 | T | T | T |
| 0.16554629271400 | 0.01536706351560 | 0.55920819601300 | T | T | T |
| 0.16555180429100 | 0.01536517742490 | 0.89254452465300 | T | T | T |
| 0.49890971166600 | 0.01537022876620 | 0.22585874075600 | T | T | T |
| 0.49890482711200 | 0.01536654051340 | 0.55920276346300 | T | T | T |
| 0.49890637893600 | 0.01537502992470 | 0.89253430197600 | T | T | T |
| 0.83223131594000 | 0.01540167451210 | 0.22586939804800 | T | T | T |
| 0.83222773297500 | 0.01537349042230 | 0.55920178040200 | T | T | T |
| 0.83222947484700 | 0.01537938518500 | 0.89254553443100 | T | T | T |
| 0.16315927698700 | 0.98059419427700 | 0.10279381682700 | T | T | T |
| 0.16316075051200 | 0.98056594241400 | 0.43613215830800 | T | T | T |
| 0.16317011772500 | 0.98056447497700 | 0.76947738542600 | T | T | T |
| 0.49652962947800 | 0.98057080433100 | 0.10278584015400 | T | T | T |
| 0.49652154121000 | 0.98055106530000 | 0.43612797467000 | T | T | T |
| 0.49652284664000 | 0.98057564459800 | 0.76947160104000 | T | T | T |
| 0.82985789610900 | 0.98059898785500 | 0.10281108155600 | T | T | T |
| 0.82985943745200 | 0.98057504643600 | 0.43613008727300 | T | T | T |
| 0.82985505145700 | 0.98056727492200 | 0.76947996845300 | T | T | T |
| 0.08355240124870 | 0.01600343364380 | 0.00905516604737 | T | T | T |
| 0.08354283840310 | 0.01598772286810 | 0.34239377242000 | T | T | T |
| 0.08355740634280 | 0.01598562319560 | 0.67571509014500 | T | T | T |
| 0.41691189096700 | 0.01598698342320 | 0.00904093599453 | T | T | T |
| 0.41691497643300 | 0.01596950371690 | 0.34239028796300 | T | T | T |
| 0.41691164462100 | 0.01598897570420 | 0.67571924656100 | T | T | T |

|                  |                  |                  |   |   |   |
|------------------|------------------|------------------|---|---|---|
| 0.75023742242000 | 0.01600025024080 | 0.00905621301471 | T | T | T |
| 0.75024708210900 | 0.01598940820290 | 0.34237630550000 | T | T | T |
| 0.75023235091900 | 0.01598364852080 | 0.67571390305900 | T | T | T |
| 0.08294903864000 | 0.01896600330480 | 0.22819933042900 | T | T | T |
| 0.08295897381560 | 0.01893354531270 | 0.56153300659900 | T | T | T |
| 0.08296293895390 | 0.01894026038790 | 0.89487401776300 | T | T | T |
| 0.41633480658200 | 0.01893020598540 | 0.22819299696600 | T | T | T |
| 0.41632961708500 | 0.01892449873240 | 0.56153574888000 | T | T | T |
| 0.41633858276900 | 0.01894389623120 | 0.89487561196700 | T | T | T |
| 0.74965887846300 | 0.01895830123250 | 0.22819074074600 | T | T | T |
| 0.74965240867400 | 0.01892079194450 | 0.56152902324500 | T | T | T |
| 0.74964896550700 | 0.01893133316900 | 0.89487550193600 | T | T | T |
| 0.08376664998430 | 0.01272968855850 | 0.12117731052000 | T | T | T |
| 0.08378226713220 | 0.01267963112360 | 0.45422702035700 | T | T | T |
| 0.08378040386350 | 0.01270813530520 | 0.78788477333700 | T | T | T |
| 0.41715559165600 | 0.01268643854070 | 0.12106424322100 | T | T | T |
| 0.41715805121100 | 0.01267461297400 | 0.45425785062100 | T | T | T |
| 0.41715325672900 | 0.01271078227430 | 0.78780528750400 | T | T | T |
| 0.75046905207100 | 0.01272667763860 | 0.12107394649900 | T | T | T |
| 0.75048257653600 | 0.01268360397630 | 0.45422537080900 | T | T | T |
| 0.75046439730300 | 0.01270551168040 | 0.78777286592300 | T | T | T |
| 0.24984476268800 | 0.01599612886630 | 0.00773958509227 | T | T | T |
| 0.24984189689100 | 0.01596076882960 | 0.34108646669100 | T | T | T |
| 0.24984648572100 | 0.01598393396520 | 0.67440724003000 | T | T | T |
| 0.58319783940400 | 0.01599272452420 | 0.00772843940766 | T | T | T |
| 0.58320089863000 | 0.01597111031300 | 0.34106367900100 | T | T | T |
| 0.58319108656300 | 0.01598907580930 | 0.67440614446100 | T | T | T |
| 0.91651567784800 | 0.01602050679270 | 0.00775106274201 | T | T | T |
| 0.91651261020500 | 0.01601277191500 | 0.34107007883300 | T | T | T |
| 0.91651532137600 | 0.01599441134660 | 0.67440345466800 | T | T | T |

|                  |                  |                  |   |   |   |
|------------------|------------------|------------------|---|---|---|
| 0.24974815172900 | 0.01889025553610 | 0.22984343732700 | T | T | T |
| 0.24974475984200 | 0.01888191283410 | 0.56318925765600 | T | T | T |
| 0.24974979098600 | 0.01891303621910 | 0.89651961774100 | T | T | T |
| 0.58310305579600 | 0.01888052669740 | 0.22984121033100 | T | T | T |
| 0.58309608775400 | 0.01886506951280 | 0.56318643619800 | T | T | T |
| 0.58309180407500 | 0.01888221493880 | 0.89652300866300 | T | T | T |
| 0.91640734246900 | 0.01895357398700 | 0.22985673764000 | T | T | T |
| 0.91641363081800 | 0.01889051905940 | 0.56319029208300 | T | T | T |
| 0.91641375492500 | 0.01891648666570 | 0.89652861055300 | T | T | T |
| 0.25213304443100 | 0.01615133801840 | 0.11775991283700 | T | T | T |
| 0.25213141236900 | 0.01612698351870 | 0.45108996632800 | T | T | T |
| 0.25213944633800 | 0.01616208176670 | 0.78443640953200 | T | T | T |
| 0.58548186904900 | 0.01614423311100 | 0.11775828968500 | T | T | T |
| 0.58547788696700 | 0.01611667144950 | 0.45108587593100 | T | T | T |
| 0.58547120622600 | 0.01614509720780 | 0.78443685696400 | T | T | T |
| 0.91879679334100 | 0.01619595369320 | 0.11777450695100 | T | T | T |
| 0.91880501635500 | 0.01615200388860 | 0.45107748150000 | T | T | T |
| 0.91880212100800 | 0.01616696840640 | 0.78444106267900 | T | T | T |
| 0.04311476757040 | 0.06417189840060 | 0.05523253003250 | T | T | T |
| 0.04308953562270 | 0.06417905560610 | 0.38853607546300 | T | T | T |
| 0.04311673464490 | 0.06415987875480 | 0.72188400553000 | T | T | T |
| 0.37646207708600 | 0.06416345434430 | 0.05521729957220 | T | T | T |
| 0.37645518267100 | 0.06415701790520 | 0.38854097788000 | T | T | T |
| 0.37646390474500 | 0.06416036523760 | 0.72189062722000 | T | T | T |
| 0.70980278449600 | 0.06417297302570 | 0.05522476062330 | T | T | T |
| 0.70979725172400 | 0.06417323027000 | 0.38853912999100 | T | T | T |
| 0.70979443536200 | 0.06416990061710 | 0.72187749329900 | T | T | T |
| 0.04134047248760 | 0.06448043206340 | 0.27769484796900 | T | T | T |
| 0.04135816562550 | 0.06447907816860 | 0.61103255043300 | T | T | T |
| 0.04135122097520 | 0.06448027993230 | 0.94438208555700 | T | T | T |

|                  |                  |                  |   |   |   |
|------------------|------------------|------------------|---|---|---|
| 0.37471058626500 | 0.06446747633900 | 0.27769691618600 | T | T | T |
| 0.37471191033100 | 0.06447699813350 | 0.61104725789000 | T | T | T |
| 0.37471398523700 | 0.06447318567770 | 0.94437411565900 | T | T | T |
| 0.70805708720600 | 0.06448028929170 | 0.27768806900600 | T | T | T |
| 0.70803799123100 | 0.06448512157760 | 0.61103554818500 | T | T | T |
| 0.70803568020000 | 0.06447592905920 | 0.94438027080500 | T | T | T |
| 0.04130242922460 | 0.06468967541130 | 0.16559740121000 | T | T | T |
| 0.04132339913080 | 0.06466945670290 | 0.49890431378200 | T | T | T |
| 0.04131321310910 | 0.06468196838360 | 0.83225553733900 | T | T | T |
| 0.37467062420900 | 0.06467270350670 | 0.16557974991000 | T | T | T |
| 0.37467759546100 | 0.06466163070140 | 0.49891887615800 | T | T | T |
| 0.37467378833700 | 0.06467168679920 | 0.83225684094400 | T | T | T |
| 0.70801519621300 | 0.06468563061490 | 0.16558774001400 | T | T | T |
| 0.70801393937000 | 0.06467699967690 | 0.49891125976200 | T | T | T |
| 0.70799969851400 | 0.06468046957980 | 0.83225210103900 | T | T | T |
| 0.20597185556200 | 0.06428205615110 | 0.05533192836570 | T | T | T |
| 0.20596492368900 | 0.06427350940420 | 0.38866089019700 | T | T | T |
| 0.20597395237600 | 0.06426915942600 | 0.72200044200300 | T | T | T |
| 0.53934787383700 | 0.06427788044080 | 0.05532729685540 | T | T | T |
| 0.53933725042200 | 0.06427437194910 | 0.38866564983400 | T | T | T |
| 0.53933581000400 | 0.06428513663580 | 0.72199665522000 | T | T | T |
| 0.87265665631700 | 0.06428616344430 | 0.05534407058680 | T | T | T |
| 0.87265720979100 | 0.06429226351230 | 0.38865431471800 | T | T | T |
| 0.87265125465900 | 0.06427662824280 | 0.72199492649100 | T | T | T |
| 0.20791577162400 | 0.06443581297730 | 0.27777805427900 | T | T | T |
| 0.20791587627900 | 0.06443951908280 | 0.61113093492600 | T | T | T |
| 0.20792116955200 | 0.06443843376950 | 0.94446225763800 | T | T | T |
| 0.54127503457300 | 0.06443729078380 | 0.27777662462400 | T | T | T |
| 0.54126628649300 | 0.06444790631280 | 0.61112719708400 | T | T | T |
| 0.54126924010900 | 0.06443694339570 | 0.94445116273800 | T | T | T |

|                  |                  |                  |   |   |   |
|------------------|------------------|------------------|---|---|---|
| 0.87460058000400 | 0.06444768544030 | 0.27777309501800 | T | T | T |
| 0.87459220264000 | 0.06444489818920 | 0.61111337596500 | T | T | T |
| 0.87459490323700 | 0.06444647939040 | 0.94446152660400 | T | T | T |
| 0.20821727650000 | 0.06623859611880 | 0.16569969596800 | T | T | T |
| 0.20821263109800 | 0.06620274572870 | 0.49904336227200 | T | T | T |
| 0.20821722268000 | 0.06624473160290 | 0.83237224682000 | T | T | T |
| 0.54160448682000 | 0.06626287193910 | 0.16570164288500 | T | T | T |
| 0.54158794391100 | 0.06622015872140 | 0.49903640657200 | T | T | T |
| 0.54159472058700 | 0.06629896139820 | 0.83237140518400 | T | T | T |
| 0.87489495783500 | 0.06627225416820 | 0.16572133659800 | T | T | T |
| 0.87490208958700 | 0.06626791901340 | 0.49902796831800 | T | T | T |
| 0.87489369379100 | 0.06628361219120 | 0.83237277458500 | T | T | T |
| 0.00000000000000 | 0.13043999673400 | 0.00000000000000 | F | F | F |
| 0.00000000000000 | 0.13043999673400 | 0.33333333333400 | F | F | F |
| 0.00000000000000 | 0.13043999673400 | 0.66666666666600 | F | F | F |
| 0.33333333333400 | 0.13043999673400 | 0.00000000000000 | F | F | F |
| 0.33333333333400 | 0.13043999673400 | 0.33333333333400 | F | F | F |
| 0.33333333333400 | 0.13043999673400 | 0.66666666666600 | F | F | F |
| 0.66666666666600 | 0.13043999673400 | 0.00000000000000 | F | F | F |
| 0.66666666666600 | 0.13043999673400 | 0.33333333333400 | F | F | F |
| 0.66666666666600 | 0.13043999673400 | 0.66666666666600 | F | F | F |
| 0.00000000000000 | 0.13043999673400 | 0.22222334138000 | F | F | F |
| 0.00000000000000 | 0.13043999673400 | 0.55555667471300 | F | F | F |
| 0.00000000000000 | 0.13043999673400 | 0.88889000804700 | F | F | F |
| 0.33333333333400 | 0.13043999673400 | 0.22222334138000 | F | F | F |
| 0.33333333333400 | 0.13043999673400 | 0.55555667471300 | F | F | F |
| 0.33333333333400 | 0.13043999673400 | 0.88889000804700 | F | F | F |
| 0.66666666666600 | 0.13043999673400 | 0.22222334138000 | F | F | F |
| 0.66666666666600 | 0.13043999673400 | 0.55555667471300 | F | F | F |
| 0.66666666666600 | 0.13043999673400 | 0.88889000804700 | F | F | F |

|                    |                  |                    |   |   |   |
|--------------------|------------------|--------------------|---|---|---|
| 0.0000000000000000 | 0.13043999673400 | 0.11111000180100   | F | F | F |
| 0.0000000000000000 | 0.13043999673400 | 0.44444333513300   | F | F | F |
| 0.0000000000000000 | 0.13043999673400 | 0.77777666846700   | F | F | F |
| 0.333333333333400  | 0.13043999673400 | 0.11111000180100   | F | F | F |
| 0.333333333333400  | 0.13043999673400 | 0.44444333513300   | F | F | F |
| 0.333333333333400  | 0.13043999673400 | 0.77777666846700   | F | F | F |
| 0.666666666666600  | 0.13043999673400 | 0.11111000180100   | F | F | F |
| 0.666666666666600  | 0.13043999673400 | 0.44444333513300   | F | F | F |
| 0.666666666666600  | 0.13043999673400 | 0.77777666846700   | F | F | F |
| 0.16666666667500   | 0.13043999673400 | 0.0000000000000000 | F | F | F |
| 0.16666666667500   | 0.13043999673400 | 0.333333333333400  | F | F | F |
| 0.16666666667500   | 0.13043999673400 | 0.666666666666600  | F | F | F |
| 0.50000000000900   | 0.13043999673400 | 0.0000000000000000 | F | F | F |
| 0.50000000000900   | 0.13043999673400 | 0.333333333333400  | F | F | F |
| 0.50000000000900   | 0.13043999673400 | 0.666666666666600  | F | F | F |
| 0.83333333334100   | 0.13043999673400 | 0.0000000000000000 | F | F | F |
| 0.83333333334100   | 0.13043999673400 | 0.333333333333400  | F | F | F |
| 0.83333333334100   | 0.13043999673400 | 0.666666666666600  | F | F | F |
| 0.16666666667500   | 0.13043999673400 | 0.22222334138000   | F | F | F |
| 0.16666666667500   | 0.13043999673400 | 0.55555667471300   | F | F | F |
| 0.16666666667500   | 0.13043999673400 | 0.88889000804700   | F | F | F |
| 0.50000000000900   | 0.13043999673400 | 0.22222334138000   | F | F | F |
| 0.50000000000900   | 0.13043999673400 | 0.55555667471300   | F | F | F |
| 0.50000000000900   | 0.13043999673400 | 0.88889000804700   | F | F | F |
| 0.83333333334100   | 0.13043999673400 | 0.22222334138000   | F | F | F |
| 0.83333333334100   | 0.13043999673400 | 0.55555667471300   | F | F | F |
| 0.83333333334100   | 0.13043999673400 | 0.88889000804700   | F | F | F |
| 0.16666666667500   | 0.13043999673400 | 0.11111000180100   | F | F | F |
| 0.16666666667500   | 0.13043999673400 | 0.44444333513300   | F | F | F |
| 0.16666666667500   | 0.13043999673400 | 0.77777666846700   | F | F | F |

|                  |                  |                  |   |   |   |
|------------------|------------------|------------------|---|---|---|
| 0.50000000000900 | 0.13043999673400 | 0.11111000180100 | F | F | F |
| 0.50000000000900 | 0.13043999673400 | 0.44444333513300 | F | F | F |
| 0.50000000000900 | 0.13043999673400 | 0.77777666846700 | F | F | F |
| 0.8333333334100  | 0.13043999673400 | 0.11111000180100 | F | F | F |
| 0.8333333334100  | 0.13043999673400 | 0.44444333513300 | F | F | F |
| 0.8333333334100  | 0.13043999673400 | 0.77777666846700 | F | F | F |
| 0.0833333332670  | 0.13043999673400 | 0.00000000000000 | F | F | F |
| 0.0833333332670  | 0.13043999673400 | 0.3333333333400  | F | F | F |
| 0.0833333332670  | 0.13043999673400 | 0.6666666666600  | F | F | F |
| 0.4166666666100  | 0.13043999673400 | 0.00000000000000 | F | F | F |
| 0.4166666666100  | 0.13043999673400 | 0.3333333333400  | F | F | F |
| 0.4166666666100  | 0.13043999673400 | 0.6666666666600  | F | F | F |
| 0.7499999999300  | 0.13043999673400 | 0.00000000000000 | F | F | F |
| 0.7499999999300  | 0.13043999673400 | 0.3333333333400  | F | F | F |
| 0.7499999999300  | 0.13043999673400 | 0.6666666666600  | F | F | F |
| 0.0833333332670  | 0.13043999673400 | 0.22222334138000 | F | F | F |
| 0.0833333332670  | 0.13043999673400 | 0.55555667471300 | F | F | F |
| 0.0833333332670  | 0.13043999673400 | 0.88889000804700 | F | F | F |
| 0.4166666666100  | 0.13043999673400 | 0.22222334138000 | F | F | F |
| 0.4166666666100  | 0.13043999673400 | 0.55555667471300 | F | F | F |
| 0.4166666666100  | 0.13043999673400 | 0.88889000804700 | F | F | F |
| 0.7499999999300  | 0.13043999673400 | 0.22222334138000 | F | F | F |
| 0.7499999999300  | 0.13043999673400 | 0.55555667471300 | F | F | F |
| 0.7499999999300  | 0.13043999673400 | 0.88889000804700 | F | F | F |
| 0.0833333332670  | 0.13043999673400 | 0.11111000180100 | F | F | F |
| 0.0833333332670  | 0.13043999673400 | 0.44444333513300 | F | F | F |
| 0.0833333332670  | 0.13043999673400 | 0.77777666846700 | F | F | F |
| 0.4166666666100  | 0.13043999673400 | 0.11111000180100 | F | F | F |
| 0.4166666666100  | 0.13043999673400 | 0.44444333513300 | F | F | F |
| 0.4166666666100  | 0.13043999673400 | 0.77777666846700 | F | F | F |

|                  |                  |                  |   |   |   |
|------------------|------------------|------------------|---|---|---|
| 0.7499999999300  | 0.13043999673400 | 0.11111000180100 | F | F | F |
| 0.7499999999300  | 0.13043999673400 | 0.44444333513300 | F | F | F |
| 0.7499999999300  | 0.13043999673400 | 0.77777666846700 | F | F | F |
| 0.25000000008900 | 0.13043999673400 | 0.00000000000000 | F | F | F |
| 0.25000000008900 | 0.13043999673400 | 0.33333333333400 | F | F | F |
| 0.25000000008900 | 0.13043999673400 | 0.66666666666600 | F | F | F |
| 0.58333333342100 | 0.13043999673400 | 0.00000000000000 | F | F | F |
| 0.58333333342100 | 0.13043999673400 | 0.33333333333400 | F | F | F |
| 0.58333333342100 | 0.13043999673400 | 0.66666666666600 | F | F | F |
| 0.91666666675500 | 0.13043999673400 | 0.00000000000000 | F | F | F |
| 0.91666666675500 | 0.13043999673400 | 0.33333333333400 | F | F | F |
| 0.91666666675500 | 0.13043999673400 | 0.66666666666600 | F | F | F |
| 0.25000000008900 | 0.13043999673400 | 0.22222334138000 | F | F | F |
| 0.25000000008900 | 0.13043999673400 | 0.55555667471300 | F | F | F |
| 0.25000000008900 | 0.13043999673400 | 0.88889000804700 | F | F | F |
| 0.58333333342100 | 0.13043999673400 | 0.22222334138000 | F | F | F |
| 0.58333333342100 | 0.13043999673400 | 0.55555667471300 | F | F | F |
| 0.58333333342100 | 0.13043999673400 | 0.88889000804700 | F | F | F |
| 0.91666666675500 | 0.13043999673400 | 0.22222334138000 | F | F | F |
| 0.91666666675500 | 0.13043999673400 | 0.55555667471300 | F | F | F |
| 0.91666666675500 | 0.13043999673400 | 0.88889000804700 | F | F | F |
| 0.25000000008900 | 0.13043999673400 | 0.11111000180100 | F | F | F |
| 0.25000000008900 | 0.13043999673400 | 0.44444333513300 | F | F | F |
| 0.25000000008900 | 0.13043999673400 | 0.77777666846700 | F | F | F |
| 0.58333333342100 | 0.13043999673400 | 0.11111000180100 | F | F | F |
| 0.58333333342100 | 0.13043999673400 | 0.44444333513300 | F | F | F |
| 0.58333333342100 | 0.13043999673400 | 0.77777666846700 | F | F | F |
| 0.91666666675500 | 0.13043999673400 | 0.11111000180100 | F | F | F |
| 0.91666666675500 | 0.13043999673400 | 0.44444333513300 | F | F | F |
| 0.91666666675500 | 0.13043999673400 | 0.77777666846700 | F | F | F |



|                  |                  |                  |   |   |   |
|------------------|------------------|------------------|---|---|---|
| 0.04314605387150 | 0.19650823527000 | 0.05526732015910 | T | T | T |
| 0.04313211226550 | 0.19651266046600 | 0.38858098395100 | T | T | T |
| 0.04314824889560 | 0.19652262071500 | 0.72191671325200 | T | T | T |
| 0.37650080720600 | 0.19651949358700 | 0.05525665472090 | T | T | T |
| 0.37649922833700 | 0.19653783156600 | 0.38858628063400 | T | T | T |
| 0.37649881134500 | 0.19652955053400 | 0.72192371852100 | T | T | T |
| 0.70983473397000 | 0.19650607749200 | 0.05526505510880 | T | T | T |
| 0.70983761078000 | 0.19651936366400 | 0.38858555689300 | T | T | T |
| 0.70982572085500 | 0.19651313621000 | 0.72191481043700 | T | T | T |
| 0.04133004728360 | 0.19628347933500 | 0.27765336905100 | T | T | T |
| 0.04134855168630 | 0.19628904635600 | 0.61099298572800 | T | T | T |
| 0.04134130474030 | 0.19628715841100 | 0.94434314555100 | T | T | T |
| 0.37469616357200 | 0.19630574613200 | 0.27765506584500 | T | T | T |
| 0.37469832316700 | 0.19630739147500 | 0.61099984594900 | T | T | T |
| 0.37469942471100 | 0.19628949409900 | 0.94433207601600 | T | T | T |
| 0.70804257072300 | 0.19629440572700 | 0.27764292450100 | T | T | T |
| 0.70802302142100 | 0.19628794833100 | 0.61099703764400 | T | T | T |
| 0.70802435002800 | 0.19628728404100 | 0.94434115275800 | T | T | T |
| 0.04133123735430 | 0.19606595871200 | 0.16563747231000 | T | T | T |
| 0.04134159739000 | 0.19608345174900 | 0.49894959362100 | T | T | T |
| 0.04133922481470 | 0.19607446588600 | 0.83229478106000 | T | T | T |
| 0.37469228936900 | 0.19607907784300 | 0.16562552285600 | T | T | T |
| 0.37469580439800 | 0.19609766766800 | 0.49896759948700 | T | T | T |
| 0.37469608343600 | 0.19607905984900 | 0.83229873787000 | T | T | T |
| 0.70803655027400 | 0.19606982104900 | 0.16563359508200 | T | T | T |
| 0.70802978207100 | 0.19607689344000 | 0.49895997189700 | T | T | T |
| 0.70802078781000 | 0.19607270364300 | 0.83229534611700 | T | T | T |
| 0.20591059220100 | 0.19638970672100 | 0.05540635270010 | T | T | T |
| 0.20589979059000 | 0.19640851484800 | 0.38873482857500 | T | T | T |
| 0.20591433716200 | 0.19641023857900 | 0.72207421947000 | T | T | T |

|                  |                  |                  |   |   |   |
|------------------|------------------|------------------|---|---|---|
| 0.53928064915800 | 0.19639312224600 | 0.05540214725910 | T | T | T |
| 0.53926941979800 | 0.19640996366200 | 0.38874026820800 | T | T | T |
| 0.53926802634400 | 0.19639362738600 | 0.72207127740000 | T | T | T |
| 0.87258615800700 | 0.19638041522000 | 0.05541891066230 | T | T | T |
| 0.87258887805600 | 0.19638336326600 | 0.38873106153600 | T | T | T |
| 0.87258171374600 | 0.19639707979300 | 0.72207251818400 | T | T | T |
| 0.20793510007100 | 0.19646590880100 | 0.27751097800800 | T | T | T |
| 0.20794138707300 | 0.19647449282400 | 0.61084798456500 | T | T | T |
| 0.20794155158900 | 0.19645121428600 | 0.94418946807300 | T | T | T |
| 0.54129539968600 | 0.19647637887800 | 0.27750275278700 | T | T | T |
| 0.54128639424100 | 0.19646804813700 | 0.61085023401800 | T | T | T |
| 0.54128690751400 | 0.19645082342000 | 0.94418099672600 | T | T | T |
| 0.87461894276800 | 0.19643890011100 | 0.27750537645700 | T | T | T |
| 0.87461187130100 | 0.19645481237900 | 0.61084361963900 | T | T | T |
| 0.87461495848200 | 0.19644637370400 | 0.94419728338200 | T | T | T |
| 0.20803680577200 | 0.19572809713100 | 0.16556579780000 | T | T | T |
| 0.20803727818600 | 0.19574310472900 | 0.49890822562500 | T | T | T |
| 0.20804859507700 | 0.19573019871600 | 0.83223714495100 | T | T | T |
| 0.54140342409300 | 0.19573859646800 | 0.16556625639300 | T | T | T |
| 0.54139580647300 | 0.19573752924300 | 0.49891119334900 | T | T | T |
| 0.54139498892200 | 0.19572056464200 | 0.83223631338100 | T | T | T |
| 0.87471931431800 | 0.19571199201700 | 0.16558069530100 | T | T | T |
| 0.87472165595700 | 0.19573127398000 | 0.49889121374700 | T | T | T |
| 0.87471810446400 | 0.19572162015500 | 0.83223608178200 | T | T | T |
| 0.00041860020047 | 0.24456767402000 | 0.00908350901376 | T | T | T |
| 0.00040789051761 | 0.24456750607200 | 0.34240537245500 | T | T | T |
| 0.00041947674275 | 0.24459031550900 | 0.67574208999100 | T | T | T |
| 0.33376740448000 | 0.24459586826400 | 0.00906948564415 | T | T | T |
| 0.33376705030400 | 0.24461786240700 | 0.34240705502900 | T | T | T |
| 0.33377264608400 | 0.24459795580000 | 0.67573609644600 | T | T | T |

|                  |                  |                  |   |   |   |
|------------------|------------------|------------------|---|---|---|
| 0.66710605110600 | 0.24458983584100 | 0.00907409593248 | T | T | T |
| 0.66711141495200 | 0.24460536485600 | 0.34239044804000 | T | T | T |
| 0.66710247107000 | 0.24460292918200 | 0.67573478369500 | T | T | T |
| 0.33268572493600 | 0.24795875295000 | 0.22590105537500 | T | T | T |
| 0.33268502128600 | 0.24796391367900 | 0.55924429535200 | T | T | T |
| 0.33268910542300 | 0.24794171377900 | 0.89258071206000 | T | T | T |
| 0.66602145237300 | 0.24794085072000 | 0.22589969544700 | T | T | T |
| 0.66601989839000 | 0.24796346058800 | 0.55924024727500 | T | T | T |
| 0.66600633183400 | 0.24795158642700 | 0.89258207867200 | T | T | T |
| 0.99931231382900 | 0.24790791580800 | 0.22591032855700 | T | T | T |
| 0.99932490512900 | 0.24794784589000 | 0.55924128992000 | T | T | T |
| 0.99932048475400 | 0.24793634071200 | 0.89258426471800 | T | T | T |
| 0.00067482394074 | 0.24454829019300 | 0.11777012882100 | T | T | T |
| 0.00067458760553 | 0.24458450192000 | 0.45109308831300 | T | T | T |
| 0.00068583116418 | 0.24458194705500 | 0.78443904953800 | T | T | T |
| 0.33403339505000 | 0.24459275688300 | 0.11776284682400 | T | T | T |
| 0.33403075263400 | 0.24461736352600 | 0.45110144722300 | T | T | T |
| 0.33403600736000 | 0.24458996121600 | 0.78443971548500 | T | T | T |
| 0.66737082933400 | 0.24457369091100 | 0.11776231677900 | T | T | T |
| 0.66736916547100 | 0.24460834094100 | 0.45109470969300 | T | T | T |
| 0.66735813747900 | 0.24459451939600 | 0.78443664664500 | T | T | T |
| 0.16609137757700 | 0.24487630716400 | 0.00914657955164 | T | T | T |
| 0.16608554934400 | 0.24490182785600 | 0.34247403443000 | T | T | T |
| 0.16609749715200 | 0.24489597089700 | 0.67580651112000 | T | T | T |
| 0.49946545119200 | 0.24488737466900 | 0.00913504638331 | T | T | T |
| 0.49946502311000 | 0.24491457732600 | 0.34247026642000 | T | T | T |
| 0.49945792763600 | 0.24489128694900 | 0.67580846678900 | T | T | T |
| 0.83276919090200 | 0.24486405059300 | 0.00915303134332 | T | T | T |
| 0.83277563301400 | 0.24487107364600 | 0.34246740089800 | T | T | T |
| 0.83277044392700 | 0.24488976573600 | 0.67580873056100 | T | T | T |

|                  |                  |                  |   |   |   |
|------------------|------------------|------------------|---|---|---|
| 0.16553799057200 | 0.24772642438800 | 0.22577223600500 | T | T | T |
| 0.16554617839100 | 0.24774495905000 | 0.55910704300500 | T | T | T |
| 0.16554847619600 | 0.24772093831400 | 0.89245053065300 | T | T | T |
| 0.49890549676900 | 0.24773920385200 | 0.22576355727000 | T | T | T |
| 0.49890111105200 | 0.24773774575800 | 0.55910770649700 | T | T | T |
| 0.49890144973800 | 0.24771120024300 | 0.89244119104800 | T | T | T |
| 0.83222396686400 | 0.24768934638000 | 0.22577408614300 | T | T | T |
| 0.83222174986900 | 0.24772670651400 | 0.55910537749100 | T | T | T |
| 0.83222344498100 | 0.24770671843300 | 0.89245341796600 | T | T | T |
| 0.16311863908800 | 0.28270348760700 | 0.10282641206400 | T | T | T |
| 0.16311865710500 | 0.28272867264300 | 0.43615140675700 | T | T | T |
| 0.16313177097600 | 0.28272588773200 | 0.76950269735600 | T | T | T |
| 0.49648679012000 | 0.28273349290700 | 0.10282173145000 | T | T | T |
| 0.49648515387600 | 0.28274230883000 | 0.43616219706400 | T | T | T |
| 0.49648407121600 | 0.28272015873300 | 0.76950206429000 | T | T | T |
| 0.82981281854900 | 0.28269337484600 | 0.10283819189300 | T | T | T |
| 0.82981697769300 | 0.28271056208300 | 0.43615440937800 | T | T | T |
| 0.82981446766900 | 0.28271909349400 | 0.76950356690700 | T | T | T |
| 0.08356420727860 | 0.24460372667700 | 0.00904338058055 | T | T | T |
| 0.08355401303340 | 0.24462059693700 | 0.34237831055700 | T | T | T |
| 0.08357030751530 | 0.24462111665000 | 0.67569966613300 | T | T | T |
| 0.41692176398000 | 0.24461849518700 | 0.00902673299188 | T | T | T |
| 0.41692331844400 | 0.24464264957400 | 0.34237374400900 | T | T | T |
| 0.41691913984700 | 0.24461842920400 | 0.67569908555400 | T | T | T |
| 0.75024467421400 | 0.24460573778000 | 0.00904099106032 | T | T | T |
| 0.75025179582800 | 0.24462037565200 | 0.34236129364900 | T | T | T |
| 0.75023917878100 | 0.24462519169800 | 0.67569693188200 | T | T | T |
| 0.08301292940900 | 0.24216264700100 | 0.22823270200400 | T | T | T |
| 0.08302358020300 | 0.24219366144600 | 0.56156053312900 | T | T | T |
| 0.08302450161970 | 0.24215622159300 | 0.89490877251400 | T | T | T |

|                  |                  |                  |   |   |   |
|------------------|------------------|------------------|---|---|---|
| 0.41639211217500 | 0.24221035373700 | 0.22822729943000 | T | T | T |
| 0.41638662258300 | 0.24220563172900 | 0.56156883125000 | T | T | T |
| 0.41639293022100 | 0.24217750153400 | 0.89490478480600 | T | T | T |
| 0.74971549541200 | 0.24213258025800 | 0.22822914028800 | T | T | T |
| 0.74971078690500 | 0.24216949068600 | 0.56156695093300 | T | T | T |
| 0.74970681705600 | 0.24214523736800 | 0.89491165834700 | T | T | T |
| 0.08377823923310 | 0.24802670489900 | 0.12124845459500 | T | T | T |
| 0.08378172947270 | 0.24804447429100 | 0.45450651439700 | T | T | T |
| 0.08379487768250 | 0.24804313267200 | 0.78791854996200 | T | T | T |
| 0.41716067922400 | 0.24805500287400 | 0.12122829517800 | T | T | T |
| 0.41715839498800 | 0.24805335298800 | 0.45454079703100 | T | T | T |
| 0.41716080049000 | 0.24803728297100 | 0.78790718314600 | T | T | T |
| 0.75047173728900 | 0.24802708511000 | 0.12125120346200 | T | T | T |
| 0.75048105671400 | 0.24804858638200 | 0.45453857634600 | T | T | T |
| 0.75046946323700 | 0.24805282492200 | 0.78791657650200 | T | T | T |
| 0.24985378947500 | 0.24463141007700 | 0.00766987785658 | T | T | T |
| 0.24985231499600 | 0.24466510863000 | 0.34101242495900 | T | T | T |
| 0.24985844817100 | 0.24463906724600 | 0.67432935678500 | T | T | T |
| 0.58320542794100 | 0.24463335992700 | 0.00766146070467 | T | T | T |
| 0.58320790696900 | 0.24466029428300 | 0.34099435829700 | T | T | T |
| 0.58319845171600 | 0.24463834295900 | 0.67433119239900 | T | T | T |
| 0.91652506820800 | 0.24460773422200 | 0.00768133745378 | T | T | T |
| 0.91652457572400 | 0.24461438118200 | 0.34100530442300 | T | T | T |
| 0.91652661330800 | 0.24463313865700 | 0.67433416700700 | T | T | T |
| 0.24975582250200 | 0.24460580748700 | 0.22840388587700 | T | T | T |
| 0.24975889328800 | 0.24461305705900 | 0.56174755198500 | T | T | T |
| 0.24976164563400 | 0.24458634158100 | 0.89508286068400 | T | T | T |
| 0.58311244991400 | 0.24460284742800 | 0.22840346240400 | T | T | T |
| 0.58310564064100 | 0.24461823347100 | 0.56174760192800 | T | T | T |
| 0.58310159570400 | 0.24460282794300 | 0.89508534471100 | T | T | T |

|                  |                  |                  |   |   |   |
|------------------|------------------|------------------|---|---|---|
| 0.91641972034100 | 0.24455104444100 | 0.22840967710100 | T | T | T |
| 0.91642782295900 | 0.24459573149700 | 0.56174717213500 | T | T | T |
| 0.91642416137300 | 0.24457817163200 | 0.89508902585700 | T | T | T |
| 0.25215959441800 | 0.24462937534600 | 0.11772214163600 | T | T | T |
| 0.25216080101800 | 0.24465156137200 | 0.45104930888100 | T | T | T |
| 0.25216960471200 | 0.24462657288800 | 0.78439113635700 | T | T | T |
| 0.58551094700000 | 0.24463328468900 | 0.11772213315100 | T | T | T |
| 0.58550549582200 | 0.24465668910700 | 0.45105361165900 | T | T | T |
| 0.58550140794800 | 0.24463737803500 | 0.78439745139700 | T | T | T |
| 0.91882861524000 | 0.24459297846700 | 0.11773126656100 | T | T | T |
| 0.91883335032200 | 0.24461898647000 | 0.45104390700800 | T | T | T |
| 0.91883168192600 | 0.24462141952500 | 0.78439740661300 | T | T | T |
| 0.12484341003600 | 0.99514658522600 | 0.03216388314230 | T | T | T |
| 0.12485516619000 | 0.99512153343100 | 0.36549779081900 | T | T | T |
| 0.12484017409600 | 0.99511762397000 | 0.69883614058800 | T | T | T |
| 0.45824122026900 | 0.99513827270600 | 0.03214867310640 | T | T | T |
| 0.45823727828400 | 0.99512344574400 | 0.36549481205000 | T | T | T |
| 0.45823149385400 | 0.99513160253700 | 0.69883399334000 | T | T | T |
| 0.79153555168000 | 0.99516042342900 | 0.03215921970150 | T | T | T |
| 0.79154258895400 | 0.99514143744600 | 0.36549046338100 | T | T | T |
| 0.79154092807900 | 0.99513778634100 | 0.69882585745400 | T | T | T |
| 0.12441168630200 | 0.99852832109900 | 0.25110497892500 | T | T | T |
| 0.12441079186600 | 0.99851006684600 | 0.58445193598300 | T | T | T |
| 0.12441430307400 | 0.99851373195800 | 0.91779245127300 | T | T | T |
| 0.45780758234500 | 0.99852352887800 | 0.25111191834200 | T | T | T |
| 0.45779761655500 | 0.99852153855600 | 0.58445686298900 | T | T | T |
| 0.45781957530300 | 0.99853344121600 | 0.91778783985800 | T | T | T |
| 0.79110634484600 | 0.99852657577300 | 0.25110244671300 | T | T | T |
| 0.79111507493600 | 0.99852197462800 | 0.58445666838200 | T | T | T |
| 0.79110679684000 | 0.99851297793900 | 0.91779380684700 | T | T | T |

|                  |                  |                  |   |   |   |
|------------------|------------------|------------------|---|---|---|
| 0.12601629125300 | 0.99505472962400 | 0.14207267317600 | T | T | T |
| 0.12597238712100 | 0.99503874022400 | 0.47534014076500 | T | T | T |
| 0.12603546798800 | 0.99503360415900 | 0.80876335334000 | T | T | T |
| 0.45939045849900 | 0.99504053854900 | 0.14204774588100 | T | T | T |
| 0.45935664130800 | 0.99504489302500 | 0.47535364624300 | T | T | T |
| 0.45940115906000 | 0.99504696280400 | 0.80874645963300 | T | T | T |
| 0.79268585839000 | 0.99506397357000 | 0.14205235317900 | T | T | T |
| 0.79266266281300 | 0.99505962359400 | 0.47535609284900 | T | T | T |
| 0.79269464074300 | 0.99505231925900 | 0.80873794193000 | T | T | T |
| 0.29151584097900 | 0.99519334929400 | 0.03091949453740 | T | T | T |
| 0.29152087113100 | 0.99517236321600 | 0.36426736416500 | T | T | T |
| 0.29152658068700 | 0.99517231645900 | 0.69759150405300 | T | T | T |
| 0.62487179977200 | 0.99520742385600 | 0.03091514545560 | T | T | T |
| 0.62487457103900 | 0.99518364209600 | 0.36425322361400 | T | T | T |
| 0.62486919484200 | 0.99519379278100 | 0.69759936025900 | T | T | T |
| 0.95817882750400 | 0.99521692691100 | 0.03092380353810 | T | T | T |
| 0.95817687295800 | 0.99520109503200 | 0.36425887848800 | T | T | T |
| 0.95816727260300 | 0.99518833842100 | 0.69758393474500 | T | T | T |
| 0.29154213596400 | 0.99616665926100 | 0.25122202045000 | T | T | T |
| 0.29154858603600 | 0.99615206244600 | 0.58456413977800 | T | T | T |
| 0.29154126383300 | 0.99616754097200 | 0.91789062699500 | T | T | T |
| 0.62489847024900 | 0.99615993709500 | 0.25121891546500 | T | T | T |
| 0.62489714972700 | 0.99615270770900 | 0.58457426439300 | T | T | T |
| 0.62488923273200 | 0.99616713055400 | 0.91790538302700 | T | T | T |
| 0.95818309175800 | 0.99619369109500 | 0.25121753868500 | T | T | T |
| 0.95818892632700 | 0.99616041226800 | 0.58456842128500 | T | T | T |
| 0.95818858247300 | 0.99617407501200 | 0.91790880389900 | T | T | T |
| 0.29280710022200 | 0.99523591157700 | 0.14142251162100 | T | T | T |
| 0.29280492847700 | 0.99521858292400 | 0.47476301664400 | T | T | T |
| 0.29280964973200 | 0.99522317070900 | 0.80810684319200 | T | T | T |

|                  |                  |                  |   |   |   |
|------------------|------------------|------------------|---|---|---|
| 0.62615624142600 | 0.99524625017400 | 0.14142529821200 | T | T | T |
| 0.62614755023500 | 0.99523892274700 | 0.47477009616300 | T | T | T |
| 0.62614556314400 | 0.99524815226500 | 0.80812366255500 | T | T | T |
| 0.95945755386900 | 0.99526328983800 | 0.14142970656100 | T | T | T |
| 0.95945205106400 | 0.99524325614100 | 0.47476821628300 | T | T | T |
| 0.95945487402100 | 0.99523824871500 | 0.80811790207600 | T | T | T |
| 0.12500000000200 | 0.13043999673400 | 0.02777666599470 | F | F | F |
| 0.12500000000200 | 0.13043999673400 | 0.36110999932900 | F | F | F |
| 0.12500000000200 | 0.13043999673400 | 0.69444333266100 | F | F | F |
| 0.45833333333400 | 0.13043999673400 | 0.02777666599470 | F | F | F |
| 0.45833333333400 | 0.13043999673400 | 0.36110999932900 | F | F | F |
| 0.45833333333400 | 0.13043999673400 | 0.69444333266100 | F | F | F |
| 0.79166666666800 | 0.13043999673400 | 0.02777666599470 | F | F | F |
| 0.79166666666800 | 0.13043999673400 | 0.36110999932900 | F | F | F |
| 0.79166666666800 | 0.13043999673400 | 0.69444333266100 | F | F | F |
| 0.12500000000200 | 0.13043999673400 | 0.2499999994900  | F | F | F |
| 0.12500000000200 | 0.13043999673400 | 0.5833333328300  | F | F | F |
| 0.12500000000200 | 0.13043999673400 | 0.9166666661700  | F | F | F |
| 0.45833333333400 | 0.13043999673400 | 0.2499999994900  | F | F | F |
| 0.45833333333400 | 0.13043999673400 | 0.5833333328300  | F | F | F |
| 0.45833333333400 | 0.13043999673400 | 0.9166666661700  | F | F | F |
| 0.79166666666800 | 0.13043999673400 | 0.2499999994900  | F | F | F |
| 0.79166666666800 | 0.13043999673400 | 0.5833333328300  | F | F | F |
| 0.79166666666800 | 0.13043999673400 | 0.9166666661700  | F | F | F |
| 0.12500000000200 | 0.13043999673400 | 0.13888999819000 | F | F | F |
| 0.12500000000200 | 0.13043999673400 | 0.47222333152400 | F | F | F |
| 0.12500000000200 | 0.13043999673400 | 0.80555666485600 | F | F | F |
| 0.45833333333400 | 0.13043999673400 | 0.13888999819000 | F | F | F |
| 0.45833333333400 | 0.13043999673400 | 0.47222333152400 | F | F | F |
| 0.45833333333400 | 0.13043999673400 | 0.80555666485600 | F | F | F |



|                  |                  |                  |   |   |   |
|------------------|------------------|------------------|---|---|---|
| 0.79166666666800 | 0.13043999673400 | 0.13888999819000 | F | F | F |
| 0.79166666666800 | 0.13043999673400 | 0.47222333152400 | F | F | F |
| 0.79166666666800 | 0.13043999673400 | 0.80555666485600 | F | F | F |
| 0.29166666669900 | 0.13043999673400 | 0.02777666599470 | F | F | F |
| 0.29166666669900 | 0.13043999673400 | 0.36110999932900 | F | F | F |
| 0.29166666669900 | 0.13043999673400 | 0.69444333266100 | F | F | F |
| 0.62500000003100 | 0.13043999673400 | 0.02777666599470 | F | F | F |
| 0.62500000003100 | 0.13043999673400 | 0.36110999932900 | F | F | F |
| 0.62500000003100 | 0.13043999673400 | 0.69444333266100 | F | F | F |
| 0.95833333336500 | 0.13043999673400 | 0.02777666599470 | F | F | F |
| 0.95833333336500 | 0.13043999673400 | 0.36110999932900 | F | F | F |
| 0.95833333336500 | 0.13043999673400 | 0.69444333266100 | F | F | F |
| 0.29166666669900 | 0.13043999673400 | 0.24999999994900 | F | F | F |
| 0.29166666669900 | 0.13043999673400 | 0.58333333328300 | F | F | F |
| 0.29166666669900 | 0.13043999673400 | 0.91666666617000 | F | F | F |
| 0.62500000003100 | 0.13043999673400 | 0.24999999994900 | F | F | F |
| 0.62500000003100 | 0.13043999673400 | 0.58333333328300 | F | F | F |
| 0.62500000003100 | 0.13043999673400 | 0.91666666617000 | F | F | F |
| 0.95833333336500 | 0.13043999673400 | 0.24999999994900 | F | F | F |
| 0.95833333336500 | 0.13043999673400 | 0.58333333328300 | F | F | F |
| 0.95833333336500 | 0.13043999673400 | 0.91666666617000 | F | F | F |
| 0.29166666669900 | 0.13043999673400 | 0.13888999819000 | F | F | F |
| 0.29166666669900 | 0.13043999673400 | 0.47222333152400 | F | F | F |
| 0.29166666669900 | 0.13043999673400 | 0.80555666485600 | F | F | F |
| 0.62500000003100 | 0.13043999673400 | 0.13888999819000 | F | F | F |
| 0.62500000003100 | 0.13043999673400 | 0.47222333152400 | F | F | F |
| 0.62500000003100 | 0.13043999673400 | 0.80555666485600 | F | F | F |
| 0.95833333336500 | 0.13043999673400 | 0.13888999819000 | F | F | F |
| 0.95833333336500 | 0.13043999673400 | 0.47222333152400 | F | F | F |
| 0.95833333336500 | 0.13043999673400 | 0.80555666485600 | F | F | F |

|                  |                  |                  |   |   |   |
|------------------|------------------|------------------|---|---|---|
| 0.12487225652800 | 0.26547180224800 | 0.03212427724140 | T | T | T |
| 0.12487852252900 | 0.26549490331700 | 0.36545389904100 | T | T | T |
| 0.12487384318600 | 0.26550267799100 | 0.69878871041700 | T | T | T |
| 0.45825742427600 | 0.26548221845800 | 0.03211055090390 | T | T | T |
| 0.45825346598800 | 0.26549797877200 | 0.36545423379700 | T | T | T |
| 0.45824844463900 | 0.26549159128800 | 0.69878932726400 | T | T | T |
| 0.79155202635100 | 0.26545790781100 | 0.03212185042800 | T | T | T |
| 0.79155827069000 | 0.26547617345400 | 0.36544957092200 | T | T | T |
| 0.79155963800200 | 0.26547590910400 | 0.69878412995100 | T | T | T |
| 0.12436062193700 | 0.26325901184600 | 0.25134422478300 | T | T | T |
| 0.12436296549800 | 0.26327160813700 | 0.58468827883800 | T | T | T |
| 0.12436300115900 | 0.26325949936400 | 0.91802769869000 | T | T | T |
| 0.45775147486400 | 0.26326137988000 | 0.25135098782600 | T | T | T |
| 0.45774202234900 | 0.26326081222200 | 0.58469215320700 | T | T | T |
| 0.45776060031000 | 0.26324473374300 | 0.91802140531700 | T | T | T |
| 0.79104918281900 | 0.26324563846600 | 0.25134062420100 | T | T | T |
| 0.79105783807500 | 0.26325281506100 | 0.58468890424200 | T | T | T |
| 0.79104820134200 | 0.26324504426800 | 0.91802755729500 | T | T | T |
| 0.12594703310900 | 0.26638669627400 | 0.14212956751200 | T | T | T |
| 0.12593501936700 | 0.26644138277600 | 0.47543914871100 | T | T | T |
| 0.12596231537300 | 0.26639345238200 | 0.80881003511600 | T | T | T |
| 0.45933240257400 | 0.26643094134100 | 0.14212631928000 | T | T | T |
| 0.45931818043000 | 0.26642927499900 | 0.47545665179500 | T | T | T |
| 0.45933544613300 | 0.26641102123500 | 0.80880485752800 | T | T | T |
| 0.79263476268300 | 0.26636476748100 | 0.14213769239900 | T | T | T |
| 0.79263609780800 | 0.26638594117700 | 0.47546410956800 | T | T | T |
| 0.79263966704200 | 0.26638388333100 | 0.80881086933900 | T | T | T |
| 0.29150542158900 | 0.26546498243800 | 0.03090182631150 | T | T | T |
| 0.29151126155000 | 0.26548069899100 | 0.36424667599100 | T | T | T |
| 0.29151548083400 | 0.26548207269200 | 0.69757218896300 | T | T | T |

|                  |                  |                  |   |   |   |
|------------------|------------------|------------------|---|---|---|
| 0.62485633304900 | 0.26544494870800 | 0.03090173619450 | T | T | T |
| 0.62486066577400 | 0.26546823585100 | 0.36423664813700 | T | T | T |
| 0.62485385095800 | 0.26545118214700 | 0.69758318813400 | T | T | T |
| 0.95816906161400 | 0.26543281443600 | 0.03090938715940 | T | T | T |
| 0.95817067250300 | 0.26545190501800 | 0.36423863939700 | T | T | T |
| 0.95816067829500 | 0.26545638110100 | 0.69756926679100 | T | T | T |
| 0.29146181738200 | 0.26486592381200 | 0.25102889719100 | T | T | T |
| 0.29146928516500 | 0.26488393407800 | 0.58437551921000 | T | T | T |
| 0.29146553507100 | 0.26486857847300 | 0.91770518577000 | T | T | T |
| 0.62481188397100 | 0.26486297651300 | 0.25103067800300 | T | T | T |
| 0.62480996248700 | 0.26486419990300 | 0.58438121097200 | T | T | T |
| 0.62480500974700 | 0.26485993162900 | 0.91771942226100 | T | T | T |
| 0.95810669002800 | 0.26484041293100 | 0.25102517618800 | T | T | T |
| 0.95811073979300 | 0.26486578513000 | 0.58437485948300 | T | T | T |
| 0.95811032560200 | 0.26485368397100 | 0.91771920067200 | T | T | T |
| 0.29282355335200 | 0.26555540734400 | 0.14139720948100 | T | T | T |
| 0.29282180427700 | 0.26556963389200 | 0.47474171764500 | T | T | T |
| 0.29282606552600 | 0.26556270740500 | 0.80808265005600 | T | T | T |
| 0.62617216785500 | 0.26555039258600 | 0.14140154390000 | T | T | T |
| 0.62616443975200 | 0.26555644379800 | 0.47474532588900 | T | T | T |
| 0.62616374237400 | 0.26554501401600 | 0.80809615360600 | T | T | T |
| 0.95948026606600 | 0.26552433857600 | 0.14140011080500 | T | T | T |
| 0.95947257010300 | 0.26554854159000 | 0.47473688849500 | T | T | T |
| 0.95947551714900 | 0.26554570783900 | 0.80808963339800 | T | T | T |
| 0.04191839741830 | 0.99484084895800 | 0.03162043319050 | T | T | T |
| 0.04191245615310 | 0.99480832838300 | 0.36494703038000 | T | T | T |
| 0.04190929801030 | 0.99480943538100 | 0.69828323723800 | T | T | T |
| 0.37528889833200 | 0.99481026669500 | 0.03160429061640 | T | T | T |
| 0.37528190354600 | 0.99478914152200 | 0.36494748824900 | T | T | T |
| 0.37529202220800 | 0.99480090066600 | 0.69828352209000 | T | T | T |

|                  |                  |                  |   |   |   |
|------------------|------------------|------------------|---|---|---|
| 0.70860887609800 | 0.99483479635900 | 0.03161522671590 | T | T | T |
| 0.70861209833000 | 0.99480679546500 | 0.36494215603300 | T | T | T |
| 0.70861329315500 | 0.99481699526500 | 0.69828864539600 | T | T | T |
| 0.04111173489590 | 0.99711604035100 | 0.25095077905400 | T | T | T |
| 0.04111272581540 | 0.99708026091800 | 0.58430031652100 | T | T | T |
| 0.04111049770260 | 0.99710741884800 | 0.91764168891400 | T | T | T |
| 0.37449190129200 | 0.99707575004300 | 0.25095815358200 | T | T | T |
| 0.37449765205400 | 0.99706428383300 | 0.58429906342100 | T | T | T |
| 0.37450290199100 | 0.99708219717700 | 0.91763074435500 | T | T | T |
| 0.70781558436800 | 0.99710884978400 | 0.25095082392500 | T | T | T |
| 0.70782018868700 | 0.99707741744100 | 0.58430276734000 | T | T | T |
| 0.70780234991300 | 0.99710425110400 | 0.91763895534300 | T | T | T |
| 0.04044837621010 | 0.99500474004300 | 0.14246516574900 | T | T | T |
| 0.04051144312310 | 0.99500499623100 | 0.47573383241900 | T | T | T |
| 0.04044509957300 | 0.99497737641500 | 0.80916359472100 | T | T | T |
| 0.37384651077300 | 0.99498136187800 | 0.14243959869000 | T | T | T |
| 0.37388234547200 | 0.99498926131500 | 0.47574239197500 | T | T | T |
| 0.37384223775600 | 0.99497736585000 | 0.80913094807700 | T | T | T |
| 0.70716881731800 | 0.99501797305000 | 0.14244016703800 | T | T | T |
| 0.70721108894100 | 0.99501362768400 | 0.47573660928900 | T | T | T |
| 0.70716026275400 | 0.99500402515600 | 0.80913293290500 | T | T | T |
| 0.20835625185300 | 0.99513833209600 | 0.03092570705470 | T | T | T |
| 0.20835305896000 | 0.99511052964100 | 0.36426627865400 | T | T | T |
| 0.20836148207800 | 0.99511226809300 | 0.69760103904800 | T | T | T |
| 0.54174627765500 | 0.99513067404600 | 0.03092114738550 | T | T | T |
| 0.54174069750200 | 0.99511309133200 | 0.36426708711600 | T | T | T |
| 0.54173404040600 | 0.99512828945400 | 0.69760842016600 | T | T | T |
| 0.87504080096400 | 0.99515611088600 | 0.03092763003810 | T | T | T |
| 0.87503371146300 | 0.99514025425500 | 0.36425927758400 | T | T | T |
| 0.87503897762100 | 0.99512903040900 | 0.69759314483400 | T | T | T |

|                  |                  |                  |   |   |   |
|------------------|------------------|------------------|---|---|---|
| 0.20706870037000 | 0.99702546095900 | 0.25095297035000 | T | T | T |
| 0.20706775991000 | 0.99699720872400 | 0.58430361010700 | T | T | T |
| 0.20707107345500 | 0.99702945717200 | 0.91763131994900 | T | T | T |
| 0.54044087288500 | 0.99700816440800 | 0.25095679544300 | T | T | T |
| 0.54042732074100 | 0.99699849622200 | 0.58430997197800 | T | T | T |
| 0.54044497259000 | 0.99701632070800 | 0.91763364367400 | T | T | T |
| 0.87374814462200 | 0.99706126320500 | 0.25094680031700 | T | T | T |
| 0.87374061302000 | 0.99701300192000 | 0.58430565624600 | T | T | T |
| 0.87374509795700 | 0.99704076874300 | 0.91763384371600 | T | T | T |
| 0.20713346470700 | 0.00314160637714 | 0.13680899837700 | T | T | T |
| 0.20713165280200 | 0.00312261993925 | 0.47012406816500 | T | T | T |
| 0.20713264413600 | 0.00315042318039 | 0.80348732847400 | T | T | T |
| 0.54049458152200 | 0.00314893576631 | 0.13681889365800 | T | T | T |
| 0.54048337437800 | 0.00312081776567 | 0.47012510758300 | T | T | T |
| 0.54048801860400 | 0.00317463474614 | 0.80350427457800 | T | T | T |
| 0.87381579065000 | 0.00316745873482 | 0.13682644053200 | T | T | T |
| 0.87380881026100 | 0.00315207656165 | 0.47014747741500 | T | T | T |
| 0.87380786513600 | 0.00316426120431 | 0.80351113720500 | T | T | T |
| 0.00052739212695 | 0.06700536872900 | 0.08243486479740 | T | T | T |
| 0.00052462715479 | 0.06698480252590 | 0.41575746666900 | T | T | T |
| 0.00052293825730 | 0.06698240434500 | 0.74910238119500 | T | T | T |
| 0.33387271196500 | 0.06698156648360 | 0.08242499713900 | T | T | T |
| 0.33387722564200 | 0.06697752658940 | 0.41576376753800 | T | T | T |
| 0.33388089673100 | 0.06697806974070 | 0.74910094105900 | T | T | T |
| 0.66722257411400 | 0.06700487374120 | 0.08242596699420 | T | T | T |
| 0.66721978043800 | 0.06698421271040 | 0.41575273681200 | T | T | T |
| 0.66721533857200 | 0.06698940616550 | 0.74910345882700 | T | T | T |
| 0.33319560402600 | 0.06564292891850 | 0.30543148665700 | T | T | T |
| 0.33321361186400 | 0.06564265574910 | 0.63877077808700 | T | T | T |
| 0.33320480701000 | 0.06564477486460 | 0.97209725855400 | T | T | T |

|                  |                  |                  |   |   |   |
|------------------|------------------|------------------|---|---|---|
| 0.66654449442700 | 0.06565808398400 | 0.30541435339600 | T | T | T |
| 0.66653890084700 | 0.06565449761570 | 0.63876919995500 | T | T | T |
| 0.66653149866900 | 0.06566312126180 | 0.97209744286300 | T | T | T |
| 0.99984043199000 | 0.06565651783220 | 0.30542090655400 | T | T | T |
| 0.99983661665900 | 0.06565714506860 | 0.63876706593200 | T | T | T |
| 0.99983935363400 | 0.06566097968800 | 0.97210255265600 | T | T | T |
| 0.33318289351400 | 0.06808869362780 | 0.19337727951000 | T | T | T |
| 0.33319907562000 | 0.06808028000460 | 0.52671039525600 | T | T | T |
| 0.33319434020800 | 0.06808967435050 | 0.86005502333700 | T | T | T |
| 0.66653320155400 | 0.06811567485590 | 0.19337306940300 | T | T | T |
| 0.66653258288400 | 0.06809802332830 | 0.52670253281700 | T | T | T |
| 0.66651784320500 | 0.06811784127180 | 0.86005268814200 | T | T | T |
| 0.99982128684000 | 0.06811217278370 | 0.19338431309600 | T | T | T |
| 0.99983122937400 | 0.06809307296400 | 0.52670614914500 | T | T | T |
| 0.99982122410500 | 0.06810848007330 | 0.86005851014300 | T | T | T |
| 0.16718201423200 | 0.06317492443420 | 0.08585128635730 | T | T | T |
| 0.16720573959200 | 0.06315893566320 | 0.41918993793000 | T | T | T |
| 0.16718596732900 | 0.06315491203590 | 0.75252898230700 | T | T | T |
| 0.50058345061000 | 0.06316107059590 | 0.08585803663080 | T | T | T |
| 0.50058368369700 | 0.06315410244860 | 0.41919918621400 | T | T | T |
| 0.50057128090300 | 0.06315948598980 | 0.75254130950200 | T | T | T |
| 0.83388334407200 | 0.06317579961120 | 0.08586148148620 | T | T | T |
| 0.83388752220800 | 0.06315702665700 | 0.41918954157000 | T | T | T |
| 0.83388129248100 | 0.06315359674960 | 0.75254107145900 | T | T | T |
| 0.16644945797600 | 0.06560618280740 | 0.30564214667000 | T | T | T |
| 0.16645363381800 | 0.06559546976540 | 0.63898671670700 | T | T | T |
| 0.16645110894100 | 0.06560666622300 | 0.97231948218200 | T | T | T |
| 0.49984355845100 | 0.06560068483320 | 0.30564713531500 | T | T | T |
| 0.49982964304200 | 0.06560335525680 | 0.63899642837900 | T | T | T |
| 0.49984952695400 | 0.06561058124320 | 0.97231854692500 | T | T | T |

|                  |                  |                  |   |   |   |
|------------------|------------------|------------------|---|---|---|
| 0.83313938203400 | 0.06561187449620 | 0.30563278041500 | T | T | T |
| 0.83314214315000 | 0.06561316174770 | 0.63898904956300 | T | T | T |
| 0.83313856720600 | 0.06561276661570 | 0.97231982869600 | T | T | T |
| 0.16623269879800 | 0.06879229318610 | 0.19266254512900 | T | T | T |
| 0.16623730065500 | 0.06876745530680 | 0.52598847356600 | T | T | T |
| 0.16623481353100 | 0.06878509899900 | 0.85934499909000 | T | T | T |
| 0.49962983181300 | 0.06878901022090 | 0.19265595749800 | T | T | T |
| 0.49960825907700 | 0.06877209094630 | 0.52598818000600 | T | T | T |
| 0.49962358799800 | 0.06879189858350 | 0.85933465966000 | T | T | T |
| 0.83291948079000 | 0.06880045107410 | 0.19266389061400 | T | T | T |
| 0.83291869540900 | 0.06878468341780 | 0.52599275507800 | T | T | T |
| 0.83291549711700 | 0.06879232458580 | 0.85934255817700 | T | T | T |
| 0.08388890249190 | 0.06475583579400 | 0.08445525522260 | T | T | T |
| 0.08390628693680 | 0.06482905980020 | 0.41768537427700 | T | T | T |
| 0.08388241037320 | 0.06472340997150 | 0.75113781049800 | T | T | T |
| 0.41728323969000 | 0.06476709304820 | 0.08440553530280 | T | T | T |
| 0.41728234058000 | 0.06481645833880 | 0.41769345278200 | T | T | T |
| 0.41727508554000 | 0.06475287389180 | 0.75110223966100 | T | T | T |
| 0.75059497354200 | 0.06479172202610 | 0.08441375339860 | T | T | T |
| 0.75060565373800 | 0.06483353789370 | 0.41768335703600 | T | T | T |
| 0.75059535626400 | 0.06477143155200 | 0.75109457410600 | T | T | T |
| 0.08322513608880 | 0.06555986519180 | 0.30532149470800 | T | T | T |
| 0.08322095327380 | 0.06555879380300 | 0.63865702157100 | T | T | T |
| 0.08322445615570 | 0.06556664782610 | 0.97199267733100 | T | T | T |
| 0.41660191189300 | 0.06555468093930 | 0.30532060143400 | T | T | T |
| 0.41660696168900 | 0.06555798374520 | 0.63866105018600 | T | T | T |
| 0.41661348149200 | 0.06556074853920 | 0.97198022811100 | T | T | T |
| 0.74992228733500 | 0.06556666079720 | 0.30531142339500 | T | T | T |
| 0.74992440594500 | 0.06556785460860 | 0.63865767821800 | T | T | T |
| 0.74991493267800 | 0.06556959365490 | 0.97198974674900 | T | T | T |

|                  |                  |                  |   |   |   |
|------------------|------------------|------------------|---|---|---|
| 0.08351469952830 | 0.06826482538810 | 0.19272124990200 | T | T | T |
| 0.08352287605780 | 0.06823706306030 | 0.52605564414000 | T | T | T |
| 0.08352422993120 | 0.06824665683200 | 0.85939975089600 | T | T | T |
| 0.41689520634200 | 0.06824459601060 | 0.19271660963800 | T | T | T |
| 0.41689494688300 | 0.06823802260060 | 0.52605843331200 | T | T | T |
| 0.41690056674500 | 0.06824516453960 | 0.85939566962200 | T | T | T |
| 0.75021661308200 | 0.06826567716350 | 0.19271977943400 | T | T | T |
| 0.75021852416100 | 0.06823975727170 | 0.52605636580700 | T | T | T |
| 0.75020999011200 | 0.06824875685910 | 0.85940158968200 | T | T | T |
| 0.24988109127700 | 0.06688471392750 | 0.08237479953310 | T | T | T |
| 0.24988961154400 | 0.06688304069880 | 0.41570474202200 | T | T | T |
| 0.24988969627300 | 0.06687655448820 | 0.74904782072900 | T | T | T |
| 0.58325003857300 | 0.06688545719990 | 0.08237695919350 | T | T | T |
| 0.58324648563200 | 0.06688038471780 | 0.41570228088900 | T | T | T |
| 0.58323614845900 | 0.06688102634250 | 0.74905453039100 | T | T | T |
| 0.91655922983300 | 0.06689796752950 | 0.08238003331810 | T | T | T |
| 0.91655757140900 | 0.06688595934750 | 0.41569856665200 | T | T | T |
| 0.91655156910400 | 0.06687884282180 | 0.74905147225600 | T | T | T |
| 0.25026828335400 | 0.06593040702060 | 0.30459474754100 | T | T | T |
| 0.25027601837200 | 0.06593468078760 | 0.63792885418300 | T | T | T |
| 0.25026833519800 | 0.06594366897010 | 0.97125653888100 | T | T | T |
| 0.58363684923300 | 0.06594707423010 | 0.30457959471500 | T | T | T |
| 0.58362617051700 | 0.06594737243780 | 0.63792994700300 | T | T | T |
| 0.58363031660800 | 0.06595809558710 | 0.97125216519100 | T | T | T |
| 0.91694026431000 | 0.06594574210720 | 0.30458138520300 | T | T | T |
| 0.91693547389900 | 0.06595460793940 | 0.63792155054800 | T | T | T |
| 0.91693769238700 | 0.06595664965030 | 0.97126071554900 | T | T | T |
| 0.25014691583400 | 0.06734114946610 | 0.19337909287800 | T | T | T |
| 0.25015477423700 | 0.06732949407040 | 0.52671823415100 | T | T | T |
| 0.25015702468200 | 0.06734419212380 | 0.86004939735800 | T | T | T |



|                  |                  |                  |   |   |   |
|------------------|------------------|------------------|---|---|---|
| 0.58352745504300 | 0.06734714732760 | 0.19338549345900 | T | T | T |
| 0.58351069331000 | 0.06732668843980 | 0.52672181367100 | T | T | T |
| 0.58351602249200 | 0.06734836040710 | 0.86006428701300 | T | T | T |
| 0.91681727334800 | 0.06735955151750 | 0.19338659506600 | T | T | T |
| 0.91681633711700 | 0.06733377674000 | 0.52672227620000 | T | T | T |
| 0.91681548505300 | 0.06734898452350 | 0.86005667964400 | T | T | T |
| 0.04166666667330 | 0.13043999673400 | 0.02777666599470 | F | F | F |
| 0.04166666667330 | 0.13043999673400 | 0.36110999932900 | F | F | F |
| 0.04166666667330 | 0.13043999673400 | 0.69444333266100 | F | F | F |
| 0.37500000000700 | 0.13043999673400 | 0.02777666599470 | F | F | F |
| 0.37500000000700 | 0.13043999673400 | 0.36110999932900 | F | F | F |
| 0.37500000000700 | 0.13043999673400 | 0.69444333266100 | F | F | F |
| 0.70833333334100 | 0.13043999673400 | 0.02777666599470 | F | F | F |
| 0.70833333334100 | 0.13043999673400 | 0.36110999932900 | F | F | F |
| 0.70833333334100 | 0.13043999673400 | 0.69444333266100 | F | F | F |
| 0.04166666667330 | 0.13043999673400 | 0.24999999994900 | F | F | F |
| 0.04166666667330 | 0.13043999673400 | 0.58333333328300 | F | F | F |
| 0.04166666667330 | 0.13043999673400 | 0.91666666617000 | F | F | F |
| 0.37500000000700 | 0.13043999673400 | 0.24999999994900 | F | F | F |
| 0.37500000000700 | 0.13043999673400 | 0.58333333328300 | F | F | F |
| 0.37500000000700 | 0.13043999673400 | 0.91666666617000 | F | F | F |
| 0.70833333334100 | 0.13043999673400 | 0.24999999994900 | F | F | F |
| 0.70833333334100 | 0.13043999673400 | 0.58333333328300 | F | F | F |
| 0.70833333334100 | 0.13043999673400 | 0.91666666617000 | F | F | F |
| 0.04166666667330 | 0.13043999673400 | 0.13888999819000 | F | F | F |
| 0.04166666667330 | 0.13043999673400 | 0.47222333152400 | F | F | F |
| 0.04166666667330 | 0.13043999673400 | 0.80555666485600 | F | F | F |
| 0.37500000000700 | 0.13043999673400 | 0.13888999819000 | F | F | F |
| 0.37500000000700 | 0.13043999673400 | 0.47222333152400 | F | F | F |
| 0.37500000000700 | 0.13043999673400 | 0.80555666485600 | F | F | F |

|                  |                  |                  |   |   |   |
|------------------|------------------|------------------|---|---|---|
| 0.70833333334100 | 0.13043999673400 | 0.13888999819000 | F | F | F |
| 0.70833333334100 | 0.13043999673400 | 0.47222333152400 | F | F | F |
| 0.70833333334100 | 0.13043999673400 | 0.80555666485600 | F | F | F |
| 0.20833333332800 | 0.13043999673400 | 0.02777666599470 | F | F | F |
| 0.20833333332800 | 0.13043999673400 | 0.36110999932900 | F | F | F |
| 0.20833333332800 | 0.13043999673400 | 0.69444333266100 | F | F | F |
| 0.54166666666100 | 0.13043999673400 | 0.02777666599470 | F | F | F |
| 0.54166666666100 | 0.13043999673400 | 0.36110999932900 | F | F | F |
| 0.54166666666100 | 0.13043999673400 | 0.69444333266100 | F | F | F |
| 0.8749999999500  | 0.13043999673400 | 0.02777666599470 | F | F | F |
| 0.8749999999500  | 0.13043999673400 | 0.36110999932900 | F | F | F |
| 0.8749999999500  | 0.13043999673400 | 0.69444333266100 | F | F | F |
| 0.20833333332800 | 0.13043999673400 | 0.2499999994900  | F | F | F |
| 0.20833333332800 | 0.13043999673400 | 0.5833333328300  | F | F | F |
| 0.20833333332800 | 0.13043999673400 | 0.9166666661700  | F | F | F |
| 0.54166666666100 | 0.13043999673400 | 0.2499999994900  | F | F | F |
| 0.54166666666100 | 0.13043999673400 | 0.5833333328300  | F | F | F |
| 0.54166666666100 | 0.13043999673400 | 0.9166666661700  | F | F | F |
| 0.8749999999500  | 0.13043999673400 | 0.2499999994900  | F | F | F |
| 0.8749999999500  | 0.13043999673400 | 0.5833333328300  | F | F | F |
| 0.8749999999500  | 0.13043999673400 | 0.9166666661700  | F | F | F |
| 0.20833333332800 | 0.13043999673400 | 0.13888999819000 | F | F | F |
| 0.20833333332800 | 0.13043999673400 | 0.47222333152400 | F | F | F |
| 0.20833333332800 | 0.13043999673400 | 0.80555666485600 | F | F | F |
| 0.54166666666100 | 0.13043999673400 | 0.13888999819000 | F | F | F |
| 0.54166666666100 | 0.13043999673400 | 0.47222333152400 | F | F | F |
| 0.54166666666100 | 0.13043999673400 | 0.80555666485600 | F | F | F |
| 0.8749999999500  | 0.13043999673400 | 0.13888999819000 | F | F | F |
| 0.8749999999500  | 0.13043999673400 | 0.47222333152400 | F | F | F |
| 0.8749999999500  | 0.13043999673400 | 0.80555666485600 | F | F | F |

|                  |                  |                  |   |   |   |
|------------------|------------------|------------------|---|---|---|
| 0.00054824666358 | 0.19385870642700 | 0.08240501817110 | T | T | T |
| 0.00054680192911 | 0.19388213986800 | 0.41572672801800 | T | T | T |
| 0.00054487937108 | 0.19388156977700 | 0.74907247588200 | T | T | T |
| 0.33389827848400 | 0.19388482481400 | 0.08239723257980 | T | T | T |
| 0.33390074770100 | 0.19389258262000 | 0.41573633628400 | T | T | T |
| 0.33390593677700 | 0.19389173357600 | 0.74907263663600 | T | T | T |
| 0.66724031337400 | 0.19386420446900 | 0.08240071144970 | T | T | T |
| 0.66723955470600 | 0.19388972016200 | 0.41572467991100 | T | T | T |
| 0.66723568527000 | 0.19388042611500 | 0.74907511644300 | T | T | T |
| 0.33314722054700 | 0.19528178940500 | 0.30531092141100 | T | T | T |
| 0.33316625169900 | 0.19528213349300 | 0.63865005952800 | T | T | T |
| 0.33315807820500 | 0.19527829305700 | 0.97197700715000 | T | T | T |
| 0.66649808421100 | 0.19527164675700 | 0.30529496283800 | T | T | T |
| 0.66649158875000 | 0.19527809809600 | 0.63865232930500 | T | T | T |
| 0.66648710392300 | 0.19526210479500 | 0.97198208745400 | T | T | T |
| 0.99979974009900 | 0.19526717581800 | 0.30530227365500 | T | T | T |
| 0.99979487686100 | 0.19527434416000 | 0.63864853650600 | T | T | T |
| 0.99979811418700 | 0.19526121070200 | 0.97198517991600 | T | T | T |
| 0.33319919952900 | 0.19283489491000 | 0.19337759452900 | T | T | T |
| 0.33321337215800 | 0.19284438176600 | 0.52671400597300 | T | T | T |
| 0.33321075725000 | 0.19283466757700 | 0.86005248481500 | T | T | T |
| 0.66655001756200 | 0.19282111789400 | 0.19337938588700 | T | T | T |
| 0.66654690019200 | 0.19284172163700 | 0.52671324760500 | T | T | T |
| 0.66653662688500 | 0.19282384970100 | 0.86005985819600 | T | T | T |
| 0.99984625254900 | 0.19280964024900 | 0.19338122157200 | T | T | T |
| 0.99984904061100 | 0.19283699410500 | 0.52671106421500 | T | T | T |
| 0.99984301382400 | 0.19282490805900 | 0.86005656299100 | T | T | T |
| 0.16727255587700 | 0.19849414632400 | 0.08612746185510 | T | T | T |
| 0.16728177537400 | 0.19850922125900 | 0.41946176087900 | T | T | T |
| 0.16728178016000 | 0.19851681089300 | 0.75281293629100 | T | T | T |

|                  |                  |                  |   |   |   |
|------------------|------------------|------------------|---|---|---|
| 0.50066672199300 | 0.19851298167700 | 0.08613545360590 | T | T | T |
| 0.50065891577600 | 0.19851798807000 | 0.41947546062200 | T | T | T |
| 0.50065330287500 | 0.19851691934300 | 0.75282262399500 | T | T | T |
| 0.83395606977700 | 0.19848559730800 | 0.08613111609750 | T | T | T |
| 0.83395695292200 | 0.19850229068100 | 0.41945888962600 | T | T | T |
| 0.83395735244400 | 0.19851305155400 | 0.75281933097800 | T | T | T |
| 0.16651909381100 | 0.19530560433900 | 0.30546851246000 | T | T | T |
| 0.16652933484200 | 0.19531123186400 | 0.63881170204200 | T | T | T |
| 0.16652345814800 | 0.19529679100600 | 0.97214207959000 | T | T | T |
| 0.49990336030200 | 0.19530889688700 | 0.30547096342800 | T | T | T |
| 0.49989367806900 | 0.19530628563000 | 0.63881589291400 | T | T | T |
| 0.49990774356200 | 0.19529366139000 | 0.97213784710300 | T | T | T |
| 0.83320737975100 | 0.19529532838000 | 0.30546074474700 | T | T | T |
| 0.83321167009100 | 0.19529763184000 | 0.63881089406900 | T | T | T |
| 0.83320633277900 | 0.19528967464800 | 0.97214576908200 | T | T | T |
| 0.16625513493400 | 0.19307618727600 | 0.19299265759100 | T | T | T |
| 0.16626132148600 | 0.19309835741900 | 0.52632135532900 | T | T | T |
| 0.16626426643100 | 0.19307572423000 | 0.85967138750700 | T | T | T |
| 0.49963859148500 | 0.19308412180000 | 0.19298668381100 | T | T | T |
| 0.49961725016700 | 0.19308515690800 | 0.52632384799300 | T | T | T |
| 0.49963160074100 | 0.19307059303700 | 0.85966319649000 | T | T | T |
| 0.83294875918900 | 0.19305830785400 | 0.19299228895000 | T | T | T |
| 0.83293963279100 | 0.19307430276500 | 0.52632445709200 | T | T | T |
| 0.83293923104700 | 0.19306550965800 | 0.85966792425700 | T | T | T |
| 0.08396828367140 | 0.19611855868300 | 0.08446548057890 | T | T | T |
| 0.08397272752120 | 0.19610632961100 | 0.41776099353500 | T | T | T |
| 0.08396938130820 | 0.19613816768900 | 0.75113115805500 | T | T | T |
| 0.41735472846000 | 0.19613720117800 | 0.08445045225980 | T | T | T |
| 0.41734970698000 | 0.19611903703000 | 0.41777178940100 | T | T | T |
| 0.41735027091800 | 0.19613426602400 | 0.75112619471900 | T | T | T |

|                  |                  |                  |   |   |   |
|------------------|------------------|------------------|---|---|---|
| 0.75065357074400 | 0.19611892713400 | 0.08446364936370 | T | T | T |
| 0.75066193975300 | 0.19611973994200 | 0.41777217835200 | T | T | T |
| 0.75065577928900 | 0.19613516481400 | 0.75113477823700 | T | T | T |
| 0.08324943312320 | 0.19526497134800 | 0.30522603426900 | T | T | T |
| 0.08324869136720 | 0.19526692040000 | 0.63856245505900 | T | T | T |
| 0.08325242615140 | 0.19525631507900 | 0.97189848285700 | T | T | T |
| 0.41662018583200 | 0.19527145162600 | 0.30522749311400 | T | T | T |
| 0.41662543081100 | 0.19526490996100 | 0.63856442589500 | T | T | T |
| 0.41663036197900 | 0.19526175399300 | 0.97188660959200 | T | T | T |
| 0.74994395442600 | 0.19525888029900 | 0.30521539795300 | T | T | T |
| 0.74994562252700 | 0.19526032278700 | 0.63856186352100 | T | T | T |
| 0.74993805058900 | 0.19525205052000 | 0.97189713186700 | T | T | T |
| 0.08359223222530 | 0.19284720894000 | 0.19275409071900 | T | T | T |
| 0.08360182938760 | 0.19286757049000 | 0.52608135241300 | T | T | T |
| 0.08360213760460 | 0.19284834162800 | 0.85942363793900 | T | T | T |
| 0.41696594062100 | 0.19286915550300 | 0.19275098578900 | T | T | T |
| 0.41696674137600 | 0.19286967659600 | 0.52608889782200 | T | T | T |
| 0.41697044391800 | 0.19285966199200 | 0.85942496093600 | T | T | T |
| 0.75029255353300 | 0.19283102933700 | 0.19274920751900 | T | T | T |
| 0.75029347832400 | 0.19284868163000 | 0.52608154511500 | T | T | T |
| 0.75028612435900 | 0.19283716730100 | 0.85942207002300 | T | T | T |
| 0.24987526313000 | 0.19397985341700 | 0.08235887702720 | T | T | T |
| 0.24988544927600 | 0.19398548033300 | 0.41568859512900 | T | T | T |
| 0.24988549486200 | 0.19399331733700 | 0.74903079338300 | T | T | T |
| 0.58324116212300 | 0.19397610315000 | 0.08236285603040 | T | T | T |
| 0.58323993364100 | 0.19399577539700 | 0.41568630879500 | T | T | T |
| 0.58322775478100 | 0.19398716776200 | 0.74903749308000 | T | T | T |
| 0.91654846150800 | 0.19396204909700 | 0.08236609538920 | T | T | T |
| 0.91654925790200 | 0.19397825563500 | 0.41568175772000 | T | T | T |
| 0.91654266379800 | 0.19398197258400 | 0.74903429664500 | T | T | T |

|                  |                  |                  |   |   |   |
|------------------|------------------|------------------|---|---|---|
| 0.25024736849500 | 0.19491819749300 | 0.30442242626500 | T | T | T |
| 0.25025834296700 | 0.19490978670800 | 0.63775318594200 | T | T | T |
| 0.25024730298200 | 0.19490190888300 | 0.97108457387400 | T | T | T |
| 0.58361380899500 | 0.19491186694900 | 0.30440940199900 | T | T | T |
| 0.58359956798100 | 0.19490542183700 | 0.63775484373400 | T | T | T |
| 0.58360418315200 | 0.19488833899700 | 0.97108224833300 | T | T | T |
| 0.91692106814400 | 0.19490153629500 | 0.30441202766300 | T | T | T |
| 0.91691122850500 | 0.19489602244900 | 0.63774781450100 | T | T | T |
| 0.91691655389000 | 0.19488857873400 | 0.97109066080500 | T | T | T |
| 0.25004235305200 | 0.19388719197700 | 0.19320376018400 | T | T | T |
| 0.25005404728000 | 0.19390242449100 | 0.52654141661300 | T | T | T |
| 0.25005602764000 | 0.19388839627100 | 0.85987946262300 | T | T | T |
| 0.58341258300900 | 0.19388824394500 | 0.19320386563300 | T | T | T |
| 0.58340521009200 | 0.19390360062000 | 0.52654414442700 | T | T | T |
| 0.58340621353400 | 0.19388129121100 | 0.85988532045200 | T | T | T |
| 0.91671719413300 | 0.19386371768100 | 0.19320630138500 | T | T | T |
| 0.91671592706200 | 0.19389165896100 | 0.52654110380400 | T | T | T |
| 0.91671254420400 | 0.19387669390300 | 0.85988044222000 | T | T | T |
| 0.04194417074670 | 0.26584324371500 | 0.03161098829080 | T | T | T |
| 0.04193998014420 | 0.26586901188000 | 0.36493430556900 | T | T | T |
| 0.04193910445070 | 0.26587447640500 | 0.69827520916500 | T | T | T |
| 0.37531010261500 | 0.26587210247300 | 0.03159241920280 | T | T | T |
| 0.37530341709900 | 0.26588681395600 | 0.36493623896700 | T | T | T |
| 0.37531153764600 | 0.26588039504300 | 0.69826976590000 | T | T | T |
| 0.70862913361900 | 0.26584424218200 | 0.03160686344180 | T | T | T |
| 0.70862948327400 | 0.26586675912100 | 0.36493102324600 | T | T | T |
| 0.70863328740700 | 0.26585711122900 | 0.69827955708100 | T | T | T |
| 0.04115273621760 | 0.26411609200500 | 0.25097416659200 | T | T | T |
| 0.04115954703130 | 0.26414260966400 | 0.58432017178300 | T | T | T |
| 0.04115587205690 | 0.26412272058500 | 0.91766574193200 | T | T | T |

|                  |                  |                  |   |   |   |
|------------------|------------------|------------------|---|---|---|
| 0.37452822679400 | 0.26415087389200 | 0.25098254174700 | T | T | T |
| 0.37453302113200 | 0.26415865004100 | 0.58432301290400 | T | T | T |
| 0.37453722019200 | 0.26414644369600 | 0.91765355573600 | T | T | T |
| 0.70785423349200 | 0.26412198957900 | 0.25097273102100 | T | T | T |
| 0.70785711388100 | 0.26413852777100 | 0.58432406869100 | T | T | T |
| 0.70784542594300 | 0.26412295885200 | 0.91766136113900 | T | T | T |
| 0.04044721002220 | 0.26578472084300 | 0.14248522435900 | T | T | T |
| 0.04046480729130 | 0.26581238105100 | 0.47579946221400 | T | T | T |
| 0.04045020406350 | 0.26580748830200 | 0.80917290815300 | T | T | T |
| 0.37382011578700 | 0.26581769064200 | 0.14248432360400 | T | T | T |
| 0.37382893468600 | 0.26581975491700 | 0.47581361797300 | T | T | T |
| 0.37382447937600 | 0.26580966803300 | 0.80915998142700 | T | T | T |
| 0.70713667764100 | 0.26579660247300 | 0.14249224343300 | T | T | T |
| 0.70714954981800 | 0.26581133178100 | 0.47581838219000 | T | T | T |
| 0.70713426805500 | 0.26580240920800 | 0.80917647470800 | T | T | T |
| 0.20839423143800 | 0.26550599213800 | 0.03086753832120 | T | T | T |
| 0.20839193088600 | 0.26553078932600 | 0.36420482825300 | T | T | T |
| 0.20840385555500 | 0.26553299696500 | 0.69753787176700 | T | T | T |
| 0.54177327804400 | 0.26550429317600 | 0.03085739390820 | T | T | T |
| 0.54176617788300 | 0.26552496575700 | 0.36420152698400 | T | T | T |
| 0.54176283105700 | 0.26550750148000 | 0.69754092470600 | T | T | T |
| 0.87507176776800 | 0.26547701168000 | 0.03086887032800 | T | T | T |
| 0.87506721815000 | 0.26549764400400 | 0.36419803485300 | T | T | T |
| 0.87507218518100 | 0.26550385962300 | 0.69753010623500 | T | T | T |
| 0.20739584813600 | 0.26490020872900 | 0.25081759930000 | T | T | T |
| 0.20739898051000 | 0.26493281045900 | 0.58416281172600 | T | T | T |
| 0.20739832046200 | 0.26490067146200 | 0.91750039265300 | T | T | T |
| 0.54076564629800 | 0.26490409481300 | 0.25081582737300 | T | T | T |
| 0.54075565510400 | 0.26492370083700 | 0.58416364617400 | T | T | T |
| 0.54076572676900 | 0.26490048780600 | 0.91749772378000 | T | T | T |

|                  |                  |                  |   |   |   |
|------------------|------------------|------------------|---|---|---|
| 0.87407251187700 | 0.26486165369700 | 0.25080996678400 | T | T | T |
| 0.87406929478300 | 0.26490129939700 | 0.58415605940100 | T | T | T |
| 0.87406796915700 | 0.26487401951000 | 0.91750159584200 | T | T | T |
| 0.20736932170800 | 0.25913001833700 | 0.13685215569300 | T | T | T |
| 0.20736422984700 | 0.25913429376800 | 0.47016524080800 | T | T | T |
| 0.20736949162600 | 0.25912030402200 | 0.80352716246200 | T | T | T |
| 0.54072358242300 | 0.25913238908700 | 0.13684802980700 | T | T | T |
| 0.54070907905700 | 0.25911637071000 | 0.47017222348100 | T | T | T |
| 0.54071763492800 | 0.25910864715400 | 0.80353454053600 | T | T | T |
| 0.87404858292800 | 0.25911170531200 | 0.13685686743100 | T | T | T |
| 0.87403585681800 | 0.25911330487900 | 0.47017380906200 | T | T | T |
| 0.87403957229700 | 0.25911549277800 | 0.80353700558200 | T | T | T |
| 0.19124045801800 | 0.37511969488400 | 0.22419749425900 | T | T | T |
| 0.19123000731200 | 0.37515407305200 | 0.55752494736400 | T | T | T |
| 0.19122777908400 | 0.37512493396300 | 0.89089105066600 | T | T | T |
| 0.52459102485100 | 0.37512209429500 | 0.22419289485200 | T | T | T |
| 0.52458817115100 | 0.37515738290800 | 0.55752322553500 | T | T | T |
| 0.52459321689700 | 0.37512433687100 | 0.89088590697100 | T | T | T |
| 0.85792956045600 | 0.37509587493500 | 0.22419400153800 | T | T | T |
| 0.85793548599100 | 0.37513621789700 | 0.55752272231200 | T | T | T |
| 0.85792807316200 | 0.37510779276700 | 0.89089004123400 | T | T | T |
| 0.21749089304000 | 0.29100822269000 | 0.15615268481000 | T | T | T |
| 0.21748195993100 | 0.29102178893900 | 0.48947971874100 | T | T | T |
| 0.21749999060200 | 0.29100644753300 | 0.82282093945400 | T | T | T |
| 0.55084621542900 | 0.29099297258900 | 0.15615143904100 | T | T | T |
| 0.55083375126800 | 0.29100204484200 | 0.48948160075000 | T | T | T |
| 0.55085304204900 | 0.29098892210900 | 0.82282208978800 | T | T | T |
| 0.88416638661600 | 0.29099446917400 | 0.15615130969200 | T | T | T |
| 0.88415545028000 | 0.29099871984300 | 0.48948061260500 | T | T | T |
| 0.88417612087200 | 0.29099077521300 | 0.82281829099800 | T | T | T |



|                  |                  |                  |   |   |   |
|------------------|------------------|------------------|---|---|---|
| 0.22349799538900 | 0.33575553318700 | 0.23891350284700 | T | T | T |
| 0.22350370059700 | 0.33580516016900 | 0.57223686849700 | T | T | T |
| 0.22349380597800 | 0.33576176299000 | 0.90559131964200 | T | T | T |
| 0.55684720712200 | 0.33575267500500 | 0.23891687644300 | T | T | T |
| 0.55685313500700 | 0.33580468481900 | 0.57224438694800 | T | T | T |
| 0.55685115600100 | 0.33574054889700 | 0.90559727258200 | T | T | T |
| 0.89017419845900 | 0.33571828980100 | 0.23892296596500 | T | T | T |
| 0.89018816660700 | 0.33576892303700 | 0.57225150019400 | T | T | T |
| 0.89017719329600 | 0.33571944786300 | 0.90560581261800 | T | T | T |
| 0.16354204706400 | 0.36193725951500 | 0.24393774125100 | T | T | T |
| 0.16353018760000 | 0.36197105077100 | 0.57726364194800 | T | T | T |
| 0.16353456281300 | 0.36194099142100 | 0.91063278238800 | T | T | T |
| 0.49689401448800 | 0.36194716920100 | 0.24393269277800 | T | T | T |
| 0.49688630468100 | 0.36197771812500 | 0.57725491861900 | T | T | T |
| 0.49690169605300 | 0.36194208480500 | 0.91062348998200 | T | T | T |
| 0.83023380157500 | 0.36191950069200 | 0.24392988760100 | T | T | T |
| 0.83023475299600 | 0.36195797169500 | 0.57725211392800 | T | T | T |
| 0.83023614172000 | 0.36192788985200 | 0.91062426996500 | T | T | T |
| 0.16374536778400 | 0.35150586598000 | 0.20947187371500 | T | T | T |
| 0.16374194965600 | 0.35153941205500 | 0.54279986009200 | T | T | T |
| 0.16373770947100 | 0.35151710273500 | 0.87616850426000 | T | T | T |
| 0.49709721359500 | 0.35151392346800 | 0.20946879390900 | T | T | T |
| 0.49709862582700 | 0.35154065512700 | 0.54279419740600 | T | T | T |
| 0.49710378839700 | 0.35152328136400 | 0.87615870496900 | T | T | T |
| 0.83043604834300 | 0.35148585965900 | 0.20946791770700 | T | T | T |
| 0.83044547116800 | 0.35151903607100 | 0.54279097902300 | T | T | T |
| 0.83043832402200 | 0.35150612774900 | 0.87616261149200 | T | T | T |
| 0.17731584661400 | 0.32597275015500 | 0.27147193254200 | T | T | T |
| 0.17729403108900 | 0.32601859494300 | 0.60480579282600 | T | T | T |
| 0.17730980004500 | 0.32595614265200 | 0.93815848889100 | T | T | T |

|                  |                  |                  |   |   |   |
|------------------|------------------|------------------|---|---|---|
| 0.51066599953300 | 0.32596820818200 | 0.27146904760000 | T | T | T |
| 0.51065069767600 | 0.32601058414700 | 0.60480153949900 | T | T | T |
| 0.51067119570700 | 0.32594186919000 | 0.93815040851600 | T | T | T |
| 0.84401372222100 | 0.32593401718200 | 0.27145971739600 | T | T | T |
| 0.84400158423100 | 0.32597512031300 | 0.60478918656900 | T | T | T |
| 0.84401000639500 | 0.32591902701100 | 0.93814521367400 | T | T | T |
| 0.14427853020900 | 0.32259737040600 | 0.26746555643200 | T | T | T |
| 0.14427076655000 | 0.32261442696200 | 0.60078511864800 | T | T | T |
| 0.14427798057500 | 0.32258523137800 | 0.93414513430700 | T | T | T |
| 0.47763538176200 | 0.32260893710200 | 0.26746484886400 | T | T | T |
| 0.47762577280300 | 0.32262291391400 | 0.60078228909900 | T | T | T |
| 0.47764448644700 | 0.32259201913500 | 0.93414207919100 | T | T | T |
| 0.81098001704800 | 0.32258771956100 | 0.26746857216100 | T | T | T |
| 0.81097495677700 | 0.32260958516400 | 0.60078331324300 | T | T | T |
| 0.81098415853600 | 0.32257961628400 | 0.93414757419200 | T | T | T |
| 0.23513153827400 | 0.38471878777000 | 0.24012286347600 | T | T | T |
| 0.23511675518900 | 0.38477603653500 | 0.57346203027000 | T | T | T |
| 0.23513206880200 | 0.38472874235800 | 0.90680652757800 | T | T | T |
| 0.56847065668300 | 0.38472037675100 | 0.24012662660700 | T | T | T |
| 0.56845970605100 | 0.38478029438500 | 0.57346980730700 | T | T | T |
| 0.56848178329800 | 0.38470700658200 | 0.90681095808400 | T | T | T |
| 0.90181495758800 | 0.38468136207700 | 0.24012491235300 | T | T | T |
| 0.90181344987800 | 0.38473137234900 | 0.57346864825500 | T | T | T |
| 0.90182756633300 | 0.38467993188000 | 0.90681186517000 | T | T | T |
| 0.14371960964100 | 0.29986416685700 | 0.17790873845900 | T | T | T |
| 0.14371538155400 | 0.29990213625000 | 0.51123245910500 | T | T | T |
| 0.14371859832300 | 0.29986039847000 | 0.84459055681000 | T | T | T |
| 0.47707544774400 | 0.29988120055600 | 0.17791242801400 | T | T | T |
| 0.47707308450000 | 0.29989162255700 | 0.51123442712500 | T | T | T |
| 0.47708263210700 | 0.29987482945000 | 0.84458773366100 | T | T | T |

|                  |                  |                  |   |   |   |
|------------------|------------------|------------------|---|---|---|
| 0.81041569083700 | 0.29985211559400 | 0.17790601017300 | T | T | T |
| 0.81041839664300 | 0.29987238908000 | 0.51123182546000 | T | T | T |
| 0.81041698429700 | 0.29985916974600 | 0.84458525124500 | T | T | T |
| 0.17706062279600 | 0.30382124937200 | 0.17873503030300 | T | T | T |
| 0.17706016999700 | 0.30383932940300 | 0.51205335897900 | T | T | T |
| 0.17706042792800 | 0.30382382850400 | 0.84541427986100 | T | T | T |
| 0.51041728543600 | 0.30381592795700 | 0.17872804841700 | T | T | T |
| 0.51041637045500 | 0.30383116167600 | 0.51205356376000 | T | T | T |
| 0.51042769864100 | 0.30381123729400 | 0.84540508471600 | T | T | T |
| 0.84375774826200 | 0.30379342234300 | 0.17873634370100 | T | T | T |
| 0.84376510636200 | 0.30380748889300 | 0.51205656832400 | T | T | T |
| 0.84376168557600 | 0.30379700045500 | 0.84541519257900 | T | T | T |
| 0.19142218713800 | 0.88735222851700 | 0.22399639232800 | T | T | T |
| 0.19140729148200 | 0.88733458883200 | 0.55732017341100 | T | T | T |
| 0.19141205008300 | 0.88735225598600 | 0.89069718686100 | T | T | T |
| 0.52476770045300 | 0.88735488360600 | 0.22399246494200 | T | T | T |
| 0.52475795360200 | 0.88734647175600 | 0.55731947835000 | T | T | T |
| 0.52476780899400 | 0.88736270612000 | 0.89069377757900 | T | T | T |
| 0.85811440952800 | 0.88738164777600 | 0.22399698201700 | T | T | T |
| 0.85810986241200 | 0.88736437881000 | 0.55732372774900 | T | T | T |
| 0.85811434860600 | 0.88737880328000 | 0.89070206562000 | T | T | T |
| 0.21650264796300 | 0.97070947349000 | 0.15606503076600 | T | T | T |
| 0.21649910795100 | 0.97062755358500 | 0.48936539719900 | T | T | T |
| 0.21651162494200 | 0.97072124998700 | 0.82274281318900 | T | T | T |
| 0.54986124288900 | 0.97071091555000 | 0.15606405713300 | T | T | T |
| 0.54985388971300 | 0.97062771943800 | 0.48936197531700 | T | T | T |
| 0.54986428607700 | 0.97073292020600 | 0.82274687933800 | T | T | T |
| 0.88319077463400 | 0.97074354049800 | 0.15608246568800 | T | T | T |
| 0.88318110381000 | 0.97067768588600 | 0.48938725786100 | T | T | T |
| 0.88319988855500 | 0.97076704640100 | 0.82276336482000 | T | T | T |

|                  |                  |                  |   |   |   |
|------------------|------------------|------------------|---|---|---|
| 0.22335211848900 | 0.92791710453400 | 0.23795451283700 | T | T | T |
| 0.22335294251400 | 0.92787827846300 | 0.57127186950800 | T | T | T |
| 0.22334740165000 | 0.92790894518900 | 0.90463895385600 | T | T | T |
| 0.55669981004800 | 0.92791583423600 | 0.23795351900200 | T | T | T |
| 0.55669830778100 | 0.92789794546600 | 0.57127617496400 | T | T | T |
| 0.55670466434300 | 0.92792924918200 | 0.90464448044300 | T | T | T |
| 0.89002974424800 | 0.92795292507700 | 0.23796353947200 | T | T | T |
| 0.89004048067400 | 0.92791789910000 | 0.57129046163600 | T | T | T |
| 0.89003673676700 | 0.92794731849600 | 0.90465787187300 | T | T | T |
| 0.16377724500400 | 0.90055252965800 | 0.24375716874600 | T | T | T |
| 0.16376857724200 | 0.90054445370300 | 0.57708451787700 | T | T | T |
| 0.16377081997500 | 0.90054827677200 | 0.91045634916200 | T | T | T |
| 0.49712770070100 | 0.90055208154800 | 0.24375542936900 | T | T | T |
| 0.49712168435900 | 0.90054655019700 | 0.57708409823300 | T | T | T |
| 0.49713331939600 | 0.90056264677600 | 0.91045564791900 | T | T | T |
| 0.83046749430800 | 0.90057359817200 | 0.24375490716300 | T | T | T |
| 0.83046732185800 | 0.90056516694700 | 0.57708192208800 | T | T | T |
| 0.83047161489400 | 0.90057259620400 | 0.91045599308000 | T | T | T |
| 0.16389897228500 | 0.91049672443100 | 0.20930514242300 | T | T | T |
| 0.16388958839000 | 0.91046687935300 | 0.54262760679800 | T | T | T |
| 0.16389271085000 | 0.91049627069700 | 0.87600681813300 | T | T | T |
| 0.49724756654100 | 0.91049353691300 | 0.20930151198200 | T | T | T |
| 0.49723789062400 | 0.91048032276500 | 0.54262904414500 | T | T | T |
| 0.49725102581200 | 0.91050649653700 | 0.87600021714400 | T | T | T |
| 0.83059244094100 | 0.91052431045300 | 0.20930506746800 | T | T | T |
| 0.83059167842700 | 0.91050794149900 | 0.54262675381200 | T | T | T |
| 0.83059776429200 | 0.91052414384500 | 0.87600554451300 | T | T | T |
| 0.17751888757300 | 0.93727406494600 | 0.27099638544100 | T | T | T |
| 0.17750544040400 | 0.93725127212800 | 0.60432570691700 | T | T | T |
| 0.17751291341000 | 0.93728278973700 | 0.93769548489700 | T | T | T |

|                  |                  |                  |   |   |   |
|------------------|------------------|------------------|---|---|---|
| 0.51086802580400 | 0.93727471712500 | 0.27099616147500 | T | T | T |
| 0.51086416890400 | 0.93726491751800 | 0.60432835845900 | T | T | T |
| 0.51087252755300 | 0.93729440364100 | 0.93769431797900 | T | T | T |
| 0.84421465789700 | 0.93729458558100 | 0.27099211703300 | T | T | T |
| 0.84420958094100 | 0.93728592792600 | 0.60431951544200 | T | T | T |
| 0.84421214088200 | 0.93730564981700 | 0.93769047282500 | T | T | T |
| 0.14442379025700 | 0.94026355451900 | 0.26703544019600 | T | T | T |
| 0.14442481000900 | 0.94025432101400 | 0.60035998945500 | T | T | T |
| 0.14442445493700 | 0.94026776729800 | 0.93372579863900 | T | T | T |
| 0.47778207449300 | 0.94024967235700 | 0.26703771443800 | T | T | T |
| 0.47778039305700 | 0.94024859708100 | 0.60036490447800 | T | T | T |
| 0.47778965240800 | 0.94025944106900 | 0.93373017597800 | T | T | T |
| 0.81112559865400 | 0.94026761193200 | 0.26704298151700 | T | T | T |
| 0.81112384688700 | 0.94026323810900 | 0.60036424248000 | T | T | T |
| 0.81113125138900 | 0.94027071480700 | 0.93373612477100 | T | T | T |
| 0.23545198947200 | 0.87940624122400 | 0.23969160706900 | T | T | T |
| 0.23544286195700 | 0.87936413504800 | 0.57302152940700 | T | T | T |
| 0.23545841916400 | 0.87939174835200 | 0.90638471147800 | T | T | T |
| 0.56879154476100 | 0.87940358486700 | 0.23969502980900 | T | T | T |
| 0.56877766705100 | 0.87937777010900 | 0.57301941819800 | T | T | T |
| 0.56880260860600 | 0.87941280783200 | 0.90638948148900 | T | T | T |
| 0.90213412295300 | 0.87944189020600 | 0.23969615190000 | T | T | T |
| 0.90213232642400 | 0.87940514876800 | 0.57303075413100 | T | T | T |
| 0.90215335047000 | 0.87943763145000 | 0.90639826332500 | T | T | T |
| 0.14400832078500 | 0.96178073976900 | 0.17780750697300 | T | T | T |
| 0.14399836115000 | 0.96173140776700 | 0.51111664954400 | T | T | T |
| 0.14400695342500 | 0.96178351829800 | 0.84448899832700 | T | T | T |
| 0.47736302359600 | 0.96176281113700 | 0.17780535362300 | T | T | T |
| 0.47735617244600 | 0.96173942938500 | 0.51112342022600 | T | T | T |
| 0.47737125220800 | 0.96177152899200 | 0.84448383809700 | T | T | T |

|                  |                  |                  |   |   |   |
|------------------|------------------|------------------|---|---|---|
| 0.81070777811100 | 0.96180444047100 | 0.17780130908000 | T | T | T |
| 0.81070204114300 | 0.96177204785100 | 0.51112152219600 | T | T | T |
| 0.81070875617200 | 0.96179729693300 | 0.84447931013600 | T | T | T |
| 0.17735198362000 | 0.95828235713600 | 0.17876027292600 | T | T | T |
| 0.17734288311500 | 0.95824739954700 | 0.51206842391200 | T | T | T |
| 0.17735193100700 | 0.95826510713500 | 0.84543837615800 | T | T | T |
| 0.51070775088200 | 0.95828272390900 | 0.17874907426700 | T | T | T |
| 0.51070165018200 | 0.95825078596700 | 0.51207116689900 | T | T | T |
| 0.51071904100900 | 0.95827349709200 | 0.84542752191000 | T | T | T |
| 0.84405021059100 | 0.95832750560100 | 0.17876013925900 | T | T | T |
| 0.84404861375600 | 0.95830372073300 | 0.51207600495600 | T | T | T |
| 0.84405493059700 | 0.95831744388600 | 0.84543687705900 | T | T | T |
| 0.03168297433290 | 0.37458535672800 | 0.22401254524500 | T | T | T |
| 0.03168188811150 | 0.37461136517800 | 0.55734116728800 | T | T | T |
| 0.03168110133170 | 0.37458882636800 | 0.89071048229400 | T | T | T |
| 0.36502829265700 | 0.37461140607200 | 0.22401419379600 | T | T | T |
| 0.36502968960300 | 0.37463882692400 | 0.55734264305100 | T | T | T |
| 0.36503104707000 | 0.37463002576700 | 0.89071143065000 | T | T | T |
| 0.69837184543300 | 0.37459744881500 | 0.22400932477100 | T | T | T |
| 0.69836838523700 | 0.37463379312300 | 0.55733977517000 | T | T | T |
| 0.69836409132800 | 0.37461090045600 | 0.89070956369900 | T | T | T |
| 0.06177009981640 | 0.33417880673200 | 0.24052260726700 | T | T | T |
| 0.06177602057280 | 0.33421076977600 | 0.57385311886700 | T | T | T |
| 0.06176432576460 | 0.33417736741900 | 0.90720718363000 | T | T | T |
| 0.39511290229200 | 0.33420287813600 | 0.24051733289100 | T | T | T |
| 0.39511859476800 | 0.33423165351500 | 0.57385214559800 | T | T | T |
| 0.39510920789400 | 0.33420348216500 | 0.90720565584800 | T | T | T |
| 0.72845591134800 | 0.33418099884800 | 0.24051822470500 | T | T | T |
| 0.72846031651700 | 0.33422264760200 | 0.57385163165100 | T | T | T |
| 0.72844741199900 | 0.33418426546100 | 0.90720882734900 | T | T | T |

|                  |                  |                  |   |   |   |
|------------------|------------------|------------------|---|---|---|
| 0.00201388777776 | 0.36316920607600 | 0.24116881238000 | T | T | T |
| 0.00201606157702 | 0.36319810991100 | 0.57449236749000 | T | T | T |
| 0.00201623483151 | 0.36318825749000 | 0.90786073621800 | T | T | T |
| 0.33535709936000 | 0.36320054795000 | 0.24117164258200 | T | T | T |
| 0.33536016623000 | 0.36323226652300 | 0.57449130620700 | T | T | T |
| 0.33536035655200 | 0.36322942186800 | 0.90786192946600 | T | T | T |
| 0.66869943453500 | 0.36318865919000 | 0.24116152736800 | T | T | T |
| 0.66870050025300 | 0.36322139296300 | 0.57448674326100 | T | T | T |
| 0.66869599706500 | 0.36320196419100 | 0.90785812942900 | T | T | T |
| 0.00518099819403 | 0.35110457451900 | 0.20741489683600 | T | T | T |
| 0.00518680586833 | 0.35112709585100 | 0.54074133722000 | T | T | T |
| 0.00518251064060 | 0.35111606177700 | 0.87411634129000 | T | T | T |
| 0.33852395974300 | 0.35113669113700 | 0.20741584815200 | T | T | T |
| 0.33853303916700 | 0.35116681525700 | 0.54074330683700 | T | T | T |
| 0.33852864044400 | 0.35116689697600 | 0.87411315193900 | T | T | T |
| 0.67187139523800 | 0.35111726732700 | 0.20741236382200 | T | T | T |
| 0.67187719388900 | 0.35114577096200 | 0.54073895643800 | T | T | T |
| 0.67186778512300 | 0.35112946562200 | 0.87411252008700 | T | T | T |
| 0.01265367320090 | 0.32579222908100 | 0.26980672064300 | T | T | T |
| 0.01264924040120 | 0.32581564675000 | 0.60313672289900 | T | T | T |
| 0.01265036367170 | 0.32578419138100 | 0.93649926757300 | T | T | T |
| 0.34599308244700 | 0.32581572124400 | 0.26980673038300 | T | T | T |
| 0.34599530277600 | 0.32584558492300 | 0.60313820359500 | T | T | T |
| 0.34599405472600 | 0.32582424829200 | 0.93649701606000 | T | T | T |
| 0.67933668274000 | 0.32580181416000 | 0.26980315876200 | T | T | T |
| 0.67933411077800 | 0.32582930302300 | 0.60313144567700 | T | T | T |
| 0.67932719529500 | 0.32579271989000 | 0.93649484801300 | T | T | T |
| 0.31302057931900 | 0.32587230800700 | 0.26557506261400 | T | T | T |
| 0.31302218216500 | 0.32589187133400 | 0.59889994288200 | T | T | T |
| 0.31302176994500 | 0.32588345767900 | 0.93225933783600 | T | T | T |

|                  |                  |                  |   |   |   |
|------------------|------------------|------------------|---|---|---|
| 0.64636686417500 | 0.32585129034300 | 0.26557122632900 | T | T | T |
| 0.64636479163400 | 0.32587473327100 | 0.59889504332000 | T | T | T |
| 0.64636048397800 | 0.32584290783200 | 0.93225775048600 | T | T | T |
| 0.97968047544200 | 0.32583652643000 | 0.26557348078000 | T | T | T |
| 0.97968281678800 | 0.32585817106200 | 0.59890101744900 | T | T | T |
| 0.97968426332300 | 0.32583540144100 | 0.93226101792900 | T | T | T |
| 0.07331190764550 | 0.38278269792600 | 0.24412202322000 | T | T | T |
| 0.07330897839130 | 0.38281110559400 | 0.57746123715800 | T | T | T |
| 0.07331694757970 | 0.38278229382300 | 0.91082019855500 | T | T | T |
| 0.40665702128700 | 0.38280098285100 | 0.24412773203300 | T | T | T |
| 0.40664964968500 | 0.38284151603400 | 0.57747101755700 | T | T | T |
| 0.40665912605300 | 0.38280798579500 | 0.91082549191500 | T | T | T |
| 0.73999741565700 | 0.38278528939500 | 0.24412061373800 | T | T | T |
| 0.73999028067600 | 0.38282558662700 | 0.57746300720100 | T | T | T |
| 0.73999650029000 | 0.38278747894000 | 0.91082241811500 | T | T | T |
| 0.31680168266300 | 0.30321684528900 | 0.17805275514000 | T | T | T |
| 0.31681834409200 | 0.30322675857800 | 0.51137998353300 | T | T | T |
| 0.31681259171600 | 0.30322098023800 | 0.84474597651900 | T | T | T |
| 0.65015976687800 | 0.30320352107700 | 0.17804922411900 | T | T | T |
| 0.65016142838800 | 0.30321625916400 | 0.51137497976000 | T | T | T |
| 0.65014715297900 | 0.30320070646600 | 0.84474399801500 | T | T | T |
| 0.98346261507500 | 0.30319001111500 | 0.17804926720300 | T | T | T |
| 0.98346418474800 | 0.30319891325700 | 0.51137088796000 | T | T | T |
| 0.98345884588100 | 0.30318649874900 | 0.84474520637200 | T | T | T |
| 0.01684369596670 | 0.29952391208000 | 0.17709313574200 | T | T | T |
| 0.01685660878410 | 0.29953890176200 | 0.51041263515000 | T | T | T |
| 0.01684262235560 | 0.29951559068300 | 0.84378554037300 | T | T | T |
| 0.35019316828400 | 0.29953785809600 | 0.17709372195100 | T | T | T |
| 0.35020747518800 | 0.29955382451700 | 0.51041682475600 | T | T | T |
| 0.35019625026200 | 0.29954028203100 | 0.84378365156800 | T | T | T |



|                  |                  |                  |   |   |   |
|------------------|------------------|------------------|---|---|---|
| 0.68354080707300 | 0.29952028723100 | 0.17709169336000 | T | T | T |
| 0.68355112672400 | 0.29953270015000 | 0.51041648788100 | T | T | T |
| 0.68353145639200 | 0.29951585596000 | 0.84378652545400 | T | T | T |
| 0.03193096493330 | 0.88774369619700 | 0.22418739376100 | T | T | T |
| 0.03192074127240 | 0.88772402500500 | 0.55751169693900 | T | T | T |
| 0.03192684870070 | 0.88774546791700 | 0.89087943982500 | T | T | T |
| 0.36527501999300 | 0.88772143779300 | 0.22418818017200 | T | T | T |
| 0.36526859782700 | 0.88770021510000 | 0.55751038448700 | T | T | T |
| 0.36527371458000 | 0.88771285500300 | 0.89087525130600 | T | T | T |
| 0.69862308730100 | 0.88774064096000 | 0.22418378634700 | T | T | T |
| 0.69860692522100 | 0.88771268451200 | 0.55750725148300 | T | T | T |
| 0.69861089596500 | 0.88773138743600 | 0.89087523308300 | T | T | T |
| 0.06160057702570 | 0.92870969079000 | 0.24055050345500 | T | T | T |
| 0.06160877562660 | 0.92866038236200 | 0.57387743078300 | T | T | T |
| 0.06159486970810 | 0.92871672603000 | 0.90723447511400 | T | T | T |
| 0.39494710654700 | 0.92867942098700 | 0.24054710786000 | T | T | T |
| 0.39495808637900 | 0.92862818200500 | 0.57387268514400 | T | T | T |
| 0.39494722561200 | 0.92867450841900 | 0.90722833812000 | T | T | T |
| 0.72829092092000 | 0.92870160285200 | 0.24054745362900 | T | T | T |
| 0.72829938211700 | 0.92864218884500 | 0.57387393580200 | T | T | T |
| 0.72828593697500 | 0.92869651929800 | 0.90723312626800 | T | T | T |
| 0.00222825139441 | 0.89859478539000 | 0.24139066682700 | T | T | T |
| 0.00222241036578 | 0.89858830036000 | 0.57471059956000 | T | T | T |
| 0.00223130599175 | 0.89858337631800 | 0.90807665289200 | T | T | T |
| 0.33557173421300 | 0.89857364977500 | 0.24139261433900 | T | T | T |
| 0.33556916080600 | 0.89856786877700 | 0.57470918940600 | T | T | T |
| 0.33557328532800 | 0.89856465751500 | 0.90807684959600 | T | T | T |
| 0.66891730404200 | 0.89859073024600 | 0.24138054050600 | T | T | T |
| 0.66891014663600 | 0.89858060324800 | 0.57470215684000 | T | T | T |
| 0.66891174768500 | 0.89858986142900 | 0.90807172122700 | T | T | T |

|                  |                  |                  |   |   |   |
|------------------|------------------|------------------|---|---|---|
| 0.00518638795368 | 0.91057422877100 | 0.20760273018700 | T | T | T |
| 0.00518771953550 | 0.91056648900900 | 0.54091807002400 | T | T | T |
| 0.00518923869126 | 0.91056793929900 | 0.87430131376300 | T | T | T |
| 0.33853197815500 | 0.91055319385700 | 0.20760088061800 | T | T | T |
| 0.33853482169900 | 0.91054257768600 | 0.54091782335900 | T | T | T |
| 0.33853288373800 | 0.91054265664800 | 0.87429097402500 | T | T | T |
| 0.67188342067300 | 0.91057680984100 | 0.20759543494600 | T | T | T |
| 0.67187830806700 | 0.91056234146600 | 0.54091021318100 | T | T | T |
| 0.67187718261600 | 0.91057279746300 | 0.87428728679100 | T | T | T |
| 0.01285049376100 | 0.93604714885700 | 0.26999669143400 | T | T | T |
| 0.01284021337010 | 0.93603081649200 | 0.60332512348800 | T | T | T |
| 0.01284880989880 | 0.93606436883300 | 0.93667918632800 | T | T | T |
| 0.34619037914500 | 0.93602620474900 | 0.26999762070100 | T | T | T |
| 0.34619028717800 | 0.93600354783300 | 0.60332844022700 | T | T | T |
| 0.34619235977100 | 0.93602978395500 | 0.93667778377600 | T | T | T |
| 0.67953917418000 | 0.93604140637100 | 0.26999465936600 | T | T | T |
| 0.67952958901400 | 0.93602342463700 | 0.60332331126000 | T | T | T |
| 0.67952841421500 | 0.93606113478600 | 0.93667547177900 | T | T | T |
| 0.31320898687900 | 0.93559112843700 | 0.26600551420000 | T | T | T |
| 0.31320803166200 | 0.93558471788600 | 0.59932949031000 | T | T | T |
| 0.31320801599600 | 0.93559881073800 | 0.93267883816600 | T | T | T |
| 0.64656209450000 | 0.93560947731300 | 0.26600585447500 | T | T | T |
| 0.64655347795700 | 0.93559950302900 | 0.59932697820600 | T | T | T |
| 0.64655257789300 | 0.93563188091500 | 0.93267836926400 | T | T | T |
| 0.97986878272800 | 0.93562107459100 | 0.26600424819900 | T | T | T |
| 0.97986629551500 | 0.93561365753300 | 0.59932656078000 | T | T | T |
| 0.97987298652800 | 0.93563405737700 | 0.93268144109600 | T | T | T |
| 0.07380422821200 | 0.88042414401000 | 0.24393894274200 | T | T | T |
| 0.07380097279470 | 0.88037631666600 | 0.57728112969300 | T | T | T |
| 0.07381283580170 | 0.88042874074500 | 0.91063105439100 | T | T | T |

|                  |                  |                  |   |   |   |
|------------------|------------------|------------------|---|---|---|
| 0.40714958645200 | 0.88039807311500 | 0.24394900394300 | T | T | T |
| 0.40714161430600 | 0.88033376783000 | 0.57729616606000 | T | T | T |
| 0.40715323452900 | 0.88038420312400 | 0.91064051790700 | T | T | T |
| 0.74049175311400 | 0.88041399048000 | 0.24394272434800 | T | T | T |
| 0.74047804883900 | 0.88035198263600 | 0.57728334451100 | T | T | T |
| 0.74049083538500 | 0.88040907365200 | 0.91063417280100 | T | T | T |
| 0.31671788625800 | 0.95816400185900 | 0.17809621443700 | T | T | T |
| 0.31672157621900 | 0.95813595972700 | 0.51139724302400 | T | T | T |
| 0.31671968138500 | 0.95816376735400 | 0.84479009760500 | T | T | T |
| 0.65008119044200 | 0.95817158530400 | 0.17808524045100 | T | T | T |
| 0.65006623562500 | 0.95814443477500 | 0.51138505178900 | T | T | T |
| 0.65006503666300 | 0.95818140096200 | 0.84478026173600 | T | T | T |
| 0.98337921997500 | 0.95818434417700 | 0.17810012122800 | T | T | T |
| 0.98337096687300 | 0.95816648472800 | 0.51139810296800 | T | T | T |
| 0.98337510730900 | 0.95819986001600 | 0.84480582651300 | T | T | T |
| 0.01679462032160 | 0.96177940821800 | 0.17713043516700 | T | T | T |
| 0.01680118537950 | 0.96174241143400 | 0.51042607781500 | T | T | T |
| 0.01679267553900 | 0.96179975498000 | 0.84383051620400 | T | T | T |
| 0.35014559398700 | 0.96176741436400 | 0.17712040766300 | T | T | T |
| 0.35014890991400 | 0.96173106539300 | 0.51042092177100 | T | T | T |
| 0.35013858054200 | 0.96177461040200 | 0.84381414686000 | T | T | T |
| 0.68349864646700 | 0.96178131020900 | 0.17711791317000 | T | T | T |
| 0.68349383036600 | 0.96174437854900 | 0.51041349561400 | T | T | T |
| 0.68348424015000 | 0.96178930185900 | 0.84380952135800 | T | T | T |
| 0.22338974009300 | 0.36475473228800 | 0.22934214804300 | T | T | T |
| 0.22338807363200 | 0.36480997109900 | 0.56267114534000 | T | T | T |
| 0.22338273262900 | 0.36475758144500 | 0.89602582212800 | T | T | T |
| 0.55673856499600 | 0.36474942026300 | 0.22934236246100 | T | T | T |
| 0.55673797876900 | 0.36481750631900 | 0.56268044798300 | T | T | T |
| 0.55673663734100 | 0.36474661917100 | 0.89603081937900 | T | T | T |

|                  |                  |                  |   |   |   |
|------------------|------------------|------------------|---|---|---|
| 0.89007484194300 | 0.36471146239800 | 0.22934713851600 | T | T | T |
| 0.89007982844300 | 0.36477164205400 | 0.56268535883300 | T | T | T |
| 0.89006989318300 | 0.36471901993800 | 0.89603806314100 | T | T | T |
| 0.16918078881200 | 0.37468734144900 | 0.22349663864400 | T | T | T |
| 0.16917306126800 | 0.37471496878400 | 0.55682446567600 | T | T | T |
| 0.16917281087000 | 0.37469259651700 | 0.89019326157300 | T | T | T |
| 0.50252939027400 | 0.37470103560300 | 0.22348995123000 | T | T | T |
| 0.50252675685000 | 0.37472341659700 | 0.55681940202400 | T | T | T |
| 0.50253439342200 | 0.37470522867200 | 0.89018222807500 | T | T | T |
| 0.83587283851100 | 0.37466663596600 | 0.22349046070300 | T | T | T |
| 0.83587571686500 | 0.37470655061000 | 0.55681481406200 | T | T | T |
| 0.83587316977600 | 0.37468533500100 | 0.89018536692700 | T | T | T |
| 0.16024466078700 | 0.34519522134500 | 0.26916685523600 | T | T | T |
| 0.16022708922900 | 0.34520880966400 | 0.60248857178000 | T | T | T |
| 0.16023080148800 | 0.34517042523800 | 0.93586123035800 | T | T | T |
| 0.49360166247000 | 0.34519690071200 | 0.26916276236700 | T | T | T |
| 0.49358191600400 | 0.34521332499100 | 0.60248454286800 | T | T | T |
| 0.49360370080800 | 0.34516500588800 | 0.93585458489900 | T | T | T |
| 0.82694897981400 | 0.34515571799300 | 0.26916337573800 | T | T | T |
| 0.82694253357100 | 0.34518347653800 | 0.60248088493800 | T | T | T |
| 0.82694512898600 | 0.34513506491900 | 0.93585781952000 | T | T | T |
| 0.16043540922600 | 0.30773231638300 | 0.19066145866700 | T | T | T |
| 0.16043357619000 | 0.30776784878200 | 0.52398746730400 | T | T | T |
| 0.16042718000600 | 0.30774060805200 | 0.85734576066500 | T | T | T |
| 0.49379719353000 | 0.30774437607600 | 0.19066509139200 | T | T | T |
| 0.49379215314600 | 0.30776684479500 | 0.52398830619800 | T | T | T |
| 0.49379511193600 | 0.30774587739300 | 0.85734427188300 | T | T | T |
| 0.82712903012400 | 0.30771099939700 | 0.19066225915800 | T | T | T |
| 0.82713653901400 | 0.30774607162700 | 0.52398572591900 | T | T | T |
| 0.82712913212000 | 0.30773106435700 | 0.85734272227100 | T | T | T |

|                  |                  |                  |   |   |   |
|------------------|------------------|------------------|---|---|---|
| 0.22353532456100 | 0.89868319468500 | 0.22862052520300 | T | T | T |
| 0.22353109087000 | 0.89865617615800 | 0.56193865264300 | T | T | T |
| 0.22352492194400 | 0.89867716103400 | 0.89531684626400 | T | T | T |
| 0.55688221071400 | 0.89868830025300 | 0.22861706338000 | T | T | T |
| 0.55687714506100 | 0.89866151943600 | 0.56194442090500 | T | T | T |
| 0.55687564463500 | 0.89868886562500 | 0.89532151897300 | T | T | T |
| 0.89022267283500 | 0.89872718863800 | 0.22862688787000 | T | T | T |
| 0.89022124009800 | 0.89869269495000 | 0.56195706190700 | T | T | T |
| 0.89021529798100 | 0.89870714487200 | 0.89533656807500 | T | T | T |
| 0.16935413640000 | 0.88733029763300 | 0.22337024950600 | T | T | T |
| 0.16934698757400 | 0.88731715278200 | 0.55669555139700 | T | T | T |
| 0.16935143603400 | 0.88733714492800 | 0.89007479061300 | T | T | T |
| 0.50270125149500 | 0.88732464720500 | 0.22336434913500 | T | T | T |
| 0.50269167940500 | 0.88732103318000 | 0.55669796745900 | T | T | T |
| 0.50270479814600 | 0.88734149174200 | 0.89006796528600 | T | T | T |
| 0.83604922074800 | 0.88735912176400 | 0.22336508126300 | T | T | T |
| 0.83604429260000 | 0.88734256424400 | 0.55669282584600 | T | T | T |
| 0.83605320307000 | 0.88736032716900 | 0.89006987047200 | T | T | T |
| 0.16050892724400 | 0.91782289722300 | 0.26881107135300 | T | T | T |
| 0.16050520028200 | 0.91783382425700 | 0.60213388345400 | T | T | T |
| 0.16049459066800 | 0.91784228317800 | 0.93552036254400 | T | T | T |
| 0.49386782587600 | 0.91782199214000 | 0.26881308409900 | T | T | T |
| 0.49385758785500 | 0.91782968337400 | 0.60214035608800 | T | T | T |
| 0.49386501201800 | 0.91784616031300 | 0.93552357921200 | T | T | T |
| 0.82721174827300 | 0.91785742634100 | 0.26881191430100 | T | T | T |
| 0.82721190703000 | 0.91784970583600 | 0.60213516092000 | T | T | T |
| 0.82720756716700 | 0.91786946511300 | 0.93552639303600 | T | T | T |
| 0.16067556060200 | 0.95401532420800 | 0.19057193532600 | T | T | T |
| 0.16066343818800 | 0.95396198730800 | 0.52388014241200 | T | T | T |
| 0.16066754613400 | 0.95400698422200 | 0.85725835261600 | T | T | T |

|                  |                  |                  |   |   |   |
|------------------|------------------|------------------|---|---|---|
| 0.49403528338600 | 0.95399821046400 | 0.19056733184700 | T | T | T |
| 0.49402095865800 | 0.95396613619500 | 0.52388413569100 | T | T | T |
| 0.49403437043300 | 0.95400406186400 | 0.85725259762500 | T | T | T |
| 0.82737364148500 | 0.95405995933800 | 0.19056883726500 | T | T | T |
| 0.82736877381500 | 0.95401071413100 | 0.52388143700300 | T | T | T |
| 0.82737209855700 | 0.95403805269400 | 0.85724793499300 | T | T | T |
| 0.06302413585870 | 0.36362560157600 | 0.23162735360000 | T | T | T |
| 0.06302535023650 | 0.36365563372800 | 0.56496226985900 | T | T | T |
| 0.06301131170480 | 0.36361468900400 | 0.89831867209800 | T | T | T |
| 0.39636545585100 | 0.36364073540300 | 0.23162437800700 | T | T | T |
| 0.39636707101300 | 0.36367431153000 | 0.56496231184500 | T | T | T |
| 0.39635907896300 | 0.36365025880500 | 0.89831847862100 | T | T | T |
| 0.72971113131600 | 0.36362604750900 | 0.23162263219300 | T | T | T |
| 0.72971044261700 | 0.36367234916700 | 0.56496385707600 | T | T | T |
| 0.72969464240600 | 0.36363183940600 | 0.89832254423800 | T | T | T |
| 0.00969694977716 | 0.37489150754900 | 0.22150325180200 | T | T | T |
| 0.00969857250872 | 0.37491371914100 | 0.55483040895800 | T | T | T |
| 0.00969467815885 | 0.37489663694000 | 0.88820675270300 | T | T | T |
| 0.34304157091300 | 0.37493323351700 | 0.22150236009700 | T | T | T |
| 0.34304130180300 | 0.37495163256600 | 0.55483282204700 | T | T | T |
| 0.34303855604500 | 0.37495087060100 | 0.88820281398200 | T | T | T |
| 0.67638031992800 | 0.37491312219600 | 0.22149409325000 | T | T | T |
| 0.67638332304900 | 0.37494100900400 | 0.55482594742200 | T | T | T |
| 0.67637305303700 | 0.37492418810800 | 0.88819726756200 | T | T | T |
| 0.32982234423500 | 0.34663756326200 | 0.26693868429200 | T | T | T |
| 0.32982475055400 | 0.34666461345600 | 0.60026113559000 | T | T | T |
| 0.32981970733200 | 0.34664409716400 | 0.93363497540200 | T | T | T |
| 0.66316938937900 | 0.34661748008500 | 0.26693187996700 | T | T | T |
| 0.66316779729300 | 0.34664103640000 | 0.60025569770300 | T | T | T |
| 0.66316025785300 | 0.34661297501000 | 0.93363639461600 | T | T | T |

|                  |                  |                  |   |   |   |
|------------------|------------------|------------------|---|---|---|
| 0.99648086771900 | 0.34659925816000 | 0.26693750285300 | T | T | T |
| 0.99648512551600 | 0.34661725140500 | 0.60026276623500 | T | T | T |
| 0.99647785698700 | 0.34659803942800 | 0.93364013213200 | T | T | T |
| 0.00067548334782 | 0.30758991656800 | 0.18974772540800 | T | T | T |
| 0.00068460583711 | 0.30762048955400 | 0.52306987225700 | T | T | T |
| 0.00067407484279 | 0.30760026038100 | 0.85644043624100 | T | T | T |
| 0.33402428964700 | 0.30762482351000 | 0.18975308443300 | T | T | T |
| 0.33403400324800 | 0.30764738218800 | 0.52307542311100 | T | T | T |
| 0.33403014952500 | 0.30762677981600 | 0.85643860550300 | T | T | T |
| 0.66737480892700 | 0.30760774586700 | 0.18974656703400 | T | T | T |
| 0.66738039866300 | 0.30763802714600 | 0.52307218563800 | T | T | T |
| 0.66736632277600 | 0.30761524103200 | 0.85644208862100 | T | T | T |
| 0.06315225609820 | 0.89930546386400 | 0.23157230584900 | T | T | T |
| 0.06315161743480 | 0.89926204683100 | 0.56490289397600 | T | T | T |
| 0.06314309397890 | 0.89932098370200 | 0.89825810984200 | T | T | T |
| 0.39649481605300 | 0.89927308891400 | 0.23157289350600 | T | T | T |
| 0.39649500326600 | 0.89922481526000 | 0.56490661200500 | T | T | T |
| 0.39649126990900 | 0.89926415567500 | 0.89825876411400 | T | T | T |
| 0.72984370934500 | 0.89929887935700 | 0.23156877523100 | T | T | T |
| 0.72983978771100 | 0.89923209385700 | 0.56490658931200 | T | T | T |
| 0.72983017141800 | 0.89928709745100 | 0.89826188172100 | T | T | T |
| 0.00991299025042 | 0.88695084826100 | 0.22173752060100 | T | T | T |
| 0.00990780029921 | 0.88694912685600 | 0.55506090075000 | T | T | T |
| 0.00991337046197 | 0.88695285453900 | 0.88844015044100 | T | T | T |
| 0.34325837207700 | 0.88692360805300 | 0.22173730679700 | T | T | T |
| 0.34325075995300 | 0.88692799361800 | 0.55506114870000 | T | T | T |
| 0.34325328272400 | 0.88692873692700 | 0.88843235740700 | T | T | T |
| 0.67660142587700 | 0.88694670957100 | 0.22172628115100 | T | T | T |
| 0.67659312406300 | 0.88694439070300 | 0.55505525761100 | T | T | T |
| 0.67659255600500 | 0.88694496792800 | 0.88842375772700 | T | T | T |

|                  |                  |                  |   |   |   |
|------------------|------------------|------------------|---|---|---|
| 0.33008789660200 | 0.91498098985000 | 0.26729305906200 | T | T | T |
| 0.33008612413400 | 0.91496567088000 | 0.60061810103800 | T | T | T |
| 0.33008326872000 | 0.91499076427200 | 0.93397529794700 | T | T | T |
| 0.66344230017300 | 0.91500104409400 | 0.26729200912000 | T | T | T |
| 0.66343109410300 | 0.91498877559200 | 0.60061690716900 | T | T | T |
| 0.66342954446000 | 0.91501854353700 | 0.93397973737500 | T | T | T |
| 0.99674549106900 | 0.91501683990100 | 0.26729337075000 | T | T | T |
| 0.99674507730100 | 0.91500790436300 | 0.60061792210300 | T | T | T |
| 0.99674347939100 | 0.91502777710100 | 0.93398187908800 | T | T | T |
| 0.00061264818653 | 0.95363432270900 | 0.18976646017200 | T | T | T |
| 0.00061745003700 | 0.95359266744500 | 0.52306174289700 | T | T | T |
| 0.00061242328267 | 0.95363681810100 | 0.85646856306300 | T | T | T |
| 0.33396501760000 | 0.95360405163400 | 0.18976088028900 | T | T | T |
| 0.33396213568500 | 0.95356855455500 | 0.52305621539000 | T | T | T |
| 0.33396082930400 | 0.95361425950200 | 0.85644907449900 | T | T | T |
| 0.66731950749000 | 0.95361825233700 | 0.18974921474900 | T | T | T |
| 0.66731073958700 | 0.95357259885400 | 0.52304362844400 | T | T | T |
| 0.66730820574800 | 0.95361864146700 | 0.85644371808000 | T | T | T |

**8) Large supercell 2-H<sup>+</sup><sub>sol</sub> FS**

POSCAR

1

|                   |                   |                   |
|-------------------|-------------------|-------------------|
| 46.81727999995964 | 0.00000000000000  | 0.00000000000000  |
| 0.00000000000000  | 30.38812199999634 | 0.00000000000000  |
| 0.00000000000000  | 0.00000000000000  | 49.65722999997833 |

Ga P H O

540 540 342 144

Direct

|                  |                  |                  |   |   |   |
|------------------|------------------|------------------|---|---|---|
| 0.12503453709700 | 0.06414191810400 | 0.05499093638400 | T | T | T |
| 0.12730502556700 | 0.06435897113100 | 0.38897165161000 | T | T | T |



|                  |                  |                  |   |   |   |
|------------------|------------------|------------------|---|---|---|
| 0.12728661235800 | 0.06461689691470 | 0.72324553201100 | T | T | T |
| 0.46053754519200 | 0.06465243174320 | 0.05667291594430 | T | T | T |
| 0.46053884331000 | 0.06464562581330 | 0.38997148098400 | T | T | T |
| 0.46062088073400 | 0.06462377017860 | 0.72327183885300 | T | T | T |
| 0.79393967790000 | 0.06463155132540 | 0.05657045234190 | T | T | T |
| 0.79391197410700 | 0.06465531828170 | 0.39002664492100 | T | T | T |
| 0.79397005622300 | 0.06463195706840 | 0.72332221979600 | T | T | T |
| 0.12518533711200 | 0.06425717358660 | 0.27648130970400 | T | T | T |
| 0.12518899024700 | 0.06468970663390 | 0.61105723161900 | T | T | T |
| 0.12517921614400 | 0.06473851908010 | 0.94443480198600 | T | T | T |
| 0.45850444250100 | 0.06476865391190 | 0.27776533475400 | T | T | T |
| 0.45852680602500 | 0.06469941118210 | 0.61106730979700 | T | T | T |
| 0.45847793335900 | 0.06471385587640 | 0.94441588224800 | T | T | T |
| 0.79182365111900 | 0.06475727512350 | 0.27780522222000 | T | T | T |
| 0.79185444586400 | 0.06468864821180 | 0.61106439111200 | T | T | T |
| 0.79183264689000 | 0.06472064592680 | 0.94442345458700 | T | T | T |
| 0.12561299291300 | 0.06446497108620 | 0.16547969108300 | T | T | T |
| 0.12528204714500 | 0.06366553435530 | 0.49686870772300 | T | T | T |
| 0.12528931828000 | 0.06365350458310 | 0.83021945571500 | T | T | T |
| 0.45860910798600 | 0.06366463177900 | 0.16354581620900 | T | T | T |
| 0.45860682760700 | 0.06363885931410 | 0.49687479425900 | T | T | T |
| 0.45859069995400 | 0.06368996654660 | 0.83022582205400 | T | T | T |
| 0.79196782026700 | 0.06369894038250 | 0.16356097828000 | T | T | T |
| 0.79194538818200 | 0.06364129610140 | 0.49687872905800 | T | T | T |
| 0.79194607943000 | 0.06367793453860 | 0.83022258558000 | T | T | T |
| 0.29198591522900 | 0.06406931363810 | 0.05458042783810 | T | T | T |
| 0.29184082698000 | 0.06424211252160 | 0.38830361300900 | T | T | T |
| 0.29191839475100 | 0.06416808980040 | 0.72153627027500 | T | T | T |
| 0.62525056340500 | 0.06415707671190 | 0.05484089102210 | T | T | T |
| 0.62517259220400 | 0.06420469896460 | 0.38825042297100 | T | T | T |

|                  |                  |                  |   |   |   |
|------------------|------------------|------------------|---|---|---|
| 0.62523979060900 | 0.06413596418140 | 0.72150407605100 | T | T | T |
| 0.95829888286800 | 0.06416703176830 | 0.05482277802440 | T | T | T |
| 0.95859673017800 | 0.06414308823000 | 0.38819019317900 | T | T | T |
| 0.95860490076500 | 0.06413221857050 | 0.72149298065600 | T | T | T |
| 0.29187511322200 | 0.06419424082190 | 0.27679570248800 | T | T | T |
| 0.29206313911800 | 0.06419903496480 | 0.60998358222300 | T | T | T |
| 0.29206790849700 | 0.06420066374530 | 0.94328966760600 | T | T | T |
| 0.62533373319600 | 0.06422340607870 | 0.27659196269800 | T | T | T |
| 0.62539014872600 | 0.06417610109820 | 0.60993698518800 | T | T | T |
| 0.62538732644100 | 0.06421048814980 | 0.94341694684900 | T | T | T |
| 0.95872915393600 | 0.06422477115770 | 0.27679314297600 | T | T | T |
| 0.95874527272800 | 0.06418519740740 | 0.60999584822300 | T | T | T |
| 0.95870061387600 | 0.06421476736340 | 0.94327677331600 | T | T | T |
| 0.29181199344200 | 0.06450819849360 | 0.16552505630600 | T | T | T |
| 0.29196166037000 | 0.06449038010550 | 0.49879246717900 | T | T | T |
| 0.29195917232200 | 0.06453145134940 | 0.83221916281200 | T | T | T |
| 0.62528666644600 | 0.06451438368180 | 0.16548197738600 | T | T | T |
| 0.62529818829000 | 0.06448404630510 | 0.49879573696800 | T | T | T |
| 0.62528406013500 | 0.06450267693660 | 0.83217621556400 | T | T | T |
| 0.95866246525900 | 0.06452529711080 | 0.16545251996600 | T | T | T |
| 0.95863703526300 | 0.06448484514130 | 0.49879789100700 | T | T | T |
| 0.95863573758000 | 0.06448678075650 | 0.83216268103200 | T | T | T |
| 0.12496922051800 | 0.19659456860300 | 0.05491667670940 | T | T | T |
| 0.12745661334400 | 0.19628414686100 | 0.38923173061000 | T | T | T |
| 0.12729996590000 | 0.19606677710800 | 0.72361185594100 | T | T | T |
| 0.46053614890800 | 0.19604133518600 | 0.05697798891910 | T | T | T |
| 0.46057684263300 | 0.19606407345700 | 0.39029247981400 | T | T | T |
| 0.46074636602900 | 0.19603890990900 | 0.72349554170500 | T | T | T |
| 0.79394227650400 | 0.19605085535000 | 0.05695931693210 | T | T | T |
| 0.79394724615700 | 0.19604976545200 | 0.39031217678200 | T | T | T |

|                  |                  |                  |   |   |   |
|------------------|------------------|------------------|---|---|---|
| 0.79407450856200 | 0.19605036021000 | 0.72350256811300 | T | T | T |
| 0.12514749226600 | 0.19648575128200 | 0.27643234516100 | T | T | T |
| 0.12522874520300 | 0.19606131950000 | 0.61100381190800 | T | T | T |
| 0.12532269299200 | 0.19625228032700 | 0.94334511444100 | T | T | T |
| 0.45852919085200 | 0.19607155216500 | 0.27764675739900 | T | T | T |
| 0.45856482986800 | 0.19606906441000 | 0.61100018952500 | T | T | T |
| 0.45849808360600 | 0.19609315563200 | 0.94429458316800 | T | T | T |
| 0.79185940696500 | 0.19606152251900 | 0.27769469834800 | T | T | T |
| 0.79188749592700 | 0.19607260084900 | 0.61099848355100 | T | T | T |
| 0.79184847013800 | 0.19608863154300 | 0.94430161451100 | T | T | T |
| 0.12553534154700 | 0.19619175855800 | 0.16557983062000 | T | T | T |
| 0.12542064568500 | 0.19840100038600 | 0.49680668870300 | T | T | T |
| 0.12538584411800 | 0.19732652312900 | 0.83039930893000 | T | T | T |
| 0.45870644780600 | 0.19732428922600 | 0.16373307953700 | T | T | T |
| 0.45878795793300 | 0.19733587161600 | 0.49697997599100 | T | T | T |
| 0.45865202229000 | 0.19853559698300 | 0.83021002254300 | T | T | T |
| 0.79205870510000 | 0.19729249387100 | 0.16373368119900 | T | T | T |
| 0.79212625509800 | 0.19735094606400 | 0.49698066974600 | T | T | T |
| 0.79201097372700 | 0.19841355707300 | 0.83023816753800 | T | T | T |
| 0.29199132875800 | 0.19657131066800 | 0.05465759947410 | T | T | T |
| 0.29185546119000 | 0.19642466530000 | 0.38832643298800 | T | T | T |
| 0.29190518036000 | 0.19647437318900 | 0.72156567930800 | T | T | T |
| 0.62524055402500 | 0.19649599229700 | 0.05487406929980 | T | T | T |
| 0.62524434859100 | 0.19649760835500 | 0.38823643028000 | T | T | T |
| 0.62522683997300 | 0.19651243248100 | 0.72152544999400 | T | T | T |
| 0.95828424203900 | 0.19648856197600 | 0.05485377308180 | T | T | T |
| 0.95858838924600 | 0.19651127796800 | 0.38820607260300 | T | T | T |
| 0.95859455626300 | 0.19652127875600 | 0.72152896967500 | T | T | T |
| 0.29184939731600 | 0.19651748582600 | 0.27679063031500 | T | T | T |
| 0.29202964834800 | 0.19653775110700 | 0.60986232385700 | T | T | T |

|                  |                  |                  |   |   |   |
|------------------|------------------|------------------|---|---|---|
| 0.29201447743800 | 0.19654374722700 | 0.94324445901600 | T | T | T |
| 0.62534847150000 | 0.19652660498500 | 0.27658527128800 | T | T | T |
| 0.62535724745300 | 0.19655156871400 | 0.60984606311100 | T | T | T |
| 0.62536443942000 | 0.19653338362200 | 0.94325318043200 | T | T | T |
| 0.95870441476500 | 0.19653469872300 | 0.27657028666900 | T | T | T |
| 0.95871504572200 | 0.19653875880300 | 0.60987903963100 | T | T | T |
| 0.95867187306400 | 0.19651415159700 | 0.94317996290100 | T | T | T |
| 0.29180520625300 | 0.19618826914400 | 0.16556717108500 | T | T | T |
| 0.29196503605700 | 0.19619398623900 | 0.49880010683200 | T | T | T |
| 0.29197303016100 | 0.19615501469800 | 0.83224185851800 | T | T | T |
| 0.62530768903800 | 0.19617696153100 | 0.16549487619800 | T | T | T |
| 0.62529994107800 | 0.19620232519000 | 0.49880116517900 | T | T | T |
| 0.62530344885900 | 0.19618826117800 | 0.83219885635000 | T | T | T |
| 0.95867219731600 | 0.19616430514000 | 0.16549148098000 | T | T | T |
| 0.95864682238000 | 0.19620743408700 | 0.49880292786500 | T | T | T |
| 0.95864234862800 | 0.19619692123800 | 0.83218095164800 | T | T | T |
| 0.99930213665800 | 0.01587870440960 | 0.00902093716907 | T | T | T |
| 0.00054919985724 | 0.01590245878200 | 0.34236328872500 | T | T | T |
| 0.00046419534519 | 0.01600199344780 | 0.67574432166000 | T | T | T |
| 0.33374967969100 | 0.01594498197310 | 0.00902215507883 | T | T | T |
| 0.33265660411300 | 0.01580840348480 | 0.34232640585700 | T | T | T |
| 0.33373899237500 | 0.01598589285740 | 0.67571411574200 | T | T | T |
| 0.66706260678100 | 0.01598123506890 | 0.00911040717819 | T | T | T |
| 0.66590710098600 | 0.01593162587930 | 0.34240179390200 | T | T | T |
| 0.66700849555900 | 0.01602783222170 | 0.67573125615700 | T | T | T |
| 0.33241292733400 | 0.01271529150050 | 0.22565628661600 | T | T | T |
| 0.33262539274200 | 0.01288326930850 | 0.55922693895600 | T | T | T |
| 0.33261860698400 | 0.01272689545160 | 0.89255187461200 | T | T | T |
| 0.66595131109200 | 0.01277610628240 | 0.22586016991500 | T | T | T |
| 0.66596893038900 | 0.01286580986200 | 0.55922563644600 | T | T | T |

|                  |                  |                  |   |   |   |
|------------------|------------------|------------------|---|---|---|
| 0.66595610475600 | 0.01277603733100 | 0.89255543221900 | T | T | T |
| 0.99927592564700 | 0.01293568922380 | 0.22593664071800 | T | T | T |
| 0.99931624198700 | 0.01285331119740 | 0.55921447406700 | T | T | T |
| 0.99930007872200 | 0.01275181674250 | 0.89255060171400 | T | T | T |
| 0.00097613906619 | 0.01578490883390 | 0.11779948726700 | T | T | T |
| 0.00072294176412 | 0.01602279453690 | 0.45107125070100 | T | T | T |
| 0.00072453585943 | 0.01599305742320 | 0.78440704304800 | T | T | T |
| 0.33242619870600 | 0.01596586774500 | 0.11776788570900 | T | T | T |
| 0.33403276396400 | 0.01600213865720 | 0.45109153212100 | T | T | T |
| 0.33404633743100 | 0.01593253025710 | 0.78439652903500 | T | T | T |
| 0.66738762457200 | 0.01599829443220 | 0.11776614198000 | T | T | T |
| 0.66738573719900 | 0.01601113565700 | 0.45108238127200 | T | T | T |
| 0.66738302895600 | 0.01598254104480 | 0.78441097741000 | T | T | T |
| 0.16608049209700 | 0.01573634000360 | 0.00909958630281 | T | T | T |
| 0.16603930064800 | 0.01556574199910 | 0.34076292107200 | T | T | T |
| 0.16613711145700 | 0.01565130912450 | 0.67580174909000 | T | T | T |
| 0.49941272728500 | 0.01565122073670 | 0.00915172823010 | T | T | T |
| 0.49925325316600 | 0.01566176772680 | 0.34246385938200 | T | T | T |
| 0.49946044621400 | 0.01566484651710 | 0.67580664488300 | T | T | T |
| 0.83271998429000 | 0.01563262950720 | 0.00914050572794 | T | T | T |
| 0.83270171338500 | 0.01557484560620 | 0.34247841153400 | T | T | T |
| 0.83282867684800 | 0.01564446075730 | 0.67580454358600 | T | T | T |
| 0.16558949835600 | 0.00844234863627 | 0.22405658147300 | T | T | T |
| 0.16557023074100 | 0.01537314087570 | 0.55924410493700 | T | T | T |
| 0.16557911137800 | 0.01534031292470 | 0.89256240806300 | T | T | T |
| 0.49888974944100 | 0.01537308796490 | 0.22591002742900 | T | T | T |
| 0.49890016713600 | 0.01538834540500 | 0.55925164982900 | T | T | T |
| 0.49888644653000 | 0.01536423108760 | 0.89258286490300 | T | T | T |
| 0.83223761270600 | 0.01532664336420 | 0.22587375079400 | T | T | T |
| 0.83224208200600 | 0.01538015188980 | 0.55924132374800 | T | T | T |

|                  |                  |                  |   |   |   |
|------------------|------------------|------------------|---|---|---|
| 0.83224109895200 | 0.01535192442000 | 0.89257494732800 | T | T | T |
| 0.16750254064400 | 0.01564571901100 | 0.11798992118800 | T | T | T |
| 0.16318980410400 | 0.98053985207900 | 0.43604696164100 | T | T | T |
| 0.16322328255400 | 0.98055314729800 | 0.76948881573000 | T | T | T |
| 0.49649328477600 | 0.98053877221900 | 0.10283723417200 | T | T | T |
| 0.49653789738400 | 0.98051758773600 | 0.43611504647500 | T | T | T |
| 0.49654361458200 | 0.98054713713200 | 0.76946346848000 | T | T | T |
| 0.82988906644000 | 0.98054720215400 | 0.10285986454800 | T | T | T |
| 0.82987385109900 | 0.98051169612200 | 0.43611402431900 | T | T | T |
| 0.82987773427700 | 0.98053529475500 | 0.76947065445800 | T | T | T |
| 0.08316428961860 | 0.01583529948930 | 0.00890626374122 | T | T | T |
| 0.08356993269160 | 0.01587346711420 | 0.34085833389000 | T | T | T |
| 0.08358321326360 | 0.01597331030540 | 0.67571986413600 | T | T | T |
| 0.41687113191700 | 0.01593226646000 | 0.00906269359324 | T | T | T |
| 0.41671415600200 | 0.01586980861320 | 0.34237712704100 | T | T | T |
| 0.41690455491700 | 0.01596855671910 | 0.67571337130500 | T | T | T |
| 0.75021438149500 | 0.01593717666990 | 0.00908400008421 | T | T | T |
| 0.75004115218300 | 0.01586817091180 | 0.34237930206400 | T | T | T |
| 0.75023084625300 | 0.01598479041860 | 0.67571574709700 | T | T | T |
| 0.08333240368570 | 0.01847869463240 | 0.22856579962300 | T | T | T |
| 0.08302550426870 | 0.01885320748460 | 0.56153975754000 | T | T | T |
| 0.08300066302820 | 0.01875744290140 | 0.89483505436200 | T | T | T |
| 0.41630083501400 | 0.01868799822090 | 0.22808729877000 | T | T | T |
| 0.41635050475000 | 0.01887699432950 | 0.56154415703500 | T | T | T |
| 0.41631675852000 | 0.01877483164690 | 0.89483406906000 | T | T | T |
| 0.74966952772400 | 0.01877423889120 | 0.22814776074700 | T | T | T |
| 0.74968701662300 | 0.01888275143710 | 0.56154914161800 | T | T | T |
| 0.74967636605800 | 0.01880318286930 | 0.89484738760400 | T | T | T |
| 0.08394220702450 | 0.01550447551240 | 0.11955962121000 | T | T | T |
| 0.08385684388040 | 0.01268529796780 | 0.45332452378900 | T | T | T |

|                  |                  |                  |   |   |   |
|------------------|------------------|------------------|---|---|---|
| 0.08380911214120 | 0.01258413074110 | 0.78675864280500 | T | T | T |
| 0.41673778618900 | 0.01250292654770 | 0.12014777354100 | T | T | T |
| 0.41709833016200 | 0.01261366019280 | 0.45342244777500 | T | T | T |
| 0.41712184791700 | 0.01258226476310 | 0.78673042660800 | T | T | T |
| 0.75048836795300 | 0.01260806777080 | 0.12012408254800 | T | T | T |
| 0.75047080987500 | 0.01260154785950 | 0.45341722112800 | T | T | T |
| 0.75046812760500 | 0.01258599955250 | 0.78673748944700 | T | T | T |
| 0.24999464217100 | 0.01584750123650 | 0.00763036762686 | T | T | T |
| 0.24954485299100 | 0.01588465753960 | 0.34079899735600 | T | T | T |
| 0.24986041201700 | 0.01596218117300 | 0.67441979459600 | T | T | T |
| 0.58317892861800 | 0.01592777831410 | 0.00781046776053 | T | T | T |
| 0.58290546210700 | 0.01597984625360 | 0.34106437939500 | T | T | T |
| 0.58317879530200 | 0.01598721041560 | 0.67442318023600 | T | T | T |
| 0.91632310043700 | 0.01593143918740 | 0.00772535081741 | T | T | T |
| 0.91653865305100 | 0.01587484324570 | 0.34107508556500 | T | T | T |
| 0.91654667471200 | 0.01594266286340 | 0.67442630985300 | T | T | T |
| 0.24832243971600 | 0.01552893314920 | 0.22818560191900 | T | T | T |
| 0.24973860671000 | 0.01884432293160 | 0.56319968462000 | T | T | T |
| 0.24976872670800 | 0.01855048448830 | 0.89640124595800 | T | T | T |
| 0.58305030583100 | 0.01876292761020 | 0.22983549417200 | T | T | T |
| 0.58306940544900 | 0.01887295138130 | 0.56322358371100 | T | T | T |
| 0.58307038855400 | 0.01873136158760 | 0.89648685133800 | T | T | T |
| 0.91641288934700 | 0.01864004014940 | 0.22977754655200 | T | T | T |
| 0.91641519682600 | 0.01882532814860 | 0.56318587564000 | T | T | T |
| 0.91640552854600 | 0.01862126382070 | 0.89642323771500 | T | T | T |
| 0.24957172903100 | 0.01568474330640 | 0.11802316342200 | T | T | T |
| 0.25216387089500 | 0.01602289578100 | 0.45108194367600 | T | T | T |
| 0.25216713735600 | 0.01597152289720 | 0.78438421784700 | T | T | T |
| 0.58549378236000 | 0.01603200497360 | 0.11777092508300 | T | T | T |
| 0.58549297334600 | 0.01604707474890 | 0.45109822720300 | T | T | T |

|                  |                  |                  |   |   |   |
|------------------|------------------|------------------|---|---|---|
| 0.58549060778900 | 0.01604531290800 | 0.78441859319400 | T | T | T |
| 0.91895440919700 | 0.01590903116710 | 0.11779581108500 | T | T | T |
| 0.91882793319900 | 0.01605081933810 | 0.45109132607100 | T | T | T |
| 0.91882598291700 | 0.01601784978300 | 0.78440318985500 | T | T | T |
| 0.04160324282410 | 0.06407831409630 | 0.05483269909710 | T | T | T |
| 0.04316509044690 | 0.06411316899660 | 0.38845699696700 | T | T | T |
| 0.04309915655630 | 0.06418197324100 | 0.72183661686700 | T | T | T |
| 0.37634353078200 | 0.06417761782010 | 0.05520650750780 | T | T | T |
| 0.37633350760000 | 0.06416926383910 | 0.38850341648300 | T | T | T |
| 0.37641568653000 | 0.06420117396920 | 0.72186454027600 | T | T | T |
| 0.70975160422300 | 0.06419248074560 | 0.05517321252540 | T | T | T |
| 0.70967722905700 | 0.06414644075510 | 0.38849339007500 | T | T | T |
| 0.70974097731700 | 0.06417173516960 | 0.72184711239600 | T | T | T |
| 0.04134272431870 | 0.06448610679750 | 0.27772828111100 | T | T | T |
| 0.04139119997120 | 0.06446673064970 | 0.61105080703500 | T | T | T |
| 0.04132615633440 | 0.06447185113290 | 0.94443614109900 | T | T | T |
| 0.37469331965400 | 0.06448303818350 | 0.27787557653400 | T | T | T |
| 0.37471219451800 | 0.06448425266260 | 0.61105436209700 | T | T | T |
| 0.37470536349100 | 0.06447524367570 | 0.94441609978200 | T | T | T |
| 0.70798345177200 | 0.06448052619730 | 0.27784231601300 | T | T | T |
| 0.70803201433100 | 0.06446792688490 | 0.61104563352100 | T | T | T |
| 0.70805322775100 | 0.06447798225080 | 0.94443095709000 | T | T | T |
| 0.04129684697020 | 0.06459660019740 | 0.16542561142300 | T | T | T |
| 0.04141646680620 | 0.06460026753230 | 0.49889014826500 | T | T | T |
| 0.04140226264880 | 0.06462671029460 | 0.83224520821800 | T | T | T |
| 0.37460478701200 | 0.06466489543130 | 0.16556828854400 | T | T | T |
| 0.37471916774300 | 0.06461653698820 | 0.49888766787200 | T | T | T |
| 0.37472545900900 | 0.06464648889180 | 0.83227308208200 | T | T | T |
| 0.70805187195500 | 0.06465479508750 | 0.16557744171800 | T | T | T |
| 0.70806224178400 | 0.06461238677150 | 0.49889122801900 | T | T | T |



|                  |                  |                   |   |   |   |
|------------------|------------------|-------------------|---|---|---|
| 0.70806916427300 | 0.06462790760940 | 0.83225832838100  | T | T | T |
| 0.20819198144700 | 0.06407808387730 | 0.05467120076980  | T | T | T |
| 0.20586754438200 | 0.06424098447270 | 0.38860265791900  | T | T | T |
| 0.20600913321900 | 0.06431453708380 | 0.72201702483300  | T | T | T |
| 0.53932237451900 | 0.06431601559230 | 0.05535189338030  | T | T | T |
| 0.53927691968300 | 0.06430539467750 | 0.38867263155500  | T | T | T |
| 0.53933541304100 | 0.06429090844060 | 0.72200250945600  | T | T | T |
| 0.87261813711800 | 0.06429744030410 | 0.05534075158150  | T | T | T |
| 0.87268112402100 | 0.06430951635180 | 0.38869795671100  | T | T | T |
| 0.87270090961500 | 0.06429645423610 | 0.72202101216300  | T | T | T |
| 0.20798209106200 | 0.06405984459110 | 0.27675231871100  | T | T | T |
| 0.20793995937600 | 0.06436545597160 | 0.61109218521700  | T | T | T |
| 0.20796745036300 | 0.06439530972670 | 0.94442315816800  | T | T | T |
| 0.54126167559000 | 0.06437131055900 | 0.27773808756500  | T | T | T |
| 0.54128037763300 | 0.06436806146260 | 0.61108846397500  | T | T | T |
| 0.54126837790600 | 0.06437765461220 | 0.94443805718000  | T | T | T |
| 0.87460192734900 | 0.06441175633940 | 0.27781565078200  | T | T | T |
| 0.87462178779900 | 0.06437312226260 | 0.61109995286200  | T | T | T |
| 0.87459728866900 | 0.06436990481660 | 0.94443349327600  | T | T | T |
| 0.20780406828400 | 0.06416933445900 | 0.16544189907400  | T | T | T |
| 0.20824795491600 | 0.06598721199480 | 0.49902390570000  | T | T | T |
| 0.20825310635000 | 0.06629029656840 | 0.83242034347000  | T | T | T |
| 0.54158375045100 | 0.06630787491820 | 0.16573393274800  | T | T | T |
| 0.54158988737200 | 0.06618425577330 | 0.49905365137600  | T | T | T |
| 0.54155924888600 | 0.06626150906140 | 0.83240485245000  | T | T | T |
| 0.87496171287200 | 0.06644602874250 | 0.16576727220000  | T | T | T |
| 0.87491825601500 | 0.06617386530040 | 0.49904560873700  | T | T | T |
| 0.87492889157200 | 0.06630142745020 | 0.83241106849600  | T | T | T |
| 0.00000000000000 | 0.13043999673400 | 0.00000000000000  | F | F | F |
| 0.00000000000000 | 0.13043999673400 | 0.333333333333400 | F | F | F |

|                    |                  |                    |   |   |   |
|--------------------|------------------|--------------------|---|---|---|
| 0.0000000000000000 | 0.13043999673400 | 0.666666666666600  | F | F | F |
| 0.333333333333400  | 0.13043999673400 | 0.0000000000000000 | F | F | F |
| 0.333333333333400  | 0.13043999673400 | 0.333333333333400  | F | F | F |
| 0.333333333333400  | 0.13043999673400 | 0.666666666666600  | F | F | F |
| 0.666666666666600  | 0.13043999673400 | 0.0000000000000000 | F | F | F |
| 0.666666666666600  | 0.13043999673400 | 0.333333333333400  | F | F | F |
| 0.666666666666600  | 0.13043999673400 | 0.666666666666600  | F | F | F |
| 0.0000000000000000 | 0.13043999673400 | 0.22222334138000   | F | F | F |
| 0.0000000000000000 | 0.13043999673400 | 0.55555667471300   | F | F | F |
| 0.0000000000000000 | 0.13043999673400 | 0.88889000804700   | F | F | F |
| 0.333333333333400  | 0.13043999673400 | 0.22222334138000   | F | F | F |
| 0.333333333333400  | 0.13043999673400 | 0.55555667471300   | F | F | F |
| 0.333333333333400  | 0.13043999673400 | 0.88889000804700   | F | F | F |
| 0.666666666666600  | 0.13043999673400 | 0.22222334138000   | F | F | F |
| 0.666666666666600  | 0.13043999673400 | 0.55555667471300   | F | F | F |
| 0.666666666666600  | 0.13043999673400 | 0.88889000804700   | F | F | F |
| 0.0000000000000000 | 0.13043999673400 | 0.11111000180100   | F | F | F |
| 0.0000000000000000 | 0.13043999673400 | 0.44444333513300   | F | F | F |
| 0.0000000000000000 | 0.13043999673400 | 0.77777666846700   | F | F | F |
| 0.333333333333400  | 0.13043999673400 | 0.11111000180100   | F | F | F |
| 0.333333333333400  | 0.13043999673400 | 0.44444333513300   | F | F | F |
| 0.333333333333400  | 0.13043999673400 | 0.77777666846700   | F | F | F |
| 0.666666666666600  | 0.13043999673400 | 0.11111000180100   | F | F | F |
| 0.666666666666600  | 0.13043999673400 | 0.44444333513300   | F | F | F |
| 0.666666666666600  | 0.13043999673400 | 0.77777666846700   | F | F | F |
| 0.166666666667500  | 0.13043999673400 | 0.0000000000000000 | F | F | F |
| 0.166666666667500  | 0.13043999673400 | 0.333333333333400  | F | F | F |
| 0.166666666667500  | 0.13043999673400 | 0.666666666666600  | F | F | F |
| 0.500000000000900  | 0.13043999673400 | 0.0000000000000000 | F | F | F |
| 0.500000000000900  | 0.13043999673400 | 0.333333333333400  | F | F | F |

|                  |                  |                  |   |   |   |
|------------------|------------------|------------------|---|---|---|
| 0.50000000000900 | 0.13043999673400 | 0.66666666666600 | F | F | F |
| 0.83333333334100 | 0.13043999673400 | 0.00000000000000 | F | F | F |
| 0.83333333334100 | 0.13043999673400 | 0.33333333333400 | F | F | F |
| 0.83333333334100 | 0.13043999673400 | 0.66666666666600 | F | F | F |
| 0.16666666667500 | 0.13043999673400 | 0.22222334138000 | F | F | F |
| 0.16666666667500 | 0.13043999673400 | 0.55555667471300 | F | F | F |
| 0.16666666667500 | 0.13043999673400 | 0.88889000804700 | F | F | F |
| 0.50000000000900 | 0.13043999673400 | 0.22222334138000 | F | F | F |
| 0.50000000000900 | 0.13043999673400 | 0.55555667471300 | F | F | F |
| 0.50000000000900 | 0.13043999673400 | 0.88889000804700 | F | F | F |
| 0.83333333334100 | 0.13043999673400 | 0.22222334138000 | F | F | F |
| 0.83333333334100 | 0.13043999673400 | 0.55555667471300 | F | F | F |
| 0.83333333334100 | 0.13043999673400 | 0.88889000804700 | F | F | F |
| 0.16666666667500 | 0.13043999673400 | 0.11111000180100 | F | F | F |
| 0.16666666667500 | 0.13043999673400 | 0.44444333513300 | F | F | F |
| 0.16666666667500 | 0.13043999673400 | 0.77777666846700 | F | F | F |
| 0.50000000000900 | 0.13043999673400 | 0.11111000180100 | F | F | F |
| 0.50000000000900 | 0.13043999673400 | 0.44444333513300 | F | F | F |
| 0.50000000000900 | 0.13043999673400 | 0.77777666846700 | F | F | F |
| 0.83333333334100 | 0.13043999673400 | 0.11111000180100 | F | F | F |
| 0.83333333334100 | 0.13043999673400 | 0.44444333513300 | F | F | F |
| 0.83333333334100 | 0.13043999673400 | 0.77777666846700 | F | F | F |
| 0.08333333332670 | 0.13043999673400 | 0.00000000000000 | F | F | F |
| 0.08333333332670 | 0.13043999673400 | 0.33333333333400 | F | F | F |
| 0.08333333332670 | 0.13043999673400 | 0.66666666666600 | F | F | F |
| 0.41666666666100 | 0.13043999673400 | 0.00000000000000 | F | F | F |
| 0.41666666666100 | 0.13043999673400 | 0.33333333333400 | F | F | F |
| 0.41666666666100 | 0.13043999673400 | 0.66666666666600 | F | F | F |
| 0.74999999999300 | 0.13043999673400 | 0.00000000000000 | F | F | F |
| 0.74999999999300 | 0.13043999673400 | 0.33333333333400 | F | F | F |

|                 |                  |                  |   |   |   |
|-----------------|------------------|------------------|---|---|---|
| 0.7499999999300 | 0.13043999673400 | 0.66666666666600 | F | F | F |
| 0.0833333332670 | 0.13043999673400 | 0.22222334138000 | F | F | F |
| 0.0833333332670 | 0.13043999673400 | 0.55555667471300 | F | F | F |
| 0.0833333332670 | 0.13043999673400 | 0.88889000804700 | F | F | F |
| 0.4166666666100 | 0.13043999673400 | 0.22222334138000 | F | F | F |
| 0.4166666666100 | 0.13043999673400 | 0.55555667471300 | F | F | F |
| 0.4166666666100 | 0.13043999673400 | 0.88889000804700 | F | F | F |
| 0.7499999999300 | 0.13043999673400 | 0.22222334138000 | F | F | F |
| 0.7499999999300 | 0.13043999673400 | 0.55555667471300 | F | F | F |
| 0.7499999999300 | 0.13043999673400 | 0.88889000804700 | F | F | F |
| 0.0833333332670 | 0.13043999673400 | 0.11111000180100 | F | F | F |
| 0.0833333332670 | 0.13043999673400 | 0.44444333513300 | F | F | F |
| 0.0833333332670 | 0.13043999673400 | 0.77777666846700 | F | F | F |
| 0.4166666666100 | 0.13043999673400 | 0.11111000180100 | F | F | F |
| 0.4166666666100 | 0.13043999673400 | 0.44444333513300 | F | F | F |
| 0.4166666666100 | 0.13043999673400 | 0.77777666846700 | F | F | F |
| 0.7499999999300 | 0.13043999673400 | 0.11111000180100 | F | F | F |
| 0.7499999999300 | 0.13043999673400 | 0.44444333513300 | F | F | F |
| 0.7499999999300 | 0.13043999673400 | 0.77777666846700 | F | F | F |
| 0.2500000008900 | 0.13043999673400 | 0.00000000000000 | F | F | F |
| 0.2500000008900 | 0.13043999673400 | 0.33333333333400 | F | F | F |
| 0.2500000008900 | 0.13043999673400 | 0.66666666666600 | F | F | F |
| 0.5833333342100 | 0.13043999673400 | 0.00000000000000 | F | F | F |
| 0.5833333342100 | 0.13043999673400 | 0.33333333333400 | F | F | F |
| 0.5833333342100 | 0.13043999673400 | 0.66666666666600 | F | F | F |
| 0.9166666675500 | 0.13043999673400 | 0.00000000000000 | F | F | F |
| 0.9166666675500 | 0.13043999673400 | 0.33333333333400 | F | F | F |
| 0.9166666675500 | 0.13043999673400 | 0.66666666666600 | F | F | F |
| 0.2500000008900 | 0.13043999673400 | 0.22222334138000 | F | F | F |
| 0.2500000008900 | 0.13043999673400 | 0.55555667471300 | F | F | F |

|                  |                  |                  |   |   |   |
|------------------|------------------|------------------|---|---|---|
| 0.25000000008900 | 0.13043999673400 | 0.88889000804700 | F | F | F |
| 0.58333333342100 | 0.13043999673400 | 0.22222334138000 | F | F | F |
| 0.58333333342100 | 0.13043999673400 | 0.55555667471300 | F | F | F |
| 0.58333333342100 | 0.13043999673400 | 0.88889000804700 | F | F | F |
| 0.91666666675500 | 0.13043999673400 | 0.22222334138000 | F | F | F |
| 0.91666666675500 | 0.13043999673400 | 0.55555667471300 | F | F | F |
| 0.91666666675500 | 0.13043999673400 | 0.88889000804700 | F | F | F |
| 0.25000000008900 | 0.13043999673400 | 0.11111000180100 | F | F | F |
| 0.25000000008900 | 0.13043999673400 | 0.44444333513300 | F | F | F |
| 0.25000000008900 | 0.13043999673400 | 0.77777666846700 | F | F | F |
| 0.58333333342100 | 0.13043999673400 | 0.11111000180100 | F | F | F |
| 0.58333333342100 | 0.13043999673400 | 0.44444333513300 | F | F | F |
| 0.58333333342100 | 0.13043999673400 | 0.77777666846700 | F | F | F |
| 0.91666666675500 | 0.13043999673400 | 0.11111000180100 | F | F | F |
| 0.91666666675500 | 0.13043999673400 | 0.44444333513300 | F | F | F |
| 0.91666666675500 | 0.13043999673400 | 0.77777666846700 | F | F | F |
| 0.04165589286090 | 0.19666315119300 | 0.05473130752440 | T | T | T |
| 0.04319196792390 | 0.19653325955700 | 0.38849243316500 | T | T | T |
| 0.04318927869370 | 0.19650315326400 | 0.72193069741600 | T | T | T |
| 0.37645671985400 | 0.19649547857100 | 0.05532462483500 | T | T | T |
| 0.37646084561300 | 0.19652549688200 | 0.38860694793800 | T | T | T |
| 0.37642304283000 | 0.19644881144500 | 0.72188243736800 | T | T | T |
| 0.70984791185700 | 0.19648419937200 | 0.05527847496540 | T | T | T |
| 0.70984462976900 | 0.19647921925100 | 0.38863509771200 | T | T | T |
| 0.70976061568800 | 0.19648283473100 | 0.72186782260000 | T | T | T |
| 0.04136970759090 | 0.19631711761500 | 0.27760704912300 | T | T | T |
| 0.04136981493150 | 0.19627280048300 | 0.61102145605800 | T | T | T |
| 0.04127068928180 | 0.19632923983400 | 0.94418806644000 | T | T | T |
| 0.37469908258600 | 0.19633901001300 | 0.27776641098100 | T | T | T |
| 0.37469853273300 | 0.19627493400900 | 0.61100887095500 | T | T | T |

|                  |                  |                  |   |   |   |
|------------------|------------------|------------------|---|---|---|
| 0.37470308858700 | 0.19631562213900 | 0.94433119566000 | T | T | T |
| 0.70804269441600 | 0.19628924029000 | 0.27771005117700 | T | T | T |
| 0.70801569814400 | 0.19628698131200 | 0.61100423619000 | T | T | T |
| 0.70804671550300 | 0.19631066016400 | 0.94435044238800 | T | T | T |
| 0.04138232476710 | 0.19607574574100 | 0.16552735376500 | T | T | T |
| 0.04144217766400 | 0.19608262056200 | 0.49892181373600 | T | T | T |
| 0.04148841292380 | 0.19603329244800 | 0.83238894204200 | T | T | T |
| 0.37466841592600 | 0.19605124505400 | 0.16572105810900 | T | T | T |
| 0.37469455383900 | 0.19601774191100 | 0.49896940476400 | T | T | T |
| 0.37486383489200 | 0.19607574324300 | 0.83236674328300 | T | T | T |
| 0.70812335143200 | 0.19601323446500 | 0.16571743234800 | T | T | T |
| 0.70803692721200 | 0.19602364758200 | 0.49896926916000 | T | T | T |
| 0.70820548911800 | 0.19608577662400 | 0.83235556310200 | T | T | T |
| 0.20816408853300 | 0.19660256843800 | 0.05468070253640 | T | T | T |
| 0.20580554968200 | 0.19643436650700 | 0.38867556836900 | T | T | T |
| 0.20588661160800 | 0.19635292783500 | 0.72209585460800 | T | T | T |
| 0.53920084313300 | 0.19634647110800 | 0.05543269440910 | T | T | T |
| 0.53921451172600 | 0.19636262374100 | 0.38875426235600 | T | T | T |
| 0.53921689949800 | 0.19636912964700 | 0.72208443528600 | T | T | T |
| 0.87250301284700 | 0.19636508883700 | 0.05541558162970 | T | T | T |
| 0.87256396049700 | 0.19635154602700 | 0.38877954758600 | T | T | T |
| 0.87258029573300 | 0.19636598409700 | 0.72209630487900 | T | T | T |
| 0.20795557466200 | 0.19677495599000 | 0.27656936336700 | T | T | T |
| 0.20796217081700 | 0.19649595922900 | 0.61078176687100 | T | T | T |
| 0.20796759706400 | 0.19666169658900 | 0.94335652064200 | T | T | T |
| 0.54129038242200 | 0.19650478837600 | 0.27739617593700 | T | T | T |
| 0.54129583587700 | 0.19650401675600 | 0.61074752552600 | T | T | T |
| 0.54128430676900 | 0.19648659667500 | 0.94416070935200 | T | T | T |
| 0.87463272046600 | 0.19645022106200 | 0.27756115959600 | T | T | T |
| 0.87464053191400 | 0.19648106355700 | 0.61082073467600 | T | T | T |

|                  |                  |                  |   |   |   |
|------------------|------------------|------------------|---|---|---|
| 0.87460856112500 | 0.19650656092900 | 0.94413054463200 | T | T | T |
| 0.20778775201500 | 0.19648921846000 | 0.16546967091800 | T | T | T |
| 0.20804805893000 | 0.19572351314200 | 0.49892462550200 | T | T | T |
| 0.20807880878400 | 0.19566413951000 | 0.83231016943000 | T | T | T |
| 0.54138973769500 | 0.19568638947200 | 0.16560583924300 | T | T | T |
| 0.54139354029300 | 0.19570133070100 | 0.49892784147800 | T | T | T |
| 0.54136205056800 | 0.19571221708900 | 0.83228434692100 | T | T | T |
| 0.87473683890400 | 0.19567942487300 | 0.16562438768100 | T | T | T |
| 0.87472295387900 | 0.19570136044700 | 0.49892358571400 | T | T | T |
| 0.87471879474300 | 0.19572867757800 | 0.83228243725400 | T | T | T |
| 0.99928858359300 | 0.24469677762100 | 0.00894927843598 | T | T | T |
| 0.00056322451087 | 0.24466119188200 | 0.34232012664600 | T | T | T |
| 0.00046785864806 | 0.24459716481700 | 0.67574672506100 | T | T | T |
| 0.33375642859900 | 0.24463413859300 | 0.00901926563399 | T | T | T |
| 0.33269277410700 | 0.24475505657800 | 0.34234213693900 | T | T | T |
| 0.33372780968500 | 0.24461488789900 | 0.67571053222000 | T | T | T |
| 0.66707587970900 | 0.24460366021500 | 0.00910554218921 | T | T | T |
| 0.66707273837800 | 0.24464662773500 | 0.34239234716000 | T | T | T |
| 0.66698344207200 | 0.24458082235100 | 0.67572911343400 | T | T | T |
| 0.33237798072000 | 0.24812710417900 | 0.22580184256900 | T | T | T |
| 0.33266936203400 | 0.24791472993400 | 0.55922850297900 | T | T | T |
| 0.33266540159000 | 0.24803465063200 | 0.89257687981600 | T | T | T |
| 0.66600002906900 | 0.24802772937500 | 0.22588115100100 | T | T | T |
| 0.66601419229100 | 0.24791476739700 | 0.55923127860800 | T | T | T |
| 0.66602807299000 | 0.24799349651500 | 0.89256347263800 | T | T | T |
| 0.99935480919200 | 0.24798230736200 | 0.22593671481800 | T | T | T |
| 0.99937932005500 | 0.24788316780100 | 0.55921972658300 | T | T | T |
| 0.99933200871600 | 0.24804368256000 | 0.89256405397600 | T | T | T |
| 0.00098039762123 | 0.24480119543200 | 0.11783070786000 | T | T | T |
| 0.00071726472938 | 0.24457260804100 | 0.45107972711800 | T | T | T |

|                  |                  |                  |   |   |   |
|------------------|------------------|------------------|---|---|---|
| 0.00071931445980 | 0.24461412189100 | 0.78445287314500 | T | T | T |
| 0.33240349011600 | 0.24464997474800 | 0.11781858029800 | T | T | T |
| 0.33401894006800 | 0.24460714354600 | 0.45112414872000 | T | T | T |
| 0.33405090958300 | 0.24465624689000 | 0.78441606936200 | T | T | T |
| 0.66738583209100 | 0.24461322857100 | 0.11780687534000 | T | T | T |
| 0.66737770434400 | 0.24460268712900 | 0.45111822910700 | T | T | T |
| 0.66739978773600 | 0.24460476912000 | 0.78443173489100 | T | T | T |
| 0.16604912150000 | 0.24469117136100 | 0.00871100056887 | T | T | T |
| 0.16612826219300 | 0.24499328940700 | 0.34077438069800 | T | T | T |
| 0.16611519484300 | 0.24489235588500 | 0.67580450454100 | T | T | T |
| 0.49939897584900 | 0.24489366989600 | 0.00914781538538 | T | T | T |
| 0.49936353925700 | 0.24489542813000 | 0.34246761127300 | T | T | T |
| 0.49946852108400 | 0.24488822229500 | 0.67579753717400 | T | T | T |
| 0.83269990329800 | 0.24489959089400 | 0.00913899320978 | T | T | T |
| 0.83279714295700 | 0.24495934196300 | 0.34246795155300 | T | T | T |
| 0.83283688580200 | 0.24491860789800 | 0.67579242104800 | T | T | T |
| 0.16557088065900 | 0.25237326670800 | 0.22408631834200 | T | T | T |
| 0.16557637757600 | 0.24767078993000 | 0.55915698496900 | T | T | T |
| 0.16562682481500 | 0.24796501940700 | 0.89234163171300 | T | T | T |
| 0.49890133073700 | 0.24779892573900 | 0.22578898767000 | T | T | T |
| 0.49890072232800 | 0.24771166353900 | 0.55913782123600 | T | T | T |
| 0.49892942531700 | 0.24776065908200 | 0.89250344399100 | T | T | T |
| 0.83226937264500 | 0.24784145720800 | 0.22577550729100 | T | T | T |
| 0.83224421253700 | 0.24771898146800 | 0.55913101450000 | T | T | T |
| 0.83227824214000 | 0.24779016867300 | 0.89249713210300 | T | T | T |
| 0.16750949992700 | 0.24495371770800 | 0.11801690147000 | T | T | T |
| 0.16319707904500 | 0.28271054438200 | 0.43601466506800 | T | T | T |
| 0.16317471109100 | 0.28268411735900 | 0.76953632841200 | T | T | T |
| 0.49643645270800 | 0.28268931752800 | 0.10288236949800 | T | T | T |
| 0.49648819241200 | 0.28270996521900 | 0.43617424446100 | T | T | T |



|                  |                  |                  |   |   |   |
|------------------|------------------|------------------|---|---|---|
| 0.49654262181500 | 0.28273755953800 | 0.76942585211600 | T | T | T |
| 0.82982981600500 | 0.28269313394000 | 0.10288179192100 | T | T | T |
| 0.82982052696500 | 0.28271799812500 | 0.43617232896600 | T | T | T |
| 0.82987398616700 | 0.28272952503200 | 0.76941861164600 | T | T | T |
| 0.08316920473500 | 0.24475494986300 | 0.00756348897987 | T | T | T |
| 0.08361326814340 | 0.24473300868300 | 0.34090681762900 | T | T | T |
| 0.08358428543010 | 0.24460457715100 | 0.67573320420100 | T | T | T |
| 0.41687003660800 | 0.24465593016300 | 0.00906372551545 | T | T | T |
| 0.41674423920500 | 0.24471111211000 | 0.34237375317800 | T | T | T |
| 0.41690932936300 | 0.24461410493900 | 0.67571575558900 | T | T | T |
| 0.75022098996000 | 0.24464736539800 | 0.00908686954127 | T | T | T |
| 0.75024449799500 | 0.24470393627500 | 0.34237487164700 | T | T | T |
| 0.75022975073200 | 0.24460951729000 | 0.67570897109300 | T | T | T |
| 0.08333026787830 | 0.24469702209500 | 0.22840737538000 | T | T | T |
| 0.08297810013730 | 0.24221266122500 | 0.56154974254500 | T | T | T |
| 0.08296722953260 | 0.24467643266100 | 0.89465119183300 | T | T | T |
| 0.41622288915300 | 0.24457915136200 | 0.22803336868300 | T | T | T |
| 0.41632209606900 | 0.24213339632700 | 0.56155801017200 | T | T | T |
| 0.41628330048100 | 0.24460869838200 | 0.89470813103100 | T | T | T |
| 0.74966443100300 | 0.24456396705900 | 0.22804062727800 | T | T | T |
| 0.74965626537100 | 0.24211676392800 | 0.56155956820900 | T | T | T |
| 0.74965228361800 | 0.24457675209000 | 0.89472523209000 | T | T | T |
| 0.08392338318020 | 0.24512744664100 | 0.11953557511700 | T | T | T |
| 0.08386065882850 | 0.24811270480600 | 0.45334784498400 | T | T | T |
| 0.08381508615760 | 0.24809598572800 | 0.78794759981900 | T | T | T |
| 0.41674419172400 | 0.24819426088100 | 0.12140071230000 | T | T | T |
| 0.41712614278300 | 0.24806140241800 | 0.45466607241400 | T | T | T |
| 0.41711993642300 | 0.24819831810400 | 0.78672022082000 | T | T | T |
| 0.75049749493400 | 0.24809402491900 | 0.12136062417500 | T | T | T |
| 0.75050731171900 | 0.24807820662700 | 0.45467085619900 | T | T | T |

|                  |                  |                  |   |   |   |
|------------------|------------------|------------------|---|---|---|
| 0.75049750393500 | 0.24820042845000 | 0.78677310362600 | T | T | T |
| 0.24996630062300 | 0.24467485049800 | 0.00748935743223 | T | T | T |
| 0.24957893281700 | 0.24468475324000 | 0.34078763690500 | T | T | T |
| 0.24985373658500 | 0.24463655791300 | 0.67434815524300 | T | T | T |
| 0.58317900647700 | 0.24466996121800 | 0.00771760943816 | T | T | T |
| 0.58316392898900 | 0.24465285764900 | 0.34101900750400 | T | T | T |
| 0.58316812162900 | 0.24461258783000 | 0.67434473392400 | T | T | T |
| 0.91631701331600 | 0.24467658692400 | 0.00764584247247 | T | T | T |
| 0.91654654253700 | 0.24470401176800 | 0.34099893051300 | T | T | T |
| 0.91654676147500 | 0.24465246274500 | 0.67435653675700 | T | T | T |
| 0.24813991548400 | 0.24514454971800 | 0.22819979315000 | T | T | T |
| 0.24970780299200 | 0.24466476871400 | 0.56170831425300 | T | T | T |
| 0.24977909832500 | 0.24506973566600 | 0.89488176169600 | T | T | T |
| 0.58305380409700 | 0.24480387472100 | 0.22832418491600 | T | T | T |
| 0.58304890712600 | 0.24465590129600 | 0.56171743330000 | T | T | T |
| 0.58305433406000 | 0.24485594670700 | 0.89496532076200 | T | T | T |
| 0.91639690741200 | 0.24488109267000 | 0.22831065474900 | T | T | T |
| 0.91638687047100 | 0.24467375998500 | 0.56169747847300 | T | T | T |
| 0.91638170894700 | 0.24493180922900 | 0.89493970505900 | T | T | T |
| 0.24957327799600 | 0.24491748797400 | 0.11804075237500 | T | T | T |
| 0.25215354251000 | 0.24468315905800 | 0.45107726553400 | T | T | T |
| 0.25218642969800 | 0.24473730721500 | 0.78437330999400 | T | T | T |
| 0.58551024999200 | 0.24468420666900 | 0.11775659691300 | T | T | T |
| 0.58550068103500 | 0.24465531814600 | 0.45108434213700 | T | T | T |
| 0.58549695202500 | 0.24467881686300 | 0.78439600177600 | T | T | T |
| 0.91898616061500 | 0.24479507298500 | 0.11777286472600 | T | T | T |
| 0.91882239853700 | 0.24465829516600 | 0.45106542121800 | T | T | T |
| 0.91884266253100 | 0.24470587891700 | 0.78439371400800 | T | T | T |
| 0.12462857045800 | 0.99465268931500 | 0.03179872210840 | T | T | T |
| 0.12490503697500 | 0.99536602984500 | 0.36422585501000 | T | T | T |

|                  |                  |                  |   |   |   |
|------------------|------------------|------------------|---|---|---|
| 0.12492833319800 | 0.99508222581200 | 0.69881050222800 | T | T | T |
| 0.45819880796100 | 0.99518653542500 | 0.03220953558820 | T | T | T |
| 0.45803147619100 | 0.99513783651700 | 0.36551908783900 | T | T | T |
| 0.45822113719500 | 0.99511520338200 | 0.69882068613600 | T | T | T |
| 0.79154251134100 | 0.99510042009800 | 0.03218789785280 | T | T | T |
| 0.79141789373200 | 0.99518980704600 | 0.36553617655300 | T | T | T |
| 0.79158181627700 | 0.99516253032400 | 0.69882526280700 | T | T | T |
| 0.12436850348700 | 0.99739403627400 | 0.25147131494400 | T | T | T |
| 0.12447592982800 | 0.99835196508400 | 0.58448175379100 | T | T | T |
| 0.12446561388000 | 0.99862216862600 | 0.91787103221600 | T | T | T |
| 0.45773230462400 | 0.99853929611500 | 0.25115938151700 | T | T | T |
| 0.45778597905100 | 0.99836965837400 | 0.58447609733800 | T | T | T |
| 0.45774862900300 | 0.99848483675900 | 0.91779689087000 | T | T | T |
| 0.79111351917000 | 0.99852198788900 | 0.25117717327800 | T | T | T |
| 0.79114687609300 | 0.99835880101300 | 0.58446439298900 | T | T | T |
| 0.79111428409500 | 0.99848297088200 | 0.91781009893300 | T | T | T |
| 0.12607528308200 | 0.99522038543900 | 0.14191095109800 | T | T | T |
| 0.12580969762600 | 0.99519182374700 | 0.47501863073000 | T | T | T |
| 0.12582907175300 | 0.99515894165000 | 0.80836340651400 | T | T | T |
| 0.45880513528900 | 0.99514206960900 | 0.14172585412400 | T | T | T |
| 0.45913193928700 | 0.99519885348200 | 0.47495908819100 | T | T | T |
| 0.45911290150600 | 0.99521304555300 | 0.80833153746700 | T | T | T |
| 0.79249329322200 | 0.99515382403400 | 0.14180934585700 | T | T | T |
| 0.79249572727600 | 0.99518770479200 | 0.47497577808800 | T | T | T |
| 0.79246430821100 | 0.99518561345200 | 0.80833906081200 | T | T | T |
| 0.29153354666800 | 0.99499777174500 | 0.03090045921280 | T | T | T |
| 0.29088617615800 | 0.99518968703600 | 0.36456368743900 | T | T | T |
| 0.29154548367800 | 0.99523248612400 | 0.69767429484300 | T | T | T |
| 0.62485642486400 | 0.99519516909000 | 0.03103514832940 | T | T | T |
| 0.62418278789800 | 0.99494300397900 | 0.36464236582700 | T | T | T |

|                  |                  |                  |   |   |   |
|------------------|------------------|------------------|---|---|---|
| 0.62483454345300 | 0.99516258318000 | 0.69765338917800 | T | T | T |
| 0.95762307373500 | 0.99494309963600 | 0.03129678404710 | T | T | T |
| 0.95825214216000 | 0.99525850576800 | 0.36428677285100 | T | T | T |
| 0.95823386661000 | 0.99516906291800 | 0.69763476540100 | T | T | T |
| 0.29096569166400 | 0.99675882326300 | 0.25078372387200 | T | T | T |
| 0.29156362381700 | 0.99614611910300 | 0.58458361746100 | T | T | T |
| 0.29151768051700 | 0.99621759166500 | 0.91795297295900 | T | T | T |
| 0.62488171575900 | 0.99616409809000 | 0.25124756174300 | T | T | T |
| 0.62489973185100 | 0.99610879892600 | 0.58454339859400 | T | T | T |
| 0.62486533150000 | 0.99623294081200 | 0.91794121244200 | T | T | T |
| 0.95817780440600 | 0.99623682079700 | 0.25130199243500 | T | T | T |
| 0.95823540389200 | 0.99614930940600 | 0.58456084738800 | T | T | T |
| 0.95819690191400 | 0.99619001800200 | 0.91791540040200 | T | T | T |
| 0.29140486368500 | 0.99567268037600 | 0.14145763458100 | T | T | T |
| 0.29284045164300 | 0.99523563313200 | 0.47479863494700 | T | T | T |
| 0.29283189502400 | 0.99532379941200 | 0.80819163977400 | T | T | T |
| 0.62619350233100 | 0.99524973942500 | 0.14152250779000 | T | T | T |
| 0.62617821601400 | 0.99523448562600 | 0.47477326630300 | T | T | T |
| 0.62617505253400 | 0.99526209898200 | 0.80814661145000 | T | T | T |
| 0.95982053218800 | 0.99522459825600 | 0.14160321577200 | T | T | T |
| 0.95951128550000 | 0.99524250998300 | 0.47478731074300 | T | T | T |
| 0.95951216224800 | 0.99524339113700 | 0.80812756733700 | T | T | T |
| 0.12500000000200 | 0.13043999673400 | 0.02777666599470 | F | F | F |
| 0.12500000000200 | 0.13043999673400 | 0.36110999932900 | F | F | F |
| 0.12500000000200 | 0.13043999673400 | 0.69444333266100 | F | F | F |
| 0.45833333333400 | 0.13043999673400 | 0.02777666599470 | F | F | F |
| 0.45833333333400 | 0.13043999673400 | 0.36110999932900 | F | F | F |
| 0.45833333333400 | 0.13043999673400 | 0.69444333266100 | F | F | F |
| 0.79166666666800 | 0.13043999673400 | 0.02777666599470 | F | F | F |
| 0.79166666666800 | 0.13043999673400 | 0.36110999932900 | F | F | F |

|                  |                  |                  |   |   |   |
|------------------|------------------|------------------|---|---|---|
| 0.79166666666800 | 0.13043999673400 | 0.69444333266100 | F | F | F |
| 0.12500000000200 | 0.13043999673400 | 0.24999999994900 | F | F | F |
| 0.12500000000200 | 0.13043999673400 | 0.58333333328300 | F | F | F |
| 0.12500000000200 | 0.13043999673400 | 0.91666666661700 | F | F | F |
| 0.45833333333400 | 0.13043999673400 | 0.24999999994900 | F | F | F |
| 0.45833333333400 | 0.13043999673400 | 0.58333333328300 | F | F | F |
| 0.45833333333400 | 0.13043999673400 | 0.91666666661700 | F | F | F |
| 0.79166666666800 | 0.13043999673400 | 0.24999999994900 | F | F | F |
| 0.79166666666800 | 0.13043999673400 | 0.58333333328300 | F | F | F |
| 0.79166666666800 | 0.13043999673400 | 0.91666666661700 | F | F | F |
| 0.12500000000200 | 0.13043999673400 | 0.13888999819000 | F | F | F |
| 0.12500000000200 | 0.13043999673400 | 0.47222333152400 | F | F | F |
| 0.12500000000200 | 0.13043999673400 | 0.80555666485600 | F | F | F |
| 0.45833333333400 | 0.13043999673400 | 0.13888999819000 | F | F | F |
| 0.45833333333400 | 0.13043999673400 | 0.47222333152400 | F | F | F |
| 0.45833333333400 | 0.13043999673400 | 0.80555666485600 | F | F | F |
| 0.79166666666800 | 0.13043999673400 | 0.13888999819000 | F | F | F |
| 0.79166666666800 | 0.13043999673400 | 0.47222333152400 | F | F | F |
| 0.79166666666800 | 0.13043999673400 | 0.80555666485600 | F | F | F |
| 0.29166666669900 | 0.13043999673400 | 0.02777666599470 | F | F | F |
| 0.29166666669900 | 0.13043999673400 | 0.36110999932900 | F | F | F |
| 0.29166666669900 | 0.13043999673400 | 0.69444333266100 | F | F | F |
| 0.62500000003100 | 0.13043999673400 | 0.02777666599470 | F | F | F |
| 0.62500000003100 | 0.13043999673400 | 0.36110999932900 | F | F | F |
| 0.62500000003100 | 0.13043999673400 | 0.69444333266100 | F | F | F |
| 0.95833333336500 | 0.13043999673400 | 0.02777666599470 | F | F | F |
| 0.95833333336500 | 0.13043999673400 | 0.36110999932900 | F | F | F |
| 0.95833333336500 | 0.13043999673400 | 0.69444333266100 | F | F | F |
| 0.29166666669900 | 0.13043999673400 | 0.24999999994900 | F | F | F |
| 0.29166666669900 | 0.13043999673400 | 0.58333333328300 | F | F | F |

|                  |                  |                  |   |   |   |
|------------------|------------------|------------------|---|---|---|
| 0.29166666669900 | 0.13043999673400 | 0.91666666661700 | F | F | F |
| 0.62500000003100 | 0.13043999673400 | 0.24999999994900 | F | F | F |
| 0.62500000003100 | 0.13043999673400 | 0.58333333328300 | F | F | F |
| 0.62500000003100 | 0.13043999673400 | 0.91666666661700 | F | F | F |
| 0.95833333336500 | 0.13043999673400 | 0.24999999994900 | F | F | F |
| 0.95833333336500 | 0.13043999673400 | 0.58333333328300 | F | F | F |
| 0.95833333336500 | 0.13043999673400 | 0.91666666661700 | F | F | F |
| 0.29166666669900 | 0.13043999673400 | 0.13888999819000 | F | F | F |
| 0.29166666669900 | 0.13043999673400 | 0.47222333152400 | F | F | F |
| 0.29166666669900 | 0.13043999673400 | 0.80555666485600 | F | F | F |
| 0.62500000003100 | 0.13043999673400 | 0.13888999819000 | F | F | F |
| 0.62500000003100 | 0.13043999673400 | 0.47222333152400 | F | F | F |
| 0.62500000003100 | 0.13043999673400 | 0.80555666485600 | F | F | F |
| 0.95833333336500 | 0.13043999673400 | 0.13888999819000 | F | F | F |
| 0.95833333336500 | 0.13043999673400 | 0.47222333152400 | F | F | F |
| 0.95833333336500 | 0.13043999673400 | 0.80555666485600 | F | F | F |
| 0.12438550885900 | 0.26569801429100 | 0.03115436802010 | T | T | T |
| 0.12498664956400 | 0.26515255705700 | 0.36426085379800 | T | T | T |
| 0.12492285636100 | 0.26543291936400 | 0.69882425815600 | T | T | T |
| 0.45819203745600 | 0.26536388445100 | 0.03220052408090 | T | T | T |
| 0.45810685893400 | 0.26540098242400 | 0.36548470247100 | T | T | T |
| 0.45823335747300 | 0.26545098681100 | 0.69880447924900 | T | T | T |
| 0.79153947101600 | 0.26540480140700 | 0.03220686183030 | T | T | T |
| 0.79157806627100 | 0.26539066886300 | 0.36551060366100 | T | T | T |
| 0.79158896258600 | 0.26544845483300 | 0.69878068007600 | T | T | T |
| 0.12452181071000 | 0.26386520207300 | 0.25166401822000 | T | T | T |
| 0.12433643703400 | 0.26298226343100 | 0.58469461440900 | T | T | T |
| 0.12451809274200 | 0.26377356357300 | 0.91794871180300 | T | T | T |
| 0.45776559782000 | 0.26329862657100 | 0.25150787126300 | T | T | T |
| 0.45765368676500 | 0.26299483645300 | 0.58467679774000 | T | T | T |

|                  |                  |                  |   |   |   |
|------------------|------------------|------------------|---|---|---|
| 0.45779863302200 | 0.26333582497100 | 0.91816943297600 | T | T | T |
| 0.79116276870300 | 0.26330871709000 | 0.25154759543500 | T | T | T |
| 0.79100807033900 | 0.26300311038100 | 0.58466386701400 | T | T | T |
| 0.79115788206500 | 0.26334931181100 | 0.91818204657900 | T | T | T |
| 0.12604049002700 | 0.26541091463200 | 0.14189059243400 | T | T | T |
| 0.12568815828300 | 0.26685538187100 | 0.47500333510600 | T | T | T |
| 0.12604041078300 | 0.26617326094300 | 0.80881973444300 | T | T | T |
| 0.45903201611300 | 0.26624069611200 | 0.14223845788000 | T | T | T |
| 0.45934252368500 | 0.26622284959200 | 0.47548961373500 | T | T | T |
| 0.45898366667400 | 0.26692546235500 | 0.80826433394800 | T | T | T |
| 0.79270613255400 | 0.26622845514100 | 0.14226860843600 | T | T | T |
| 0.79271245656500 | 0.26625661314200 | 0.47550975393600 | T | T | T |
| 0.79239155148300 | 0.26683010827700 | 0.80831759202600 | T | T | T |
| 0.29147616491400 | 0.26554684141800 | 0.03083531221460 | T | T | T |
| 0.29091227542000 | 0.26547293783500 | 0.36453901120600 | T | T | T |
| 0.29151490335700 | 0.26538744027700 | 0.69764403571600 | T | T | T |
| 0.62483380266400 | 0.26541865687900 | 0.03098909187160 | T | T | T |
| 0.62483979136900 | 0.26537924038500 | 0.36429049717400 | T | T | T |
| 0.62479277969000 | 0.26546533088300 | 0.69761552807600 | T | T | T |
| 0.95760497590300 | 0.26567750942200 | 0.03123935183390 | T | T | T |
| 0.95824908755700 | 0.26535318365700 | 0.36421482101900 | T | T | T |
| 0.95820896743200 | 0.26544466788400 | 0.69759937547500 | T | T | T |
| 0.29078531000800 | 0.26403174087800 | 0.25073759086800 | T | T | T |
| 0.29143678904100 | 0.26476366820300 | 0.58434071078700 | T | T | T |
| 0.29143182150500 | 0.26469723723800 | 0.91774948582400 | T | T | T |
| 0.62477772339300 | 0.26476810130100 | 0.25106144006200 | T | T | T |
| 0.62477868552100 | 0.26479250219000 | 0.58431722209000 | T | T | T |
| 0.62476503131600 | 0.26471351467700 | 0.91768569936000 | T | T | T |
| 0.95807985702100 | 0.26476740152000 | 0.25105372378200 | T | T | T |
| 0.95812046547200 | 0.26475111541800 | 0.58430833784800 | T | T | T |

|                  |                  |                  |   |   |   |
|------------------|------------------|------------------|---|---|---|
| 0.95807553257300 | 0.26472054174500 | 0.91771286811900 | T | T | T |
| 0.29135723972000 | 0.26504568772000 | 0.14147052787400 | T | T | T |
| 0.29283304524000 | 0.26550476724000 | 0.47479412953600 | T | T | T |
| 0.29285284067600 | 0.26539098426100 | 0.80818134342800 | T | T | T |
| 0.62619940321200 | 0.26550016744500 | 0.14152778466000 | T | T | T |
| 0.62618063251900 | 0.26550998755800 | 0.47477194243300 | T | T | T |
| 0.62618973537900 | 0.26545161292500 | 0.80812475719900 | T | T | T |
| 0.95983562485700 | 0.26553892211100 | 0.14161646753200 | T | T | T |
| 0.95950999567000 | 0.26546886262500 | 0.47473965585900 | T | T | T |
| 0.95951872008400 | 0.26550351187700 | 0.80814661114400 | T | T | T |
| 0.04129281063500 | 0.99490942882200 | 0.03139010444790 | T | T | T |
| 0.04233372211680 | 0.99504162280600 | 0.36448447753300 | T | T | T |
| 0.04197524518900 | 0.99477726414300 | 0.69832107003400 | T | T | T |
| 0.37522049561300 | 0.99483110523800 | 0.03166663681120 | T | T | T |
| 0.37470671731400 | 0.99517687748100 | 0.36471520678700 | T | T | T |
| 0.37524557050000 | 0.99485894523800 | 0.69832841319400 | T | T | T |
| 0.70858433064900 | 0.99480071971000 | 0.03169204574340 | T | T | T |
| 0.70800367340000 | 0.99516247697600 | 0.36467416226000 | T | T | T |
| 0.70857069207200 | 0.99482160106500 | 0.69828187288600 | T | T | T |
| 0.04103016428040 | 0.99736887014200 | 0.25099777436000 | T | T | T |
| 0.04116650971450 | 0.99710950005400 | 0.58433815567700 | T | T | T |
| 0.04118461554490 | 0.99722896048300 | 0.91775255236700 | T | T | T |
| 0.37438599253300 | 0.99736365073800 | 0.25100830231100 | T | T | T |
| 0.37448241499300 | 0.99714150054900 | 0.58433925152900 | T | T | T |
| 0.37448748006800 | 0.99718701832000 | 0.91769289321200 | T | T | T |
| 0.70783098968200 | 0.99724257461100 | 0.25105220954200 | T | T | T |
| 0.70782941944200 | 0.99711731901100 | 0.58432441643300 | T | T | T |
| 0.70783372630200 | 0.99718329439600 | 0.91769470023200 | T | T | T |
| 0.04162226551080 | 0.99529697935400 | 0.14196399753200 | T | T | T |
| 0.04077246875870 | 0.99517626794100 | 0.47548262968400 | T | T | T |



|                  |                  |                  |   |   |   |
|------------------|------------------|------------------|---|---|---|
| 0.04074574138560 | 0.99512208146000 | 0.80889244739400 | T | T | T |
| 0.37313298700700 | 0.99552503611200 | 0.14199757504700 | T | T | T |
| 0.37404689560400 | 0.99512198640500 | 0.47552931182400 | T | T | T |
| 0.37404709670700 | 0.99516759048000 | 0.80890833675100 | T | T | T |
| 0.70740610667300 | 0.99513619330600 | 0.14227787827800 | T | T | T |
| 0.70740781765600 | 0.99513073672100 | 0.47551182535000 | T | T | T |
| 0.70740093685300 | 0.99513972729000 | 0.80888969073400 | T | T | T |
| 0.20839196273500 | 0.99509742158200 | 0.03090439990490 | T | T | T |
| 0.20790075083900 | 0.99551936291600 | 0.36374025348600 | T | T | T |
| 0.20841325722900 | 0.99514926550100 | 0.69765583227400 | T | T | T |
| 0.54167181603000 | 0.99516400077800 | 0.03100465783670 | T | T | T |
| 0.54147494026400 | 0.99513139285500 | 0.36428233021600 | T | T | T |
| 0.54171280236800 | 0.99510836282100 | 0.69762370002200 | T | T | T |
| 0.87492826619100 | 0.99513089245900 | 0.03100809211550 | T | T | T |
| 0.87501075016100 | 0.99517489436100 | 0.36430452963100 | T | T | T |
| 0.87508191576800 | 0.99510699830800 | 0.69764873917700 | T | T | T |
| 0.20699945135700 | 0.99629700479200 | 0.25140935951600 | T | T | T |
| 0.20709527940500 | 0.99681186962400 | 0.58430232634000 | T | T | T |
| 0.20712618397700 | 0.99707679395200 | 0.91767466023200 | T | T | T |
| 0.54040155953500 | 0.99683497352200 | 0.25095848401400 | T | T | T |
| 0.54040171145200 | 0.99681643454500 | 0.58428930307000 | T | T | T |
| 0.54042708751100 | 0.99693154439100 | 0.91761998890200 | T | T | T |
| 0.87376000896500 | 0.99693471671600 | 0.25101587706800 | T | T | T |
| 0.87376434611000 | 0.99683479772600 | 0.58428578618000 | T | T | T |
| 0.87378398855200 | 0.99691759380400 | 0.91763103279900 | T | T | T |
| 0.20853935674600 | 0.99501290530400 | 0.14158622442600 | T | T | T |
| 0.20723005613800 | 0.00290073364305 | 0.47020036481600 | T | T | T |
| 0.20729225524400 | 0.00303016779476 | 0.80364178937100 | T | T | T |
| 0.54058948669300 | 0.00299947416580 | 0.13704160430900 | T | T | T |
| 0.54056790568200 | 0.00298262695717 | 0.47026409742400 | T | T | T |

|                  |                  |                  |   |   |   |
|------------------|------------------|------------------|---|---|---|
| 0.54059171242600 | 0.00302052953776 | 0.80364600510600 | T | T | T |
| 0.87407529048700 | 0.00301830634803 | 0.13711680660400 | T | T | T |
| 0.87390352032700 | 0.00296668759102 | 0.47025690610500 | T | T | T |
| 0.87393291098600 | 0.00304478298291 | 0.80364197991600 | T | T | T |
| 0.00006399598661 | 0.06696365768440 | 0.08266672911650 | T | T | T |
| 0.00058546425316 | 0.06689221354550 | 0.41573267838800 | T | T | T |
| 0.00057660738372 | 0.06695019773830 | 0.74911942427100 | T | T | T |
| 0.33365106312600 | 0.06688847538080 | 0.08243681566700 | T | T | T |
| 0.33385525300000 | 0.06696219377140 | 0.41579424884400 | T | T | T |
| 0.33388460431900 | 0.06693092525020 | 0.74914626907100 | T | T | T |
| 0.66722527330200 | 0.06694316389560 | 0.08246922521960 | T | T | T |
| 0.66717466224200 | 0.06695996987380 | 0.41577547662800 | T | T | T |
| 0.66721003961900 | 0.06693297033090 | 0.74913451291900 | T | T | T |
| 0.33301655824900 | 0.06554558130430 | 0.30540626703000 | T | T | T |
| 0.33318751007700 | 0.06562654043930 | 0.63878227256700 | T | T | T |
| 0.33314844845300 | 0.06564801511490 | 0.97209783393300 | T | T | T |
| 0.66627870185400 | 0.06561231882770 | 0.30545435266000 | T | T | T |
| 0.66649918741100 | 0.06563074798040 | 0.63876893123000 | T | T | T |
| 0.66653388748900 | 0.06562100878630 | 0.97214204512400 | T | T | T |
| 0.99983918349000 | 0.06567747157510 | 0.30545612989000 | T | T | T |
| 0.99988415213300 | 0.06562801446730 | 0.63877886281300 | T | T | T |
| 0.99969149078700 | 0.06562140155010 | 0.97212049334500 | T | T | T |
| 0.33317034749200 | 0.06830308842140 | 0.19337473174200 | T | T | T |
| 0.33322421041100 | 0.06805573465460 | 0.52669512398200 | T | T | T |
| 0.33322519042600 | 0.06801935905640 | 0.86006385451600 | T | T | T |
| 0.66656178365800 | 0.06804788455200 | 0.19339449428600 | T | T | T |
| 0.66656741322800 | 0.06804475661070 | 0.52669059363600 | T | T | T |
| 0.66656528384600 | 0.06802253958420 | 0.86005297259900 | T | T | T |
| 0.99990174576800 | 0.06803361066500 | 0.19333171847500 | T | T | T |
| 0.99990940136100 | 0.06805455206650 | 0.52669067656500 | T | T | T |

|                  |                  |                  |   |   |   |
|------------------|------------------|------------------|---|---|---|
| 0.99991553382000 | 0.06800600656980 | 0.86005827643000 | T | T | T |
| 0.16670572011700 | 0.06683718550310 | 0.08265951281970 | T | T | T |
| 0.16695578961100 | 0.06311762735570 | 0.41888341537000 | T | T | T |
| 0.16724281191300 | 0.06313751788990 | 0.75253498463500 | T | T | T |
| 0.50054450395200 | 0.06315494895430 | 0.08588814148640 | T | T | T |
| 0.50052024782600 | 0.06314126430830 | 0.41919916879400 | T | T | T |
| 0.50057490713500 | 0.06313553922670 | 0.75253045213400 | T | T | T |
| 0.83387411938000 | 0.06315067369680 | 0.08589097915620 | T | T | T |
| 0.83391173538900 | 0.06313118183910 | 0.41920868750600 | T | T | T |
| 0.83394445842000 | 0.06311659062990 | 0.75254965186100 | T | T | T |
| 0.16646763423500 | 0.06624318857240 | 0.30470225442500 | T | T | T |
| 0.16650462678900 | 0.06559697724660 | 0.63897801349900 | T | T | T |
| 0.16650381627900 | 0.06566677932700 | 0.97236350755900 | T | T | T |
| 0.49980462723900 | 0.06559441987830 | 0.30562609194400 | T | T | T |
| 0.49983142432300 | 0.06559939243690 | 0.63897995035300 | T | T | T |
| 0.49980166234100 | 0.06558793375760 | 0.97230374209900 | T | T | T |
| 0.83313886726500 | 0.06557741258050 | 0.30566522632600 | T | T | T |
| 0.83317816685500 | 0.06558675023460 | 0.63897721398500 | T | T | T |
| 0.83315249735200 | 0.06558772222670 | 0.97231611316100 | T | T | T |
| 0.16662765635500 | 0.06761532576250 | 0.19372386867000 | T | T | T |
| 0.16623267549500 | 0.06868343901960 | 0.52596603871400 | T | T | T |
| 0.16622633562800 | 0.06867657690950 | 0.85930750681600 | T | T | T |
| 0.49954620177100 | 0.06867709028980 | 0.19263654235200 | T | T | T |
| 0.49954717000700 | 0.06868146260040 | 0.52596228360700 | T | T | T |
| 0.49952697238900 | 0.06869312691610 | 0.85930861542600 | T | T | T |
| 0.83291141284600 | 0.06873269012980 | 0.19266091468300 | T | T | T |
| 0.83289073547200 | 0.06868514694660 | 0.52596630969100 | T | T | T |
| 0.83288944969700 | 0.06869541377980 | 0.85930579506900 | T | T | T |
| 0.08322258654440 | 0.06605545018370 | 0.08334376385410 | T | T | T |
| 0.08420622833300 | 0.06508277337470 | 0.41713651312000 | T | T | T |

|                  |                  |                  |   |   |   |
|------------------|------------------|------------------|---|---|---|
| 0.08403695058490 | 0.06512887478090 | 0.75071768714100 | T | T | T |
| 0.41724310477000 | 0.06508521718120 | 0.08409701352020 | T | T | T |
| 0.41727091633100 | 0.06513420083240 | 0.41734847101000 | T | T | T |
| 0.41733373828900 | 0.06513536235140 | 0.75069666474100 | T | T | T |
| 0.75069053121800 | 0.06512204237050 | 0.08406498863710 | T | T | T |
| 0.75062072644700 | 0.06512516635350 | 0.41735273079700 | T | T | T |
| 0.75067129759700 | 0.06513157552950 | 0.75070327026300 | T | T | T |
| 0.08344080073520 | 0.06627145825390 | 0.30469014677300 | T | T | T |
| 0.08327197635510 | 0.06554936983600 | 0.63866895720800 | T | T | T |
| 0.08326700427680 | 0.06562687390650 | 0.97202722682000 | T | T | T |
| 0.41660994560200 | 0.06555909957410 | 0.30537452208200 | T | T | T |
| 0.41658569155000 | 0.06554947497720 | 0.63867316514600 | T | T | T |
| 0.41655858225700 | 0.06554095481200 | 0.97202174030900 | T | T | T |
| 0.74989072666800 | 0.06555484515260 | 0.30536357755400 | T | T | T |
| 0.74991985750500 | 0.06554430390940 | 0.63865959161300 | T | T | T |
| 0.74992102776000 | 0.06553339680600 | 0.97203139848300 | T | T | T |
| 0.08322836960520 | 0.06777252807370 | 0.19280388087900 | T | T | T |
| 0.08357077241100 | 0.06819833107910 | 0.52608899245300 | T | T | T |
| 0.08357769305840 | 0.06819250527760 | 0.85944378700000 | T | T | T |
| 0.41687439409200 | 0.06824027694250 | 0.19271816684000 | T | T | T |
| 0.41688067206400 | 0.06818289880340 | 0.52606885491000 | T | T | T |
| 0.41687706940700 | 0.06824641140990 | 0.85943214275500 | T | T | T |
| 0.75023662508400 | 0.06825125083850 | 0.19276855326300 | T | T | T |
| 0.75022977083500 | 0.06818558604720 | 0.52606662026700 | T | T | T |
| 0.75023367991100 | 0.06824609593500 | 0.85942692010800 | T | T | T |
| 0.25021872723900 | 0.06670685224760 | 0.08256553083170 | T | T | T |
| 0.24979976756700 | 0.06682080832380 | 0.41572563100100 | T | T | T |
| 0.24990998820800 | 0.06682847438890 | 0.74908104591300 | T | T | T |
| 0.58323690373600 | 0.06684112950660 | 0.08241682897780 | T | T | T |
| 0.58316562649800 | 0.06686909585710 | 0.41575227156300 | T | T | T |

|                  |                  |                  |   |   |   |
|------------------|------------------|------------------|---|---|---|
| 0.58323124929600 | 0.06683605146290 | 0.74907509342500 | T | T | T |
| 0.91648157335000 | 0.06680789721110 | 0.08249258314100 | T | T | T |
| 0.91657260264800 | 0.06684356928510 | 0.41572834787400 | T | T | T |
| 0.91660050673500 | 0.06683613376880 | 0.74906284233600 | T | T | T |
| 0.25003380341700 | 0.06609042521360 | 0.30448553557800 | T | T | T |
| 0.25028615842900 | 0.06591473235990 | 0.63793713643400 | T | T | T |
| 0.25022938468300 | 0.06598533558830 | 0.97125985073700 | T | T | T |
| 0.58357746413900 | 0.06590262775070 | 0.30459020905500 | T | T | T |
| 0.58362184882500 | 0.06591051119890 | 0.63791815694000 | T | T | T |
| 0.58358652707400 | 0.06588786812610 | 0.97129623770300 | T | T | T |
| 0.91691443707700 | 0.06592634545400 | 0.30463067231900 | T | T | T |
| 0.91696263021500 | 0.06590233839590 | 0.63793473178600 | T | T | T |
| 0.91694553452200 | 0.06590624820560 | 0.97126785055500 | T | T | T |
| 0.24980197694500 | 0.06699152924520 | 0.19322071345100 | T | T | T |
| 0.25016783412700 | 0.06730934520080 | 0.52675254425900 | T | T | T |
| 0.25014330959100 | 0.06721669789380 | 0.86015493321000 | T | T | T |
| 0.58349405455100 | 0.06731164478380 | 0.19345474556700 | T | T | T |
| 0.58350322239800 | 0.06732965631020 | 0.52674965734400 | T | T | T |
| 0.58347343953000 | 0.06726786877400 | 0.86012000044900 | T | T | T |
| 0.91687747965300 | 0.06728419590100 | 0.19347405270700 | T | T | T |
| 0.91683389023500 | 0.06732413262650 | 0.52675305402900 | T | T | T |
| 0.91683829963800 | 0.06724248197140 | 0.86013087486700 | T | T | T |
| 0.04166666667330 | 0.13043999673400 | 0.02777666599470 | F | F | F |
| 0.04166666667330 | 0.13043999673400 | 0.36110999932900 | F | F | F |
| 0.04166666667330 | 0.13043999673400 | 0.69444333266100 | F | F | F |
| 0.37500000000700 | 0.13043999673400 | 0.02777666599470 | F | F | F |
| 0.37500000000700 | 0.13043999673400 | 0.36110999932900 | F | F | F |
| 0.37500000000700 | 0.13043999673400 | 0.69444333266100 | F | F | F |
| 0.70833333334100 | 0.13043999673400 | 0.02777666599470 | F | F | F |
| 0.70833333334100 | 0.13043999673400 | 0.36110999932900 | F | F | F |

|                  |                  |                  |   |   |   |
|------------------|------------------|------------------|---|---|---|
| 0.70833333334100 | 0.13043999673400 | 0.69444333266100 | F | F | F |
| 0.04166666667330 | 0.13043999673400 | 0.24999999994900 | F | F | F |
| 0.04166666667330 | 0.13043999673400 | 0.58333333328300 | F | F | F |
| 0.04166666667330 | 0.13043999673400 | 0.91666666661700 | F | F | F |
| 0.3750000000700  | 0.13043999673400 | 0.24999999994900 | F | F | F |
| 0.3750000000700  | 0.13043999673400 | 0.58333333328300 | F | F | F |
| 0.3750000000700  | 0.13043999673400 | 0.91666666661700 | F | F | F |
| 0.70833333334100 | 0.13043999673400 | 0.24999999994900 | F | F | F |
| 0.70833333334100 | 0.13043999673400 | 0.58333333328300 | F | F | F |
| 0.70833333334100 | 0.13043999673400 | 0.91666666661700 | F | F | F |
| 0.04166666667330 | 0.13043999673400 | 0.13888999819000 | F | F | F |
| 0.04166666667330 | 0.13043999673400 | 0.47222333152400 | F | F | F |
| 0.04166666667330 | 0.13043999673400 | 0.80555666485600 | F | F | F |
| 0.3750000000700  | 0.13043999673400 | 0.13888999819000 | F | F | F |
| 0.3750000000700  | 0.13043999673400 | 0.47222333152400 | F | F | F |
| 0.3750000000700  | 0.13043999673400 | 0.80555666485600 | F | F | F |
| 0.70833333334100 | 0.13043999673400 | 0.13888999819000 | F | F | F |
| 0.70833333334100 | 0.13043999673400 | 0.47222333152400 | F | F | F |
| 0.70833333334100 | 0.13043999673400 | 0.80555666485600 | F | F | F |
| 0.2083333332800  | 0.13043999673400 | 0.02777666599470 | F | F | F |
| 0.2083333332800  | 0.13043999673400 | 0.36110999932900 | F | F | F |
| 0.2083333332800  | 0.13043999673400 | 0.69444333266100 | F | F | F |
| 0.5416666666100  | 0.13043999673400 | 0.02777666599470 | F | F | F |
| 0.5416666666100  | 0.13043999673400 | 0.36110999932900 | F | F | F |
| 0.5416666666100  | 0.13043999673400 | 0.69444333266100 | F | F | F |
| 0.8749999999500  | 0.13043999673400 | 0.02777666599470 | F | F | F |
| 0.8749999999500  | 0.13043999673400 | 0.36110999932900 | F | F | F |
| 0.8749999999500  | 0.13043999673400 | 0.69444333266100 | F | F | F |
| 0.2083333332800  | 0.13043999673400 | 0.24999999994900 | F | F | F |
| 0.2083333332800  | 0.13043999673400 | 0.58333333328300 | F | F | F |

|                  |                  |                  |   |   |   |
|------------------|------------------|------------------|---|---|---|
| 0.2083333332800  | 0.13043999673400 | 0.91666666661700 | F | F | F |
| 0.5416666666100  | 0.13043999673400 | 0.24999999994900 | F | F | F |
| 0.5416666666100  | 0.13043999673400 | 0.58333333328300 | F | F | F |
| 0.5416666666100  | 0.13043999673400 | 0.91666666661700 | F | F | F |
| 0.8749999999500  | 0.13043999673400 | 0.24999999994900 | F | F | F |
| 0.8749999999500  | 0.13043999673400 | 0.58333333328300 | F | F | F |
| 0.8749999999500  | 0.13043999673400 | 0.91666666661700 | F | F | F |
| 0.2083333332800  | 0.13043999673400 | 0.13888999819000 | F | F | F |
| 0.2083333332800  | 0.13043999673400 | 0.47222333152400 | F | F | F |
| 0.2083333332800  | 0.13043999673400 | 0.80555666485600 | F | F | F |
| 0.5416666666100  | 0.13043999673400 | 0.13888999819000 | F | F | F |
| 0.5416666666100  | 0.13043999673400 | 0.47222333152400 | F | F | F |
| 0.5416666666100  | 0.13043999673400 | 0.80555666485600 | F | F | F |
| 0.8749999999500  | 0.13043999673400 | 0.13888999819000 | F | F | F |
| 0.8749999999500  | 0.13043999673400 | 0.47222333152400 | F | F | F |
| 0.8749999999500  | 0.13043999673400 | 0.80555666485600 | F | F | F |
| 0.00011230021048 | 0.19394633439900 | 0.08257311595380 | T | T | T |
| 0.00059288782620 | 0.19389046920900 | 0.41569870234700 | T | T | T |
| 0.00059581595963 | 0.19388845782100 | 0.74910062040800 | T | T | T |
| 0.33368657970700 | 0.19394405663300 | 0.08243817399030 | T | T | T |
| 0.33390375674200 | 0.19386819273200 | 0.41577079986600 | T | T | T |
| 0.33388350290300 | 0.19386481133300 | 0.74911179645900 | T | T | T |
| 0.66724498522900 | 0.19388783431400 | 0.08245163871010 | T | T | T |
| 0.66724748568000 | 0.19387004171800 | 0.41576060180200 | T | T | T |
| 0.66721425438100 | 0.19386659784200 | 0.74909067353200 | T | T | T |
| 0.33302720971200 | 0.19527569556500 | 0.30532321048500 | T | T | T |
| 0.33314750008200 | 0.19526600961400 | 0.63866489111500 | T | T | T |
| 0.33313746724300 | 0.19523914898700 | 0.97197077307100 | T | T | T |
| 0.66648270701700 | 0.19528811133500 | 0.30532759632400 | T | T | T |
| 0.66646206354900 | 0.19525843756600 | 0.63866085382700 | T | T | T |

|                  |                  |                  |   |   |   |
|------------------|------------------|------------------|---|---|---|
| 0.66649731596000 | 0.19528346041000 | 0.97199909363600 | T | T | T |
| 0.99981864474800 | 0.19520695874600 | 0.30526657289900 | T | T | T |
| 0.99983629632600 | 0.19525876636600 | 0.63867058095900 | T | T | T |
| 0.99967875581600 | 0.19522358896400 | 0.97193271666800 | T | T | T |
| 0.33316945319500 | 0.19276490427600 | 0.19342602815900 | T | T | T |
| 0.33320261740800 | 0.19275973353500 | 0.52671278225300 | T | T | T |
| 0.33328152720000 | 0.19286023230100 | 0.86004579401800 | T | T | T |
| 0.66657625672200 | 0.19279785118200 | 0.19341363713300 | T | T | T |
| 0.66654623217900 | 0.19277195144600 | 0.52670462198100 | T | T | T |
| 0.66661964049000 | 0.19284482077100 | 0.86003370676800 | T | T | T |
| 0.99993658410400 | 0.19289524611600 | 0.19334561138800 | T | T | T |
| 0.99992492350400 | 0.19279662438500 | 0.52666819195000 | T | T | T |
| 0.99993314799200 | 0.19282375114900 | 0.86007391643600 | T | T | T |
| 0.16665116374500 | 0.19406254582700 | 0.08258224573960 | T | T | T |
| 0.16705317848300 | 0.19850028449100 | 0.41918951125100 | T | T | T |
| 0.16730030412300 | 0.19851382059100 | 0.75284657407200 | T | T | T |
| 0.50057550476800 | 0.19848029292100 | 0.08617226408440 | T | T | T |
| 0.50060124486700 | 0.19849944710200 | 0.41948211188300 | T | T | T |
| 0.50061777691400 | 0.19852049929900 | 0.75284366977300 | T | T | T |
| 0.83394068849000 | 0.19849839303100 | 0.08620352820130 | T | T | T |
| 0.83395476199800 | 0.19850639046500 | 0.41950107823700 | T | T | T |
| 0.83397002383700 | 0.19851694914300 | 0.75282810037900 | T | T | T |
| 0.16648101306600 | 0.19456384317600 | 0.30460440871100 | T | T | T |
| 0.16659455660900 | 0.19530776337800 | 0.63881256089700 | T | T | T |
| 0.16656032372700 | 0.19511721007300 | 0.97170089456100 | T | T | T |
| 0.49990860410900 | 0.19533596103200 | 0.30543178671500 | T | T | T |
| 0.49992251792800 | 0.19530875376900 | 0.63880485141800 | T | T | T |
| 0.49985969790000 | 0.19533590430600 | 0.97211652431200 | T | T | T |
| 0.83321966459700 | 0.19533886491900 | 0.30548541769400 | T | T | T |
| 0.83325270286700 | 0.19531366383900 | 0.63881375260600 | T | T | T |



|                  |                  |                  |   |   |   |
|------------------|------------------|------------------|---|---|---|
| 0.83321103725100 | 0.19533300342300 | 0.97212274312400 | T | T | T |
| 0.16660123304900 | 0.19326644530900 | 0.19375008085400 | T | T | T |
| 0.16621387342400 | 0.19317864222900 | 0.52627506348200 | T | T | T |
| 0.16627509379000 | 0.19305452076200 | 0.85970588225000 | T | T | T |
| 0.49959935799600 | 0.19306458188700 | 0.19303051210000 | T | T | T |
| 0.49960573770800 | 0.19303831852000 | 0.52634343551200 | T | T | T |
| 0.49949323953500 | 0.19324639431500 | 0.85961441201100 | T | T | T |
| 0.83294129067100 | 0.19306781178900 | 0.19305240887000 | T | T | T |
| 0.83294852252000 | 0.19303753070100 | 0.52634818156200 | T | T | T |
| 0.83286531359200 | 0.19323919724700 | 0.85963117459100 | T | T | T |
| 0.08321071088710 | 0.19478103522900 | 0.08326332117610 | T | T | T |
| 0.08426054759020 | 0.19576769797400 | 0.41719984525900 | T | T | T |
| 0.08401401763780 | 0.19616762536100 | 0.75115899201300 | T | T | T |
| 0.41725243759300 | 0.19623446801700 | 0.08455647973200 | T | T | T |
| 0.41729368745000 | 0.19618398619300 | 0.41781061913800 | T | T | T |
| 0.41736574130700 | 0.19569278405900 | 0.75072670369900 | T | T | T |
| 0.75066373712000 | 0.19619600951500 | 0.08453866983270 | T | T | T |
| 0.75067216956600 | 0.19617422107900 | 0.41783323323300 | T | T | T |
| 0.75070803565800 | 0.19573150873300 | 0.75075378732600 | T | T | T |
| 0.08342961666810 | 0.19458249069400 | 0.30463752624900 | T | T | T |
| 0.08328159069690 | 0.19524680447100 | 0.63860173366700 | T | T | T |
| 0.08346264826170 | 0.19467993802300 | 0.97123144912900 | T | T | T |
| 0.41662123246100 | 0.19526887690900 | 0.30526453037800 | T | T | T |
| 0.41659714718500 | 0.19525507264000 | 0.63859780001600 | T | T | T |
| 0.41657360883500 | 0.19529403268500 | 0.97192184852200 | T | T | T |
| 0.74993154472200 | 0.19528962002600 | 0.30527643238400 | T | T | T |
| 0.74992783434300 | 0.19525071341000 | 0.63858618256400 | T | T | T |
| 0.74993295981500 | 0.19529789832800 | 0.97193395605300 | T | T | T |
| 0.08322303858680 | 0.19385387857600 | 0.19316720298900 | T | T | T |
| 0.08366609809810 | 0.19293552304400 | 0.52607485926900 | T | T | T |

|                  |                  |                  |   |   |   |
|------------------|------------------|------------------|---|---|---|
| 0.08364432440030 | 0.19351946364900 | 0.85985924992600 | T | T | T |
| 0.41692239459100 | 0.19354722412200 | 0.19313727451100 | T | T | T |
| 0.41693846307500 | 0.19279539940300 | 0.52609860714700 | T | T | T |
| 0.41698935657600 | 0.19367227101500 | 0.85978410283800 | T | T | T |
| 0.75028552493100 | 0.19354404801600 | 0.19316891742300 | T | T | T |
| 0.75028613255600 | 0.19279720168100 | 0.52609098181900 | T | T | T |
| 0.75033721585400 | 0.19366998305900 | 0.85978861192700 | T | T | T |
| 0.25018694498900 | 0.19409676953500 | 0.08252879109520 | T | T | T |
| 0.24979227006100 | 0.19399867270900 | 0.41571579055300 | T | T | T |
| 0.24986438355200 | 0.19400407092600 | 0.74906898555600 | T | T | T |
| 0.58319016565200 | 0.19398459809100 | 0.08240500157650 | T | T | T |
| 0.58319027255200 | 0.19398452092100 | 0.41571555330700 | T | T | T |
| 0.58318640624700 | 0.19398849435300 | 0.74905807829000 | T | T | T |
| 0.91643509552300 | 0.19401727209000 | 0.08247404836930 | T | T | T |
| 0.91653139889400 | 0.19397593694600 | 0.41570561143500 | T | T | T |
| 0.91655311819600 | 0.19399439695000 | 0.74905545167300 | T | T | T |
| 0.24997824028000 | 0.19467138474400 | 0.30440011068400 | T | T | T |
| 0.25024847020700 | 0.19490578216200 | 0.63777114694200 | T | T | T |
| 0.25000787091900 | 0.19483485156100 | 0.97092277834300 | T | T | T |
| 0.58354302015900 | 0.19489919795500 | 0.30443619424000 | T | T | T |
| 0.58356730419900 | 0.19489912070900 | 0.63774738877700 | T | T | T |
| 0.58356328950100 | 0.19491710023600 | 0.97112498864000 | T | T | T |
| 0.91691449929600 | 0.19489007327100 | 0.30445629065100 | T | T | T |
| 0.91692742226800 | 0.19490943442100 | 0.63777421491400 | T | T | T |
| 0.91689889343500 | 0.19490361149100 | 0.97110677369400 | T | T | T |
| 0.24976135811700 | 0.19379481962700 | 0.19322114728300 | T | T | T |
| 0.25005762469300 | 0.19388459791900 | 0.52656101246100 | T | T | T |
| 0.25004292160500 | 0.19391899695700 | 0.85999375149000 | T | T | T |
| 0.58339187834000 | 0.19390479154500 | 0.19325654599800 | T | T | T |
| 0.58338924560800 | 0.19389332880400 | 0.52654796199400 | T | T | T |

|                  |                  |                  |   |   |   |
|------------------|------------------|------------------|---|---|---|
| 0.58336170357000 | 0.19392395603000 | 0.85993327582900 | T | T | T |
| 0.91674402743500 | 0.19393554046000 | 0.19328169787900 | T | T | T |
| 0.91672461987400 | 0.19390258199000 | 0.52654831612900 | T | T | T |
| 0.91671756878700 | 0.19395320259400 | 0.85994959217600 | T | T | T |
| 0.04157933665090 | 0.26550845688500 | 0.03082597011390 | T | T | T |
| 0.04233448266700 | 0.26557868741400 | 0.36448467770600 | T | T | T |
| 0.04197964347790 | 0.26587065245400 | 0.69830519654700 | T | T | T |
| 0.37522323551700 | 0.26579191592800 | 0.03166819556050 | T | T | T |
| 0.37475812638200 | 0.26546390071700 | 0.36471398381000 | T | T | T |
| 0.37524774520500 | 0.26580007976200 | 0.69831068785300 | T | T | T |
| 0.70859809590800 | 0.26583024697600 | 0.03168010732800 | T | T | T |
| 0.70860806185000 | 0.26579507732700 | 0.36498497569700 | T | T | T |
| 0.70856712316900 | 0.26582473167000 | 0.69825779542100 | T | T | T |
| 0.04094319612520 | 0.26428786599000 | 0.25113853483500 | T | T | T |
| 0.04115014407200 | 0.26409502144600 | 0.58436209166300 | T | T | T |
| 0.04101192620680 | 0.26450266928400 | 0.91789034941000 | T | T | T |
| 0.37417374751000 | 0.26443606072000 | 0.25121010562700 | T | T | T |
| 0.37447378025700 | 0.26406644588000 | 0.58433144564300 | T | T | T |
| 0.37431916767800 | 0.26449831269400 | 0.91789253961800 | T | T | T |
| 0.70768049018000 | 0.26449632740300 | 0.25122119223600 | T | T | T |
| 0.70782193311600 | 0.26409932538600 | 0.58431585746800 | T | T | T |
| 0.70767245509000 | 0.26450153160100 | 0.91788778048500 | T | T | T |
| 0.04163867320620 | 0.26540350472300 | 0.14197604023700 | T | T | T |
| 0.04075455106090 | 0.26551671606300 | 0.47546514097300 | T | T | T |
| 0.04048528151330 | 0.26577492556200 | 0.80926280006300 | T | T | T |
| 0.37286428309600 | 0.26540680128100 | 0.14234332540200 | T | T | T |
| 0.37377519094800 | 0.26576883795200 | 0.47589737135000 | T | T | T |
| 0.37404538369800 | 0.26552854681100 | 0.80887649310800 | T | T | T |
| 0.70713796684800 | 0.26577195286900 | 0.14265593906500 | T | T | T |
| 0.70714246363700 | 0.26576726038300 | 0.47588220580600 | T | T | T |

|                  |                  |                  |   |   |   |
|------------------|------------------|------------------|---|---|---|
| 0.70739950433900 | 0.26557587388500 | 0.80889041642000 | T | T | T |
| 0.20830624610100 | 0.26543651272300 | 0.03070310100420 | T | T | T |
| 0.20797644753300 | 0.26516732208500 | 0.36373341481800 | T | T | T |
| 0.20842070251400 | 0.26547233358000 | 0.69758400080500 | T | T | T |
| 0.54169022297900 | 0.26545134363300 | 0.03092621365510 | T | T | T |
| 0.54168133883100 | 0.26547335836700 | 0.36422261410000 | T | T | T |
| 0.54172886965900 | 0.26551409031300 | 0.69756652672300 | T | T | T |
| 0.87493839208200 | 0.26548580062900 | 0.03093640349640 | T | T | T |
| 0.87507868962700 | 0.26546353039300 | 0.36424899243000 | T | T | T |
| 0.87510183333800 | 0.26551767082500 | 0.69757956912200 | T | T | T |
| 0.20693340292600 | 0.26494766059900 | 0.25142318077700 | T | T | T |
| 0.20740878993200 | 0.26506708523900 | 0.58419960849800 | T | T | T |
| 0.20744835453500 | 0.26525599168800 | 0.91738279311100 | T | T | T |
| 0.54074922853700 | 0.26506033335400 | 0.25085360719300 | T | T | T |
| 0.54072504760700 | 0.26506580761200 | 0.58417338171800 | T | T | T |
| 0.54077920141100 | 0.26498725124600 | 0.91755891857200 | T | T | T |
| 0.87409304535200 | 0.26495294904300 | 0.25094316432300 | T | T | T |
| 0.87407815365200 | 0.26502557030000 | 0.58419388913500 | T | T | T |
| 0.87411474370000 | 0.26502229380400 | 0.91757797692300 | T | T | T |
| 0.20854425757300 | 0.26571862263200 | 0.14159237892800 | T | T | T |
| 0.20732386089400 | 0.25901392062000 | 0.47016322624200 | T | T | T |
| 0.20744340997400 | 0.25903957801900 | 0.80361489402700 | T | T | T |
| 0.54072555235200 | 0.25911052530000 | 0.13697209275000 | T | T | T |
| 0.54070022600700 | 0.25908015064100 | 0.47023145611700 | T | T | T |
| 0.54072558203300 | 0.25910120193800 | 0.80358163576800 | T | T | T |
| 0.87423208074100 | 0.25917259357200 | 0.13702136039000 | T | T | T |
| 0.87402925084800 | 0.25907309017700 | 0.47022224417900 | T | T | T |
| 0.87406537666900 | 0.25910732301100 | 0.80356300565700 | T | T | T |
| 0.19115193653300 | 0.38091924760600 | 0.22186321479300 | T | T | T |
| 0.19013561742200 | 0.37489894084600 | 0.55716714591900 | T | T | T |

|                  |                  |                  |   |   |   |
|------------------|------------------|------------------|---|---|---|
| 0.19011883221400 | 0.37543133696100 | 0.89054187794100 | T | T | T |
| 0.52350717675000 | 0.37507185860500 | 0.22394226250500 | T | T | T |
| 0.52357335722200 | 0.37493152995600 | 0.55730791822700 | T | T | T |
| 0.52379096438900 | 0.37505740291100 | 0.89076994047100 | T | T | T |
| 0.85716351070700 | 0.37503292727200 | 0.22412197004300 | T | T | T |
| 0.85710716693500 | 0.37487112124900 | 0.55742593626700 | T | T | T |
| 0.85709194550900 | 0.37503977521300 | 0.89071175270100 | T | T | T |
| 0.20866211233800 | 0.37456852791000 | 0.15812925669200 | T | T | T |
| 0.21733012812100 | 0.29093661998500 | 0.48948905862100 | T | T | T |
| 0.21760589011100 | 0.29078868421400 | 0.82297969138700 | T | T | T |
| 0.55083006516700 | 0.29090206822100 | 0.15633669581900 | T | T | T |
| 0.55078846917700 | 0.29092985974800 | 0.48956588774400 | T | T | T |
| 0.55086164338400 | 0.29089886251800 | 0.82292931757400 | T | T | T |
| 0.88432156329800 | 0.29086384743500 | 0.15645364727500 | T | T | T |
| 0.88413179657400 | 0.29091921563700 | 0.48955321991100 | T | T | T |
| 0.88417823935200 | 0.29090011736700 | 0.82292464991400 | T | T | T |
| 0.22583224881800 | 0.34072091724400 | 0.23952818255100 | T | T | T |
| 0.22322349886600 | 0.33592244875900 | 0.57094085943200 | T | T | T |
| 0.22362334699100 | 0.33662875945300 | 0.90395292932100 | T | T | T |
| 0.55663979845900 | 0.33609093083700 | 0.23759551671900 | T | T | T |
| 0.55658836673000 | 0.33587569707700 | 0.57094689490200 | T | T | T |
| 0.55671507226100 | 0.33603858004800 | 0.90449920036700 | T | T | T |
| 0.89002666168400 | 0.33595727713800 | 0.23793024388700 | T | T | T |
| 0.88994359685300 | 0.33585994782000 | 0.57124252329900 | T | T | T |
| 0.89006972083200 | 0.33599809305100 | 0.90434819635300 | T | T | T |
| 0.16475325201500 | 0.37060944951000 | 0.24026239368500 | T | T | T |
| 0.16250751659300 | 0.36190377681200 | 0.57721924687900 | T | T | T |
| 0.16273938465500 | 0.36198233445600 | 0.91080558554700 | T | T | T |
| 0.49594561883600 | 0.36196738653200 | 0.24410894863300 | T | T | T |
| 0.49590789953500 | 0.36189253901400 | 0.57734743173100 | T | T | T |

|                  |                  |                  |   |   |   |
|------------------|------------------|------------------|---|---|---|
| 0.49609280182600 | 0.36195125204700 | 0.91085033838100 | T | T | T |
| 0.82946781372900 | 0.36200186288700 | 0.24417352327000 | T | T | T |
| 0.82932522151500 | 0.36191608246800 | 0.57736680868500 | T | T | T |
| 0.82942944721700 | 0.36194151638700 | 0.91081437926700 | T | T | T |
| 0.16592506915200 | 0.33694908566600 | 0.20695632539500 | T | T | T |
| 0.16264140904000 | 0.35101499893900 | 0.54277427059900 | T | T | T |
| 0.16272381090300 | 0.35116681919900 | 0.87629360836600 | T | T | T |
| 0.49603178865000 | 0.35109835441000 | 0.20963623071500 | T | T | T |
| 0.49611111451600 | 0.35101602751300 | 0.54291466035100 | T | T | T |
| 0.49629825352800 | 0.35132247945500 | 0.87631475816300 | T | T | T |
| 0.82968869316000 | 0.35120640333900 | 0.20971520574000 | T | T | T |
| 0.82964277015800 | 0.35104203546500 | 0.54294481892800 | T | T | T |
| 0.82959303538300 | 0.35127904387500 | 0.87628814106400 | T | T | T |
| 0.17735757526200 | 0.33116242043200 | 0.27373423341300 | T | T | T |
| 0.17612239572900 | 0.32727665838700 | 0.60571363682400 | T | T | T |
| 0.17666203779900 | 0.32708561320700 | 0.93886744796200 | T | T | T |
| 0.50961682698000 | 0.32729519250700 | 0.27245167880300 | T | T | T |
| 0.50944469719100 | 0.32717045672400 | 0.60578012389000 | T | T | T |
| 0.50960244769200 | 0.32733252540700 | 0.93918978398600 | T | T | T |
| 0.84298472795100 | 0.32726743476900 | 0.27252112486400 | T | T | T |
| 0.84271098501300 | 0.32722798604400 | 0.60587674016200 | T | T | T |
| 0.84299085739000 | 0.32726667977900 | 0.93912760109100 | T | T | T |
| 0.14482788634600 | 0.32722196309100 | 0.26956856962200 | T | T | T |
| 0.14330679849400 | 0.32223639109000 | 0.60068578099000 | T | T | T |
| 0.14375865145200 | 0.32236911043600 | 0.93422343472200 | T | T | T |
| 0.47678318846600 | 0.32230972612000 | 0.26746751597200 | T | T | T |
| 0.47663145616800 | 0.32219997070700 | 0.60070193014600 | T | T | T |
| 0.47678911266400 | 0.32229723534100 | 0.93405077392200 | T | T | T |
| 0.81016498511700 | 0.32228931714700 | 0.26742980674900 | T | T | T |
| 0.80992523856200 | 0.32222049366500 | 0.60066083608800 | T | T | T |

|                  |                  |                  |   |   |   |
|------------------|------------------|------------------|---|---|---|
| 0.81016548617100 | 0.32229918908400 | 0.93407337163300 | T | T | T |
| 0.23682823750200 | 0.38858014285100 | 0.24429088320100 | T | T | T |
| 0.23468685595900 | 0.38500212770000 | 0.57146298273700 | T | T | T |
| 0.23480523397100 | 0.38579159348400 | 0.90480484877600 | T | T | T |
| 0.56800033264200 | 0.38518005848200 | 0.23836040851400 | T | T | T |
| 0.56803981179400 | 0.38493550330200 | 0.57168747640800 | T | T | T |
| 0.56806815165800 | 0.38510667066300 | 0.90549709958700 | T | T | T |
| 0.90156695307900 | 0.38495737391800 | 0.23859121133600 | T | T | T |
| 0.90138631948300 | 0.38491438655600 | 0.57204470903000 | T | T | T |
| 0.90142449906400 | 0.38507990636300 | 0.90528166079800 | T | T | T |
| 0.15105744211600 | 0.30271669619800 | 0.18341211541900 | T | T | T |
| 0.14309943501200 | 0.29991187718800 | 0.51106157229600 | T | T | T |
| 0.14346986368600 | 0.29944855617500 | 0.84444317484700 | T | T | T |
| 0.47660416338300 | 0.29937299626100 | 0.17792087265500 | T | T | T |
| 0.47673917539600 | 0.29941539433600 | 0.51119961673200 | T | T | T |
| 0.47668950765200 | 0.30003318443000 | 0.84447067956500 | T | T | T |
| 0.81022341795700 | 0.29941020706600 | 0.17797937713800 | T | T | T |
| 0.81015599630000 | 0.29945804197800 | 0.51124770718000 | T | T | T |
| 0.80997970165400 | 0.30000125503000 | 0.84447713577300 | T | T | T |
| 0.20851543847600 | 0.39940109024800 | 0.15907059623100 | T | T | T |
| 0.17642879706200 | 0.30420552689000 | 0.51198162531600 | T | T | T |
| 0.17680338030600 | 0.30430145553100 | 0.84551119919700 | T | T | T |
| 0.50995227616300 | 0.30407928811400 | 0.17890099377000 | T | T | T |
| 0.51008198000400 | 0.30404892202800 | 0.51224230291800 | T | T | T |
| 0.51001508840400 | 0.30408571138900 | 0.84538957602500 | T | T | T |
| 0.84356796212000 | 0.30401778288800 | 0.17901169856200 | T | T | T |
| 0.84350444165500 | 0.30397897282300 | 0.51224371581500 | T | T | T |
| 0.84329663373900 | 0.30420066322200 | 0.84533790837300 | T | T | T |
| 0.19123099878700 | 0.88088287532500 | 0.22273416918700 | T | T | T |
| 0.19137316722500 | 0.88714820529100 | 0.55588602499100 | T | T | T |

|                  |                  |                  |   |   |   |
|------------------|------------------|------------------|---|---|---|
| 0.19138255156200 | 0.88718618443100 | 0.88935365829400 | T | T | T |
| 0.52466583930100 | 0.88722189677100 | 0.22255374348300 | T | T | T |
| 0.52472970094300 | 0.88717372906800 | 0.55591655454000 | T | T | T |
| 0.52472846755100 | 0.88714967540400 | 0.88931239484300 | T | T | T |
| 0.85811386893200 | 0.88713511548500 | 0.22271347264000 | T | T | T |
| 0.85807927001900 | 0.88714927882500 | 0.55593706817100 | T | T | T |
| 0.85807009993200 | 0.88714936915700 | 0.88932773510000 | T | T | T |
| 0.20837788579300 | 0.89206502860800 | 0.15834631534300 | T | T | T |
| 0.21682150555600 | 0.97065084246900 | 0.48949195984500 | T | T | T |
| 0.21693331124300 | 0.97088880278300 | 0.82297938255600 | T | T | T |
| 0.55022206908000 | 0.97086918814000 | 0.15638962738600 | T | T | T |
| 0.55018537570800 | 0.97075356609200 | 0.48955679884700 | T | T | T |
| 0.55022903675600 | 0.97087795232200 | 0.82298492958500 | T | T | T |
| 0.88366858450300 | 0.97093635536100 | 0.15651463476000 | T | T | T |
| 0.88352463575700 | 0.97074403579100 | 0.48955295255500 | T | T | T |
| 0.88357124300800 | 0.97089370616900 | 0.82297622859900 | T | T | T |
| 0.22515929403600 | 0.92256481902200 | 0.23989891841500 | T | T | T |
| 0.22351098702000 | 0.92772023060000 | 0.57019497785000 | T | T | T |
| 0.22361744401000 | 0.92782386696700 | 0.90364968181000 | T | T | T |
| 0.55683259086800 | 0.92773374066300 | 0.23680522355000 | T | T | T |
| 0.55684242409000 | 0.92780270541700 | 0.57017289253100 | T | T | T |
| 0.55683398312500 | 0.92780498567800 | 0.90358297169700 | T | T | T |
| 0.89019667759400 | 0.92776528439500 | 0.23709738526300 | T | T | T |
| 0.89017373623200 | 0.92777611208200 | 0.57025936292900 | T | T | T |
| 0.89020713154400 | 0.92780048453200 | 0.90358406944200 | T | T | T |
| 0.16493166192800 | 0.89159715095800 | 0.24110332842600 | T | T | T |
| 0.16374246133400 | 0.89954622789800 | 0.57566693507000 | T | T | T |
| 0.16379680010400 | 0.89981275790600 | 0.90914016576500 | T | T | T |
| 0.49700818716600 | 0.89959705484400 | 0.24229851412600 | T | T | T |
| 0.49708929988900 | 0.89961945415100 | 0.57568463281900 | T | T | T |



|                  |                  |                  |   |   |   |
|------------------|------------------|------------------|---|---|---|
| 0.49708639176600 | 0.89969032005100 | 0.90906986325100 | T | T | T |
| 0.83045764683500 | 0.89964851899000 | 0.24246740040800 | T | T | T |
| 0.83042399357300 | 0.89958813468900 | 0.57568726714400 | T | T | T |
| 0.83044191492000 | 0.89972193614700 | 0.90909447530800 | T | T | T |
| 0.16597616031900 | 0.92391730199600 | 0.20741409846900 | T | T | T |
| 0.16373429315700 | 0.91045222611000 | 0.54138498505400 | T | T | T |
| 0.16371695548300 | 0.91038577468600 | 0.87481818493300 | T | T | T |
| 0.49698156936700 | 0.91044430999200 | 0.20802666361500 | T | T | T |
| 0.49710009921000 | 0.91043873304300 | 0.54137740724300 | T | T | T |
| 0.49710392108000 | 0.91041339600500 | 0.87475666224400 | T | T | T |
| 0.83051310424400 | 0.91046792800100 | 0.20820842759400 | T | T | T |
| 0.83046808766100 | 0.91043689016000 | 0.54138693404600 | T | T | T |
| 0.83045037164300 | 0.91041501052600 | 0.87477491918300 | T | T | T |
| 0.17797926720100 | 0.93269132305500 | 0.27368311051500 | T | T | T |
| 0.17747357231400 | 0.93562013668900 | 0.60358145135700 | T | T | T |
| 0.17759322317100 | 0.93626516478000 | 0.93678365708900 | T | T | T |
| 0.51071080263400 | 0.93579575415400 | 0.27022427617900 | T | T | T |
| 0.51082605238200 | 0.93573886691200 | 0.60354112970300 | T | T | T |
| 0.51080824506000 | 0.93591027725800 | 0.93687136852700 | T | T | T |
| 0.84414713869200 | 0.93589488065600 | 0.27026953719300 | T | T | T |
| 0.84413963915100 | 0.93566290927200 | 0.60357600259700 | T | T | T |
| 0.84417801463000 | 0.93596746045800 | 0.93685842773300 | T | T | T |
| 0.14522432193600 | 0.93524290294800 | 0.27051023574000 | T | T | T |
| 0.14445689718100 | 0.93902612965000 | 0.59959274178500 | T | T | T |
| 0.14453071727600 | 0.93951353582500 | 0.93292647116600 | T | T | T |
| 0.47768350220900 | 0.93907214981000 | 0.26628579961600 | T | T | T |
| 0.47779801592300 | 0.93907968955000 | 0.59958995776700 | T | T | T |
| 0.47776998053100 | 0.93924210697600 | 0.93290100809800 | T | T | T |
| 0.81111215270300 | 0.93926797023700 | 0.26624434122100 | T | T | T |
| 0.81112142636600 | 0.93907687076300 | 0.59956843017900 | T | T | T |

|                  |                  |                  |   |   |   |
|------------------|------------------|------------------|---|---|---|
| 0.81113619792700 | 0.93927858622300 | 0.93290508520600 | T | T | T |
| 0.23725312867600 | 0.87532333359600 | 0.24462500290500 | T | T | T |
| 0.23592904412200 | 0.87926588726700 | 0.57085339779500 | T | T | T |
| 0.23604262733500 | 0.87938245265600 | 0.90430908583900 | T | T | T |
| 0.56911614525100 | 0.87922567821400 | 0.23762198952700 | T | T | T |
| 0.56926799010800 | 0.87936413211900 | 0.57094728954200 | T | T | T |
| 0.56926092417700 | 0.87937196355000 | 0.90441188301500 | T | T | T |
| 0.90277791031500 | 0.87938744118700 | 0.23756249200800 | T | T | T |
| 0.90264683667700 | 0.87935233142900 | 0.57095595257700 | T | T | T |
| 0.90261716259400 | 0.87935707497800 | 0.90443066318100 | T | T | T |
| 0.15124382914600 | 0.95795858945100 | 0.18361052947700 | T | T | T |
| 0.14363975817700 | 0.96140794835100 | 0.51050404039100 | T | T | T |
| 0.14348631310900 | 0.96135221129800 | 0.84389868542200 | T | T | T |
| 0.47670311119000 | 0.96131319581300 | 0.17716410884800 | T | T | T |
| 0.47698855373100 | 0.96133984424300 | 0.51043697441900 | T | T | T |
| 0.47692974083400 | 0.96132349081800 | 0.84384695411000 | T | T | T |
| 0.81041365121900 | 0.96164234454100 | 0.17743512633800 | T | T | T |
| 0.81037138574900 | 0.96135849080500 | 0.51046668277800 | T | T | T |
| 0.81028750333500 | 0.96134807858700 | 0.84388023055000 | T | T | T |
| 0.20899151581400 | 0.86724291155100 | 0.15929018998600 | T | T | T |
| 0.17700275393500 | 0.95809424183400 | 0.51133169215700 | T | T | T |
| 0.17683686828900 | 0.95808790978400 | 0.84475089290200 | T | T | T |
| 0.51007162660100 | 0.95812188516200 | 0.17792329079900 | T | T | T |
| 0.51035122012700 | 0.95814227763900 | 0.51127882762200 | T | T | T |
| 0.51029232511900 | 0.95821364730800 | 0.84467599779400 | T | T | T |
| 0.84378062439400 | 0.95848790867400 | 0.17832357883600 | T | T | T |
| 0.84373633811000 | 0.95815298926700 | 0.51130190016300 | T | T | T |
| 0.84364748802100 | 0.95820336910700 | 0.84469688156100 | T | T | T |
| 0.03180552613000 | 0.37597646775500 | 0.22394988418300 | T | T | T |
| 0.03189704721980 | 0.37487893970100 | 0.55667548068800 | T | T | T |

|                  |                  |                  |   |   |   |
|------------------|------------------|------------------|---|---|---|
| 0.03177162003600 | 0.37594222160200 | 0.89032980551900 | T | T | T |
| 0.36470565637800 | 0.37586509295200 | 0.22392209773200 | T | T | T |
| 0.36524153190500 | 0.37531115325000 | 0.55691190190200 | T | T | T |
| 0.36514463600500 | 0.37589936816200 | 0.89011894137200 | T | T | T |
| 0.69846464852600 | 0.37606477769900 | 0.22354253548500 | T | T | T |
| 0.69857954602000 | 0.37532544847700 | 0.55684204854400 | T | T | T |
| 0.69848505478000 | 0.37592477419300 | 0.89020243018200 | T | T | T |
| 0.06294246205560 | 0.33544575917200 | 0.24000282180100 | T | T | T |
| 0.06174094886110 | 0.33430737427900 | 0.57417232070200 | T | T | T |
| 0.06182894334830 | 0.33537513905000 | 0.90762648277000 | T | T | T |
| 0.39446439355200 | 0.33518249049200 | 0.24145733891400 | T | T | T |
| 0.39504117413200 | 0.33425045894700 | 0.57407929095700 | T | T | T |
| 0.39502862053100 | 0.33533930274400 | 0.90766164503000 | T | T | T |
| 0.72818625398900 | 0.33524224600500 | 0.24110054067900 | T | T | T |
| 0.72833234249000 | 0.33423443282500 | 0.57403863408300 | T | T | T |
| 0.72834550571400 | 0.33529322131400 | 0.90768129411100 | T | T | T |
| 0.00231456713642 | 0.36375104203000 | 0.24169299870600 | T | T | T |
| 0.00204753647244 | 0.36358381762300 | 0.57338168851300 | T | T | T |
| 0.00197157958407 | 0.36408489998500 | 0.90719725956400 | T | T | T |
| 0.33449857224600 | 0.36455013514200 | 0.24052566623500 | T | T | T |
| 0.33540300733600 | 0.36396304143500 | 0.57370528553100 | T | T | T |
| 0.33530632479900 | 0.36421289863400 | 0.90685561428700 | T | T | T |
| 0.66862883031300 | 0.36446759612100 | 0.24032952149300 | T | T | T |
| 0.66872726827500 | 0.36404660964700 | 0.57361024000600 | T | T | T |
| 0.66864420541600 | 0.36418653883700 | 0.90696377932900 | T | T | T |
| 0.00528238176984 | 0.35251711518000 | 0.20787366403200 | T | T | T |
| 0.00564425335024 | 0.35120386959400 | 0.53979603257800 | T | T | T |
| 0.00556324493559 | 0.35220547340100 | 0.87357215520000 | T | T | T |
| 0.33841056750600 | 0.35266357453800 | 0.20705059279100 | T | T | T |
| 0.33889833412400 | 0.35189255773200 | 0.54014809631600 | T | T | T |

|                  |                  |                  |   |   |   |
|------------------|------------------|------------------|---|---|---|
| 0.33899704707100 | 0.35208450595200 | 0.87326375410100 | T | T | T |
| 0.67225791169200 | 0.35229502320400 | 0.20679554685800 | T | T | T |
| 0.67223613750100 | 0.35189664319200 | 0.54006683434000 | T | T | T |
| 0.67232811536000 | 0.35215546472700 | 0.87336146069100 | T | T | T |
| 0.01297178231560 | 0.32545187216900 | 0.26948134780800 | T | T | T |
| 0.01247498603810 | 0.32623515672900 | 0.60216266684200 | T | T | T |
| 0.01244883425550 | 0.32611863561600 | 0.93535386865500 | T | T | T |
| 0.34433636889800 | 0.32659575165400 | 0.26899599241000 | T | T | T |
| 0.34586665237100 | 0.32611535183200 | 0.60212280342600 | T | T | T |
| 0.34575987569400 | 0.32648249244900 | 0.93527445942600 | T | T | T |
| 0.67907911895300 | 0.32656237393200 | 0.26862394648100 | T | T | T |
| 0.67916799316000 | 0.32627144557800 | 0.60210246550200 | T | T | T |
| 0.67909346764300 | 0.32634505580700 | 0.93528088355400 | T | T | T |
| 0.31148184879300 | 0.32597299460400 | 0.26386545894900 | T | T | T |
| 0.31289604475700 | 0.32605248540800 | 0.59780691546000 | T | T | T |
| 0.31279618255800 | 0.32641664793500 | 0.93097069208000 | T | T | T |
| 0.64611793058700 | 0.32650416899100 | 0.26431567442800 | T | T | T |
| 0.64620994756200 | 0.32616608420800 | 0.59775153137600 | T | T | T |
| 0.64611970452500 | 0.32633243320500 | 0.93098274338800 | T | T | T |
| 0.97993082851100 | 0.32568971715900 | 0.26531251112700 | T | T | T |
| 0.97952370444400 | 0.32609091039300 | 0.59780297409200 | T | T | T |
| 0.97946598716500 | 0.32612681474900 | 0.93106512675000 | T | T | T |
| 0.07738236500270 | 0.38263798594900 | 0.23827104432800 | T | T | T |
| 0.07347901406930 | 0.38286457499400 | 0.57754582995600 | T | T | T |
| 0.07344759053300 | 0.38394101913100 | 0.91111061180600 | T | T | T |
| 0.40655611838500 | 0.38358279795200 | 0.24446413538400 | T | T | T |
| 0.40693181297000 | 0.38269259654700 | 0.57758419721500 | T | T | T |
| 0.40671961517500 | 0.38387671102100 | 0.91111457291400 | T | T | T |
| 0.74023798474400 | 0.38362617009000 | 0.24432093191700 | T | T | T |
| 0.74020636449400 | 0.38267257369700 | 0.57761217318200 | T | T | T |

|                  |                  |                  |   |   |   |
|------------------|------------------|------------------|---|---|---|
| 0.74014795039800 | 0.38378190302400 | 0.91107392759300 | T | T | T |
| 0.31621554783800 | 0.30311503545100 | 0.17880274522100 | T | T | T |
| 0.31693094679100 | 0.30305561230600 | 0.51153968543900 | T | T | T |
| 0.31710128939900 | 0.30311908405100 | 0.84464894115900 | T | T | T |
| 0.65030497877700 | 0.30309475290100 | 0.17838916850600 | T | T | T |
| 0.65026504098600 | 0.30306127687800 | 0.51148927251300 | T | T | T |
| 0.65044820727300 | 0.30314038764200 | 0.84472764389500 | T | T | T |
| 0.98399667081200 | 0.30299555793800 | 0.17824638491700 | T | T | T |
| 0.98376851473500 | 0.30299242845700 | 0.51102611789900 | T | T | T |
| 0.98361101794900 | 0.30311654700100 | 0.84500300828500 | T | T | T |
| 0.01737340071350 | 0.29996203130300 | 0.17784718012400 | T | T | T |
| 0.01718057944900 | 0.29917154473800 | 0.51005077966700 | T | T | T |
| 0.01697411597100 | 0.29923763946000 | 0.84398143676900 | T | T | T |
| 0.34955868872300 | 0.29908414994500 | 0.17740334310900 | T | T | T |
| 0.35030416105200 | 0.29918265434900 | 0.51054532150000 | T | T | T |
| 0.35048076932400 | 0.29932641373700 | 0.84364472813300 | T | T | T |
| 0.68366653165100 | 0.29921634627500 | 0.17738159106700 | T | T | T |
| 0.68364134053300 | 0.29920636578500 | 0.51049032431700 | T | T | T |
| 0.68382147985100 | 0.29934044864600 | 0.84371806253200 | T | T | T |
| 0.03206106715340 | 0.88754679578500 | 0.22387692475000 | T | T | T |
| 0.03205945490970 | 0.88771567206200 | 0.55763176188000 | T | T | T |
| 0.03205181353870 | 0.88779859749800 | 0.89104590791500 | T | T | T |
| 0.36507640176500 | 0.88828083873000 | 0.22436445529700 | T | T | T |
| 0.36538224970300 | 0.88773784402500 | 0.55764907192300 | T | T | T |
| 0.36538402238300 | 0.88767224426400 | 0.89106512624200 | T | T | T |
| 0.69872963163600 | 0.88777813312400 | 0.22438757870800 | T | T | T |
| 0.69870696015200 | 0.88774021617900 | 0.55764182956400 | T | T | T |
| 0.69871726573500 | 0.88770171678300 | 0.89107914348100 | T | T | T |
| 0.06267228892430 | 0.92890418181100 | 0.23945348823700 | T | T | T |
| 0.06169437009100 | 0.92868916059000 | 0.57408885722800 | T | T | T |

|                  |                  |                  |   |   |   |
|------------------|------------------|------------------|---|---|---|
| 0.06163340196580 | 0.92880646431000 | 0.90755666995600 | T | T | T |
| 0.39459243705700 | 0.92889496285300 | 0.24129221313400 | T | T | T |
| 0.39501219439600 | 0.92875049487100 | 0.57408864403300 | T | T | T |
| 0.39504293684000 | 0.92866117549900 | 0.90743511811500 | T | T | T |
| 0.72823027667900 | 0.92883919345100 | 0.24092810170600 | T | T | T |
| 0.72833654377200 | 0.92877002835500 | 0.57403747482300 | T | T | T |
| 0.72831996803400 | 0.92874701522300 | 0.90746492002700 | T | T | T |
| 0.00253146624949 | 0.89841281619000 | 0.24171759266000 | T | T | T |
| 0.00229071155212 | 0.89857891343700 | 0.57473847921900 | T | T | T |
| 0.00225913837896 | 0.89863651971700 | 0.90811958187300 | T | T | T |
| 0.33504622741600 | 0.89876533636500 | 0.24150924386700 | T | T | T |
| 0.33561978741400 | 0.89858285477800 | 0.57476824632000 | T | T | T |
| 0.33560923155600 | 0.89860781328100 | 0.90815538760900 | T | T | T |
| 0.66894413094800 | 0.89857218062400 | 0.24147384671700 | T | T | T |
| 0.66894554865600 | 0.89859501144900 | 0.57477064106000 | T | T | T |
| 0.66893651122000 | 0.89859337702000 | 0.90819056699900 | T | T | T |
| 0.00508439585588 | 0.91017348444700 | 0.20787143695100 | T | T | T |
| 0.00537918299630 | 0.91055092431300 | 0.54093166672600 | T | T | T |
| 0.00537585655356 | 0.91055744508800 | 0.87429516020400 | T | T | T |
| 0.33830457454300 | 0.91097317144600 | 0.20783640607800 | T | T | T |
| 0.33868868780800 | 0.91055164178200 | 0.54096204132800 | T | T | T |
| 0.33871315718200 | 0.91049414012400 | 0.87433796800200 | T | T | T |
| 0.67203298655500 | 0.91052833915900 | 0.20767893459700 | T | T | T |
| 0.67201174543800 | 0.91054267191800 | 0.54095133524800 | T | T | T |
| 0.67202291719300 | 0.91046940777700 | 0.87437022376200 | T | T | T |
| 0.01311819106400 | 0.93591574964400 | 0.27022471960300 | T | T | T |
| 0.01282169411020 | 0.93587817595000 | 0.60347655252100 | T | T | T |
| 0.01275366848860 | 0.93591784100100 | 0.93688108697500 | T | T | T |
| 0.34512804689500 | 0.93593288221000 | 0.27026248497000 | T | T | T |
| 0.34616588399300 | 0.93592164545300 | 0.60347072125900 | T | T | T |

|                  |                  |                  |   |   |   |
|------------------|------------------|------------------|---|---|---|
| 0.34614639064800 | 0.93595311508700 | 0.93685323091300 | T | T | T |
| 0.67945290861800 | 0.93589421597400 | 0.27022577461000 | T | T | T |
| 0.67948968183800 | 0.93589441073600 | 0.60348078871600 | T | T | T |
| 0.67945913235800 | 0.93594453377400 | 0.93686762608200 | T | T | T |
| 0.31222528451800 | 0.93597640066000 | 0.26539129970700 | T | T | T |
| 0.31319061809700 | 0.93557731583600 | 0.59937406903200 | T | T | T |
| 0.31316249052200 | 0.93562514809900 | 0.93273804223300 | T | T | T |
| 0.64648607178300 | 0.93562002665000 | 0.26603414004100 | T | T | T |
| 0.64651709733500 | 0.93557061138600 | 0.59935863197800 | T | T | T |
| 0.64647944723500 | 0.93562866009300 | 0.93271712883600 | T | T | T |
| 0.98011596197700 | 0.93555096390500 | 0.26611060111100 | T | T | T |
| 0.97984889854600 | 0.93555169937000 | 0.59935564037700 | T | T | T |
| 0.97978875934600 | 0.93562737111500 | 0.93269335364500 | T | T | T |
| 0.07783257652490 | 0.88221495549200 | 0.23763453695200 | T | T | T |
| 0.07416280534770 | 0.88046480197700 | 0.57718586760400 | T | T | T |
| 0.07405670339950 | 0.88057673728000 | 0.91073436534600 | T | T | T |
| 0.40703369922000 | 0.88058820266200 | 0.24406558785300 | T | T | T |
| 0.40750685077700 | 0.88054485505800 | 0.57718385116400 | T | T | T |
| 0.40739903513700 | 0.88042129553600 | 0.91073707372500 | T | T | T |
| 0.74079487193200 | 0.88066949185900 | 0.24398603120400 | T | T | T |
| 0.74080485097900 | 0.88056463437200 | 0.57720971673700 | T | T | T |
| 0.74076862083800 | 0.88054301957100 | 0.91069679854200 | T | T | T |
| 0.31621859306000 | 0.95995247835800 | 0.17883998425900 | T | T | T |
| 0.31689098877000 | 0.95806003973300 | 0.51132646949900 | T | T | T |
| 0.31688728391100 | 0.95802927039600 | 0.84467467477700 | T | T | T |
| 0.65023311975100 | 0.95813491790200 | 0.17807122078000 | T | T | T |
| 0.65021367440600 | 0.95803900917200 | 0.51128805319900 | T | T | T |
| 0.65022120329700 | 0.95808202006500 | 0.84471541728700 | T | T | T |
| 0.98374587161300 | 0.95850820240800 | 0.17785849295100 | T | T | T |
| 0.98358821056400 | 0.95806717998500 | 0.51128532312200 | T | T | T |

|                  |                  |                  |   |   |   |
|------------------|------------------|------------------|---|---|---|
| 0.98359005939400 | 0.95804083541900 | 0.84463193230500 | T | T | T |
| 0.01719197441000 | 0.96131750190500 | 0.17751876042600 | T | T | T |
| 0.01701380960220 | 0.96164757215000 | 0.51031444286000 | T | T | T |
| 0.01701955704010 | 0.96161811950500 | 0.84364235626400 | T | T | T |
| 0.34963384590300 | 0.96361576912500 | 0.17755036147700 | T | T | T |
| 0.35031467304000 | 0.96164632382200 | 0.51036215384100 | T | T | T |
| 0.35031112629300 | 0.96163760531000 | 0.84370225738200 | T | T | T |
| 0.68365729769900 | 0.96168695906900 | 0.17708817149700 | T | T | T |
| 0.68363976639300 | 0.96159560253700 | 0.51031148982000 | T | T | T |
| 0.68364413010200 | 0.96162839665900 | 0.84374462743800 | T | T | T |
| 0.22761536917100 | 0.36987522721900 | 0.23083601346100 | T | T | T |
| 0.22264772979900 | 0.36472511129100 | 0.56120288134900 | T | T | T |
| 0.22277842620500 | 0.36560117996500 | 0.89447038441600 | T | T | T |
| 0.55607392589800 | 0.36496155964800 | 0.22794514488600 | T | T | T |
| 0.55606672839500 | 0.36475580223200 | 0.56128645366800 | T | T | T |
| 0.55628035115000 | 0.36496036129600 | 0.89488156937500 | T | T | T |
| 0.88960659868900 | 0.36475922688100 | 0.22818603850700 | T | T | T |
| 0.88954847999400 | 0.36470468064100 | 0.56152361388100 | T | T | T |
| 0.88957096811800 | 0.36492204310600 | 0.89473969463500 | T | T | T |
| 0.16999214176300 | 0.37733821285100 | 0.22100629163500 | T | T | T |
| 0.16807804110400 | 0.37435903489400 | 0.55674871555900 | T | T | T |
| 0.16808911955800 | 0.37456941369700 | 0.89023511826200 | T | T | T |
| 0.50145534972700 | 0.37447120533400 | 0.22356934019200 | T | T | T |
| 0.50150799574100 | 0.37438784786300 | 0.55687176092800 | T | T | T |
| 0.50173092082200 | 0.37453648653400 | 0.89031867384100 | T | T | T |
| 0.83510086694700 | 0.37452560383700 | 0.22366253845800 | T | T | T |
| 0.83503708724700 | 0.37437971242900 | 0.55691728003800 | T | T | T |
| 0.83502945631500 | 0.37451408181700 | 0.89028669891500 | T | T | T |
| 0.16017393556200 | 0.34963701242800 | 0.27181565787500 | T | T | T |
| 0.15885023843000 | 0.34557151532000 | 0.60260568869700 | T | T | T |



|                  |                  |                  |   |   |   |
|------------------|------------------|------------------|---|---|---|
| 0.15939572172300 | 0.34559242971400 | 0.93609052534000 | T | T | T |
| 0.49235350165900 | 0.34564073782700 | 0.26939243564400 | T | T | T |
| 0.49218916708700 | 0.34551143933700 | 0.60267568713700 | T | T | T |
| 0.49235119784800 | 0.34566454556300 | 0.93604538238100 | T | T | T |
| 0.82573460080500 | 0.34562547293900 | 0.26941349394500 | T | T | T |
| 0.82547049243400 | 0.34554980439300 | 0.60268696218700 | T | T | T |
| 0.82574152953800 | 0.34563779966700 | 0.93604217037500 | T | T | T |
| 0.16496651008100 | 0.30447561036600 | 0.19832172052100 | T | T | T |
| 0.15975257056800 | 0.30771955542700 | 0.52390019149200 | T | T | T |
| 0.16004427174600 | 0.30767895916000 | 0.85733861276500 | T | T | T |
| 0.49323649162300 | 0.30753058730500 | 0.19078308172100 | T | T | T |
| 0.49334215082800 | 0.30753643661100 | 0.52408642120000 | T | T | T |
| 0.49332788592300 | 0.30779921862300 | 0.85727231807300 | T | T | T |
| 0.82683283574600 | 0.30753194919200 | 0.19086086075700 | T | T | T |
| 0.82678752137600 | 0.30753541930100 | 0.52411093010800 | T | T | T |
| 0.82663252020100 | 0.30782230484400 | 0.85725897146500 | T | T | T |
| 0.22756114378800 | 0.89347594786400 | 0.23118807886800 | T | T | T |
| 0.22351790597300 | 0.89885135213500 | 0.56049479970000 | T | T | T |
| 0.22356130333300 | 0.89892656192000 | 0.89399555615300 | T | T | T |
| 0.55682536664600 | 0.89882830641800 | 0.22715286887200 | T | T | T |
| 0.55686364131800 | 0.89887774439400 | 0.56053376924100 | T | T | T |
| 0.5568777939200  | 0.89886460691900 | 0.89396172905800 | T | T | T |
| 0.89022499158100 | 0.89895256396100 | 0.22734646286600 | T | T | T |
| 0.89020992629900 | 0.89887932197000 | 0.56058748899900 | T | T | T |
| 0.89022459062800 | 0.89884217009900 | 0.89398382722600 | T | T | T |
| 0.17002692537100 | 0.88399054623200 | 0.22191158163700 | T | T | T |
| 0.16933112113700 | 0.88694289925800 | 0.55529705757100 | T | T | T |
| 0.16935269639400 | 0.88698728156400 | 0.88877962426900 | T | T | T |
| 0.50261662460400 | 0.88698466945400 | 0.22195849872900 | T | T | T |
| 0.50268436134900 | 0.88696864350200 | 0.55530975952100 | T | T | T |

|                  |                  |                  |   |   |   |
|------------------|------------------|------------------|---|---|---|
| 0.50268690293600 | 0.88695895478100 | 0.88870048330100 | T | T | T |
| 0.83607273130200 | 0.88694127447200 | 0.22209037589500 | T | T | T |
| 0.83603967737000 | 0.88695097574200 | 0.55531353811500 | T | T | T |
| 0.83603245702100 | 0.88696648395800 | 0.88871888215400 | T | T | T |
| 0.16102600195600 | 0.91352171737100 | 0.27231995472600 | T | T | T |
| 0.16042457694900 | 0.91642161369500 | 0.60109375931200 | T | T | T |
| 0.16054947242400 | 0.91697753468300 | 0.93445024723200 | T | T | T |
| 0.49368403793400 | 0.91654560684700 | 0.26775387754300 | T | T | T |
| 0.49378391102700 | 0.91650154104100 | 0.60108640677100 | T | T | T |
| 0.49376735556000 | 0.91666952776900 | 0.93442129561600 | T | T | T |
| 0.82709786701100 | 0.91669012336300 | 0.26778179755700 | T | T | T |
| 0.82708943278200 | 0.91646390673400 | 0.60108590937800 | T | T | T |
| 0.82713749131900 | 0.91671689421600 | 0.93442653151600 | T | T | T |
| 0.16522092149600 | 0.95621559968000 | 0.19845753800300 | T | T | T |
| 0.16037959104900 | 0.95357184751800 | 0.52318115357700 | T | T | T |
| 0.16021107823200 | 0.95348673705100 | 0.85658287059400 | T | T | T |
| 0.49347910856700 | 0.95348615484000 | 0.18979760838700 | T | T | T |
| 0.49371941104300 | 0.95352203325400 | 0.52310264906000 | T | T | T |
| 0.49367137825700 | 0.95352209644100 | 0.85650375425900 | T | T | T |
| 0.82714293656900 | 0.95388091756700 | 0.19015396364900 | T | T | T |
| 0.82710700726900 | 0.95354784970300 | 0.52313349915200 | T | T | T |
| 0.82702917175700 | 0.95354317212100 | 0.85653139744400 | T | T | T |
| 0.06319521512130 | 0.36356621428800 | 0.22975421554300 | T | T | T |
| 0.06311501413560 | 0.36361478905300 | 0.56514629014800 | T | T | T |
| 0.06310790533080 | 0.36472581130900 | 0.89867357719000 | T | T | T |
| 0.39606156298900 | 0.36426114413100 | 0.23220456664100 | T | T | T |
| 0.39643378232900 | 0.36365265821600 | 0.56516509162500 | T | T | T |
| 0.39640747838600 | 0.36464732784200 | 0.89866249774600 | T | T | T |
| 0.72970091321700 | 0.36445978823000 | 0.23200905326800 | T | T | T |
| 0.72975332517400 | 0.36365672108200 | 0.56514655573000 | T | T | T |

|                  |                  |                  |   |   |   |
|------------------|------------------|------------------|---|---|---|
| 0.72974555917100 | 0.36459174204400 | 0.89867056007800 | T | T | T |
| 0.00978509488511 | 0.37617637879600 | 0.22187724648300 | T | T | T |
| 0.00999460990722 | 0.37529309623900 | 0.55377810210800 | T | T | T |
| 0.00987254310240 | 0.37625461098800 | 0.88752572271300 | T | T | T |
| 0.34283556596600 | 0.37655129156400 | 0.22101065830400 | T | T | T |
| 0.34332016199800 | 0.37594141326900 | 0.55408913068400 | T | T | T |
| 0.34325880061400 | 0.37619404430400 | 0.88720941463100 | T | T | T |
| 0.67657012663800 | 0.37646097919800 | 0.22067390801100 | T | T | T |
| 0.67665864623400 | 0.37597396533800 | 0.55399479504000 | T | T | T |
| 0.67658971638500 | 0.37623888185500 | 0.88731326720100 | T | T | T |
| 0.32814456259300 | 0.34710599856700 | 0.26560125273000 | T | T | T |
| 0.32969065989400 | 0.34691389379400 | 0.59912410139400 | T | T | T |
| 0.32957969868100 | 0.34731126991000 | 0.93226302155400 | T | T | T |
| 0.66289872383700 | 0.34739039959500 | 0.26565191318800 | T | T | T |
| 0.66299273250800 | 0.34705370450300 | 0.59906693480700 | T | T | T |
| 0.66291941353100 | 0.34720376201400 | 0.93230530036100 | T | T | T |
| 0.99676187070200 | 0.34637914580100 | 0.26680939300500 | T | T | T |
| 0.99630255148300 | 0.34697501039900 | 0.59903944028000 | T | T | T |
| 0.99626908177200 | 0.34697825136900 | 0.93242331212600 | T | T | T |
| 0.00101416023029 | 0.30773477360200 | 0.19016792728200 | T | T | T |
| 0.00101827410218 | 0.30745992041000 | 0.52268648002500 | T | T | T |
| 0.00085835641403 | 0.30761001769400 | 0.85665683536700 | T | T | T |
| 0.33360934058900 | 0.30740193788300 | 0.19028043438600 | T | T | T |
| 0.33416770696100 | 0.30751624156700 | 0.52321406651500 | T | T | T |
| 0.33435060936000 | 0.30768642277500 | 0.85628485018000 | T | T | T |
| 0.66754340846500 | 0.30758635455600 | 0.19006239137000 | T | T | T |
| 0.66750604188600 | 0.30755234320900 | 0.52315145934900 | T | T | T |
| 0.66769729417600 | 0.30765791427300 | 0.85637576654000 | T | T | T |
| 0.06325187292420 | 0.90069399832000 | 0.22921790640800 | T | T | T |
| 0.06322782580320 | 0.89936137515500 | 0.56502649849600 | T | T | T |

|                  |                  |                  |   |   |   |
|------------------|------------------|------------------|---|---|---|
| 0.06320981803380 | 0.89947225132000 | 0.89850084304300 | T | T | T |
| 0.39630573887300 | 0.89982606792000 | 0.23193850276600 | T | T | T |
| 0.39655533638200 | 0.89942419859300 | 0.56502665259400 | T | T | T |
| 0.39655494881900 | 0.89925546591400 | 0.89846575238200 | T | T | T |
| 0.72986313520600 | 0.89955956795200 | 0.23182376835200 | T | T | T |
| 0.72988632993500 | 0.89941142063800 | 0.56501002527700 | T | T | T |
| 0.72987330680600 | 0.89936719799700 | 0.89846341184700 | T | T | T |
| 0.00999209624503 | 0.88670437058200 | 0.22194933482500 | T | T | T |
| 0.01004798070160 | 0.88696925555400 | 0.55510963283000 | T | T | T |
| 0.01004328478940 | 0.88700096226100 | 0.88850165067300 | T | T | T |
| 0.34307990556600 | 0.88733840995800 | 0.22180885856700 | T | T | T |
| 0.34337002889000 | 0.88696754105000 | 0.55513739413300 | T | T | T |
| 0.34337407363100 | 0.88694221598500 | 0.88852917112700 | T | T | T |
| 0.67671709909700 | 0.88695577726400 | 0.22184892965300 | T | T | T |
| 0.67669345127700 | 0.88697159630700 | 0.55513098225600 | T | T | T |
| 0.67669965226900 | 0.88692217412500 | 0.88855324250600 | T | T | T |
| 0.32903921448600 | 0.91514611792500 | 0.26707633387300 | T | T | T |
| 0.33005720152300 | 0.91492655026100 | 0.60068435800900 | T | T | T |
| 0.33003240423500 | 0.91497009407800 | 0.93403794182500 | T | T | T |
| 0.66334136771600 | 0.91494183195800 | 0.26737227064600 | T | T | T |
| 0.66337981481500 | 0.91490496547800 | 0.60067762109600 | T | T | T |
| 0.66334872014400 | 0.91496223463000 | 0.93404526105300 | T | T | T |
| 0.99697434404900 | 0.91495763648300 | 0.26744372677800 | T | T | T |
| 0.99671137862600 | 0.91489654003800 | 0.60066257076200 | T | T | T |
| 0.99664686656800 | 0.91495903845100 | 0.93402311340700 | T | T | T |
| 0.00076549537157 | 0.95357032878800 | 0.18978898001600 | T | T | T |
| 0.00083288517872 | 0.95351592026300 | 0.52294933156200 | T | T | T |
| 0.00084500885936 | 0.95345982106200 | 0.85628266290200 | T | T | T |
| 0.33357217554600 | 0.95581959869800 | 0.19046130212200 | T | T | T |
| 0.33413324422800 | 0.95351512825600 | 0.52299754841000 | T | T | T |

|                  |                  |                  |   |   |   |
|------------------|------------------|------------------|---|---|---|
| 0.33413303560700 | 0.95345632125000 | 0.85633064187500 | T | T | T |
| 0.66748053355100 | 0.95355446095900 | 0.18974117540900 | T | T | T |
| 0.66746122227000 | 0.95346634370600 | 0.52294335783100 | T | T | T |
| 0.66746489881800 | 0.95350783563800 | 0.85638329543000 | T | T | T |

**C. Catalytic reaction of  $*\text{COOH} + \text{H}^+_{\text{sol}} + e^- \rightarrow \text{CO} + \text{H}_2\text{O}$  on the semiconductor**

**GaP surface**

**1) Small supercell 1- $\text{H}^+_{\text{sol}}$  IS**

POSCAR

1

|                    |                    |                    |
|--------------------|--------------------|--------------------|
| 15.60575999998655  | 0.0000000000000000 | 0.0000000000000000 |
| 0.0000000000000000 | 16.55240999999278  | 0.0000000000000000 |
| 0.0000000000000000 | 0.0000000000000000 | 30.38812199999634  |

Ga P H O C

60 60 20 12 2

Direct

|                  |                  |                  |   |   |   |
|------------------|------------------|------------------|---|---|---|
| 0.00207067300541 | 0.02247474789990 | 0.01560455483630 | T | T | T |
| 0.99702274729600 | 0.68983846696500 | 0.01556430334140 | T | T | T |
| 0.00340992066564 | 0.35360216632300 | 0.01581750989970 | T | T | T |
| 0.49847161193900 | 0.02646457779790 | 0.01539139778170 | T | T | T |
| 0.49203367174400 | 0.67686460391700 | 0.01221389524850 | T | T | T |
| 0.48954942898100 | 0.30953235688700 | 0.98111129375400 | T | T | T |
| 0.25042297310600 | 0.02250287426460 | 0.01574128103900 | T | T | T |
| 0.24319370824300 | 0.68480048965500 | 0.01595012967740 | T | T | T |
| 0.25091373364600 | 0.36025460730400 | 0.01491493457500 | T | T | T |
| 0.74970298054900 | 0.02291894803370 | 0.01568877837810 | T | T | T |
| 0.74991506005800 | 0.68965736888400 | 0.01575496144150 | T | T | T |
| 0.76319056200200 | 0.34758041662200 | 0.01860564214410 | T | T | T |
| 0.38162000083900 | 0.16750585777900 | 0.06470560111280 | T | T | T |

|                  |                  |                  |   |   |   |
|------------------|------------------|------------------|---|---|---|
| 0.37501626172100 | 0.83309736629100 | 0.06489604844720 | T | T | T |
| 0.37588619716800 | 0.49093522558100 | 0.06361374342810 | T | T | T |
| 0.87688329378100 | 0.16387720709000 | 0.06438550358420 | T | T | T |
| 0.87555304636800 | 0.83277114334300 | 0.06441689718130 | T | T | T |
| 0.87620508148100 | 0.49723693151800 | 0.06426155726760 | T | T | T |
| 0.12923703841700 | 0.16554050052500 | 0.06428967910430 | T | T | T |
| 0.12426250608800 | 0.82981651484700 | 0.06420536393540 | T | T | T |
| 0.12418967506800 | 0.49745537434700 | 0.06422923721960 | T | T | T |
| 0.61749091106000 | 0.16589108201200 | 0.06449105854750 | T | T | T |
| 0.62352893157200 | 0.83347953916400 | 0.06439914381330 | T | T | T |
| 0.62388869112100 | 0.50208173708600 | 0.06687051797730 | T | T | T |
| 0.00000000000000 | 0.00000000000000 | 0.13043999673400 | F | F | F |
| 0.00000000000000 | 0.66667002414000 | 0.13043999673400 | F | F | F |
| 0.00000000000000 | 0.33333000540000 | 0.13043999673400 | F | F | F |
| 0.50000000002500 | 0.00000000000000 | 0.13043999673400 | F | F | F |
| 0.50000000002500 | 0.66667002414000 | 0.13043999673400 | F | F | F |
| 0.50000000002500 | 0.33333000540000 | 0.13043999673400 | F | F | F |
| 0.24999999998000 | 0.00000000000000 | 0.13043999673400 | F | F | F |
| 0.24999999998000 | 0.66667002414000 | 0.13043999673400 | F | F | F |
| 0.24999999998000 | 0.33333000540000 | 0.13043999673400 | F | F | F |
| 0.75000000026600 | 0.00000000000000 | 0.13043999673400 | F | F | F |
| 0.75000000026600 | 0.66667002414000 | 0.13043999673400 | F | F | F |
| 0.75000000026600 | 0.33333000540000 | 0.13043999673400 | F | F | F |
| 0.37819995316800 | 0.17020479285000 | 0.19582390151800 | T | T | T |
| 0.37532598856600 | 0.83279151067400 | 0.19597405825200 | T | T | T |
| 0.37606613904600 | 0.49034864196300 | 0.19898207339100 | T | T | T |
| 0.87651778912600 | 0.16432671402900 | 0.19626441177000 | T | T | T |
| 0.87563284140600 | 0.83286080161500 | 0.19620967563600 | T | T | T |
| 0.87599917587200 | 0.49725787638900 | 0.19644783441000 | T | T | T |
| 0.12889190816900 | 0.16555991134700 | 0.19638268288400 | T | T | T |

|                  |                  |                  |   |   |   |
|------------------|------------------|------------------|---|---|---|
| 0.12432727661900 | 0.83001740428500 | 0.19643783291900 | T | T | T |
| 0.12437333844100 | 0.49739990717400 | 0.19647362524400 | T | T | T |
| 0.61743792822200 | 0.16602635658800 | 0.19614651069600 | T | T | T |
| 0.62362829899500 | 0.83341317247700 | 0.19637054124300 | T | T | T |
| 0.62392793624900 | 0.49811388999700 | 0.19598400460900 | T | T | T |
| 0.00193489726119 | 0.02259651942970 | 0.24496142850100 | T | T | T |
| 0.99728519198300 | 0.68986663680500 | 0.24497445416900 | T | T | T |
| 0.00345204874984 | 0.35373207365200 | 0.24489236963700 | T | T | T |
| 0.49800828805000 | 0.02714062462860 | 0.24505127757200 | T | T | T |
| 0.49575516719400 | 0.67684369965700 | 0.24863347873000 | T | T | T |
| 0.48916084488300 | 0.30414466164000 | 0.27959802669600 | T | T | T |
| 0.25032198200300 | 0.02267835454100 | 0.24481260275300 | T | T | T |
| 0.24367332836300 | 0.68485742098200 | 0.24470083863500 | T | T | T |
| 0.25075172129200 | 0.36060154180900 | 0.24818181626600 | T | T | T |
| 0.74962060681700 | 0.02310792229510 | 0.24487678075200 | T | T | T |
| 0.75023368701700 | 0.68940583187500 | 0.24481355789700 | T | T | T |
| 0.76348724062500 | 0.34702435246400 | 0.24443247580100 | T | T | T |
| 0.37388488935000 | 0.09436121521090 | 0.99539922344300 | T | T | T |
| 0.36964071769300 | 0.75580334322700 | 0.99869205331300 | T | T | T |
| 0.37636063218500 | 0.42530856720900 | 0.99518580582600 | T | T | T |
| 0.87596426705600 | 0.09151128545230 | 0.99574282985100 | T | T | T |
| 0.87288973338300 | 0.76071454936600 | 0.99513419032300 | T | T | T |
| 0.87882174077300 | 0.42374525423200 | 0.99572490547800 | T | T | T |
| 0.12593862375500 | 0.09260400535800 | 0.99544291204100 | T | T | T |
| 0.12201889566800 | 0.75854558858000 | 0.99499469607900 | T | T | T |
| 0.12379199104600 | 0.42656110057700 | 0.99523974600800 | T | T | T |
| 0.62522343458700 | 0.09310229524140 | 0.99535168870800 | T | T | T |
| 0.61973783609100 | 0.75379636104300 | 0.99738614911900 | T | T | T |
| 0.62729426806500 | 0.40653380333600 | 0.00628123722132 | T | T | T |
| 0.00191533230286 | 0.24722225761800 | 0.06675966711320 | T | T | T |

|                  |                  |                  |   |   |   |
|------------------|------------------|------------------|---|---|---|
| 0.00071421690185 | 0.91502370732600 | 0.06632490799510 | T | T | T |
| 0.99939484690200 | 0.58227197540500 | 0.06628986798000 | T | T | T |
| 0.50104605955400 | 0.25655437490600 | 0.06307406464510 | T | T | T |
| 0.49924523038600 | 0.91664853646600 | 0.06569844911760 | T | T | T |
| 0.49723695832800 | 0.58023095715000 | 0.06812450924350 | T | T | T |
| 0.25296367048300 | 0.25020435055400 | 0.06572709257950 | T | T | T |
| 0.24911321672600 | 0.91462668817300 | 0.06641905464260 | T | T | T |
| 0.25060408043100 | 0.57981077237400 | 0.06710241222100 | T | T | T |
| 0.75008576046400 | 0.24340128105000 | 0.06854417263600 | T | T | T |
| 0.74987028286900 | 0.91486566880000 | 0.06620636455880 | T | T | T |
| 0.75067384040100 | 0.58218151305600 | 0.06623595820040 | T | T | T |
| 0.12500000002200 | 0.08332999798400 | 0.13043999673400 | F | F | F |
| 0.12500000002200 | 0.74999999984900 | 0.13043999673400 | F | F | F |
| 0.12500000002200 | 0.41666999457100 | 0.13043999673400 | F | F | F |
| 0.62499999998400 | 0.08332999798400 | 0.13043999673400 | F | F | F |
| 0.62499999998400 | 0.74999999984900 | 0.13043999673400 | F | F | F |
| 0.62499999998400 | 0.41666999457100 | 0.13043999673400 | F | F | F |
| 0.37500000000400 | 0.08332999798400 | 0.13043999673400 | F | F | F |
| 0.37500000000400 | 0.74999999984900 | 0.13043999673400 | F | F | F |
| 0.37500000000400 | 0.41666999457100 | 0.13043999673400 | F | F | F |
| 0.87500000009500 | 0.08332999798400 | 0.13043999673400 | F | F | F |
| 0.87500000009500 | 0.74999999984900 | 0.13043999673400 | F | F | F |
| 0.87500000009500 | 0.41666999457100 | 0.13043999673400 | F | F | F |
| 0.00167117976541 | 0.24732257920400 | 0.19406111813200 | T | T | T |
| 0.00073594003830 | 0.91501498260600 | 0.19442668792800 | T | T | T |
| 0.99946742406200 | 0.58201618371400 | 0.19445463086200 | T | T | T |
| 0.50036598118800 | 0.25627876675500 | 0.19740897281400 | T | T | T |
| 0.49932967428600 | 0.91659207458200 | 0.19516050199500 | T | T | T |
| 0.49838891085400 | 0.57899083809300 | 0.19336287682800 | T | T | T |
| 0.25100543622100 | 0.25215929567600 | 0.19575875884200 | T | T | T |



|                  |                  |                  |   |   |   |
|------------------|------------------|------------------|---|---|---|
| 0.24937609481900 | 0.91445420328600 | 0.19441898748700 | T | T | T |
| 0.25090168588700 | 0.57940545677800 | 0.19390036345300 | T | T | T |
| 0.74983659408000 | 0.24451125254500 | 0.19301154707500 | T | T | T |
| 0.74990727036500 | 0.91482099141500 | 0.19455174350800 | T | T | T |
| 0.74989130967600 | 0.58114921781000 | 0.19474434651200 | T | T | T |
| 0.37332178042500 | 0.09526204815110 | 0.26484695387400 | T | T | T |
| 0.37130151868300 | 0.75451339751800 | 0.26200948695000 | T | T | T |
| 0.37757483122000 | 0.42355591523700 | 0.26718980447900 | T | T | T |
| 0.87587077606000 | 0.09163538315350 | 0.26485942929800 | T | T | T |
| 0.87322866344900 | 0.76054030551100 | 0.26538498257100 | T | T | T |
| 0.87947018594700 | 0.42441996514800 | 0.26543671447100 | T | T | T |
| 0.12576080884500 | 0.09261512029320 | 0.26520959983800 | T | T | T |
| 0.12237470599800 | 0.75857609470300 | 0.26558976951000 | T | T | T |
| 0.12308911681500 | 0.42747785470900 | 0.26596359952800 | T | T | T |
| 0.62498760365300 | 0.09322980968190 | 0.26528843243700 | T | T | T |
| 0.62147931655200 | 0.75465355127400 | 0.26425453221200 | T | T | T |
| 0.62708092275800 | 0.40379710938800 | 0.25715565519700 | T | T | T |
| 0.57039710948000 | 0.68749565480000 | 0.37788134880300 | T | T | T |
| 0.67142775253600 | 0.72544310001100 | 0.33908390544700 | T | T | T |
| 0.48754025412300 | 0.74602546520100 | 0.36248296638800 | T | T | T |
| 0.48845814244900 | 0.64418614646600 | 0.35321691821100 | T | T | T |
| 0.52806779568400 | 0.82285258165500 | 0.32296492918200 | T | T | T |
| 0.42880015656400 | 0.80883978775200 | 0.31996435382400 | T | T | T |
| 0.69838067770800 | 0.74473906607100 | 0.38790461560100 | T | T | T |
| 0.43699039868700 | 0.54923179504700 | 0.30001989077500 | T | T | T |
| 0.53947105712300 | 0.56197974567100 | 0.30771145498900 | T | T | T |
| 0.57079888066300 | 0.69154690186800 | 0.88583644656300 | T | T | T |
| 0.67010453251700 | 0.72943146383500 | 0.92465255392800 | T | T | T |
| 0.48902661904300 | 0.75132373043200 | 0.90155313868100 | T | T | T |
| 0.48748165994800 | 0.64827327703500 | 0.90953775838600 | T | T | T |

|                  |                  |                  |   |   |   |
|------------------|------------------|------------------|---|---|---|
| 0.53114229309600 | 0.82459074108900 | 0.94179717328800 | T | T | T |
| 0.43103506496000 | 0.81411302937600 | 0.94314849068100 | T | T | T |
| 0.69760503263200 | 0.74992523274300 | 0.87599093914900 | T | T | T |
| 0.43435882152100 | 0.54920043815800 | 0.96265941891000 | T | T | T |
| 0.53706543965300 | 0.56289088218700 | 0.95512590011300 | T | T | T |
| 0.71273228379800 | 0.45570560646300 | 0.36112386718300 | T | T | T |
| 0.71233680176700 | 0.46041782659700 | 0.90250172265400 | T | T | T |
| 0.66862635689300 | 0.70469552115300 | 0.36981196875600 | T | T | T |
| 0.50430588993400 | 0.68542786881300 | 0.37670502581800 | T | T | T |
| 0.47685181195700 | 0.81791242648100 | 0.34222075323200 | T | T | T |
| 0.48145003275200 | 0.59189890201900 | 0.30649659981200 | T | T | T |
| 0.66856415012700 | 0.70893825715600 | 0.89376271008700 | T | T | T |
| 0.50456041656800 | 0.69033320713200 | 0.88691613777100 | T | T | T |
| 0.48055054448700 | 0.82282702925700 | 0.92176076707900 | T | T | T |
| 0.47861652730300 | 0.59223603677400 | 0.95610243541000 | T | T | T |
| 0.62884975833000 | 0.53073042618200 | 0.31746408859500 | T | T | T |
| 0.70471242530100 | 0.42063530538900 | 0.33514780603200 | T | T | T |
| 0.62742705784600 | 0.53375426691600 | 0.94636927249000 | T | T | T |
| 0.70461445048200 | 0.42474805023800 | 0.92825895277700 | T | T | T |
| 0.65467431080200 | 0.46212061457300 | 0.30662554063700 | T | T | T |
| 0.65420296419800 | 0.46524729045300 | 0.95696582980200 | T | T | T |

## 2) Small supercell 1-H<sup>+</sup><sub>sol</sub> FS

POSCAR

1

|                   |                   |                   |
|-------------------|-------------------|-------------------|
| 15.60575999998655 | 0.00000000000000  | 0.00000000000000  |
| 0.00000000000000  | 16.55240999999278 | 0.00000000000000  |
| 0.00000000000000  | 0.00000000000000  | 30.38812199999634 |

Ga P H O C

60 60 20 12 2

Direct

|                  |                  |                  |   |   |   |
|------------------|------------------|------------------|---|---|---|
| 0.00143208970914 | 0.02208369979060 | 0.01567004037430 | T | T | T |
| 0.00177452716069 | 0.69009889236100 | 0.01559159413520 | T | T | T |
| 0.00228113621058 | 0.35797757995300 | 0.01534797217910 | T | T | T |
| 0.50157778509800 | 0.02180655686340 | 0.01568807829780 | T | T | T |
| 0.50210352184500 | 0.67686160014900 | 0.00842661591922 | T | T | T |
| 0.49826469870700 | 0.35432661709900 | 0.01536737834500 | T | T | T |
| 0.25041801570600 | 0.02210168446550 | 0.01580487869100 | T | T | T |
| 0.24990636751800 | 0.69023657250000 | 0.01559926744390 | T | T | T |
| 0.24996417490000 | 0.35430193091300 | 0.01552532910710 | T | T | T |
| 0.75051113520900 | 0.02174290201070 | 0.01591898594060 | T | T | T |
| 0.75031495349900 | 0.67860319542000 | 0.01162454810360 | T | T | T |
| 0.75006625922800 | 0.35349532921000 | 0.01580750240830 | T | T | T |
| 0.37572819995900 | 0.16436641388900 | 0.06421065634900 | T | T | T |
| 0.37602636040500 | 0.82990507212300 | 0.06427021183550 | T | T | T |
| 0.37634347107500 | 0.49803458731800 | 0.06447942253300 | T | T | T |
| 0.87606645526700 | 0.16462804130700 | 0.06420187282790 | T | T | T |
| 0.87503236105600 | 0.82912433492500 | 0.06387783262100 | T | T | T |
| 0.87523835362900 | 0.49804751524100 | 0.06468243087460 | T | T | T |
| 0.12409819870800 | 0.16503473201300 | 0.06422153917950 | T | T | T |
| 0.12438559460600 | 0.83283619373700 | 0.06447247818270 | T | T | T |
| 0.12476472789300 | 0.49791666842800 | 0.06437478912070 | T | T | T |
| 0.62447296601900 | 0.16455712748500 | 0.06423726735350 | T | T | T |
| 0.62461202852300 | 0.82908027581600 | 0.06424348552170 | T | T | T |
| 0.62378815610900 | 0.49760758032100 | 0.06477690382160 | T | T | T |
| 0.00000000000000 | 0.00000000000000 | 0.13043999673400 | F | F | F |
| 0.00000000000000 | 0.66667002414000 | 0.13043999673400 | F | F | F |
| 0.00000000000000 | 0.33333000540000 | 0.13043999673400 | F | F | F |
| 0.50000000002500 | 0.00000000000000 | 0.13043999673400 | F | F | F |
| 0.50000000002500 | 0.66667002414000 | 0.13043999673400 | F | F | F |

|                  |                  |                  |   |   |   |
|------------------|------------------|------------------|---|---|---|
| 0.5000000002500  | 0.33333000540000 | 0.13043999673400 | F | F | F |
| 0.2499999998000  | 0.00000000000000 | 0.13043999673400 | F | F | F |
| 0.2499999998000  | 0.66667002414000 | 0.13043999673400 | F | F | F |
| 0.2499999998000  | 0.33333000540000 | 0.13043999673400 | F | F | F |
| 0.75000000026600 | 0.00000000000000 | 0.13043999673400 | F | F | F |
| 0.75000000026600 | 0.66667002414000 | 0.13043999673400 | F | F | F |
| 0.75000000026600 | 0.33333000540000 | 0.13043999673400 | F | F | F |
| 0.37569148187400 | 0.16445374724900 | 0.19651683722900 | T | T | T |
| 0.37616225828100 | 0.82940288778300 | 0.19665579030700 | T | T | T |
| 0.37659876447800 | 0.49852619638700 | 0.19627019275500 | T | T | T |
| 0.87603543011300 | 0.16466926597600 | 0.19651649333100 | T | T | T |
| 0.87482891123100 | 0.82891698790900 | 0.19709514466500 | T | T | T |
| 0.87397828411900 | 0.49848659694700 | 0.19612886814600 | T | T | T |
| 0.12404784789600 | 0.16508699781900 | 0.19650485840900 | T | T | T |
| 0.12439000355600 | 0.83286141108900 | 0.19623791601500 | T | T | T |
| 0.12449862258700 | 0.49805389003600 | 0.19634039724800 | T | T | T |
| 0.62441611458300 | 0.16462071063700 | 0.19646636511500 | T | T | T |
| 0.62458301756700 | 0.82866706658100 | 0.19676162559200 | T | T | T |
| 0.62369907076400 | 0.49816796974800 | 0.19610351929900 | T | T | T |
| 0.00140857185153 | 0.02212677892500 | 0.24498119551900 | T | T | T |
| 0.00177028953257 | 0.69014252217300 | 0.24509813808800 | T | T | T |
| 0.00195286601195 | 0.35821725548200 | 0.24535899013100 | T | T | T |
| 0.50156785390100 | 0.02185972587960 | 0.24492332650000 | T | T | T |
| 0.50222886255900 | 0.67694540488100 | 0.25468000049800 | T | T | T |
| 0.49835545166900 | 0.35454852290000 | 0.24536330562100 | T | T | T |
| 0.25041961851200 | 0.02211309343520 | 0.24483757893700 | T | T | T |
| 0.24998368992300 | 0.69029855991300 | 0.24516039623000 | T | T | T |
| 0.24992502575900 | 0.35460214078600 | 0.24514622344400 | T | T | T |
| 0.75049422665100 | 0.02178689303000 | 0.24474549986300 | T | T | T |
| 0.75021782957800 | 0.67890763955300 | 0.25162259627500 | T | T | T |

|                  |                  |                  |   |   |   |
|------------------|------------------|------------------|---|---|---|
| 0.74994162992900 | 0.35365421978600 | 0.24490905972700 | T | T | T |
| 0.37596947661100 | 0.09186240134860 | 0.99580157299400 | T | T | T |
| 0.37637257635600 | 0.75703542525900 | 0.99703095777600 | T | T | T |
| 0.37491747120900 | 0.42541434845300 | 0.99543906246500 | T | T | T |
| 0.87586018022000 | 0.09191537195800 | 0.99580583048300 | T | T | T |
| 0.87489691688900 | 0.75582334094800 | 0.99558934107400 | T | T | T |
| 0.87419727592200 | 0.42555043586300 | 0.99592975801000 | T | T | T |
| 0.12565900871200 | 0.09265260025390 | 0.99563146478400 | T | T | T |
| 0.12555945108900 | 0.76057030221700 | 0.99571401690400 | T | T | T |
| 0.12663147630800 | 0.42681249251900 | 0.99514080766500 | T | T | T |
| 0.62586304340100 | 0.09248415037080 | 0.99566060131600 | T | T | T |
| 0.62650772619000 | 0.75627559613000 | 0.99747901028900 | T | T | T |
| 0.62532706616000 | 0.42364611514800 | 0.99624484113800 | T | T | T |
| 0.99985992501000 | 0.24987503520100 | 0.06605503249370 | T | T | T |
| 0.99913146855800 | 0.91482349733000 | 0.06648222256080 | T | T | T |
| 0.00035272785662 | 0.58167687539500 | 0.06622620713090 | T | T | T |
| 0.50006378188000 | 0.24840016520800 | 0.06659953700040 | T | T | T |
| 0.50059281191400 | 0.91439147415200 | 0.06652530558190 | T | T | T |
| 0.50019932605200 | 0.58201135040400 | 0.06691003289750 | T | T | T |
| 0.25018816246100 | 0.24788997864900 | 0.06659744087650 | T | T | T |
| 0.25063947659900 | 0.91478019141400 | 0.06662090157700 | T | T | T |
| 0.25024478883300 | 0.58154007897100 | 0.06617073717920 | T | T | T |
| 0.75029645948900 | 0.24746323205200 | 0.06678766889290 | T | T | T |
| 0.74990682941100 | 0.91395607012000 | 0.06655746439230 | T | T | T |
| 0.74965704796300 | 0.58039519467000 | 0.06787777575420 | T | T | T |
| 0.12500000002200 | 0.08332999798400 | 0.13043999673400 | F | F | F |
| 0.12500000002200 | 0.74999999984900 | 0.13043999673400 | F | F | F |
| 0.12500000002200 | 0.41666999457100 | 0.13043999673400 | F | F | F |
| 0.62499999998400 | 0.08332999798400 | 0.13043999673400 | F | F | F |
| 0.62499999998400 | 0.74999999984900 | 0.13043999673400 | F | F | F |

|                  |                  |                  |   |   |   |
|------------------|------------------|------------------|---|---|---|
| 0.6249999998400  | 0.41666999457100 | 0.13043999673400 | F | F | F |
| 0.3750000000400  | 0.08332999798400 | 0.13043999673400 | F | F | F |
| 0.3750000000400  | 0.7499999984900  | 0.13043999673400 | F | F | F |
| 0.3750000000400  | 0.41666999457100 | 0.13043999673400 | F | F | F |
| 0.8750000009500  | 0.08332999798400 | 0.13043999673400 | F | F | F |
| 0.8750000009500  | 0.7499999984900  | 0.13043999673400 | F | F | F |
| 0.8750000009500  | 0.41666999457100 | 0.13043999673400 | F | F | F |
| 0.99978909243300 | 0.24988165963400 | 0.19481433139500 | T | T | T |
| 0.99901441607900 | 0.91466548716600 | 0.19438188524100 | T | T | T |
| 0.99980363414100 | 0.58159326183600 | 0.19460949902600 | T | T | T |
| 0.50000431691700 | 0.24842002807600 | 0.19428331105200 | T | T | T |
| 0.50060657660000 | 0.91410296990100 | 0.19438070182100 | T | T | T |
| 0.50023280005300 | 0.58320216997800 | 0.19489319860500 | T | T | T |
| 0.25011641014400 | 0.24791196524500 | 0.19429177427500 | T | T | T |
| 0.25078564099500 | 0.91455479860700 | 0.19423994800900 | T | T | T |
| 0.25013844852100 | 0.58155620915300 | 0.19466175004100 | T | T | T |
| 0.75025770887600 | 0.24747311012600 | 0.19407329974300 | T | T | T |
| 0.74979682975800 | 0.91374670560600 | 0.19434790890700 | T | T | T |
| 0.74919651891300 | 0.58187136726000 | 0.19417766858700 | T | T | T |
| 0.37596473619800 | 0.09181405472590 | 0.26496611107900 | T | T | T |
| 0.37601526927300 | 0.75735234512300 | 0.26453862339700 | T | T | T |
| 0.37488851693500 | 0.42551999080000 | 0.26531007447700 | T | T | T |
| 0.87583154714300 | 0.09190381044150 | 0.26496198505200 | T | T | T |
| 0.87555296803800 | 0.75637317220300 | 0.26581841629600 | T | T | T |
| 0.87390511857900 | 0.42573146915700 | 0.26494222663400 | T | T | T |
| 0.12565586838900 | 0.09259685850210 | 0.26513112897900 | T | T | T |
| 0.12555477132600 | 0.76058575552700 | 0.26502855455700 | T | T | T |
| 0.12640901167900 | 0.42687819650900 | 0.26562030732600 | T | T | T |
| 0.62583613580800 | 0.09247473809910 | 0.26509152181200 | T | T | T |
| 0.62630307420000 | 0.75745082937200 | 0.26454341105500 | T | T | T |

|                  |                  |                  |   |   |   |
|------------------|------------------|------------------|---|---|---|
| 0.62528169351300 | 0.42376172913400 | 0.26470397109400 | T | T | T |
| 0.58976032853200 | 0.67486324445200 | 0.38484754121900 | T | T | T |
| 0.71979385961000 | 0.63671763569600 | 0.36378775422200 | T | T | T |
| 0.51513292177700 | 0.73665856714500 | 0.36982668266600 | T | T | T |
| 0.51485851121600 | 0.63671262428900 | 0.34111342527300 | T | T | T |
| 0.54900103857300 | 0.82367050664400 | 0.32414464942500 | T | T | T |
| 0.44991260081800 | 0.82217051270900 | 0.32857460369600 | T | T | T |
| 0.72980208773500 | 0.71372607705200 | 0.39320245353200 | T | T | T |
| 0.46455487720000 | 0.56215238784000 | 0.30951719928500 | T | T | T |
| 0.79190770060500 | 0.54632740776700 | 0.30415976673600 | T | T | T |
| 0.58915456262000 | 0.67925712726100 | 0.88087251808400 | T | T | T |
| 0.71714095882800 | 0.63576528799500 | 0.90301417025400 | T | T | T |
| 0.51444879626900 | 0.74142870160400 | 0.89509548848800 | T | T | T |
| 0.51256361749100 | 0.63883812035600 | 0.92269507941900 | T | T | T |
| 0.54988889678600 | 0.82751170750600 | 0.94052079735000 | T | T | T |
| 0.45073604970500 | 0.82663925593600 | 0.93648333825100 | T | T | T |
| 0.72853529324600 | 0.71754472396400 | 0.87818906497600 | T | T | T |
| 0.46204639545100 | 0.56305862773400 | 0.95327258167300 | T | T | T |
| 0.79246368974700 | 0.54526965484800 | 0.95950407441500 | T | T | T |
| 0.69204795846500 | 0.54855912007100 | 0.30153625901600 | T | T | T |
| 0.69249834406200 | 0.54609028927700 | 0.96271389147700 | T | T | T |
| 0.69684650592200 | 0.66382907487000 | 0.39023599665900 | T | T | T |
| 0.52697216927300 | 0.67805809540300 | 0.37739304520700 | T | T | T |
| 0.50266647616100 | 0.82751297020000 | 0.34642883572400 | T | T | T |
| 0.50899756794700 | 0.60410808471000 | 0.30828295632300 | T | T | T |
| 0.69633134362300 | 0.66694771429400 | 0.87739923669100 | T | T | T |
| 0.52586295926800 | 0.68300593591200 | 0.88712395748600 | T | T | T |
| 0.50324117440800 | 0.83343907206800 | 0.91853475457200 | T | T | T |
| 0.50749621810100 | 0.60403326156800 | 0.95464415407600 | T | T | T |
| 0.74261141466500 | 0.58399427012900 | 0.30732889630700 | T | T | T |

|                  |                  |                  |   |   |   |
|------------------|------------------|------------------|---|---|---|
| 0.74248810666200 | 0.58231034195000 | 0.95667848526400 | T | T | T |
| 0.61627518587100 | 0.49043656888400 | 0.45413088269600 | T | T | T |
| 0.61591806728800 | 0.49027237573200 | 0.81387770394000 | T | T | T |
| 0.63772071103100 | 0.48718673512300 | 0.41809329019000 | T | T | T |
| 0.63459785979000 | 0.48933419456800 | 0.85035115835200 | T | T | T |

### 3) Small supercell 2-H<sup>+</sup><sub>sol</sub> IS

POSCAR

1

|                   |                   |                   |
|-------------------|-------------------|-------------------|
| 15.60575999998655 | 0.00000000000000  | 0.00000000000000  |
| 0.00000000000000  | 16.55240999999278 | 0.00000000000000  |
| 0.00000000000000  | 0.00000000000000  | 30.38812199999634 |

Ga P H O C

60 60 38 20 2

Direct

|                  |                  |                  |   |   |   |
|------------------|------------------|------------------|---|---|---|
| 0.00186046794668 | 0.02700122208040 | 0.01606217410470 | T | T | T |
| 0.99636370260200 | 0.67811965486100 | 0.01501161089000 | T | T | T |
| 0.00355953554742 | 0.35293484299900 | 0.01689865322740 | T | T | T |
| 0.49907783294100 | 0.02719485386140 | 0.01577772034220 | T | T | T |
| 0.49116504537400 | 0.67708031257000 | 0.01214258964760 | T | T | T |
| 0.48982184728100 | 0.30874642996500 | 0.98090644472000 | T | T | T |
| 0.25067775233200 | 0.02706827872320 | 0.01594285597510 | T | T | T |
| 0.24439881851800 | 0.68499159441400 | 0.01892584033310 | T | T | T |
| 0.25548950810300 | 0.36433553919700 | 0.01520278415750 | T | T | T |
| 0.74959492089900 | 0.02278272393820 | 0.01590731949350 | T | T | T |
| 0.74407380335800 | 0.68923063354000 | 0.01603970523620 | T | T | T |
| 0.76228130070700 | 0.34766815489100 | 0.01885873101860 | T | T | T |
| 0.38177234923500 | 0.16729134458200 | 0.06452268640030 | T | T | T |
| 0.37489109600300 | 0.83313130709500 | 0.06476328651930 | T | T | T |
| 0.37640457501200 | 0.49096393017000 | 0.06375423009940 | T | T | T |



|                  |                  |                  |   |   |   |
|------------------|------------------|------------------|---|---|---|
| 0.87671440234200 | 0.16046353989700 | 0.06403972546450 | T | T | T |
| 0.87571097073700 | 0.82965391321200 | 0.06413964438920 | T | T | T |
| 0.87542009012300 | 0.49624630084500 | 0.06454348989830 | T | T | T |
| 0.12950758490400 | 0.16566381123800 | 0.06416900014580 | T | T | T |
| 0.12397546438600 | 0.83335517397600 | 0.06443954517510 | T | T | T |
| 0.12425465662900 | 0.49644347016300 | 0.06470910076410 | T | T | T |
| 0.61750058223500 | 0.16542921291200 | 0.06426720697340 | T | T | T |
| 0.62352868520000 | 0.83284939127800 | 0.06426752906290 | T | T | T |
| 0.62382596507800 | 0.50137170862900 | 0.06665252268740 | T | T | T |
| 0.00000000000000 | 0.00000000000000 | 0.13043999673400 | F | F | F |
| 0.00000000000000 | 0.66667002414000 | 0.13043999673400 | F | F | F |
| 0.00000000000000 | 0.33333000540000 | 0.13043999673400 | F | F | F |
| 0.50000000002500 | 0.00000000000000 | 0.13043999673400 | F | F | F |
| 0.50000000002500 | 0.66667002414000 | 0.13043999673400 | F | F | F |
| 0.50000000002500 | 0.33333000540000 | 0.13043999673400 | F | F | F |
| 0.24999999998000 | 0.00000000000000 | 0.13043999673400 | F | F | F |
| 0.24999999998000 | 0.66667002414000 | 0.13043999673400 | F | F | F |
| 0.24999999998000 | 0.33333000540000 | 0.13043999673400 | F | F | F |
| 0.75000000026600 | 0.00000000000000 | 0.13043999673400 | F | F | F |
| 0.75000000026600 | 0.66667002414000 | 0.13043999673400 | F | F | F |
| 0.75000000026600 | 0.33333000540000 | 0.13043999673400 | F | F | F |
| 0.37821662644000 | 0.17031318371800 | 0.19588109096100 | T | T | T |
| 0.37528710261300 | 0.83304436360100 | 0.19587408755800 | T | T | T |
| 0.37642449057500 | 0.49049604685700 | 0.19854721721600 | T | T | T |
| 0.87656000018600 | 0.16374889268200 | 0.19628544453700 | T | T | T |
| 0.87569849133700 | 0.83244430775300 | 0.19631971529400 | T | T | T |
| 0.87614393047700 | 0.49617464542500 | 0.19607859047900 | T | T | T |
| 0.12931955353500 | 0.16562544485500 | 0.19643615245200 | T | T | T |
| 0.12427457949200 | 0.83291753052800 | 0.19628501680200 | T | T | T |
| 0.12452140979400 | 0.49684228532700 | 0.19603400450000 | T | T | T |

|                  |                  |                  |   |   |   |
|------------------|------------------|------------------|---|---|---|
| 0.61720456400300 | 0.16564579743600 | 0.19625172169800 | T | T | T |
| 0.62406875245900 | 0.83292543081900 | 0.19644605141900 | T | T | T |
| 0.62372265262300 | 0.49744249166100 | 0.19591384273100 | T | T | T |
| 0.00168828038582 | 0.02754511621600 | 0.24449057175100 | T | T | T |
| 0.99772812780900 | 0.67776726933000 | 0.24772280063000 | T | T | T |
| 0.00368611563253 | 0.35315625001900 | 0.24435859211500 | T | T | T |
| 0.49810890094200 | 0.02761396522810 | 0.24465666305000 | T | T | T |
| 0.49625206752200 | 0.67691568193300 | 0.24847500916900 | T | T | T |
| 0.48946722416800 | 0.30331825052700 | 0.27974983550000 | T | T | T |
| 0.25051785517000 | 0.02711347722480 | 0.24460836882900 | T | T | T |
| 0.24901631928000 | 0.68442575358900 | 0.24414509148800 | T | T | T |
| 0.25538277207700 | 0.36459026220000 | 0.24805039206900 | T | T | T |
| 0.74948150052900 | 0.02687673631190 | 0.24454811233500 | T | T | T |
| 0.74870465798900 | 0.68539558729800 | 0.24469686153000 | T | T | T |
| 0.76254065850600 | 0.34725719560400 | 0.24422899859900 | T | T | T |
| 0.37514035471400 | 0.09531462422340 | 0.99481222933900 | T | T | T |
| 0.36842230280000 | 0.75528656501300 | 0.99841975836000 | T | T | T |
| 0.37940981505900 | 0.42801431709500 | 0.99450949980500 | T | T | T |
| 0.87477890072000 | 0.09153180594540 | 0.99468659080300 | T | T | T |
| 0.87250624667800 | 0.75253806187500 | 0.99641525983300 | T | T | T |
| 0.87959334946600 | 0.42249743683600 | 0.99596095920600 | T | T | T |
| 0.12603706904500 | 0.09484740700100 | 0.99473070075400 | T | T | T |
| 0.11997054753700 | 0.75318265435500 | 0.99669504701600 | T | T | T |
| 0.12376156583500 | 0.42579224203600 | 0.99566697497500 | T | T | T |
| 0.62549489645800 | 0.09255623648520 | 0.99498180275700 | T | T | T |
| 0.61702411422600 | 0.75455603612100 | 0.99605789246000 | T | T | T |
| 0.62699060685000 | 0.40601689944300 | 0.00576440504808 | T | T | T |
| 0.00125830699990 | 0.24620071729300 | 0.06715200475490 | T | T | T |
| 0.99923380560600 | 0.91602145014900 | 0.06565732351750 | T | T | T |
| 0.99931619620500 | 0.57920540054600 | 0.06875882638470 | T | T | T |

|                  |                  |                  |   |   |   |
|------------------|------------------|------------------|---|---|---|
| 0.50112337735800 | 0.25657666255300 | 0.06314739703080 | T | T | T |
| 0.49928773305100 | 0.91660323890700 | 0.06571846521260 | T | T | T |
| 0.49737886530800 | 0.58057155537400 | 0.06802894406000 | T | T | T |
| 0.25312040152000 | 0.25210852435500 | 0.06530850099120 | T | T | T |
| 0.24946752456600 | 0.91620873594800 | 0.06571410523320 | T | T | T |
| 0.25006393871800 | 0.57841904501800 | 0.06822922919560 | T | T | T |
| 0.75098143835500 | 0.24299441315700 | 0.06860770172830 | T | T | T |
| 0.75052528058600 | 0.91356495862600 | 0.06600784793520 | T | T | T |
| 0.75031713133000 | 0.58170814473600 | 0.06641581976650 | T | T | T |
| 0.12500000002200 | 0.08332999798400 | 0.13043999673400 | F | F | F |
| 0.12500000002200 | 0.74999999984900 | 0.13043999673400 | F | F | F |
| 0.12500000002200 | 0.41666999457100 | 0.13043999673400 | F | F | F |
| 0.62499999998400 | 0.08332999798400 | 0.13043999673400 | F | F | F |
| 0.62499999998400 | 0.74999999984900 | 0.13043999673400 | F | F | F |
| 0.62499999998400 | 0.41666999457100 | 0.13043999673400 | F | F | F |
| 0.37500000000400 | 0.08332999798400 | 0.13043999673400 | F | F | F |
| 0.37500000000400 | 0.74999999984900 | 0.13043999673400 | F | F | F |
| 0.37500000000400 | 0.41666999457100 | 0.13043999673400 | F | F | F |
| 0.87500000009500 | 0.08332999798400 | 0.13043999673400 | F | F | F |
| 0.87500000009500 | 0.74999999984900 | 0.13043999673400 | F | F | F |
| 0.87500000009500 | 0.41666999457100 | 0.13043999673400 | F | F | F |
| 0.00174267732700 | 0.24716097360200 | 0.19372730812800 | T | T | T |
| 0.00003174288632 | 0.91633206650700 | 0.19527271783900 | T | T | T |
| 0.99973774649800 | 0.58008219254400 | 0.19277348428000 | T | T | T |
| 0.50043047460200 | 0.25649891941200 | 0.19724943501100 | T | T | T |
| 0.49959093502800 | 0.91638698229500 | 0.19516199866900 | T | T | T |
| 0.49854283241400 | 0.57923676623600 | 0.19323093971500 | T | T | T |
| 0.25114294706500 | 0.25412563139100 | 0.19625374183300 | T | T | T |
| 0.24970013482400 | 0.91594342496400 | 0.19512832311400 | T | T | T |
| 0.25086884575200 | 0.57895860889200 | 0.19356258544900 | T | T | T |

|                  |                  |                  |   |   |   |
|------------------|------------------|------------------|---|---|---|
| 0.75024308519000 | 0.24473283664900 | 0.19289569519100 | T | T | T |
| 0.75021365848400 | 0.91532863337000 | 0.19523852558400 | T | T | T |
| 0.75026284661700 | 0.57924981765600 | 0.19409556319900 | T | T | T |
| 0.37442578095000 | 0.09636063600680 | 0.26531844278000 | T | T | T |
| 0.37299919024500 | 0.75546041659300 | 0.26252613458900 | T | T | T |
| 0.38088398057200 | 0.42628696283500 | 0.26764199897600 | T | T | T |
| 0.87541234184100 | 0.09393408105770 | 0.26551407547200 | T | T | T |
| 0.87409608572500 | 0.75351318448100 | 0.26413288356700 | T | T | T |
| 0.88010450814700 | 0.42329468837600 | 0.26523646978500 | T | T | T |
| 0.12595105024100 | 0.09501323174700 | 0.26586959760200 | T | T | T |
| 0.12272980484000 | 0.75312126331500 | 0.26446714689600 | T | T | T |
| 0.12332495761700 | 0.42689165392500 | 0.26556170116400 | T | T | T |
| 0.62414660634300 | 0.09394323002780 | 0.26575437959600 | T | T | T |
| 0.62214863595700 | 0.75316824416300 | 0.26456105815200 | T | T | T |
| 0.62661547873900 | 0.40354583277000 | 0.25720785771400 | T | T | T |
| 0.56798324770600 | 0.68343034981200 | 0.37736279686200 | T | T | T |
| 0.66745761257400 | 0.72085081837800 | 0.33810929668800 | T | T | T |
| 0.48699727954900 | 0.74287898020000 | 0.36219782700400 | T | T | T |
| 0.48561837125500 | 0.64130272044500 | 0.35212790805600 | T | T | T |
| 0.53035328593500 | 0.82050922852100 | 0.32354755797100 | T | T | T |
| 0.43112683529100 | 0.80816315005100 | 0.31974588254800 | T | T | T |
| 0.69081272521400 | 0.74633810628200 | 0.38652431167200 | T | T | T |
| 0.43401626459500 | 0.54759231454300 | 0.29941276779400 | T | T | T |
| 0.53621068481900 | 0.56034825286100 | 0.30768198220400 | T | T | T |
| 0.56495092180700 | 0.68621566931600 | 0.88545459407400 | T | T | T |
| 0.66450673556400 | 0.72410267998900 | 0.92375031854100 | T | T | T |
| 0.48328727497500 | 0.74535719998500 | 0.90013454053200 | T | T | T |
| 0.48285136844400 | 0.64346315852900 | 0.91095832967800 | T | T | T |
| 0.52544875763200 | 0.82596452578500 | 0.93764586633400 | T | T | T |
| 0.42660518964000 | 0.81203594244800 | 0.94147367358400 | T | T | T |

|                  |                  |                  |   |   |   |
|------------------|------------------|------------------|---|---|---|
| 0.68682586821400 | 0.74949856957200 | 0.87517648684300 | T | T | T |
| 0.43211050907200 | 0.54723979904600 | 0.96267781215100 | T | T | T |
| 0.53460487074000 | 0.56005100207000 | 0.95403860803100 | T | T | T |
| 0.08967182823730 | 0.66647715014400 | 0.37494310945100 | T | T | T |
| 0.18057863588800 | 0.71727425738700 | 0.33414727346000 | T | T | T |
| 0.00191216842621 | 0.71904859356800 | 0.36305111445800 | T | T | T |
| 0.01145083452490 | 0.61779022989200 | 0.35046926505500 | T | T | T |
| 0.03607513710100 | 0.80502570550300 | 0.32623048237100 | T | T | T |
| 0.93699338817300 | 0.79285251727500 | 0.32537620828900 | T | T | T |
| 0.22030036650200 | 0.72090290923800 | 0.38210775767100 | T | T | T |
| 0.95034736593700 | 0.53109618266300 | 0.30175013934000 | T | T | T |
| 0.05082157943090 | 0.52961659180200 | 0.29876568479400 | T | T | T |
| 0.08899800085920 | 0.66493314055700 | 0.88643747764300 | T | T | T |
| 0.18079424906900 | 0.71312189337700 | 0.92723847909000 | T | T | T |
| 0.00095180228628 | 0.71775901367300 | 0.89773211763900 | T | T | T |
| 0.01056822536580 | 0.61691674297000 | 0.91109085179100 | T | T | T |
| 0.03410771861120 | 0.80547973182200 | 0.93401001377700 | T | T | T |
| 0.93537511781900 | 0.79237907471100 | 0.93514730877200 | T | T | T |
| 0.21988331060400 | 0.71722550536800 | 0.87925158750100 | T | T | T |
| 0.95020548253000 | 0.53023208888800 | 0.95925951011200 | T | T | T |
| 0.05066247193070 | 0.52888278043900 | 0.96210555608200 | T | T | T |
| 0.70773425119200 | 0.45429674370500 | 0.36210839626800 | T | T | T |
| 0.70633922293700 | 0.45260477512900 | 0.89992884454900 | T | T | T |
| 0.66544597281300 | 0.70235897046200 | 0.36940382214700 | T | T | T |
| 0.50175500636400 | 0.68194226332600 | 0.37622812737300 | T | T | T |
| 0.47855177313200 | 0.81623646641600 | 0.34252834982600 | T | T | T |
| 0.47838983383600 | 0.59053347403500 | 0.30641384131300 | T | T | T |
| 0.66263049525200 | 0.70517968092900 | 0.89249629832700 | T | T | T |
| 0.49863663194400 | 0.68444159729600 | 0.88694119300900 | T | T | T |
| 0.47375902466500 | 0.82059974618100 | 0.91869803859100 | T | T | T |

|                  |                  |                  |   |   |   |
|------------------|------------------|------------------|---|---|---|
| 0.47660979659800 | 0.59038154291100 | 0.95578432339300 | T | T | T |
| 0.18405637281400 | 0.68809014210300 | 0.36288718444900 | T | T | T |
| 0.02384567002740 | 0.65943552705200 | 0.37484333742800 | T | T | T |
| 0.98687040814600 | 0.79627677349600 | 0.34663813272600 | T | T | T |
| 0.00140196899203 | 0.56677846755300 | 0.30679899913800 | T | T | T |
| 0.18374141558800 | 0.68425382602000 | 0.89845260720800 | T | T | T |
| 0.02312499452620 | 0.65833376050000 | 0.88646471944100 | T | T | T |
| 0.98496578213100 | 0.79594168629100 | 0.91373793559500 | T | T | T |
| 0.00120364326439 | 0.56588473180800 | 0.95422324999500 | T | T | T |
| 0.62553265497300 | 0.52923265456100 | 0.31802740285200 | T | T | T |
| 0.70309513516700 | 0.42011258177300 | 0.33559279856600 | T | T | T |
| 0.62267759088700 | 0.52810681411400 | 0.94283782231800 | T | T | T |
| 0.70310409203600 | 0.42000821085500 | 0.92708283158200 | T | T | T |
| 0.65279275061100 | 0.46123744543600 | 0.30685912885200 | T | T | T |
| 0.65191836612400 | 0.46147085047300 | 0.95523531980200 | T | T | T |

#### 4) Small supercell 2-H<sup>+</sup><sub>sol</sub> FS

POSCAR

1

|                   |                   |                   |
|-------------------|-------------------|-------------------|
| 15.60575999998655 | 0.00000000000000  | 0.00000000000000  |
| 0.00000000000000  | 16.55240999999278 | 0.00000000000000  |
| 0.00000000000000  | 0.00000000000000  | 30.38812199999634 |

Ga P H O C

60 60 38 20 2

Direct

|                  |                  |                  |   |   |   |
|------------------|------------------|------------------|---|---|---|
| 0.00188404802244 | 0.02288074464370 | 0.01584981557910 | T | T | T |
| 0.99734852527700 | 0.67797289041900 | 0.01518003345370 | T | T | T |
| 0.00170260567527 | 0.35405803046400 | 0.01598309899450 | T | T | T |
| 0.50185563535600 | 0.02245650905500 | 0.01589028097180 | T | T | T |
| 0.49769990770300 | 0.67685788817300 | 0.00861012173650 | T | T | T |

|                  |                  |                  |   |   |   |
|------------------|------------------|------------------|---|---|---|
| 0.49810510685900 | 0.35800056179300 | 0.01582645658250 | T | T | T |
| 0.25080264832200 | 0.02283628757740 | 0.01602371960300 | T | T | T |
| 0.25038961598400 | 0.68957487844300 | 0.01660183161110 | T | T | T |
| 0.25099509050600 | 0.35872828956400 | 0.01583818223390 | T | T | T |
| 0.75038905065100 | 0.02202139971930 | 0.01603526094420 | T | T | T |
| 0.74404219714100 | 0.67797125696200 | 0.01158783363610 | T | T | T |
| 0.74952921286600 | 0.35368985950400 | 0.01605138741110 | T | T | T |
| 0.37585116493800 | 0.16422723753700 | 0.06391506568000 | T | T | T |
| 0.37592283694300 | 0.83000558156400 | 0.06430833329420 | T | T | T |
| 0.37629560344200 | 0.49749847127900 | 0.06455134740830 | T | T | T |
| 0.87580278601900 | 0.16056323115700 | 0.06374741837430 | T | T | T |
| 0.87500531906200 | 0.82907587643900 | 0.06403187497050 | T | T | T |
| 0.87204334317800 | 0.49676274720000 | 0.06490126465470 | T | T | T |
| 0.12480117080400 | 0.16412990457500 | 0.06395099503900 | T | T | T |
| 0.12428213221800 | 0.83314609177900 | 0.06471316633930 | T | T | T |
| 0.12418286184200 | 0.49687842458600 | 0.06471086495180 | T | T | T |
| 0.62438644268200 | 0.16409067342500 | 0.06396451631500 | T | T | T |
| 0.62432964326000 | 0.82892272491800 | 0.06422469002040 | T | T | T |
| 0.62327457709800 | 0.49711135232500 | 0.06476073128330 | T | T | T |
| 0.00000000000000 | 0.00000000000000 | 0.13043999673400 | F | F | F |
| 0.00000000000000 | 0.66667002414000 | 0.13043999673400 | F | F | F |
| 0.00000000000000 | 0.33333000540000 | 0.13043999673400 | F | F | F |
| 0.50000000002500 | 0.00000000000000 | 0.13043999673400 | F | F | F |
| 0.50000000002500 | 0.66667002414000 | 0.13043999673400 | F | F | F |
| 0.50000000002500 | 0.33333000540000 | 0.13043999673400 | F | F | F |
| 0.24999999998000 | 0.00000000000000 | 0.13043999673400 | F | F | F |
| 0.24999999998000 | 0.66667002414000 | 0.13043999673400 | F | F | F |
| 0.24999999998000 | 0.33333000540000 | 0.13043999673400 | F | F | F |
| 0.75000000026600 | 0.00000000000000 | 0.13043999673400 | F | F | F |
| 0.75000000026600 | 0.66667002414000 | 0.13043999673400 | F | F | F |

|                  |                  |                  |   |   |   |
|------------------|------------------|------------------|---|---|---|
| 0.75000000026600 | 0.33333000540000 | 0.13043999673400 | F | F | F |
| 0.37586704350700 | 0.16429917507000 | 0.19681113843200 | T | T | T |
| 0.37602157399400 | 0.82954999545900 | 0.19654272981900 | T | T | T |
| 0.37649503750300 | 0.49790989564800 | 0.19616543995300 | T | T | T |
| 0.87611519468300 | 0.16362307430000 | 0.19678454876200 | T | T | T |
| 0.87489205864300 | 0.82872112602000 | 0.19697100822500 | T | T | T |
| 0.87153823105600 | 0.49749769159600 | 0.19591611141200 | T | T | T |
| 0.12457949689800 | 0.16450418115800 | 0.19677659916100 | T | T | T |
| 0.12420629112300 | 0.83264950416400 | 0.19622448291800 | T | T | T |
| 0.12398912545600 | 0.49749378689000 | 0.19598399478800 | T | T | T |
| 0.62426057866800 | 0.16400133644300 | 0.19675707565800 | T | T | T |
| 0.62433590172500 | 0.82852906855200 | 0.19673597855500 | T | T | T |
| 0.62329292097000 | 0.49765358326800 | 0.19603486740400 | T | T | T |
| 0.00179177102013 | 0.02320651512280 | 0.24465021913600 | T | T | T |
| 0.99756629152800 | 0.67802536290100 | 0.24790741819600 | T | T | T |
| 0.00172406630784 | 0.35822283540200 | 0.24461497017600 | T | T | T |
| 0.50189892897000 | 0.02245646742890 | 0.24467103769900 | T | T | T |
| 0.49767567673500 | 0.67703363453300 | 0.25417066764000 | T | T | T |
| 0.49821722800900 | 0.35831477174300 | 0.24478291082900 | T | T | T |
| 0.25082286887400 | 0.02281723651620 | 0.24456985694000 | T | T | T |
| 0.25035112824800 | 0.68990903528300 | 0.24453298096500 | T | T | T |
| 0.25103021232000 | 0.35888688737300 | 0.24482457820800 | T | T | T |
| 0.75051859024600 | 0.02222220341870 | 0.24451399876600 | T | T | T |
| 0.74397447694000 | 0.67822247870900 | 0.25165714031300 | T | T | T |
| 0.74946027376400 | 0.35418413559900 | 0.24474170073000 | T | T | T |
| 0.37618473786300 | 0.09141835261550 | 0.99541703368600 | T | T | T |
| 0.37395681884600 | 0.75796470095400 | 0.99623180787600 | T | T | T |
| 0.37533233878300 | 0.42826255671300 | 0.99450032972500 | T | T | T |
| 0.87597369766600 | 0.09027687844010 | 0.99486524010700 | T | T | T |
| 0.87262399436600 | 0.75027314442500 | 0.99705672640000 | T | T | T |



|                  |                  |                  |   |   |   |
|------------------|------------------|------------------|---|---|---|
| 0.87537505119600 | 0.42431066986200 | 0.99587576665700 | T | T | T |
| 0.12609604404500 | 0.09198558954180 | 0.99512578758800 | T | T | T |
| 0.12157811932300 | 0.75418723825600 | 0.99757763158900 | T | T | T |
| 0.12408949071900 | 0.42573683138000 | 0.99530113141200 | T | T | T |
| 0.62615757365900 | 0.09198361273140 | 0.99525391731900 | T | T | T |
| 0.62267284329600 | 0.75625709710100 | 0.99693038645700 | T | T | T |
| 0.62585289898300 | 0.42446526710000 | 0.99580005700800 | T | T | T |
| 0.99932177033300 | 0.24750628399200 | 0.06669987826490 | T | T | T |
| 0.99910115153300 | 0.91451168767500 | 0.06626678499170 | T | T | T |
| 0.99853032046500 | 0.57838139367300 | 0.06886195435920 | T | T | T |
| 0.50014933505400 | 0.24945050037700 | 0.06615688325860 | T | T | T |
| 0.50052027176200 | 0.91436250077700 | 0.06651613076470 | T | T | T |
| 0.49945131930100 | 0.58235300486400 | 0.06704325216700 | T | T | T |
| 0.25000309202100 | 0.24951320344000 | 0.06596271301280 | T | T | T |
| 0.25048871850200 | 0.91445001868800 | 0.06648332396300 | T | T | T |
| 0.24955215066100 | 0.58101079469800 | 0.06653067029350 | T | T | T |
| 0.75123757996400 | 0.24694354669900 | 0.06673875004000 | T | T | T |
| 0.74999448917700 | 0.91344363763500 | 0.06644514207440 | T | T | T |
| 0.74833048773100 | 0.58078030040200 | 0.06791311593320 | T | T | T |
| 0.12500000002200 | 0.08332999798400 | 0.13043999673400 | F | F | F |
| 0.12500000002200 | 0.7499999984900  | 0.13043999673400 | F | F | F |
| 0.12500000002200 | 0.41666999457100 | 0.13043999673400 | F | F | F |
| 0.62499999998400 | 0.08332999798400 | 0.13043999673400 | F | F | F |
| 0.62499999998400 | 0.7499999984900  | 0.13043999673400 | F | F | F |
| 0.62499999998400 | 0.41666999457100 | 0.13043999673400 | F | F | F |
| 0.37500000000400 | 0.08332999798400 | 0.13043999673400 | F | F | F |
| 0.37500000000400 | 0.7499999984900  | 0.13043999673400 | F | F | F |
| 0.37500000000400 | 0.41666999457100 | 0.13043999673400 | F | F | F |
| 0.87500000009500 | 0.08332999798400 | 0.13043999673400 | F | F | F |
| 0.87500000009500 | 0.7499999984900  | 0.13043999673400 | F | F | F |

|                  |                  |                  |   |   |   |
|------------------|------------------|------------------|---|---|---|
| 0.87500000009500 | 0.41666999457100 | 0.13043999673400 | F | F | F |
| 0.99998537544800 | 0.24952468375700 | 0.19466844703600 | T | T | T |
| 0.99906911567300 | 0.91420593524800 | 0.19462401075700 | T | T | T |
| 0.99829974723500 | 0.57964702923100 | 0.19299694232800 | T | T | T |
| 0.50015676448100 | 0.24946673098200 | 0.19466465795300 | T | T | T |
| 0.50055415061400 | 0.91406268090800 | 0.19430074664000 | T | T | T |
| 0.49946871812300 | 0.58340690411300 | 0.19467444438300 | T | T | T |
| 0.24997439275000 | 0.24951273490900 | 0.19485684443500 | T | T | T |
| 0.25052671391100 | 0.91407787174700 | 0.19436960519700 | T | T | T |
| 0.24959528756900 | 0.58147569991500 | 0.19434934363400 | T | T | T |
| 0.75068919779200 | 0.24757383373200 | 0.19413433625700 | T | T | T |
| 0.74994086218300 | 0.91314635462900 | 0.19448024932900 | T | T | T |
| 0.74806533666500 | 0.58227035707000 | 0.19405091294800 | T | T | T |
| 0.37623652196400 | 0.09131288217870 | 0.26528265466400 | T | T | T |
| 0.37379399076400 | 0.75861708100300 | 0.26523882888200 | T | T | T |
| 0.37533877292900 | 0.42833943799400 | 0.26622066831000 | T | T | T |
| 0.87597523227500 | 0.09117061786330 | 0.26525551744700 | T | T | T |
| 0.87287355967700 | 0.75126015362500 | 0.26501381820800 | T | T | T |
| 0.87459187654000 | 0.42574203812500 | 0.26524371629800 | T | T | T |
| 0.12613708644900 | 0.09202361782540 | 0.26553856065200 | T | T | T |
| 0.12199289638000 | 0.75478808070700 | 0.26441484339500 | T | T | T |
| 0.12506685696200 | 0.42736170081400 | 0.26572850226500 | T | T | T |
| 0.62618764218800 | 0.09189787877180 | 0.26547377149800 | T | T | T |
| 0.62235026987100 | 0.75731673295400 | 0.26493798278300 | T | T | T |
| 0.62577781963900 | 0.42481569431000 | 0.26507354304300 | T | T | T |
| 0.58255184240200 | 0.66971476673800 | 0.38439989076700 | T | T | T |
| 0.71123361168800 | 0.62880756695000 | 0.36134313590600 | T | T | T |
| 0.51147529291400 | 0.73421713514700 | 0.36942896459700 | T | T | T |
| 0.50751346159500 | 0.63219305092900 | 0.33935098280400 | T | T | T |
| 0.55051864553500 | 0.82334804721900 | 0.32555578825300 | T | T | T |

|                  |                  |                  |   |   |   |
|------------------|------------------|------------------|---|---|---|
| 0.45154631236000 | 0.82362168044700 | 0.32823009972300 | T | T | T |
| 0.72150976634300 | 0.70911403094300 | 0.38789694540800 | T | T | T |
| 0.46037667872300 | 0.55805627235600 | 0.30742333670400 | T | T | T |
| 0.78520323452000 | 0.54169269705200 | 0.30324590237200 | T | T | T |
| 0.58702827091800 | 0.67276676392800 | 0.88094176306100 | T | T | T |
| 0.71479670941000 | 0.63247542486700 | 0.90470803900100 | T | T | T |
| 0.51276077655000 | 0.73475420177000 | 0.89443219885400 | T | T | T |
| 0.50913802964900 | 0.63208939070000 | 0.92385639762700 | T | T | T |
| 0.54979787832200 | 0.82372416248900 | 0.93842490546200 | T | T | T |
| 0.45076044507600 | 0.82270432405700 | 0.93572688758900 | T | T | T |
| 0.72116016443000 | 0.71983108880200 | 0.88593139971500 | T | T | T |
| 0.45957017783100 | 0.55834597209000 | 0.95521606548300 | T | T | T |
| 0.78635187233600 | 0.54109292583200 | 0.96022811438700 | T | T | T |
| 0.09555547907400 | 0.67670795856800 | 0.37734971221900 | T | T | T |
| 0.19390587581400 | 0.72258271436300 | 0.33788792156300 | T | T | T |
| 0.00724020659002 | 0.73143574002700 | 0.36312507471800 | T | T | T |
| 0.01759934783850 | 0.62836739080900 | 0.35348513831300 | T | T | T |
| 0.03897351172820 | 0.81119342762600 | 0.32456006899700 | T | T | T |
| 0.93983380209300 | 0.79641254847600 | 0.32444531868600 | T | T | T |
| 0.23509267547200 | 0.71501463649400 | 0.38532294643600 | T | T | T |
| 0.95645635636600 | 0.53555985265100 | 0.30323422828300 | T | T | T |
| 0.05624588842900 | 0.53615362697600 | 0.30028033750400 | T | T | T |
| 0.09533545773120 | 0.67596703610900 | 0.88668396176700 | T | T | T |
| 0.19185754458600 | 0.72148023474600 | 0.92660880134200 | T | T | T |
| 0.00728842814554 | 0.73142814692200 | 0.90036058100300 | T | T | T |
| 0.01657410219660 | 0.62833998797600 | 0.91028486277900 | T | T | T |
| 0.03931442612140 | 0.81076121800800 | 0.93905908434100 | T | T | T |
| 0.93998029621800 | 0.79680116655200 | 0.93870093377200 | T | T | T |
| 0.23515093512500 | 0.71397984915200 | 0.87963599870500 | T | T | T |
| 0.95566546647000 | 0.53517311473100 | 0.95995561122600 | T | T | T |

|                  |                  |                  |   |   |   |
|------------------|------------------|------------------|---|---|---|
| 0.05547424104500 | 0.53580715529500 | 0.96262675430200 | T | T | T |
| 0.68590472208600 | 0.54291680178200 | 0.29961485234800 | T | T | T |
| 0.68683768774000 | 0.54206566599800 | 0.96346373425200 | T | T | T |
| 0.69097537009200 | 0.65758785514400 | 0.38793189447600 | T | T | T |
| 0.51995084847800 | 0.67535402278200 | 0.37721447701800 | T | T | T |
| 0.50295838369200 | 0.82733243365800 | 0.34718334133800 | T | T | T |
| 0.50373274169900 | 0.60121118183000 | 0.30722709826200 | T | T | T |
| 0.69645308280300 | 0.66676968798900 | 0.87972465908000 | T | T | T |
| 0.52358497373100 | 0.67628502723800 | 0.88656743636700 | T | T | T |
| 0.50218792971400 | 0.82787438461600 | 0.91682645588000 | T | T | T |
| 0.50387023104200 | 0.60063119967600 | 0.95577934652700 | T | T | T |
| 0.19182346379000 | 0.69168526125900 | 0.36583198908600 | T | T | T |
| 0.02980679221600 | 0.67106446178100 | 0.37659137120400 | T | T | T |
| 0.99012514682300 | 0.80325273980600 | 0.34541881405800 | T | T | T |
| 0.00641869376161 | 0.57232291916000 | 0.30786459177200 | T | T | T |
| 0.19157098253600 | 0.69011171589100 | 0.89876590545400 | T | T | T |
| 0.02954192285970 | 0.67092560953500 | 0.88716400533100 | T | T | T |
| 0.99061991805100 | 0.80369284918500 | 0.91796944895100 | T | T | T |
| 0.00554086247454 | 0.57214396126900 | 0.95542954713400 | T | T | T |
| 0.73582924679900 | 0.57903306128000 | 0.30678193272700 | T | T | T |
| 0.73690457102200 | 0.57846438890100 | 0.95688314946300 | T | T | T |
| 0.61657926677300 | 0.48868957864000 | 0.45375347175000 | T | T | T |
| 0.61730893959000 | 0.48945954261500 | 0.81430304209000 | T | T | T |
| 0.64354643666200 | 0.48044679429300 | 0.41893117080100 | T | T | T |
| 0.64629918538900 | 0.48735165338800 | 0.84894081775500 | T | T | T |

**5) Large supercell 1-H<sup>+</sup><sub>sol</sub> IS**

POSCAR

1

46.81727999995964 0.00000000000000 0.00000000000000

0.000000000000000 30.38812199999634 0.000000000000000  
0.000000000000000 0.000000000000000 49.65722999997833

Ga P H O C

540 540 180 108 18

Direct

|                  |                  |                  |   |   |   |
|------------------|------------------|------------------|---|---|---|
| 0.00069959136236 | 0.01555881165760 | 0.00748578629726 | T | T | T |
| 0.00069959136264 | 0.01555881165870 | 0.34081911963000 | T | T | T |
| 0.00069959136255 | 0.01555881165730 | 0.67415245296400 | T | T | T |
| 0.33403292469600 | 0.01555881165830 | 0.00748578629748 | T | T | T |
| 0.33403292469600 | 0.01555881165820 | 0.34081911963000 | T | T | T |
| 0.33403292469600 | 0.01555881165770 | 0.67415245296400 | T | T | T |
| 0.66736625803000 | 0.01555881165820 | 0.00748578629742 | T | T | T |
| 0.66736625803000 | 0.01555881165780 | 0.34081911963000 | T | T | T |
| 0.66736625803000 | 0.01555881165760 | 0.67415245296400 | T | T | T |
| 0.33235083485600 | 0.01553483738860 | 0.22992782168800 | T | T | T |
| 0.33235083485600 | 0.01553483738860 | 0.56326115502100 | T | T | T |
| 0.33235083485600 | 0.01553483738910 | 0.89659448835400 | T | T | T |
| 0.66568416818900 | 0.01553483738870 | 0.22992782168800 | T | T | T |
| 0.66568416819000 | 0.01553483738850 | 0.56326115502100 | T | T | T |
| 0.66568416819000 | 0.01553483738850 | 0.89659448835400 | T | T | T |
| 0.99901750152200 | 0.01553483738860 | 0.22992782168800 | T | T | T |
| 0.99901750152200 | 0.01553483738860 | 0.56326115502100 | T | T | T |
| 0.99901750152200 | 0.01553483738860 | 0.89659448835400 | T | T | T |
| 0.00114622988023 | 0.01586501220640 | 0.11787802743000 | T | T | T |
| 0.00114622988033 | 0.01586501220640 | 0.45121136076300 | T | T | T |
| 0.00114622988024 | 0.01586501220650 | 0.78454469409700 | T | T | T |
| 0.33447956321300 | 0.01586501220670 | 0.11787802743000 | T | T | T |
| 0.33447956321400 | 0.01586501220670 | 0.45121136076300 | T | T | T |
| 0.33447956321400 | 0.01586501220670 | 0.78454469409700 | T | T | T |
| 0.66781289654700 | 0.01586501220640 | 0.11787802743000 | T | T | T |

|                  |                  |                  |   |   |   |
|------------------|------------------|------------------|---|---|---|
| 0.66781289654700 | 0.01586501220680 | 0.45121136076300 | T | T | T |
| 0.66781289654700 | 0.01586501220650 | 0.78454469409700 | T | T | T |
| 0.16615708297500 | 0.01537574888230 | 0.00882009740949 | T | T | T |
| 0.16615708297500 | 0.01537574888260 | 0.34215343074200 | T | T | T |
| 0.16615708297500 | 0.01537574888200 | 0.67548676407600 | T | T | T |
| 0.49949041630900 | 0.01537574888260 | 0.00882009740926 | T | T | T |
| 0.49949041630800 | 0.01537574888260 | 0.34215343074100 | T | T | T |
| 0.49949041630900 | 0.01537574888220 | 0.67548676407600 | T | T | T |
| 0.83282374964200 | 0.01537574888290 | 0.00882009740903 | T | T | T |
| 0.83282374964200 | 0.01537574888310 | 0.34215343074100 | T | T | T |
| 0.83282374964200 | 0.01537574888280 | 0.67548676407600 | T | T | T |
| 0.16399559641500 | 0.01220622255960 | 0.22561851471200 | T | T | T |
| 0.16399559641500 | 0.01220622255960 | 0.55895184804600 | T | T | T |
| 0.16399559641500 | 0.01220622256030 | 0.89228518137900 | T | T | T |
| 0.49732892974900 | 0.01220622255960 | 0.22561851471200 | T | T | T |
| 0.49732892974900 | 0.01220622256010 | 0.55895184804600 | T | T | T |
| 0.49732892974900 | 0.01220622256010 | 0.89228518137900 | T | T | T |
| 0.83066226308100 | 0.01220622255990 | 0.22561851471200 | T | T | T |
| 0.83066226308100 | 0.01220622256010 | 0.55895184804600 | T | T | T |
| 0.83066226308200 | 0.01220622256030 | 0.89228518137900 | T | T | T |
| 0.16319565165000 | 0.98089000410000 | 0.10303350607400 | T | T | T |
| 0.16319565165000 | 0.98089000410100 | 0.43636683940700 | T | T | T |
| 0.16319565165000 | 0.98089000410100 | 0.76970017274000 | T | T | T |
| 0.49652898498300 | 0.98089000410100 | 0.10303350607400 | T | T | T |
| 0.49652898498300 | 0.98089000410000 | 0.43636683940700 | T | T | T |
| 0.49652898498300 | 0.98089000410100 | 0.76970017274000 | T | T | T |
| 0.82986231831700 | 0.98089000410100 | 0.10303350607400 | T | T | T |
| 0.82986231831600 | 0.98089000410100 | 0.43636683940700 | T | T | T |
| 0.82986231831600 | 0.98089000410100 | 0.76970017274100 | T | T | T |
| 0.08347971896480 | 0.01572559064520 | 0.00748336870798 | T | T | T |

|                  |                  |                  |   |   |   |
|------------------|------------------|------------------|---|---|---|
| 0.08347971896490 | 0.01572559064550 | 0.34081670204100 | T | T | T |
| 0.08347971896490 | 0.01572559064480 | 0.67415003537500 | T | T | T |
| 0.41681305229800 | 0.01572559064550 | 0.00748336870789 | T | T | T |
| 0.41681305229800 | 0.01572559064600 | 0.34081670204100 | T | T | T |
| 0.41681305229800 | 0.01572559064520 | 0.67415003537500 | T | T | T |
| 0.75014638563200 | 0.01572559064540 | 0.00748336870803 | T | T | T |
| 0.75014638563200 | 0.01572559064560 | 0.34081670204100 | T | T | T |
| 0.75014638563200 | 0.01572559064470 | 0.67415003537500 | T | T | T |
| 0.08106146220250 | 0.01591210074930 | 0.22824301263400 | T | T | T |
| 0.08106146220260 | 0.01591210074970 | 0.56157634596800 | T | T | T |
| 0.08106146220260 | 0.01591210074950 | 0.89490967930000 | T | T | T |
| 0.41439479553600 | 0.01591210074980 | 0.22824301263400 | T | T | T |
| 0.41439479553600 | 0.01591210074950 | 0.56157634596800 | T | T | T |
| 0.41439479553600 | 0.01591210075020 | 0.89490967930100 | T | T | T |
| 0.74772812887000 | 0.01591210075010 | 0.22824301263400 | T | T | T |
| 0.74772812887000 | 0.01591210074940 | 0.56157634596800 | T | T | T |
| 0.74772812887000 | 0.01591210075020 | 0.89490967930100 | T | T | T |
| 0.08370311396170 | 0.01480946700410 | 0.12006809203300 | T | T | T |
| 0.08370311396180 | 0.01480946700470 | 0.45340142536700 | T | T | T |
| 0.08370311396170 | 0.01480946700450 | 0.78673475870100 | T | T | T |
| 0.41703644729500 | 0.01480946700480 | 0.12006809203300 | T | T | T |
| 0.41703644729500 | 0.01480946700530 | 0.45340142536700 | T | T | T |
| 0.41703644729500 | 0.01480946700500 | 0.78673475870100 | T | T | T |
| 0.75036978062900 | 0.01480946700460 | 0.12006809203400 | T | T | T |
| 0.75036978062900 | 0.01480946700550 | 0.45340142536700 | T | T | T |
| 0.75036978062800 | 0.01480946700510 | 0.78673475870100 | T | T | T |
| 0.24989853670300 | 0.01567368890530 | 0.00762386024293 | T | T | T |
| 0.24989853670300 | 0.01567368890530 | 0.34095719357600 | T | T | T |
| 0.24989853670200 | 0.01567368890490 | 0.67429052691000 | T | T | T |
| 0.58323187003600 | 0.01567368890530 | 0.00762386024312 | T | T | T |

|                  |                  |                  |   |   |   |
|------------------|------------------|------------------|---|---|---|
| 0.58323187003600 | 0.01567368890520 | 0.34095719357600 | T | T | T |
| 0.58323187003600 | 0.01567368890450 | 0.67429052691000 | T | T | T |
| 0.91656520336900 | 0.01567368890530 | 0.00762386024296 | T | T | T |
| 0.91656520336900 | 0.01567368890560 | 0.34095719357600 | T | T | T |
| 0.91656520336900 | 0.01567368890500 | 0.67429052691000 | T | T | T |
| 0.24998709700400 | 0.01572249782220 | 0.22987512301800 | T | T | T |
| 0.24998709700400 | 0.01572249782210 | 0.56320845635100 | T | T | T |
| 0.24998709700400 | 0.01572249782260 | 0.89654178968500 | T | T | T |
| 0.58332043033800 | 0.01572249782220 | 0.22987512301800 | T | T | T |
| 0.58332043033700 | 0.01572249782190 | 0.56320845635100 | T | T | T |
| 0.58332043033700 | 0.01572249782190 | 0.89654178968500 | T | T | T |
| 0.91665376367000 | 0.01572249782250 | 0.22987512301800 | T | T | T |
| 0.91665376367000 | 0.01572249782240 | 0.56320845635100 | T | T | T |
| 0.91665376367000 | 0.01572249782230 | 0.89654178968400 | T | T | T |
| 0.25435780490200 | 0.01850932136110 | 0.11584999997000 | T | T | T |
| 0.25435780490200 | 0.01850932136090 | 0.44918333330400 | T | T | T |
| 0.25435780490200 | 0.01850932136150 | 0.78251666663700 | T | T | T |
| 0.58769113823500 | 0.01850932136100 | 0.11584999997000 | T | T | T |
| 0.58769113823500 | 0.01850932136110 | 0.44918333330400 | T | T | T |
| 0.58769113823600 | 0.01850932136100 | 0.78251666663700 | T | T | T |
| 0.92102447156900 | 0.01850932136180 | 0.11584999997000 | T | T | T |
| 0.92102447156900 | 0.01850932136140 | 0.44918333330300 | T | T | T |
| 0.92102447156900 | 0.01850932136160 | 0.78251666663700 | T | T | T |
| 0.12726133632600 | 0.06467589701760 | 0.05582817316510 | T | T | T |
| 0.12726133632700 | 0.06467589701730 | 0.38916150649900 | T | T | T |
| 0.12726133632700 | 0.06467589701820 | 0.72249483983100 | T | T | T |
| 0.46059466966000 | 0.06467589701780 | 0.05582817316460 | T | T | T |
| 0.46059466966000 | 0.06467589701760 | 0.38916150649800 | T | T | T |
| 0.46059466966000 | 0.06467589701820 | 0.72249483983100 | T | T | T |
| 0.79392800299300 | 0.06467589701790 | 0.05582817316500 | T | T | T |



|                  |                  |                  |   |   |   |
|------------------|------------------|------------------|---|---|---|
| 0.79392800299300 | 0.06467589701750 | 0.38916150649900 | T | T | T |
| 0.79392800299300 | 0.06467589701850 | 0.72249483983100 | T | T | T |
| 0.12499307339800 | 0.06484367006400 | 0.27770665411000 | T | T | T |
| 0.12499307339800 | 0.06484367006370 | 0.61103998744300 | T | T | T |
| 0.12499307339800 | 0.06484367006300 | 0.94437332077600 | T | T | T |
| 0.45832640673100 | 0.06484367006410 | 0.27770665410900 | T | T | T |
| 0.45832640673100 | 0.06484367006380 | 0.61103998744200 | T | T | T |
| 0.45832640673100 | 0.06484367006300 | 0.94437332077600 | T | T | T |
| 0.79165974006400 | 0.06484367006410 | 0.27770665410900 | T | T | T |
| 0.79165974006400 | 0.06484367006410 | 0.61103998744200 | T | T | T |
| 0.79165974006400 | 0.06484367006310 | 0.94437332077600 | T | T | T |
| 0.12526960753100 | 0.06359361893730 | 0.16366346657700 | T | T | T |
| 0.12526960753100 | 0.06359361893740 | 0.49699679991000 | T | T | T |
| 0.12526960753100 | 0.06359361893800 | 0.83033013324400 | T | T | T |
| 0.45860294086500 | 0.06359361893710 | 0.16366346657700 | T | T | T |
| 0.45860294086400 | 0.06359361893740 | 0.49699679991000 | T | T | T |
| 0.45860294086400 | 0.06359361893780 | 0.83033013324400 | T | T | T |
| 0.79193627419800 | 0.06359361893740 | 0.16366346657700 | T | T | T |
| 0.79193627419800 | 0.06359361893740 | 0.49699679991000 | T | T | T |
| 0.79193627419800 | 0.06359361893840 | 0.83033013324400 | T | T | T |
| 0.29228367416300 | 0.06436090687480 | 0.05464708774780 | T | T | T |
| 0.29228367416400 | 0.06436090687410 | 0.38798042108100 | T | T | T |
| 0.29228367416400 | 0.06436090687520 | 0.72131375441400 | T | T | T |
| 0.62561700749700 | 0.06436090687410 | 0.05464708774820 | T | T | T |
| 0.62561700749700 | 0.06436090687340 | 0.38798042108200 | T | T | T |
| 0.62561700749700 | 0.06436090687460 | 0.72131375441400 | T | T | T |
| 0.95895034083000 | 0.06436090687450 | 0.05464708774770 | T | T | T |
| 0.95895034083000 | 0.06436090687410 | 0.38798042108100 | T | T | T |
| 0.95895034083000 | 0.06436090687500 | 0.72131375441400 | T | T | T |
| 0.29184556839600 | 0.06437537275390 | 0.27760316538300 | T | T | T |

|                  |                  |                  |   |   |   |
|------------------|------------------|------------------|---|---|---|
| 0.29184556839500 | 0.06437537275320 | 0.61093649871600 | T | T | T |
| 0.29184556839600 | 0.06437537275310 | 0.94426983205000 | T | T | T |
| 0.62517890172900 | 0.06437537275310 | 0.27760316538400 | T | T | T |
| 0.62517890172900 | 0.06437537275260 | 0.61093649871600 | T | T | T |
| 0.62517890173000 | 0.06437537275270 | 0.94426983205000 | T | T | T |
| 0.95851223506200 | 0.06437537275360 | 0.27760316538300 | T | T | T |
| 0.95851223506200 | 0.06437537275290 | 0.61093649871600 | T | T | T |
| 0.95851223506200 | 0.06437537275300 | 0.94426983205000 | T | T | T |
| 0.29206977289000 | 0.06424464219720 | 0.16574131835100 | T | T | T |
| 0.29206977289000 | 0.06424464219750 | 0.49907465168400 | T | T | T |
| 0.29206977289000 | 0.06424464219800 | 0.83240798501700 | T | T | T |
| 0.62540310622400 | 0.06424464219670 | 0.16574131835100 | T | T | T |
| 0.62540310622300 | 0.06424464219690 | 0.49907465168400 | T | T | T |
| 0.62540310622300 | 0.06424464219760 | 0.83240798501700 | T | T | T |
| 0.95873643955600 | 0.06424464219690 | 0.16574131835100 | T | T | T |
| 0.95873643955600 | 0.06424464219730 | 0.49907465168400 | T | T | T |
| 0.95873643955600 | 0.06424464219800 | 0.83240798501700 | T | T | T |
| 0.04307469630570 | 0.06425934123520 | 0.05518405255030 | T | T | T |
| 0.04307469630580 | 0.06425934123460 | 0.38851738588400 | T | T | T |
| 0.04307469630570 | 0.06425934123550 | 0.72185071921700 | T | T | T |
| 0.37640802963900 | 0.06425934123520 | 0.05518405255060 | T | T | T |
| 0.37640802963900 | 0.06425934123470 | 0.38851738588400 | T | T | T |
| 0.37640802963900 | 0.06425934123550 | 0.72185071921700 | T | T | T |
| 0.70974136297300 | 0.06425934123540 | 0.05518405255020 | T | T | T |
| 0.70974136297300 | 0.06425934123500 | 0.38851738588400 | T | T | T |
| 0.70974136297300 | 0.06425934123570 | 0.72185071921700 | T | T | T |
| 0.04142616008250 | 0.06418329556880 | 0.27661479679300 | T | T | T |
| 0.04142616008260 | 0.06418329556870 | 0.60994813012600 | T | T | T |
| 0.04142616008250 | 0.06418329556850 | 0.94328146346000 | T | T | T |
| 0.37475949341600 | 0.06418329556880 | 0.27661479679300 | T | T | T |

|                  |                  |                  |   |   |   |
|------------------|------------------|------------------|---|---|---|
| 0.37475949341600 | 0.06418329556860 | 0.60994813012600 | T | T | T |
| 0.37475949341600 | 0.06418329556860 | 0.94328146346000 | T | T | T |
| 0.70809282675000 | 0.06418329556910 | 0.27661479679200 | T | T | T |
| 0.70809282675000 | 0.06418329556870 | 0.60994813012500 | T | T | T |
| 0.70809282675000 | 0.06418329556880 | 0.94328146345900 | T | T | T |
| 0.04141459845750 | 0.06419851960510 | 0.16582005559800 | T | T | T |
| 0.04141459845780 | 0.06419851960560 | 0.49915338893100 | T | T | T |
| 0.04141459845770 | 0.06419851960590 | 0.83248672226500 | T | T | T |
| 0.37474793179100 | 0.06419851960510 | 0.16582005559800 | T | T | T |
| 0.37474793179100 | 0.06419851960560 | 0.49915338893100 | T | T | T |
| 0.37474793179100 | 0.06419851960590 | 0.83248672226500 | T | T | T |
| 0.70808126512500 | 0.06419851960540 | 0.16582005559800 | T | T | T |
| 0.70808126512500 | 0.06419851960580 | 0.49915338893100 | T | T | T |
| 0.70808126512500 | 0.06419851960630 | 0.83248672226500 | T | T | T |
| 0.20577340577100 | 0.06445938686140 | 0.05530620796940 | T | T | T |
| 0.20577340577100 | 0.06445938686060 | 0.38863954130300 | T | T | T |
| 0.20577340577100 | 0.06445938686220 | 0.72197287463600 | T | T | T |
| 0.53910673910400 | 0.06445938686110 | 0.05530620796950 | T | T | T |
| 0.53910673910400 | 0.06445938686040 | 0.38863954130300 | T | T | T |
| 0.53910673910400 | 0.06445938686180 | 0.72197287463600 | T | T | T |
| 0.87244007243700 | 0.06445938686170 | 0.05530620796970 | T | T | T |
| 0.87244007243700 | 0.06445938686090 | 0.38863954130300 | T | T | T |
| 0.87244007243700 | 0.06445938686240 | 0.72197287463600 | T | T | T |
| 0.20784402872900 | 0.06436539925340 | 0.27782755884600 | T | T | T |
| 0.20784402872900 | 0.06436539925320 | 0.61116089217900 | T | T | T |
| 0.20784402872900 | 0.06436539925310 | 0.94449422551300 | T | T | T |
| 0.54117736206200 | 0.06436539925300 | 0.27782755884600 | T | T | T |
| 0.54117736206200 | 0.06436539925300 | 0.61116089217900 | T | T | T |
| 0.54117736206200 | 0.06436539925290 | 0.94449422551300 | T | T | T |
| 0.87451069539500 | 0.06436539925360 | 0.27782755884600 | T | T | T |

|                   |                  |                   |   |   |   |
|-------------------|------------------|-------------------|---|---|---|
| 0.87451069539500  | 0.06436539925350 | 0.61116089217900  | T | T | T |
| 0.87451069539500  | 0.06436539925320 | 0.94449422551300  | T | T | T |
| 0.20796001335600  | 0.06682152891000 | 0.16736139490900  | T | T | T |
| 0.20796001335600  | 0.06682152890920 | 0.50069472824200  | T | T | T |
| 0.20796001335600  | 0.06682152891060 | 0.83402806157600  | T | T | T |
| 0.54129334668900  | 0.06682152890960 | 0.16736139490900  | T | T | T |
| 0.54129334668900  | 0.06682152890890 | 0.50069472824200  | T | T | T |
| 0.54129334668900  | 0.06682152891020 | 0.83402806157600  | T | T | T |
| 0.87462668002300  | 0.06682152891000 | 0.16736139490900  | T | T | T |
| 0.87462668002300  | 0.06682152890920 | 0.50069472824200  | T | T | T |
| 0.87462668002300  | 0.06682152891100 | 0.83402806157600  | T | T | T |
| 0.00000000000000  | 0.13043999673400 | 0.00000000000000  | F | F | F |
| 0.00000000000000  | 0.13043999673400 | 0.333333333333400 | F | F | F |
| 0.00000000000000  | 0.13043999673400 | 0.666666666666600 | F | F | F |
| 0.333333333333400 | 0.13043999673400 | 0.000000000000000 | F | F | F |
| 0.333333333333400 | 0.13043999673400 | 0.333333333333400 | F | F | F |
| 0.333333333333400 | 0.13043999673400 | 0.666666666666600 | F | F | F |
| 0.666666666666600 | 0.13043999673400 | 0.000000000000000 | F | F | F |
| 0.666666666666600 | 0.13043999673400 | 0.333333333333400 | F | F | F |
| 0.666666666666600 | 0.13043999673400 | 0.666666666666600 | F | F | F |
| 0.000000000000000 | 0.13043999673400 | 0.22222334138000  | F | F | F |
| 0.000000000000000 | 0.13043999673400 | 0.55555667471300  | F | F | F |
| 0.000000000000000 | 0.13043999673400 | 0.88889000804700  | F | F | F |
| 0.333333333333400 | 0.13043999673400 | 0.22222334138000  | F | F | F |
| 0.333333333333400 | 0.13043999673400 | 0.55555667471300  | F | F | F |
| 0.333333333333400 | 0.13043999673400 | 0.88889000804700  | F | F | F |
| 0.666666666666600 | 0.13043999673400 | 0.22222334138000  | F | F | F |
| 0.666666666666600 | 0.13043999673400 | 0.55555667471300  | F | F | F |
| 0.666666666666600 | 0.13043999673400 | 0.88889000804700  | F | F | F |
| 0.000000000000000 | 0.13043999673400 | 0.11111000180100  | F | F | F |

|                    |                  |                    |   |   |   |
|--------------------|------------------|--------------------|---|---|---|
| 0.0000000000000000 | 0.13043999673400 | 0.44444333513300   | F | F | F |
| 0.0000000000000000 | 0.13043999673400 | 0.77777666846700   | F | F | F |
| 0.333333333333400  | 0.13043999673400 | 0.11111000180100   | F | F | F |
| 0.333333333333400  | 0.13043999673400 | 0.44444333513300   | F | F | F |
| 0.333333333333400  | 0.13043999673400 | 0.77777666846700   | F | F | F |
| 0.666666666666600  | 0.13043999673400 | 0.11111000180100   | F | F | F |
| 0.666666666666600  | 0.13043999673400 | 0.44444333513300   | F | F | F |
| 0.666666666666600  | 0.13043999673400 | 0.77777666846700   | F | F | F |
| 0.166666666667500  | 0.13043999673400 | 0.0000000000000000 | F | F | F |
| 0.166666666667500  | 0.13043999673400 | 0.333333333333400  | F | F | F |
| 0.166666666667500  | 0.13043999673400 | 0.666666666666600  | F | F | F |
| 0.500000000000900  | 0.13043999673400 | 0.0000000000000000 | F | F | F |
| 0.500000000000900  | 0.13043999673400 | 0.333333333333400  | F | F | F |
| 0.500000000000900  | 0.13043999673400 | 0.666666666666600  | F | F | F |
| 0.833333333334100  | 0.13043999673400 | 0.0000000000000000 | F | F | F |
| 0.833333333334100  | 0.13043999673400 | 0.333333333333400  | F | F | F |
| 0.833333333334100  | 0.13043999673400 | 0.666666666666600  | F | F | F |
| 0.166666666667500  | 0.13043999673400 | 0.22222334138000   | F | F | F |
| 0.166666666667500  | 0.13043999673400 | 0.55555667471300   | F | F | F |
| 0.166666666667500  | 0.13043999673400 | 0.88889000804700   | F | F | F |
| 0.500000000000900  | 0.13043999673400 | 0.22222334138000   | F | F | F |
| 0.500000000000900  | 0.13043999673400 | 0.55555667471300   | F | F | F |
| 0.500000000000900  | 0.13043999673400 | 0.88889000804700   | F | F | F |
| 0.833333333334100  | 0.13043999673400 | 0.22222334138000   | F | F | F |
| 0.833333333334100  | 0.13043999673400 | 0.55555667471300   | F | F | F |
| 0.833333333334100  | 0.13043999673400 | 0.88889000804700   | F | F | F |
| 0.166666666667500  | 0.13043999673400 | 0.11111000180100   | F | F | F |
| 0.166666666667500  | 0.13043999673400 | 0.44444333513300   | F | F | F |
| 0.166666666667500  | 0.13043999673400 | 0.77777666846700   | F | F | F |
| 0.500000000000900  | 0.13043999673400 | 0.11111000180100   | F | F | F |

|                  |                  |                  |   |   |   |
|------------------|------------------|------------------|---|---|---|
| 0.50000000000900 | 0.13043999673400 | 0.44444333513300 | F | F | F |
| 0.50000000000900 | 0.13043999673400 | 0.77777666846700 | F | F | F |
| 0.83333333334100 | 0.13043999673400 | 0.11111000180100 | F | F | F |
| 0.83333333334100 | 0.13043999673400 | 0.44444333513300 | F | F | F |
| 0.83333333334100 | 0.13043999673400 | 0.77777666846700 | F | F | F |
| 0.08333333332670 | 0.13043999673400 | 0.00000000000000 | F | F | F |
| 0.08333333332670 | 0.13043999673400 | 0.33333333333400 | F | F | F |
| 0.08333333332670 | 0.13043999673400 | 0.66666666666600 | F | F | F |
| 0.41666666666100 | 0.13043999673400 | 0.00000000000000 | F | F | F |
| 0.41666666666100 | 0.13043999673400 | 0.33333333333400 | F | F | F |
| 0.41666666666100 | 0.13043999673400 | 0.66666666666600 | F | F | F |
| 0.7499999999300  | 0.13043999673400 | 0.00000000000000 | F | F | F |
| 0.7499999999300  | 0.13043999673400 | 0.33333333333400 | F | F | F |
| 0.7499999999300  | 0.13043999673400 | 0.66666666666600 | F | F | F |
| 0.08333333332670 | 0.13043999673400 | 0.22222334138000 | F | F | F |
| 0.08333333332670 | 0.13043999673400 | 0.55555667471300 | F | F | F |
| 0.08333333332670 | 0.13043999673400 | 0.88889000804700 | F | F | F |
| 0.41666666666100 | 0.13043999673400 | 0.22222334138000 | F | F | F |
| 0.41666666666100 | 0.13043999673400 | 0.55555667471300 | F | F | F |
| 0.41666666666100 | 0.13043999673400 | 0.88889000804700 | F | F | F |
| 0.7499999999300  | 0.13043999673400 | 0.22222334138000 | F | F | F |
| 0.7499999999300  | 0.13043999673400 | 0.55555667471300 | F | F | F |
| 0.7499999999300  | 0.13043999673400 | 0.88889000804700 | F | F | F |
| 0.08333333332670 | 0.13043999673400 | 0.11111000180100 | F | F | F |
| 0.08333333332670 | 0.13043999673400 | 0.44444333513300 | F | F | F |
| 0.08333333332670 | 0.13043999673400 | 0.77777666846700 | F | F | F |
| 0.41666666666100 | 0.13043999673400 | 0.11111000180100 | F | F | F |
| 0.41666666666100 | 0.13043999673400 | 0.44444333513300 | F | F | F |
| 0.41666666666100 | 0.13043999673400 | 0.77777666846700 | F | F | F |
| 0.7499999999300  | 0.13043999673400 | 0.11111000180100 | F | F | F |

|                  |                  |                  |   |   |   |
|------------------|------------------|------------------|---|---|---|
| 0.7499999999300  | 0.13043999673400 | 0.44444333513300 | F | F | F |
| 0.7499999999300  | 0.13043999673400 | 0.77777666846700 | F | F | F |
| 0.25000000008900 | 0.13043999673400 | 0.00000000000000 | F | F | F |
| 0.25000000008900 | 0.13043999673400 | 0.33333333333400 | F | F | F |
| 0.25000000008900 | 0.13043999673400 | 0.66666666666600 | F | F | F |
| 0.58333333342100 | 0.13043999673400 | 0.00000000000000 | F | F | F |
| 0.58333333342100 | 0.13043999673400 | 0.33333333333400 | F | F | F |
| 0.58333333342100 | 0.13043999673400 | 0.66666666666600 | F | F | F |
| 0.91666666675500 | 0.13043999673400 | 0.00000000000000 | F | F | F |
| 0.91666666675500 | 0.13043999673400 | 0.33333333333400 | F | F | F |
| 0.91666666675500 | 0.13043999673400 | 0.66666666666600 | F | F | F |
| 0.25000000008900 | 0.13043999673400 | 0.22222334138000 | F | F | F |
| 0.25000000008900 | 0.13043999673400 | 0.55555667471300 | F | F | F |
| 0.25000000008900 | 0.13043999673400 | 0.88889000804700 | F | F | F |
| 0.58333333342100 | 0.13043999673400 | 0.22222334138000 | F | F | F |
| 0.58333333342100 | 0.13043999673400 | 0.55555667471300 | F | F | F |
| 0.58333333342100 | 0.13043999673400 | 0.88889000804700 | F | F | F |
| 0.91666666675500 | 0.13043999673400 | 0.22222334138000 | F | F | F |
| 0.91666666675500 | 0.13043999673400 | 0.55555667471300 | F | F | F |
| 0.91666666675500 | 0.13043999673400 | 0.88889000804700 | F | F | F |
| 0.25000000008900 | 0.13043999673400 | 0.11111000180100 | F | F | F |
| 0.25000000008900 | 0.13043999673400 | 0.44444333513300 | F | F | F |
| 0.25000000008900 | 0.13043999673400 | 0.77777666846700 | F | F | F |
| 0.58333333342100 | 0.13043999673400 | 0.11111000180100 | F | F | F |
| 0.58333333342100 | 0.13043999673400 | 0.44444333513300 | F | F | F |
| 0.58333333342100 | 0.13043999673400 | 0.77777666846700 | F | F | F |
| 0.91666666675500 | 0.13043999673400 | 0.11111000180100 | F | F | F |
| 0.91666666675500 | 0.13043999673400 | 0.44444333513300 | F | F | F |
| 0.91666666675500 | 0.13043999673400 | 0.77777666846700 | F | F | F |
| 0.12611701626800 | 0.19584603463200 | 0.05673019795490 | T | T | T |

|                  |                  |                  |   |   |   |
|------------------|------------------|------------------|---|---|---|
| 0.12611701626800 | 0.19584603463300 | 0.39006353128800 | T | T | T |
| 0.12611701626800 | 0.19584603463200 | 0.72339686462100 | T | T | T |
| 0.45945034960000 | 0.19584603463200 | 0.05673019795520 | T | T | T |
| 0.45945034960000 | 0.19584603463300 | 0.39006353128800 | T | T | T |
| 0.45945034960100 | 0.19584603463200 | 0.72339686462200 | T | T | T |
| 0.79278368293500 | 0.19584603463200 | 0.05673019795530 | T | T | T |
| 0.79278368293500 | 0.19584603463300 | 0.39006353128900 | T | T | T |
| 0.79278368293500 | 0.19584603463200 | 0.72339686462200 | T | T | T |
| 0.12509711963200 | 0.19601400463400 | 0.27760755935400 | T | T | T |
| 0.12509711963200 | 0.19601400463400 | 0.61094089268700 | T | T | T |
| 0.12509711963200 | 0.19601400463500 | 0.94427422602100 | T | T | T |
| 0.45843045296500 | 0.19601400463400 | 0.27760755935400 | T | T | T |
| 0.45843045296600 | 0.19601400463400 | 0.61094089268700 | T | T | T |
| 0.45843045296600 | 0.19601400463500 | 0.94427422602100 | T | T | T |
| 0.79176378629900 | 0.19601400463400 | 0.27760755935400 | T | T | T |
| 0.79176378629900 | 0.19601400463400 | 0.61094089268700 | T | T | T |
| 0.79176378629900 | 0.19601400463500 | 0.94427422602100 | T | T | T |
| 0.12533286802300 | 0.19899921495800 | 0.16347345223800 | T | T | T |
| 0.12533286802300 | 0.19899921495900 | 0.49680678557100 | T | T | T |
| 0.12533286802300 | 0.19899921495800 | 0.83014011890500 | T | T | T |
| 0.45866620135600 | 0.19899921495800 | 0.16347345223800 | T | T | T |
| 0.45866620135600 | 0.19899921495900 | 0.49680678557100 | T | T | T |
| 0.45866620135600 | 0.19899921495800 | 0.83014011890500 | T | T | T |
| 0.79199953468900 | 0.19899921495800 | 0.16347345223800 | T | T | T |
| 0.79199953468900 | 0.19899921495900 | 0.49680678557100 | T | T | T |
| 0.79199953468900 | 0.19899921495800 | 0.83014011890500 | T | T | T |
| 0.29216495392800 | 0.19628169301900 | 0.05479569291700 | T | T | T |
| 0.29216495392800 | 0.19628169302000 | 0.38812902625000 | T | T | T |
| 0.29216495392800 | 0.19628169301900 | 0.72146235958400 | T | T | T |
| 0.62549828726200 | 0.19628169301900 | 0.05479569291740 | T | T | T |



|                  |                  |                  |   |   |   |
|------------------|------------------|------------------|---|---|---|
| 0.62549828726200 | 0.19628169302000 | 0.38812902625100 | T | T | T |
| 0.62549828726200 | 0.19628169301900 | 0.72146235958400 | T | T | T |
| 0.95883162059500 | 0.19628169301900 | 0.05479569291730 | T | T | T |
| 0.95883162059500 | 0.19628169302000 | 0.38812902625000 | T | T | T |
| 0.95883162059500 | 0.19628169301900 | 0.72146235958400 | T | T | T |
| 0.29187105256600 | 0.19624802806100 | 0.27763415022400 | T | T | T |
| 0.29187105256600 | 0.19624802806200 | 0.61096748355600 | T | T | T |
| 0.29187105256600 | 0.19624802806200 | 0.94430081689000 | T | T | T |
| 0.62520438589900 | 0.19624802806100 | 0.27763415022400 | T | T | T |
| 0.62520438590000 | 0.19624802806200 | 0.61096748355600 | T | T | T |
| 0.62520438590000 | 0.19624802806200 | 0.94430081689100 | T | T | T |
| 0.95853771923200 | 0.19624802806100 | 0.27763415022400 | T | T | T |
| 0.95853771923300 | 0.19624802806200 | 0.61096748355600 | T | T | T |
| 0.95853771923200 | 0.19624802806200 | 0.94430081689000 | T | T | T |
| 0.29199943501400 | 0.19646729704200 | 0.16574894671200 | T | T | T |
| 0.29199943501400 | 0.19646729704200 | 0.49908228004500 | T | T | T |
| 0.29199943501400 | 0.19646729704100 | 0.83241561337900 | T | T | T |
| 0.62533276834800 | 0.19646729704300 | 0.16574894671200 | T | T | T |
| 0.62533276834800 | 0.19646729704200 | 0.49908228004600 | T | T | T |
| 0.62533276834800 | 0.19646729704200 | 0.83241561337900 | T | T | T |
| 0.95866610168100 | 0.19646729704200 | 0.16574894671200 | T | T | T |
| 0.95866610168100 | 0.19646729704200 | 0.49908228004500 | T | T | T |
| 0.95866610168100 | 0.19646729704100 | 0.83241561337900 | T | T | T |
| 0.04296564728300 | 0.19640693180800 | 0.05518858996060 | T | T | T |
| 0.04296564728300 | 0.19640693180900 | 0.38852192329400 | T | T | T |
| 0.04296564728290 | 0.19640693180800 | 0.72185525662700 | T | T | T |
| 0.37629898061600 | 0.19640693180900 | 0.05518858996080 | T | T | T |
| 0.37629898061600 | 0.19640693180900 | 0.38852192329400 | T | T | T |
| 0.37629898061600 | 0.19640693180800 | 0.72185525662700 | T | T | T |
| 0.70963231395000 | 0.19640693180800 | 0.05518858996060 | T | T | T |

|                  |                  |                  |   |   |   |
|------------------|------------------|------------------|---|---|---|
| 0.70963231395000 | 0.19640693180900 | 0.38852192329400 | T | T | T |
| 0.70963231395000 | 0.19640693180700 | 0.72185525662700 | T | T | T |
| 0.04144985915010 | 0.19645814694900 | 0.27668435316700 | T | T | T |
| 0.04144985915000 | 0.19645814695000 | 0.61001768650100 | T | T | T |
| 0.04144985915000 | 0.19645814695000 | 0.94335101983500 | T | T | T |
| 0.37478319248300 | 0.19645814694900 | 0.27668435316700 | T | T | T |
| 0.37478319248300 | 0.19645814695000 | 0.61001768650100 | T | T | T |
| 0.37478319248300 | 0.19645814695000 | 0.94335101983500 | T | T | T |
| 0.70811652581700 | 0.19645814694900 | 0.27668435316700 | T | T | T |
| 0.70811652581700 | 0.19645814694900 | 0.61001768650000 | T | T | T |
| 0.70811652581700 | 0.19645814694900 | 0.94335101983400 | T | T | T |
| 0.04147849558350 | 0.19650282380300 | 0.16580241485800 | T | T | T |
| 0.04147849558340 | 0.19650282380300 | 0.49913574819100 | T | T | T |
| 0.04147849558340 | 0.19650282380300 | 0.83246908152400 | T | T | T |
| 0.37481182891700 | 0.19650282380300 | 0.16580241485800 | T | T | T |
| 0.37481182891700 | 0.19650282380300 | 0.49913574819100 | T | T | T |
| 0.37481182891700 | 0.19650282380300 | 0.83246908152400 | T | T | T |
| 0.70814516225100 | 0.19650282380200 | 0.16580241485700 | T | T | T |
| 0.70814516225100 | 0.19650282380300 | 0.49913574819100 | T | T | T |
| 0.70814516225100 | 0.19650282380200 | 0.83246908152400 | T | T | T |
| 0.20576394280700 | 0.19616775642200 | 0.05535197687060 | T | T | T |
| 0.20576394280700 | 0.19616775642300 | 0.38868531020400 | T | T | T |
| 0.20576394280700 | 0.19616775642200 | 0.72201864353700 | T | T | T |
| 0.53909727614100 | 0.19616775642200 | 0.05535197687060 | T | T | T |
| 0.53909727614100 | 0.19616775642300 | 0.38868531020400 | T | T | T |
| 0.53909727614100 | 0.19616775642200 | 0.72201864353700 | T | T | T |
| 0.87243060947400 | 0.19616775642200 | 0.05535197687060 | T | T | T |
| 0.87243060947400 | 0.19616775642300 | 0.38868531020400 | T | T | T |
| 0.87243060947400 | 0.19616775642200 | 0.72201864353700 | T | T | T |
| 0.20787588628600 | 0.19639857643400 | 0.27780607735500 | T | T | T |

|                  |                  |                  |   |   |   |
|------------------|------------------|------------------|---|---|---|
| 0.20787588628600 | 0.19639857643400 | 0.61113941068700 | T | T | T |
| 0.20787588628600 | 0.19639857643500 | 0.94447274402200 | T | T | T |
| 0.54120921961900 | 0.19639857643400 | 0.27780607735500 | T | T | T |
| 0.54120921961900 | 0.19639857643500 | 0.61113941068700 | T | T | T |
| 0.54120921961900 | 0.19639857643500 | 0.94447274402100 | T | T | T |
| 0.87454255295300 | 0.19639857643400 | 0.27780607735400 | T | T | T |
| 0.87454255295300 | 0.19639857643400 | 0.61113941068700 | T | T | T |
| 0.87454255295200 | 0.19639857643400 | 0.94447274402100 | T | T | T |
| 0.20797070994500 | 0.19600604518600 | 0.16603515651000 | T | T | T |
| 0.20797070994500 | 0.19600604518600 | 0.49936848984300 | T | T | T |
| 0.20797070994500 | 0.19600604518600 | 0.83270182317600 | T | T | T |
| 0.54130404327800 | 0.19600604518600 | 0.16603515651000 | T | T | T |
| 0.54130404327800 | 0.19600604518600 | 0.49936848984300 | T | T | T |
| 0.54130404327800 | 0.19600604518600 | 0.83270182317700 | T | T | T |
| 0.87463737661100 | 0.19600604518600 | 0.16603515651000 | T | T | T |
| 0.87463737661100 | 0.19600604518500 | 0.49936848984300 | T | T | T |
| 0.87463737661100 | 0.19600604518600 | 0.83270182317600 | T | T | T |
| 0.00065434182387 | 0.24500537285600 | 0.00752436628274 | T | T | T |
| 0.00065434182423 | 0.24500537285500 | 0.34085769961600 | T | T | T |
| 0.00065434182424 | 0.24500537285600 | 0.67419103295000 | T | T | T |
| 0.33398767515700 | 0.24500537285500 | 0.00752436628256 | T | T | T |
| 0.33398767515700 | 0.24500537285500 | 0.34085769961500 | T | T | T |
| 0.33398767515700 | 0.24500537285600 | 0.67419103295000 | T | T | T |
| 0.66732100849100 | 0.24500537285600 | 0.00752436628254 | T | T | T |
| 0.66732100849100 | 0.24500537285500 | 0.34085769961500 | T | T | T |
| 0.66732100849100 | 0.24500537285600 | 0.67419103295000 | T | T | T |
| 0.33243680723500 | 0.24500369267900 | 0.22993851678700 | T | T | T |
| 0.33243680723500 | 0.24500369268000 | 0.56327185012000 | T | T | T |
| 0.33243680723500 | 0.24500369267900 | 0.89660518345400 | T | T | T |
| 0.66577014056800 | 0.24500369267900 | 0.22993851678700 | T | T | T |

|                  |                  |                  |   |   |   |
|------------------|------------------|------------------|---|---|---|
| 0.66577014056900 | 0.24500369268000 | 0.56327185012000 | T | T | T |
| 0.66577014056900 | 0.24500369267900 | 0.89660518345400 | T | T | T |
| 0.99910347390200 | 0.24500369268000 | 0.22993851678700 | T | T | T |
| 0.99910347390200 | 0.24500369268000 | 0.56327185012000 | T | T | T |
| 0.99910347390200 | 0.24500369268000 | 0.89660518345400 | T | T | T |
| 0.00115843158670 | 0.24484530657200 | 0.11791873598300 | T | T | T |
| 0.00115843158647 | 0.24484530657200 | 0.45125206931700 | T | T | T |
| 0.00115843158658 | 0.24484530657200 | 0.78458540265000 | T | T | T |
| 0.33449176492000 | 0.24484530657200 | 0.11791873598400 | T | T | T |
| 0.33449176492000 | 0.24484530657200 | 0.45125206931700 | T | T | T |
| 0.33449176492000 | 0.24484530657200 | 0.78458540265100 | T | T | T |
| 0.66782509825400 | 0.24484530657200 | 0.11791873598400 | T | T | T |
| 0.66782509825300 | 0.24484530657200 | 0.45125206931700 | T | T | T |
| 0.66782509825300 | 0.24484530657200 | 0.78458540265100 | T | T | T |
| 0.16600203917500 | 0.24506653375200 | 0.00904424843639 | T | T | T |
| 0.16600203917500 | 0.24506653375200 | 0.34237758176900 | T | T | T |
| 0.16600203917500 | 0.24506653375300 | 0.67571091510300 | T | T | T |
| 0.49933537250800 | 0.24506653375200 | 0.00904424843662 | T | T | T |
| 0.49933537250800 | 0.24506653375200 | 0.34237758177000 | T | T | T |
| 0.49933537250800 | 0.24506653375300 | 0.67571091510400 | T | T | T |
| 0.83266870584100 | 0.24506653375200 | 0.00904424843652 | T | T | T |
| 0.83266870584100 | 0.24506653375200 | 0.34237758177000 | T | T | T |
| 0.83266870584100 | 0.24506653375200 | 0.67571091510300 | T | T | T |
| 0.16524471919700 | 0.24864009346700 | 0.22561139223500 | T | T | T |
| 0.16524471919700 | 0.24864009346700 | 0.55894472556900 | T | T | T |
| 0.16524471919800 | 0.24864009346700 | 0.89227805890200 | T | T | T |
| 0.49857805253100 | 0.24864009346700 | 0.22561139223500 | T | T | T |
| 0.49857805253000 | 0.24864009346700 | 0.55894472556900 | T | T | T |
| 0.49857805253100 | 0.24864009346700 | 0.89227805890200 | T | T | T |
| 0.83191138586300 | 0.24864009346700 | 0.22561139223500 | T | T | T |

|                  |                  |                  |   |   |   |
|------------------|------------------|------------------|---|---|---|
| 0.83191138586300 | 0.24864009346600 | 0.55894472557000 | T | T | T |
| 0.83191138586400 | 0.24864009346700 | 0.89227805890200 | T | T | T |
| 0.16307259004400 | 0.27981071810500 | 0.10123227718000 | T | T | T |
| 0.16307259004400 | 0.27981071810400 | 0.43456561051200 | T | T | T |
| 0.16307259004400 | 0.27981071810500 | 0.76789894384600 | T | T | T |
| 0.49640592337700 | 0.27981071810500 | 0.10123227718000 | T | T | T |
| 0.49640592337700 | 0.27981071810400 | 0.43456561051200 | T | T | T |
| 0.49640592337700 | 0.27981071810500 | 0.76789894384600 | T | T | T |
| 0.82973925671100 | 0.27981071810400 | 0.10123227718000 | T | T | T |
| 0.82973925671100 | 0.27981071810300 | 0.43456561051300 | T | T | T |
| 0.82973925671100 | 0.27981071810400 | 0.76789894384600 | T | T | T |
| 0.08344788513230 | 0.24482718787800 | 0.00753507303512 | T | T | T |
| 0.08344788513230 | 0.24482718787800 | 0.34086840636900 | T | T | T |
| 0.08344788513220 | 0.24482718787800 | 0.67420173970200 | T | T | T |
| 0.41678121846500 | 0.24482718787800 | 0.00753507303518 | T | T | T |
| 0.41678121846500 | 0.24482718787700 | 0.34086840636900 | T | T | T |
| 0.41678121846500 | 0.24482718787800 | 0.67420173970300 | T | T | T |
| 0.75011455179900 | 0.24482718787700 | 0.00753507303515 | T | T | T |
| 0.75011455179900 | 0.24482718787700 | 0.34086840636800 | T | T | T |
| 0.75011455179900 | 0.24482718787800 | 0.67420173970300 | T | T | T |
| 0.08122066360320 | 0.24473699377300 | 0.22826508400100 | T | T | T |
| 0.08122066360310 | 0.24473699377300 | 0.56159841733400 | T | T | T |
| 0.08122066360300 | 0.24473699377200 | 0.89493175066700 | T | T | T |
| 0.41455399693700 | 0.24473699377200 | 0.22826508400100 | T | T | T |
| 0.41455399693600 | 0.24473699377300 | 0.56159841733400 | T | T | T |
| 0.41455399693600 | 0.24473699377200 | 0.89493175066700 | T | T | T |
| 0.74788733027000 | 0.24473699377200 | 0.22826508400100 | T | T | T |
| 0.74788733027000 | 0.24473699377300 | 0.56159841733400 | T | T | T |
| 0.74788733027000 | 0.24473699377200 | 0.89493175066700 | T | T | T |
| 0.08364316313700 | 0.24826592772200 | 0.12017573306600 | T | T | T |

|                  |                  |                  |   |   |   |
|------------------|------------------|------------------|---|---|---|
| 0.08364316313720 | 0.24826592772200 | 0.45350906639900 | T | T | T |
| 0.08364316313700 | 0.24826592772200 | 0.78684239973300 | T | T | T |
| 0.41697649647000 | 0.24826592772200 | 0.12017573306600 | T | T | T |
| 0.41697649647100 | 0.24826592772200 | 0.45350906639900 | T | T | T |
| 0.41697649647100 | 0.24826592772200 | 0.78684239973300 | T | T | T |
| 0.75030982980400 | 0.24826592772200 | 0.12017573306600 | T | T | T |
| 0.75030982980400 | 0.24826592772100 | 0.45350906639900 | T | T | T |
| 0.75030982980400 | 0.24826592772100 | 0.78684239973200 | T | T | T |
| 0.24987192369300 | 0.24489206640300 | 0.00768271319582 | T | T | T |
| 0.24987192369300 | 0.24489206640300 | 0.34101604652900 | T | T | T |
| 0.24987192369300 | 0.24489206640400 | 0.67434937986300 | T | T | T |
| 0.58320525702600 | 0.24489206640300 | 0.00768271319578 | T | T | T |
| 0.58320525702600 | 0.24489206640300 | 0.34101604652900 | T | T | T |
| 0.58320525702600 | 0.24489206640400 | 0.67434937986300 | T | T | T |
| 0.91653859036000 | 0.24489206640300 | 0.00768271319589 | T | T | T |
| 0.91653859036000 | 0.24489206640300 | 0.34101604652900 | T | T | T |
| 0.91653859036000 | 0.24489206640300 | 0.67434937986300 | T | T | T |
| 0.25008846605900 | 0.24484512424800 | 0.22978882072700 | T | T | T |
| 0.25008846605900 | 0.24484512424700 | 0.56312215406100 | T | T | T |
| 0.25008846605900 | 0.24484512424700 | 0.89645548739300 | T | T | T |
| 0.58342179939200 | 0.24484512424700 | 0.22978882072600 | T | T | T |
| 0.58342179939200 | 0.24484512424700 | 0.56312215406000 | T | T | T |
| 0.58342179939200 | 0.24484512424700 | 0.89645548739300 | T | T | T |
| 0.91675513272600 | 0.24484512424700 | 0.22978882072700 | T | T | T |
| 0.91675513272600 | 0.24484512424600 | 0.56312215406100 | T | T | T |
| 0.91675513272500 | 0.24484512424700 | 0.89645548739300 | T | T | T |
| 0.25445896855700 | 0.24452042247200 | 0.11567076026000 | T | T | T |
| 0.25445896855700 | 0.24452042247100 | 0.44900409359300 | T | T | T |
| 0.25445896855700 | 0.24452042247200 | 0.78233742692700 | T | T | T |
| 0.58779230189000 | 0.24452042247200 | 0.11567076026000 | T | T | T |

|                  |                  |                  |   |   |   |
|------------------|------------------|------------------|---|---|---|
| 0.58779230189000 | 0.24452042247100 | 0.44900409359300 | T | T | T |
| 0.58779230189000 | 0.24452042247200 | 0.78233742692700 | T | T | T |
| 0.92112563522300 | 0.24452042247200 | 0.11567076026000 | T | T | T |
| 0.92112563522300 | 0.24452042247100 | 0.44900409359300 | T | T | T |
| 0.92112563522300 | 0.24452042247100 | 0.78233742692700 | T | T | T |
| 0.12461897632600 | 0.99532690096000 | 0.03143091184340 | T | T | T |
| 0.12461897632600 | 0.99532690096000 | 0.36476424517700 | T | T | T |
| 0.12461897632600 | 0.99532690096000 | 0.69809757851000 | T | T | T |
| 0.45795230965900 | 0.99532690096000 | 0.03143091184330 | T | T | T |
| 0.45795230965900 | 0.99532690096000 | 0.36476424517600 | T | T | T |
| 0.45795230965900 | 0.99532690096000 | 0.69809757851000 | T | T | T |
| 0.79128564299200 | 0.99532690096100 | 0.03143091184310 | T | T | T |
| 0.79128564299300 | 0.99532690096100 | 0.36476424517600 | T | T | T |
| 0.79128564299300 | 0.99532690096000 | 0.69809757851000 | T | T | T |
| 0.12320469554800 | 0.99860379762800 | 0.25193576190000 | T | T | T |
| 0.12320469554800 | 0.99860379762900 | 0.58526909523300 | T | T | T |
| 0.12320469554800 | 0.99860379762900 | 0.91860242856600 | T | T | T |
| 0.45653802888100 | 0.99860379762900 | 0.25193576190000 | T | T | T |
| 0.45653802888200 | 0.99860379762900 | 0.58526909523300 | T | T | T |
| 0.45653802888200 | 0.99860379762900 | 0.91860242856600 | T | T | T |
| 0.78987136221400 | 0.99860379762800 | 0.25193576190000 | T | T | T |
| 0.78987136221400 | 0.99860379762900 | 0.58526909523300 | T | T | T |
| 0.78987136221400 | 0.99860379762900 | 0.91860242856600 | T | T | T |
| 0.12555892171400 | 0.99521988367200 | 0.14191580016100 | T | T | T |
| 0.12555892171400 | 0.99521988367200 | 0.47524913349400 | T | T | T |
| 0.12555892171400 | 0.99521988367200 | 0.80858246682800 | T | T | T |
| 0.45889225504700 | 0.99521988367200 | 0.14191580016100 | T | T | T |
| 0.45889225504700 | 0.99521988367200 | 0.47524913349500 | T | T | T |
| 0.45889225504700 | 0.99521988367200 | 0.80858246682800 | T | T | T |
| 0.79222558838000 | 0.99521988367200 | 0.14191580016100 | T | T | T |

|                  |                  |                  |   |   |   |
|------------------|------------------|------------------|---|---|---|
| 0.79222558838000 | 0.99521988367200 | 0.47524913349400 | T | T | T |
| 0.79222558838000 | 0.99521988367200 | 0.80858246682800 | T | T | T |
| 0.29197791754400 | 0.99570105809900 | 0.03050990434360 | T | T | T |
| 0.29197791754500 | 0.99570105809900 | 0.36384323767700 | T | T | T |
| 0.29197791754500 | 0.99570105809800 | 0.69717657101000 | T | T | T |
| 0.62531125087800 | 0.99570105809800 | 0.03050990434370 | T | T | T |
| 0.62531125087800 | 0.99570105809900 | 0.36384323767700 | T | T | T |
| 0.62531125087800 | 0.99570105809800 | 0.69717657101000 | T | T | T |
| 0.95864458421100 | 0.99570105809800 | 0.03050990434360 | T | T | T |
| 0.95864458421100 | 0.99570105809900 | 0.36384323767700 | T | T | T |
| 0.95864458421100 | 0.99570105809800 | 0.69717657101000 | T | T | T |
| 0.29098802704200 | 0.99504717499500 | 0.25357027746100 | T | T | T |
| 0.29098802704200 | 0.99504717499500 | 0.58690361079300 | T | T | T |
| 0.29098802704200 | 0.99504717499500 | 0.92023694412700 | T | T | T |
| 0.62432136037500 | 0.99504717499500 | 0.25357027746100 | T | T | T |
| 0.62432136037500 | 0.99504717499500 | 0.58690361079400 | T | T | T |
| 0.62432136037500 | 0.99504717499500 | 0.92023694412700 | T | T | T |
| 0.95765469370800 | 0.99504717499500 | 0.25357027746100 | T | T | T |
| 0.95765469370800 | 0.99504717499500 | 0.58690361079300 | T | T | T |
| 0.95765469370800 | 0.99504717499500 | 0.92023694412700 | T | T | T |
| 0.29296345093600 | 0.99573518716900 | 0.14126096426200 | T | T | T |
| 0.29296345093600 | 0.99573518716900 | 0.47459429759600 | T | T | T |
| 0.29296345093600 | 0.99573518716900 | 0.80792763092900 | T | T | T |
| 0.62629678426900 | 0.99573518716900 | 0.14126096426200 | T | T | T |
| 0.62629678426900 | 0.99573518716900 | 0.47459429759600 | T | T | T |
| 0.62629678426900 | 0.99573518716900 | 0.80792763092900 | T | T | T |
| 0.95963011760300 | 0.99573518716900 | 0.14126096426200 | T | T | T |
| 0.95963011760300 | 0.99573518716900 | 0.47459429759600 | T | T | T |
| 0.95963011760300 | 0.99573518716900 | 0.80792763092900 | T | T | T |
| 0.04200821538230 | 0.99539619382600 | 0.03089127402780 | T | T | T |



|                  |                  |                  |   |   |   |
|------------------|------------------|------------------|---|---|---|
| 0.04200821538230 | 0.99539619382600 | 0.36422460736100 | T | T | T |
| 0.04200821538230 | 0.99539619382500 | 0.69755794069400 | T | T | T |
| 0.37534154871600 | 0.99539619382600 | 0.03089127402790 | T | T | T |
| 0.37534154871600 | 0.99539619382600 | 0.36422460736100 | T | T | T |
| 0.37534154871600 | 0.99539619382600 | 0.69755794069400 | T | T | T |
| 0.70867488204900 | 0.99539619382600 | 0.03089127402790 | T | T | T |
| 0.70867488204900 | 0.99539619382500 | 0.36422460736100 | T | T | T |
| 0.70867488204900 | 0.99539619382500 | 0.69755794069400 | T | T | T |
| 0.04069334203280 | 0.99495709455600 | 0.25287376360100 | T | T | T |
| 0.04069334203280 | 0.99495709455600 | 0.58620709693400 | T | T | T |
| 0.04069334203290 | 0.99495709455500 | 0.91954043026800 | T | T | T |
| 0.37402667536700 | 0.99495709455600 | 0.25287376360100 | T | T | T |
| 0.37402667536600 | 0.99495709455600 | 0.58620709693400 | T | T | T |
| 0.37402667536700 | 0.99495709455500 | 0.91954043026800 | T | T | T |
| 0.70736000870000 | 0.99495709455600 | 0.25287376360100 | T | T | T |
| 0.70736000870000 | 0.99495709455600 | 0.58620709693400 | T | T | T |
| 0.70736000870000 | 0.99495709455500 | 0.91954043026800 | T | T | T |
| 0.04128323742840 | 0.99519042104500 | 0.14219599465900 | T | T | T |
| 0.04128323742860 | 0.99519042104600 | 0.47552932799300 | T | T | T |
| 0.04128323742830 | 0.99519042104600 | 0.80886266132600 | T | T | T |
| 0.37461657076200 | 0.99519042104600 | 0.14219599465900 | T | T | T |
| 0.37461657076200 | 0.99519042104600 | 0.47552932799300 | T | T | T |
| 0.37461657076200 | 0.99519042104600 | 0.80886266132600 | T | T | T |
| 0.70794990409500 | 0.99519042104600 | 0.14219599465900 | T | T | T |
| 0.70794990409500 | 0.99519042104600 | 0.47552932799300 | T | T | T |
| 0.70794990409500 | 0.99519042104600 | 0.80886266132600 | T | T | T |
| 0.20841413963400 | 0.99529522640900 | 0.03100634585890 | T | T | T |
| 0.20841413963400 | 0.99529522640900 | 0.36433967919200 | T | T | T |
| 0.20841413963400 | 0.99529522640900 | 0.69767301252600 | T | T | T |
| 0.54174747296700 | 0.99529522640900 | 0.03100634585890 | T | T | T |

|                  |                  |                  |   |   |   |
|------------------|------------------|------------------|---|---|---|
| 0.54174747296700 | 0.99529522640900 | 0.36433967919200 | T | T | T |
| 0.54174747296700 | 0.99529522640900 | 0.69767301252600 | T | T | T |
| 0.87508080630100 | 0.99529522640900 | 0.03100634585910 | T | T | T |
| 0.87508080630000 | 0.99529522640900 | 0.36433967919200 | T | T | T |
| 0.87508080630000 | 0.99529522640900 | 0.69767301252600 | T | T | T |
| 0.20656801205800 | 0.99741048624400 | 0.25126170889900 | T | T | T |
| 0.20656801205800 | 0.99741048624400 | 0.58459504223200 | T | T | T |
| 0.20656801205800 | 0.99741048624400 | 0.91792837556500 | T | T | T |
| 0.53990134539200 | 0.99741048624400 | 0.25126170889900 | T | T | T |
| 0.53990134539200 | 0.99741048624400 | 0.58459504223200 | T | T | T |
| 0.53990134539200 | 0.99741048624400 | 0.91792837556500 | T | T | T |
| 0.87323467872500 | 0.99741048624400 | 0.25126170889900 | T | T | T |
| 0.87323467872500 | 0.99741048624400 | 0.58459504223200 | T | T | T |
| 0.87323467872500 | 0.99741048624400 | 0.91792837556500 | T | T | T |
| 0.20894956716700 | 0.00624797452630 | 0.13553829938600 | T | T | T |
| 0.20894956716700 | 0.00624797452608 | 0.46887163271900 | T | T | T |
| 0.20894956716700 | 0.00624797452669 | 0.80220496605200 | T | T | T |
| 0.54228290050000 | 0.00624797452621 | 0.13553829938500 | T | T | T |
| 0.54228290050000 | 0.00624797452600 | 0.46887163271900 | T | T | T |
| 0.54228290050000 | 0.00624797452659 | 0.80220496605200 | T | T | T |
| 0.87561623383400 | 0.00624797452673 | 0.13553829938600 | T | T | T |
| 0.87561623383400 | 0.00624797452649 | 0.46887163271900 | T | T | T |
| 0.87561623383400 | 0.00624797452712 | 0.80220496605200 | T | T | T |
| 0.00063287283332 | 0.06678357362580 | 0.08240540583640 | T | T | T |
| 0.00063287283346 | 0.06678357362490 | 0.41573873916900 | T | T | T |
| 0.00063287283325 | 0.06678357362520 | 0.74907207250300 | T | T | T |
| 0.33396620616600 | 0.06678357362550 | 0.08240540583640 | T | T | T |
| 0.33396620616600 | 0.06678357362460 | 0.41573873917000 | T | T | T |
| 0.33396620616600 | 0.06678357362490 | 0.74907207250300 | T | T | T |
| 0.66729953950100 | 0.06678357362580 | 0.08240540583650 | T | T | T |

|                  |                  |                  |   |   |   |
|------------------|------------------|------------------|---|---|---|
| 0.66729953950100 | 0.06678357362500 | 0.41573873917000 | T | T | T |
| 0.66729953950100 | 0.06678357362520 | 0.74907207250300 | T | T | T |
| 0.00025621243033 | 0.06635071463410 | 0.30500393101400 | T | T | T |
| 0.00025621243022 | 0.06635071462890 | 0.63833726434600 | T | T | T |
| 0.00025621243029 | 0.06635071463110 | 0.97167059768000 | T | T | T |
| 0.33358954576300 | 0.06635071463410 | 0.30500393101400 | T | T | T |
| 0.33358954576300 | 0.06635071462900 | 0.63833726434600 | T | T | T |
| 0.33358954576300 | 0.06635071463120 | 0.97167059768000 | T | T | T |
| 0.66692287909800 | 0.06635071463420 | 0.30500393101400 | T | T | T |
| 0.66692287909800 | 0.06635071462920 | 0.63833726434600 | T | T | T |
| 0.66692287909800 | 0.06635071463140 | 0.97167059768000 | T | T | T |
| 0.33314758271200 | 0.06629227672500 | 0.19408416500700 | T | T | T |
| 0.33314758271200 | 0.06629227672550 | 0.52741749834000 | T | T | T |
| 0.33314758271200 | 0.06629227672580 | 0.86075083167400 | T | T | T |
| 0.66648091604700 | 0.06629227672500 | 0.19408416500600 | T | T | T |
| 0.66648091604700 | 0.06629227672550 | 0.52741749834000 | T | T | T |
| 0.66648091604700 | 0.06629227672580 | 0.86075083167300 | T | T | T |
| 0.99981424937900 | 0.06629227672490 | 0.19408416500700 | T | T | T |
| 0.99981424937900 | 0.06629227672540 | 0.52741749834000 | T | T | T |
| 0.99981424937900 | 0.06629227672570 | 0.86075083167400 | T | T | T |
| 0.16698756538900 | 0.06316021983710 | 0.08558908010490 | T | T | T |
| 0.16698756538900 | 0.06316021983660 | 0.41892241343800 | T | T | T |
| 0.16698756538900 | 0.06316021983660 | 0.75225574677100 | T | T | T |
| 0.50032089872300 | 0.06316021983730 | 0.08558908010500 | T | T | T |
| 0.50032089872300 | 0.06316021983670 | 0.41892241343800 | T | T | T |
| 0.50032089872200 | 0.06316021983670 | 0.75225574677100 | T | T | T |
| 0.83365423205500 | 0.06316021983720 | 0.08558908010480 | T | T | T |
| 0.83365423205500 | 0.06316021983670 | 0.41892241343800 | T | T | T |
| 0.83365423205500 | 0.06316021983670 | 0.75225574677100 | T | T | T |
| 0.16640094375200 | 0.06567691441980 | 0.30554963368900 | T | T | T |

|                  |                  |                  |   |   |   |
|------------------|------------------|------------------|---|---|---|
| 0.16640094375200 | 0.06567691441480 | 0.63888296702100 | T | T | T |
| 0.16640094375200 | 0.06567691441700 | 0.97221630035500 | T | T | T |
| 0.49973427708600 | 0.06567691442010 | 0.30554963368800 | T | T | T |
| 0.49973427708600 | 0.06567691441510 | 0.63888296702100 | T | T | T |
| 0.49973427708600 | 0.06567691441730 | 0.97221630035500 | T | T | T |
| 0.83306761041800 | 0.06567691442000 | 0.30554963368800 | T | T | T |
| 0.83306761041900 | 0.06567691441510 | 0.63888296702100 | T | T | T |
| 0.83306761041900 | 0.06567691441730 | 0.97221630035500 | T | T | T |
| 0.16571358178100 | 0.06813207358970 | 0.19341662512000 | T | T | T |
| 0.16571358178100 | 0.06813207359010 | 0.52674995845400 | T | T | T |
| 0.16571358178100 | 0.06813207359070 | 0.86008329178700 | T | T | T |
| 0.49904691511400 | 0.06813207358980 | 0.19341662512000 | T | T | T |
| 0.49904691511400 | 0.06813207359030 | 0.52674995845400 | T | T | T |
| 0.49904691511400 | 0.06813207359080 | 0.86008329178700 | T | T | T |
| 0.83238024844700 | 0.06813207358950 | 0.19341662512100 | T | T | T |
| 0.83238024844800 | 0.06813207358990 | 0.52674995845400 | T | T | T |
| 0.83238024844800 | 0.06813207359050 | 0.86008329178800 | T | T | T |
| 0.08433595828290 | 0.06572182449210 | 0.08338774240500 | T | T | T |
| 0.08433595828280 | 0.06572182449170 | 0.41672107573800 | T | T | T |
| 0.08433595828300 | 0.06572182449150 | 0.75005440907200 | T | T | T |
| 0.41766929161600 | 0.06572182449240 | 0.08338774240480 | T | T | T |
| 0.41766929161600 | 0.06572182449200 | 0.41672107573800 | T | T | T |
| 0.41766929161700 | 0.06572182449180 | 0.75005440907100 | T | T | T |
| 0.75100262495000 | 0.06572182449230 | 0.08338774240500 | T | T | T |
| 0.75100262494900 | 0.06572182449190 | 0.41672107573800 | T | T | T |
| 0.75100262495000 | 0.06572182449170 | 0.75005440907200 | T | T | T |
| 0.08301267865360 | 0.06644192975040 | 0.30488740733900 | T | T | T |
| 0.08301267865360 | 0.06644192974550 | 0.63822074067100 | T | T | T |
| 0.08301267865340 | 0.06644192974780 | 0.97155407400500 | T | T | T |
| 0.41634601198700 | 0.06644192975050 | 0.30488740733900 | T | T | T |

|                  |                  |                  |   |   |   |
|------------------|------------------|------------------|---|---|---|
| 0.41634601198700 | 0.06644192974560 | 0.63822074067100 | T | T | T |
| 0.41634601198700 | 0.06644192974790 | 0.97155407400500 | T | T | T |
| 0.74967934532000 | 0.06644192975040 | 0.30488740733900 | T | T | T |
| 0.74967934532000 | 0.06644192974550 | 0.63822074067100 | T | T | T |
| 0.74967934532000 | 0.06644192974780 | 0.97155407400500 | T | T | T |
| 0.08356199313840 | 0.06717904270820 | 0.19329874536400 | T | T | T |
| 0.08356199313840 | 0.06717904270840 | 0.52663207869800 | T | T | T |
| 0.08356199313840 | 0.06717904270880 | 0.85996541203200 | T | T | T |
| 0.41689532647200 | 0.06717904270830 | 0.19329874536500 | T | T | T |
| 0.41689532647200 | 0.06717904270840 | 0.52663207869800 | T | T | T |
| 0.41689532647200 | 0.06717904270890 | 0.85996541203200 | T | T | T |
| 0.75022865980600 | 0.06717904270840 | 0.19329874536400 | T | T | T |
| 0.75022865980600 | 0.06717904270860 | 0.52663207869800 | T | T | T |
| 0.75022865980500 | 0.06717904270910 | 0.85996541203100 | T | T | T |
| 0.25000030179900 | 0.06853169531820 | 0.08113647071490 | T | T | T |
| 0.25000030179900 | 0.06853169531730 | 0.41446980404800 | T | T | T |
| 0.25000030179900 | 0.06853169531770 | 0.74780313738100 | T | T | T |
| 0.58333363513200 | 0.06853169531800 | 0.08113647071500 | T | T | T |
| 0.58333363513200 | 0.06853169531710 | 0.41446980404800 | T | T | T |
| 0.58333363513200 | 0.06853169531750 | 0.74780313738200 | T | T | T |
| 0.91666696846500 | 0.06853169531810 | 0.08113647071500 | T | T | T |
| 0.91666696846500 | 0.06853169531710 | 0.41446980404800 | T | T | T |
| 0.91666696846500 | 0.06853169531760 | 0.74780313738200 | T | T | T |
| 0.24995362708900 | 0.06622264500960 | 0.30496030962400 | T | T | T |
| 0.24995362708900 | 0.06622264500420 | 0.63829364295700 | T | T | T |
| 0.24995362709000 | 0.06622264500690 | 0.97162697629100 | T | T | T |
| 0.58328696042300 | 0.06622264500960 | 0.30496030962400 | T | T | T |
| 0.58328696042300 | 0.06622264500410 | 0.63829364295700 | T | T | T |
| 0.58328696042300 | 0.06622264500680 | 0.97162697629100 | T | T | T |
| 0.91662029375600 | 0.06622264500980 | 0.30496030962400 | T | T | T |

|                  |                  |                  |   |   |   |
|------------------|------------------|------------------|---|---|---|
| 0.91662029375600 | 0.06622264500430 | 0.63829364295700 | T | T | T |
| 0.91662029375600 | 0.06622264500700 | 0.97162697629100 | T | T | T |
| 0.25024338602600 | 0.06624871683550 | 0.19405143133500 | T | T | T |
| 0.25024338602600 | 0.06624871683590 | 0.52738476466800 | T | T | T |
| 0.25024338602600 | 0.06624871683640 | 0.86071809800200 | T | T | T |
| 0.58357671936000 | 0.06624871683550 | 0.19405143133500 | T | T | T |
| 0.58357671935900 | 0.06624871683600 | 0.52738476466800 | T | T | T |
| 0.58357671936000 | 0.06624871683640 | 0.86071809800200 | T | T | T |
| 0.91691005269300 | 0.06624871683570 | 0.19405143133500 | T | T | T |
| 0.91691005269300 | 0.06624871683620 | 0.52738476466800 | T | T | T |
| 0.91691005269300 | 0.06624871683660 | 0.86071809800200 | T | T | T |
| 0.04166666667330 | 0.13043999673400 | 0.02777666599470 | F | F | F |
| 0.04166666667330 | 0.13043999673400 | 0.36110999932900 | F | F | F |
| 0.04166666667330 | 0.13043999673400 | 0.69444333266100 | F | F | F |
| 0.37500000000700 | 0.13043999673400 | 0.02777666599470 | F | F | F |
| 0.37500000000700 | 0.13043999673400 | 0.36110999932900 | F | F | F |
| 0.37500000000700 | 0.13043999673400 | 0.69444333266100 | F | F | F |
| 0.70833333334100 | 0.13043999673400 | 0.02777666599470 | F | F | F |
| 0.70833333334100 | 0.13043999673400 | 0.36110999932900 | F | F | F |
| 0.70833333334100 | 0.13043999673400 | 0.69444333266100 | F | F | F |
| 0.04166666667330 | 0.13043999673400 | 0.2499999994900  | F | F | F |
| 0.04166666667330 | 0.13043999673400 | 0.58333333328300 | F | F | F |
| 0.04166666667330 | 0.13043999673400 | 0.9166666661700  | F | F | F |
| 0.37500000000700 | 0.13043999673400 | 0.2499999994900  | F | F | F |
| 0.37500000000700 | 0.13043999673400 | 0.58333333328300 | F | F | F |
| 0.37500000000700 | 0.13043999673400 | 0.9166666661700  | F | F | F |
| 0.70833333334100 | 0.13043999673400 | 0.2499999994900  | F | F | F |
| 0.70833333334100 | 0.13043999673400 | 0.58333333328300 | F | F | F |
| 0.70833333334100 | 0.13043999673400 | 0.9166666661700  | F | F | F |
| 0.04166666667330 | 0.13043999673400 | 0.13888999819000 | F | F | F |

|                  |                  |                  |   |   |   |
|------------------|------------------|------------------|---|---|---|
| 0.04166666667330 | 0.13043999673400 | 0.47222333152400 | F | F | F |
| 0.04166666667330 | 0.13043999673400 | 0.80555666485600 | F | F | F |
| 0.37500000000700 | 0.13043999673400 | 0.13888999819000 | F | F | F |
| 0.37500000000700 | 0.13043999673400 | 0.47222333152400 | F | F | F |
| 0.37500000000700 | 0.13043999673400 | 0.80555666485600 | F | F | F |
| 0.70833333334100 | 0.13043999673400 | 0.13888999819000 | F | F | F |
| 0.70833333334100 | 0.13043999673400 | 0.47222333152400 | F | F | F |
| 0.70833333334100 | 0.13043999673400 | 0.80555666485600 | F | F | F |
| 0.20833333332800 | 0.13043999673400 | 0.02777666599470 | F | F | F |
| 0.20833333332800 | 0.13043999673400 | 0.36110999932900 | F | F | F |
| 0.20833333332800 | 0.13043999673400 | 0.69444333266100 | F | F | F |
| 0.54166666666100 | 0.13043999673400 | 0.02777666599470 | F | F | F |
| 0.54166666666100 | 0.13043999673400 | 0.36110999932900 | F | F | F |
| 0.54166666666100 | 0.13043999673400 | 0.69444333266100 | F | F | F |
| 0.8749999999500  | 0.13043999673400 | 0.02777666599470 | F | F | F |
| 0.8749999999500  | 0.13043999673400 | 0.36110999932900 | F | F | F |
| 0.8749999999500  | 0.13043999673400 | 0.69444333266100 | F | F | F |
| 0.20833333332800 | 0.13043999673400 | 0.2499999994900  | F | F | F |
| 0.20833333332800 | 0.13043999673400 | 0.5833333328300  | F | F | F |
| 0.20833333332800 | 0.13043999673400 | 0.9166666661700  | F | F | F |
| 0.54166666666100 | 0.13043999673400 | 0.2499999994900  | F | F | F |
| 0.54166666666100 | 0.13043999673400 | 0.5833333328300  | F | F | F |
| 0.54166666666100 | 0.13043999673400 | 0.9166666661700  | F | F | F |
| 0.8749999999500  | 0.13043999673400 | 0.2499999994900  | F | F | F |
| 0.8749999999500  | 0.13043999673400 | 0.5833333328300  | F | F | F |
| 0.8749999999500  | 0.13043999673400 | 0.9166666661700  | F | F | F |
| 0.20833333332800 | 0.13043999673400 | 0.13888999819000 | F | F | F |
| 0.20833333332800 | 0.13043999673400 | 0.47222333152400 | F | F | F |
| 0.20833333332800 | 0.13043999673400 | 0.80555666485600 | F | F | F |
| 0.54166666666100 | 0.13043999673400 | 0.13888999819000 | F | F | F |

|                  |                  |                  |   |   |   |
|------------------|------------------|------------------|---|---|---|
| 0.54166666666100 | 0.13043999673400 | 0.47222333152400 | F | F | F |
| 0.54166666666100 | 0.13043999673400 | 0.80555666485600 | F | F | F |
| 0.87499999999500 | 0.13043999673400 | 0.13888999819000 | F | F | F |
| 0.87499999999500 | 0.13043999673400 | 0.47222333152400 | F | F | F |
| 0.87499999999500 | 0.13043999673400 | 0.80555666485600 | F | F | F |
| 0.12500000000200 | 0.13043999673400 | 0.02777666599470 | F | F | F |
| 0.12500000000200 | 0.13043999673400 | 0.36110999932900 | F | F | F |
| 0.12500000000200 | 0.13043999673400 | 0.69444333266100 | F | F | F |
| 0.45833333333400 | 0.13043999673400 | 0.02777666599470 | F | F | F |
| 0.45833333333400 | 0.13043999673400 | 0.36110999932900 | F | F | F |
| 0.45833333333400 | 0.13043999673400 | 0.69444333266100 | F | F | F |
| 0.79166666666800 | 0.13043999673400 | 0.02777666599470 | F | F | F |
| 0.79166666666800 | 0.13043999673400 | 0.36110999932900 | F | F | F |
| 0.79166666666800 | 0.13043999673400 | 0.69444333266100 | F | F | F |
| 0.12500000000200 | 0.13043999673400 | 0.2499999994900  | F | F | F |
| 0.12500000000200 | 0.13043999673400 | 0.5833333328300  | F | F | F |
| 0.12500000000200 | 0.13043999673400 | 0.9166666661700  | F | F | F |
| 0.45833333333400 | 0.13043999673400 | 0.2499999994900  | F | F | F |
| 0.45833333333400 | 0.13043999673400 | 0.5833333328300  | F | F | F |
| 0.45833333333400 | 0.13043999673400 | 0.9166666661700  | F | F | F |
| 0.79166666666800 | 0.13043999673400 | 0.2499999994900  | F | F | F |
| 0.79166666666800 | 0.13043999673400 | 0.5833333328300  | F | F | F |
| 0.79166666666800 | 0.13043999673400 | 0.9166666661700  | F | F | F |
| 0.12500000000200 | 0.13043999673400 | 0.13888999819000 | F | F | F |
| 0.12500000000200 | 0.13043999673400 | 0.47222333152400 | F | F | F |
| 0.12500000000200 | 0.13043999673400 | 0.80555666485600 | F | F | F |
| 0.45833333333400 | 0.13043999673400 | 0.13888999819000 | F | F | F |
| 0.45833333333400 | 0.13043999673400 | 0.47222333152400 | F | F | F |
| 0.45833333333400 | 0.13043999673400 | 0.80555666485600 | F | F | F |
| 0.79166666666800 | 0.13043999673400 | 0.13888999819000 | F | F | F |



|                  |                  |                  |   |   |   |
|------------------|------------------|------------------|---|---|---|
| 0.79166666666800 | 0.13043999673400 | 0.47222333152400 | F | F | F |
| 0.79166666666800 | 0.13043999673400 | 0.80555666485600 | F | F | F |
| 0.29166666666900 | 0.13043999673400 | 0.02777666599470 | F | F | F |
| 0.29166666666900 | 0.13043999673400 | 0.36110999932900 | F | F | F |
| 0.29166666666900 | 0.13043999673400 | 0.69444333266100 | F | F | F |
| 0.62500000003100 | 0.13043999673400 | 0.02777666599470 | F | F | F |
| 0.62500000003100 | 0.13043999673400 | 0.36110999932900 | F | F | F |
| 0.62500000003100 | 0.13043999673400 | 0.69444333266100 | F | F | F |
| 0.95833333336500 | 0.13043999673400 | 0.02777666599470 | F | F | F |
| 0.95833333336500 | 0.13043999673400 | 0.36110999932900 | F | F | F |
| 0.95833333336500 | 0.13043999673400 | 0.69444333266100 | F | F | F |
| 0.29166666666900 | 0.13043999673400 | 0.24999999994900 | F | F | F |
| 0.29166666666900 | 0.13043999673400 | 0.58333333328300 | F | F | F |
| 0.29166666666900 | 0.13043999673400 | 0.91666666617000 | F | F | F |
| 0.62500000003100 | 0.13043999673400 | 0.24999999994900 | F | F | F |
| 0.62500000003100 | 0.13043999673400 | 0.58333333328300 | F | F | F |
| 0.62500000003100 | 0.13043999673400 | 0.91666666617000 | F | F | F |
| 0.95833333336500 | 0.13043999673400 | 0.24999999994900 | F | F | F |
| 0.95833333336500 | 0.13043999673400 | 0.58333333328300 | F | F | F |
| 0.95833333336500 | 0.13043999673400 | 0.91666666617000 | F | F | F |
| 0.29166666666900 | 0.13043999673400 | 0.13888999819000 | F | F | F |
| 0.29166666666900 | 0.13043999673400 | 0.47222333152400 | F | F | F |
| 0.29166666666900 | 0.13043999673400 | 0.80555666485600 | F | F | F |
| 0.62500000003100 | 0.13043999673400 | 0.13888999819000 | F | F | F |
| 0.62500000003100 | 0.13043999673400 | 0.47222333152400 | F | F | F |
| 0.62500000003100 | 0.13043999673400 | 0.80555666485600 | F | F | F |
| 0.95833333336500 | 0.13043999673400 | 0.13888999819000 | F | F | F |
| 0.95833333336500 | 0.13043999673400 | 0.47222333152400 | F | F | F |
| 0.95833333336500 | 0.13043999673400 | 0.80555666485600 | F | F | F |
| 0.00056089518631 | 0.19404418764300 | 0.08244091285990 | T | T | T |

|                  |                  |                  |   |   |   |
|------------------|------------------|------------------|---|---|---|
| 0.00056089518629 | 0.19404418764300 | 0.41577424619300 | T | T | T |
| 0.00056089518600 | 0.19404418764300 | 0.74910757952600 | T | T | T |
| 0.33389422851900 | 0.19404418764300 | 0.08244091286020 | T | T | T |
| 0.33389422851900 | 0.19404418764300 | 0.41577424619300 | T | T | T |
| 0.33389422851900 | 0.19404418764300 | 0.74910757952700 | T | T | T |
| 0.66722756185400 | 0.19404418764300 | 0.08244091286020 | T | T | T |
| 0.66722756185400 | 0.19404418764300 | 0.41577424619300 | T | T | T |
| 0.66722756185300 | 0.19404418764300 | 0.74910757952700 | T | T | T |
| 0.00026419168548 | 0.19440395888100 | 0.30500012441100 | T | T | T |
| 0.00026419168554 | 0.19440395888700 | 0.63833345774300 | T | T | T |
| 0.00026419168538 | 0.19440395888400 | 0.97166679107700 | T | T | T |
| 0.33359752501900 | 0.19440395888100 | 0.30500012441000 | T | T | T |
| 0.33359752501900 | 0.19440395888600 | 0.63833345774300 | T | T | T |
| 0.33359752501800 | 0.19440395888400 | 0.97166679107700 | T | T | T |
| 0.66693085835300 | 0.19440395888100 | 0.30500012441000 | T | T | T |
| 0.66693085835300 | 0.19440395888600 | 0.63833345774300 | T | T | T |
| 0.66693085835200 | 0.19440395888400 | 0.97166679107700 | T | T | T |
| 0.33317305420200 | 0.19445879708000 | 0.19399617293300 | T | T | T |
| 0.33317305420200 | 0.19445879708000 | 0.52732950626600 | T | T | T |
| 0.33317305420200 | 0.19445879707900 | 0.86066283960000 | T | T | T |
| 0.66650638753600 | 0.19445879708000 | 0.19399617293300 | T | T | T |
| 0.66650638753700 | 0.19445879708000 | 0.52732950626700 | T | T | T |
| 0.66650638753700 | 0.19445879708000 | 0.86066283960000 | T | T | T |
| 0.99983972086900 | 0.19445879708000 | 0.19399617293300 | T | T | T |
| 0.99983972086900 | 0.19445879708000 | 0.52732950626700 | T | T | T |
| 0.99983972086900 | 0.19445879708000 | 0.86066283960000 | T | T | T |
| 0.16677796151800 | 0.19733872526600 | 0.08549655615390 | T | T | T |
| 0.16677796151800 | 0.19733872526500 | 0.41882988948700 | T | T | T |
| 0.16677796151800 | 0.19733872526600 | 0.75216322282000 | T | T | T |
| 0.50011129485100 | 0.19733872526600 | 0.08549655615380 | T | T | T |

|                  |                  |                  |   |   |   |
|------------------|------------------|------------------|---|---|---|
| 0.50011129485100 | 0.19733872526500 | 0.41882988948700 | T | T | T |
| 0.50011129485200 | 0.19733872526600 | 0.75216322282000 | T | T | T |
| 0.83344462818500 | 0.19733872526600 | 0.08549655615390 | T | T | T |
| 0.83344462818500 | 0.19733872526500 | 0.41882988948700 | T | T | T |
| 0.83344462818500 | 0.19733872526600 | 0.75216322282000 | T | T | T |
| 0.16642794138800 | 0.19518434331300 | 0.30553126488100 | T | T | T |
| 0.16642794138800 | 0.19518434331800 | 0.63886459821400 | T | T | T |
| 0.16642794138800 | 0.19518434331600 | 0.97219793154700 | T | T | T |
| 0.49976127472100 | 0.19518434331300 | 0.30553126488100 | T | T | T |
| 0.49976127472100 | 0.19518434331800 | 0.63886459821400 | T | T | T |
| 0.49976127472100 | 0.19518434331600 | 0.97219793154800 | T | T | T |
| 0.83309460805400 | 0.19518434331300 | 0.30553126488100 | T | T | T |
| 0.83309460805400 | 0.19518434331800 | 0.63886459821400 | T | T | T |
| 0.83309460805400 | 0.19518434331600 | 0.97219793154800 | T | T | T |
| 0.16610340494200 | 0.19334925994100 | 0.19300899234500 | T | T | T |
| 0.16610340494200 | 0.19334925994100 | 0.52634232567900 | T | T | T |
| 0.16610340494200 | 0.19334925994100 | 0.85967565901200 | T | T | T |
| 0.49943673827600 | 0.19334925994100 | 0.19300899234500 | T | T | T |
| 0.49943673827500 | 0.19334925994100 | 0.52634232567900 | T | T | T |
| 0.49943673827600 | 0.19334925994000 | 0.85967565901200 | T | T | T |
| 0.83277007160900 | 0.19334925994100 | 0.19300899234500 | T | T | T |
| 0.83277007160900 | 0.19334925994100 | 0.52634232567900 | T | T | T |
| 0.83277007160900 | 0.19334925994000 | 0.85967565901200 | T | T | T |
| 0.08368241765270 | 0.19575520708900 | 0.08403702365830 | T | T | T |
| 0.08368241765270 | 0.19575520708900 | 0.41737035699100 | T | T | T |
| 0.08368241765260 | 0.19575520708900 | 0.75070369032500 | T | T | T |
| 0.41701575098600 | 0.19575520708900 | 0.08403702365820 | T | T | T |
| 0.41701575098600 | 0.19575520708900 | 0.41737035699100 | T | T | T |
| 0.41701575098600 | 0.19575520708900 | 0.75070369032500 | T | T | T |
| 0.75034908432000 | 0.19575520708800 | 0.08403702365810 | T | T | T |

|                  |                  |                  |   |   |   |
|------------------|------------------|------------------|---|---|---|
| 0.75034908432000 | 0.19575520708900 | 0.41737035699100 | T | T | T |
| 0.75034908432000 | 0.19575520708800 | 0.75070369032500 | T | T | T |
| 0.08310402439590 | 0.19439310394500 | 0.30483048758200 | T | T | T |
| 0.08310402439580 | 0.19439310395000 | 0.63816382091500 | T | T | T |
| 0.08310402439600 | 0.19439310394800 | 0.97149715424800 | T | T | T |
| 0.41643735772900 | 0.19439310394500 | 0.30483048758200 | T | T | T |
| 0.41643735772900 | 0.19439310395100 | 0.63816382091500 | T | T | T |
| 0.41643735772900 | 0.19439310394800 | 0.97149715424800 | T | T | T |
| 0.74977069106300 | 0.19439310394600 | 0.30483048758200 | T | T | T |
| 0.74977069106300 | 0.19439310395100 | 0.63816382091500 | T | T | T |
| 0.74977069106300 | 0.19439310394800 | 0.97149715424800 | T | T | T |
| 0.08366502128910 | 0.19383354324000 | 0.19316090117500 | T | T | T |
| 0.08366502128900 | 0.19383354324000 | 0.52649423450900 | T | T | T |
| 0.08366502128900 | 0.19383354323900 | 0.85982756784200 | T | T | T |
| 0.41699835462300 | 0.19383354324000 | 0.19316090117500 | T | T | T |
| 0.41699835462200 | 0.19383354324000 | 0.52649423450900 | T | T | T |
| 0.41699835462200 | 0.19383354323900 | 0.85982756784200 | T | T | T |
| 0.75033168795600 | 0.19383354324000 | 0.19316090117500 | T | T | T |
| 0.75033168795600 | 0.19383354324000 | 0.52649423450900 | T | T | T |
| 0.75033168795600 | 0.19383354323900 | 0.85982756784200 | T | T | T |
| 0.24992055357300 | 0.19301222796500 | 0.08150920476590 | T | T | T |
| 0.24992055357300 | 0.19301222796500 | 0.41484253809900 | T | T | T |
| 0.24992055357300 | 0.19301222796500 | 0.74817587143200 | T | T | T |
| 0.58325388690700 | 0.19301222796500 | 0.08150920476600 | T | T | T |
| 0.58325388690700 | 0.19301222796500 | 0.41484253809900 | T | T | T |
| 0.58325388690700 | 0.19301222796500 | 0.74817587143200 | T | T | T |
| 0.91658722024000 | 0.19301222796500 | 0.08150920476610 | T | T | T |
| 0.91658722024000 | 0.19301222796500 | 0.41484253809900 | T | T | T |
| 0.91658722024000 | 0.19301222796500 | 0.74817587143200 | T | T | T |
| 0.24996552200600 | 0.19453833117000 | 0.30494596236800 | T | T | T |

|                  |                  |                  |   |   |   |
|------------------|------------------|------------------|---|---|---|
| 0.24996552200600 | 0.19453833117400 | 0.63827929570100 | T | T | T |
| 0.24996552200600 | 0.19453833117200 | 0.97161262903500 | T | T | T |
| 0.58329885534000 | 0.19453833117000 | 0.30494596236800 | T | T | T |
| 0.58329885534000 | 0.19453833117400 | 0.63827929570000 | T | T | T |
| 0.58329885534000 | 0.19453833117200 | 0.97161262903400 | T | T | T |
| 0.91663218867300 | 0.19453833117000 | 0.30494596236800 | T | T | T |
| 0.91663218867300 | 0.19453833117400 | 0.63827929570100 | T | T | T |
| 0.91663218867300 | 0.19453833117200 | 0.97161262903500 | T | T | T |
| 0.24996983850400 | 0.19473418803100 | 0.19370877275300 | T | T | T |
| 0.24996983850400 | 0.19473418803100 | 0.52704210608600 | T | T | T |
| 0.24996983850300 | 0.19473418803000 | 0.86037543941900 | T | T | T |
| 0.58330317183700 | 0.19473418803100 | 0.19370877275200 | T | T | T |
| 0.58330317183700 | 0.19473418803000 | 0.52704210608600 | T | T | T |
| 0.58330317183700 | 0.19473418803000 | 0.86037543941900 | T | T | T |
| 0.91663650517000 | 0.19473418803100 | 0.19370877275200 | T | T | T |
| 0.91663650517000 | 0.19473418803000 | 0.52704210608600 | T | T | T |
| 0.91663650517000 | 0.19473418803000 | 0.86037543941900 | T | T | T |
| 0.12442847690200 | 0.26492757233300 | 0.03172672031060 | T | T | T |
| 0.12442847690200 | 0.26492757233300 | 0.36506005364400 | T | T | T |
| 0.12442847690200 | 0.26492757233300 | 0.69839338697700 | T | T | T |
| 0.45776181023400 | 0.26492757233300 | 0.03172672031070 | T | T | T |
| 0.45776181023400 | 0.26492757233300 | 0.36506005364400 | T | T | T |
| 0.45776181023400 | 0.26492757233300 | 0.69839338697700 | T | T | T |
| 0.79109514356800 | 0.26492757233300 | 0.03172672031070 | T | T | T |
| 0.79109514356800 | 0.26492757233300 | 0.36506005364400 | T | T | T |
| 0.79109514356800 | 0.26492757233300 | 0.69839338697700 | T | T | T |
| 0.12376323633000 | 0.26209815689600 | 0.25150658995500 | T | T | T |
| 0.12376323632900 | 0.26209815689600 | 0.58483992328800 | T | T | T |
| 0.12376323633000 | 0.26209815689600 | 0.91817325662100 | T | T | T |
| 0.45709656966300 | 0.26209815689600 | 0.25150658995500 | T | T | T |

|                  |                  |                  |   |   |   |
|------------------|------------------|------------------|---|---|---|
| 0.45709656966300 | 0.26209815689500 | 0.58483992328800 | T | T | T |
| 0.45709656966300 | 0.26209815689600 | 0.91817325662100 | T | T | T |
| 0.79042990299600 | 0.26209815689500 | 0.25150658995500 | T | T | T |
| 0.79042990299600 | 0.26209815689500 | 0.58483992328800 | T | T | T |
| 0.79042990299600 | 0.26209815689500 | 0.91817325662100 | T | T | T |
| 0.12596968784800 | 0.26715994569900 | 0.14133133855100 | T | T | T |
| 0.12596968784800 | 0.26715994569900 | 0.47466467188300 | T | T | T |
| 0.12596968784800 | 0.26715994569900 | 0.80799800521700 | T | T | T |
| 0.45930302118100 | 0.26715994569900 | 0.14133133855100 | T | T | T |
| 0.45930302118200 | 0.26715994569900 | 0.47466467188300 | T | T | T |
| 0.45930302118200 | 0.26715994569900 | 0.80799800521700 | T | T | T |
| 0.79263635451500 | 0.26715994569900 | 0.14133133855100 | T | T | T |
| 0.79263635451500 | 0.26715994569900 | 0.47466467188300 | T | T | T |
| 0.79263635451500 | 0.26715994569900 | 0.80799800521700 | T | T | T |
| 0.29194652188400 | 0.26490997169600 | 0.03055272258520 | T | T | T |
| 0.29194652188400 | 0.26490997169600 | 0.36388605591800 | T | T | T |
| 0.29194652188400 | 0.26490997169600 | 0.69721938925100 | T | T | T |
| 0.62527985521700 | 0.26490997169600 | 0.03055272258530 | T | T | T |
| 0.62527985521700 | 0.26490997169600 | 0.36388605591800 | T | T | T |
| 0.62527985521700 | 0.26490997169600 | 0.69721938925200 | T | T | T |
| 0.95861318855000 | 0.26490997169600 | 0.03055272258530 | T | T | T |
| 0.95861318855000 | 0.26490997169600 | 0.36388605591800 | T | T | T |
| 0.95861318855000 | 0.26490997169600 | 0.69721938925100 | T | T | T |
| 0.29109328087300 | 0.26548394280500 | 0.25351310380500 | T | T | T |
| 0.29109328087300 | 0.26548394280600 | 0.58684643713800 | T | T | T |
| 0.29109328087300 | 0.26548394280600 | 0.92017977047200 | T | T | T |
| 0.62442661420600 | 0.26548394280500 | 0.25351310380500 | T | T | T |
| 0.62442661420600 | 0.26548394280500 | 0.58684643713800 | T | T | T |
| 0.62442661420600 | 0.26548394280500 | 0.92017977047100 | T | T | T |
| 0.95775994754000 | 0.26548394280500 | 0.25351310380500 | T | T | T |

|                  |                  |                  |   |   |   |
|------------------|------------------|------------------|---|---|---|
| 0.95775994754000 | 0.26548394280500 | 0.58684643713800 | T | T | T |
| 0.95775994753900 | 0.26548394280600 | 0.92017977047100 | T | T | T |
| 0.29318783931600 | 0.26544270081300 | 0.14148011023800 | T | T | T |
| 0.29318783931600 | 0.26544270081300 | 0.47481344357100 | T | T | T |
| 0.29318783931600 | 0.26544270081300 | 0.80814677690500 | T | T | T |
| 0.62652117264900 | 0.26544270081300 | 0.14148011023800 | T | T | T |
| 0.62652117264900 | 0.26544270081300 | 0.47481344357100 | T | T | T |
| 0.62652117264900 | 0.26544270081300 | 0.80814677690500 | T | T | T |
| 0.95985450598300 | 0.26544270081400 | 0.14148011023800 | T | T | T |
| 0.95985450598200 | 0.26544270081300 | 0.47481344357100 | T | T | T |
| 0.95985450598300 | 0.26544270081300 | 0.80814677690500 | T | T | T |
| 0.04195227942030 | 0.26525805500300 | 0.03089761203420 | T | T | T |
| 0.04195227942020 | 0.26525805500300 | 0.36423094536700 | T | T | T |
| 0.04195227942020 | 0.26525805500300 | 0.69756427870100 | T | T | T |
| 0.37528561275300 | 0.26525805500300 | 0.03089761203430 | T | T | T |
| 0.37528561275300 | 0.26525805500300 | 0.36423094536700 | T | T | T |
| 0.37528561275300 | 0.26525805500300 | 0.69756427870100 | T | T | T |
| 0.70861894608700 | 0.26525805500300 | 0.03089761203420 | T | T | T |
| 0.70861894608700 | 0.26525805500300 | 0.36423094536700 | T | T | T |
| 0.70861894608700 | 0.26525805500300 | 0.69756427870100 | T | T | T |
| 0.04080870835020 | 0.26563425226400 | 0.25288285857300 | T | T | T |
| 0.04080870835050 | 0.26563425226400 | 0.58621619190700 | T | T | T |
| 0.04080870835040 | 0.26563425226400 | 0.91954952524000 | T | T | T |
| 0.37414204168400 | 0.26563425226400 | 0.25288285857300 | T | T | T |
| 0.37414204168400 | 0.26563425226300 | 0.58621619190700 | T | T | T |
| 0.37414204168400 | 0.26563425226400 | 0.91954952524000 | T | T | T |
| 0.70747537501700 | 0.26563425226400 | 0.25288285857300 | T | T | T |
| 0.70747537501700 | 0.26563425226400 | 0.58621619190700 | T | T | T |
| 0.70747537501700 | 0.26563425226400 | 0.91954952524000 | T | T | T |
| 0.04103701586190 | 0.26601207363100 | 0.14249810755200 | T | T | T |

|                  |                  |                  |   |   |   |
|------------------|------------------|------------------|---|---|---|
| 0.04103701586200 | 0.26601207363100 | 0.47583144088500 | T | T | T |
| 0.04103701586180 | 0.26601207363100 | 0.80916477421800 | T | T | T |
| 0.37437034919500 | 0.26601207363100 | 0.14249810755200 | T | T | T |
| 0.37437034919500 | 0.26601207363100 | 0.47583144088500 | T | T | T |
| 0.37437034919500 | 0.26601207363100 | 0.80916477421800 | T | T | T |
| 0.70770368252900 | 0.26601207363100 | 0.14249810755200 | T | T | T |
| 0.70770368252900 | 0.26601207363100 | 0.47583144088500 | T | T | T |
| 0.70770368252900 | 0.26601207363100 | 0.80916477421800 | T | T | T |
| 0.20833911261800 | 0.26534302232800 | 0.03104879384350 | T | T | T |
| 0.20833911261800 | 0.26534302232800 | 0.36438212717700 | T | T | T |
| 0.20833911261800 | 0.26534302232800 | 0.69771546051000 | T | T | T |
| 0.54167244595100 | 0.26534302232800 | 0.03104879384330 | T | T | T |
| 0.54167244595000 | 0.26534302232800 | 0.36438212717600 | T | T | T |
| 0.54167244595100 | 0.26534302232800 | 0.69771546051000 | T | T | T |
| 0.87500577928400 | 0.26534302232800 | 0.03104879384350 | T | T | T |
| 0.87500577928400 | 0.26534302232800 | 0.36438212717700 | T | T | T |
| 0.87500577928400 | 0.26534302232800 | 0.69771546051000 | T | T | T |
| 0.20714465803700 | 0.26423298247100 | 0.25155258575200 | T | T | T |
| 0.20714465803700 | 0.26423298247100 | 0.58488591908600 | T | T | T |
| 0.20714465803700 | 0.26423298247100 | 0.91821925241900 | T | T | T |
| 0.54047799137100 | 0.26423298247100 | 0.25155258575200 | T | T | T |
| 0.54047799137100 | 0.26423298247100 | 0.58488591908600 | T | T | T |
| 0.54047799137100 | 0.26423298247100 | 0.91821925241900 | T | T | T |
| 0.87381132470400 | 0.26423298247100 | 0.25155258575200 | T | T | T |
| 0.87381132470400 | 0.26423298247100 | 0.58488591908600 | T | T | T |
| 0.87381132470400 | 0.26423298247100 | 0.91821925241900 | T | T | T |
| 0.20887389903900 | 0.25718176482800 | 0.13463374979200 | T | T | T |
| 0.20887389903900 | 0.25718176482800 | 0.46796708312500 | T | T | T |
| 0.20887389903900 | 0.25718176482800 | 0.80130041645800 | T | T | T |
| 0.54220723237200 | 0.25718176482800 | 0.13463374979200 | T | T | T |



|                  |                  |                  |   |   |   |
|------------------|------------------|------------------|---|---|---|
| 0.54220723237200 | 0.25718176482800 | 0.46796708312500 | T | T | T |
| 0.54220723237200 | 0.25718176482800 | 0.80130041645800 | T | T | T |
| 0.87554056570600 | 0.25718176482800 | 0.13463374979200 | T | T | T |
| 0.87554056570600 | 0.25718176482800 | 0.46796708312600 | T | T | T |
| 0.87554056570500 | 0.25718176482800 | 0.80130041645800 | T | T | T |
| 0.19012800327000 | 0.37788191313600 | 0.22917052594300 | T | T | T |
| 0.19012800327000 | 0.37788191313600 | 0.56250385927700 | T | T | T |
| 0.19012800327000 | 0.37788191313600 | 0.89583719261000 | T | T | T |
| 0.52346133660300 | 0.37788191313600 | 0.22917052594300 | T | T | T |
| 0.52346133660200 | 0.37788191313600 | 0.56250385927700 | T | T | T |
| 0.52346133660200 | 0.37788191313600 | 0.89583719261000 | T | T | T |
| 0.85679466993600 | 0.37788191313600 | 0.22917052594400 | T | T | T |
| 0.85679466993600 | 0.37788191313600 | 0.56250385927700 | T | T | T |
| 0.85679466993600 | 0.37788191313600 | 0.89583719261000 | T | T | T |
| 0.22381569302500 | 0.33909599248700 | 0.24181667814200 | T | T | T |
| 0.22381569302500 | 0.33909599248700 | 0.57515001147500 | T | T | T |
| 0.22381569302500 | 0.33909599248700 | 0.90848334480800 | T | T | T |
| 0.55714902635800 | 0.33909599248700 | 0.24181667814200 | T | T | T |
| 0.55714902635800 | 0.33909599248800 | 0.57515001147500 | T | T | T |
| 0.55714902635800 | 0.33909599248700 | 0.90848334480800 | T | T | T |
| 0.89048235969100 | 0.33909599248800 | 0.24181667814200 | T | T | T |
| 0.89048235969100 | 0.33909599248800 | 0.57515001147500 | T | T | T |
| 0.89048235969100 | 0.33909599248800 | 0.90848334480800 | T | T | T |
| 0.16251119413300 | 0.36248315644300 | 0.24868480345900 | T | T | T |
| 0.16251119413300 | 0.36248315644300 | 0.58201813679200 | T | T | T |
| 0.16251119413300 | 0.36248315644300 | 0.91535147012500 | T | T | T |
| 0.49584452746700 | 0.36248315644400 | 0.24868480345900 | T | T | T |
| 0.49584452746600 | 0.36248315644300 | 0.58201813679200 | T | T | T |
| 0.49584452746700 | 0.36248315644300 | 0.91535147012500 | T | T | T |
| 0.82917786080000 | 0.36248315644300 | 0.24868480345900 | T | T | T |

|                  |                  |                  |   |   |   |
|------------------|------------------|------------------|---|---|---|
| 0.82917786080000 | 0.36248315644300 | 0.58201813679100 | T | T | T |
| 0.82917786080000 | 0.36248315644300 | 0.91535147012500 | T | T | T |
| 0.16282054178300 | 0.35320990842700 | 0.21473349813700 | T | T | T |
| 0.16282054178300 | 0.35320990842700 | 0.54806683147000 | T | T | T |
| 0.16282054178300 | 0.35320990842700 | 0.88140016480300 | T | T | T |
| 0.49615387511600 | 0.35320990842800 | 0.21473349813700 | T | T | T |
| 0.49615387511600 | 0.35320990842800 | 0.54806683147000 | T | T | T |
| 0.49615387511600 | 0.35320990842800 | 0.88140016480400 | T | T | T |
| 0.82948720845000 | 0.35320990842800 | 0.21473349813800 | T | T | T |
| 0.82948720845000 | 0.35320990842800 | 0.54806683147000 | T | T | T |
| 0.82948720845000 | 0.35320990842800 | 0.88140016480400 | T | T | T |
| 0.17601139736100 | 0.32296337363900 | 0.27430445286900 | T | T | T |
| 0.17601139736100 | 0.32296337363900 | 0.60763778620300 | T | T | T |
| 0.17601139736100 | 0.32296337363900 | 0.94097111953600 | T | T | T |
| 0.50934473069500 | 0.32296337363800 | 0.27430445287000 | T | T | T |
| 0.50934473069500 | 0.32296337363800 | 0.60763778620300 | T | T | T |
| 0.50934473069500 | 0.32296337363800 | 0.94097111953600 | T | T | T |
| 0.84267806402700 | 0.32296337363900 | 0.27430445286900 | T | T | T |
| 0.84267806402700 | 0.32296337363900 | 0.60763778620300 | T | T | T |
| 0.84267806402700 | 0.32296337363800 | 0.94097111953600 | T | T | T |
| 0.14293581400700 | 0.31999239579100 | 0.26963804961300 | T | T | T |
| 0.14293581400700 | 0.31999239579100 | 0.60297138294700 | T | T | T |
| 0.14293581400700 | 0.31999239579100 | 0.93630471627900 | T | T | T |
| 0.47626914734100 | 0.31999239579200 | 0.26963804961300 | T | T | T |
| 0.47626914734100 | 0.31999239579200 | 0.60297138294700 | T | T | T |
| 0.47626914734100 | 0.31999239579200 | 0.93630471627900 | T | T | T |
| 0.80960248067300 | 0.31999239579100 | 0.26963804961300 | T | T | T |
| 0.80960248067300 | 0.31999239579100 | 0.60297138294700 | T | T | T |
| 0.80960248067300 | 0.31999239579100 | 0.93630471627900 | T | T | T |
| 0.23279240845000 | 0.38790463207700 | 0.24825870057300 | T | T | T |

|                  |                  |                  |   |   |   |
|------------------|------------------|------------------|---|---|---|
| 0.23279240844900 | 0.38790463207600 | 0.58159203390700 | T | T | T |
| 0.23279240844900 | 0.38790463207700 | 0.91492536723900 | T | T | T |
| 0.56612574178200 | 0.38790463207700 | 0.24825870057300 | T | T | T |
| 0.56612574178100 | 0.38790463207700 | 0.58159203390700 | T | T | T |
| 0.56612574178200 | 0.38790463207700 | 0.91492536723900 | T | T | T |
| 0.89945907511600 | 0.38790463207700 | 0.24825870057300 | T | T | T |
| 0.89945907511500 | 0.38790463207600 | 0.58159203390700 | T | T | T |
| 0.89945907511600 | 0.38790463207700 | 0.91492536723900 | T | T | T |
| 0.14566437168800 | 0.30001641475100 | 0.18307079095200 | T | T | T |
| 0.14566437168800 | 0.30001641475200 | 0.51640412428500 | T | T | T |
| 0.14566437168800 | 0.30001641475100 | 0.84973745761800 | T | T | T |
| 0.47899770502100 | 0.30001641475100 | 0.18307079095200 | T | T | T |
| 0.47899770502100 | 0.30001641475200 | 0.51640412428600 | T | T | T |
| 0.47899770502100 | 0.30001641475100 | 0.84973745761800 | T | T | T |
| 0.81233103835500 | 0.30001641475100 | 0.18307079095200 | T | T | T |
| 0.81233103835500 | 0.30001641475100 | 0.51640412428500 | T | T | T |
| 0.81233103835500 | 0.30001641475100 | 0.84973745761800 | T | T | T |
| 0.17981986552200 | 0.30771491340700 | 0.18732394014800 | T | T | T |
| 0.17981986552100 | 0.30771491340700 | 0.52065727348200 | T | T | T |
| 0.17981986552200 | 0.30771491340700 | 0.85399060681400 | T | T | T |
| 0.51315319885500 | 0.30771491340700 | 0.18732394014900 | T | T | T |
| 0.51315319885400 | 0.30771491340700 | 0.52065727348200 | T | T | T |
| 0.51315319885500 | 0.30771491340700 | 0.85399060681500 | T | T | T |
| 0.84648653218900 | 0.30771491340700 | 0.18732394014800 | T | T | T |
| 0.84648653218800 | 0.30771491340700 | 0.52065727348200 | T | T | T |
| 0.84648653218900 | 0.30771491340700 | 0.85399060681400 | T | T | T |
| 0.19026183852100 | 0.88582886345100 | 0.23051524520600 | T | T | T |
| 0.19026183852100 | 0.88582886345100 | 0.56384857854000 | T | T | T |
| 0.19026183852100 | 0.88582886345100 | 0.89718191187300 | T | T | T |
| 0.52359517185500 | 0.88582886345200 | 0.23051524520600 | T | T | T |

|                  |                  |                  |   |   |   |
|------------------|------------------|------------------|---|---|---|
| 0.52359517185500 | 0.88582886345200 | 0.56384857854000 | T | T | T |
| 0.52359517185500 | 0.88582886345200 | 0.89718191187300 | T | T | T |
| 0.85692850518800 | 0.88582886345200 | 0.23051524520700 | T | T | T |
| 0.85692850518800 | 0.88582886345200 | 0.56384857854000 | T | T | T |
| 0.85692850518800 | 0.88582886345200 | 0.89718191187400 | T | T | T |
| 0.22337818378700 | 0.92463469093700 | 0.24314313512400 | T | T | T |
| 0.22337818378700 | 0.92463469093800 | 0.57647646845600 | T | T | T |
| 0.22337818378700 | 0.92463469093800 | 0.90980980179000 | T | T | T |
| 0.55671151712100 | 0.92463469093700 | 0.24314313512400 | T | T | T |
| 0.55671151712100 | 0.92463469093800 | 0.57647646845600 | T | T | T |
| 0.55671151712100 | 0.92463469093800 | 0.90980980179000 | T | T | T |
| 0.89004485045400 | 0.92463469093800 | 0.24314313512400 | T | T | T |
| 0.89004485045400 | 0.92463469093900 | 0.57647646845700 | T | T | T |
| 0.89004485045400 | 0.92463469093900 | 0.90980980179000 | T | T | T |
| 0.16300344661800 | 0.90154802994400 | 0.25044407800800 | T | T | T |
| 0.16300344661800 | 0.90154802994400 | 0.58377741134200 | T | T | T |
| 0.16300344661800 | 0.90154802994400 | 0.91711074467500 | T | T | T |
| 0.49633677995200 | 0.90154802994400 | 0.25044407800800 | T | T | T |
| 0.49633677995200 | 0.90154802994400 | 0.58377741134200 | T | T | T |
| 0.49633677995200 | 0.90154802994400 | 0.91711074467500 | T | T | T |
| 0.82967011328500 | 0.90154802994400 | 0.25044407800800 | T | T | T |
| 0.82967011328500 | 0.90154802994400 | 0.58377741134200 | T | T | T |
| 0.82967011328500 | 0.90154802994400 | 0.91711074467500 | T | T | T |
| 0.16249818243300 | 0.90953562285300 | 0.21608777629800 | T | T | T |
| 0.16249818243300 | 0.90953562285200 | 0.54942110963200 | T | T | T |
| 0.16249818243400 | 0.90953562285200 | 0.88275444296500 | T | T | T |
| 0.49583151576700 | 0.90953562285200 | 0.21608777629800 | T | T | T |
| 0.49583151576700 | 0.90953562285200 | 0.54942110963200 | T | T | T |
| 0.49583151576700 | 0.90953562285200 | 0.88275444296500 | T | T | T |
| 0.82916484910100 | 0.90953562285200 | 0.21608777629800 | T | T | T |

|                  |                  |                  |   |   |   |
|------------------|------------------|------------------|---|---|---|
| 0.82916484910100 | 0.90953562285200 | 0.54942110963200 | T | T | T |
| 0.82916484910100 | 0.90953562285200 | 0.88275444296500 | T | T | T |
| 0.17702862989400 | 0.94178421320000 | 0.27487787685600 | T | T | T |
| 0.17702862989400 | 0.94178421320000 | 0.60821121018900 | T | T | T |
| 0.17702862989400 | 0.94178421320000 | 0.94154454352200 | T | T | T |
| 0.51036196322700 | 0.94178421320100 | 0.27487787685600 | T | T | T |
| 0.51036196322800 | 0.94178421320100 | 0.60821121018900 | T | T | T |
| 0.51036196322700 | 0.94178421320100 | 0.94154454352300 | T | T | T |
| 0.84369529656100 | 0.94178421320100 | 0.27487787685600 | T | T | T |
| 0.84369529656100 | 0.94178421320100 | 0.60821121018900 | T | T | T |
| 0.84369529656100 | 0.94178421320100 | 0.94154454352200 | T | T | T |
| 0.14367791732200 | 0.94311232548500 | 0.27139256564300 | T | T | T |
| 0.14367791732200 | 0.94311232548500 | 0.60472589897600 | T | T | T |
| 0.14367791732200 | 0.94311232548500 | 0.93805923231000 | T | T | T |
| 0.47701125065500 | 0.94311232548400 | 0.27139256564300 | T | T | T |
| 0.47701125065500 | 0.94311232548500 | 0.60472589897600 | T | T | T |
| 0.47701125065500 | 0.94311232548500 | 0.93805923231000 | T | T | T |
| 0.81034458398900 | 0.94311232548500 | 0.27139256564300 | T | T | T |
| 0.81034458398900 | 0.94311232548500 | 0.60472589897600 | T | T | T |
| 0.81034458398900 | 0.94311232548500 | 0.93805923231000 | T | T | T |
| 0.23253335635000 | 0.87598700860700 | 0.24998157661400 | T | T | T |
| 0.23253335634900 | 0.87598700860800 | 0.58331490994600 | T | T | T |
| 0.23253335634900 | 0.87598700860800 | 0.91664824328000 | T | T | T |
| 0.56586668968400 | 0.87598700860700 | 0.24998157661400 | T | T | T |
| 0.56586668968300 | 0.87598700860800 | 0.58331490994600 | T | T | T |
| 0.56586668968300 | 0.87598700860800 | 0.91664824328000 | T | T | T |
| 0.89920002301700 | 0.87598700860700 | 0.24998157661300 | T | T | T |
| 0.89920002301600 | 0.87598700860900 | 0.58331490994500 | T | T | T |
| 0.89920002301600 | 0.87598700860900 | 0.91664824327900 | T | T | T |
| 0.14479765808900 | 0.96266327763800 | 0.18305922068400 | T | T | T |

|                  |                  |                  |   |   |   |
|------------------|------------------|------------------|---|---|---|
| 0.14479765808900 | 0.96266327763800 | 0.51639255401800 | T | T | T |
| 0.14479765809000 | 0.96266327763800 | 0.84972588735200 | T | T | T |
| 0.47813099142300 | 0.96266327763800 | 0.18305922068400 | T | T | T |
| 0.47813099142300 | 0.96266327763800 | 0.51639255401800 | T | T | T |
| 0.47813099142400 | 0.96266327763800 | 0.84972588735200 | T | T | T |
| 0.81146432475600 | 0.96266327763800 | 0.18305922068400 | T | T | T |
| 0.81146432475600 | 0.96266327763800 | 0.51639255401800 | T | T | T |
| 0.81146432475700 | 0.96266327763800 | 0.84972588735200 | T | T | T |
| 0.17902952232000 | 0.95512588785000 | 0.18762688728600 | T | T | T |
| 0.17902952232000 | 0.95512588785000 | 0.52096022062000 | T | T | T |
| 0.17902952231900 | 0.95512588785000 | 0.85429355395300 | T | T | T |
| 0.51236285565400 | 0.95512588785000 | 0.18762688728600 | T | T | T |
| 0.51236285565400 | 0.95512588785000 | 0.52096022062000 | T | T | T |
| 0.51236285565300 | 0.95512588785000 | 0.85429355395300 | T | T | T |
| 0.84569618898700 | 0.95512588785000 | 0.18762688728500 | T | T | T |
| 0.84569618898700 | 0.95512588785000 | 0.52096022061900 | T | T | T |
| 0.84569618898600 | 0.95512588785000 | 0.85429355395300 | T | T | T |
| 0.23757597794900 | 0.36111756560800 | 0.15189886189300 | T | T | T |
| 0.23757597794900 | 0.36111756561000 | 0.48523219522600 | T | T | T |
| 0.23757597794900 | 0.36111756560800 | 0.81856552855900 | T | T | T |
| 0.57090931128200 | 0.36111756560800 | 0.15189886189300 | T | T | T |
| 0.57090931128200 | 0.36111756561000 | 0.48523219522600 | T | T | T |
| 0.57090931128200 | 0.36111756560800 | 0.81856552855900 | T | T | T |
| 0.90424264461600 | 0.36111756560900 | 0.15189886189300 | T | T | T |
| 0.90424264461600 | 0.36111756561100 | 0.48523219522600 | T | T | T |
| 0.90424264461600 | 0.36111756560900 | 0.81856552855900 | T | T | T |
| 0.23743957595500 | 0.90249861236500 | 0.15344981017900 | T | T | T |
| 0.23743957595500 | 0.90249861236500 | 0.48678314351300 | T | T | T |
| 0.23743957595500 | 0.90249861236600 | 0.82011647684600 | T | T | T |
| 0.57077290928900 | 0.90249861236500 | 0.15344981017900 | T | T | T |

|                  |                  |                  |   |   |   |
|------------------|------------------|------------------|---|---|---|
| 0.57077290928900 | 0.90249861236500 | 0.48678314351300 | T | T | T |
| 0.57077290928900 | 0.90249861236600 | 0.82011647684600 | T | T | T |
| 0.90410624262200 | 0.90249861236400 | 0.15344981017900 | T | T | T |
| 0.90410624262200 | 0.90249861236500 | 0.48678314351300 | T | T | T |
| 0.90410624262200 | 0.90249861236600 | 0.82011647684600 | T | T | T |
| 0.22287485830300 | 0.36981387275600 | 0.23490302896300 | T | T | T |
| 0.22287485830300 | 0.36981387275700 | 0.56823636229700 | T | T | T |
| 0.22287485830300 | 0.36981387275600 | 0.90156969562900 | T | T | T |
| 0.55620819163600 | 0.36981387275600 | 0.23490302896300 | T | T | T |
| 0.55620819163600 | 0.36981387275700 | 0.56823636229700 | T | T | T |
| 0.55620819163600 | 0.36981387275600 | 0.90156969562900 | T | T | T |
| 0.88954152496900 | 0.36981387275600 | 0.23490302896300 | T | T | T |
| 0.88954152496900 | 0.36981387275700 | 0.56823636229700 | T | T | T |
| 0.88954152496900 | 0.36981387275600 | 0.90156969562900 | T | T | T |
| 0.16809707016400 | 0.37670113542700 | 0.22847949638000 | T | T | T |
| 0.16809707016400 | 0.37670113542700 | 0.56181282971300 | T | T | T |
| 0.16809707016400 | 0.37670113542700 | 0.89514616304600 | T | T | T |
| 0.50143040349800 | 0.37670113542600 | 0.22847949638000 | T | T | T |
| 0.50143040349800 | 0.37670113542600 | 0.56181282971200 | T | T | T |
| 0.50143040349800 | 0.37670113542600 | 0.89514616304600 | T | T | T |
| 0.83476373683200 | 0.37670113542600 | 0.22847949638000 | T | T | T |
| 0.83476373683200 | 0.37670113542600 | 0.56181282971200 | T | T | T |
| 0.83476373683200 | 0.37670113542600 | 0.89514616304600 | T | T | T |
| 0.15894312706100 | 0.34226147176400 | 0.27265008900900 | T | T | T |
| 0.15894312706100 | 0.34226147176400 | 0.60598342234300 | T | T | T |
| 0.15894312706100 | 0.34226147176400 | 0.93931675567500 | T | T | T |
| 0.49227646039300 | 0.34226147176400 | 0.27265008900900 | T | T | T |
| 0.49227646039300 | 0.34226147176400 | 0.60598342234300 | T | T | T |
| 0.49227646039300 | 0.34226147176400 | 0.93931675567500 | T | T | T |
| 0.82560979372700 | 0.34226147176400 | 0.27265008900900 | T | T | T |

|                  |                  |                  |   |   |   |
|------------------|------------------|------------------|---|---|---|
| 0.82560979372700 | 0.34226147176500 | 0.60598342234300 | T | T | T |
| 0.82560979372700 | 0.34226147176500 | 0.93931675567600 | T | T | T |
| 0.16048296069800 | 0.30650316553900 | 0.19729961414300 | T | T | T |
| 0.16048296069800 | 0.30650316554000 | 0.53063294747700 | T | T | T |
| 0.16048296069800 | 0.30650316553900 | 0.86396628080900 | T | T | T |
| 0.49381629403200 | 0.30650316553900 | 0.19729961414200 | T | T | T |
| 0.49381629403200 | 0.30650316553900 | 0.53063294747600 | T | T | T |
| 0.49381629403200 | 0.30650316553900 | 0.86396628080800 | T | T | T |
| 0.82714962736500 | 0.30650316553900 | 0.19729961414300 | T | T | T |
| 0.82714962736500 | 0.30650316553900 | 0.53063294747700 | T | T | T |
| 0.82714962736500 | 0.30650316553900 | 0.86396628080900 | T | T | T |
| 0.22285577576600 | 0.89375946800100 | 0.23631185698000 | T | T | T |
| 0.22285577576700 | 0.89375946799800 | 0.56964519031300 | T | T | T |
| 0.22285577576700 | 0.89375946799800 | 0.90297852364700 | T | T | T |
| 0.55618910910000 | 0.89375946800100 | 0.23631185698000 | T | T | T |
| 0.55618910910100 | 0.89375946799800 | 0.56964519031300 | T | T | T |
| 0.55618910910100 | 0.89375946799800 | 0.90297852364700 | T | T | T |
| 0.88952244243400 | 0.89375946799900 | 0.23631185698100 | T | T | T |
| 0.88952244243500 | 0.89375946799600 | 0.56964519031400 | T | T | T |
| 0.88952244243400 | 0.89375946799600 | 0.90297852364800 | T | T | T |
| 0.16818041263300 | 0.88691741704200 | 0.23010679130900 | T | T | T |
| 0.16818041263300 | 0.88691741704100 | 0.56344012464200 | T | T | T |
| 0.16818041263300 | 0.88691741704200 | 0.89677345797500 | T | T | T |
| 0.50151374596700 | 0.88691741704200 | 0.23010679130900 | T | T | T |
| 0.50151374596700 | 0.88691741704100 | 0.56344012464200 | T | T | T |
| 0.50151374596700 | 0.88691741704200 | 0.89677345797500 | T | T | T |
| 0.83484707930000 | 0.88691741704100 | 0.23010679130900 | T | T | T |
| 0.83484707930000 | 0.88691741704100 | 0.56344012464200 | T | T | T |
| 0.83484707930000 | 0.88691741704100 | 0.89677345797500 | T | T | T |
| 0.16017983631400 | 0.92171445529400 | 0.27428330324300 | T | T | T |



|                  |                  |                  |   |   |   |
|------------------|------------------|------------------|---|---|---|
| 0.16017983631400 | 0.92171445529400 | 0.60761663657600 | T | T | T |
| 0.16017983631400 | 0.92171445529300 | 0.94094996990900 | T | T | T |
| 0.49351316964700 | 0.92171445529200 | 0.27428330324300 | T | T | T |
| 0.49351316964700 | 0.92171445529200 | 0.60761663657600 | T | T | T |
| 0.49351316964700 | 0.92171445529200 | 0.94094996990900 | T | T | T |
| 0.82684650298000 | 0.92171445529200 | 0.27428330324300 | T | T | T |
| 0.82684650298000 | 0.92171445529200 | 0.60761663657600 | T | T | T |
| 0.82684650298000 | 0.92171445529200 | 0.94094996990900 | T | T | T |
| 0.15955144289100 | 0.95609593512400 | 0.19741086896400 | T | T | T |
| 0.15955144289000 | 0.95609593512400 | 0.53074420229700 | T | T | T |
| 0.15955144289100 | 0.95609593512400 | 0.86407753562900 | T | T | T |
| 0.49288477622400 | 0.95609593512400 | 0.19741086896400 | T | T | T |
| 0.49288477622400 | 0.95609593512400 | 0.53074420229800 | T | T | T |
| 0.49288477622500 | 0.95609593512400 | 0.86407753562900 | T | T | T |
| 0.82621810955800 | 0.95609593512400 | 0.19741086896400 | T | T | T |
| 0.82621810955800 | 0.95609593512400 | 0.53074420229800 | T | T | T |
| 0.82621810955800 | 0.95609593512400 | 0.86407753563000 | T | T | T |
| 0.20962839961000 | 0.31751531411400 | 0.17694854777600 | T | T | T |
| 0.20962839961100 | 0.31751531411500 | 0.51028188110900 | T | T | T |
| 0.20962839961000 | 0.31751531411400 | 0.84361521444200 | T | T | T |
| 0.54296173294400 | 0.31751531411300 | 0.17694854777600 | T | T | T |
| 0.54296173294400 | 0.31751531411400 | 0.51028188110900 | T | T | T |
| 0.54296173294400 | 0.31751531411300 | 0.84361521444200 | T | T | T |
| 0.87629506627800 | 0.31751531411400 | 0.17694854777600 | T | T | T |
| 0.87629506627800 | 0.31751531411500 | 0.51028188110900 | T | T | T |
| 0.87629506627800 | 0.31751531411400 | 0.84361521444200 | T | T | T |
| 0.23486176111900 | 0.33512575721900 | 0.14021914487800 | T | T | T |
| 0.23486176111800 | 0.33512575721600 | 0.47355247821100 | T | T | T |
| 0.23486176111900 | 0.33512575721900 | 0.80688581154400 | T | T | T |
| 0.56819509445100 | 0.33512575721900 | 0.14021914487800 | T | T | T |

|                  |                  |                  |   |   |   |
|------------------|------------------|------------------|---|---|---|
| 0.56819509445000 | 0.33512575721600 | 0.47355247821200 | T | T | T |
| 0.56819509445100 | 0.33512575721900 | 0.80688581154400 | T | T | T |
| 0.90152842778400 | 0.33512575721900 | 0.14021914487800 | T | T | T |
| 0.90152842778300 | 0.33512575721600 | 0.47355247821100 | T | T | T |
| 0.90152842778400 | 0.33512575721900 | 0.80688581154400 | T | T | T |
| 0.20916785161400 | 0.94632601261500 | 0.17795077786100 | T | T | T |
| 0.20916785161400 | 0.94632601261600 | 0.51128411119500 | T | T | T |
| 0.20916785161400 | 0.94632601261600 | 0.84461744452900 | T | T | T |
| 0.54250118494800 | 0.94632601261500 | 0.17795077786100 | T | T | T |
| 0.54250118494800 | 0.94632601261600 | 0.51128411119500 | T | T | T |
| 0.54250118494800 | 0.94632601261600 | 0.84461744452900 | T | T | T |
| 0.87583451828200 | 0.94632601261500 | 0.17795077786200 | T | T | T |
| 0.87583451828200 | 0.94632601261600 | 0.51128411119500 | T | T | T |
| 0.87583451828200 | 0.94632601261600 | 0.84461744453000 | T | T | T |
| 0.23482335688300 | 0.92826105078700 | 0.14157329494000 | T | T | T |
| 0.23482335688300 | 0.92826105078700 | 0.47490662827300 | T | T | T |
| 0.23482335688400 | 0.92826105078400 | 0.80823996160600 | T | T | T |
| 0.56815669021600 | 0.92826105078700 | 0.14157329493900 | T | T | T |
| 0.56815669021700 | 0.92826105078700 | 0.47490662827300 | T | T | T |
| 0.56815669021800 | 0.92826105078400 | 0.80823996160600 | T | T | T |
| 0.90149002355000 | 0.92826105078800 | 0.14157329493900 | T | T | T |
| 0.90149002355000 | 0.92826105078700 | 0.47490662827300 | T | T | T |
| 0.90149002355100 | 0.92826105078500 | 0.80823996160600 | T | T | T |
| 0.21818235272200 | 0.30662678038900 | 0.15407459862200 | T | T | T |
| 0.21818235272200 | 0.30662678038900 | 0.48740793195500 | T | T | T |
| 0.21818235272200 | 0.30662678038900 | 0.82074126528800 | T | T | T |
| 0.55151568605500 | 0.30662678038900 | 0.15407459862200 | T | T | T |
| 0.55151568605500 | 0.30662678039000 | 0.48740793195500 | T | T | T |
| 0.55151568605500 | 0.30662678038900 | 0.82074126528800 | T | T | T |
| 0.88484901938800 | 0.30662678038800 | 0.15407459862200 | T | T | T |

|                  |                  |                  |   |   |   |
|------------------|------------------|------------------|---|---|---|
| 0.88484901938900 | 0.30662678038900 | 0.48740793195500 | T | T | T |
| 0.88484901938800 | 0.30662678038800 | 0.82074126528800 | T | T | T |
| 0.21802968509000 | 0.95695964067000 | 0.15510710357000 | T | T | T |
| 0.21802968509000 | 0.95695964067000 | 0.48844043690400 | T | T | T |
| 0.21802968508900 | 0.95695964067100 | 0.82177377023800 | T | T | T |
| 0.55136301842300 | 0.95695964067000 | 0.15510710357000 | T | T | T |
| 0.55136301842300 | 0.95695964067000 | 0.48844043690400 | T | T | T |
| 0.55136301842300 | 0.95695964067100 | 0.82177377023800 | T | T | T |
| 0.88469635175700 | 0.95695964067000 | 0.15510710357000 | T | T | T |
| 0.88469635175700 | 0.95695964066900 | 0.48844043690400 | T | T | T |
| 0.88469635175700 | 0.95695964067000 | 0.82177377023800 | T | T | T |

**6) Large supercell 1-H<sup>+</sup><sub>sol</sub> FS**

POSCAR

1

|                    |                    |                    |
|--------------------|--------------------|--------------------|
| 46.81727999995964  | 0.0000000000000000 | 0.0000000000000000 |
| 0.0000000000000000 | 30.38812199999634  | 0.0000000000000000 |
| 0.0000000000000000 | 0.0000000000000000 | 49.65722999997833  |

Ga P H O C

540 540 180 108 18

Direct

|                  |                  |                  |   |   |   |
|------------------|------------------|------------------|---|---|---|
| 0.00053430116785 | 0.01554618058310 | 0.00744742432283 | T | T | T |
| 0.00077573210536 | 0.01553403753140 | 0.34088866840100 | T | T | T |
| 0.00070204454243 | 0.01557653079460 | 0.67417385276300 | T | T | T |
| 0.33407652185600 | 0.01553007356360 | 0.00748513596910 | T | T | T |
| 0.33387964921500 | 0.01566542497520 | 0.34070200967200 | T | T | T |
| 0.33404235972100 | 0.01557750785430 | 0.67416909476300 | T | T | T |
| 0.66736015217300 | 0.01554822103230 | 0.00750278992866 | T | T | T |
| 0.66736251331400 | 0.01555366322850 | 0.34084471325200 | T | T | T |
| 0.66736898036300 | 0.01556587738480 | 0.67417300792600 | T | T | T |

|                  |                  |                  |   |   |   |
|------------------|------------------|------------------|---|---|---|
| 0.33238097017100 | 0.01544321941330 | 0.22988776596500 | T | T | T |
| 0.33234816804500 | 0.01555419264260 | 0.56326308661500 | T | T | T |
| 0.33236467946800 | 0.01555697319590 | 0.89661603135400 | T | T | T |
| 0.66568094954600 | 0.01553049635360 | 0.22993489556300 | T | T | T |
| 0.66568016452900 | 0.01554505071180 | 0.56327086360500 | T | T | T |
| 0.66567829738900 | 0.01553635640540 | 0.89659912796500 | T | T | T |
| 0.99938444482300 | 0.01549258571460 | 0.23006313908200 | T | T | T |
| 0.99901770237100 | 0.01555009576720 | 0.56326826557000 | T | T | T |
| 0.99899979222300 | 0.01556855699310 | 0.89661049683800 | T | T | T |
| 0.00129401017608 | 0.01568638051170 | 0.11789501914600 | T | T | T |
| 0.00115160446107 | 0.01585142621860 | 0.45122918866200 | T | T | T |
| 0.00113882510657 | 0.01586530656420 | 0.78455994572300 | T | T | T |
| 0.33404664215600 | 0.01537586566910 | 0.11813455068300 | T | T | T |
| 0.33447313901900 | 0.01587697305700 | 0.45121052421900 | T | T | T |
| 0.33448236814500 | 0.01586143746450 | 0.78455883518500 | T | T | T |
| 0.66780750032400 | 0.01583126096000 | 0.11788775825800 | T | T | T |
| 0.66780900690500 | 0.01584771104470 | 0.45122925519500 | T | T | T |
| 0.66781010942800 | 0.01584966757640 | 0.78455722012500 | T | T | T |
| 0.16624535960700 | 0.01550416021800 | 0.00760947685250 | T | T | T |
| 0.16638002025600 | 0.01543444385080 | 0.34064349929600 | T | T | T |
| 0.16616048257400 | 0.01539786537300 | 0.67538372357200 | T | T | T |
| 0.49946988864100 | 0.01536032302400 | 0.00877035853164 | T | T | T |
| 0.49944364614600 | 0.01538240818280 | 0.34214270013500 | T | T | T |
| 0.49948552281500 | 0.01538732021200 | 0.67541935031700 | T | T | T |
| 0.83278368874200 | 0.01536875706830 | 0.00876159655610 | T | T | T |
| 0.83282553290600 | 0.01537469486130 | 0.34213960246900 | T | T | T |
| 0.83281914378900 | 0.01538713056650 | 0.67542902524500 | T | T | T |
| 0.16619912313300 | 0.00826068319734 | 0.22562728185800 | T | T | T |
| 0.16393792355700 | 0.01219723384610 | 0.55896325876400 | T | T | T |
| 0.16393855040300 | 0.01220475301200 | 0.89228403621500 | T | T | T |

|                  |                  |                  |   |   |   |
|------------------|------------------|------------------|---|---|---|
| 0.49729552060300 | 0.01221469528870 | 0.22566789750100 | T | T | T |
| 0.49726396649000 | 0.01219843780520 | 0.55897143844700 | T | T | T |
| 0.49728113013900 | 0.01219086211050 | 0.89231042286900 | T | T | T |
| 0.83064012153400 | 0.01219124834600 | 0.22565182633600 | T | T | T |
| 0.83061475169100 | 0.01220307823790 | 0.55898298377200 | T | T | T |
| 0.83059367306100 | 0.01219638377700 | 0.89230692697400 | T | T | T |
| 0.16714961761400 | 0.01530197746810 | 0.11924964163200 | T | T | T |
| 0.16318599818400 | 0.98097529964800 | 0.43639181215400 | T | T | T |
| 0.16317539548200 | 0.98096879939000 | 0.76973768823700 | T | T | T |
| 0.49649562032700 | 0.98086780945900 | 0.10304209580100 | T | T | T |
| 0.49650269525000 | 0.98093266724100 | 0.43640091481600 | T | T | T |
| 0.49651079982100 | 0.98093909801000 | 0.76972790306400 | T | T | T |
| 0.82985174620000 | 0.98088982298300 | 0.10304722876400 | T | T | T |
| 0.82985097213800 | 0.98092412974600 | 0.43639675563600 | T | T | T |
| 0.82984417829300 | 0.98094171161700 | 0.76973013763900 | T | T | T |
| 0.08331435317620 | 0.01570039599990 | 0.00737379843303 | T | T | T |
| 0.08362711980520 | 0.01573910932830 | 0.34074013776700 | T | T | T |
| 0.08347836070600 | 0.01573837563250 | 0.67415810453800 | T | T | T |
| 0.41681478617400 | 0.01568946364420 | 0.00749039179103 | T | T | T |
| 0.41676898797800 | 0.01572770659080 | 0.34085182199500 | T | T | T |
| 0.41681178372700 | 0.01573241569230 | 0.67415915184800 | T | T | T |
| 0.75013482281700 | 0.01571120463890 | 0.00749159535487 | T | T | T |
| 0.75014485048500 | 0.01571490443530 | 0.34083415623100 | T | T | T |
| 0.75014417062500 | 0.01572613997300 | 0.67416195775500 | T | T | T |
| 0.08304364990850 | 0.01535128521730 | 0.23004354178700 | T | T | T |
| 0.08105601231690 | 0.01592888457230 | 0.56158235674200 | T | T | T |
| 0.08103136741310 | 0.01594690583890 | 0.89490489916300 | T | T | T |
| 0.41436739975400 | 0.01592014565550 | 0.22828214478500 | T | T | T |
| 0.41438405915300 | 0.01592357311780 | 0.56158329424500 | T | T | T |
| 0.41439762888000 | 0.01591252073570 | 0.89492097570300 | T | T | T |

|                  |                  |                  |   |   |   |
|------------------|------------------|------------------|---|---|---|
| 0.74772200600200 | 0.01589786981890 | 0.22825301104900 | T | T | T |
| 0.74772278477700 | 0.01591827323870 | 0.56158773365500 | T | T | T |
| 0.74771437396200 | 0.01591183688020 | 0.89491733650400 | T | T | T |
| 0.08359237117110 | 0.01548625722020 | 0.11930826945200 | T | T | T |
| 0.08375442817630 | 0.01482064752800 | 0.45341122672900 | T | T | T |
| 0.08374160566390 | 0.01478437023800 | 0.78677470899600 | T | T | T |
| 0.41691284448800 | 0.01418346939450 | 0.12007422215000 | T | T | T |
| 0.41706822593500 | 0.01474586545080 | 0.45343705392000 | T | T | T |
| 0.41708024925000 | 0.01475599333360 | 0.78676765674300 | T | T | T |
| 0.75041646046800 | 0.01462943765160 | 0.12009093124300 | T | T | T |
| 0.75041931900300 | 0.01469648537840 | 0.45344378360300 | T | T | T |
| 0.75041186648200 | 0.01472356526170 | 0.78676913020400 | T | T | T |
| 0.25008613530600 | 0.01560102323340 | 0.00753960345072 | T | T | T |
| 0.24987402125800 | 0.01587367171400 | 0.34062920250000 | T | T | T |
| 0.24989834540000 | 0.01569465789460 | 0.67429209788200 | T | T | T |
| 0.58322110305700 | 0.01566100519070 | 0.00762906002517 | T | T | T |
| 0.58321543588900 | 0.01567236137280 | 0.34097476457700 | T | T | T |
| 0.58322698715700 | 0.01568189363780 | 0.67429763937800 | T | T | T |
| 0.91650809494200 | 0.01566944296080 | 0.00761357511544 | T | T | T |
| 0.91658728189000 | 0.01566725905310 | 0.34098356470100 | T | T | T |
| 0.91655993508500 | 0.01568772850270 | 0.67429925053600 | T | T | T |
| 0.24975726000900 | 0.01155141051890 | 0.22616588605200 | T | T | T |
| 0.24997855938700 | 0.01574670667870 | 0.56321530466600 | T | T | T |
| 0.25000005115200 | 0.01575522120560 | 0.89655046983100 | T | T | T |
| 0.58331396604900 | 0.01570948520870 | 0.22988503033400 | T | T | T |
| 0.58330855826000 | 0.01573124348960 | 0.56322152568700 | T | T | T |
| 0.58331071552300 | 0.01572118298060 | 0.89655065267700 | T | T | T |
| 0.91671333268900 | 0.01567703196150 | 0.22990623433800 | T | T | T |
| 0.91664610327200 | 0.01573607343980 | 0.56322194360900 | T | T | T |
| 0.91663239690900 | 0.01573311696200 | 0.89655146385400 | T | T | T |

|                  |                  |                  |   |   |   |
|------------------|------------------|------------------|---|---|---|
| 0.25021079117300 | 0.01576350073120 | 0.11780762338000 | T | T | T |
| 0.25434859644100 | 0.01856226978630 | 0.44917326653200 | T | T | T |
| 0.25434115766800 | 0.01853367799340 | 0.78254169713800 | T | T | T |
| 0.58765211737500 | 0.01846613644950 | 0.11587673336700 | T | T | T |
| 0.58765772674000 | 0.01850406750550 | 0.44921819892200 | T | T | T |
| 0.58766722158400 | 0.01850490337220 | 0.78254325120300 | T | T | T |
| 0.92108721221200 | 0.01837408368820 | 0.11587075928600 | T | T | T |
| 0.92099538627500 | 0.01850756701030 | 0.44921996125100 | T | T | T |
| 0.92099852124400 | 0.01852056560450 | 0.78254654188100 | T | T | T |
| 0.12534466275400 | 0.06412773215810 | 0.05513406250330 | T | T | T |
| 0.12739928942500 | 0.06453112640990 | 0.38890341168700 | T | T | T |
| 0.12728347256100 | 0.06466537324210 | 0.72242373688000 | T | T | T |
| 0.46050828730700 | 0.06463877825970 | 0.05586359230980 | T | T | T |
| 0.46059657733600 | 0.06467523110630 | 0.38915375354400 | T | T | T |
| 0.46060685583600 | 0.06466543496070 | 0.72244869116000 | T | T | T |
| 0.79391985245600 | 0.06465881857650 | 0.05582988066200 | T | T | T |
| 0.79392859109300 | 0.06466581174750 | 0.38916685045000 | T | T | T |
| 0.79393837308300 | 0.06466610757380 | 0.72245892536500 | T | T | T |
| 0.12529906789300 | 0.06428182108570 | 0.27696344720700 | T | T | T |
| 0.12495386071000 | 0.06483489859260 | 0.61099139758800 | T | T | T |
| 0.12476685744000 | 0.06486004880350 | 0.94411218647300 | T | T | T |
| 0.45825848999400 | 0.06482595394580 | 0.27773141897500 | T | T | T |
| 0.45829198223600 | 0.06483772491690 | 0.61101238922500 | T | T | T |
| 0.45828956062800 | 0.06483443052770 | 0.94436042790000 | T | T | T |
| 0.79163458368300 | 0.06483253247330 | 0.27772242966600 | T | T | T |
| 0.79162834600900 | 0.06483620566570 | 0.61102016458500 | T | T | T |
| 0.79162141535000 | 0.06483476594030 | 0.94435864903200 | T | T | T |
| 0.12546706511400 | 0.06454117097630 | 0.16621298752900 | T | T | T |
| 0.12528773094000 | 0.06363359452140 | 0.49698200108600 | T | T | T |
| 0.12529110952300 | 0.06363666554420 | 0.83031614999800 | T | T | T |

|                  |                  |                  |   |   |   |
|------------------|------------------|------------------|---|---|---|
| 0.45854173504300 | 0.06360650501110 | 0.16369980948000 | T | T | T |
| 0.45861576988500 | 0.06362845204130 | 0.49699985813200 | T | T | T |
| 0.45862044408400 | 0.06362419823050 | 0.83033250975300 | T | T | T |
| 0.79193492769900 | 0.06361391601080 | 0.16368590071400 | T | T | T |
| 0.79194867170400 | 0.06362530877880 | 0.49701019081100 | T | T | T |
| 0.79194420325300 | 0.06362647227330 | 0.83033625070000 | T | T | T |
| 0.29216515953500 | 0.06411127496820 | 0.05492526332790 | T | T | T |
| 0.29226459747600 | 0.06436233901830 | 0.38782985111300 | T | T | T |
| 0.29227563174300 | 0.06436859319940 | 0.72129487049800 | T | T | T |
| 0.62560480403800 | 0.06435730449430 | 0.05468091967140 | T | T | T |
| 0.62560897115000 | 0.06436311532050 | 0.38801168269800 | T | T | T |
| 0.62560814464000 | 0.06436478776960 | 0.72131954224600 | T | T | T |
| 0.95883932277500 | 0.06433692667890 | 0.05460306982930 | T | T | T |
| 0.95894677501500 | 0.06437253164430 | 0.38801681815100 | T | T | T |
| 0.95893986833600 | 0.06436852786780 | 0.72130435341300 | T | T | T |
| 0.29146061120900 | 0.06386488117610 | 0.27652620062300 | T | T | T |
| 0.29184684627100 | 0.06437611388510 | 0.61089733672100 | T | T | T |
| 0.29186485249600 | 0.06440077376970 | 0.94424478932100 | T | T | T |
| 0.62517703908300 | 0.06436903903360 | 0.27761863552100 | T | T | T |
| 0.62517771696400 | 0.06437286368510 | 0.61092287419200 | T | T | T |
| 0.62517599895600 | 0.06436880716570 | 0.94426720956400 | T | T | T |
| 0.95854087945200 | 0.06434343034110 | 0.27765086208800 | T | T | T |
| 0.95850948924900 | 0.06437650031450 | 0.61091659126800 | T | T | T |
| 0.95849559908300 | 0.06437638831280 | 0.94422063018300 | T | T | T |
| 0.29179608789400 | 0.06448701148270 | 0.16586799178200 | T | T | T |
| 0.29207202384000 | 0.06425333325920 | 0.49905231977500 | T | T | T |
| 0.29207518664700 | 0.06425486770870 | 0.83239235629800 | T | T | T |
| 0.62539857408000 | 0.06424349371930 | 0.16575709808900 | T | T | T |
| 0.62540288659100 | 0.06424940115580 | 0.49907715655100 | T | T | T |
| 0.62540306947900 | 0.06424886231330 | 0.83240829900600 | T | T | T |



|                  |                  |                  |   |   |   |
|------------------|------------------|------------------|---|---|---|
| 0.95875897194700 | 0.06425705810920 | 0.16578864793200 | T | T | T |
| 0.95873595008300 | 0.06425132085170 | 0.49907181709300 | T | T | T |
| 0.95873306678000 | 0.06425564751660 | 0.83239797232800 | T | T | T |
| 0.04223356671970 | 0.06422847461830 | 0.05498752674400 | T | T | T |
| 0.04312594117880 | 0.06424216937660 | 0.38852967149000 | T | T | T |
| 0.04309429007200 | 0.06426425081770 | 0.72185180045400 | T | T | T |
| 0.37637166991000 | 0.06418566927070 | 0.05525403952900 | T | T | T |
| 0.37640073448800 | 0.06424345681650 | 0.38851352768900 | T | T | T |
| 0.37642689510800 | 0.06426583569430 | 0.72185306584400 | T | T | T |
| 0.70976136894400 | 0.06425437821680 | 0.05520143730590 | T | T | T |
| 0.70976214632100 | 0.06425679145040 | 0.38853897167900 | T | T | T |
| 0.70976249739100 | 0.06426115619000 | 0.72186011321700 | T | T | T |
| 0.04157505744860 | 0.06423031594880 | 0.27722586019700 | T | T | T |
| 0.04140868067370 | 0.06419188182390 | 0.60991343507700 | T | T | T |
| 0.04136880773100 | 0.06422398296460 | 0.94321664685200 | T | T | T |
| 0.37463430602100 | 0.06420388618440 | 0.27680911001700 | T | T | T |
| 0.37474737701400 | 0.06419270266560 | 0.60991819483700 | T | T | T |
| 0.37474730417300 | 0.06419791424430 | 0.94327568362200 | T | T | T |
| 0.70808696700200 | 0.06418694069530 | 0.27663642647500 | T | T | T |
| 0.70808237551200 | 0.06418964616770 | 0.60993694556100 | T | T | T |
| 0.70808056612700 | 0.06418641889660 | 0.94327689925800 | T | T | T |
| 0.04151716790510 | 0.06420459846210 | 0.16602217660300 | T | T | T |
| 0.04142265580970 | 0.06419366286100 | 0.49913384545400 | T | T | T |
| 0.04141609068090 | 0.06420975060030 | 0.83245946487700 | T | T | T |
| 0.37468117230100 | 0.06424019541090 | 0.16588081869700 | T | T | T |
| 0.37475363408500 | 0.06420839169230 | 0.49913202001200 | T | T | T |
| 0.37475463302700 | 0.06420443678800 | 0.83247240338200 | T | T | T |
| 0.70808561788200 | 0.06419519127840 | 0.16582627581200 | T | T | T |
| 0.70808621801300 | 0.06420050445590 | 0.49914894713200 | T | T | T |
| 0.70808502732200 | 0.06420044756970 | 0.83247849312400 | T | T | T |

|                  |                  |                  |   |   |   |
|------------------|------------------|------------------|---|---|---|
| 0.20810667832700 | 0.06414524915040 | 0.05497072849400 | T | T | T |
| 0.20572582916900 | 0.06436620211590 | 0.38848543837000 | T | T | T |
| 0.20576427107300 | 0.06446121847590 | 0.72194752473400 | T | T | T |
| 0.53909063072600 | 0.06444471458550 | 0.05531204754500 | T | T | T |
| 0.53909838592800 | 0.06445588850750 | 0.38863620241400 | T | T | T |
| 0.53910079450200 | 0.06445722924180 | 0.72195989581600 | T | T | T |
| 0.87242500543900 | 0.06443728418170 | 0.05530042515180 | T | T | T |
| 0.87244669163300 | 0.06445600738600 | 0.38864875484000 | T | T | T |
| 0.87243013973200 | 0.06446099905580 | 0.72195777704700 | T | T | T |
| 0.20812288437600 | 0.06404232412480 | 0.27639865647300 | T | T | T |
| 0.20783845129500 | 0.06437461189080 | 0.61112613187900 | T | T | T |
| 0.20791993131000 | 0.06440311421010 | 0.94430185687600 | T | T | T |
| 0.54116193190300 | 0.06436524645230 | 0.27784305611800 | T | T | T |
| 0.54117002490400 | 0.06437146045640 | 0.61114387474700 | T | T | T |
| 0.54116856377100 | 0.06436762756370 | 0.94449055757000 | T | T | T |
| 0.87451348545300 | 0.06436524104740 | 0.27785381043900 | T | T | T |
| 0.87450318617300 | 0.06437447749930 | 0.61114760381700 | T | T | T |
| 0.87449609190100 | 0.06436934959680 | 0.94447460204900 | T | T | T |
| 0.20797804711500 | 0.06478870257390 | 0.16610547358200 | T | T | T |
| 0.20794536684700 | 0.06683281026810 | 0.50067100069300 | T | T | T |
| 0.20794755774900 | 0.06683917551480 | 0.83401156705300 | T | T | T |
| 0.54128342220400 | 0.06680078398580 | 0.16737867106900 | T | T | T |
| 0.54128123057000 | 0.06682822433360 | 0.50069555952400 | T | T | T |
| 0.54128394706900 | 0.06681948702520 | 0.83402801637500 | T | T | T |
| 0.87464051755500 | 0.06682974863520 | 0.16738318008500 | T | T | T |
| 0.87461579619100 | 0.06681538030460 | 0.50069958422900 | T | T | T |
| 0.87461275672900 | 0.06682216107170 | 0.83401986400900 | T | T | T |
| 0.00000000000000 | 0.13043999673400 | 0.00000000000000 | F | F | F |
| 0.00000000000000 | 0.13043999673400 | 0.33333333333400 | F | F | F |
| 0.00000000000000 | 0.13043999673400 | 0.66666666666600 | F | F | F |

|                  |                  |                  |   |   |   |
|------------------|------------------|------------------|---|---|---|
| 0.33333333333400 | 0.13043999673400 | 0.00000000000000 | F | F | F |
| 0.33333333333400 | 0.13043999673400 | 0.33333333333400 | F | F | F |
| 0.33333333333400 | 0.13043999673400 | 0.66666666666600 | F | F | F |
| 0.66666666666600 | 0.13043999673400 | 0.00000000000000 | F | F | F |
| 0.66666666666600 | 0.13043999673400 | 0.33333333333400 | F | F | F |
| 0.66666666666600 | 0.13043999673400 | 0.66666666666600 | F | F | F |
| 0.00000000000000 | 0.13043999673400 | 0.22222334138000 | F | F | F |
| 0.00000000000000 | 0.13043999673400 | 0.55555667471300 | F | F | F |
| 0.00000000000000 | 0.13043999673400 | 0.88889000804700 | F | F | F |
| 0.33333333333400 | 0.13043999673400 | 0.22222334138000 | F | F | F |
| 0.33333333333400 | 0.13043999673400 | 0.55555667471300 | F | F | F |
| 0.33333333333400 | 0.13043999673400 | 0.88889000804700 | F | F | F |
| 0.66666666666600 | 0.13043999673400 | 0.22222334138000 | F | F | F |
| 0.66666666666600 | 0.13043999673400 | 0.55555667471300 | F | F | F |
| 0.66666666666600 | 0.13043999673400 | 0.88889000804700 | F | F | F |
| 0.00000000000000 | 0.13043999673400 | 0.11111000180100 | F | F | F |
| 0.00000000000000 | 0.13043999673400 | 0.44444333513300 | F | F | F |
| 0.00000000000000 | 0.13043999673400 | 0.77777666846700 | F | F | F |
| 0.33333333333400 | 0.13043999673400 | 0.11111000180100 | F | F | F |
| 0.33333333333400 | 0.13043999673400 | 0.44444333513300 | F | F | F |
| 0.33333333333400 | 0.13043999673400 | 0.77777666846700 | F | F | F |
| 0.66666666666600 | 0.13043999673400 | 0.11111000180100 | F | F | F |
| 0.66666666666600 | 0.13043999673400 | 0.44444333513300 | F | F | F |
| 0.66666666666600 | 0.13043999673400 | 0.77777666846700 | F | F | F |
| 0.16666666667500 | 0.13043999673400 | 0.00000000000000 | F | F | F |
| 0.16666666667500 | 0.13043999673400 | 0.33333333333400 | F | F | F |
| 0.16666666667500 | 0.13043999673400 | 0.66666666666600 | F | F | F |
| 0.50000000000900 | 0.13043999673400 | 0.00000000000000 | F | F | F |
| 0.50000000000900 | 0.13043999673400 | 0.33333333333400 | F | F | F |
| 0.50000000000900 | 0.13043999673400 | 0.66666666666600 | F | F | F |

|                  |                  |                  |   |   |   |
|------------------|------------------|------------------|---|---|---|
| 0.83333333334100 | 0.13043999673400 | 0.00000000000000 | F | F | F |
| 0.83333333334100 | 0.13043999673400 | 0.33333333333400 | F | F | F |
| 0.83333333334100 | 0.13043999673400 | 0.66666666666600 | F | F | F |
| 0.16666666667500 | 0.13043999673400 | 0.22222334138000 | F | F | F |
| 0.16666666667500 | 0.13043999673400 | 0.55555667471300 | F | F | F |
| 0.16666666667500 | 0.13043999673400 | 0.88889000804700 | F | F | F |
| 0.50000000000900 | 0.13043999673400 | 0.22222334138000 | F | F | F |
| 0.50000000000900 | 0.13043999673400 | 0.55555667471300 | F | F | F |
| 0.50000000000900 | 0.13043999673400 | 0.88889000804700 | F | F | F |
| 0.83333333334100 | 0.13043999673400 | 0.22222334138000 | F | F | F |
| 0.83333333334100 | 0.13043999673400 | 0.55555667471300 | F | F | F |
| 0.83333333334100 | 0.13043999673400 | 0.88889000804700 | F | F | F |
| 0.16666666667500 | 0.13043999673400 | 0.11111000180100 | F | F | F |
| 0.16666666667500 | 0.13043999673400 | 0.44444333513300 | F | F | F |
| 0.16666666667500 | 0.13043999673400 | 0.77777666846700 | F | F | F |
| 0.50000000000900 | 0.13043999673400 | 0.11111000180100 | F | F | F |
| 0.50000000000900 | 0.13043999673400 | 0.44444333513300 | F | F | F |
| 0.50000000000900 | 0.13043999673400 | 0.77777666846700 | F | F | F |
| 0.83333333334100 | 0.13043999673400 | 0.11111000180100 | F | F | F |
| 0.83333333334100 | 0.13043999673400 | 0.44444333513300 | F | F | F |
| 0.83333333334100 | 0.13043999673400 | 0.77777666846700 | F | F | F |
| 0.08333333332670 | 0.13043999673400 | 0.00000000000000 | F | F | F |
| 0.08333333332670 | 0.13043999673400 | 0.33333333333400 | F | F | F |
| 0.08333333332670 | 0.13043999673400 | 0.66666666666600 | F | F | F |
| 0.41666666666100 | 0.13043999673400 | 0.00000000000000 | F | F | F |
| 0.41666666666100 | 0.13043999673400 | 0.33333333333400 | F | F | F |
| 0.41666666666100 | 0.13043999673400 | 0.66666666666600 | F | F | F |
| 0.7499999999300  | 0.13043999673400 | 0.00000000000000 | F | F | F |
| 0.7499999999300  | 0.13043999673400 | 0.33333333333400 | F | F | F |
| 0.7499999999300  | 0.13043999673400 | 0.66666666666600 | F | F | F |

|                  |                  |                  |   |   |   |
|------------------|------------------|------------------|---|---|---|
| 0.0833333332670  | 0.13043999673400 | 0.22222334138000 | F | F | F |
| 0.0833333332670  | 0.13043999673400 | 0.55555667471300 | F | F | F |
| 0.0833333332670  | 0.13043999673400 | 0.88889000804700 | F | F | F |
| 0.4166666666100  | 0.13043999673400 | 0.22222334138000 | F | F | F |
| 0.4166666666100  | 0.13043999673400 | 0.55555667471300 | F | F | F |
| 0.4166666666100  | 0.13043999673400 | 0.88889000804700 | F | F | F |
| 0.7499999999300  | 0.13043999673400 | 0.22222334138000 | F | F | F |
| 0.7499999999300  | 0.13043999673400 | 0.55555667471300 | F | F | F |
| 0.7499999999300  | 0.13043999673400 | 0.88889000804700 | F | F | F |
| 0.0833333332670  | 0.13043999673400 | 0.11111000180100 | F | F | F |
| 0.0833333332670  | 0.13043999673400 | 0.44444333513300 | F | F | F |
| 0.0833333332670  | 0.13043999673400 | 0.77777666846700 | F | F | F |
| 0.4166666666100  | 0.13043999673400 | 0.11111000180100 | F | F | F |
| 0.4166666666100  | 0.13043999673400 | 0.44444333513300 | F | F | F |
| 0.4166666666100  | 0.13043999673400 | 0.77777666846700 | F | F | F |
| 0.7499999999300  | 0.13043999673400 | 0.11111000180100 | F | F | F |
| 0.7499999999300  | 0.13043999673400 | 0.44444333513300 | F | F | F |
| 0.7499999999300  | 0.13043999673400 | 0.77777666846700 | F | F | F |
| 0.2500000008900  | 0.13043999673400 | 0.00000000000000 | F | F | F |
| 0.2500000008900  | 0.13043999673400 | 0.33333333333400 | F | F | F |
| 0.2500000008900  | 0.13043999673400 | 0.66666666666600 | F | F | F |
| 0.58333333342100 | 0.13043999673400 | 0.00000000000000 | F | F | F |
| 0.58333333342100 | 0.13043999673400 | 0.33333333333400 | F | F | F |
| 0.58333333342100 | 0.13043999673400 | 0.66666666666600 | F | F | F |
| 0.91666666675500 | 0.13043999673400 | 0.00000000000000 | F | F | F |
| 0.91666666675500 | 0.13043999673400 | 0.33333333333400 | F | F | F |
| 0.91666666675500 | 0.13043999673400 | 0.66666666666600 | F | F | F |
| 0.2500000008900  | 0.13043999673400 | 0.22222334138000 | F | F | F |
| 0.2500000008900  | 0.13043999673400 | 0.55555667471300 | F | F | F |
| 0.2500000008900  | 0.13043999673400 | 0.88889000804700 | F | F | F |

|                  |                  |                  |   |   |   |
|------------------|------------------|------------------|---|---|---|
| 0.58333333342100 | 0.13043999673400 | 0.22222334138000 | F | F | F |
| 0.58333333342100 | 0.13043999673400 | 0.55555667471300 | F | F | F |
| 0.58333333342100 | 0.13043999673400 | 0.88889000804700 | F | F | F |
| 0.91666666675500 | 0.13043999673400 | 0.22222334138000 | F | F | F |
| 0.91666666675500 | 0.13043999673400 | 0.55555667471300 | F | F | F |
| 0.91666666675500 | 0.13043999673400 | 0.88889000804700 | F | F | F |
| 0.25000000008900 | 0.13043999673400 | 0.11111000180100 | F | F | F |
| 0.25000000008900 | 0.13043999673400 | 0.44444333513300 | F | F | F |
| 0.25000000008900 | 0.13043999673400 | 0.77777666846700 | F | F | F |
| 0.58333333342100 | 0.13043999673400 | 0.11111000180100 | F | F | F |
| 0.58333333342100 | 0.13043999673400 | 0.44444333513300 | F | F | F |
| 0.58333333342100 | 0.13043999673400 | 0.77777666846700 | F | F | F |
| 0.91666666675500 | 0.13043999673400 | 0.11111000180100 | F | F | F |
| 0.91666666675500 | 0.13043999673400 | 0.44444333513300 | F | F | F |
| 0.91666666675500 | 0.13043999673400 | 0.77777666846700 | F | F | F |
| 0.12529373944300 | 0.19649082482700 | 0.05519741485780 | T | T | T |
| 0.12636021564900 | 0.19600917743500 | 0.38935281835300 | T | T | T |
| 0.12613997330300 | 0.19585426253100 | 0.72333809981200 | T | T | T |
| 0.45941070153800 | 0.19588120059200 | 0.05674883637620 | T | T | T |
| 0.45946476632100 | 0.19585232633400 | 0.39006123214000 | T | T | T |
| 0.45946889031400 | 0.19585586337600 | 0.72336467228300 | T | T | T |
| 0.79280287176500 | 0.19586451194700 | 0.05673452175730 | T | T | T |
| 0.79279776835600 | 0.19585985000600 | 0.39007198106400 | T | T | T |
| 0.79280355449600 | 0.19585524257100 | 0.72337227331000 | T | T | T |
| 0.12534684985500 | 0.19654047079200 | 0.27670241895600 | T | T | T |
| 0.12508716436800 | 0.19602651345900 | 0.61088621216200 | T | T | T |
| 0.12501201127800 | 0.19602783010300 | 0.94398103815300 | T | T | T |
| 0.45838861576800 | 0.19602464571800 | 0.27763800865100 | T | T | T |
| 0.45841971014300 | 0.19602177317200 | 0.61091227724800 | T | T | T |
| 0.45841693793400 | 0.19602071746900 | 0.94426474716800 | T | T | T |

|                  |                  |                  |   |   |   |
|------------------|------------------|------------------|---|---|---|
| 0.79175639007000 | 0.19602072287000 | 0.27763180280100 | T | T | T |
| 0.79175440822500 | 0.19602094236400 | 0.61092268668100 | T | T | T |
| 0.79175000525200 | 0.19602207432800 | 0.94426390435000 | T | T | T |
| 0.12561706042200 | 0.19638466362700 | 0.16605088034500 | T | T | T |
| 0.12535057797600 | 0.19897148305000 | 0.49679037735300 | T | T | T |
| 0.12535258683500 | 0.19895961035500 | 0.83012625049500 | T | T | T |
| 0.45862037858600 | 0.19897538998200 | 0.16351823175800 | T | T | T |
| 0.45868025131500 | 0.19896761394300 | 0.49680982005200 | T | T | T |
| 0.45868376471700 | 0.19897457064000 | 0.83014201058200 | T | T | T |
| 0.79200305223900 | 0.19898268234900 | 0.16349671306300 | T | T | T |
| 0.79201388970700 | 0.19897162076800 | 0.49682096738100 | T | T | T |
| 0.79200974037400 | 0.19896994781300 | 0.83014687443800 | T | T | T |
| 0.29214128918500 | 0.19654276805600 | 0.05495793956180 | T | T | T |
| 0.29214739333700 | 0.19627397283600 | 0.38805069413800 | T | T | T |
| 0.29215784491700 | 0.19628107235800 | 0.72144702057700 | T | T | T |
| 0.62548714251100 | 0.19629514582900 | 0.05481419067140 | T | T | T |
| 0.62549083758400 | 0.19628925245700 | 0.38814613127300 | T | T | T |
| 0.62548999832000 | 0.19628599928600 | 0.72146240178500 | T | T | T |
| 0.95880024480100 | 0.19629656341700 | 0.05479682991400 | T | T | T |
| 0.95882771151300 | 0.19627956699100 | 0.38815172096800 | T | T | T |
| 0.95882195666100 | 0.19628168242300 | 0.72145341261600 | T | T | T |
| 0.29130713659800 | 0.19701425294500 | 0.27642014599900 | T | T | T |
| 0.29187535825200 | 0.19625366828900 | 0.61093259914600 | T | T | T |
| 0.29189606111500 | 0.19622785177300 | 0.94427113144600 | T | T | T |
| 0.62520412933300 | 0.19626031921200 | 0.27764454272200 | T | T | T |
| 0.62520599935000 | 0.19625627506100 | 0.61095366965000 | T | T | T |
| 0.62520426628300 | 0.19625985937300 | 0.94429621732700 | T | T | T |
| 0.95855357001600 | 0.19629278035700 | 0.27765075431300 | T | T | T |
| 0.95853800569500 | 0.19625261245800 | 0.61094898180000 | T | T | T |
| 0.95852919706600 | 0.19625410382900 | 0.94426280562500 | T | T | T |

|                  |                  |                  |   |   |   |
|------------------|------------------|------------------|---|---|---|
| 0.29149647494300 | 0.19623258104000 | 0.16599273625600 | T | T | T |
| 0.29200311407400 | 0.19646662631900 | 0.49905936407700 | T | T | T |
| 0.29200473973800 | 0.19646644610000 | 0.83239909829500 | T | T | T |
| 0.62533048541400 | 0.19647568087700 | 0.16576312669900 | T | T | T |
| 0.62533368230000 | 0.19647004396900 | 0.49908345058900 | T | T | T |
| 0.62533382373500 | 0.19647053779500 | 0.83241433665400 | T | T | T |
| 0.95869562277700 | 0.19646955887100 | 0.16579310599000 | T | T | T |
| 0.95866639765800 | 0.19646809268000 | 0.49907841257200 | T | T | T |
| 0.95866398383000 | 0.19646334797200 | 0.83240397547100 | T | T | T |
| 0.04273583241220 | 0.19643561235500 | 0.05506213304150 | T | T | T |
| 0.04303452676220 | 0.19642260359000 | 0.38854777496200 | T | T | T |
| 0.04298552397960 | 0.19640701628500 | 0.72185274052700 | T | T | T |
| 0.37623720981100 | 0.19648462874400 | 0.05524758222500 | T | T | T |
| 0.37629135575900 | 0.19642308228600 | 0.38851166630100 | T | T | T |
| 0.37631823770600 | 0.19640496564200 | 0.72185352734400 | T | T | T |
| 0.70964786322600 | 0.19641436318300 | 0.05519994889190 | T | T | T |
| 0.70965032909600 | 0.19641332783800 | 0.38853879771800 | T | T | T |
| 0.70965138043300 | 0.19640895506000 | 0.72185988601700 | T | T | T |
| 0.04159185426770 | 0.19637923250600 | 0.27752463289300 | T | T | T |
| 0.04143667819790 | 0.19645750811400 | 0.60997588621400 | T | T | T |
| 0.04139911845960 | 0.19642574132900 | 0.94327634664900 | T | T | T |
| 0.37463170630900 | 0.19642618730500 | 0.27703306846700 | T | T | T |
| 0.37477505630100 | 0.19645701782400 | 0.60997964100000 | T | T | T |
| 0.37477582968400 | 0.19644493175900 | 0.94334442331600 | T | T | T |
| 0.70811341564000 | 0.19645961228300 | 0.27671441636000 | T | T | T |
| 0.70810965790400 | 0.19645863196900 | 0.61000374597300 | T | T | T |
| 0.70810807321200 | 0.19646123012300 | 0.94334542400300 | T | T | T |
| 0.04158474460810 | 0.19650880045500 | 0.16598194693100 | T | T | T |
| 0.04148804488590 | 0.19651264991900 | 0.49911789641600 | T | T | T |
| 0.04148050163910 | 0.19649831229300 | 0.83244411441300 | T | T | T |



|                  |                  |                  |   |   |   |
|------------------|------------------|------------------|---|---|---|
| 0.37468523326100 | 0.19646305138000 | 0.16589638039100 | T | T | T |
| 0.37481857644200 | 0.19649864653700 | 0.49911769415800 | T | T | T |
| 0.37481864452500 | 0.19650279330300 | 0.83245733045400 | T | T | T |
| 0.70814823848000 | 0.19651052174300 | 0.16581264180000 | T | T | T |
| 0.70814937269300 | 0.19650481483100 | 0.49913522820300 | T | T | T |
| 0.70814905932800 | 0.19650568023600 | 0.83246403716700 | T | T | T |
| 0.20812055139800 | 0.19646039443600 | 0.05501090789250 | T | T | T |
| 0.20569209426100 | 0.19627396058800 | 0.38851949938300 | T | T | T |
| 0.20575978747800 | 0.19616568046100 | 0.72199676927400 | T | T | T |
| 0.53908919069800 | 0.19618408629800 | 0.05536014674540 | T | T | T |
| 0.53909315380100 | 0.19617449852600 | 0.38868304728600 | T | T | T |
| 0.53909603603700 | 0.19617143470500 | 0.72200810372700 | T | T | T |
| 0.87243334242600 | 0.19618924037200 | 0.05534776092830 | T | T | T |
| 0.87244007814700 | 0.19617460144900 | 0.38869588039300 | T | T | T |
| 0.87242541940600 | 0.19616823044400 | 0.72200523663300 | T | T | T |
| 0.20813571631700 | 0.19685160807100 | 0.27628442743900 | T | T | T |
| 0.20786758558900 | 0.19639604867900 | 0.61111204455600 | T | T | T |
| 0.20792332623700 | 0.19636458559100 | 0.94432664518200 | T | T | T |
| 0.54119545985800 | 0.19640030737200 | 0.27782202283300 | T | T | T |
| 0.54120105639300 | 0.19639622898200 | 0.61112764402200 | T | T | T |
| 0.54120019928300 | 0.19639847737000 | 0.94447334564000 | T | T | T |
| 0.87454861096700 | 0.19640221289600 | 0.27783498403400 | T | T | T |
| 0.87453494116100 | 0.19639387203300 | 0.61113026813600 | T | T | T |
| 0.87453006761800 | 0.19639659768700 | 0.94445825826200 | T | T | T |
| 0.20788391501800 | 0.19611511856200 | 0.16617611503600 | T | T | T |
| 0.20795393440500 | 0.19599691304900 | 0.49935042578900 | T | T | T |
| 0.20795626643200 | 0.19599043800100 | 0.83269371272300 | T | T | T |
| 0.54128978579500 | 0.19600817175900 | 0.16606842200500 | T | T | T |
| 0.54128795010600 | 0.19599774604600 | 0.49937832032600 | T | T | T |
| 0.54129091636000 | 0.19600061984900 | 0.83271285112400 | T | T | T |

|                  |                  |                  |   |   |   |
|------------------|------------------|------------------|---|---|---|
| 0.87464979855900 | 0.19599836459100 | 0.16607286101000 | T | T | T |
| 0.87462385914800 | 0.19600137673100 | 0.49938685824600 | T | T | T |
| 0.87461961131600 | 0.19599891417200 | 0.83270144057700 | T | T | T |
| 0.00055664954327 | 0.24501078326000 | 0.00751207336944 | T | T | T |
| 0.00072302434957 | 0.24505362842400 | 0.34094496519000 | T | T | T |
| 0.00066057432603 | 0.24499354806600 | 0.67421255741200 | T | T | T |
| 0.33405564291800 | 0.24505076442300 | 0.00751663098058 | T | T | T |
| 0.33378480886200 | 0.24487732503400 | 0.34071735824400 | T | T | T |
| 0.33400168810000 | 0.24499286057300 | 0.67420800178100 | T | T | T |
| 0.66731982223400 | 0.24502414418800 | 0.00754021322400 | T | T | T |
| 0.66732149628500 | 0.24501865779600 | 0.34088298956100 | T | T | T |
| 0.66732786906700 | 0.24500512385300 | 0.67421115856100 | T | T | T |
| 0.33246632334000 | 0.24517410084100 | 0.22990233736600 | T | T | T |
| 0.33243681527300 | 0.24499143879800 | 0.56327489588900 | T | T | T |
| 0.33245518799300 | 0.24498862906900 | 0.89662732082100 | T | T | T |
| 0.66577023040900 | 0.24501611068100 | 0.22994785629600 | T | T | T |
| 0.66576900105700 | 0.24500134360000 | 0.56328245784700 | T | T | T |
| 0.66576720453700 | 0.24501062028600 | 0.89661086714200 | T | T | T |
| 0.99948551377900 | 0.24501456504100 | 0.23008286416700 | T | T | T |
| 0.99910643016900 | 0.24499599159200 | 0.56327976011900 | T | T | T |
| 0.99908677514700 | 0.24497839725900 | 0.89662009364600 | T | T | T |
| 0.00131535680079 | 0.24495371655100 | 0.11788625545500 | T | T | T |
| 0.00116144143984 | 0.24485882664500 | 0.45126772552500 | T | T | T |
| 0.00114899642144 | 0.24484914669700 | 0.78459961961700 | T | T | T |
| 0.33398888552800 | 0.24527996099100 | 0.11822993036400 | T | T | T |
| 0.33448508113300 | 0.24484436803400 | 0.45125902378400 | T | T | T |
| 0.33449184324500 | 0.24485341105200 | 0.78459941968000 | T | T | T |
| 0.66781756187800 | 0.24487642964000 | 0.11792505237800 | T | T | T |
| 0.66781852385800 | 0.24486197965400 | 0.45126714512000 | T | T | T |
| 0.66781965332200 | 0.24486196698700 | 0.78459606836400 | T | T | T |

|                  |                  |                  |   |   |   |
|------------------|------------------|------------------|---|---|---|
| 0.16625190479400 | 0.24502958016300 | 0.00820513348443 | T | T | T |
| 0.16614205918900 | 0.24498817704500 | 0.34068652020700 | T | T | T |
| 0.16600580513200 | 0.24504928421000 | 0.67568612639300 | T | T | T |
| 0.49932856222700 | 0.24509410754800 | 0.00903457621436 | T | T | T |
| 0.49930698280100 | 0.24507137968900 | 0.34238238655500 | T | T | T |
| 0.49933459286800 | 0.24506159192500 | 0.67569536233200 | T | T | T |
| 0.83265370805400 | 0.24508270067000 | 0.00903204232792 | T | T | T |
| 0.83267342758800 | 0.24507693115600 | 0.34237956448900 | T | T | T |
| 0.83266896739300 | 0.24506228977900 | 0.67569777124000 | T | T | T |
| 0.16663585134600 | 0.25463969194700 | 0.22568130227400 | T | T | T |
| 0.16522552765500 | 0.24867082928700 | 0.55896205713400 | T | T | T |
| 0.16522892734600 | 0.24866992233000 | 0.89227801008500 | T | T | T |
| 0.49856433380400 | 0.24864565645500 | 0.22567587609400 | T | T | T |
| 0.49855350289000 | 0.24866704259100 | 0.55897358199000 | T | T | T |
| 0.49855958727200 | 0.24867596784800 | 0.89231095702800 | T | T | T |
| 0.83190956270700 | 0.24867142598100 | 0.22565812367800 | T | T | T |
| 0.83189393384200 | 0.24866218803700 | 0.55898518298000 | T | T | T |
| 0.83188545066800 | 0.24866801525200 | 0.89230982208400 | T | T | T |
| 0.16725300423300 | 0.24763224794400 | 0.11812110581800 | T | T | T |
| 0.16305699201000 | 0.27971895532100 | 0.43457273431000 | T | T | T |
| 0.16304788197300 | 0.27974538762300 | 0.76793002777700 | T | T | T |
| 0.49636481106500 | 0.27983708501600 | 0.10123686474600 | T | T | T |
| 0.49637337010100 | 0.27977939906500 | 0.43459636184000 | T | T | T |
| 0.49638457938000 | 0.27977466497500 | 0.76792060650300 | T | T | T |
| 0.82972759220900 | 0.27982025668100 | 0.10124068961400 | T | T | T |
| 0.82972586712700 | 0.27978678970300 | 0.43459243248100 | T | T | T |
| 0.82971707513800 | 0.27977084970200 | 0.76792417975900 | T | T | T |
| 0.08331793900650 | 0.24486919798800 | 0.00735439359320 | T | T | T |
| 0.08358894339420 | 0.24487227431300 | 0.34080135566800 | T | T | T |
| 0.08344732320390 | 0.24481428674500 | 0.67420543940300 | T | T | T |

|                  |                  |                  |   |   |   |
|------------------|------------------|------------------|---|---|---|
| 0.41679009377700 | 0.24486221508200 | 0.00753780527153 | T | T | T |
| 0.41674038234100 | 0.24483027971800 | 0.34091161558000 | T | T | T |
| 0.41678184951500 | 0.24482091686600 | 0.67420771012900 | T | T | T |
| 0.75010829637800 | 0.24484238713700 | 0.00754147279336 | T | T | T |
| 0.75011585535900 | 0.24484030388800 | 0.34088533171500 | T | T | T |
| 0.75011466794900 | 0.24482735957900 | 0.67421134156600 | T | T | T |
| 0.08310315225740 | 0.24533243529600 | 0.23004746294400 | T | T | T |
| 0.08122473841830 | 0.24472844918400 | 0.56160907042100 | T | T | T |
| 0.08119837423760 | 0.24470975285800 | 0.89493164133900 | T | T | T |
| 0.41453063691900 | 0.24471369151000 | 0.22832013411700 | T | T | T |
| 0.41455275123000 | 0.24473398864900 | 0.56161069041100 | T | T | T |
| 0.41456534950500 | 0.24474242828400 | 0.89494975509700 | T | T | T |
| 0.74788920979100 | 0.24475504037300 | 0.22828319813000 | T | T | T |
| 0.74789050721600 | 0.24473801207000 | 0.56161572727700 | T | T | T |
| 0.74788342891900 | 0.24474336044200 | 0.89494553685100 | T | T | T |
| 0.08362215536240 | 0.24719583408200 | 0.11930818450700 | T | T | T |
| 0.08369050662530 | 0.24820300897900 | 0.45348532351800 | T | T | T |
| 0.08366772613720 | 0.24823705236000 | 0.78689505983000 | T | T | T |
| 0.41684363679000 | 0.24832702144100 | 0.12020349314400 | T | T | T |
| 0.41699323231100 | 0.24825054347600 | 0.45355658575600 | T | T | T |
| 0.41700463924900 | 0.24824898436300 | 0.78688479424900 | T | T | T |
| 0.75033908109100 | 0.24827921626300 | 0.12020468996300 | T | T | T |
| 0.75034166560800 | 0.24826315851600 | 0.45356396906000 | T | T | T |
| 0.75033562192400 | 0.24825656671600 | 0.78688680024800 | T | T | T |
| 0.25009918725400 | 0.24497162715900 | 0.00755977964545 | T | T | T |
| 0.24982718046000 | 0.24473908983500 | 0.34068234319500 | T | T | T |
| 0.24987514815300 | 0.24487675682400 | 0.67435123368200 | T | T | T |
| 0.58319810554200 | 0.24491034242400 | 0.00768566662858 | T | T | T |
| 0.58319240737200 | 0.24489929068300 | 0.34103182406700 | T | T | T |
| 0.58320331612400 | 0.24488944641100 | 0.67435548016000 | T | T | T |

|                  |                  |                  |   |   |   |
|------------------|------------------|------------------|---|---|---|
| 0.91650412102100 | 0.24489938373500 | 0.00768248440781 | T | T | T |
| 0.91656113059500 | 0.24490386374600 | 0.34103962144000 | T | T | T |
| 0.91653677624700 | 0.24488334148100 | 0.67435842397100 | T | T | T |
| 0.24978497167700 | 0.25155745450800 | 0.22627065352400 | T | T | T |
| 0.25008514414900 | 0.24482435902900 | 0.56313331212200 | T | T | T |
| 0.25010327334000 | 0.24481057750500 | 0.89647429847400 | T | T | T |
| 0.58341862319000 | 0.24486258720000 | 0.22979982334900 | T | T | T |
| 0.58341553733000 | 0.24484006253200 | 0.56313799795100 | T | T | T |
| 0.58341626097400 | 0.24485039192700 | 0.89646589461600 | T | T | T |
| 0.91681305633900 | 0.24489013892400 | 0.22982134395800 | T | T | T |
| 0.91675213054000 | 0.24483595392600 | 0.56314022844400 | T | T | T |
| 0.91674041583300 | 0.24483753616700 | 0.89646798244700 | T | T | T |
| 0.25019350472100 | 0.24489691043700 | 0.11783969875700 | T | T | T |
| 0.25444180558900 | 0.24448700280200 | 0.44900877004300 | T | T | T |
| 0.25443254358600 | 0.24450692576700 | 0.78236989695400 | T | T | T |
| 0.58774693986300 | 0.24456165981600 | 0.11570613331800 | T | T | T |
| 0.58775190555700 | 0.24453310907500 | 0.44904417955600 | T | T | T |
| 0.58776044347100 | 0.24453107603300 | 0.78237122585500 | T | T | T |
| 0.92118984566700 | 0.24461528176400 | 0.11570093639200 | T | T | T |
| 0.92108830775900 | 0.24453020889800 | 0.44904630618200 | T | T | T |
| 0.92109210537700 | 0.24452074324400 | 0.78237446707900 | T | T | T |
| 0.12482288694100 | 0.99537537646200 | 0.03085927512970 | T | T | T |
| 0.12504443011900 | 0.99558849638000 | 0.36419399442500 | T | T | T |
| 0.12464677393200 | 0.99532912306900 | 0.69809672802500 | T | T | T |
| 0.45793164642400 | 0.99527575863000 | 0.03139256727620 | T | T | T |
| 0.45798204535300 | 0.99531891091600 | 0.36478006268000 | T | T | T |
| 0.45797013464600 | 0.99531446780200 | 0.69809607713700 | T | T | T |
| 0.79131942229700 | 0.99529209199900 | 0.03141351737120 | T | T | T |
| 0.79129476840800 | 0.99532174488200 | 0.36473567257100 | T | T | T |
| 0.79130849267400 | 0.99531493153400 | 0.69809379622000 | T | T | T |

|                  |                  |                  |   |   |   |
|------------------|------------------|------------------|---|---|---|
| 0.12481022083300 | 0.99670030248800 | 0.25261739691700 | T | T | T |
| 0.12315924226300 | 0.99852302981200 | 0.58533358843700 | T | T | T |
| 0.12315758684900 | 0.99849765719800 | 0.91866758662700 | T | T | T |
| 0.45657776135000 | 0.99859161895500 | 0.25192604931200 | T | T | T |
| 0.45650995869100 | 0.99852660436300 | 0.58532692179700 | T | T | T |
| 0.45648285178200 | 0.99851859056000 | 0.91864049261200 | T | T | T |
| 0.78986397911500 | 0.99855861835100 | 0.25193575615300 | T | T | T |
| 0.78983782327100 | 0.99853380406300 | 0.58531213762200 | T | T | T |
| 0.78985438482800 | 0.99852811354400 | 0.91865017432700 | T | T | T |
| 0.12548546869000 | 0.99532015817100 | 0.14228184793900 | T | T | T |
| 0.12551714842300 | 0.99514923310200 | 0.47542396487800 | T | T | T |
| 0.12558147875500 | 0.99515495416000 | 0.80875377213400 | T | T | T |
| 0.45881593637300 | 0.99512397197800 | 0.14190933886800 | T | T | T |
| 0.45896692792200 | 0.99518574393600 | 0.47534601507000 | T | T | T |
| 0.45890727646300 | 0.99516622235200 | 0.80868051789900 | T | T | T |
| 0.79233601508400 | 0.99520484811300 | 0.14191585562400 | T | T | T |
| 0.79228269435700 | 0.99518675011900 | 0.47531872355700 | T | T | T |
| 0.79228415930000 | 0.99517600673600 | 0.80867629206100 | T | T | T |
| 0.29192117703600 | 0.99557120214800 | 0.03048456003850 | T | T | T |
| 0.29190964744800 | 0.99579004538300 | 0.36380036045100 | T | T | T |
| 0.29197282940600 | 0.99570840687000 | 0.69722936237500 | T | T | T |
| 0.62531670590900 | 0.99570021467200 | 0.03051460429730 | T | T | T |
| 0.62532894532000 | 0.99572019273800 | 0.36385080569000 | T | T | T |
| 0.62531382712500 | 0.99570564253300 | 0.69721016596400 | T | T | T |
| 0.95865690030000 | 0.99563635928000 | 0.03055505548270 | T | T | T |
| 0.95863050598800 | 0.99573444944400 | 0.36383949986700 | T | T | T |
| 0.95864392676300 | 0.99570764570500 | 0.69722784082800 | T | T | T |
| 0.29071917204700 | 0.99515669497700 | 0.25216741065500 | T | T | T |
| 0.29098845465800 | 0.99504172176800 | 0.58694881332400 | T | T | T |
| 0.29092393299300 | 0.99506122694200 | 0.92031291894000 | T | T | T |

|                  |                  |                  |   |   |   |
|------------------|------------------|------------------|---|---|---|
| 0.62435147103100 | 0.99505316862500 | 0.25354925608700 | T | T | T |
| 0.62432480900400 | 0.99504405981200 | 0.58692275188500 | T | T | T |
| 0.62432180170300 | 0.99502963268200 | 0.92024119013700 | T | T | T |
| 0.95781304305900 | 0.99512133507000 | 0.25345582033500 | T | T | T |
| 0.95763894454200 | 0.99504694225900 | 0.58693542510200 | T | T | T |
| 0.95768762680300 | 0.99503511824400 | 0.92027676394900 | T | T | T |
| 0.29151805346800 | 0.99588499009200 | 0.14127160447300 | T | T | T |
| 0.29294511977000 | 0.99575858304200 | 0.47465469246600 | T | T | T |
| 0.29291496228300 | 0.99574458462900 | 0.80798658040500 | T | T | T |
| 0.62628970590000 | 0.99572708218700 | 0.14124560079100 | T | T | T |
| 0.62628135234900 | 0.99573871336100 | 0.47461475797800 | T | T | T |
| 0.62627327093100 | 0.99573104349100 | 0.80795446925000 | T | T | T |
| 0.95989654842300 | 0.99562160163600 | 0.14124758288800 | T | T | T |
| 0.95957556457900 | 0.99574835867800 | 0.47462812380600 | T | T | T |
| 0.95961353551000 | 0.99574404296300 | 0.80798289343200 | T | T | T |
| 0.04195858295190 | 0.99535408027700 | 0.03089741200640 | T | T | T |
| 0.04206580273890 | 0.99545127148500 | 0.36419637658500 | T | T | T |
| 0.04200985613010 | 0.99539529826200 | 0.69762085136000 | T | T | T |
| 0.37528170355400 | 0.99532808610700 | 0.03088339069050 | T | T | T |
| 0.37528382729400 | 0.99549536680300 | 0.36418394549900 | T | T | T |
| 0.37534054742300 | 0.99538908056600 | 0.69761431453700 | T | T | T |
| 0.70869164365600 | 0.99537184600300 | 0.03089882213570 | T | T | T |
| 0.70868582078400 | 0.99539013982300 | 0.36422749811500 | T | T | T |
| 0.70868130530600 | 0.99538460100200 | 0.69759619359000 | T | T | T |
| 0.04106312436130 | 0.99542983975000 | 0.25303465673000 | T | T | T |
| 0.04067505642460 | 0.99495321290500 | 0.58625205827500 | T | T | T |
| 0.04072628765000 | 0.99499207580100 | 0.91963593832900 | T | T | T |
| 0.37415043126600 | 0.99512437917300 | 0.25283483050400 | T | T | T |
| 0.37402919985100 | 0.99495297476900 | 0.58625355274600 | T | T | T |
| 0.37398654739800 | 0.99494013367600 | 0.91957857384600 | T | T | T |

|                  |                  |                  |   |   |   |
|------------------|------------------|------------------|---|---|---|
| 0.70737910195900 | 0.99495984867600 | 0.25285955640100 | T | T | T |
| 0.70736034677900 | 0.99495722021100 | 0.58622922087200 | T | T | T |
| 0.70736769906600 | 0.99494321723000 | 0.91955520956500 | T | T | T |
| 0.04199078616830 | 0.99512330387200 | 0.14206219264600 | T | T | T |
| 0.04128458046960 | 0.99519123385500 | 0.47556145694800 | T | T | T |
| 0.04130558039720 | 0.99519146918000 | 0.80892802216000 | T | T | T |
| 0.37436493746400 | 0.99495321959000 | 0.14228060327400 | T | T | T |
| 0.37464743008200 | 0.99518801383000 | 0.47559125291300 | T | T | T |
| 0.37461676377000 | 0.99517763355300 | 0.80891225356600 | T | T | T |
| 0.70798815739300 | 0.99516506399500 | 0.14219035353400 | T | T | T |
| 0.70797223639100 | 0.99517722288500 | 0.47555112462600 | T | T | T |
| 0.70797330965200 | 0.99517115029300 | 0.80889465181600 | T | T | T |
| 0.20813244794600 | 0.99546740768600 | 0.03058904949300 | T | T | T |
| 0.20822283324300 | 0.99569812343900 | 0.36385040757900 | T | T | T |
| 0.20838214074900 | 0.99532796643000 | 0.69768360187100 | T | T | T |
| 0.54171372695100 | 0.99528684587800 | 0.03097223983660 | T | T | T |
| 0.54174872967600 | 0.99531583689900 | 0.36432755010200 | T | T | T |
| 0.54172511657800 | 0.99530983141700 | 0.69767320286900 | T | T | T |
| 0.87508670004200 | 0.99527343219500 | 0.03099325807370 | T | T | T |
| 0.87505717506900 | 0.99532156452000 | 0.36430612398300 | T | T | T |
| 0.87506294942600 | 0.99531497053600 | 0.69768260629300 | T | T | T |
| 0.20816693429500 | 0.99752598160400 | 0.25162589500100 | T | T | T |
| 0.20653802332300 | 0.99741222975500 | 0.58464357353400 | T | T | T |
| 0.20649618255200 | 0.99742201627800 | 0.91798915789600 | T | T | T |
| 0.53993662406400 | 0.99741812009300 | 0.25123473699100 | T | T | T |
| 0.53988303373900 | 0.99741140248000 | 0.58461443451800 | T | T | T |
| 0.53987075240200 | 0.99739942668800 | 0.91793747904400 | T | T | T |
| 0.87326360763200 | 0.99743873100700 | 0.25120974736400 | T | T | T |
| 0.87320471195700 | 0.99741141973300 | 0.58462283719500 | T | T | T |
| 0.87324349265500 | 0.99739841642900 | 0.91795233726600 | T | T | T |



|                  |                  |                  |   |   |   |
|------------------|------------------|------------------|---|---|---|
| 0.20915486227900 | 0.99584206289700 | 0.14169212278300 | T | T | T |
| 0.20890565715300 | 0.00624140989233 | 0.46892989676300 | T | T | T |
| 0.20887199241000 | 0.00623133658355 | 0.80226458343500 | T | T | T |
| 0.54222977016800 | 0.00623125110022 | 0.13551865247000 | T | T | T |
| 0.54222694740700 | 0.00624205671616 | 0.46889582790300 | T | T | T |
| 0.54221892608800 | 0.00623162454746 | 0.80222526800200 | T | T | T |
| 0.87574571694900 | 0.00620321464219 | 0.13553970125800 | T | T | T |
| 0.87552605861700 | 0.00624030519212 | 0.46888861727700 | T | T | T |
| 0.87556583843100 | 0.00622850870952 | 0.80223482940800 | T | T | T |
| 0.00047231560462 | 0.06674074547680 | 0.08252739649500 | T | T | T |
| 0.00062364515911 | 0.06677727804060 | 0.41575765403600 | T | T | T |
| 0.00064147878277 | 0.06678319313520 | 0.74910608735300 | T | T | T |
| 0.33378545303500 | 0.06649795763740 | 0.08257434223280 | T | T | T |
| 0.33395204389800 | 0.06677855195560 | 0.41575982299200 | T | T | T |
| 0.33395040694400 | 0.06678233546220 | 0.74910306804100 | T | T | T |
| 0.66732429732000 | 0.06676626635140 | 0.08240921407980 | T | T | T |
| 0.66731726234100 | 0.06677252579010 | 0.41575346938800 | T | T | T |
| 0.66730745316100 | 0.06677626992310 | 0.74909400199100 | T | T | T |
| 0.00014990857955 | 0.06640637404890 | 0.30509006326600 | T | T | T |
| 0.00024666770032 | 0.06634018534590 | 0.63837113643500 | T | T | T |
| 0.00028434245906 | 0.06636593849810 | 0.97170093389500 | T | T | T |
| 0.33316185493800 | 0.06627762607760 | 0.30472651989100 | T | T | T |
| 0.33357973749300 | 0.06634307551210 | 0.63836915179400 | T | T | T |
| 0.33350958776900 | 0.06634876715240 | 0.97170545242200 | T | T | T |
| 0.66693284481800 | 0.06633065328920 | 0.30501016721600 | T | T | T |
| 0.66691962979400 | 0.06633682532920 | 0.63836028439600 | T | T | T |
| 0.66692726467500 | 0.06632889883330 | 0.97168202367700 | T | T | T |
| 0.33319204735600 | 0.06627362405500 | 0.19393245875400 | T | T | T |
| 0.33315982314600 | 0.06629805122070 | 0.52744744564400 | T | T | T |
| 0.33311726261900 | 0.06628912657830 | 0.86078160570600 | T | T | T |

|                  |                  |                  |   |   |   |
|------------------|------------------|------------------|---|---|---|
| 0.66650893627100 | 0.06627904800290 | 0.19407320660500 | T | T | T |
| 0.66649356377100 | 0.06628660731650 | 0.52742964898600 | T | T | T |
| 0.66649538255200 | 0.06628638188210 | 0.86076236526600 | T | T | T |
| 0.99984664651100 | 0.06616571559220 | 0.19400113422000 | T | T | T |
| 0.99980985166700 | 0.06629267529380 | 0.52743736209400 | T | T | T |
| 0.99984890968200 | 0.06629452377830 | 0.86078453722300 | T | T | T |
| 0.16686193251900 | 0.06605594848620 | 0.08315920253400 | T | T | T |
| 0.16698030688100 | 0.06311567420630 | 0.41890096940400 | T | T | T |
| 0.16698029061900 | 0.06312961788670 | 0.75227429742100 | T | T | T |
| 0.50027726936600 | 0.06312516838960 | 0.08556514012190 | T | T | T |
| 0.50034654088300 | 0.06312068906170 | 0.41894246703900 | T | T | T |
| 0.50031242237600 | 0.06312408524580 | 0.75226417945300 | T | T | T |
| 0.83368710832700 | 0.06311576188760 | 0.08559177283330 | T | T | T |
| 0.83364669394700 | 0.06312663024470 | 0.41891912124600 | T | T | T |
| 0.83366108675900 | 0.06312335369700 | 0.75227017423200 | T | T | T |
| 0.16675969841200 | 0.06642259052850 | 0.30476213198700 | T | T | T |
| 0.16637233456500 | 0.06572745860340 | 0.63886773107100 | T | T | T |
| 0.16631773097200 | 0.06621874335980 | 0.97179534686600 | T | T | T |
| 0.49973343236900 | 0.06568904555090 | 0.30553092384200 | T | T | T |
| 0.49971353195500 | 0.06570995009280 | 0.63886995486700 | T | T | T |
| 0.49969501118100 | 0.06569407274400 | 0.97219195854500 | T | T | T |
| 0.83304673162100 | 0.06568439306530 | 0.30551851446500 | T | T | T |
| 0.83304847325000 | 0.06570619876670 | 0.63887182519600 | T | T | T |
| 0.83307668426800 | 0.06570141259370 | 0.97220071867200 | T | T | T |
| 0.16658957125600 | 0.06691063018280 | 0.19405429822700 | T | T | T |
| 0.16570313942300 | 0.06814986790950 | 0.52680591172100 | T | T | T |
| 0.16569705018800 | 0.06816590635820 | 0.86014903235800 | T | T | T |
| 0.49905439942200 | 0.06810634637830 | 0.19340390825200 | T | T | T |
| 0.49904934883100 | 0.06814806699990 | 0.52679504960000 | T | T | T |
| 0.49903164296400 | 0.06813686475060 | 0.86012002564400 | T | T | T |

|                  |                  |                  |   |   |   |
|------------------|------------------|------------------|---|---|---|
| 0.83239861703300 | 0.06811720042210 | 0.19341148251300 | T | T | T |
| 0.83237056097100 | 0.06814042139580 | 0.52678998392500 | T | T | T |
| 0.83239389211300 | 0.06814164529610 | 0.86012749859500 | T | T | T |
| 0.08368818926670 | 0.06610309623840 | 0.08311204428400 | T | T | T |
| 0.08444708318170 | 0.06563890171170 | 0.41670425015500 | T | T | T |
| 0.08438759629780 | 0.06567295499190 | 0.75010991429300 | T | T | T |
| 0.41760321479900 | 0.06552765569410 | 0.08346012809820 | T | T | T |
| 0.41771524983300 | 0.06567125176210 | 0.41676725801100 | T | T | T |
| 0.41769570012200 | 0.06567136061860 | 0.75010196584800 | T | T | T |
| 0.75105436545800 | 0.06563838748240 | 0.08341849482720 | T | T | T |
| 0.75103581102600 | 0.06565300593450 | 0.41676025720200 | T | T | T |
| 0.75104994436100 | 0.06566034180300 | 0.75009979733600 | T | T | T |
| 0.08336200602770 | 0.06651292298720 | 0.30479755897700 | T | T | T |
| 0.08299297671770 | 0.06644259945670 | 0.63824504447300 | T | T | T |
| 0.08302577806130 | 0.06651154039180 | 0.97158809324300 | T | T | T |
| 0.41637033895800 | 0.06645523056460 | 0.30492892567900 | T | T | T |
| 0.41633064172700 | 0.06644190674940 | 0.63824308547900 | T | T | T |
| 0.41628988582600 | 0.06643203433530 | 0.97156392921100 | T | T | T |
| 0.74967628649700 | 0.06643363885700 | 0.30488624015400 | T | T | T |
| 0.74967077070600 | 0.06643798138160 | 0.63823750546900 | T | T | T |
| 0.74968613092100 | 0.06643583408780 | 0.97156407843500 | T | T | T |
| 0.08328106879050 | 0.06611718577210 | 0.19385187873500 | T | T | T |
| 0.08354742014170 | 0.06718035785550 | 0.52666764091300 | T | T | T |
| 0.08357237951930 | 0.06718687432910 | 0.86000348172600 | T | T | T |
| 0.41692439688800 | 0.06712521856570 | 0.19324378674100 | T | T | T |
| 0.41690033360600 | 0.06717725685300 | 0.52666151889900 | T | T | T |
| 0.41686693891200 | 0.06717088851070 | 0.85998929459200 | T | T | T |
| 0.75024193880000 | 0.06716047524230 | 0.19329216920600 | T | T | T |
| 0.75022592787100 | 0.06716905735040 | 0.52664676412100 | T | T | T |
| 0.75023882659300 | 0.06717108455080 | 0.85998480627600 | T | T | T |

|                  |                  |                  |   |   |   |
|------------------|------------------|------------------|---|---|---|
| 0.25010033074800 | 0.06669978867550 | 0.08236606731690 | T | T | T |
| 0.24997635458500 | 0.06850114615860 | 0.41446617033700 | T | T | T |
| 0.24996974559500 | 0.06851519235390 | 0.74784196371000 | T | T | T |
| 0.58331350309400 | 0.06849088943510 | 0.08115100557720 | T | T | T |
| 0.58332723914700 | 0.06850252737980 | 0.41449841923300 | T | T | T |
| 0.58331357137700 | 0.06850600459570 | 0.74783422648800 | T | T | T |
| 0.91669044089300 | 0.06845947885000 | 0.08117720159070 | T | T | T |
| 0.91662812620800 | 0.06850216091530 | 0.41449527998300 | T | T | T |
| 0.91665911434900 | 0.06851236942480 | 0.74784092348600 | T | T | T |
| 0.24990861053900 | 0.06650242627740 | 0.30460269461600 | T | T | T |
| 0.24994757141800 | 0.06623247939070 | 0.63831215725600 | T | T | T |
| 0.24983478716300 | 0.06628049988000 | 0.97164760191500 | T | T | T |
| 0.58330147462400 | 0.06621579936970 | 0.30495378781500 | T | T | T |
| 0.58328407459700 | 0.06622415822650 | 0.63830300047900 | T | T | T |
| 0.58328106865200 | 0.06621551320090 | 0.97162205668900 | T | T | T |
| 0.91660181574700 | 0.06621001553000 | 0.30493151581900 | T | T | T |
| 0.91661533134000 | 0.06622691812120 | 0.63830820375400 | T | T | T |
| 0.91666379979300 | 0.06622644514050 | 0.97163339037900 | T | T | T |
| 0.24995756243900 | 0.06783450083640 | 0.19339168662100 | T | T | T |
| 0.25023197422000 | 0.06625208884770 | 0.52741795340400 | T | T | T |
| 0.25020203898400 | 0.06624763504690 | 0.86075209627300 | T | T | T |
| 0.58359046701900 | 0.06623193788020 | 0.19404030616000 | T | T | T |
| 0.58357506268300 | 0.06624090195270 | 0.52740116798900 | T | T | T |
| 0.58356624877400 | 0.06623975240620 | 0.86073099003400 | T | T | T |
| 0.91693460349400 | 0.06619887144150 | 0.19401386850500 | T | T | T |
| 0.91689173381200 | 0.06624457979790 | 0.52740425309600 | T | T | T |
| 0.91692464193800 | 0.06624530035210 | 0.86074425538500 | T | T | T |
| 0.04166666667330 | 0.13043999673400 | 0.02777666599470 | F | F | F |
| 0.04166666667330 | 0.13043999673400 | 0.36110999932900 | F | F | F |
| 0.04166666667330 | 0.13043999673400 | 0.69444333266100 | F | F | F |

|                  |                  |                  |   |   |   |
|------------------|------------------|------------------|---|---|---|
| 0.37500000000700 | 0.13043999673400 | 0.02777666599470 | F | F | F |
| 0.37500000000700 | 0.13043999673400 | 0.36110999932900 | F | F | F |
| 0.37500000000700 | 0.13043999673400 | 0.69444333266100 | F | F | F |
| 0.70833333334100 | 0.13043999673400 | 0.02777666599470 | F | F | F |
| 0.70833333334100 | 0.13043999673400 | 0.36110999932900 | F | F | F |
| 0.70833333334100 | 0.13043999673400 | 0.69444333266100 | F | F | F |
| 0.04166666667330 | 0.13043999673400 | 0.24999999994900 | F | F | F |
| 0.04166666667330 | 0.13043999673400 | 0.58333333328300 | F | F | F |
| 0.04166666667330 | 0.13043999673400 | 0.91666666661700 | F | F | F |
| 0.37500000000700 | 0.13043999673400 | 0.24999999994900 | F | F | F |
| 0.37500000000700 | 0.13043999673400 | 0.58333333328300 | F | F | F |
| 0.37500000000700 | 0.13043999673400 | 0.91666666661700 | F | F | F |
| 0.70833333334100 | 0.13043999673400 | 0.24999999994900 | F | F | F |
| 0.70833333334100 | 0.13043999673400 | 0.58333333328300 | F | F | F |
| 0.70833333334100 | 0.13043999673400 | 0.91666666661700 | F | F | F |
| 0.04166666667330 | 0.13043999673400 | 0.13888999819000 | F | F | F |
| 0.04166666667330 | 0.13043999673400 | 0.47222333152400 | F | F | F |
| 0.04166666667330 | 0.13043999673400 | 0.80555666485600 | F | F | F |
| 0.37500000000700 | 0.13043999673400 | 0.13888999819000 | F | F | F |
| 0.37500000000700 | 0.13043999673400 | 0.47222333152400 | F | F | F |
| 0.37500000000700 | 0.13043999673400 | 0.80555666485600 | F | F | F |
| 0.70833333334100 | 0.13043999673400 | 0.13888999819000 | F | F | F |
| 0.70833333334100 | 0.13043999673400 | 0.47222333152400 | F | F | F |
| 0.70833333334100 | 0.13043999673400 | 0.80555666485600 | F | F | F |
| 0.20833333332800 | 0.13043999673400 | 0.02777666599470 | F | F | F |
| 0.20833333332800 | 0.13043999673400 | 0.36110999932900 | F | F | F |
| 0.20833333332800 | 0.13043999673400 | 0.69444333266100 | F | F | F |
| 0.54166666666100 | 0.13043999673400 | 0.02777666599470 | F | F | F |
| 0.54166666666100 | 0.13043999673400 | 0.36110999932900 | F | F | F |
| 0.54166666666100 | 0.13043999673400 | 0.69444333266100 | F | F | F |

|                 |                  |                  |   |   |   |
|-----------------|------------------|------------------|---|---|---|
| 0.8749999999500 | 0.13043999673400 | 0.02777666599470 | F | F | F |
| 0.8749999999500 | 0.13043999673400 | 0.36110999932900 | F | F | F |
| 0.8749999999500 | 0.13043999673400 | 0.69444333266100 | F | F | F |
| 0.2083333332800 | 0.13043999673400 | 0.2499999994900  | F | F | F |
| 0.2083333332800 | 0.13043999673400 | 0.5833333328300  | F | F | F |
| 0.2083333332800 | 0.13043999673400 | 0.9166666661700  | F | F | F |
| 0.5416666666100 | 0.13043999673400 | 0.2499999994900  | F | F | F |
| 0.5416666666100 | 0.13043999673400 | 0.5833333328300  | F | F | F |
| 0.5416666666100 | 0.13043999673400 | 0.9166666661700  | F | F | F |
| 0.8749999999500 | 0.13043999673400 | 0.2499999994900  | F | F | F |
| 0.8749999999500 | 0.13043999673400 | 0.5833333328300  | F | F | F |
| 0.8749999999500 | 0.13043999673400 | 0.9166666661700  | F | F | F |
| 0.2083333332800 | 0.13043999673400 | 0.13888999819000 | F | F | F |
| 0.2083333332800 | 0.13043999673400 | 0.47222333152400 | F | F | F |
| 0.2083333332800 | 0.13043999673400 | 0.80555666485600 | F | F | F |
| 0.5416666666100 | 0.13043999673400 | 0.13888999819000 | F | F | F |
| 0.5416666666100 | 0.13043999673400 | 0.47222333152400 | F | F | F |
| 0.5416666666100 | 0.13043999673400 | 0.80555666485600 | F | F | F |
| 0.8749999999500 | 0.13043999673400 | 0.13888999819000 | F | F | F |
| 0.8749999999500 | 0.13043999673400 | 0.47222333152400 | F | F | F |
| 0.8749999999500 | 0.13043999673400 | 0.80555666485600 | F | F | F |
| 0.1250000000200 | 0.13043999673400 | 0.02777666599470 | F | F | F |
| 0.1250000000200 | 0.13043999673400 | 0.36110999932900 | F | F | F |
| 0.1250000000200 | 0.13043999673400 | 0.69444333266100 | F | F | F |
| 0.4583333333400 | 0.13043999673400 | 0.02777666599470 | F | F | F |
| 0.4583333333400 | 0.13043999673400 | 0.36110999932900 | F | F | F |
| 0.4583333333400 | 0.13043999673400 | 0.69444333266100 | F | F | F |
| 0.7916666666800 | 0.13043999673400 | 0.02777666599470 | F | F | F |
| 0.7916666666800 | 0.13043999673400 | 0.36110999932900 | F | F | F |
| 0.7916666666800 | 0.13043999673400 | 0.69444333266100 | F | F | F |

|                  |                  |                  |   |   |   |
|------------------|------------------|------------------|---|---|---|
| 0.12500000000200 | 0.13043999673400 | 0.24999999994900 | F | F | F |
| 0.12500000000200 | 0.13043999673400 | 0.58333333328300 | F | F | F |
| 0.12500000000200 | 0.13043999673400 | 0.91666666661700 | F | F | F |
| 0.45833333333400 | 0.13043999673400 | 0.24999999994900 | F | F | F |
| 0.45833333333400 | 0.13043999673400 | 0.58333333328300 | F | F | F |
| 0.45833333333400 | 0.13043999673400 | 0.91666666661700 | F | F | F |
| 0.79166666666800 | 0.13043999673400 | 0.24999999994900 | F | F | F |
| 0.79166666666800 | 0.13043999673400 | 0.58333333328300 | F | F | F |
| 0.79166666666800 | 0.13043999673400 | 0.91666666661700 | F | F | F |
| 0.12500000000200 | 0.13043999673400 | 0.13888999819000 | F | F | F |
| 0.12500000000200 | 0.13043999673400 | 0.47222333152400 | F | F | F |
| 0.12500000000200 | 0.13043999673400 | 0.80555666485600 | F | F | F |
| 0.45833333333400 | 0.13043999673400 | 0.13888999819000 | F | F | F |
| 0.45833333333400 | 0.13043999673400 | 0.47222333152400 | F | F | F |
| 0.45833333333400 | 0.13043999673400 | 0.80555666485600 | F | F | F |
| 0.79166666666800 | 0.13043999673400 | 0.13888999819000 | F | F | F |
| 0.79166666666800 | 0.13043999673400 | 0.47222333152400 | F | F | F |
| 0.79166666666800 | 0.13043999673400 | 0.80555666485600 | F | F | F |
| 0.29166666669900 | 0.13043999673400 | 0.02777666599470 | F | F | F |
| 0.29166666669900 | 0.13043999673400 | 0.36110999932900 | F | F | F |
| 0.29166666669900 | 0.13043999673400 | 0.69444333266100 | F | F | F |
| 0.62500000003100 | 0.13043999673400 | 0.02777666599470 | F | F | F |
| 0.62500000003100 | 0.13043999673400 | 0.36110999932900 | F | F | F |
| 0.62500000003100 | 0.13043999673400 | 0.69444333266100 | F | F | F |
| 0.95833333336500 | 0.13043999673400 | 0.02777666599470 | F | F | F |
| 0.95833333336500 | 0.13043999673400 | 0.36110999932900 | F | F | F |
| 0.95833333336500 | 0.13043999673400 | 0.69444333266100 | F | F | F |
| 0.29166666669900 | 0.13043999673400 | 0.24999999994900 | F | F | F |
| 0.29166666669900 | 0.13043999673400 | 0.58333333328300 | F | F | F |
| 0.29166666669900 | 0.13043999673400 | 0.91666666661700 | F | F | F |

|                  |                  |                  |   |   |   |
|------------------|------------------|------------------|---|---|---|
| 0.6250000003100  | 0.13043999673400 | 0.24999999994900 | F | F | F |
| 0.6250000003100  | 0.13043999673400 | 0.58333333328300 | F | F | F |
| 0.6250000003100  | 0.13043999673400 | 0.91666666661700 | F | F | F |
| 0.95833333336500 | 0.13043999673400 | 0.24999999994900 | F | F | F |
| 0.95833333336500 | 0.13043999673400 | 0.58333333328300 | F | F | F |
| 0.95833333336500 | 0.13043999673400 | 0.91666666661700 | F | F | F |
| 0.29166666669900 | 0.13043999673400 | 0.13888999819000 | F | F | F |
| 0.29166666669900 | 0.13043999673400 | 0.47222333152400 | F | F | F |
| 0.29166666669900 | 0.13043999673400 | 0.80555666485600 | F | F | F |
| 0.6250000003100  | 0.13043999673400 | 0.13888999819000 | F | F | F |
| 0.6250000003100  | 0.13043999673400 | 0.47222333152400 | F | F | F |
| 0.6250000003100  | 0.13043999673400 | 0.80555666485600 | F | F | F |
| 0.95833333336500 | 0.13043999673400 | 0.13888999819000 | F | F | F |
| 0.95833333336500 | 0.13043999673400 | 0.47222333152400 | F | F | F |
| 0.95833333336500 | 0.13043999673400 | 0.80555666485600 | F | F | F |
| 0.00065424468749 | 0.19404061070700 | 0.08246561850840 | T | T | T |
| 0.00054715558123 | 0.19405321466400 | 0.41578662020800 | T | T | T |
| 0.00057052330675 | 0.19404951482100 | 0.74913867255900 | T | T | T |
| 0.33373566324300 | 0.19431195494400 | 0.08259296747660 | T | T | T |
| 0.33389670664000 | 0.19405537579500 | 0.41581022562200 | T | T | T |
| 0.33387997812300 | 0.19405083205500 | 0.74913669751900 | T | T | T |
| 0.66724932506000 | 0.19406194512900 | 0.08243718647730 | T | T | T |
| 0.66724209998400 | 0.19405748289900 | 0.41578244012600 | T | T | T |
| 0.66723426266500 | 0.19405452607800 | 0.74912488951600 | T | T | T |
| 0.00009009111239 | 0.19434645099800 | 0.30513561405100 | T | T | T |
| 0.00026015932928 | 0.19442212067000 | 0.63836832494700 | T | T | T |
| 0.00030806764209 | 0.19440358338200 | 0.97170457856200 | T | T | T |
| 0.33302331541900 | 0.19448494671600 | 0.30467430921600 | T | T | T |
| 0.33359423731000 | 0.19441974029600 | 0.63836672599500 | T | T | T |
| 0.33352123314000 | 0.19441021159300 | 0.97170537884300 | T | T | T |



|                  |                  |                  |   |   |   |
|------------------|------------------|------------------|---|---|---|
| 0.66694030467300 | 0.19443160795000 | 0.30500963208600 | T | T | T |
| 0.66693160969600 | 0.19442526676700 | 0.63835816303300 | T | T | T |
| 0.66693875121400 | 0.19443268309800 | 0.97167988823600 | T | T | T |
| 0.33309804882600 | 0.19447882423400 | 0.19387879723400 | T | T | T |
| 0.33318503351800 | 0.19445854799800 | 0.52736316156100 | T | T | T |
| 0.33314138945200 | 0.19446982205400 | 0.86069618378200 | T | T | T |
| 0.66653244468700 | 0.19447800516900 | 0.19398997458000 | T | T | T |
| 0.66651715761100 | 0.19446999960300 | 0.52734558848400 | T | T | T |
| 0.66651924640700 | 0.19447088207700 | 0.86067791619800 | T | T | T |
| 0.99987809415300 | 0.19458721946300 | 0.19390804673000 | T | T | T |
| 0.99983440188900 | 0.19446544922100 | 0.52735253782900 | T | T | T |
| 0.99987321546000 | 0.19446192722300 | 0.86069905096600 | T | T | T |
| 0.16686022207000 | 0.19486845852100 | 0.08309190536110 | T | T | T |
| 0.16670063403600 | 0.19736356773700 | 0.41872526609800 | T | T | T |
| 0.16677625929100 | 0.19737413355100 | 0.75218619557400 | T | T | T |
| 0.50008405863400 | 0.19738475289600 | 0.08547963279360 | T | T | T |
| 0.50014602687300 | 0.19738833063700 | 0.41885537222600 | T | T | T |
| 0.50011114342200 | 0.19738161766400 | 0.75217818269400 | T | T | T |
| 0.83350032645400 | 0.19739278004800 | 0.08550805361180 | T | T | T |
| 0.83344346764400 | 0.19738015264300 | 0.41883117492000 | T | T | T |
| 0.83346070307400 | 0.19738339917700 | 0.75218413167700 | T | T | T |
| 0.16673662270900 | 0.19438998615800 | 0.30461771555100 | T | T | T |
| 0.16640732999200 | 0.19517041561500 | 0.63888241126100 | T | T | T |
| 0.16637699889500 | 0.19482252208200 | 0.97196945959800 | T | T | T |
| 0.49977260413100 | 0.19518487653000 | 0.30552808189800 | T | T | T |
| 0.49974920874400 | 0.19517770199300 | 0.63887578123100 | T | T | T |
| 0.49973236359000 | 0.19519067777700 | 0.97219606460800 | T | T | T |
| 0.83308535889000 | 0.19518811728000 | 0.30551343633200 | T | T | T |
| 0.83308482136700 | 0.19517852770300 | 0.63887539561900 | T | T | T |
| 0.83311721321700 | 0.19518477787100 | 0.97220592785000 | T | T | T |

|                  |                  |                  |   |   |   |
|------------------|------------------|------------------|---|---|---|
| 0.16658703378900 | 0.19485951567200 | 0.19434286276900 | T | T | T |
| 0.16609574704500 | 0.19334271799200 | 0.52640671042300 | T | T | T |
| 0.16608698957900 | 0.19332609239000 | 0.85975136056200 | T | T | T |
| 0.49944933938300 | 0.19339072844600 | 0.19301215751200 | T | T | T |
| 0.49944202193600 | 0.19334830929500 | 0.52639659605900 | T | T | T |
| 0.49942086162300 | 0.19336041117800 | 0.85972113670700 | T | T | T |
| 0.83279078410800 | 0.19338651836400 | 0.19301346088900 | T | T | T |
| 0.83276121052300 | 0.19335594497100 | 0.52639219586100 | T | T | T |
| 0.83278874337300 | 0.19335404597500 | 0.85972887300900 | T | T | T |
| 0.08384311632110 | 0.19520647148900 | 0.08347533644610 | T | T | T |
| 0.08390721491520 | 0.19584795986400 | 0.41724038107500 | T | T | T |
| 0.08372872089560 | 0.19579249511100 | 0.75075311250300 | T | T | T |
| 0.41696567311700 | 0.19580494565500 | 0.08402949164060 | T | T | T |
| 0.41705826091900 | 0.19579224326800 | 0.41740532344300 | T | T | T |
| 0.41703928339600 | 0.19578769101400 | 0.75074222199600 | T | T | T |
| 0.75040113788500 | 0.19578902585400 | 0.08404166864130 | T | T | T |
| 0.75037939583900 | 0.19579465893200 | 0.41739257773200 | T | T | T |
| 0.75039134492200 | 0.19579095432800 | 0.75073587556600 | T | T | T |
| 0.08348938666480 | 0.19432491211500 | 0.30479811622500 | T | T | T |
| 0.08309679989360 | 0.19439550860400 | 0.63818204288600 | T | T | T |
| 0.08316681831200 | 0.19429260275600 | 0.97148775694600 | T | T | T |
| 0.41648239934700 | 0.19437880269100 | 0.30489625551300 | T | T | T |
| 0.41643118307700 | 0.19439656275000 | 0.63818190550300 | T | T | T |
| 0.41639120183000 | 0.19440149674900 | 0.97150490521200 | T | T | T |
| 0.74977582745400 | 0.19440398283800 | 0.30483179340000 | T | T | T |
| 0.74977106181400 | 0.19439977860700 | 0.63817843664800 | T | T | T |
| 0.74978723331000 | 0.19440194402800 | 0.97150507997700 | T | T | T |
| 0.08338232044930 | 0.19474601600100 | 0.19372870385300 | T | T | T |
| 0.08365145159570 | 0.19383580263600 | 0.52653543653900 | T | T | T |
| 0.08367309629650 | 0.19383203734600 | 0.85987024903700 | T | T | T |

|                  |                  |                  |   |   |   |
|------------------|------------------|------------------|---|---|---|
| 0.41701307293300 | 0.19389146443700 | 0.19310561916300 | T | T | T |
| 0.41700537967400 | 0.19384195627200 | 0.52652936129000 | T | T | T |
| 0.41697058719000 | 0.19385054628700 | 0.85985676225800 | T | T | T |
| 0.75034760657100 | 0.19386228860800 | 0.19315903724400 | T | T | T |
| 0.75033040624100 | 0.19385133754500 | 0.52651439602100 | T | T | T |
| 0.75034377815500 | 0.19384878297900 | 0.85985201357200 | T | T | T |
| 0.25010056769600 | 0.19403794791400 | 0.08237657882410 | T | T | T |
| 0.24987364852600 | 0.19308995558400 | 0.41484333503000 | T | T | T |
| 0.24989122332300 | 0.19304205698200 | 0.74822105606800 | T | T | T |
| 0.58323953745400 | 0.19306595027600 | 0.08152504510440 | T | T | T |
| 0.58325119315400 | 0.19305684827900 | 0.41487191818300 | T | T | T |
| 0.58323634440900 | 0.19305116254200 | 0.74821060303300 | T | T | T |
| 0.91664875012400 | 0.19307645024200 | 0.08154875605980 | T | T | T |
| 0.91654932245100 | 0.19305654770400 | 0.41486868721200 | T | T | T |
| 0.91658079226300 | 0.19304648035500 | 0.74821936794800 | T | T | T |
| 0.24986842602400 | 0.19437583319800 | 0.30455155901500 | T | T | T |
| 0.24996084093800 | 0.19453550901800 | 0.63830084654000 | T | T | T |
| 0.24985004292200 | 0.19446580903800 | 0.97162718256500 | T | T | T |
| 0.58331548233800 | 0.19455068011200 | 0.30493973502700 | T | T | T |
| 0.58329834804700 | 0.19454254478800 | 0.63829011389200 | T | T | T |
| 0.58329577686900 | 0.19455010523900 | 0.97160838856900 | T | T | T |
| 0.91662070057900 | 0.19455504923700 | 0.30491523890000 | T | T | T |
| 0.91662950728300 | 0.19454061498300 | 0.63829587005800 | T | T | T |
| 0.91668044198200 | 0.19454345723700 | 0.97162486857600 | T | T | T |
| 0.24979782947900 | 0.19416322960400 | 0.19379862211000 | T | T | T |
| 0.24996306725500 | 0.19473552592000 | 0.52708099240400 | T | T | T |
| 0.24993335294900 | 0.19474392265800 | 0.86041514208400 | T | T | T |
| 0.58332099455600 | 0.19475488127300 | 0.19370134579100 | T | T | T |
| 0.58330520684500 | 0.19474675921200 | 0.52706254942500 | T | T | T |
| 0.58329627599900 | 0.19474693454300 | 0.86039209666000 | T | T | T |

|                  |                  |                  |   |   |   |
|------------------|------------------|------------------|---|---|---|
| 0.91666551331700 | 0.19479131491300 | 0.19367098161800 | T | T | T |
| 0.91662255938800 | 0.19474301158300 | 0.52706732742900 | T | T | T |
| 0.91665547360900 | 0.19474132566500 | 0.86040601832800 | T | T | T |
| 0.12466927243400 | 0.26533618690100 | 0.03106324569130 | T | T | T |
| 0.12490612881600 | 0.26485010507700 | 0.36436114168900 | T | T | T |
| 0.12443637141100 | 0.26493939488300 | 0.69842357501400 | T | T | T |
| 0.45774119488600 | 0.26498940875400 | 0.03170404292120 | T | T | T |
| 0.45779747157800 | 0.26494397440900 | 0.36508281109200 | T | T | T |
| 0.45776890387600 | 0.26494725950200 | 0.69841400883000 | T | T | T |
| 0.79113205241300 | 0.26496933153900 | 0.03172492533240 | T | T | T |
| 0.79110343103500 | 0.26494098868100 | 0.36504044114700 | T | T | T |
| 0.79110996995200 | 0.26494625489300 | 0.69840932327000 | T | T | T |
| 0.12483221711700 | 0.26460631480500 | 0.25260089721600 | T | T | T |
| 0.12373791700800 | 0.26218766425700 | 0.58490974495700 | T | T | T |
| 0.12374320704500 | 0.26223829059800 | 0.91823505726200 | T | T | T |
| 0.45715604937300 | 0.26210105279200 | 0.25151078088300 | T | T | T |
| 0.45709052365300 | 0.26217646501800 | 0.58490333694300 | T | T | T |
| 0.45705756851300 | 0.26218268478300 | 0.91822215337800 | T | T | T |
| 0.79043909730600 | 0.26213776334500 | 0.25151897458100 | T | T | T |
| 0.79041366569700 | 0.26216882640900 | 0.58489251269200 | T | T | T |
| 0.79043735498200 | 0.26216837695800 | 0.91822713798600 | T | T | T |
| 0.12575922646300 | 0.26626488813600 | 0.14211380087700 | T | T | T |
| 0.12590919286500 | 0.26723557125400 | 0.47483662151300 | T | T | T |
| 0.12596975727000 | 0.26722550793100 | 0.80816355654100 | T | T | T |
| 0.45917325151300 | 0.26716038037100 | 0.14128187119600 | T | T | T |
| 0.45934840618600 | 0.26719059937000 | 0.47475425990900 | T | T | T |
| 0.45929318247000 | 0.26721413744300 | 0.80808722319400 | T | T | T |
| 0.79270849196200 | 0.26715107432300 | 0.14130902784100 | T | T | T |
| 0.79266178106400 | 0.26718149027700 | 0.47472093059800 | T | T | T |
| 0.79266445463800 | 0.26719630527300 | 0.80808144608100 | T | T | T |

|                  |                  |                  |   |   |   |
|------------------|------------------|------------------|---|---|---|
| 0.29191207455900 | 0.26509635383200 | 0.03049718347450 | T | T | T |
| 0.29186097282500 | 0.26479520227500 | 0.36387193537800 | T | T | T |
| 0.29194470084400 | 0.26491363529800 | 0.69727228934100 | T | T | T |
| 0.62528893728000 | 0.26493046369400 | 0.03055210711300 | T | T | T |
| 0.62530034542800 | 0.26491021713200 | 0.36388925201800 | T | T | T |
| 0.62528522510200 | 0.26492014995100 | 0.69725073475500 | T | T | T |
| 0.95866623653900 | 0.26494642098600 | 0.03060815585200 | T | T | T |
| 0.95859016388400 | 0.26490791347000 | 0.36388845522800 | T | T | T |
| 0.95861558660800 | 0.26491532468900 | 0.69727028190500 | T | T | T |
| 0.29104611691300 | 0.26617311215700 | 0.25235174168800 | T | T | T |
| 0.29109840429400 | 0.26550162078800 | 0.58689517116300 | T | T | T |
| 0.29103404281200 | 0.26548258462400 | 0.92025843619000 | T | T | T |
| 0.62445804647300 | 0.26549332342300 | 0.25349244370000 | T | T | T |
| 0.62443382508400 | 0.26550047867500 | 0.58686755640800 | T | T | T |
| 0.62442960571500 | 0.26551534366000 | 0.92018507781200 | T | T | T |
| 0.95791068881600 | 0.26542295048100 | 0.25337998654600 | T | T | T |
| 0.95774810483400 | 0.26549669565800 | 0.58688068683600 | T | T | T |
| 0.95779692216400 | 0.26550583007800 | 0.92022376759200 | T | T | T |
| 0.29147991535700 | 0.26482654040300 | 0.14132838187100 | T | T | T |
| 0.29316803661200 | 0.26543911881800 | 0.47487839551800 | T | T | T |
| 0.29313446706700 | 0.26544619301600 | 0.80820235400000 | T | T | T |
| 0.62651362403000 | 0.26545760331000 | 0.14145959871000 | T | T | T |
| 0.62650359142100 | 0.26544796384400 | 0.47482950363100 | T | T | T |
| 0.62649485512900 | 0.26545729630400 | 0.80816952093400 | T | T | T |
| 0.96014171696600 | 0.26552513922800 | 0.14142862254000 | T | T | T |
| 0.95979536802400 | 0.26543966954400 | 0.47484357064100 | T | T | T |
| 0.95983562153000 | 0.26544398001400 | 0.80819891145400 | T | T | T |
| 0.04202541331860 | 0.26529618527500 | 0.03089581077210 | T | T | T |
| 0.04200148618550 | 0.26522730599400 | 0.36421230171200 | T | T | T |
| 0.04195797948150 | 0.26527143674500 | 0.69762460380800 | T | T | T |

|                  |                  |                  |   |   |   |
|------------------|------------------|------------------|---|---|---|
| 0.37524591462800 | 0.26534582500900 | 0.03088484646470 | T | T | T |
| 0.37520065797300 | 0.26513896318800 | 0.36416010746200 | T | T | T |
| 0.37528954789700 | 0.26527796511600 | 0.69761925017700 | T | T | T |
| 0.70864221704900 | 0.26529435932200 | 0.03090377587720 | T | T | T |
| 0.70863430976900 | 0.26527636494700 | 0.36423276560700 | T | T | T |
| 0.70862988051500 | 0.26528186301400 | 0.69760096934700 | T | T | T |
| 0.04110810706950 | 0.26504844156600 | 0.25311669109200 | T | T | T |
| 0.04079470459140 | 0.26565321044900 | 0.58626140746400 | T | T | T |
| 0.04084389872510 | 0.26561645001700 | 0.91964232125900 | T | T | T |
| 0.37427946534700 | 0.26541414008000 | 0.25288536872300 | T | T | T |
| 0.37414893693400 | 0.26565392454700 | 0.58626261470800 | T | T | T |
| 0.37410555223800 | 0.26565850912400 | 0.91959275562000 | T | T | T |
| 0.70749807450000 | 0.26563794916800 | 0.25287413177600 | T | T | T |
| 0.70747951623500 | 0.26564658495700 | 0.58624009136200 | T | T | T |
| 0.70748759475500 | 0.26565968857100 | 0.91956656061600 | T | T | T |
| 0.04181239370530 | 0.26595537973700 | 0.14221560948000 | T | T | T |
| 0.04104630838960 | 0.26599723781100 | 0.47584794363800 | T | T | T |
| 0.04105750418790 | 0.26601001524100 | 0.80922561646600 | T | T | T |
| 0.37413641137000 | 0.26614835198000 | 0.14253370571900 | T | T | T |
| 0.37440519973100 | 0.26601573805500 | 0.47589316581600 | T | T | T |
| 0.37437060035700 | 0.26602056235600 | 0.80920824686400 | T | T | T |
| 0.70774918000200 | 0.26601648760900 | 0.14247556202000 | T | T | T |
| 0.70772748766600 | 0.26601214797500 | 0.47584409662100 | T | T | T |
| 0.70772783894500 | 0.26602315256800 | 0.80918832911100 | T | T | T |
| 0.20828367525800 | 0.26527194352800 | 0.03080016355960 | T | T | T |
| 0.20804216091200 | 0.26490909919400 | 0.36377550535400 | T | T | T |
| 0.20832784386800 | 0.26532923922500 | 0.69775558020500 | T | T | T |
| 0.54165830781000 | 0.26536888418000 | 0.03103380749870 | T | T | T |
| 0.54168773026600 | 0.26533919438000 | 0.36438049654500 | T | T | T |
| 0.54166666677800 | 0.26534481297700 | 0.69773638283200 | T | T | T |

|                  |                  |                  |   |   |   |
|------------------|------------------|------------------|---|---|---|
| 0.87504393458200 | 0.26538290559200 | 0.03106160906360 | T | T | T |
| 0.87498947722200 | 0.26532776026800 | 0.36435552807500 | T | T | T |
| 0.87500317274000 | 0.26533913833400 | 0.69774353799300 | T | T | T |
| 0.20827293716900 | 0.26442100908800 | 0.25215440725600 | T | T | T |
| 0.20713483350100 | 0.26425417197500 | 0.58495078509900 | T | T | T |
| 0.20708732593000 | 0.26422271613500 | 0.91831062573500 | T | T | T |
| 0.54052934586800 | 0.26424939195500 | 0.25153599299900 | T | T | T |
| 0.54048214808100 | 0.26425725444500 | 0.58492094301100 | T | T | T |
| 0.54046581674600 | 0.26426642040100 | 0.91824081960200 | T | T | T |
| 0.87385498339500 | 0.26423470220800 | 0.25151271209800 | T | T | T |
| 0.87380004432900 | 0.26425580981400 | 0.58492794561400 | T | T | T |
| 0.87384325233300 | 0.26426719876000 | 0.91825883263200 | T | T | T |
| 0.20913143936400 | 0.26529707090700 | 0.14147971012400 | T | T | T |
| 0.20882293766000 | 0.25721006973400 | 0.46806134625900 | T | T | T |
| 0.20878968941800 | 0.25721466939100 | 0.80139587872000 | T | T | T |
| 0.54215721167000 | 0.25721819447100 | 0.13466682389200 | T | T | T |
| 0.54215059937700 | 0.25721209791400 | 0.46803252149600 | T | T | T |
| 0.54214239605600 | 0.25721717918800 | 0.80136419687000 | T | T | T |
| 0.87567999486200 | 0.25724101247300 | 0.13467318654200 | T | T | T |
| 0.87545024726400 | 0.25720645410000 | 0.46803072203500 | T | T | T |
| 0.87548823714700 | 0.25722509666500 | 0.80137250012000 | T | T | T |
| 0.19647350421800 | 0.38413727948000 | 0.22471889795100 | T | T | T |
| 0.19009971099700 | 0.37787625174900 | 0.56255550170600 | T | T | T |
| 0.19012371048200 | 0.37786743489300 | 0.89591790195900 | T | T | T |
| 0.52340088195000 | 0.37792505160500 | 0.22925898851800 | T | T | T |
| 0.52341343837200 | 0.37787218793500 | 0.56255649617100 | T | T | T |
| 0.52344238509000 | 0.37789255947100 | 0.89591438014200 | T | T | T |
| 0.85677678941900 | 0.37790880910200 | 0.22928139592600 | T | T | T |
| 0.85676485164000 | 0.37788728728300 | 0.56257925985900 | T | T | T |
| 0.85674155281700 | 0.37789416942600 | 0.89588708414100 | T | T | T |

|                  |                  |                  |   |   |   |
|------------------|------------------|------------------|---|---|---|
| 0.23987487480300 | 0.36325059749200 | 0.21203433124800 | T | T | T |
| 0.22383241957900 | 0.33918804655300 | 0.57520675647000 | T | T | T |
| 0.22389921916600 | 0.33925978318100 | 0.90858858307900 | T | T | T |
| 0.55713974344900 | 0.33917065777000 | 0.24187343154400 | T | T | T |
| 0.55715048572100 | 0.33916783854200 | 0.57519967416400 | T | T | T |
| 0.55715080438300 | 0.33918042509600 | 0.90852503610700 | T | T | T |
| 0.89049138240000 | 0.33919320888300 | 0.24189190588000 | T | T | T |
| 0.89049474971700 | 0.33917154955100 | 0.57519617681600 | T | T | T |
| 0.89048378441400 | 0.33919841003200 | 0.90855345206200 | T | T | T |
| 0.17170415522800 | 0.36917024999500 | 0.24539842111000 | T | T | T |
| 0.16249602068700 | 0.36261878956700 | 0.58202023620600 | T | T | T |
| 0.16249937152200 | 0.36271185124800 | 0.91533743736200 | T | T | T |
| 0.49579198238100 | 0.36254487738000 | 0.24883234773100 | T | T | T |
| 0.49581283851900 | 0.36257029676800 | 0.58206855139100 | T | T | T |
| 0.49582703419800 | 0.36259274294500 | 0.91541210100400 | T | T | T |
| 0.82914674817800 | 0.36257004997100 | 0.24880899987200 | T | T | T |
| 0.82915496972000 | 0.36258274224000 | 0.58207702326100 | T | T | T |
| 0.82914230465600 | 0.36257209342400 | 0.91541262943900 | T | T | T |
| 0.17126432212900 | 0.34045831843300 | 0.21186867682100 | T | T | T |
| 0.16278563558600 | 0.35307623267200 | 0.54813414310900 | T | T | T |
| 0.16279219023600 | 0.35306540138300 | 0.88148870876000 | T | T | T |
| 0.49606894091200 | 0.35328857117400 | 0.21485172252400 | T | T | T |
| 0.49608682920500 | 0.35313709927500 | 0.54814028012000 | T | T | T |
| 0.49611463539400 | 0.35316872250800 | 0.88149088080600 | T | T | T |
| 0.82942061213900 | 0.35329376655900 | 0.21485074536900 | T | T | T |
| 0.82944429309500 | 0.35314944031400 | 0.54815594848000 | T | T | T |
| 0.82942377253900 | 0.35315235363800 | 0.88147650113800 | T | T | T |
| 0.18289903144300 | 0.32383842253000 | 0.27459076335400 | T | T | T |
| 0.17598202557000 | 0.32302687907000 | 0.60778209713700 | T | T | T |
| 0.17602941225200 | 0.32297973400800 | 0.94104214681400 | T | T | T |



|                  |                  |                  |   |   |   |
|------------------|------------------|------------------|---|---|---|
| 0.50925631541800 | 0.32313787201600 | 0.27452061624700 | T | T | T |
| 0.50930049776300 | 0.32307655503400 | 0.60780515911600 | T | T | T |
| 0.50929124097900 | 0.32307095944800 | 0.94115987483500 | T | T | T |
| 0.84260322413500 | 0.32314944358300 | 0.27455265058100 | T | T | T |
| 0.84263567166800 | 0.32304124126200 | 0.60778887467600 | T | T | T |
| 0.84261464830200 | 0.32311919676100 | 0.94117375760200 | T | T | T |
| 0.14990398942700 | 0.32873641980800 | 0.27428206225900 | T | T | T |
| 0.14290867566600 | 0.32021824914100 | 0.60321332163000 | T | T | T |
| 0.14294355966400 | 0.32025550729700 | 0.93660805048200 | T | T | T |
| 0.47620303570600 | 0.32009714826300 | 0.26973917113200 | T | T | T |
| 0.47623263147700 | 0.32016503167100 | 0.60316031362500 | T | T | T |
| 0.47621902372500 | 0.32023350834700 | 0.93652580893300 | T | T | T |
| 0.80954713198800 | 0.32014579961100 | 0.26979215045000 | T | T | T |
| 0.80956294026100 | 0.32018931975200 | 0.60317306730600 | T | T | T |
| 0.80955264329700 | 0.32016999546900 | 0.93647895135300 | T | T | T |
| 0.24303112186400 | 0.39237885188000 | 0.23779465808600 | T | T | T |
| 0.23274438732300 | 0.38803139846600 | 0.58164939731500 | T | T | T |
| 0.23277028335400 | 0.38816223037600 | 0.91491581174700 | T | T | T |
| 0.56603644846900 | 0.38798371139800 | 0.24839290787100 | T | T | T |
| 0.56605533912600 | 0.38799231056600 | 0.58168711166400 | T | T | T |
| 0.56605090663300 | 0.38800556630300 | 0.91502303077600 | T | T | T |
| 0.89944223569300 | 0.38803852803400 | 0.24829097144900 | T | T | T |
| 0.89942244477700 | 0.38799960002500 | 0.58165599212400 | T | T | T |
| 0.89936547289300 | 0.38803581868400 | 0.91503508910600 | T | T | T |
| 0.15432026900000 | 0.30901740422000 | 0.18706563565300 | T | T | T |
| 0.14566974939700 | 0.30004190484700 | 0.51646340279500 | T | T | T |
| 0.14569129241500 | 0.30000232599200 | 0.84978810524200 | T | T | T |
| 0.47891964217700 | 0.30014015048100 | 0.18313123930900 | T | T | T |
| 0.47897831328200 | 0.30000571671200 | 0.51640743487400 | T | T | T |
| 0.47898070753200 | 0.30005267837300 | 0.84977222016400 | T | T | T |

|                  |                  |                  |   |   |   |
|------------------|------------------|------------------|---|---|---|
| 0.81224819536900 | 0.30007328390700 | 0.18306950891100 | T | T | T |
| 0.81233215353000 | 0.30005380554600 | 0.51644457089400 | T | T | T |
| 0.81232421890500 | 0.30001719625600 | 0.84975522424200 | T | T | T |
| 0.26415575591800 | 0.30399670805900 | 0.18223779408500 | T | T | T |
| 0.17986391495900 | 0.30776825376500 | 0.52075966858000 | T | T | T |
| 0.17988041864800 | 0.30775039980900 | 0.85411252812400 | T | T | T |
| 0.51306525192800 | 0.30782199872400 | 0.18738609576700 | T | T | T |
| 0.51312764416800 | 0.30776304988100 | 0.52074945748100 | T | T | T |
| 0.51314244518000 | 0.30777667536100 | 0.85408521563600 | T | T | T |
| 0.84635848256900 | 0.30782576054100 | 0.18737555034400 | T | T | T |
| 0.84649528466400 | 0.30777471432500 | 0.52075693579900 | T | T | T |
| 0.84648062312800 | 0.30777058616500 | 0.85408293411400 | T | T | T |
| 0.19643236924700 | 0.88099466746500 | 0.22618716369600 | T | T | T |
| 0.19024526800200 | 0.88584776068300 | 0.56382843368600 | T | T | T |
| 0.19027539032600 | 0.88585103749700 | 0.89718166496200 | T | T | T |
| 0.52354714538300 | 0.88581044237800 | 0.23054409142800 | T | T | T |
| 0.52355940604900 | 0.88585401314200 | 0.56383724451900 | T | T | T |
| 0.52358652282900 | 0.88583210115700 | 0.89719718869700 | T | T | T |
| 0.85691962762900 | 0.88582086231200 | 0.23056688311000 | T | T | T |
| 0.85690894357200 | 0.88583852493400 | 0.56385934387700 | T | T | T |
| 0.85688793104000 | 0.88583667643000 | 0.89716910623200 | T | T | T |
| 0.23921497501700 | 0.90292522839900 | 0.21194149209500 | T | T | T |
| 0.22338281672500 | 0.92459455680700 | 0.57649920834700 | T | T | T |
| 0.22344130406600 | 0.92453300622200 | 0.90987959190400 | T | T | T |
| 0.55670557364500 | 0.92460221540700 | 0.24315734530400 | T | T | T |
| 0.55670641526000 | 0.92461122735700 | 0.57648874385400 | T | T | T |
| 0.55670722558000 | 0.92459565233000 | 0.90981405631700 | T | T | T |
| 0.89004707749700 | 0.92458684292100 | 0.24317970667200 | T | T | T |
| 0.89004778946100 | 0.92460843132600 | 0.57648692916700 | T | T | T |
| 0.89004161316000 | 0.92457957596500 | 0.90984133145100 | T | T | T |

|                  |                  |                  |   |   |   |
|------------------|------------------|------------------|---|---|---|
| 0.17151479942000 | 0.89504016927800 | 0.24690092165000 | T | T | T |
| 0.16297441379500 | 0.90141984946600 | 0.58367391330400 | T | T | T |
| 0.16297796205700 | 0.90131186757900 | 0.91696478692900 | T | T | T |
| 0.49627586997500 | 0.90149518547500 | 0.25051171143900 | T | T | T |
| 0.49629365414600 | 0.90146866221700 | 0.58373577301400 | T | T | T |
| 0.49630654366100 | 0.90144880491100 | 0.91708073146800 | T | T | T |
| 0.82962538082100 | 0.90147230304500 | 0.25048256850100 | T | T | T |
| 0.82963435310500 | 0.90145795026000 | 0.58374291948800 | T | T | T |
| 0.82962371028000 | 0.90146714508200 | 0.91708297991200 | T | T | T |
| 0.17039370786600 | 0.92262185998100 | 0.21264829181700 | T | T | T |
| 0.16250164635800 | 0.90968338324600 | 0.54939401605300 | T | T | T |
| 0.16251052123000 | 0.90968386506800 | 0.88273506496800 | T | T | T |
| 0.49579070171300 | 0.90950306683900 | 0.21613212973900 | T | T | T |
| 0.49580546173500 | 0.90962908956800 | 0.54941042802100 | T | T | T |
| 0.49583359604400 | 0.90960324742500 | 0.88276268624800 | T | T | T |
| 0.82913904575700 | 0.90949081747400 | 0.21612806695100 | T | T | T |
| 0.82916290469300 | 0.90962134811100 | 0.54942491673200 | T | T | T |
| 0.82914114627300 | 0.90961882308900 | 0.88274895352700 | T | T | T |
| 0.18304842966100 | 0.94032129050100 | 0.27579790235300 | T | T | T |
| 0.17697556286400 | 0.94170369528200 | 0.60825197369900 | T | T | T |
| 0.17702099102000 | 0.94175096995700 | 0.94148226466800 | T | T | T |
| 0.51024926603600 | 0.94160748295000 | 0.27501965973100 | T | T | T |
| 0.51029418248200 | 0.94166278600000 | 0.60828663507800 | T | T | T |
| 0.51028678793700 | 0.94166995969900 | 0.94164177041400 | T | T | T |
| 0.84359623192900 | 0.94160330525200 | 0.27503874238200 | T | T | T |
| 0.84362923118000 | 0.94169474253600 | 0.60827037070800 | T | T | T |
| 0.84360775841100 | 0.94162694716200 | 0.94165821958900 | T | T | T |
| 0.15003219456600 | 0.93572857369300 | 0.27562391021800 | T | T | T |
| 0.14362732111900 | 0.94287910461800 | 0.60486702638900 | T | T | T |
| 0.14366559329300 | 0.94286855980400 | 0.93822031682800 | T | T | T |

|                  |                  |                  |   |   |   |
|------------------|------------------|------------------|---|---|---|
| 0.47691109796900 | 0.94298293181000 | 0.27142977852300 | T | T | T |
| 0.47694750328000 | 0.94292545592700 | 0.60482946265900 | T | T | T |
| 0.47693696472100 | 0.94285696806000 | 0.93820351483700 | T | T | T |
| 0.81025538790000 | 0.94293879855700 | 0.27147932685900 | T | T | T |
| 0.81027948921100 | 0.94290256227000 | 0.60484316960000 | T | T | T |
| 0.81026460817100 | 0.94291334566700 | 0.93815793188100 | T | T | T |
| 0.24269871625700 | 0.87824267671600 | 0.23925033964800 | T | T | T |
| 0.23248835465500 | 0.87591021574200 | 0.58331234844200 | T | T | T |
| 0.23251730536500 | 0.87578696340400 | 0.91657169043200 | T | T | T |
| 0.56578638077200 | 0.87595064082000 | 0.25005585341700 | T | T | T |
| 0.56580246193900 | 0.87594725504300 | 0.58334976045200 | T | T | T |
| 0.56579885818700 | 0.87593181946700 | 0.91668715307200 | T | T | T |
| 0.89919307418100 | 0.87590311372700 | 0.24995955924000 | T | T | T |
| 0.89916884704900 | 0.87594086472700 | 0.58332031776500 | T | T | T |
| 0.89911077353400 | 0.87590175798100 | 0.91669746193700 | T | T | T |
| 0.15316349299500 | 0.95284844419700 | 0.18745498028900 | T | T | T |
| 0.14488562819700 | 0.96269325288000 | 0.51641490608800 | T | T | T |
| 0.14490175892400 | 0.96272721781500 | 0.84974237472600 | T | T | T |
| 0.47817747637400 | 0.96259159464200 | 0.18305749824900 | T | T | T |
| 0.47821463762500 | 0.96272997853500 | 0.51634491010800 | T | T | T |
| 0.47821545665100 | 0.96268634449700 | 0.84971506933300 | T | T | T |
| 0.81149188380600 | 0.96267386848900 | 0.18299713078600 | T | T | T |
| 0.81156980454200 | 0.96268655218400 | 0.51638443740100 | T | T | T |
| 0.81155973945200 | 0.96271202184000 | 0.84968921922500 | T | T | T |
| 0.26434548587100 | 0.95924023218400 | 0.18193997766000 | T | T | T |
| 0.17915954045200 | 0.95515764334100 | 0.52105055764700 | T | T | T |
| 0.17916929227300 | 0.95517262152100 | 0.85440915154900 | T | T | T |
| 0.51239867775200 | 0.95509475344000 | 0.18766463399800 | T | T | T |
| 0.51243926554900 | 0.95515636821200 | 0.52103874168200 | T | T | T |
| 0.51245415290200 | 0.95514174554900 | 0.85437154094300 | T | T | T |

|                  |                  |                  |   |   |   |
|------------------|------------------|------------------|---|---|---|
| 0.84567580563000 | 0.95509548535000 | 0.18766600197500 | T | T | T |
| 0.84580931616900 | 0.95514537200400 | 0.52104209493700 | T | T | T |
| 0.84579199602600 | 0.95514760157500 | 0.85436994823100 | T | T | T |
| 0.23088229858600 | 0.30139874796400 | 0.18287098506700 | T | T | T |
| 0.23740048147100 | 0.36120677639500 | 0.48525451672700 | T | T | T |
| 0.23741702611400 | 0.36117372235800 | 0.81862376896000 | T | T | T |
| 0.57082467359400 | 0.36117883073900 | 0.15191478966500 | T | T | T |
| 0.57077820697100 | 0.36117899587800 | 0.48526956172000 | T | T | T |
| 0.57078972672900 | 0.36117135496900 | 0.81860706667400 | T | T | T |
| 0.90422134217600 | 0.36127519211100 | 0.15195071098400 | T | T | T |
| 0.90413309220800 | 0.36114662844200 | 0.48526014836500 | T | T | T |
| 0.90410736496700 | 0.36119726576000 | 0.81859802623200 | T | T | T |
| 0.23104412914300 | 0.96238400196000 | 0.18220636038400 | T | T | T |
| 0.23725473130300 | 0.90236797229800 | 0.48667527772400 | T | T | T |
| 0.23727389287200 | 0.90239609514900 | 0.82004867804700 | T | T | T |
| 0.57067929924000 | 0.90237634574500 | 0.15323959730300 | T | T | T |
| 0.57063171717700 | 0.90238816279200 | 0.48664270201700 | T | T | T |
| 0.57064540431300 | 0.90239312656800 | 0.81998328219200 | T | T | T |
| 0.90404759480600 | 0.90227661899900 | 0.15332093177200 | T | T | T |
| 0.90399420378500 | 0.90241741322800 | 0.48662689226800 | T | T | T |
| 0.90396251968100 | 0.90236960855200 | 0.81997279462000 | T | T | T |
| 0.23228790373800 | 0.38984366244300 | 0.22099828784800 | T | T | T |
| 0.22283179145700 | 0.36991092773200 | 0.56831233711100 | T | T | T |
| 0.22281676742700 | 0.36994040605900 | 0.90165621352200 | T | T | T |
| 0.55620414364500 | 0.36990603470200 | 0.23498069166300 | T | T | T |
| 0.55617844993300 | 0.36990076317800 | 0.56831133275100 | T | T | T |
| 0.55617785979300 | 0.36991714010200 | 0.90164232616300 | T | T | T |
| 0.88951239453600 | 0.36990577198500 | 0.23496912791100 | T | T | T |
| 0.88950570961700 | 0.36990267411700 | 0.56830915969100 | T | T | T |
| 0.88952027183200 | 0.36992127901500 | 0.90165017785200 | T | T | T |

|                  |                  |                  |   |   |   |
|------------------|------------------|------------------|---|---|---|
| 0.17553736773800 | 0.37688788507000 | 0.22584886388700 | T | T | T |
| 0.16806260673200 | 0.37664293417600 | 0.56186680606300 | T | T | T |
| 0.16807507292100 | 0.37664290431600 | 0.89521308580800 | T | T | T |
| 0.50138046394900 | 0.37674113642700 | 0.22860163621800 | T | T | T |
| 0.50138354053400 | 0.37665878939700 | 0.56188009478800 | T | T | T |
| 0.50140468451600 | 0.37668579064500 | 0.89522870595200 | T | T | T |
| 0.83473849680300 | 0.37673382832800 | 0.22860449132100 | T | T | T |
| 0.83472951457900 | 0.37667633292200 | 0.56189409404800 | T | T | T |
| 0.83471543621100 | 0.37667221101600 | 0.89521489225700 | T | T | T |
| 0.16758809160100 | 0.34638467653200 | 0.27574261155700 | T | T | T |
| 0.15894872981700 | 0.34238181917400 | 0.60620528636000 | T | T | T |
| 0.15899550418400 | 0.34237094855900 | 0.93960257136900 | T | T | T |
| 0.49219704182400 | 0.34238233468500 | 0.27279161493300 | T | T | T |
| 0.49225378497000 | 0.34238467160100 | 0.60616771283600 | T | T | T |
| 0.49225693163400 | 0.34240208722500 | 0.93950845748800 | T | T | T |
| 0.82554492057000 | 0.34239688692600 | 0.27282300269600 | T | T | T |
| 0.82559635458500 | 0.34237644495300 | 0.60617488995100 | T | T | T |
| 0.82556703852600 | 0.34240453036000 | 0.93948898912900 | T | T | T |
| 0.16913987665400 | 0.30784431053000 | 0.20104941061100 | T | T | T |
| 0.16048387292000 | 0.30652190502200 | 0.53071843497500 | T | T | T |
| 0.16049134271600 | 0.30649260189800 | 0.86406395547300 | T | T | T |
| 0.49373961583300 | 0.30661669209900 | 0.19733784589500 | T | T | T |
| 0.49376590585200 | 0.30653290906300 | 0.53068204838900 | T | T | T |
| 0.49377748300400 | 0.30654955585500 | 0.86402739292000 | T | T | T |
| 0.82703769230300 | 0.30660423764700 | 0.19731577553000 | T | T | T |
| 0.82712677316500 | 0.30655030151400 | 0.53069961334800 | T | T | T |
| 0.82711868191200 | 0.30653409440500 | 0.86401860526900 | T | T | T |
| 0.23228188902500 | 0.87713902349800 | 0.22220792060400 | T | T | T |
| 0.22281138158200 | 0.89372347937300 | 0.56966951479700 | T | T | T |
| 0.22279079972300 | 0.89370179749300 | 0.90300913124200 | T | T | T |

|                  |                  |                  |   |   |   |
|------------------|------------------|------------------|---|---|---|
| 0.55619134675400 | 0.89371688454700 | 0.23633767791700 | T | T | T |
| 0.55616017223200 | 0.89372907825800 | 0.56966914751500 | T | T | T |
| 0.55615872558900 | 0.89370883996500 | 0.90300213279000 | T | T | T |
| 0.88949180420000 | 0.89372128598800 | 0.23633207578900 | T | T | T |
| 0.88948523148100 | 0.89372771573600 | 0.56966827656900 | T | T | T |
| 0.88950415148200 | 0.89370786449700 | 0.90300632270200 | T | T | T |
| 0.17531583072600 | 0.88699088022800 | 0.22742633406700 | T | T | T |
| 0.16815966264400 | 0.88696475250300 | 0.56339328702200 | T | T | T |
| 0.16817606155800 | 0.88694791765900 | 0.89672365070400 | T | T | T |
| 0.50147946713100 | 0.88689254593600 | 0.23014666455300 | T | T | T |
| 0.50148125931900 | 0.88695605156000 | 0.56341742651000 | T | T | T |
| 0.50150069835100 | 0.88693136092000 | 0.89676680796900 | T | T | T |
| 0.83483346862600 | 0.88689243063000 | 0.23014517215600 | T | T | T |
| 0.83482536441900 | 0.88694001526900 | 0.56342936188000 | T | T | T |
| 0.83481365266000 | 0.88694816865500 | 0.89675534085700 | T | T | T |
| 0.16765261955500 | 0.91800566742600 | 0.27751496718700 | T | T | T |
| 0.16016121157800 | 0.92157673772700 | 0.60769165291600 | T | T | T |
| 0.16020654881400 | 0.92160444276000 | 0.94105513644700 | T | T | T |
| 0.49340637678000 | 0.92157212515200 | 0.27432865452500 | T | T | T |
| 0.49346581710600 | 0.92157327693800 | 0.60767660689000 | T | T | T |
| 0.49347110929200 | 0.92155599938800 | 0.94101850911800 | T | T | T |
| 0.82675575315100 | 0.92156193341800 | 0.27434566279200 | T | T | T |
| 0.82680867032400 | 0.92158110794900 | 0.60768115087100 | T | T | T |
| 0.82677924092800 | 0.92155222152100 | 0.94100724564200 | T | T | T |
| 0.16819360030400 | 0.95449060973400 | 0.20120904057000 | T | T | T |
| 0.15962571063500 | 0.95614978869600 | 0.53080548281600 | T | T | T |
| 0.15962643493300 | 0.95617154594600 | 0.86415721131900 | T | T | T |
| 0.49292624664700 | 0.95606356600000 | 0.19740566575800 | T | T | T |
| 0.49292575299300 | 0.95613526415200 | 0.53076044445600 | T | T | T |
| 0.49293870518500 | 0.95612393787400 | 0.86410699642300 | T | T | T |

|                  |                  |                  |   |   |   |
|------------------|------------------|------------------|---|---|---|
| 0.82620307527900 | 0.95607681766900 | 0.19738829427900 | T | T | T |
| 0.82629055038600 | 0.95612542537700 | 0.53077756574400 | T | T | T |
| 0.82627817217100 | 0.95613015864300 | 0.86409376053100 | T | T | T |
| 0.24768895041600 | 0.30731664255800 | 0.19472311214800 | T | T | T |
| 0.20961321873700 | 0.31749767676100 | 0.51046299744100 | T | T | T |
| 0.20961415479300 | 0.31747678883400 | 0.84381067457000 | T | T | T |
| 0.54296623386900 | 0.31750062264800 | 0.17702777832500 | T | T | T |
| 0.54296904385300 | 0.31748106583800 | 0.51042259546400 | T | T | T |
| 0.54294644896900 | 0.31750072508800 | 0.84374784138700 | T | T | T |
| 0.87628743607400 | 0.31755421230300 | 0.17699299629100 | T | T | T |
| 0.87628652021000 | 0.31749047084400 | 0.51041820025800 | T | T | T |
| 0.87631878126600 | 0.31748375613800 | 0.84377197292600 | T | T | T |
| 0.24769425942000 | 0.95632836205800 | 0.19427066646400 | T | T | T |
| 0.23470492785300 | 0.33515910463300 | 0.47363145005800 | T | T | T |
| 0.23467285605900 | 0.33517719915700 | 0.80696788054300 | T | T | T |
| 0.56807950582100 | 0.33521802439100 | 0.14022695886800 | T | T | T |
| 0.56805881469800 | 0.33519144827500 | 0.47360110423200 | T | T | T |
| 0.56804599650600 | 0.33519697888400 | 0.80693211610200 | T | T | T |
| 0.90158305881600 | 0.33524634746000 | 0.14029601397800 | T | T | T |
| 0.90135150314000 | 0.33518642051900 | 0.47358117605200 | T | T | T |
| 0.90138380740200 | 0.33520345336200 | 0.80693577130200 | T | T | T |
| 0.20550403062000 | 0.45393190219900 | 0.16342950553100 | T | T | T |
| 0.20921230592200 | 0.94634379703100 | 0.51140154737100 | T | T | T |
| 0.20920561189500 | 0.94635588155000 | 0.84474803298900 | T | T | T |
| 0.54264378977000 | 0.94633262078200 | 0.17795137986700 | T | T | T |
| 0.54260974579400 | 0.94636020227400 | 0.51135748959400 | T | T | T |
| 0.54257785425100 | 0.94633074163900 | 0.84467798386400 | T | T | T |
| 0.87594065789900 | 0.94629969886100 | 0.17795418696500 | T | T | T |
| 0.87592320869600 | 0.94633567087700 | 0.51134227242700 | T | T | T |
| 0.87596246822900 | 0.94636048228300 | 0.84470634545900 | T | T | T |



|                  |                  |                  |   |   |   |
|------------------|------------------|------------------|---|---|---|
| 0.20532408300700 | 0.81360553068900 | 0.16336104854500 | T | T | T |
| 0.23466445995300 | 0.92822709751500 | 0.47487718317300 | T | T | T |
| 0.23463593028000 | 0.92820438951400 | 0.80821857334700 | T | T | T |
| 0.56798714935400 | 0.92812659136500 | 0.14136822993300 | T | T | T |
| 0.56798908335800 | 0.92817587879500 | 0.47479569652800 | T | T | T |
| 0.56798165961500 | 0.92816871446300 | 0.80812994005600 | T | T | T |
| 0.90146020598000 | 0.92809354933400 | 0.14148305517900 | T | T | T |
| 0.90129057704600 | 0.92817811289400 | 0.47476905393000 | T | T | T |
| 0.90131638294300 | 0.92816214104700 | 0.80813053137500 | T | T | T |
| 0.21250494881000 | 0.41782966927900 | 0.16221608354700 | T | T | T |
| 0.21811271216300 | 0.30664521065700 | 0.48754330513000 | T | T | T |
| 0.21809219379200 | 0.30664363604700 | 0.82087877859600 | T | T | T |
| 0.55146050356200 | 0.30670069886800 | 0.15413920287500 | T | T | T |
| 0.55146382118300 | 0.30665409059300 | 0.48751421953100 | T | T | T |
| 0.55144100589700 | 0.30667246893000 | 0.82083945161400 | T | T | T |
| 0.88491203351800 | 0.30673754553900 | 0.15416833088400 | T | T | T |
| 0.88475610820800 | 0.30666857333700 | 0.48749748122700 | T | T | T |
| 0.88479890798000 | 0.30666532396600 | 0.82085536994800 | T | T | T |
| 0.21174625098800 | 0.85001416618900 | 0.16317276202300 | T | T | T |
| 0.21798951483800 | 0.95694504131300 | 0.48850376052600 | T | T | T |
| 0.21796519772100 | 0.95693870910600 | 0.82183948441100 | T | T | T |
| 0.55134716983600 | 0.95686734851200 | 0.15505157761500 | T | T | T |
| 0.55134372392100 | 0.95692741693900 | 0.48845359754700 | T | T | T |
| 0.55131932692200 | 0.95690345250600 | 0.82177696368500 | T | T | T |
| 0.88477637310700 | 0.95683992424100 | 0.15511430448300 | T | T | T |
| 0.88463727138100 | 0.95690358394700 | 0.48842898005200 | T | T | T |
| 0.88468148791500 | 0.95691645462600 | 0.82179404358400 | T | T | T |

**7) Large supercell 2-H<sub>sol</sub><sup>+</sup> IS**

POSCAR

1

46.81727999995964 0.00000000000000 0.00000000000000  
0.000000000000000 30.38812199999634 0.00000000000000  
0.000000000000000 0.00000000000000 49.65722999997833

Ga P H O C

540 540 342 180 18

Direct

0.00062808520253 0.01602869512860 0.00897157017624 T T T  
0.00062820803841 0.01603041832940 0.34230243433300 T T T  
0.00062811617555 0.01602782302560 0.67563674393000 T T T  
0.33395977719800 0.01602813649550 0.00897144639485 T T T  
0.33395947434900 0.01602974526520 0.34230244957000 T T T  
0.33395988858800 0.01602739473520 0.67563680595600 T T T  
0.66729462372400 0.01602621687100 0.00897096163230 T T T  
0.66729466391800 0.01602732418290 0.34230232695400 T T T  
0.66729462853200 0.01602574704190 0.67563690513200 T T T  
0.33212478745200 0.01505726519330 0.22606428300500 T T T  
0.33212524161900 0.01505505051450 0.55939629213500 T T T  
0.33212539265300 0.01505525912360 0.89273126597300 T T T  
0.66546018721300 0.01505510691310 0.22606388017600 T T T  
0.66546031411500 0.01505329221640 0.55939626636400 T T T  
0.66546021227400 0.01505378965080 0.89273091959800 T T T  
0.99879373746000 0.01505792715180 0.22606438576800 T T T  
0.99879383065800 0.01505555297250 0.55939628352700 T T T  
0.99879368594500 0.01505569699600 0.89273138102500 T T T  
0.00117712867804 0.01694042989980 0.11764804809800 T T T  
0.00117724191049 0.01693932045100 0.45097846335300 T T T  
0.00117714580064 0.01693880046740 0.78431354188000 T T T  
0.33450860654900 0.01693971251470 0.11764786237700 T T T  
0.33450869648000 0.01693868408080 0.45097842088800 T T T

|                  |                  |                  |   |   |   |
|------------------|------------------|------------------|---|---|---|
| 0.33450904942200 | 0.01693839005370 | 0.78431346418700 | T | T | T |
| 0.66784366169400 | 0.01693739746730 | 0.11764728512000 | T | T | T |
| 0.66784374486300 | 0.01693639509840 | 0.45097825025700 | T | T | T |
| 0.66784369596100 | 0.01693689966980 | 0.78431326175200 | T | T | T |
| 0.16634866183800 | 0.01569843170430 | 0.00900736822273 | T | T | T |
| 0.16634867440700 | 0.01570005500970 | 0.34233828594900 | T | T | T |
| 0.16634864275600 | 0.01569767084820 | 0.67567259701300 | T | T | T |
| 0.49968124995800 | 0.01569638014670 | 0.00900699108833 | T | T | T |
| 0.49968108691300 | 0.01569739369600 | 0.34233836858000 | T | T | T |
| 0.49968128022600 | 0.01569586640760 | 0.67567284336000 | T | T | T |
| 0.83301670319300 | 0.01569714378970 | 0.00900714676329 | T | T | T |
| 0.83301698015400 | 0.01569833098910 | 0.34233835593400 | T | T | T |
| 0.83301653383500 | 0.01569652787040 | 0.67567278197000 | T | T | T |
| 0.16371881594300 | 0.01211934903020 | 0.22565207047100 | T | T | T |
| 0.16371864621300 | 0.01211712256260 | 0.55898397001800 | T | T | T |
| 0.16371870802800 | 0.01211708454250 | 0.89231895348800 | T | T | T |
| 0.49705112222800 | 0.01211693615490 | 0.22565152957200 | T | T | T |
| 0.49705109653200 | 0.01211520570590 | 0.55898389058900 | T | T | T |
| 0.49705132501200 | 0.01211547672140 | 0.89231852603400 | T | T | T |
| 0.83038716372000 | 0.01211774705090 | 0.22565172620700 | T | T | T |
| 0.83038677094100 | 0.01211584688720 | 0.55898394459800 | T | T | T |
| 0.83038658503400 | 0.01211603842440 | 0.89231869582600 | T | T | T |
| 0.16328528115100 | 0.98084816998100 | 0.10284031914900 | T | T | T |
| 0.16328520405700 | 0.98084768085700 | 0.43617085071000 | T | T | T |
| 0.16328524454000 | 0.98084641098800 | 0.76950586958900 | T | T | T |
| 0.49661765155600 | 0.98084575202600 | 0.10283985366400 | T | T | T |
| 0.49661754297900 | 0.98084518693700 | 0.43617099696400 | T | T | T |
| 0.49661784444600 | 0.98084471591900 | 0.76950584261800 | T | T | T |
| 0.82995368127300 | 0.98084659375200 | 0.10284005440400 | T | T | T |
| 0.82995363538000 | 0.98084602150600 | 0.43617101957800 | T | T | T |

|                  |                  |                  |   |   |   |
|------------------|------------------|------------------|---|---|---|
| 0.82995322415300 | 0.98084530075500 | 0.76950591233200 | T | T | T |
| 0.08355668808060 | 0.01593607438220 | 0.00898445962959 | T | T | T |
| 0.08355672141340 | 0.01593748457930 | 0.34231533648000 | T | T | T |
| 0.08355677362860 | 0.01593532637670 | 0.67564959803700 | T | T | T |
| 0.41688881264300 | 0.01593470701540 | 0.00898418571820 | T | T | T |
| 0.41688852574600 | 0.01593573399230 | 0.34231539837500 | T | T | T |
| 0.41688894081600 | 0.01593415168570 | 0.67564976768800 | T | T | T |
| 0.75022420417900 | 0.01593417767080 | 0.00898399498314 | T | T | T |
| 0.75022434841000 | 0.01593508879420 | 0.34231532762000 | T | T | T |
| 0.75022416525300 | 0.01593371702770 | 0.67564979771900 | T | T | T |
| 0.08143280740460 | 0.01885057817750 | 0.22829090846500 | T | T | T |
| 0.08143298126420 | 0.01884788996670 | 0.56162274013300 | T | T | T |
| 0.08143294640910 | 0.01884804887870 | 0.89495790733600 | T | T | T |
| 0.41476455086700 | 0.01884858017400 | 0.22829052259900 | T | T | T |
| 0.41476495954500 | 0.01884635645810 | 0.56162268987800 | T | T | T |
| 0.41476513054800 | 0.01884677770350 | 0.89495760073900 | T | T | T |
| 0.74810051911100 | 0.01884782639540 | 0.22829040962700 | T | T | T |
| 0.74810054984600 | 0.01884571550060 | 0.56162271316700 | T | T | T |
| 0.74810038771200 | 0.01884630029440 | 0.89495750369400 | T | T | T |
| 0.08517334604600 | 0.01510261607960 | 0.12137102009300 | T | T | T |
| 0.08517352381010 | 0.01510163287140 | 0.45470138248800 | T | T | T |
| 0.08517353835600 | 0.01510086309430 | 0.78803649299000 | T | T | T |
| 0.41850539247700 | 0.01510088179070 | 0.12137041960400 | T | T | T |
| 0.41850553123400 | 0.01509999475020 | 0.45470124114600 | T | T | T |
| 0.41850585541100 | 0.01509978709750 | 0.78803626877600 | T | T | T |
| 0.75184110843600 | 0.01510026016900 | 0.12137027832500 | T | T | T |
| 0.75184125405900 | 0.01509935488870 | 0.45470121451100 | T | T | T |
| 0.75184098964400 | 0.01509941414030 | 0.78803625457100 | T | T | T |
| 0.24987238811800 | 0.01592376735310 | 0.00756777496676 | T | T | T |
| 0.24987227816400 | 0.01592528836890 | 0.34089862896800 | T | T | T |

|                  |                  |                  |   |   |   |
|------------------|------------------|------------------|---|---|---|
| 0.24987237126900 | 0.01592302564610 | 0.67423292789500 | T | T | T |
| 0.58320594115200 | 0.01592148068920 | 0.00756726569402 | T | T | T |
| 0.58320591847300 | 0.01592240487220 | 0.34089861484700 | T | T | T |
| 0.58320594271000 | 0.01592103702700 | 0.67423313208300 | T | T | T |
| 0.91654060855800 | 0.01592329730770 | 0.00756771625814 | T | T | T |
| 0.91654086970200 | 0.01592460932550 | 0.34089866136400 | T | T | T |
| 0.91654048583300 | 0.01592255613800 | 0.67423299141900 | T | T | T |
| 0.24804566027600 | 0.01596767302640 | 0.22970791107500 | T | T | T |
| 0.24804551271200 | 0.01596473834470 | 0.56303979677300 | T | T | T |
| 0.24804559059900 | 0.01596501677730 | 0.89637492436900 | T | T | T |
| 0.58137919975300 | 0.01596431981720 | 0.22970725182000 | T | T | T |
| 0.58137899771900 | 0.01596208689910 | 0.56303969834700 | T | T | T |
| 0.58137908499700 | 0.01596285878860 | 0.89637440978800 | T | T | T |
| 0.91471430975100 | 0.01596685860430 | 0.22970768139200 | T | T | T |
| 0.91471385545000 | 0.01596412511050 | 0.56303972384000 | T | T | T |
| 0.91471370106800 | 0.01596453296380 | 0.89637480620800 | T | T | T |
| 0.25410145643400 | 0.01877359826590 | 0.11586010130700 | T | T | T |
| 0.25410130992400 | 0.01877265413760 | 0.44919041484100 | T | T | T |
| 0.25410143344500 | 0.01877201210710 | 0.78252560798200 | T | T | T |
| 0.58743504811700 | 0.01877088681670 | 0.11585925667500 | T | T | T |
| 0.58743490384200 | 0.01877001352150 | 0.44919016284600 | T | T | T |
| 0.58743499513800 | 0.01877026782390 | 0.78252532628800 | T | T | T |
| 0.92076992553100 | 0.01877307999840 | 0.11585986616700 | T | T | T |
| 0.92076981317900 | 0.01877210435250 | 0.44919031961700 | T | T | T |
| 0.92076948394600 | 0.01877162914410 | 0.78252552598500 | T | T | T |
| 0.12727411270500 | 0.06451082922650 | 0.05580577777300 | T | T | T |
| 0.12727416077700 | 0.06451119789950 | 0.38913603823300 | T | T | T |
| 0.12727416105200 | 0.06451033314980 | 0.72247115396000 | T | T | T |
| 0.46060625420800 | 0.06450996536480 | 0.05580563432620 | T | T | T |
| 0.46060608187700 | 0.06451019600290 | 0.38913650356400 | T | T | T |

|                  |                  |                  |   |   |   |
|------------------|------------------|------------------|---|---|---|
| 0.46060645113000 | 0.06450966751860 | 0.72247149005500 | T | T | T |
| 0.79394224345600 | 0.06451004692710 | 0.05580553978650 | T | T | T |
| 0.79394240716300 | 0.06451027132180 | 0.38913633177700 | T | T | T |
| 0.79394195856600 | 0.06450972738100 | 0.72247139667900 | T | T | T |
| 0.12495392977600 | 0.06472779616490 | 0.27776958296100 | T | T | T |
| 0.12495400788400 | 0.06472663344470 | 0.61110297892200 | T | T | T |
| 0.12495402799700 | 0.06472672965750 | 0.94443797785500 | T | T | T |
| 0.45828576842300 | 0.06472678779380 | 0.27776985611200 | T | T | T |
| 0.45828614142400 | 0.06472588761310 | 0.61110345617200 | T | T | T |
| 0.45828627042900 | 0.06472603421330 | 0.94443792971500 | T | T | T |
| 0.79162230865100 | 0.06472689098430 | 0.27776987732400 | T | T | T |
| 0.79162206149100 | 0.06472595781210 | 0.61110349116300 | T | T | T |
| 0.79162197703700 | 0.06472608816450 | 0.94443793219900 | T | T | T |
| 0.12544944888800 | 0.06373919592570 | 0.16369536649400 | T | T | T |
| 0.12544971847300 | 0.06373861893290 | 0.49702606203900 | T | T | T |
| 0.12544976540100 | 0.06373832552560 | 0.83036122496400 | T | T | T |
| 0.45878165011200 | 0.06373831732210 | 0.16369497393400 | T | T | T |
| 0.45878194643600 | 0.06373780408540 | 0.49702615338800 | T | T | T |
| 0.45878223536300 | 0.06373775083630 | 0.83036105172300 | T | T | T |
| 0.79211793860500 | 0.06373830621420 | 0.16369500306600 | T | T | T |
| 0.79211808032500 | 0.06373777076440 | 0.49702616433400 | T | T | T |
| 0.79211769721400 | 0.06373772880470 | 0.83036107952500 | T | T | T |
| 0.29222421460900 | 0.06400230513840 | 0.05350088081950 | T | T | T |
| 0.29222403584800 | 0.06400274118710 | 0.38683105945300 | T | T | T |
| 0.29222435000000 | 0.06400183381250 | 0.72016613880200 | T | T | T |
| 0.62555854985400 | 0.06400119669220 | 0.05350057567580 | T | T | T |
| 0.62555853306500 | 0.06400146062760 | 0.38683134108700 | T | T | T |
| 0.62555856265600 | 0.06400097961340 | 0.72016639643600 | T | T | T |
| 0.95889289742100 | 0.06400227604310 | 0.05350087917580 | T | T | T |
| 0.95889304873400 | 0.06400268105240 | 0.38683106623400 | T | T | T |

|                  |                  |                  |   |   |   |
|------------------|------------------|------------------|---|---|---|
| 0.95889274265600 | 0.06400177625120 | 0.72016614886600 | T | T | T |
| 0.29192427094600 | 0.06408249068000 | 0.27650972456700 | T | T | T |
| 0.29192465899000 | 0.06408136335170 | 0.60984348852200 | T | T | T |
| 0.29192474066400 | 0.06408146893070 | 0.94317828769000 | T | T | T |
| 0.62525911540300 | 0.06408147442390 | 0.27651023134200 | T | T | T |
| 0.62525919413700 | 0.06408059466500 | 0.60984423945400 | T | T | T |
| 0.62525915214700 | 0.06408070066410 | 0.94317830729000 | T | T | T |
| 0.95859356321200 | 0.06408250952570 | 0.27650977041600 | T | T | T |
| 0.95859340314500 | 0.06408137254450 | 0.60984351028500 | T | T | T |
| 0.95859330755000 | 0.06408148539760 | 0.94317834454900 | T | T | T |
| 0.29181257693700 | 0.06449392003380 | 0.16540647479000 | T | T | T |
| 0.29181286006600 | 0.06449319625620 | 0.49873721335200 | T | T | T |
| 0.29181308759000 | 0.06449299547970 | 0.83207241163500 | T | T | T |
| 0.62514738469600 | 0.06449277835160 | 0.16540622565900 | T | T | T |
| 0.62514751020700 | 0.06449211220730 | 0.49873750635900 | T | T | T |
| 0.62514746001200 | 0.06449222676000 | 0.83207234092000 | T | T | T |
| 0.95848170689900 | 0.06449391490160 | 0.16540640450800 | T | T | T |
| 0.95848180731500 | 0.06449317233710 | 0.49873717518700 | T | T | T |
| 0.95848152423700 | 0.06449296891020 | 0.83207241235900 | T | T | T |
| 0.04317520849090 | 0.06412564754760 | 0.05523398491630 | T | T | T |
| 0.04317535735650 | 0.06412609727980 | 0.38856415832000 | T | T | T |
| 0.04317534697010 | 0.06412516970450 | 0.72189920934500 | T | T | T |
| 0.37650683489300 | 0.06412515210150 | 0.05523388121970 | T | T | T |
| 0.37650668337300 | 0.06412551263190 | 0.38856435662000 | T | T | T |
| 0.37650718914800 | 0.06412478997220 | 0.72189935163800 | T | T | T |
| 0.70984250690600 | 0.06412457612760 | 0.05523368963250 | T | T | T |
| 0.70984266607000 | 0.06412485239610 | 0.38856445769700 | T | T | T |
| 0.70984248057300 | 0.06412435791480 | 0.72189946130800 | T | T | T |
| 0.04130436614440 | 0.06441586872510 | 0.27776588310900 | T | T | T |
| 0.04130445495210 | 0.06441463002040 | 0.61109946876100 | T | T | T |

|                  |                  |                  |   |   |   |
|------------------|------------------|------------------|---|---|---|
| 0.04130432352170 | 0.06441474211540 | 0.94443445897600 | T | T | T |
| 0.37463542557200 | 0.06441530966160 | 0.27776619089000 | T | T | T |
| 0.37463596773400 | 0.06441422586760 | 0.61109985708700 | T | T | T |
| 0.37463601721500 | 0.06441434915720 | 0.94443451200300 | T | T | T |
| 0.70797154024500 | 0.06441470617020 | 0.27776632775600 | T | T | T |
| 0.70797152493300 | 0.06441376121000 | 0.61110019295800 | T | T | T |
| 0.70797142998700 | 0.06441388674820 | 0.94443440929000 | T | T | T |
| 0.04140538312370 | 0.06466190116010 | 0.16548438355100 | T | T | T |
| 0.04140542008210 | 0.06466114824740 | 0.49881509545000 | T | T | T |
| 0.04140533937600 | 0.06466090209680 | 0.83215030729700 | T | T | T |
| 0.37473653789700 | 0.06466132414440 | 0.16548414821000 | T | T | T |
| 0.37473673304700 | 0.06466063977890 | 0.49881513965700 | T | T | T |
| 0.37473709911600 | 0.06466054220400 | 0.83215017843200 | T | T | T |
| 0.70807252274900 | 0.06466069108680 | 0.16548413700100 | T | T | T |
| 0.70807253705900 | 0.06466001946050 | 0.49881540283100 | T | T | T |
| 0.70807236946600 | 0.06466011112440 | 0.83215022239400 | T | T | T |
| 0.20583648959800 | 0.06424228362850 | 0.05518634592580 | T | T | T |
| 0.20583637234200 | 0.06424267916410 | 0.38851653429100 | T | T | T |
| 0.20583639831600 | 0.06424176252420 | 0.72185158890500 | T | T | T |
| 0.53916930299900 | 0.06424120085940 | 0.05518610062260 | T | T | T |
| 0.53916916762700 | 0.06424141703100 | 0.38851692935100 | T | T | T |
| 0.53916935289500 | 0.06424091347990 | 0.72185190188600 | T | T | T |
| 0.87250485807600 | 0.06424173909890 | 0.05518633788760 | T | T | T |
| 0.87250498285700 | 0.06424202955720 | 0.38851684669800 | T | T | T |
| 0.87250447615600 | 0.06424131029290 | 0.72185181557300 | T | T | T |
| 0.20784449893600 | 0.06421431695510 | 0.27765834345300 | T | T | T |
| 0.20784421979800 | 0.06421322163250 | 0.61099196221100 | T | T | T |
| 0.20784427145300 | 0.06421330349590 | 0.94432685835100 | T | T | T |
| 0.54117726029000 | 0.06421321621780 | 0.27765884198200 | T | T | T |
| 0.54117706854200 | 0.06421240240000 | 0.61099270159600 | T | T | T |



|                   |                  |                   |   |   |   |
|-------------------|------------------|-------------------|---|---|---|
| 0.54117720165400  | 0.06421249457890 | 0.94432686602400  | T | T | T |
| 0.87451319393600  | 0.06421377619870 | 0.27765846874800  | T | T | T |
| 0.87451251488300  | 0.06421281838300 | 0.61099220570400  | T | T | T |
| 0.87451246659500  | 0.06421293853380 | 0.94432683962000  | T | T | T |
| 0.20796664441200  | 0.06663313998920 | 0.16715218988500  | T | T | T |
| 0.20796617361000  | 0.06663244429710 | 0.50048286313000  | T | T | T |
| 0.20796622833600  | 0.06663231131210 | 0.83381809154800  | T | T | T |
| 0.54129918268700  | 0.06663196533760 | 0.16715169403300  | T | T | T |
| 0.54129876175000  | 0.06663137329580 | 0.50048301120700  | T | T | T |
| 0.54129903802200  | 0.06663153617910 | 0.83381787783900  | T | T | T |
| 0.87463511812900  | 0.06663258803790 | 0.16715194455500  | T | T | T |
| 0.87463453484000  | 0.06663192197440 | 0.50048292362000  | T | T | T |
| 0.87463420538500  | 0.06663192952130 | 0.83381802025200  | T | T | T |
| 0.00000000000000  | 0.13043999673400 | 0.00000000000000  | F | F | F |
| 0.00000000000000  | 0.13043999673400 | 0.333333333333400 | F | F | F |
| 0.00000000000000  | 0.13043999673400 | 0.666666666666600 | F | F | F |
| 0.333333333333400 | 0.13043999673400 | 0.000000000000000 | F | F | F |
| 0.333333333333400 | 0.13043999673400 | 0.333333333333400 | F | F | F |
| 0.333333333333400 | 0.13043999673400 | 0.666666666666600 | F | F | F |
| 0.666666666666600 | 0.13043999673400 | 0.000000000000000 | F | F | F |
| 0.666666666666600 | 0.13043999673400 | 0.333333333333400 | F | F | F |
| 0.666666666666600 | 0.13043999673400 | 0.666666666666600 | F | F | F |
| 0.000000000000000 | 0.13043999673400 | 0.22222334138000  | F | F | F |
| 0.000000000000000 | 0.13043999673400 | 0.55555667471300  | F | F | F |
| 0.000000000000000 | 0.13043999673400 | 0.88889000804700  | F | F | F |
| 0.333333333333400 | 0.13043999673400 | 0.22222334138000  | F | F | F |
| 0.333333333333400 | 0.13043999673400 | 0.55555667471300  | F | F | F |
| 0.333333333333400 | 0.13043999673400 | 0.88889000804700  | F | F | F |
| 0.666666666666600 | 0.13043999673400 | 0.22222334138000  | F | F | F |
| 0.666666666666600 | 0.13043999673400 | 0.55555667471300  | F | F | F |

|                   |                  |                   |   |   |   |
|-------------------|------------------|-------------------|---|---|---|
| 0.666666666666600 | 0.13043999673400 | 0.88889000804700  | F | F | F |
| 0.000000000000000 | 0.13043999673400 | 0.11111000180100  | F | F | F |
| 0.000000000000000 | 0.13043999673400 | 0.44444333513300  | F | F | F |
| 0.000000000000000 | 0.13043999673400 | 0.77777666846700  | F | F | F |
| 0.33333333333400  | 0.13043999673400 | 0.11111000180100  | F | F | F |
| 0.33333333333400  | 0.13043999673400 | 0.44444333513300  | F | F | F |
| 0.33333333333400  | 0.13043999673400 | 0.77777666846700  | F | F | F |
| 0.666666666666600 | 0.13043999673400 | 0.11111000180100  | F | F | F |
| 0.666666666666600 | 0.13043999673400 | 0.44444333513300  | F | F | F |
| 0.666666666666600 | 0.13043999673400 | 0.77777666846700  | F | F | F |
| 0.16666666667500  | 0.13043999673400 | 0.000000000000000 | F | F | F |
| 0.16666666667500  | 0.13043999673400 | 0.33333333333400  | F | F | F |
| 0.16666666667500  | 0.13043999673400 | 0.666666666666600 | F | F | F |
| 0.50000000000900  | 0.13043999673400 | 0.000000000000000 | F | F | F |
| 0.50000000000900  | 0.13043999673400 | 0.33333333333400  | F | F | F |
| 0.50000000000900  | 0.13043999673400 | 0.666666666666600 | F | F | F |
| 0.83333333334100  | 0.13043999673400 | 0.000000000000000 | F | F | F |
| 0.83333333334100  | 0.13043999673400 | 0.33333333333400  | F | F | F |
| 0.83333333334100  | 0.13043999673400 | 0.666666666666600 | F | F | F |
| 0.16666666667500  | 0.13043999673400 | 0.22222334138000  | F | F | F |
| 0.16666666667500  | 0.13043999673400 | 0.55555667471300  | F | F | F |
| 0.16666666667500  | 0.13043999673400 | 0.88889000804700  | F | F | F |
| 0.50000000000900  | 0.13043999673400 | 0.22222334138000  | F | F | F |
| 0.50000000000900  | 0.13043999673400 | 0.55555667471300  | F | F | F |
| 0.50000000000900  | 0.13043999673400 | 0.88889000804700  | F | F | F |
| 0.83333333334100  | 0.13043999673400 | 0.22222334138000  | F | F | F |
| 0.83333333334100  | 0.13043999673400 | 0.55555667471300  | F | F | F |
| 0.83333333334100  | 0.13043999673400 | 0.88889000804700  | F | F | F |
| 0.16666666667500  | 0.13043999673400 | 0.11111000180100  | F | F | F |
| 0.16666666667500  | 0.13043999673400 | 0.44444333513300  | F | F | F |

|                  |                  |                  |   |   |   |
|------------------|------------------|------------------|---|---|---|
| 0.16666666667500 | 0.13043999673400 | 0.77777666846700 | F | F | F |
| 0.50000000000900 | 0.13043999673400 | 0.11111000180100 | F | F | F |
| 0.50000000000900 | 0.13043999673400 | 0.44444333513300 | F | F | F |
| 0.50000000000900 | 0.13043999673400 | 0.77777666846700 | F | F | F |
| 0.83333333334100 | 0.13043999673400 | 0.11111000180100 | F | F | F |
| 0.83333333334100 | 0.13043999673400 | 0.44444333513300 | F | F | F |
| 0.83333333334100 | 0.13043999673400 | 0.77777666846700 | F | F | F |
| 0.08333333332670 | 0.13043999673400 | 0.00000000000000 | F | F | F |
| 0.08333333332670 | 0.13043999673400 | 0.33333333333400 | F | F | F |
| 0.08333333332670 | 0.13043999673400 | 0.66666666666600 | F | F | F |
| 0.41666666666100 | 0.13043999673400 | 0.00000000000000 | F | F | F |
| 0.41666666666100 | 0.13043999673400 | 0.33333333333400 | F | F | F |
| 0.41666666666100 | 0.13043999673400 | 0.66666666666600 | F | F | F |
| 0.74999999999300 | 0.13043999673400 | 0.00000000000000 | F | F | F |
| 0.74999999999300 | 0.13043999673400 | 0.33333333333400 | F | F | F |
| 0.74999999999300 | 0.13043999673400 | 0.66666666666600 | F | F | F |
| 0.08333333332670 | 0.13043999673400 | 0.22222334138000 | F | F | F |
| 0.08333333332670 | 0.13043999673400 | 0.55555667471300 | F | F | F |
| 0.08333333332670 | 0.13043999673400 | 0.88889000804700 | F | F | F |
| 0.41666666666100 | 0.13043999673400 | 0.22222334138000 | F | F | F |
| 0.41666666666100 | 0.13043999673400 | 0.55555667471300 | F | F | F |
| 0.41666666666100 | 0.13043999673400 | 0.88889000804700 | F | F | F |
| 0.74999999999300 | 0.13043999673400 | 0.22222334138000 | F | F | F |
| 0.74999999999300 | 0.13043999673400 | 0.55555667471300 | F | F | F |
| 0.74999999999300 | 0.13043999673400 | 0.88889000804700 | F | F | F |
| 0.08333333332670 | 0.13043999673400 | 0.11111000180100 | F | F | F |
| 0.08333333332670 | 0.13043999673400 | 0.44444333513300 | F | F | F |
| 0.08333333332670 | 0.13043999673400 | 0.77777666846700 | F | F | F |
| 0.41666666666100 | 0.13043999673400 | 0.11111000180100 | F | F | F |
| 0.41666666666100 | 0.13043999673400 | 0.44444333513300 | F | F | F |

|                  |                  |                  |   |   |   |
|------------------|------------------|------------------|---|---|---|
| 0.41666666666100 | 0.13043999673400 | 0.77777666846700 | F | F | F |
| 0.74999999999300 | 0.13043999673400 | 0.11111000180100 | F | F | F |
| 0.74999999999300 | 0.13043999673400 | 0.44444333513300 | F | F | F |
| 0.74999999999300 | 0.13043999673400 | 0.77777666846700 | F | F | F |
| 0.25000000008900 | 0.13043999673400 | 0.00000000000000 | F | F | F |
| 0.25000000008900 | 0.13043999673400 | 0.33333333333400 | F | F | F |
| 0.25000000008900 | 0.13043999673400 | 0.66666666666600 | F | F | F |
| 0.58333333342100 | 0.13043999673400 | 0.00000000000000 | F | F | F |
| 0.58333333342100 | 0.13043999673400 | 0.33333333333400 | F | F | F |
| 0.58333333342100 | 0.13043999673400 | 0.66666666666600 | F | F | F |
| 0.91666666675500 | 0.13043999673400 | 0.00000000000000 | F | F | F |
| 0.91666666675500 | 0.13043999673400 | 0.33333333333400 | F | F | F |
| 0.91666666675500 | 0.13043999673400 | 0.66666666666600 | F | F | F |
| 0.25000000008900 | 0.13043999673400 | 0.22222334138000 | F | F | F |
| 0.25000000008900 | 0.13043999673400 | 0.55555667471300 | F | F | F |
| 0.25000000008900 | 0.13043999673400 | 0.88889000804700 | F | F | F |
| 0.58333333342100 | 0.13043999673400 | 0.22222334138000 | F | F | F |
| 0.58333333342100 | 0.13043999673400 | 0.55555667471300 | F | F | F |
| 0.58333333342100 | 0.13043999673400 | 0.88889000804700 | F | F | F |
| 0.91666666675500 | 0.13043999673400 | 0.22222334138000 | F | F | F |
| 0.91666666675500 | 0.13043999673400 | 0.55555667471300 | F | F | F |
| 0.91666666675500 | 0.13043999673400 | 0.88889000804700 | F | F | F |
| 0.25000000008900 | 0.13043999673400 | 0.11111000180100 | F | F | F |
| 0.25000000008900 | 0.13043999673400 | 0.44444333513300 | F | F | F |
| 0.25000000008900 | 0.13043999673400 | 0.77777666846700 | F | F | F |
| 0.58333333342100 | 0.13043999673400 | 0.11111000180100 | F | F | F |
| 0.58333333342100 | 0.13043999673400 | 0.44444333513300 | F | F | F |
| 0.58333333342100 | 0.13043999673400 | 0.77777666846700 | F | F | F |
| 0.91666666675500 | 0.13043999673400 | 0.11111000180100 | F | F | F |
| 0.91666666675500 | 0.13043999673400 | 0.44444333513300 | F | F | F |

|                  |                  |                  |   |   |   |
|------------------|------------------|------------------|---|---|---|
| 0.91666666675500 | 0.13043999673400 | 0.77777666846700 | F | F | F |
| 0.12608192569100 | 0.19590410664500 | 0.05680701531250 | T | T | T |
| 0.12608195947300 | 0.19590356751100 | 0.39013739564500 | T | T | T |
| 0.12608197109500 | 0.19590475902900 | 0.72347241565800 | T | T | T |
| 0.45941412933500 | 0.19590539348000 | 0.05680685539310 | T | T | T |
| 0.45941397707800 | 0.19590508525500 | 0.39013777096200 | T | T | T |
| 0.45941433248700 | 0.19590580886000 | 0.72347268350500 | T | T | T |
| 0.79274993957900 | 0.19590529392100 | 0.05680678688510 | T | T | T |
| 0.79275007284200 | 0.19590498130300 | 0.39013763429000 | T | T | T |
| 0.79274966989000 | 0.19590572170000 | 0.72347261141600 | T | T | T |
| 0.12509179494500 | 0.19591600076100 | 0.27773989418200 | T | T | T |
| 0.12509183575800 | 0.19591764392200 | 0.61107323636800 | T | T | T |
| 0.12509184564100 | 0.19591754669800 | 0.94440817008600 | T | T | T |
| 0.45842381099500 | 0.19591774196500 | 0.27774003759500 | T | T | T |
| 0.45842411001800 | 0.19591899163900 | 0.61107358765700 | T | T | T |
| 0.45842419192200 | 0.19591872524900 | 0.94440805492400 | T | T | T |
| 0.79175990324500 | 0.19591768065900 | 0.27773999455200 | T | T | T |
| 0.79175966985900 | 0.19591894859800 | 0.61107357120400 | T | T | T |
| 0.79175962893200 | 0.19591866596100 | 0.94440803424100 | T | T | T |
| 0.12545268528400 | 0.19858095127300 | 0.16354489671000 | T | T | T |
| 0.12545292742100 | 0.19858178851300 | 0.49687571465200 | T | T | T |
| 0.12545293734500 | 0.19858221173500 | 0.83021081461500 | T | T | T |
| 0.45878492621100 | 0.19858256158500 | 0.16354458330500 | T | T | T |
| 0.45878518862500 | 0.19858327843300 | 0.49687584402900 | T | T | T |
| 0.45878543899900 | 0.19858327175500 | 0.83021066999200 | T | T | T |
| 0.79212094543500 | 0.19858258867500 | 0.16354462787600 | T | T | T |
| 0.79212107327700 | 0.19858332090700 | 0.49687586883000 | T | T | T |
| 0.79212071626100 | 0.19858327436600 | 0.83021070070900 | T | T | T |
| 0.29216580956500 | 0.19631395638400 | 0.05460535778840 | T | T | T |
| 0.29216563321100 | 0.19631334655000 | 0.38793567770400 | T | T | T |

|                  |                  |                  |   |   |   |
|------------------|------------------|------------------|---|---|---|
| 0.29216595426500 | 0.19631454226700 | 0.72127069932600 | T | T | T |
| 0.62550010864000 | 0.19631560632900 | 0.05460500442910 | T | T | T |
| 0.62550009495300 | 0.19631528935800 | 0.38793584620700 | T | T | T |
| 0.62550013877300 | 0.19631590056600 | 0.72127087687600 | T | T | T |
| 0.95883439868400 | 0.19631392421800 | 0.05460534255210 | T | T | T |
| 0.95883452476700 | 0.19631334248100 | 0.38793566441600 | T | T | T |
| 0.95883426024900 | 0.19631454106300 | 0.72127069387700 | T | T | T |
| 0.29190561271500 | 0.19635775583100 | 0.27744979775100 | T | T | T |
| 0.29190596740600 | 0.19635949280500 | 0.61078349433200 | T | T | T |
| 0.29190601713500 | 0.19635932587200 | 0.94411818145300 | T | T | T |
| 0.62524031684000 | 0.19635998509000 | 0.27744994860800 | T | T | T |
| 0.62524038406900 | 0.19636124826600 | 0.61078394227500 | T | T | T |
| 0.62524034619900 | 0.19636085693100 | 0.94411800413400 | T | T | T |
| 0.95857468928400 | 0.19635771994000 | 0.27744983377200 | T | T | T |
| 0.95857453457700 | 0.19635946319900 | 0.61078351425800 | T | T | T |
| 0.95857445228000 | 0.19635927698200 | 0.94411824521500 | T | T | T |
| 0.29205469890100 | 0.19613199334500 | 0.16538160928600 | T | T | T |
| 0.29205491758200 | 0.19613295427300 | 0.49871249507500 | T | T | T |
| 0.29205511422500 | 0.19613326142500 | 0.83204763107500 | T | T | T |
| 0.62538927991100 | 0.19613405195200 | 0.16538148637000 | T | T | T |
| 0.62538937569700 | 0.19613485455300 | 0.49871285331900 | T | T | T |
| 0.62538935637700 | 0.19613464502900 | 0.83204759039900 | T | T | T |
| 0.95872362507000 | 0.19613192090500 | 0.16538156419900 | T | T | T |
| 0.95872368125800 | 0.19613288354600 | 0.49871248900400 | T | T | T |
| 0.95872342536200 | 0.19613320034600 | 0.83204765522700 | T | T | T |
| 0.04311628228970 | 0.19647158862600 | 0.05522622671070 | T | T | T |
| 0.04311645898680 | 0.19647094624100 | 0.38855652573000 | T | T | T |
| 0.04311642392910 | 0.19647221538400 | 0.72189146947700 | T | T | T |
| 0.37644796642200 | 0.19647233622200 | 0.05522612404390 | T | T | T |
| 0.37644785738600 | 0.19647182613100 | 0.38855670234000 | T | T | T |

|                  |                  |                  |   |   |   |
|------------------|------------------|------------------|---|---|---|
| 0.37644831325800 | 0.19647281502200 | 0.72189159640600 | T | T | T |
| 0.70978350434100 | 0.19647327766000 | 0.05522590006240 | T | T | T |
| 0.70978366419100 | 0.19647293293100 | 0.38855671176600 | T | T | T |
| 0.70978346388700 | 0.19647358623300 | 0.72189164224200 | T | T | T |
| 0.04140561402390 | 0.19631785048200 | 0.27761675848700 | T | T | T |
| 0.04140569500560 | 0.19631963310100 | 0.61095025403400 | T | T | T |
| 0.04140557645330 | 0.19631949871300 | 0.94428514706600 | T | T | T |
| 0.37473683668200 | 0.19631886060800 | 0.27761692703100 | T | T | T |
| 0.37473734025500 | 0.19632040827900 | 0.61095051921900 | T | T | T |
| 0.37473736540400 | 0.19632019251300 | 0.94428511528500 | T | T | T |
| 0.70807269655200 | 0.19632014596600 | 0.27761690149600 | T | T | T |
| 0.70807268628100 | 0.19632142665200 | 0.61095071256700 | T | T | T |
| 0.70807260955400 | 0.19632107392400 | 0.94428493602900 | T | T | T |
| 0.04150280125550 | 0.19607845079100 | 0.16561795996100 | T | T | T |
| 0.04150285361660 | 0.19607940463300 | 0.49894881471700 | T | T | T |
| 0.04150278800820 | 0.19607982514400 | 0.83228395847500 | T | T | T |
| 0.37483406223100 | 0.19607939323200 | 0.16561776121000 | T | T | T |
| 0.37483425841100 | 0.19608026196600 | 0.49894886865000 | T | T | T |
| 0.37483460720200 | 0.19608044925800 | 0.83228383773900 | T | T | T |
| 0.70816991065600 | 0.19608057102600 | 0.16561780859000 | T | T | T |
| 0.70816993327500 | 0.19608136573200 | 0.49894915616500 | T | T | T |
| 0.70816976669000 | 0.19608123871200 | 0.83228388583900 | T | T | T |
| 0.20573178776300 | 0.19626520297300 | 0.05526674730430 | T | T | T |
| 0.20573166682700 | 0.19626461996900 | 0.38859706217600 | T | T | T |
| 0.20573168494400 | 0.19626585159700 | 0.72193201077100 | T | T | T |
| 0.53906465114100 | 0.19626682927100 | 0.05526646992500 | T | T | T |
| 0.53906451813800 | 0.19626653791100 | 0.38859734757700 | T | T | T |
| 0.53906468390800 | 0.19626718975300 | 0.72193224260700 | T | T | T |
| 0.87240004640900 | 0.19626591141200 | 0.05526670684280 | T | T | T |
| 0.87240013847100 | 0.19626547770000 | 0.38859730574800 | T | T | T |

|                  |                  |                  |   |   |   |
|------------------|------------------|------------------|---|---|---|
| 0.87239966493200 | 0.19626644174600 | 0.72193218483700 | T | T | T |
| 0.20802901228400 | 0.19649943031900 | 0.27767709594800 | T | T | T |
| 0.20802886350000 | 0.19650114006800 | 0.61101057562300 | T | T | T |
| 0.20802892407200 | 0.19650102550100 | 0.94434542812100 | T | T | T |
| 0.54136200616800 | 0.19650176854600 | 0.27767724177200 | T | T | T |
| 0.54136190086100 | 0.19650296273100 | 0.61101100078400 | T | T | T |
| 0.54136199039500 | 0.19650261355700 | 0.94434525550700 | T | T | T |
| 0.87469759179800 | 0.19650033590900 | 0.27767716609500 | T | T | T |
| 0.87469705650100 | 0.19650183035300 | 0.61101076267000 | T | T | T |
| 0.87469704314800 | 0.19650160578700 | 0.94434539032200 | T | T | T |
| 0.20792588630200 | 0.19593390619200 | 0.16582743786100 | T | T | T |
| 0.20792546860200 | 0.19593483919200 | 0.49915820498100 | T | T | T |
| 0.20792554236600 | 0.19593519377900 | 0.83249338420800 | T | T | T |
| 0.54125860501300 | 0.19593595646400 | 0.16582712996800 | T | T | T |
| 0.54125821754500 | 0.19593670619600 | 0.49915843152400 | T | T | T |
| 0.54125846427000 | 0.19593656876500 | 0.83249324307200 | T | T | T |
| 0.87459424236400 | 0.19593468263200 | 0.16582726463900 | T | T | T |
| 0.87459372021800 | 0.19593554609100 | 0.49915830024000 | T | T | T |
| 0.87459343436500 | 0.19593569834900 | 0.83249334325000 | T | T | T |
| 0.00056397274415 | 0.24453557958400 | 0.00915088473857 | T | T | T |
| 0.00056410595264 | 0.24453382298500 | 0.34248188638000 | T | T | T |
| 0.00056399925648 | 0.24453646172000 | 0.67581607474800 | T | T | T |
| 0.33389576628100 | 0.24453617396600 | 0.00915076593236 | T | T | T |
| 0.33389551795800 | 0.24453453569600 | 0.34248188020000 | T | T | T |
| 0.33389588196600 | 0.24453692734400 | 0.67581611551900 | T | T | T |
| 0.66723047668500 | 0.24453813617500 | 0.00915027555650 | T | T | T |
| 0.66723052324100 | 0.24453697985000 | 0.34248163917000 | T | T | T |
| 0.66723047744700 | 0.24453859386100 | 0.67581609415500 | T | T | T |
| 0.33257544353200 | 0.24770165647800 | 0.22592162965000 | T | T | T |
| 0.33257582321700 | 0.24770407391600 | 0.55925384399700 | T | T | T |



|                  |                  |                  |   |   |   |
|------------------|------------------|------------------|---|---|---|
| 0.33257593301000 | 0.24770390176000 | 0.89258872507400 | T | T | T |
| 0.66591050396500 | 0.24770420033800 | 0.22592139312900 | T | T | T |
| 0.66591060775800 | 0.24770617400900 | 0.55925392273800 | T | T | T |
| 0.66591053472400 | 0.24770560086200 | 0.89258846581600 | T | T | T |
| 0.99924414623900 | 0.24770087696400 | 0.22592173088800 | T | T | T |
| 0.99924420179000 | 0.24770346943800 | 0.55925384753300 | T | T | T |
| 0.99924407978800 | 0.24770338004800 | 0.89258884425000 | T | T | T |
| 0.00122019482884 | 0.24435217982300 | 0.11771897439200 | T | T | T |
| 0.00122031021387 | 0.24435315132900 | 0.45104958817500 | T | T | T |
| 0.00122024046389 | 0.24435393940600 | 0.78438458819700 | T | T | T |
| 0.33455179493200 | 0.24435289882300 | 0.11771883312200 | T | T | T |
| 0.33455188423700 | 0.24435382134600 | 0.45104957782100 | T | T | T |
| 0.33455222417500 | 0.24435438952900 | 0.78438453742700 | T | T | T |
| 0.66788668686400 | 0.24435524075500 | 0.11771841123300 | T | T | T |
| 0.66788677096000 | 0.24435614059600 | 0.45104948869300 | T | T | T |
| 0.66788674277900 | 0.24435597746400 | 0.78438438878500 | T | T | T |
| 0.16603950018200 | 0.24473340836200 | 0.00914851814159 | T | T | T |
| 0.16603949916300 | 0.24473168101300 | 0.34247957114600 | T | T | T |
| 0.16603947449400 | 0.24473418176800 | 0.67581378420000 | T | T | T |
| 0.49937220166500 | 0.24473559596800 | 0.00914811141585 | T | T | T |
| 0.49937208090800 | 0.24473449994700 | 0.34247951037200 | T | T | T |
| 0.49937224127700 | 0.24473610785600 | 0.67581389633500 | T | T | T |
| 0.83270735638600 | 0.24473480196200 | 0.00914827726332 | T | T | T |
| 0.83270755179500 | 0.24473353556700 | 0.34247954788200 | T | T | T |
| 0.83270718489200 | 0.24473542681000 | 0.67581388046200 | T | T | T |
| 0.16540893539100 | 0.24850981080100 | 0.22559142891600 | T | T | T |
| 0.16540883070500 | 0.24851220539700 | 0.55892350910800 | T | T | T |
| 0.16540887515000 | 0.24851228678800 | 0.89225841358400 | T | T | T |
| 0.49874157854800 | 0.24851261333100 | 0.22559103106200 | T | T | T |
| 0.49874155678800 | 0.24851445814400 | 0.55892352410100 | T | T | T |

|                  |                  |                  |   |   |   |
|------------------|------------------|------------------|---|---|---|
| 0.49874169018400 | 0.24851414775000 | 0.89225805882500 | T | T | T |
| 0.83207695874300 | 0.24851162892500 | 0.22559116051200 | T | T | T |
| 0.83207667400400 | 0.24851366540100 | 0.55892353200600 | T | T | T |
| 0.83207655528500 | 0.24851346311400 | 0.89225820021200 | T | T | T |
| 0.16318320636200 | 0.27980952179400 | 0.10103910187600 | T | T | T |
| 0.16318313294100 | 0.27980999653300 | 0.43436982193700 | T | T | T |
| 0.16318315500400 | 0.27981130917500 | 0.76770473444700 | T | T | T |
| 0.49651569369600 | 0.27981202874600 | 0.10103875085100 | T | T | T |
| 0.49651558540500 | 0.27981259472600 | 0.43436997986900 | T | T | T |
| 0.49651584664600 | 0.27981309221600 | 0.76770472305800 | T | T | T |
| 0.82985139282900 | 0.27981116517800 | 0.10103891041200 | T | T | T |
| 0.82985133985300 | 0.27981173575800 | 0.43436999162400 | T | T | T |
| 0.82985096529600 | 0.27981248769300 | 0.76770477758200 | T | T | T |
| 0.08350569088810 | 0.24457788936500 | 0.00900481582083 | T | T | T |
| 0.08350574294710 | 0.24457637074200 | 0.34233583340600 | T | T | T |
| 0.08350577103690 | 0.24457868228600 | 0.67567001363300 | T | T | T |
| 0.41683792623200 | 0.24457938568300 | 0.00900452974489 | T | T | T |
| 0.41683771129500 | 0.24457828578900 | 0.34233582076700 | T | T | T |
| 0.41683805662500 | 0.24457997808000 | 0.67567011116700 | T | T | T |
| 0.75017308023800 | 0.24457996582700 | 0.00900433291567 | T | T | T |
| 0.75017320077600 | 0.24457900464600 | 0.34233569203500 | T | T | T |
| 0.75017302644000 | 0.24458045742500 | 0.67567009094000 | T | T | T |
| 0.08297745101450 | 0.24420598364000 | 0.22811859575900 | T | T | T |
| 0.08297758259850 | 0.24420859973100 | 0.56145068436300 | T | T | T |
| 0.08297755382870 | 0.24420840740300 | 0.89478578533800 | T | T | T |
| 0.41630938241200 | 0.24420819980500 | 0.22811832368000 | T | T | T |
| 0.41630971576900 | 0.24421033804600 | 0.56145069463100 | T | T | T |
| 0.41630985031100 | 0.24420983338700 | 0.89478553741100 | T | T | T |
| 0.74964494354600 | 0.24420899823200 | 0.22811828404800 | T | T | T |
| 0.74964495811800 | 0.24421103101500 | 0.56145076015200 | T | T | T |

|                  |                  |                  |   |   |   |
|------------------|------------------|------------------|---|---|---|
| 0.74964484680600 | 0.24421034474000 | 0.89478547258700 | T | T | T |
| 0.08514390302030 | 0.24813306265300 | 0.12147167353800 | T | T | T |
| 0.08514407239280 | 0.24813401647100 | 0.45480224839800 | T | T | T |
| 0.08514407765560 | 0.24813484699000 | 0.78813729624300 | T | T | T |
| 0.41847603738700 | 0.24813491854100 | 0.12147118955800 | T | T | T |
| 0.41847616983100 | 0.24813579710100 | 0.45480216608100 | T | T | T |
| 0.41847646116200 | 0.24813607247200 | 0.78813711130000 | T | T | T |
| 0.75181148310600 | 0.24813559203700 | 0.12147114350900 | T | T | T |
| 0.75181161613100 | 0.24813648427700 | 0.45480220658700 | T | T | T |
| 0.75181137893300 | 0.24813650877200 | 0.78813713194400 | T | T | T |
| 0.24983001712700 | 0.24454803771100 | 0.00893943363200 | T | T | T |
| 0.24982989877600 | 0.24454643984700 | 0.34227044168700 | T | T | T |
| 0.24983000620200 | 0.24454882828500 | 0.67560466863300 | T | T | T |
| 0.58316359335100 | 0.24455052468700 | 0.00893885860073 | T | T | T |
| 0.58316356881700 | 0.24454957961300 | 0.34227023430600 | T | T | T |
| 0.58316360302600 | 0.24455099427000 | 0.67560471003700 | T | T | T |
| 0.91649811239700 | 0.24454853836300 | 0.00893935147172 | T | T | T |
| 0.91649830816100 | 0.24454716639200 | 0.34227042259100 | T | T | T |
| 0.91649798574100 | 0.24454932995800 | 0.67560468981800 | T | T | T |
| 0.24959716713500 | 0.24475301722700 | 0.22841145360700 | T | T | T |
| 0.24959711197800 | 0.24475569456900 | 0.56174358321500 | T | T | T |
| 0.24959717909400 | 0.24475545294900 | 0.89507866964300 | T | T | T |
| 0.58293085382200 | 0.24475638800700 | 0.22841107384200 | T | T | T |
| 0.58293071716900 | 0.24475842409000 | 0.56174364706300 | T | T | T |
| 0.58293076684600 | 0.24475767798200 | 0.89507830336100 | T | T | T |
| 0.91626565334400 | 0.24475376874700 | 0.22841130472600 | T | T | T |
| 0.91626531387400 | 0.24475627561300 | 0.56174356281900 | T | T | T |
| 0.91626518511000 | 0.24475590958200 | 0.89507859836600 | T | T | T |
| 0.25418731606700 | 0.24435101193600 | 0.11570969496500 | T | T | T |
| 0.25418718021200 | 0.24435193126900 | 0.44904023135100 | T | T | T |

|                  |                  |                  |   |   |   |
|------------------|------------------|------------------|---|---|---|
| 0.25418729550200 | 0.24435250529500 | 0.78237537304800 | T | T | T |
| 0.58752094091500 | 0.24435395912700 | 0.11570907448600 | T | T | T |
| 0.58752080244900 | 0.24435482310100 | 0.44904010948700 | T | T | T |
| 0.58752088285100 | 0.24435449964700 | 0.78237516912200 | T | T | T |
| 0.92085562588800 | 0.24435154292900 | 0.11570948181200 | T | T | T |
| 0.92085551476100 | 0.24435248384600 | 0.44904014304900 | T | T | T |
| 0.92085522425800 | 0.24435288580700 | 0.78237529305700 | T | T | T |
| 0.12503464626600 | 0.99481638688700 | 0.03181978998470 | T | T | T |
| 0.12503468348800 | 0.99481697880900 | 0.36515204490000 | T | T | T |
| 0.12503465822600 | 0.99481575569500 | 0.69848611373200 | T | T | T |
| 0.45836745592400 | 0.99481536332900 | 0.03181981235820 | T | T | T |
| 0.45836735241800 | 0.99481570123600 | 0.36515231612500 | T | T | T |
| 0.45836750355900 | 0.99481489097500 | 0.69848634729600 | T | T | T |
| 0.79170189446700 | 0.99481543220400 | 0.03181978779840 | T | T | T |
| 0.79170201343600 | 0.99481577416800 | 0.36515227172600 | T | T | T |
| 0.79170180268500 | 0.99481494715900 | 0.69848632807600 | T | T | T |
| 0.12280870465900 | 0.99842699192700 | 0.25179899152300 | T | T | T |
| 0.12280885329500 | 0.99842549623600 | 0.58513230495100 | T | T | T |
| 0.12280884510500 | 0.99842561235700 | 0.91846621641900 | T | T | T |
| 0.45614145109200 | 0.99842565616000 | 0.25179908452000 | T | T | T |
| 0.45614168904000 | 0.99842446450000 | 0.58513252188200 | T | T | T |
| 0.45614175874100 | 0.99842472804100 | 0.91846621136400 | T | T | T |
| 0.78947617279100 | 0.99842570017300 | 0.25179909864600 | T | T | T |
| 0.78947618018900 | 0.99842448130500 | 0.58513254097800 | T | T | T |
| 0.78947606721900 | 0.99842477094400 | 0.91846622309500 | T | T | T |
| 0.12654526580500 | 0.99460248639800 | 0.14276712246100 | T | T | T |
| 0.12654539998900 | 0.99460177157200 | 0.47609945996700 | T | T | T |
| 0.12654549784900 | 0.99460137853700 | 0.80943352153800 | T | T | T |
| 0.45987822270000 | 0.99460132650500 | 0.14276692234100 | T | T | T |
| 0.45987836021200 | 0.99460069564600 | 0.47609949347800 | T | T | T |

|                  |                  |                  |   |   |   |
|------------------|------------------|------------------|---|---|---|
| 0.45987854813900 | 0.99460061129800 | 0.80943345882400 | T | T | T |
| 0.79321278065500 | 0.99460130842200 | 0.14276701685700 | T | T | T |
| 0.79321289393200 | 0.99460064519400 | 0.47609957532200 | T | T | T |
| 0.79321276226000 | 0.99460060790800 | 0.80943352972100 | T | T | T |
| 0.29159462216000 | 0.99466972684400 | 0.03052481278810 | T | T | T |
| 0.29159451890000 | 0.99467030389000 | 0.36385706422800 | T | T | T |
| 0.29159465318500 | 0.99466908444100 | 0.69719113912400 | T | T | T |
| 0.62492840753400 | 0.99466841232700 | 0.03052476578450 | T | T | T |
| 0.62492841129400 | 0.99466870003800 | 0.36385727960700 | T | T | T |
| 0.62492840116900 | 0.99466798703300 | 0.69719136307900 | T | T | T |
| 0.95826216657300 | 0.99466975027500 | 0.03052482009060 | T | T | T |
| 0.95826227947900 | 0.99467029453700 | 0.36385706785600 | T | T | T |
| 0.95826211468900 | 0.99466906454200 | 0.69719114790600 | T | T | T |
| 0.29084754149800 | 0.99642437966300 | 0.25085310134700 | T | T | T |
| 0.29084785063300 | 0.99642274082700 | 0.58418653135300 | T | T | T |
| 0.29084789064700 | 0.99642291772500 | 0.91752037319300 | T | T | T |
| 0.62418165894400 | 0.99642269576200 | 0.25085326785400 | T | T | T |
| 0.62418180816300 | 0.99642139768200 | 0.58418684080900 | T | T | T |
| 0.62418176212800 | 0.99642178691700 | 0.91752040556000 | T | T | T |
| 0.95751542456000 | 0.99642434835400 | 0.25085309394400 | T | T | T |
| 0.95751550716700 | 0.99642271034300 | 0.58418652612800 | T | T | T |
| 0.95751540620300 | 0.99642291105100 | 0.91752038748100 | T | T | T |
| 0.29321478953600 | 0.99602443861900 | 0.14084177077700 | T | T | T |
| 0.29321480412500 | 0.99602361765600 | 0.47417416174100 | T | T | T |
| 0.29321494563700 | 0.99602324288100 | 0.80750828598200 | T | T | T |
| 0.62654870038700 | 0.99602288037600 | 0.14084171099600 | T | T | T |
| 0.62654869555900 | 0.99602210363200 | 0.47417436078100 | T | T | T |
| 0.62654870236800 | 0.99602218886600 | 0.80750834898100 | T | T | T |
| 0.95988249305400 | 0.99602444170600 | 0.14084175493200 | T | T | T |
| 0.95988249741000 | 0.99602360245900 | 0.47417415418000 | T | T | T |

|                  |                  |                  |   |   |   |
|------------------|------------------|------------------|---|---|---|
| 0.95988237306400 | 0.99602322539800 | 0.80750829641700 | T | T | T |
| 0.04203197074960 | 0.99471265852700 | 0.03163935727320 | T | T | T |
| 0.04203202443810 | 0.99471325192700 | 0.36497157701800 | T | T | T |
| 0.04203201203740 | 0.99471197340600 | 0.69830566736200 | T | T | T |
| 0.37536454084700 | 0.99471205677200 | 0.03163935266100 | T | T | T |
| 0.37536439204000 | 0.99471251845600 | 0.36497171776400 | T | T | T |
| 0.37536463290900 | 0.99471148616200 | 0.69830578546400 | T | T | T |
| 0.70869887339900 | 0.99471131648200 | 0.03163932339830 | T | T | T |
| 0.70869894099000 | 0.99471161875800 | 0.36497182990600 | T | T | T |
| 0.70869884901700 | 0.99471087622000 | 0.69830591551000 | T | T | T |
| 0.04002649823520 | 0.99673871503100 | 0.25108662866500 | T | T | T |
| 0.04002641225410 | 0.99673711312100 | 0.58442001844300 | T | T | T |
| 0.04002635459760 | 0.99673726232000 | 0.91775392963000 | T | T | T |
| 0.37335872118000 | 0.99673790069900 | 0.25108673699100 | T | T | T |
| 0.37335883258500 | 0.99673648928100 | 0.58442018329000 | T | T | T |
| 0.37335891686000 | 0.99673672527300 | 0.91775395740400 | T | T | T |
| 0.70669331268900 | 0.99673701059700 | 0.25108681525200 | T | T | T |
| 0.70669319669400 | 0.99673576446000 | 0.58442035942500 | T | T | T |
| 0.70669314744400 | 0.99673613266800 | 0.91775395942900 | T | T | T |
| 0.04127836524790 | 0.99567113345500 | 0.14193394472600 | T | T | T |
| 0.04127845237630 | 0.99567033761700 | 0.47526630691800 | T | T | T |
| 0.04127842504130 | 0.99566992947900 | 0.80860040975300 | T | T | T |
| 0.37461082181400 | 0.99567041630200 | 0.14193386046100 | T | T | T |
| 0.37461091618000 | 0.99566967825300 | 0.47526635511800 | T | T | T |
| 0.37461111040600 | 0.99566946578800 | 0.80860038614100 | T | T | T |
| 0.70794531446100 | 0.99566955347400 | 0.14193386075800 | T | T | T |
| 0.70794538262700 | 0.99566882027900 | 0.47526649199400 | T | T | T |
| 0.70794528920900 | 0.99566888786200 | 0.80860044377400 | T | T | T |
| 0.20849693051600 | 0.99499380835400 | 0.03087797375230 | T | T | T |
| 0.20849687246000 | 0.99499441102700 | 0.36421021385400 | T | T | T |

|                  |                  |                  |   |   |   |
|------------------|------------------|------------------|---|---|---|
| 0.20849693934100 | 0.99499317469000 | 0.69754428615200 | T | T | T |
| 0.54183014440500 | 0.99499250219800 | 0.03087796494060 | T | T | T |
| 0.54183006563500 | 0.99499279072600 | 0.36421050222300 | T | T | T |
| 0.54183016489000 | 0.99499206679300 | 0.69754455513700 | T | T | T |
| 0.87516437822300 | 0.99499327679500 | 0.03087799398300 | T | T | T |
| 0.87516448486400 | 0.99499370860600 | 0.36421036093900 | T | T | T |
| 0.87516428420700 | 0.99499269481500 | 0.69754442130600 | T | T | T |
| 0.20564503006000 | 0.99611665555700 | 0.25155208142400 | T | T | T |
| 0.20564469061900 | 0.99611509495200 | 0.58488544230500 | T | T | T |
| 0.20564475898400 | 0.99611524070200 | 0.91821933116700 | T | T | T |
| 0.53897793874000 | 0.99611493155800 | 0.25155222856000 | T | T | T |
| 0.53897765665100 | 0.99611374135900 | 0.58488573886600 | T | T | T |
| 0.53897781860500 | 0.99611410315600 | 0.91821935086000 | T | T | T |
| 0.87231258332900 | 0.99611594427300 | 0.25155209802800 | T | T | T |
| 0.87231208461400 | 0.99611454215100 | 0.58488553914700 | T | T | T |
| 0.87231206256100 | 0.99611478999000 | 0.91821932343200 | T | T | T |
| 0.20888280026600 | 0.00580346891817 | 0.13534032555100 | T | T | T |
| 0.20888259807600 | 0.00580309284013 | 0.46867256828500 | T | T | T |
| 0.20888251215100 | 0.00580293856485 | 0.80200654714000 | T | T | T |
| 0.54221571445500 | 0.00580247184866 | 0.13533999300300 | T | T | T |
| 0.54221549865600 | 0.00580214862294 | 0.46867252343900 | T | T | T |
| 0.54221554623600 | 0.00580230906799 | 0.80200641393600 | T | T | T |
| 0.87555016792200 | 0.00580310076937 | 0.13534013289100 | T | T | T |
| 0.87554994594300 | 0.00580273565968 | 0.46867250877700 | T | T | T |
| 0.87554968096700 | 0.00580269331135 | 0.80200647258000 | T | T | T |
| 0.00041843299779 | 0.06718676640960 | 0.08206872867670 | T | T | T |
| 0.00041850964793 | 0.06718670889890 | 0.41540075123600 | T | T | T |
| 0.00041842008045 | 0.06718654775340 | 0.74873478391100 | T | T | T |
| 0.33375079692200 | 0.06718665760550 | 0.08206864570020 | T | T | T |
| 0.33375074906800 | 0.06718659408400 | 0.41540074673600 | T | T | T |

|                  |                  |                  |   |   |   |
|------------------|------------------|------------------|---|---|---|
| 0.33375096734800 | 0.06718649080450 | 0.74873476147100 | T | T | T |
| 0.66708502252100 | 0.06718627208110 | 0.08206839306590 | T | T | T |
| 0.66708506169100 | 0.06718614036560 | 0.41540072092000 | T | T | T |
| 0.66708500484700 | 0.06718621990450 | 0.74873473541300 | T | T | T |
| 0.33307496087700 | 0.06568298230310 | 0.30534165440900 | T | T | T |
| 0.33307519123100 | 0.06568241384710 | 0.63867529561900 | T | T | T |
| 0.33307520773400 | 0.06568259502430 | 0.97200910346400 | T | T | T |
| 0.66640940309600 | 0.06568252393150 | 0.30534168869500 | T | T | T |
| 0.66640936699900 | 0.06568207970110 | 0.63867546139300 | T | T | T |
| 0.66640935333000 | 0.06568227117700 | 0.97200895750000 | T | T | T |
| 0.99974288683300 | 0.06568313439020 | 0.30534161351500 | T | T | T |
| 0.99974281895400 | 0.06568251123050 | 0.63867523092100 | T | T | T |
| 0.99974277677400 | 0.06568269948710 | 0.97200913749200 | T | T | T |
| 0.33311993262400 | 0.06874290463990 | 0.19303331375800 | T | T | T |
| 0.33312011495600 | 0.06874252489960 | 0.52636581325100 | T | T | T |
| 0.33312025018600 | 0.06874266925570 | 0.85969976355500 | T | T | T |
| 0.66645438525000 | 0.06874257294460 | 0.19303314726200 | T | T | T |
| 0.66645443058100 | 0.06874219838600 | 0.52636586537700 | T | T | T |
| 0.66645436088100 | 0.06874246233450 | 0.85969965549600 | T | T | T |
| 0.99978782569800 | 0.06874303320950 | 0.19303337143300 | T | T | T |
| 0.99978787115600 | 0.06874262473860 | 0.52636580795600 | T | T | T |
| 0.99978776543600 | 0.06874273298080 | 0.85969982345900 | T | T | T |
| 0.16702549041700 | 0.06319760186310 | 0.08558618323140 | T | T | T |
| 0.16702546696200 | 0.06319751787370 | 0.41891826018100 | T | T | T |
| 0.16702548016100 | 0.06319718235850 | 0.75225249757000 | T | T | T |
| 0.50035839453300 | 0.06319697155660 | 0.08558613433550 | T | T | T |
| 0.50035831675400 | 0.06319682636430 | 0.41891853265600 | T | T | T |
| 0.50035847190700 | 0.06319672727130 | 0.75225266608600 | T | T | T |
| 0.83369295665500 | 0.06319717987500 | 0.08558615516400 | T | T | T |
| 0.83369298731300 | 0.06319704160410 | 0.41891844766600 | T | T | T |



|                  |                  |                   |   |   |   |
|------------------|------------------|-------------------|---|---|---|
| 0.83369274423800 | 0.06319686658100 | 0.75225262251800  | T | T | T |
| 0.16641356366900 | 0.06570227048160 | 0.30556095225800  | T | T | T |
| 0.16641352289900 | 0.06570165424180 | 0.63889450373600  | T | T | T |
| 0.16641353732200 | 0.06570182506810 | 0.97222841758300  | T | T | T |
| 0.49974638014000 | 0.06570166134990 | 0.30556104774200  | T | T | T |
| 0.49974644536100 | 0.06570122164170 | 0.638894711171400 | T | T | T |
| 0.49974649988000 | 0.06570141666620 | 0.97222829700400  | T | T | T |
| 0.83308113369300 | 0.06570186887620 | 0.30556099886200  | T | T | T |
| 0.83308087743400 | 0.06570136571790 | 0.63889463878300  | T | T | T |
| 0.83308088653700 | 0.06570156422150 | 0.97222833494400  | T | T | T |
| 0.16576679312900 | 0.06802676361010 | 0.19351288267200  | T | T | T |
| 0.16576671490000 | 0.06802637661780 | 0.52684534114100  | T | T | T |
| 0.16576675051400 | 0.06802641272710 | 0.86017933718600  | T | T | T |
| 0.49909962002700 | 0.06802629962040 | 0.19351264016700  | T | T | T |
| 0.49909957072500 | 0.06802595961740 | 0.52684536446400  | T | T | T |
| 0.49909973425100 | 0.06802612908030 | 0.86017917980500  | T | T | T |
| 0.83243435297500 | 0.06802645078590 | 0.19351270061100  | T | T | T |
| 0.83243417482600 | 0.06802608336410 | 0.52684534839200  | T | T | T |
| 0.83243402397800 | 0.06802621712460 | 0.86017923339300  | T | T | T |
| 0.08438343901630 | 0.06529680232400 | 0.08401039724740  | T | T | T |
| 0.08438350344490 | 0.06529677941430 | 0.41734245673900  | T | T | T |
| 0.08438352441320 | 0.06529650153530 | 0.75067651380400  | T | T | T |
| 0.41771608797100 | 0.06529645214800 | 0.08401021381190  | T | T | T |
| 0.41771605790800 | 0.06529637673080 | 0.41734249578200  | T | T | T |
| 0.41771629472700 | 0.06529625155910 | 0.75067651185000  | T | T | T |
| 0.75105067393000 | 0.06529632119210 | 0.08401015316880  | T | T | T |
| 0.75105075488700 | 0.06529621942490 | 0.41734249910300  | T | T | T |
| 0.75105059602000 | 0.06529615655930 | 0.75067652533500  | T | T | T |
| 0.08313625855350 | 0.06571112640530 | 0.30539562205200  | T | T | T |
| 0.08313630461560 | 0.06571058559500 | 0.63872922985200  | T | T | T |

|                  |                  |                  |   |   |   |
|------------------|------------------|------------------|---|---|---|
| 0.08313626490820 | 0.06571073561890 | 0.97206315698300 | T | T | T |
| 0.41646868441800 | 0.06571070276250 | 0.30539572986100 | T | T | T |
| 0.41646893436600 | 0.06571028995350 | 0.63872939941200 | T | T | T |
| 0.41646894063400 | 0.06571045395310 | 0.97206309478200 | T | T | T |
| 0.74980348268400 | 0.06571059032350 | 0.30539573428100 | T | T | T |
| 0.74980339353700 | 0.06571020151640 | 0.63872946348500 | T | T | T |
| 0.74980337202900 | 0.06571037062670 | 0.97206303508100 | T | T | T |
| 0.08342327148470 | 0.06823215709140 | 0.19283582653500 | T | T | T |
| 0.08342342549680 | 0.06823183069220 | 0.52616809950700 | T | T | T |
| 0.08342340495370 | 0.06823187928970 | 0.85950210137900 | T | T | T |
| 0.41675583206300 | 0.06823181697560 | 0.19283554454300 | T | T | T |
| 0.41675605914800 | 0.06823154094830 | 0.52616802341800 | T | T | T |
| 0.41675619105700 | 0.06823168578060 | 0.85950190841100 | T | T | T |
| 0.75009057040800 | 0.06823174392870 | 0.19283549771800 | T | T | T |
| 0.75009065906700 | 0.06823144812150 | 0.52616805060300 | T | T | T |
| 0.75009050811600 | 0.06823163690510 | 0.85950188626900 | T | T | T |
| 0.25033576233600 | 0.06859925719850 | 0.08099975586210 | T | T | T |
| 0.25033568758800 | 0.06859921624320 | 0.41433178979500 | T | T | T |
| 0.25033573708600 | 0.06859910153660 | 0.74766576211000 | T | T | T |
| 0.58366917613600 | 0.06859882705860 | 0.08099939042750 | T | T | T |
| 0.58366911447700 | 0.06859869541180 | 0.41433173966400 | T | T | T |
| 0.58366914653500 | 0.06859879836630 | 0.74766570584400 | T | T | T |
| 0.91700335441600 | 0.06859913051220 | 0.08099967433730 | T | T | T |
| 0.91700338192400 | 0.06859904762270 | 0.41433178604500 | T | T | T |
| 0.91700312830200 | 0.06859898309750 | 0.74766575983400 | T | T | T |
| 0.25019011999400 | 0.06602394400230 | 0.30450490272300 | T | T | T |
| 0.25019018350800 | 0.06602346131390 | 0.63783858429900 | T | T | T |
| 0.25019020715600 | 0.06602360511510 | 0.97117246337500 | T | T | T |
| 0.58352368159500 | 0.06602337688560 | 0.30450505335400 | T | T | T |
| 0.58352368010600 | 0.06602305583120 | 0.63783885705300 | T | T | T |

|                  |                  |                  |   |   |   |
|------------------|------------------|------------------|---|---|---|
| 0.58352370404400 | 0.06602321297780 | 0.97117234728400 | T | T | T |
| 0.91685794776000 | 0.06602379433780 | 0.30450493514900 | T | T | T |
| 0.91685772913300 | 0.06602334794540 | 0.63783864147200 | T | T | T |
| 0.91685772906400 | 0.06602351350020 | 0.97117245670800 | T | T | T |
| 0.25010305831200 | 0.06641662457000 | 0.19392311971400 | T | T | T |
| 0.25010303119300 | 0.06641629316020 | 0.52725537116000 | T | T | T |
| 0.25010312580800 | 0.06641635108300 | 0.86058940072400 | T | T | T |
| 0.58343655452900 | 0.06641613756680 | 0.19392271318900 | T | T | T |
| 0.58343648535500 | 0.06641584175710 | 0.52725528835100 | T | T | T |
| 0.58343658704900 | 0.06641604643360 | 0.86058914719100 | T | T | T |
| 0.91677081037000 | 0.06641650252740 | 0.19392298674000 | T | T | T |
| 0.91677066244600 | 0.06641617225540 | 0.52725533228700 | T | T | T |
| 0.91677054917200 | 0.06641626552460 | 0.86058934420400 | T | T | T |
| 0.04166666667330 | 0.13043999673400 | 0.02777666599470 | F | F | F |
| 0.04166666667330 | 0.13043999673400 | 0.36110999932900 | F | F | F |
| 0.04166666667330 | 0.13043999673400 | 0.69444333266100 | F | F | F |
| 0.37500000000700 | 0.13043999673400 | 0.02777666599470 | F | F | F |
| 0.37500000000700 | 0.13043999673400 | 0.36110999932900 | F | F | F |
| 0.37500000000700 | 0.13043999673400 | 0.69444333266100 | F | F | F |
| 0.70833333334100 | 0.13043999673400 | 0.02777666599470 | F | F | F |
| 0.70833333334100 | 0.13043999673400 | 0.36110999932900 | F | F | F |
| 0.70833333334100 | 0.13043999673400 | 0.69444333266100 | F | F | F |
| 0.04166666667330 | 0.13043999673400 | 0.2499999994900  | F | F | F |
| 0.04166666667330 | 0.13043999673400 | 0.58333333328300 | F | F | F |
| 0.04166666667330 | 0.13043999673400 | 0.91666666661700 | F | F | F |
| 0.37500000000700 | 0.13043999673400 | 0.2499999994900  | F | F | F |
| 0.37500000000700 | 0.13043999673400 | 0.58333333328300 | F | F | F |
| 0.37500000000700 | 0.13043999673400 | 0.91666666661700 | F | F | F |
| 0.70833333334100 | 0.13043999673400 | 0.2499999994900  | F | F | F |
| 0.70833333334100 | 0.13043999673400 | 0.58333333328300 | F | F | F |

|                  |                  |                  |   |   |   |
|------------------|------------------|------------------|---|---|---|
| 0.70833333334100 | 0.13043999673400 | 0.91666666661700 | F | F | F |
| 0.04166666667330 | 0.13043999673400 | 0.13888999819000 | F | F | F |
| 0.04166666667330 | 0.13043999673400 | 0.47222333152400 | F | F | F |
| 0.04166666667330 | 0.13043999673400 | 0.80555666485600 | F | F | F |
| 0.37500000000700 | 0.13043999673400 | 0.13888999819000 | F | F | F |
| 0.37500000000700 | 0.13043999673400 | 0.47222333152400 | F | F | F |
| 0.37500000000700 | 0.13043999673400 | 0.80555666485600 | F | F | F |
| 0.70833333334100 | 0.13043999673400 | 0.13888999819000 | F | F | F |
| 0.70833333334100 | 0.13043999673400 | 0.47222333152400 | F | F | F |
| 0.70833333334100 | 0.13043999673400 | 0.80555666485600 | F | F | F |
| 0.20833333332800 | 0.13043999673400 | 0.02777666599470 | F | F | F |
| 0.20833333332800 | 0.13043999673400 | 0.36110999932900 | F | F | F |
| 0.20833333332800 | 0.13043999673400 | 0.69444333266100 | F | F | F |
| 0.54166666666100 | 0.13043999673400 | 0.02777666599470 | F | F | F |
| 0.54166666666100 | 0.13043999673400 | 0.36110999932900 | F | F | F |
| 0.54166666666100 | 0.13043999673400 | 0.69444333266100 | F | F | F |
| 0.8749999999500  | 0.13043999673400 | 0.02777666599470 | F | F | F |
| 0.8749999999500  | 0.13043999673400 | 0.36110999932900 | F | F | F |
| 0.8749999999500  | 0.13043999673400 | 0.69444333266100 | F | F | F |
| 0.20833333332800 | 0.13043999673400 | 0.2499999994900  | F | F | F |
| 0.20833333332800 | 0.13043999673400 | 0.5833333328300  | F | F | F |
| 0.20833333332800 | 0.13043999673400 | 0.91666666661700 | F | F | F |
| 0.54166666666100 | 0.13043999673400 | 0.2499999994900  | F | F | F |
| 0.54166666666100 | 0.13043999673400 | 0.5833333328300  | F | F | F |
| 0.54166666666100 | 0.13043999673400 | 0.91666666661700 | F | F | F |
| 0.8749999999500  | 0.13043999673400 | 0.2499999994900  | F | F | F |
| 0.8749999999500  | 0.13043999673400 | 0.5833333328300  | F | F | F |
| 0.8749999999500  | 0.13043999673400 | 0.91666666661700 | F | F | F |
| 0.20833333332800 | 0.13043999673400 | 0.13888999819000 | F | F | F |
| 0.20833333332800 | 0.13043999673400 | 0.47222333152400 | F | F | F |

|                  |                  |                  |   |   |   |
|------------------|------------------|------------------|---|---|---|
| 0.20833333332800 | 0.13043999673400 | 0.80555666485600 | F | F | F |
| 0.54166666666100 | 0.13043999673400 | 0.13888999819000 | F | F | F |
| 0.54166666666100 | 0.13043999673400 | 0.47222333152400 | F | F | F |
| 0.54166666666100 | 0.13043999673400 | 0.80555666485600 | F | F | F |
| 0.87499999999500 | 0.13043999673400 | 0.13888999819000 | F | F | F |
| 0.87499999999500 | 0.13043999673400 | 0.47222333152400 | F | F | F |
| 0.87499999999500 | 0.13043999673400 | 0.80555666485600 | F | F | F |
| 0.12500000000200 | 0.13043999673400 | 0.02777666599470 | F | F | F |
| 0.12500000000200 | 0.13043999673400 | 0.36110999932900 | F | F | F |
| 0.12500000000200 | 0.13043999673400 | 0.69444333266100 | F | F | F |
| 0.45833333333400 | 0.13043999673400 | 0.02777666599470 | F | F | F |
| 0.45833333333400 | 0.13043999673400 | 0.36110999932900 | F | F | F |
| 0.45833333333400 | 0.13043999673400 | 0.69444333266100 | F | F | F |
| 0.79166666666800 | 0.13043999673400 | 0.02777666599470 | F | F | F |
| 0.79166666666800 | 0.13043999673400 | 0.36110999932900 | F | F | F |
| 0.79166666666800 | 0.13043999673400 | 0.69444333266100 | F | F | F |
| 0.12500000000200 | 0.13043999673400 | 0.24999999949000 | F | F | F |
| 0.12500000000200 | 0.13043999673400 | 0.58333333283000 | F | F | F |
| 0.12500000000200 | 0.13043999673400 | 0.91666666617000 | F | F | F |
| 0.45833333333400 | 0.13043999673400 | 0.24999999949000 | F | F | F |
| 0.45833333333400 | 0.13043999673400 | 0.58333333283000 | F | F | F |
| 0.45833333333400 | 0.13043999673400 | 0.91666666617000 | F | F | F |
| 0.79166666666800 | 0.13043999673400 | 0.24999999949000 | F | F | F |
| 0.79166666666800 | 0.13043999673400 | 0.58333333283000 | F | F | F |
| 0.79166666666800 | 0.13043999673400 | 0.91666666617000 | F | F | F |
| 0.12500000000200 | 0.13043999673400 | 0.13888999819000 | F | F | F |
| 0.12500000000200 | 0.13043999673400 | 0.47222333152400 | F | F | F |
| 0.12500000000200 | 0.13043999673400 | 0.80555666485600 | F | F | F |
| 0.45833333333400 | 0.13043999673400 | 0.13888999819000 | F | F | F |
| 0.45833333333400 | 0.13043999673400 | 0.47222333152400 | F | F | F |

|                  |                  |                  |   |   |   |
|------------------|------------------|------------------|---|---|---|
| 0.45833333333400 | 0.13043999673400 | 0.80555666485600 | F | F | F |
| 0.79166666666800 | 0.13043999673400 | 0.13888999819000 | F | F | F |
| 0.79166666666800 | 0.13043999673400 | 0.47222333152400 | F | F | F |
| 0.79166666666800 | 0.13043999673400 | 0.80555666485600 | F | F | F |
| 0.29166666669900 | 0.13043999673400 | 0.02777666599470 | F | F | F |
| 0.29166666669900 | 0.13043999673400 | 0.36110999932900 | F | F | F |
| 0.29166666669900 | 0.13043999673400 | 0.69444333266100 | F | F | F |
| 0.6250000003100  | 0.13043999673400 | 0.02777666599470 | F | F | F |
| 0.6250000003100  | 0.13043999673400 | 0.36110999932900 | F | F | F |
| 0.6250000003100  | 0.13043999673400 | 0.69444333266100 | F | F | F |
| 0.95833333336500 | 0.13043999673400 | 0.02777666599470 | F | F | F |
| 0.95833333336500 | 0.13043999673400 | 0.36110999932900 | F | F | F |
| 0.95833333336500 | 0.13043999673400 | 0.69444333266100 | F | F | F |
| 0.29166666669900 | 0.13043999673400 | 0.2499999994900  | F | F | F |
| 0.29166666669900 | 0.13043999673400 | 0.5833333328300  | F | F | F |
| 0.29166666669900 | 0.13043999673400 | 0.9166666661700  | F | F | F |
| 0.6250000003100  | 0.13043999673400 | 0.2499999994900  | F | F | F |
| 0.6250000003100  | 0.13043999673400 | 0.5833333328300  | F | F | F |
| 0.6250000003100  | 0.13043999673400 | 0.9166666661700  | F | F | F |
| 0.95833333336500 | 0.13043999673400 | 0.2499999994900  | F | F | F |
| 0.95833333336500 | 0.13043999673400 | 0.5833333328300  | F | F | F |
| 0.95833333336500 | 0.13043999673400 | 0.9166666661700  | F | F | F |
| 0.29166666669900 | 0.13043999673400 | 0.13888999819000 | F | F | F |
| 0.29166666669900 | 0.13043999673400 | 0.47222333152400 | F | F | F |
| 0.29166666669900 | 0.13043999673400 | 0.80555666485600 | F | F | F |
| 0.6250000003100  | 0.13043999673400 | 0.13888999819000 | F | F | F |
| 0.6250000003100  | 0.13043999673400 | 0.47222333152400 | F | F | F |
| 0.6250000003100  | 0.13043999673400 | 0.80555666485600 | F | F | F |
| 0.95833333336500 | 0.13043999673400 | 0.13888999819000 | F | F | F |
| 0.95833333336500 | 0.13043999673400 | 0.47222333152400 | F | F | F |

|                  |                  |                  |   |   |   |
|------------------|------------------|------------------|---|---|---|
| 0.95833333336500 | 0.13043999673400 | 0.80555666485600 | F | F | F |
| 0.00058468008821 | 0.19372226928300 | 0.08238374829430 | T | T | T |
| 0.00058476223006 | 0.19372227725000 | 0.41571584000200 | T | T | T |
| 0.00058468486588 | 0.19372259879900 | 0.74904984758200 | T | T | T |
| 0.33391708283000 | 0.19372246503800 | 0.08238368246210 | T | T | T |
| 0.33391704639300 | 0.19372248955500 | 0.41571584909300 | T | T | T |
| 0.33391726187600 | 0.19372273147200 | 0.74904983824400 | T | T | T |
| 0.66725126786100 | 0.19372310221100 | 0.08238347114300 | T | T | T |
| 0.66725131164000 | 0.19372322193300 | 0.41571583215500 | T | T | T |
| 0.66725126435900 | 0.19372321340800 | 0.74904982081400 | T | T | T |
| 0.00002136236583 | 0.19525043682800 | 0.30543984961500 | T | T | T |
| 0.00002129943814 | 0.19525131070000 | 0.63877344950400 | T | T | T |
| 0.00002125608388 | 0.19525108624200 | 0.97210731504800 | T | T | T |
| 0.33335352616000 | 0.19525068212000 | 0.30543987279300 | T | T | T |
| 0.33335374297500 | 0.19525148194300 | 0.63877349680800 | T | T | T |
| 0.33335373974600 | 0.19525126025800 | 0.97210727380600 | T | T | T |
| 0.66668786695000 | 0.19525151039800 | 0.30543983905600 | T | T | T |
| 0.66668783807900 | 0.19525210510300 | 0.63877359261800 | T | T | T |
| 0.66668782432700 | 0.19525182598700 | 0.97210710818300 | T | T | T |
| 0.33325935968200 | 0.19278482478600 | 0.19331401379200 | T | T | T |
| 0.33325952660300 | 0.19278540598400 | 0.52664662170500 | T | T | T |
| 0.33325964654700 | 0.19278529407400 | 0.85998054565000 | T | T | T |
| 0.66659371196400 | 0.19278560886100 | 0.19331396043100 | T | T | T |
| 0.66659375472100 | 0.19278612365400 | 0.52664675474900 | T | T | T |
| 0.66659369219200 | 0.19278577942400 | 0.85998048807600 | T | T | T |
| 0.99992717768900 | 0.19278456902800 | 0.19331405360500 | T | T | T |
| 0.99992721756900 | 0.19278519131500 | 0.52664660997800 | T | T | T |
| 0.99992711894600 | 0.19278513761500 | 0.85998059837400 | T | T | T |
| 0.16679394195100 | 0.19722136922600 | 0.08554944548710 | T | T | T |
| 0.16679391724600 | 0.19722140924800 | 0.41888158204100 | T | T | T |

|                  |                  |                  |   |   |   |
|------------------|------------------|------------------|---|---|---|
| 0.16679392508600 | 0.19722186519000 | 0.75221577056400 | T | T | T |
| 0.50012687153100 | 0.19722220729200 | 0.08554939210520 | T | T | T |
| 0.50012679631700 | 0.19722233737400 | 0.41888181892700 | T | T | T |
| 0.50012694051500 | 0.19722249469900 | 0.75221591486000 | T | T | T |
| 0.83346135854200 | 0.19722190733200 | 0.08554941275280 | T | T | T |
| 0.83346137889200 | 0.19722201914900 | 0.41888174366300 | T | T | T |
| 0.83346114751000 | 0.19722227369400 | 0.75221587649000 | T | T | T |
| 0.16652407033100 | 0.19519984256000 | 0.30549064828500 | T | T | T |
| 0.16652405283300 | 0.19520068065000 | 0.63882419143400 | T | T | T |
| 0.16652406466200 | 0.19520048433600 | 0.97215806746200 | T | T | T |
| 0.49985698135000 | 0.19520081389400 | 0.30549068064300 | T | T | T |
| 0.49985705207500 | 0.19520139393400 | 0.63882433466300 | T | T | T |
| 0.49985707993400 | 0.19520113568400 | 0.97215792815300 | T | T | T |
| 0.83319155568300 | 0.19520046156600 | 0.30549066143100 | T | T | T |
| 0.83319134125600 | 0.19520113361900 | 0.63882428872400 | T | T | T |
| 0.83319136446300 | 0.19520088413500 | 0.97215797854300 | T | T | T |
| 0.16615466089800 | 0.19322996519300 | 0.19306873152100 | T | T | T |
| 0.16615459689100 | 0.19323048393400 | 0.52640125779800 | T | T | T |
| 0.16615462623000 | 0.19323049056600 | 0.85973523267500 | T | T | T |
| 0.49948756258100 | 0.19323079357500 | 0.19306856625100 | T | T | T |
| 0.49948751651200 | 0.19323121547600 | 0.52640133319000 | T | T | T |
| 0.49948765531600 | 0.19323100052200 | 0.85973511139800 | T | T | T |
| 0.83282213207300 | 0.19323049069500 | 0.19306859738700 | T | T | T |
| 0.83282197519000 | 0.19323095750500 | 0.52640129822300 | T | T | T |
| 0.83282184236100 | 0.19323080578100 | 0.85973515149500 | T | T | T |
| 0.08371446052750 | 0.19625315349300 | 0.08469995612680 | T | T | T |
| 0.08371452710190 | 0.19625314012700 | 0.41803208050900 | T | T | T |
| 0.08371452617530 | 0.19625356415400 | 0.75136613790100 | T | T | T |
| 0.41704712833100 | 0.19625367887500 | 0.08469981418520 | T | T | T |
| 0.41704710537500 | 0.19625373590700 | 0.41803214617500 | T | T | T |



|                  |                  |                  |   |   |   |
|------------------|------------------|------------------|---|---|---|
| 0.41704731074500 | 0.19625395543200 | 0.75136615531100 | T | T | T |
| 0.75038162950000 | 0.19625390318200 | 0.08469977322090 | T | T | T |
| 0.75038170364200 | 0.19625399590400 | 0.41803215661000 | T | T | T |
| 0.75038154043600 | 0.19625412399200 | 0.75136617302100 | T | T | T |
| 0.08321771222780 | 0.19511986535600 | 0.30529057010400 | T | T | T |
| 0.08321773855480 | 0.19512062491500 | 0.63862415361900 | T | T | T |
| 0.08321770127520 | 0.19512045076000 | 0.97195803922800 | T | T | T |
| 0.41655019983300 | 0.19512052186400 | 0.30529062830000 | T | T | T |
| 0.41655041714600 | 0.19512110156400 | 0.63862427430100 | T | T | T |
| 0.41655041300900 | 0.19512089086400 | 0.97195795837500 | T | T | T |
| 0.74988485277400 | 0.19512077643400 | 0.30529059457700 | T | T | T |
| 0.74988476085800 | 0.19512129947900 | 0.63862430118800 | T | T | T |
| 0.74988475568500 | 0.19512105855900 | 0.97195788746400 | T | T | T |
| 0.08369638500810 | 0.19355866822100 | 0.19301060629300 | T | T | T |
| 0.08369651589190 | 0.19355916104200 | 0.52634299081300 | T | T | T |
| 0.08369648640300 | 0.19355918498600 | 0.85967697404700 | T | T | T |
| 0.41702898068600 | 0.19355930093400 | 0.19301040668600 | T | T | T |
| 0.41702917894300 | 0.19355970763300 | 0.52634297233900 | T | T | T |
| 0.41702929008700 | 0.19355956725800 | 0.85967682471300 | T | T | T |
| 0.75036359926700 | 0.19355956648400 | 0.19301041989200 | T | T | T |
| 0.75036367150200 | 0.19355996454600 | 0.52634304355200 | T | T | T |
| 0.75036352721200 | 0.19355972105200 | 0.85967682547800 | T | T | T |
| 0.25006723876300 | 0.19288455964700 | 0.08157512953870 | T | T | T |
| 0.25006716021200 | 0.19288455793200 | 0.41490723492000 | T | T | T |
| 0.25006720369000 | 0.19288480890800 | 0.74824118949000 | T | T | T |
| 0.58340065890800 | 0.19288530736600 | 0.08157482757560 | T | T | T |
| 0.58340059497400 | 0.19288542847800 | 0.41490721145400 | T | T | T |
| 0.58340062058500 | 0.19288537701100 | 0.74824115447100 | T | T | T |
| 0.91673478709800 | 0.19288470278000 | 0.08157504205140 | T | T | T |
| 0.91673480166000 | 0.19288474465400 | 0.41490721601600 | T | T | T |

|                  |                  |                  |   |   |   |
|------------------|------------------|------------------|---|---|---|
| 0.91673455963800 | 0.19288493218200 | 0.74824117324000 | T | T | T |
| 0.25007603314000 | 0.19524686858000 | 0.30509573423300 | T | T | T |
| 0.25007609533800 | 0.19524764324700 | 0.63842937945600 | T | T | T |
| 0.25007611739700 | 0.19524746463600 | 0.97176322027000 | T | T | T |
| 0.58340960349200 | 0.19524793937700 | 0.30509575124300 | T | T | T |
| 0.58340960009300 | 0.19524844447100 | 0.63842952903600 | T | T | T |
| 0.58340961634900 | 0.19524818834400 | 0.97176304927800 | T | T | T |
| 0.91674378175500 | 0.19524709314900 | 0.30509574837000 | T | T | T |
| 0.91674357946800 | 0.19524781200900 | 0.63842941867800 | T | T | T |
| 0.91674359121600 | 0.19524759818400 | 0.97176320815700 | T | T | T |
| 0.25007458446500 | 0.19410610285600 | 0.19308596100000 | T | T | T |
| 0.25007453060800 | 0.19410660181500 | 0.52641832959800 | T | T | T |
| 0.25007462437400 | 0.19410658621500 | 0.85975233445600 | T | T | T |
| 0.58340807675700 | 0.19410715380700 | 0.19308575479200 | T | T | T |
| 0.58340798134000 | 0.19410753668100 | 0.52641839551300 | T | T | T |
| 0.58340808070200 | 0.19410723221900 | 0.85975217644000 | T | T | T |
| 0.91674226502400 | 0.19410628227500 | 0.19308586479400 | T | T | T |
| 0.91674209817900 | 0.19410676615900 | 0.52641832345000 | T | T | T |
| 0.91674200080500 | 0.19410669156600 | 0.85975229926100 | T | T | T |
| 0.12479541139800 | 0.26531647238400 | 0.03216156732410 | T | T | T |
| 0.12479544234400 | 0.26531588767000 | 0.36549389733700 | T | T | T |
| 0.12479542427400 | 0.26531711908300 | 0.69882791933800 | T | T | T |
| 0.45812827671700 | 0.26531751666200 | 0.03216157331440 | T | T | T |
| 0.45812819246000 | 0.26531718642600 | 0.36549411455000 | T | T | T |
| 0.45812833056500 | 0.26531800560600 | 0.69882810836400 | T | T | T |
| 0.79146259666300 | 0.26531745365800 | 0.03216154952340 | T | T | T |
| 0.79146268637000 | 0.26531712121200 | 0.36549406686600 | T | T | T |
| 0.79146250384500 | 0.26531795453800 | 0.69882808641900 | T | T | T |
| 0.12433666042100 | 0.26252808295600 | 0.25185617401000 | T | T | T |
| 0.12433680741000 | 0.26252956220800 | 0.58518949921800 | T | T | T |

|                  |                  |                  |   |   |   |
|------------------|------------------|------------------|---|---|---|
| 0.12433678937600 | 0.26252945298400 | 0.91852336332700 | T | T | T |
| 0.45766949738100 | 0.26252943570100 | 0.25185622511300 | T | T | T |
| 0.45766971813800 | 0.26253060438900 | 0.58518966875700 | T | T | T |
| 0.45766975741600 | 0.26253035015100 | 0.91852333783400 | T | T | T |
| 0.79100395202900 | 0.26252935384200 | 0.25185622684900 | T | T | T |
| 0.79100398626600 | 0.26253055693400 | 0.58518967649600 | T | T | T |
| 0.79100391208300 | 0.26253028355100 | 0.91852334680100 | T | T | T |
| 0.12705287524500 | 0.26754409873200 | 0.14219465582300 | T | T | T |
| 0.12705301759800 | 0.26754483213900 | 0.47552707507800 | T | T | T |
| 0.12705310329200 | 0.26754525577600 | 0.80886109295500 | T | T | T |
| 0.46038588138600 | 0.26754532745700 | 0.14219449750700 | T | T | T |
| 0.46038602209700 | 0.26754597530400 | 0.47552712115200 | T | T | T |
| 0.46038618641300 | 0.26754606902500 | 0.80886104037400 | T | T | T |
| 0.79372027958200 | 0.26754531832600 | 0.14219459240200 | T | T | T |
| 0.79372040052500 | 0.26754599906200 | 0.47552720230200 | T | T | T |
| 0.79372028510600 | 0.26754605128400 | 0.80886110720800 | T | T | T |
| 0.29181167840700 | 0.26555147941000 | 0.03132047019170 | T | T | T |
| 0.29181157979100 | 0.26555092619700 | 0.36465280677600 | T | T | T |
| 0.29181172320300 | 0.26555214379400 | 0.69798681689000 | T | T | T |
| 0.62514544647100 | 0.26555279967800 | 0.03132039470970 | T | T | T |
| 0.62514544685400 | 0.26555252850300 | 0.36465292987200 | T | T | T |
| 0.62514545209100 | 0.26555324374900 | 0.69798696715900 | T | T | T |
| 0.95847915728400 | 0.26555145177200 | 0.03132046983700 | T | T | T |
| 0.95847924720600 | 0.26555093060900 | 0.36465279757800 | T | T | T |
| 0.95847911776600 | 0.26555215967800 | 0.69798681455700 | T | T | T |
| 0.29136582211000 | 0.26412063545600 | 0.25118771957800 | T | T | T |
| 0.29136608647900 | 0.26412219538300 | 0.58452116508600 | T | T | T |
| 0.29136610826700 | 0.26412202494800 | 0.91785496732900 | T | T | T |
| 0.62469977708900 | 0.26412220444800 | 0.25118780298900 | T | T | T |
| 0.62469991161800 | 0.26412344347300 | 0.58452139101500 | T | T | T |

|                  |                  |                  |   |   |   |
|------------------|------------------|------------------|---|---|---|
| 0.62469988518000 | 0.26412308356700 | 0.91785495794300 | T | T | T |
| 0.95803355420200 | 0.26412065635100 | 0.25118772252300 | T | T | T |
| 0.95803361814300 | 0.26412222119300 | 0.58452117084900 | T | T | T |
| 0.95803353536600 | 0.26412202634500 | 0.91785499178700 | T | T | T |
| 0.29338543051900 | 0.26516814506200 | 0.14110500237800 | T | T | T |
| 0.29338544929700 | 0.26516897595000 | 0.47443749584200 | T | T | T |
| 0.29338559076300 | 0.26516936983500 | 0.80777158842400 | T | T | T |
| 0.62671929648000 | 0.26516970676600 | 0.14110502469100 | T | T | T |
| 0.62671929693200 | 0.26517049472200 | 0.47443773430700 | T | T | T |
| 0.62671931605700 | 0.26517041572500 | 0.80777166991200 | T | T | T |
| 0.96005305120200 | 0.26516813908600 | 0.14110499453600 | T | T | T |
| 0.96005306103200 | 0.26516899294000 | 0.47443749947400 | T | T | T |
| 0.96005296180600 | 0.26516938895700 | 0.80777160609000 | T | T | T |
| 0.04199882043050 | 0.26590617358200 | 0.03169523398520 | T | T | T |
| 0.04199889124410 | 0.26590558884400 | 0.36502753986000 | T | T | T |
| 0.04199885852290 | 0.26590688411400 | 0.69836156863600 | T | T | T |
| 0.37533144765700 | 0.26590679780500 | 0.03169522319950 | T | T | T |
| 0.37533134083300 | 0.26590634697800 | 0.36502765542800 | T | T | T |
| 0.37533153849500 | 0.26590739157800 | 0.69836166656400 | T | T | T |
| 0.70866567065600 | 0.26590754567300 | 0.03169517565850 | T | T | T |
| 0.70866573732700 | 0.26590725347700 | 0.36502770839600 | T | T | T |
| 0.70866564037800 | 0.26590800786600 | 0.69836174931600 | T | T | T |
| 0.04092571716290 | 0.26441654572200 | 0.25106766308000 | T | T | T |
| 0.04092561159490 | 0.26441807063600 | 0.58440104144200 | T | T | T |
| 0.04092556722650 | 0.26441792940300 | 0.91773490604500 | T | T | T |
| 0.37425809819600 | 0.26441732897800 | 0.25106772796900 | T | T | T |
| 0.37425816289300 | 0.26441866621500 | 0.58440116176600 | T | T | T |
| 0.37425821998200 | 0.26441844863100 | 0.91773490751300 | T | T | T |
| 0.70759248863400 | 0.26441815451000 | 0.25106775155400 | T | T | T |
| 0.70759236067000 | 0.26441933719500 | 0.58440128075200 | T | T | T |

|                  |                  |                  |   |   |   |
|------------------|------------------|------------------|---|---|---|
| 0.70759232370200 | 0.26441900423100 | 0.91773488242600 | T | T | T |
| 0.04112705668620 | 0.26555268898500 | 0.14229805262000 | T | T | T |
| 0.04112713901240 | 0.26555350153100 | 0.47563051401500 | T | T | T |
| 0.04112710905290 | 0.26555392796700 | 0.80896457597100 | T | T | T |
| 0.37445958253800 | 0.26555341879700 | 0.14229799473100 | T | T | T |
| 0.37445966872700 | 0.26555416893900 | 0.47563057137800 | T | T | T |
| 0.37445983647800 | 0.26555439737400 | 0.80896455967500 | T | T | T |
| 0.70779394102200 | 0.26555429906700 | 0.14229803733400 | T | T | T |
| 0.70779400247700 | 0.26555504543800 | 0.47563072558400 | T | T | T |
| 0.70779391212300 | 0.26555497867500 | 0.80896462201200 | T | T | T |
| 0.20804321513200 | 0.26573922535800 | 0.03134822640580 | T | T | T |
| 0.20804315570000 | 0.26573862945700 | 0.36468055600300 | T | T | T |
| 0.20804321127800 | 0.26573988441400 | 0.69801456034400 | T | T | T |
| 0.54137644652900 | 0.26574056495300 | 0.03134818602580 | T | T | T |
| 0.54137637846000 | 0.26574028465900 | 0.36468075195700 | T | T | T |
| 0.54137646371900 | 0.26574102128800 | 0.69801475400500 | T | T | T |
| 0.87471058526400 | 0.26573976993700 | 0.03134823012790 | T | T | T |
| 0.87471066086200 | 0.26573934678900 | 0.36468066318700 | T | T | T |
| 0.87471048011600 | 0.26574037643700 | 0.69801466210500 | T | T | T |
| 0.20735040450400 | 0.26449567432600 | 0.25108253169800 | T | T | T |
| 0.20735016442300 | 0.26449720204000 | 0.58441589497000 | T | T | T |
| 0.20735023211600 | 0.26449706214700 | 0.91774974405400 | T | T | T |
| 0.54068355637700 | 0.26449733646700 | 0.25108259906700 | T | T | T |
| 0.54068333280500 | 0.26449850530700 | 0.58441611081500 | T | T | T |
| 0.54068343497000 | 0.26449816853200 | 0.91774972233100 | T | T | T |
| 0.87401786248900 | 0.26449638550900 | 0.25108254143900 | T | T | T |
| 0.87401747956500 | 0.26449775685000 | 0.58441598007600 | T | T | T |
| 0.87401747842600 | 0.26449751551000 | 0.91774973900200 | T | T | T |
| 0.20874892596300 | 0.25716948291800 | 0.13451465038100 | T | T | T |
| 0.20874873188000 | 0.25716988681100 | 0.46784698410200 | T | T | T |

|                  |                  |                  |   |   |   |
|------------------|------------------|------------------|---|---|---|
| 0.20874864161500 | 0.25717009395600 | 0.80118091670200 | T | T | T |
| 0.54208191977600 | 0.25717061578100 | 0.13451439815600 | T | T | T |
| 0.54208170897500 | 0.25717096484300 | 0.46784697865300 | T | T | T |
| 0.54208173702600 | 0.25717082235500 | 0.80118080994800 | T | T | T |
| 0.87541620787800 | 0.25716991015000 | 0.13451448551900 | T | T | T |
| 0.87541599127700 | 0.25717030400200 | 0.46784693925800 | T | T | T |
| 0.87541574563700 | 0.25717038146300 | 0.80118085202100 | T | T | T |
| 0.18931731292400 | 0.37736229062900 | 0.22780282034300 | T | T | T |
| 0.18931750027500 | 0.37736244881000 | 0.56113613727600 | T | T | T |
| 0.18931754449300 | 0.37736240736200 | 0.89446952459900 | T | T | T |
| 0.52265070994600 | 0.37736246843500 | 0.22780282561100 | T | T | T |
| 0.52265088891700 | 0.37736259073400 | 0.56113616145100 | T | T | T |
| 0.52265093871700 | 0.37736252077100 | 0.89446951987100 | T | T | T |
| 0.85598421798000 | 0.37736237792200 | 0.22780281722700 | T | T | T |
| 0.85598436676000 | 0.37736252000800 | 0.56113614796900 | T | T | T |
| 0.85598439121300 | 0.37736246110600 | 0.89446952020100 | T | T | T |
| 0.22249037754700 | 0.33811374530500 | 0.24027390045000 | T | T | T |
| 0.22249039367500 | 0.33811356439600 | 0.57360729547600 | T | T | T |
| 0.22249039891000 | 0.33811342083200 | 0.90694072791700 | T | T | T |
| 0.55582370460000 | 0.33811401462200 | 0.24027386728800 | T | T | T |
| 0.55582372430900 | 0.33811372533000 | 0.57360730177500 | T | T | T |
| 0.55582373143500 | 0.33811353715700 | 0.90694070900400 | T | T | T |
| 0.88915714973800 | 0.33811385752600 | 0.24027389239000 | T | T | T |
| 0.88915714955300 | 0.33811364245800 | 0.57360730003000 | T | T | T |
| 0.88915714783700 | 0.33811346520500 | 0.90694072759300 | T | T | T |
| 0.16232892277800 | 0.36220851763800 | 0.24761694414300 | T | T | T |
| 0.16232890353100 | 0.36220861853500 | 0.58095034333000 | T | T | T |
| 0.16232889737400 | 0.36220854753200 | 0.91428375637300 | T | T | T |
| 0.49566219275200 | 0.36220866073800 | 0.24761700097200 | T | T | T |
| 0.49566218376800 | 0.36220871994000 | 0.58095041187900 | T | T | T |

|                  |                  |                  |   |   |   |
|------------------|------------------|------------------|---|---|---|
| 0.49566218162900 | 0.36220863139400 | 0.91428379116500 | T | T | T |
| 0.82899567560000 | 0.36220861873500 | 0.24761699070300 | T | T | T |
| 0.82899564074200 | 0.36220869328900 | 0.58095039747800 | T | T | T |
| 0.82899562856000 | 0.36220860490700 | 0.91428378667300 | T | T | T |
| 0.16186536051300 | 0.35213988015800 | 0.21376652939400 | T | T | T |
| 0.16186530476100 | 0.35213983470700 | 0.54709970944700 | T | T | T |
| 0.16186529097500 | 0.35213968991100 | 0.88043305114200 | T | T | T |
| 0.49519863111200 | 0.35214001111100 | 0.21376649008800 | T | T | T |
| 0.49519857788800 | 0.35213992119400 | 0.54709968915900 | T | T | T |
| 0.49519857186800 | 0.35213972726400 | 0.88043299851900 | T | T | T |
| 0.82853211384000 | 0.35213998851600 | 0.21376650583100 | T | T | T |
| 0.82853204253000 | 0.35213991592200 | 0.54709970175000 | T | T | T |
| 0.82853201641700 | 0.35213972682200 | 0.88043301892000 | T | T | T |
| 0.17677573026800 | 0.32354190573100 | 0.27350947529700 | T | T | T |
| 0.17677600332500 | 0.32354178669500 | 0.60684284897100 | T | T | T |
| 0.17677596638800 | 0.32354177498500 | 0.94017625031300 | T | T | T |
| 0.51010898756700 | 0.32354219613700 | 0.27350947827900 | T | T | T |
| 0.51010930366200 | 0.32354196655600 | 0.60684287052200 | T | T | T |
| 0.51010927446100 | 0.32354193541000 | 0.94017624396200 | T | T | T |
| 0.84344258147500 | 0.32354195387600 | 0.27350948114400 | T | T | T |
| 0.84344282484600 | 0.32354180501900 | 0.60684286567100 | T | T | T |
| 0.84344279525700 | 0.32354177079500 | 0.94017625066500 | T | T | T |
| 0.14370691851800 | 0.31974919659500 | 0.26939736684300 | T | T | T |
| 0.14370677474300 | 0.31974920482000 | 0.60273069514000 | T | T | T |
| 0.14370677222100 | 0.31974914140900 | 0.93606409924300 | T | T | T |
| 0.47704013625600 | 0.31974938189000 | 0.26939736376400 | T | T | T |
| 0.47704000562700 | 0.31974931879000 | 0.60273070873800 | T | T | T |
| 0.47704000431300 | 0.31974923620200 | 0.93606408281800 | T | T | T |
| 0.81037368885300 | 0.31974942318400 | 0.26939737720600 | T | T | T |
| 0.81037351422800 | 0.31974935824600 | 0.60273071739500 | T | T | T |

|                  |                  |                  |   |   |   |
|------------------|------------------|------------------|---|---|---|
| 0.81037350729600 | 0.31974927188700 | 0.93606409720700 | T | T | T |
| 0.23026863672100 | 0.38652094142800 | 0.24877559325200 | T | T | T |
| 0.23026880005600 | 0.38652140796100 | 0.58210918678600 | T | T | T |
| 0.23026876240000 | 0.38652129638700 | 0.91544251516600 | T | T | T |
| 0.56360205370200 | 0.38652128044600 | 0.24877572939800 | T | T | T |
| 0.56360222022800 | 0.38652170853100 | 0.58210934370000 | T | T | T |
| 0.56360215235900 | 0.38652152269500 | 0.91544259623000 | T | T | T |
| 0.89693545034200 | 0.38652111461100 | 0.24877570455600 | T | T | T |
| 0.89693559633400 | 0.38652155995800 | 0.58210929546100 | T | T | T |
| 0.89693553978800 | 0.38652141322200 | 0.91544259174500 | T | T | T |
| 0.14467166902600 | 0.29940742223700 | 0.18254262478300 | T | T | T |
| 0.14467157441500 | 0.29940752551100 | 0.51587579576800 | T | T | T |
| 0.14467149586100 | 0.29940749157000 | 0.84920913752200 | T | T | T |
| 0.47800483372300 | 0.29940756640800 | 0.18254253524400 | T | T | T |
| 0.47800476597900 | 0.29940765466100 | 0.51587575977500 | T | T | T |
| 0.47800469793100 | 0.29940757194200 | 0.84920906348400 | T | T | T |
| 0.81133842210300 | 0.29940755934900 | 0.18254262039300 | T | T | T |
| 0.81133832234600 | 0.29940765054700 | 0.51587582273400 | T | T | T |
| 0.81133821021900 | 0.29940756927500 | 0.84920912358600 | T | T | T |
| 0.17873178774800 | 0.30767834299700 | 0.18678412787400 | T | T | T |
| 0.17873190526600 | 0.30767848076000 | 0.52011733330500 | T | T | T |
| 0.17873198628900 | 0.30767847040100 | 0.85345069259700 | T | T | T |
| 0.51206519879700 | 0.30767854765900 | 0.18678407333100 | T | T | T |
| 0.51206528974800 | 0.30767865218400 | 0.52011732743100 | T | T | T |
| 0.51206538527300 | 0.30767859663800 | 0.85345064584800 | T | T | T |
| 0.84539872028600 | 0.30767847252000 | 0.18678402717900 | T | T | T |
| 0.84539878942900 | 0.30767859000700 | 0.52011727803300 | T | T | T |
| 0.84539883811900 | 0.30767854871900 | 0.85345062703500 | T | T | T |
| 0.18831407301500 | 0.88545513210000 | 0.22872842165400 | T | T | T |
| 0.18831426572300 | 0.88545494640000 | 0.56206173310700 | T | T | T |



|                  |                  |                  |   |   |   |
|------------------|------------------|------------------|---|---|---|
| 0.18831430686500 | 0.88545497818800 | 0.89539512940100 | T | T | T |
| 0.52164746643100 | 0.88545489461700 | 0.22872842784000 | T | T | T |
| 0.52164765091500 | 0.88545475533700 | 0.56206176124300 | T | T | T |
| 0.52164770339400 | 0.88545483224200 | 0.89539512468200 | T | T | T |
| 0.85498102175800 | 0.88545502093000 | 0.22872841751900 | T | T | T |
| 0.85498116757500 | 0.88545485518000 | 0.56206174497300 | T | T | T |
| 0.85498117870400 | 0.88545491238300 | 0.89539512420700 | T | T | T |
| 0.22151459209400 | 0.92373922417100 | 0.24134371196700 | T | T | T |
| 0.22151460248700 | 0.92373934386700 | 0.57467709760000 | T | T | T |
| 0.22151460711200 | 0.92373943579200 | 0.90801052644200 | T | T | T |
| 0.55484790210600 | 0.92373881435200 | 0.24134366271900 | T | T | T |
| 0.55484791934900 | 0.92373907417900 | 0.57467709579600 | T | T | T |
| 0.55484793181400 | 0.92373926411400 | 0.90801050361700 | T | T | T |
| 0.88818138135300 | 0.92373908327200 | 0.24134370010500 | T | T | T |
| 0.88818137214200 | 0.92373923899100 | 0.57467709937400 | T | T | T |
| 0.88818136716300 | 0.92373938323700 | 0.90801052510500 | T | T | T |
| 0.16108937130200 | 0.90013657464000 | 0.24845205289600 | T | T | T |
| 0.16108934525300 | 0.90013645144500 | 0.58178545512900 | T | T | T |
| 0.16108934064800 | 0.90013651218300 | 0.91511887612200 | T | T | T |
| 0.49442262039100 | 0.90013638616400 | 0.24845212032600 | T | T | T |
| 0.49442260794900 | 0.90013631511300 | 0.58178553666600 | T | T | T |
| 0.49442261240000 | 0.90013640595400 | 0.91511891889300 | T | T | T |
| 0.82775614290500 | 0.90013644148700 | 0.24845210733900 | T | T | T |
| 0.82775609764700 | 0.90013635133600 | 0.58178551842300 | T | T | T |
| 0.82775608222700 | 0.90013644055400 | 0.91511891158300 | T | T | T |
| 0.16094675974500 | 0.91095869820800 | 0.21448377693700 | T | T | T |
| 0.16094670049700 | 0.91095873098900 | 0.54781694181900 | T | T | T |
| 0.16094669002800 | 0.91095884805500 | 0.88115030209600 | T | T | T |
| 0.49428001159400 | 0.91095852577200 | 0.21448373089400 | T | T | T |
| 0.49427995716000 | 0.91095861202100 | 0.54781691810000 | T | T | T |

|                  |                  |                  |   |   |   |
|------------------|------------------|------------------|---|---|---|
| 0.49427995910500 | 0.91095879639900 | 0.88115024144800 | T | T | T |
| 0.82761353433700 | 0.91095855958000 | 0.21448374847800 | T | T | T |
| 0.82761345613600 | 0.91095862472400 | 0.54781693244300 | T | T | T |
| 0.82761342694300 | 0.91095880263200 | 0.88115026398000 | T | T | T |
| 0.17514564086300 | 0.93764624723600 | 0.27532115753200 | T | T | T |
| 0.17514591180900 | 0.93764634154400 | 0.60865453890700 | T | T | T |
| 0.17514586180500 | 0.93764633704300 | 0.94198794529200 | T | T | T |
| 0.50847885491700 | 0.93764588066500 | 0.27532116962100 | T | T | T |
| 0.50847918177200 | 0.93764610784100 | 0.60865457137100 | T | T | T |
| 0.50847915371000 | 0.93764614431000 | 0.94198794404500 | T | T | T |
| 0.84181252822200 | 0.93764619322700 | 0.27532117119700 | T | T | T |
| 0.84181276240400 | 0.93764632008600 | 0.60865456375700 | T | T | T |
| 0.84181271582100 | 0.93764634390300 | 0.94198794973600 | T | T | T |
| 0.14219324796700 | 0.94146982924500 | 0.27068212880200 | T | T | T |
| 0.14219309443700 | 0.94146980821500 | 0.60401545588000 | T | T | T |
| 0.14219310210800 | 0.94146985527400 | 0.93734887000800 | T | T | T |
| 0.47552644070800 | 0.94146961255600 | 0.27068213296500 | T | T | T |
| 0.47552630385800 | 0.94146967341100 | 0.60401547759900 | T | T | T |
| 0.47552631586400 | 0.94146975033200 | 0.93734885579300 | T | T | T |
| 0.80886005061000 | 0.94146954615800 | 0.27068215152800 | T | T | T |
| 0.80885985867600 | 0.94146961292500 | 0.60401549012200 | T | T | T |
| 0.80885985177800 | 0.94146970243500 | 0.93734887254800 | T | T | T |
| 0.22894348037900 | 0.87516941865400 | 0.24980579348000 | T | T | T |
| 0.22894363826000 | 0.87516890995500 | 0.58313939420400 | T | T | T |
| 0.22894361373600 | 0.87516899556100 | 0.91647274758200 | T | T | T |
| 0.56227691019800 | 0.87516896112000 | 0.24980597625100 | T | T | T |
| 0.56227707017300 | 0.87516850821800 | 0.58313959625300 | T | T | T |
| 0.56227701001200 | 0.87516870466200 | 0.91647285305200 | T | T | T |
| 0.89561031221800 | 0.87516921276900 | 0.24980592257900 | T | T | T |
| 0.89561045022600 | 0.87516872890500 | 0.58313952023700 | T | T | T |

|                  |                  |                  |   |   |   |
|------------------|------------------|------------------|---|---|---|
| 0.89561040111200 | 0.87516886359400 | 0.91647283164400 | T | T | T |
| 0.14403839708800 | 0.96268696420100 | 0.18242395056300 | T | T | T |
| 0.14403829130200 | 0.96268685999400 | 0.51575709623100 | T | T | T |
| 0.14403822369500 | 0.96268688297700 | 0.84909045831700 | T | T | T |
| 0.47737151549100 | 0.96268681818700 | 0.18242381927300 | T | T | T |
| 0.47737144443000 | 0.96268672948900 | 0.51575703146900 | T | T | T |
| 0.47737140146400 | 0.96268680148400 | 0.84909036600700 | T | T | T |
| 0.81070517252700 | 0.96268681669400 | 0.18242393591200 | T | T | T |
| 0.81070505887000 | 0.96268672722600 | 0.51575711778400 | T | T | T |
| 0.81070495013300 | 0.96268680176400 | 0.84909043937000 | T | T | T |
| 0.17820224735200 | 0.95404948271600 | 0.18668163508100 | T | T | T |
| 0.17820237116700 | 0.95404933600400 | 0.52001481813000 | T | T | T |
| 0.17820244782200 | 0.95404934237400 | 0.85334819009600 | T | T | T |
| 0.51153565511900 | 0.95404925847700 | 0.18668155738400 | T | T | T |
| 0.51153575156700 | 0.95404914891700 | 0.52001479854800 | T | T | T |
| 0.51153584763800 | 0.95404920582000 | 0.85334813211800 | T | T | T |
| 0.84486923086500 | 0.95404933851500 | 0.18668150834700 | T | T | T |
| 0.84486929750200 | 0.95404921553600 | 0.52001474405400 | T | T | T |
| 0.84486932636900 | 0.95404925820200 | 0.85334811337000 | T | T | T |
| 0.02989914879900 | 0.37493598289800 | 0.22216798916500 | T | T | T |
| 0.02989932629610 | 0.37493614335700 | 0.55550132245600 | T | T | T |
| 0.02989935698180 | 0.37493609912800 | 0.88883471512900 | T | T | T |
| 0.36323230672200 | 0.37493607609300 | 0.22216799076600 | T | T | T |
| 0.36323251521300 | 0.37493621480100 | 0.55550133092200 | T | T | T |
| 0.36323257147200 | 0.37493615820500 | 0.88883471177100 | T | T | T |
| 0.69656591142600 | 0.37493615982900 | 0.22216800509500 | T | T | T |
| 0.69656607842700 | 0.37493628760500 | 0.55550135813200 | T | T | T |
| 0.69656610857800 | 0.37493621032300 | 0.88883471847700 | T | T | T |
| 0.06020187207650 | 0.33414675274900 | 0.23909056243900 | T | T | T |
| 0.06020187161550 | 0.33414660357600 | 0.57242400680100 | T | T | T |

|                  |                  |                   |   |   |   |
|------------------|------------------|-------------------|---|---|---|
| 0.06020186255570 | 0.33414648091300 | 0.90575745165000  | T | T | T |
| 0.39353509232400 | 0.33414689355200 | 0.23909053979100  | T | T | T |
| 0.39353511083300 | 0.33414666782200 | 0.57242401647200  | T | T | T |
| 0.39353511175800 | 0.33414654296600 | 0.90575744041600  | T | T | T |
| 0.72686856103700 | 0.33414697985000 | 0.23909053899900  | T | T | T |
| 0.72686855758500 | 0.33414673016000 | 0.57242403017700  | T | T | T |
| 0.72686854765300 | 0.33414657754200 | 0.905757444445600 | T | T | T |
| 0.00063208686207 | 0.36306936693200 | 0.23968019315600  | T | T | T |
| 0.00063204625001 | 0.36306947402000 | 0.57301360096900  | T | T | T |
| 0.00063202347535 | 0.36306938975200 | 0.90634701831300  | T | T | T |
| 0.33396527219900 | 0.36306939303900 | 0.23968020690000  | T | T | T |
| 0.33396525622200 | 0.36306948640100 | 0.57301361997000  | T | T | T |
| 0.33396524628800 | 0.36306940361400 | 0.90634702561100  | T | T | T |
| 0.66729869985900 | 0.36306951496700 | 0.23968025944500  | T | T | T |
| 0.66729866623000 | 0.36306958224700 | 0.57301368276400  | T | T | T |
| 0.66729864708000 | 0.36306947601200 | 0.90634705970900  | T | T | T |
| 0.00382441541172 | 0.35046288166300 | 0.20594272060000  | T | T | T |
| 0.00382436958406 | 0.35046286258300 | 0.53927590068300  | T | T | T |
| 0.00382434472454 | 0.35046268323100 | 0.87260923411200  | T | T | T |
| 0.33715760097400 | 0.35046289434600 | 0.20594270411400  | T | T | T |
| 0.33715757384800 | 0.35046285960700 | 0.53927588782100  | T | T | T |
| 0.33715756971100 | 0.35046267550700 | 0.87260921306300  | T | T | T |
| 0.67049104505700 | 0.35046301495200 | 0.20594267154100  | T | T | T |
| 0.67049099800300 | 0.35046295768800 | 0.53927587436500  | T | T | T |
| 0.67049097983200 | 0.35046272055800 | 0.87260917327800  | T | T | T |
| 0.01201589923910 | 0.32625247200700 | 0.26836241240400  | T | T | T |
| 0.01201612936430 | 0.32625236462600 | 0.60169580956600  | T | T | T |
| 0.01201609873910 | 0.32625233659600 | 0.93502920923000  | T | T | T |
| 0.34534899528100 | 0.32625268992200 | 0.26836239924100  | T | T | T |
| 0.34534928868000 | 0.32625250957700 | 0.60169580720800  | T | T | T |

|                  |                  |                  |   |   |   |
|------------------|------------------|------------------|---|---|---|
| 0.34534926489700 | 0.32625248179900 | 0.93502919601000 | T | T | T |
| 0.67868253887300 | 0.32625274089700 | 0.26836241273200 | T | T | T |
| 0.67868280019100 | 0.32625252774500 | 0.60169583481000 | T | T | T |
| 0.67868277353300 | 0.32625248616500 | 0.93502920124100 | T | T | T |
| 0.31233322321600 | 0.32539833516200 | 0.26430783948400 | T | T | T |
| 0.31233306731600 | 0.32539832036100 | 0.59764118167100 | T | T | T |
| 0.31233306329000 | 0.32539824976900 | 0.93097457659000 | T | T | T |
| 0.64566668503800 | 0.32539861399300 | 0.26430784360900 | T | T | T |
| 0.64566648810900 | 0.32539851432200 | 0.59764120268700 | T | T | T |
| 0.64566647480500 | 0.32539841835100 | 0.93097456861000 | T | T | T |
| 0.97900011517000 | 0.32539841384000 | 0.26430784982500 | T | T | T |
| 0.97899991463200 | 0.32539839002200 | 0.59764118759600 | T | T | T |
| 0.97899989626200 | 0.32539830620400 | 0.93097458849200 | T | T | T |
| 0.07342131459890 | 0.38212015136600 | 0.24031326313600 | T | T | T |
| 0.07342153629100 | 0.38212064251200 | 0.57364676701900 | T | T | T |
| 0.07342148941160 | 0.38212055036900 | 0.90698013107200 | T | T | T |
| 0.40675458315400 | 0.38212029515300 | 0.24031325780200 | T | T | T |
| 0.40675482345500 | 0.38212076500800 | 0.57364678054000 | T | T | T |
| 0.40675476991100 | 0.38212064426100 | 0.90698012080000 | T | T | T |
| 0.74008814061800 | 0.38212052289300 | 0.24031337739400 | T | T | T |
| 0.74008835361900 | 0.38212096623700 | 0.57364689334800 | T | T | T |
| 0.74008826331700 | 0.38212079389300 | 0.90698019712900 | T | T | T |
| 0.31678016699500 | 0.30176435242800 | 0.17704107067600 | T | T | T |
| 0.31678007057900 | 0.30176449620800 | 0.51037426902500 | T | T | T |
| 0.31677995764800 | 0.30176444563900 | 0.84370759134200 | T | T | T |
| 0.65011363904900 | 0.30176455848300 | 0.17704112709400 | T | T | T |
| 0.65011352774900 | 0.30176468856800 | 0.51037434868600 | T | T | T |
| 0.65011336514900 | 0.30176456967400 | 0.84370761158100 | T | T | T |
| 0.98344712491300 | 0.30176435417400 | 0.17704117556600 | T | T | T |
| 0.98344698984400 | 0.30176450083300 | 0.51037435309100 | T | T | T |

|                  |                  |                  |   |   |   |
|------------------|------------------|------------------|---|---|---|
| 0.98344682882200 | 0.30176445284400 | 0.84370766702500 | T | T | T |
| 0.01693793062020 | 0.29877653722400 | 0.17654569139900 | T | T | T |
| 0.01693803136480 | 0.29877667169300 | 0.50987889025900 | T | T | T |
| 0.01693811478510 | 0.29877662148300 | 0.84321223991900 | T | T | T |
| 0.35027104290900 | 0.29877665240500 | 0.17654576605300 | T | T | T |
| 0.35027117512200 | 0.29877676611400 | 0.50987895891500 | T | T | T |
| 0.35027130605000 | 0.29877668651300 | 0.84321227644400 | T | T | T |
| 0.68360466678600 | 0.29877674758200 | 0.17654567299700 | T | T | T |
| 0.68360474649700 | 0.29877686809700 | 0.50987891787700 | T | T | T |
| 0.68360485286000 | 0.29877673704500 | 0.84321220418500 | T | T | T |
| 0.02966742214300 | 0.88644557672300 | 0.22165600631000 | T | T | T |
| 0.02966760821480 | 0.88644539148700 | 0.55498933099700 | T | T | T |
| 0.02966763638070 | 0.88644542439800 | 0.88832273275600 | T | T | T |
| 0.36300055561200 | 0.88644545916100 | 0.22165600760300 | T | T | T |
| 0.36300077685700 | 0.88644530020700 | 0.55498934069300 | T | T | T |
| 0.36300083933900 | 0.88644535131300 | 0.88832272939200 | T | T | T |
| 0.69633421245500 | 0.88644533572600 | 0.22165602170100 | T | T | T |
| 0.69633438392000 | 0.88644519334200 | 0.55498937021900 | T | T | T |
| 0.69633440842800 | 0.88644527894900 | 0.88832273647900 | T | T | T |
| 0.06028215548660 | 0.92723827249100 | 0.23769639317000 | T | T | T |
| 0.06028215890680 | 0.92723837762700 | 0.57102981685100 | T | T | T |
| 0.06028215088120 | 0.92723846455300 | 0.90436325812300 | T | T | T |
| 0.39361535909100 | 0.92723807400400 | 0.23769635750200 | T | T | T |
| 0.39361538454400 | 0.92723827609500 | 0.57102982121100 | T | T | T |
| 0.39361539068800 | 0.92723837982100 | 0.90436324308200 | T | T | T |
| 0.72694885452200 | 0.92723792524600 | 0.23769634676200 | T | T | T |
| 0.72694885435200 | 0.92723816028300 | 0.57102982764300 | T | T | T |
| 0.72694884382500 | 0.92723832796900 | 0.90436324693900 | T | T | T |
| 0.00031518727314 | 0.89773768429300 | 0.23925768558100 | T | T | T |
| 0.00031514375196 | 0.89773754915400 | 0.57259109577400 | T | T | T |

|                  |                  |                  |   |   |   |
|------------------|------------------|------------------|---|---|---|
| 0.00031512012827 | 0.89773762337900 | 0.90592452149600 | T | T | T |
| 0.33364835067700 | 0.89773764671300 | 0.23925770205800 | T | T | T |
| 0.33364833470700 | 0.89773752872700 | 0.57259111924500 | T | T | T |
| 0.33364833003400 | 0.89773760270700 | 0.90592453159400 | T | T | T |
| 0.66698179819600 | 0.89773746873300 | 0.23925776471800 | T | T | T |
| 0.66698176109700 | 0.89773738680000 | 0.57259119403400 | T | T | T |
| 0.66698174183900 | 0.89773750312000 | 0.90592457345600 | T | T | T |
| 0.00352436613977 | 0.91110258976400 | 0.20564200377700 | T | T | T |
| 0.00352432196050 | 0.91110258165500 | 0.53897517200900 | T | T | T |
| 0.00352429600214 | 0.91110273154500 | 0.87230852558700 | T | T | T |
| 0.33685752951000 | 0.91110256507500 | 0.20564198587700 | T | T | T |
| 0.33685750646900 | 0.91110257687200 | 0.53897515832300 | T | T | T |
| 0.33685750824300 | 0.91110273336900 | 0.87230850317700 | T | T | T |
| 0.67019099816400 | 0.91110238696200 | 0.20564194455600 | T | T | T |
| 0.67019095103000 | 0.91110242974700 | 0.53897514018200 | T | T | T |
| 0.67019093191900 | 0.91110266535300 | 0.87230845647600 | T | T | T |
| 0.01136107195410 | 0.93399797158200 | 0.26851458999300 | T | T | T |
| 0.01136130444760 | 0.93399804050900 | 0.60184799080100 | T | T | T |
| 0.01136126106630 | 0.93399805415300 | 0.93518139592900 | T | T | T |
| 0.34469412396300 | 0.93399770798500 | 0.26851457450300 | T | T | T |
| 0.34469443196700 | 0.93399786408600 | 0.60184798870500 | T | T | T |
| 0.34469440432000 | 0.93399788537300 | 0.93518138187200 | T | T | T |
| 0.67802770383700 | 0.93399761895500 | 0.26851460116500 | T | T | T |
| 0.67802797392100 | 0.93399781711400 | 0.60184802952500 | T | T | T |
| 0.67802794146300 | 0.93399787018100 | 0.93518139506000 | T | T | T |
| 0.31179059349000 | 0.93514481517900 | 0.26413721047200 | T | T | T |
| 0.31179044409300 | 0.93514478976800 | 0.59747055273900 | T | T | T |
| 0.31179045338700 | 0.93514484594200 | 0.93080395549500 | T | T | T |
| 0.64512409264000 | 0.93514443751200 | 0.26413722899500 | T | T | T |
| 0.64512389425100 | 0.93514451748900 | 0.59747058825700 | T | T | T |

|                  |                  |                  |   |   |   |
|------------------|------------------|------------------|---|---|---|
| 0.64512387993200 | 0.93514463293700 | 0.93080395393900 | T | T | T |
| 0.97845751781100 | 0.93514472579000 | 0.26413722107200 | T | T | T |
| 0.97845731908100 | 0.93514470858800 | 0.59747055829300 | T | T | T |
| 0.97845730522100 | 0.93514478446900 | 0.93080396730500 | T | T | T |
| 0.07330141807170 | 0.87924692205000 | 0.23907307174100 | T | T | T |
| 0.07330164486500 | 0.87924639792100 | 0.57240657426500 | T | T | T |
| 0.07330161563070 | 0.87924645604100 | 0.90573995970800 | T | T | T |
| 0.40663468333200 | 0.87924673290400 | 0.23907307257300 | T | T | T |
| 0.40663493012100 | 0.87924623727400 | 0.57240659533500 | T | T | T |
| 0.40663489518700 | 0.87924633417100 | 0.90573995442100 | T | T | T |
| 0.73996829600500 | 0.87924642557500 | 0.23907322704600 | T | T | T |
| 0.73996850855400 | 0.87924596683000 | 0.57240673987500 | T | T | T |
| 0.73996841842400 | 0.87924614683700 | 0.90574004754700 | T | T | T |
| 0.31672465240400 | 0.95924366118300 | 0.17675179953400 | T | T | T |
| 0.31672454108100 | 0.95924351300300 | 0.51008496597300 | T | T | T |
| 0.31672444801600 | 0.95924355342400 | 0.84341831062500 | T | T | T |
| 0.65005814164300 | 0.95924342664700 | 0.17675183988900 | T | T | T |
| 0.65005801443900 | 0.95924329498100 | 0.51008503779200 | T | T | T |
| 0.65005786451500 | 0.95924341265800 | 0.84341832546000 | T | T | T |
| 0.98339165761200 | 0.95924365843000 | 0.17675192624600 | T | T | T |
| 0.98339150039000 | 0.95924350879100 | 0.51008506584200 | T | T | T |
| 0.98339134446800 | 0.95924354742200 | 0.84341839617900 | T | T | T |
| 0.01688036715090 | 0.96210432627100 | 0.17630367946500 | T | T | T |
| 0.01688048957220 | 0.96210419155700 | 0.50963684084200 | T | T | T |
| 0.01688056476880 | 0.96210423049300 | 0.84297020739600 | T | T | T |
| 0.35021344629000 | 0.96210419717500 | 0.17630376269900 | T | T | T |
| 0.35021360384300 | 0.96210408403600 | 0.50963692032100 | T | T | T |
| 0.35021374035300 | 0.96210415782900 | 0.84297024768500 | T | T | T |
| 0.68354714193400 | 0.96210409831500 | 0.17630362043900 | T | T | T |
| 0.68354723331000 | 0.96210397656100 | 0.50963684431200 | T | T | T |



|                  |                  |                  |   |   |   |
|------------------|------------------|------------------|---|---|---|
| 0.68354732812700 | 0.96210410375200 | 0.84297015366200 | T | T | T |
| 0.23592323698200 | 0.36211486255400 | 0.15142895308500 | T | T | T |
| 0.23592325850400 | 0.36211527030000 | 0.48476230315100 | T | T | T |
| 0.23592326854100 | 0.36211541181200 | 0.81809577347900 | T | T | T |
| 0.56925661406800 | 0.36211538396400 | 0.15142907054900 | T | T | T |
| 0.56925663385400 | 0.36211582977500 | 0.48476247252800 | T | T | T |
| 0.56925663254600 | 0.36211576225500 | 0.81809585991600 | T | T | T |
| 0.90259001001300 | 0.36211502767000 | 0.15142898327100 | T | T | T |
| 0.90259002812000 | 0.36211546640500 | 0.48476235767300 | T | T | T |
| 0.90259001567200 | 0.36211554371900 | 0.81809580743500 | T | T | T |
| 0.23545874986200 | 0.89992915746300 | 0.15087231529300 | T | T | T |
| 0.23545876648600 | 0.89992875701900 | 0.48420563408100 | T | T | T |
| 0.23545877624000 | 0.89992856925300 | 0.81753912157800 | T | T | T |
| 0.56879212242500 | 0.89992854526400 | 0.15087242783300 | T | T | T |
| 0.56879213612200 | 0.89992809993400 | 0.48420580801500 | T | T | T |
| 0.56879213694600 | 0.89992814548500 | 0.81753921568100 | T | T | T |
| 0.90212553524200 | 0.89992898796900 | 0.15087233771300 | T | T | T |
| 0.90212554746100 | 0.89992855838400 | 0.48420568077600 | T | T | T |
| 0.90212553148100 | 0.89992843625900 | 0.81753915081700 | T | T | T |
| 0.22180211292400 | 0.36941064134800 | 0.23411748169600 | T | T | T |
| 0.22180191767300 | 0.36941191686300 | 0.56745016561400 | T | T | T |
| 0.22180197643500 | 0.36941201428500 | 0.90078413741500 | T | T | T |
| 0.55513540858400 | 0.36941133721700 | 0.23411735523400 | T | T | T |
| 0.55513519403400 | 0.36941249509800 | 0.56745011456300 | T | T | T |
| 0.55513528981000 | 0.36941255368300 | 0.90078400575500 | T | T | T |
| 0.88846934004800 | 0.36941083820500 | 0.23411736852500 | T | T | T |
| 0.88846906014100 | 0.36941206794500 | 0.56745009639300 | T | T | T |
| 0.88846908432000 | 0.36941216573100 | 0.90078404829400 | T | T | T |
| 0.16724691063800 | 0.37621634742500 | 0.22732217282500 | T | T | T |
| 0.16724676436600 | 0.37621758798200 | 0.56065513268600 | T | T | T |

|                  |                  |                  |   |   |   |
|------------------|------------------|------------------|---|---|---|
| 0.16724676444100 | 0.37621773568700 | 0.89398912044500 | T | T | T |
| 0.50057999831400 | 0.37621723473200 | 0.22732207347000 | T | T | T |
| 0.50057988170000 | 0.37621832031400 | 0.56065513475900 | T | T | T |
| 0.50057990141100 | 0.37621838968200 | 0.89398903762800 | T | T | T |
| 0.83391389653800 | 0.37621689220800 | 0.22732208996900 | T | T | T |
| 0.83391372020000 | 0.37621803329500 | 0.56065512229200 | T | T | T |
| 0.83391369958200 | 0.37621813515200 | 0.89398905784200 | T | T | T |
| 0.15951841671500 | 0.34253614418700 | 0.27206606708800 | T | T | T |
| 0.15951828678800 | 0.34253782385700 | 0.60539937039000 | T | T | T |
| 0.15951833064600 | 0.34253762866000 | 0.93873328518100 | T | T | T |
| 0.49285158630000 | 0.34253705401900 | 0.27206611752100 | T | T | T |
| 0.49285146127200 | 0.34253854897200 | 0.60539949276300 | T | T | T |
| 0.49285151132500 | 0.34253832367900 | 0.93873326557000 | T | T | T |
| 0.82618547600300 | 0.34253681789400 | 0.27206607387600 | T | T | T |
| 0.82618528287500 | 0.34253834917300 | 0.60539944026200 | T | T | T |
| 0.82618531636300 | 0.34253813311800 | 0.93873325623200 | T | T | T |
| 0.15946449144700 | 0.30641384269100 | 0.19685727780900 | T | T | T |
| 0.15946444318900 | 0.30641492196900 | 0.53019009047100 | T | T | T |
| 0.15946444730200 | 0.30641509530700 | 0.86352423913000 | T | T | T |
| 0.49279752953400 | 0.30641497487100 | 0.19685733608800 | T | T | T |
| 0.49279750826100 | 0.30641587508100 | 0.53019025009400 | T | T | T |
| 0.49279755371300 | 0.30641583228100 | 0.86352429746500 | T | T | T |
| 0.82613157257500 | 0.30641457697800 | 0.19685728401000 | T | T | T |
| 0.82613149354300 | 0.30641554266300 | 0.53019017286100 | T | T | T |
| 0.82613144762600 | 0.30641556480000 | 0.86352425889300 | T | T | T |
| 0.22086349787200 | 0.89248657425800 | 0.23504006176000 | T | T | T |
| 0.22086329738000 | 0.89248517306900 | 0.56837272036400 | T | T | T |
| 0.22086334633900 | 0.89248513233700 | 0.90170671011700 | T | T | T |
| 0.55419672397500 | 0.89248558740400 | 0.23503990744600 | T | T | T |
| 0.55419651454800 | 0.89248435494300 | 0.56837265691900 | T | T | T |

|                  |                  |                  |   |   |   |
|------------------|------------------|------------------|---|---|---|
| 0.55419661971000 | 0.89248439610400 | 0.90170655455300 | T | T | T |
| 0.88753079948700 | 0.89248631968900 | 0.23503992835000 | T | T | T |
| 0.88753050349000 | 0.89248498222700 | 0.56837263940700 | T | T | T |
| 0.88753050499000 | 0.89248494504900 | 0.90170660733600 | T | T | T |
| 0.16621015141700 | 0.88694059492200 | 0.22814127746900 | T | T | T |
| 0.16620998593400 | 0.88693922917300 | 0.56147418861400 | T | T | T |
| 0.16620998385600 | 0.88693909213600 | 0.89480819277900 | T | T | T |
| 0.49954315352200 | 0.88693948468400 | 0.22814114696800 | T | T | T |
| 0.49954303310200 | 0.88693830752100 | 0.56147417224400 | T | T | T |
| 0.49954306656100 | 0.88693829287700 | 0.89480809421300 | T | T | T |
| 0.83287720518900 | 0.88693992107700 | 0.22814117411900 | T | T | T |
| 0.83287700243900 | 0.88693867845100 | 0.56147416467700 | T | T | T |
| 0.83287696927200 | 0.88693861240000 | 0.89480811871800 | T | T | T |
| 0.15791043038800 | 0.91868058830900 | 0.27352106137400 | T | T | T |
| 0.15791028584700 | 0.91867877787600 | 0.60685437589500 | T | T | T |
| 0.15791033920900 | 0.91867900583100 | 0.94018832201300 | T | T | T |
| 0.49124352816000 | 0.91867950049300 | 0.27352116350900 | T | T | T |
| 0.49124339979300 | 0.91867790542900 | 0.60685455497400 | T | T | T |
| 0.49124346911700 | 0.91867818456400 | 0.94018832407600 | T | T | T |
| 0.82457756678300 | 0.91867977743800 | 0.27352108938800 | T | T | T |
| 0.82457734792800 | 0.91867814548400 | 0.60685447477000 | T | T | T |
| 0.82457738004100 | 0.91867841016300 | 0.94018829703200 | T | T | T |
| 0.15887405230000 | 0.95578673231900 | 0.19679740294300 | T | T | T |
| 0.15887398251900 | 0.95578560580600 | 0.53013014265500 | T | T | T |
| 0.15887399033900 | 0.95578542759600 | 0.86346430312800 | T | T | T |
| 0.49220699370200 | 0.95578546761300 | 0.19679741416800 | T | T | T |
| 0.49220696614700 | 0.95578454088400 | 0.53013027921000 | T | T | T |
| 0.49220703413000 | 0.95578461856000 | 0.86346433871700 | T | T | T |
| 0.82554122941700 | 0.95578592789800 | 0.19679736967300 | T | T | T |
| 0.82554112154100 | 0.95578492680200 | 0.53013020275900 | T | T | T |

|                  |                  |                  |   |   |   |
|------------------|------------------|------------------|---|---|---|
| 0.82554106021200 | 0.95578492610300 | 0.86346430314900 | T | T | T |
| 0.06135225362230 | 0.36289316885200 | 0.22936497890900 | T | T | T |
| 0.06135204142340 | 0.36289440583800 | 0.56269764882500 | T | T | T |
| 0.06135207158940 | 0.36289451060700 | 0.89603160576800 | T | T | T |
| 0.39468501433600 | 0.36289370292600 | 0.22936498636100 | T | T | T |
| 0.39468486978100 | 0.36289485735400 | 0.56269768701100 | T | T | T |
| 0.39468496797900 | 0.36289489283200 | 0.89603157763400 | T | T | T |
| 0.72801896021500 | 0.36289380362000 | 0.22936487314000 | T | T | T |
| 0.72801872835900 | 0.36289495293200 | 0.56269762707600 | T | T | T |
| 0.72801879266400 | 0.36289499382000 | 0.89603148034800 | T | T | T |
| 0.00795279551178 | 0.37484261263000 | 0.21981477917500 | T | T | T |
| 0.00795267721450 | 0.37484389457000 | 0.55314767005300 | T | T | T |
| 0.00795264591928 | 0.37484408472000 | 0.88648166733500 | T | T | T |
| 0.34128560909600 | 0.37484291699700 | 0.21981476194700 | T | T | T |
| 0.34128554758700 | 0.37484414740400 | 0.55314768016700 | T | T | T |
| 0.34128555778300 | 0.37484430318000 | 0.88648164740900 | T | T | T |
| 0.67461933051800 | 0.37484358593500 | 0.21981469420100 | T | T | T |
| 0.67461922618100 | 0.37484471903000 | 0.55314768339000 | T | T | T |
| 0.67461920842300 | 0.37484479997900 | 0.88648158746600 | T | T | T |
| 0.32895607670100 | 0.34665572409000 | 0.26543308829500 | T | T | T |
| 0.32895607449400 | 0.34665745217800 | 0.59876636654400 | T | T | T |
| 0.32895611633800 | 0.34665725609600 | 0.93210024260700 | T | T | T |
| 0.66228983295000 | 0.34665653128100 | 0.26543309425500 | T | T | T |
| 0.66228976095800 | 0.34665811149600 | 0.59876644771300 | T | T | T |
| 0.66228979001600 | 0.34665788514600 | 0.93210020027300 | T | T | T |
| 0.99562325828600 | 0.34665554983500 | 0.26543304014200 | T | T | T |
| 0.99562318528500 | 0.34665730389900 | 0.59876631112800 | T | T | T |
| 0.99562320317000 | 0.34665711983200 | 0.93210023108700 | T | T | T |
| 0.00046214433859 | 0.30684767745300 | 0.18892656645400 | T | T | T |
| 0.00046219595026 | 0.30684888246500 | 0.52225932369200 | T | T | T |

|                  |                  |                  |   |   |   |
|------------------|------------------|------------------|---|---|---|
| 0.00046220567914 | 0.30684913817300 | 0.85559354103700 | T | T | T |
| 0.33379489427400 | 0.30684796249900 | 0.18892657783700 | T | T | T |
| 0.33379499447800 | 0.30684911728600 | 0.52225936678600 | T | T | T |
| 0.33379507283400 | 0.30684932151400 | 0.85559355079700 | T | T | T |
| 0.66712872508100 | 0.30684894646100 | 0.18892663221400 | T | T | T |
| 0.66712878540900 | 0.30684998126100 | 0.52225949881400 | T | T | T |
| 0.66712880501800 | 0.30684997951800 | 0.85559360727600 | T | T | T |
| 0.06125500188550 | 0.89845379020500 | 0.22808389618700 | T | T | T |
| 0.06125479941490 | 0.89845245841200 | 0.56141651484300 | T | T | T |
| 0.06125480748550 | 0.89845237679100 | 0.89475050229200 | T | T | T |
| 0.39458767316700 | 0.89845313806500 | 0.22808390980500 | T | T | T |
| 0.39458754930400 | 0.89845189605300 | 0.56141656180900 | T | T | T |
| 0.39458764913600 | 0.89845191407700 | 0.89475047444800 | T | T | T |
| 0.72792173231800 | 0.89845293236700 | 0.22808376243700 | T | T | T |
| 0.72792150421300 | 0.89845171561100 | 0.56141647820000 | T | T | T |
| 0.72792155444700 | 0.89845173933000 | 0.89475035541000 | T | T | T |
| 0.00771012073475 | 0.88646272955800 | 0.21944691706400 | T | T | T |
| 0.00771000542623 | 0.88646131493900 | 0.55277975195200 | T | T | T |
| 0.00770996343546 | 0.88646111707100 | 0.88611375750200 | T | T | T |
| 0.34104285785800 | 0.88646235322800 | 0.21944689144800 | T | T | T |
| 0.34104281067700 | 0.88646099363500 | 0.55277975919300 | T | T | T |
| 0.34104282342700 | 0.88646084717800 | 0.88611373351600 | T | T | T |
| 0.67437664870200 | 0.88646145053700 | 0.21944679030100 | T | T | T |
| 0.67437655109000 | 0.88646022383300 | 0.55277974380800 | T | T | T |
| 0.67437652587500 | 0.88646020008600 | 0.88611365757900 | T | T | T |
| 0.32831785873900 | 0.91373008260400 | 0.26531330997400 | T | T | T |
| 0.32831787123500 | 0.91372819413000 | 0.59864659718300 | T | T | T |
| 0.32831791901000 | 0.91372842423400 | 0.93198049642700 | T | T | T |
| 0.66165169386500 | 0.91372900588400 | 0.26531337588100 | T | T | T |
| 0.66165162448000 | 0.91372731182500 | 0.59864674046400 | T | T | T |

|                  |                  |                  |   |   |   |
|------------------|------------------|------------------|---|---|---|
| 0.66165164748600 | 0.91372761974000 | 0.93198048054900 | T | T | T |
| 0.99498511050400 | 0.91373029547500 | 0.26531324078700 | T | T | T |
| 0.99498504311700 | 0.91372838194800 | 0.59864652115200 | T | T | T |
| 0.99498505597000 | 0.91372859172500 | 0.93198047230900 | T | T | T |
| 0.00039109370377 | 0.95417263173900 | 0.18862162590400 | T | T | T |
| 0.00039115392607 | 0.95417131724800 | 0.52195427716100 | T | T | T |
| 0.00039114921938 | 0.95417106321800 | 0.85528852203800 | T | T | T |
| 0.33372377186500 | 0.95417228664900 | 0.18862162419100 | T | T | T |
| 0.33372388922400 | 0.95417103109000 | 0.52195431529100 | T | T | T |
| 0.33372396640300 | 0.95417083991100 | 0.85528852801100 | T | T | T |
| 0.66705769442700 | 0.95417106373400 | 0.18862158450800 | T | T | T |
| 0.66705776184300 | 0.95416996624100 | 0.52195437816500 | T | T | T |
| 0.66705776545900 | 0.95417004767700 | 0.85528854333100 | T | T | T |
| 0.20851581764400 | 0.31805896795900 | 0.17643256449800 | T | T | T |
| 0.20851560410100 | 0.31806012879100 | 0.50976537237200 | T | T | T |
| 0.20851558000400 | 0.31806040113500 | 0.84309958966500 | T | T | T |
| 0.54184904264000 | 0.31806025710600 | 0.17643254249800 | T | T | T |
| 0.54184882763200 | 0.31806127944600 | 0.50976552664900 | T | T | T |
| 0.54184882084200 | 0.31806126951200 | 0.84309963740100 | T | T | T |
| 0.87518315644400 | 0.31805948401200 | 0.17643253968200 | T | T | T |
| 0.87518289377100 | 0.31806059027500 | 0.50976541985700 | T | T | T |
| 0.87518274559600 | 0.31806075130300 | 0.84309961284100 | T | T | T |
| 0.23435077275500 | 0.33559795911300 | 0.14003977199000 | T | T | T |
| 0.23435076347000 | 0.33559842777000 | 0.47337203751200 | T | T | T |
| 0.23435089659900 | 0.33559883008000 | 0.80670590079700 | T | T | T |
| 0.56768416262700 | 0.33559889876700 | 0.14003953534600 | T | T | T |
| 0.56768414002800 | 0.33559925896500 | 0.47337195485200 | T | T | T |
| 0.56768429996000 | 0.33559945908700 | 0.80670576507100 | T | T | T |
| 0.90101808128500 | 0.33559821891600 | 0.14003968177300 | T | T | T |
| 0.90101804007600 | 0.33559864919800 | 0.47337201165300 | T | T | T |

|                  |                  |                  |   |   |   |
|------------------|------------------|------------------|---|---|---|
| 0.90101805507300 | 0.33559899710100 | 0.80670585916700 | T | T | T |
| 0.20756372248600 | 0.94280874802300 | 0.17605453147600 | T | T | T |
| 0.20756348210500 | 0.94280751055300 | 0.50938722113700 | T | T | T |
| 0.20756346890500 | 0.94280722626700 | 0.84272143741200 | T | T | T |
| 0.54089684318800 | 0.94280723999200 | 0.17605439107400 | T | T | T |
| 0.54089661586200 | 0.94280617283800 | 0.50938730177900 | T | T | T |
| 0.54089663875600 | 0.94280622146500 | 0.84272144423500 | T | T | T |
| 0.87423116022000 | 0.94280818629600 | 0.17605447402100 | T | T | T |
| 0.87423086579600 | 0.94280701568400 | 0.50938724457100 | T | T | T |
| 0.87423069954400 | 0.94280685540800 | 0.84272144614100 | T | T | T |
| 0.23436282671000 | 0.92708092819900 | 0.14001111876400 | T | T | T |
| 0.23436282426700 | 0.92708041068400 | 0.47334329112900 | T | T | T |
| 0.23436295945700 | 0.92708003390800 | 0.80667718021200 | T | T | T |
| 0.56769620874700 | 0.92707982508800 | 0.14001076755600 | T | T | T |
| 0.56769619542800 | 0.92707944163400 | 0.47334313598100 | T | T | T |
| 0.56769635873900 | 0.92707930361600 | 0.80667699377200 | T | T | T |
| 0.90103022907400 | 0.92708065324700 | 0.14001099994400 | T | T | T |
| 0.90103019243500 | 0.92708018330900 | 0.47334324970500 | T | T | T |
| 0.90103018666400 | 0.92707986951400 | 0.80667712841600 | T | T | T |
| 0.21757159547900 | 0.30686194080800 | 0.15377640136800 | T | T | T |
| 0.21757161163300 | 0.30686232703200 | 0.48710893795100 | T | T | T |
| 0.21757163273900 | 0.30686239399300 | 0.82044272178300 | T | T | T |
| 0.55090484133500 | 0.30686283941900 | 0.15377638662900 | T | T | T |
| 0.55090484642200 | 0.30686317840100 | 0.48710907289200 | T | T | T |
| 0.55090492115900 | 0.30686294716900 | 0.82044270906300 | T | T | T |
| 0.88423875056900 | 0.30686229817400 | 0.15377634183800 | T | T | T |
| 0.88423873063400 | 0.30686268610800 | 0.48710895857600 | T | T | T |
| 0.88423866448800 | 0.30686263545900 | 0.82044269211700 | T | T | T |
| 0.21728347703400 | 0.95523071926000 | 0.15386646429700 | T | T | T |
| 0.21728349412700 | 0.95523033094600 | 0.48719892018400 | T | T | T |

|                  |                  |                  |   |   |   |
|------------------|------------------|------------------|---|---|---|
| 0.21728351145000 | 0.95523023311900 | 0.82053275358800 | T | T | T |
| 0.55061668197400 | 0.95522973462000 | 0.15386636715200 | T | T | T |
| 0.55061668935600 | 0.95522940302600 | 0.48719900975700 | T | T | T |
| 0.55061677370000 | 0.95522963380800 | 0.82053270978900 | T | T | T |
| 0.88395070994500 | 0.95523035801900 | 0.15386637160200 | T | T | T |
| 0.88395068601100 | 0.95522997043700 | 0.48719891844300 | T | T | T |
| 0.88395059748000 | 0.95522999752000 | 0.82053270722800 | T | T | T |

**8) Large supercell 2-H<sub>sol</sub><sup>+</sup> FS**

POSCAR

1

|                   |                   |                   |
|-------------------|-------------------|-------------------|
| 46.81727999995964 | 0.00000000000000  | 0.00000000000000  |
| 0.00000000000000  | 30.38812199999634 | 0.00000000000000  |
| 0.00000000000000  | 0.00000000000000  | 49.65722999997833 |

Ga P H O C

540 540 342 180 18

Direct

|                  |                  |                  |   |   |   |
|------------------|------------------|------------------|---|---|---|
| 0.00055274276051 | 0.01584105970940 | 0.00887007103833 | T | T | T |
| 0.00071230218419 | 0.01591354965850 | 0.34227486868200 | T | T | T |
| 0.00063797283261 | 0.01598955574740 | 0.67566587458500 | T | T | T |
| 0.33392830780400 | 0.01592867900240 | 0.00891255383505 | T | T | T |
| 0.33390533431200 | 0.01563379151160 | 0.34115240791700 | T | T | T |
| 0.33397557204300 | 0.01595029354200 | 0.67558641716900 | T | T | T |
| 0.66730308284700 | 0.01597321769350 | 0.00897090842094 | T | T | T |
| 0.66729336151500 | 0.01592588547690 | 0.34226940576300 | T | T | T |
| 0.66730213650600 | 0.01600076432660 | 0.67564253247700 | T | T | T |
| 0.33215964369900 | 0.01501606072450 | 0.22581727213200 | T | T | T |
| 0.33214390401900 | 0.01507761782130 | 0.55943402585400 | T | T | T |
| 0.33213016819700 | 0.01495876773160 | 0.89276458564100 | T | T | T |
| 0.66547616368000 | 0.01501877871860 | 0.22605349653500 | T | T | T |



|                  |                  |                  |   |   |   |
|------------------|------------------|------------------|---|---|---|
| 0.66547831468100 | 0.01506580165860 | 0.55943754349500 | T | T | T |
| 0.66546611581100 | 0.01500331053320 | 0.89275017780900 | T | T | T |
| 0.99908632176000 | 0.01492503297610 | 0.22613637079900 | T | T | T |
| 0.99881907314800 | 0.01505384466890 | 0.55941524276700 | T | T | T |
| 0.99877744685300 | 0.01505868692340 | 0.89278742746000 | T | T | T |
| 0.00144742251381 | 0.01603955245470 | 0.11762542852600 | T | T | T |
| 0.00121269339999 | 0.01861802553770 | 0.45106283391800 | T | T | T |
| 0.00121701389190 | 0.01893345577820 | 0.78439034273600 | T | T | T |
| 0.33403364051100 | 0.01587108710650 | 0.11784661703000 | T | T | T |
| 0.33452767164700 | 0.01641860865000 | 0.45095775869500 | T | T | T |
| 0.33454087136300 | 0.01633097785560 | 0.78425700806700 | T | T | T |
| 0.66786220520600 | 0.01854059835470 | 0.11777520883800 | T | T | T |
| 0.66786105470300 | 0.01703489154150 | 0.45098674662300 | T | T | T |
| 0.66785924479300 | 0.01649121661010 | 0.78429293853000 | T | T | T |
| 0.16647225208900 | 0.01571460330760 | 0.00901855494089 | T | T | T |
| 0.16653497181600 | 0.01538648786550 | 0.34088393085700 | T | T | T |
| 0.16620337500500 | 0.01565054440260 | 0.67570963946900 | T | T | T |
| 0.49959427193800 | 0.01562456065010 | 0.00900242987232 | T | T | T |
| 0.49957014392300 | 0.01564307963940 | 0.34236498885100 | T | T | T |
| 0.49964365877100 | 0.01565304564120 | 0.67571719792400 | T | T | T |
| 0.83293230757400 | 0.01561731176570 | 0.00900715805794 | T | T | T |
| 0.83291584726400 | 0.01560439911770 | 0.34237205737400 | T | T | T |
| 0.83290722583200 | 0.01565036908280 | 0.67571817287300 | T | T | T |
| 0.16575581107900 | 0.00852331047816 | 0.22561937810300 | T | T | T |
| 0.16370767076900 | 0.01212204949350 | 0.55902893725200 | T | T | T |
| 0.16373121211200 | 0.01213018581610 | 0.89235587979000 | T | T | T |
| 0.49708097767700 | 0.01215937616640 | 0.22568362759000 | T | T | T |
| 0.49703885751900 | 0.01212899157650 | 0.55904081940900 | T | T | T |
| 0.49704431330000 | 0.01213762306930 | 0.89238799975200 | T | T | T |
| 0.83039162745600 | 0.01210916075650 | 0.22567519548000 | T | T | T |

|                  |                  |                  |   |   |   |
|------------------|------------------|------------------|---|---|---|
| 0.83037068998000 | 0.01212937727300 | 0.55904138942500 | T | T | T |
| 0.83041240531600 | 0.01212576565320 | 0.89238498843300 | T | T | T |
| 0.16730161600400 | 0.01553582491950 | 0.11889389306400 | T | T | T |
| 0.16327300500000 | 0.98084001935200 | 0.43614982488400 | T | T | T |
| 0.16326342063200 | 0.98085097186700 | 0.76951936258100 | T | T | T |
| 0.49661328385500 | 0.98086902828100 | 0.10284083111100 | T | T | T |
| 0.49662363743100 | 0.98083931550500 | 0.43616353696200 | T | T | T |
| 0.49662122651200 | 0.98084877085000 | 0.76950389486300 | T | T | T |
| 0.82998156364000 | 0.98088142459600 | 0.10287333443000 | T | T | T |
| 0.82996065651900 | 0.98082970525400 | 0.43617938082700 | T | T | T |
| 0.82995278179400 | 0.98084507741900 | 0.76951303935300 | T | T | T |
| 0.08341107994840 | 0.01580173075140 | 0.00878114555962 | T | T | T |
| 0.08365269936090 | 0.01583462855710 | 0.34196024377900 | T | T | T |
| 0.08354537499760 | 0.01590509974140 | 0.67568477770200 | T | T | T |
| 0.41686673603400 | 0.01587019413790 | 0.00897693209288 | T | T | T |
| 0.41687513841600 | 0.01579549385030 | 0.34229185935200 | T | T | T |
| 0.41690751458900 | 0.01590362515400 | 0.67566036200000 | T | T | T |
| 0.75021880158800 | 0.01588303355710 | 0.00899541003523 | T | T | T |
| 0.75023805069200 | 0.01584944027640 | 0.34232726233100 | T | T | T |
| 0.75021804072800 | 0.01591976354210 | 0.67568315234200 | T | T | T |
| 0.08341663946700 | 0.01846537437650 | 0.22986077269400 | T | T | T |
| 0.08146037875800 | 0.01877555192870 | 0.56162965877900 | T | T | T |
| 0.08146170889990 | 0.01861353612950 | 0.89492256597500 | T | T | T |
| 0.41490401682500 | 0.01864700296160 | 0.22814678005600 | T | T | T |
| 0.41478932723600 | 0.01882081140870 | 0.56164376361900 | T | T | T |
| 0.41477198915900 | 0.01858678516180 | 0.89490582124200 | T | T | T |
| 0.74812731470200 | 0.01873692250730 | 0.22824897312200 | T | T | T |
| 0.74811934188900 | 0.01880664118580 | 0.56164713451400 | T | T | T |
| 0.74812585212600 | 0.01865322529310 | 0.89491552790600 | T | T | T |
| 0.08505235904790 | 0.01537054542650 | 0.11960436182600 | T | T | T |

|                  |                  |                  |   |   |   |
|------------------|------------------|------------------|---|---|---|
| 0.08523419033790 | 0.01503828194870 | 0.45452521061300 | T | T | T |
| 0.08519978912210 | 0.01505257940620 | 0.78803518098600 | T | T | T |
| 0.41846762648100 | 0.01454948305140 | 0.11996726943500 | T | T | T |
| 0.41856656998900 | 0.01497494665120 | 0.45468579574700 | T | T | T |
| 0.41859540542600 | 0.01486069748360 | 0.78779557848400 | T | T | T |
| 0.75188735576700 | 0.01502066310490 | 0.12134951740400 | T | T | T |
| 0.75190211155400 | 0.01493416076870 | 0.45472355550600 | T | T | T |
| 0.75191574971100 | 0.01491727932050 | 0.78791346867200 | T | T | T |
| 0.25004752340300 | 0.01582191778920 | 0.00749297814171 | T | T | T |
| 0.24981343132300 | 0.01577834185640 | 0.34067169339900 | T | T | T |
| 0.24985451653700 | 0.01590483410230 | 0.67424041605400 | T | T | T |
| 0.58319575670600 | 0.01588080219150 | 0.00756661215868 | T | T | T |
| 0.58318733631600 | 0.01589632161150 | 0.34090078549900 | T | T | T |
| 0.58320662570700 | 0.01592288844100 | 0.67425532705000 | T | T | T |
| 0.91653039725100 | 0.01584038911840 | 0.00753833190673 | T | T | T |
| 0.91654916423000 | 0.01585252093530 | 0.34089934969200 | T | T | T |
| 0.91653000074200 | 0.01589145984440 | 0.67424724412200 | T | T | T |
| 0.24790400729100 | 0.01119085156630 | 0.22591841676600 | T | T | T |
| 0.24803120588800 | 0.01589677755880 | 0.56305749661400 | T | T | T |
| 0.24804854478100 | 0.01536343934350 | 0.89500762571300 | T | T | T |
| 0.58136843136500 | 0.01586602157820 | 0.22968066449300 | T | T | T |
| 0.58136305540000 | 0.01588028717140 | 0.56305341402000 | T | T | T |
| 0.58135565724000 | 0.01562382832710 | 0.89568578668400 | T | T | T |
| 0.91478116000700 | 0.01576274842240 | 0.22975049004100 | T | T | T |
| 0.91469593102600 | 0.01585892397310 | 0.56301171867500 | T | T | T |
| 0.91468882346200 | 0.01536644171050 | 0.89489398954800 | T | T | T |
| 0.24992901990000 | 0.01581321206370 | 0.11768146579100 | T | T | T |
| 0.25400315671100 | 0.01858500051810 | 0.44918542666900 | T | T | T |
| 0.25401486374900 | 0.01853175040580 | 0.78247469350100 | T | T | T |
| 0.58737525002300 | 0.01866658880700 | 0.11586478109800 | T | T | T |

|                  |                  |                  |   |   |   |
|------------------|------------------|------------------|---|---|---|
| 0.58735416800000 | 0.01870576495940 | 0.44921690059500 | T | T | T |
| 0.58734689533700 | 0.01867683600390 | 0.78253296944300 | T | T | T |
| 0.92096525891300 | 0.01822036063080 | 0.11585561661700 | T | T | T |
| 0.92072079767600 | 0.01873332006070 | 0.44921320544000 | T | T | T |
| 0.92073902776600 | 0.01870855821430 | 0.78253578908900 | T | T | T |
| 0.12540140352000 | 0.06406515176650 | 0.05498439473470 | T | T | T |
| 0.12740383488000 | 0.06450182566700 | 0.38895561208000 | T | T | T |
| 0.12729654874800 | 0.06456257088850 | 0.72252134566200 | T | T | T |
| 0.46076508587100 | 0.06458720365840 | 0.05565105415060 | T | T | T |
| 0.46063760977200 | 0.06456173576510 | 0.38919579452900 | T | T | T |
| 0.46067635528600 | 0.06456671856580 | 0.72250968983700 | T | T | T |
| 0.79397995127900 | 0.06457023748130 | 0.05582276826090 | T | T | T |
| 0.79395952410400 | 0.06461317437140 | 0.38943940100400 | T | T | T |
| 0.79397937079300 | 0.06457519969980 | 0.72258702208000 | T | T | T |
| 0.12515809423000 | 0.06431057474420 | 0.27749180184500 | T | T | T |
| 0.12491598169100 | 0.06476782669150 | 0.61112428398100 | T | T | T |
| 0.12501781008000 | 0.06476243394300 | 0.94443671229800 | T | T | T |
| 0.45834775387800 | 0.06483485520100 | 0.27780845429600 | T | T | T |
| 0.45828212323900 | 0.06476008240920 | 0.61112267774700 | T | T | T |
| 0.45822701665300 | 0.06477839782630 | 0.94445121247000 | T | T | T |
| 0.79160121148000 | 0.06479711108920 | 0.27781414487000 | T | T | T |
| 0.79157467008000 | 0.06475982286500 | 0.61111929520800 | T | T | T |
| 0.79160350897500 | 0.06477335080930 | 0.94446667029700 | T | T | T |
| 0.12558122286900 | 0.06455558719900 | 0.16574956705800 | T | T | T |
| 0.12546473593800 | 0.06379053410950 | 0.49703125828000 | T | T | T |
| 0.12544943174000 | 0.06381188892150 | 0.83038796819900 | T | T | T |
| 0.45873844169500 | 0.06373279781600 | 0.16363487748000 | T | T | T |
| 0.45879049349600 | 0.06379618766170 | 0.49704245135600 | T | T | T |
| 0.45878631046200 | 0.06380108740210 | 0.83038740561900 | T | T | T |
| 0.79214335466200 | 0.06381418954000 | 0.16371229966200 | T | T | T |

|                  |                  |                  |   |   |   |
|------------------|------------------|------------------|---|---|---|
| 0.79212391122300 | 0.06380140263210 | 0.49705263445100 | T | T | T |
| 0.79212625847400 | 0.06381469260430 | 0.83039445030200 | T | T | T |
| 0.29207862965800 | 0.06380112249920 | 0.05374921215090 | T | T | T |
| 0.29227597932500 | 0.06406416344600 | 0.38696264035100 | T | T | T |
| 0.29223590154000 | 0.06405634174010 | 0.72026573754700 | T | T | T |
| 0.62551538115500 | 0.06403762439070 | 0.05347637522740 | T | T | T |
| 0.62555056759300 | 0.06403348096700 | 0.38686231698800 | T | T | T |
| 0.62556696964800 | 0.06402288712830 | 0.72019866830200 | T | T | T |
| 0.95889648465800 | 0.06402703692090 | 0.05357061830370 | T | T | T |
| 0.95884310927600 | 0.06402238499780 | 0.38678150841700 | T | T | T |
| 0.95882319701300 | 0.06402882890530 | 0.72009968920800 | T | T | T |
| 0.29153087113700 | 0.06390752322450 | 0.27642373365400 | T | T | T |
| 0.29193046893300 | 0.06409141824160 | 0.60982876842700 | T | T | T |
| 0.29189104015600 | 0.06402121393760 | 0.94307978632400 | T | T | T |
| 0.62524304645300 | 0.06409730040730 | 0.27649891699900 | T | T | T |
| 0.62526353422100 | 0.06408350263990 | 0.60982372168000 | T | T | T |
| 0.62524362936200 | 0.06407969574670 | 0.94317047520400 | T | T | T |
| 0.95861483957200 | 0.06410708383680 | 0.27655847570600 | T | T | T |
| 0.95860432564700 | 0.06409143006440 | 0.60985243167300 | T | T | T |
| 0.95855679236700 | 0.06402552654750 | 0.94308052028200 | T | T | T |
| 0.29058142024200 | 0.06489643891940 | 0.16560141624500 | T | T | T |
| 0.29182452985200 | 0.06451768182610 | 0.49877049404700 | T | T | T |
| 0.29194155802500 | 0.06457735214660 | 0.83211841004600 | T | T | T |
| 0.62513282328400 | 0.06455023798340 | 0.16543875279200 | T | T | T |
| 0.62515281580500 | 0.06452061418930 | 0.49876633681300 | T | T | T |
| 0.62520523649900 | 0.06454404856000 | 0.83208685119900 | T | T | T |
| 0.95858161327100 | 0.06449038077480 | 0.16542143225000 | T | T | T |
| 0.95847981417300 | 0.06453771596610 | 0.49877417075800 | T | T | T |
| 0.95858229971300 | 0.06460328586160 | 0.83206825675300 | T | T | T |
| 0.04266681725140 | 0.06409003567200 | 0.05490503916590 | T | T | T |

|                  |                  |                  |   |   |   |
|------------------|------------------|------------------|---|---|---|
| 0.04324913434300 | 0.06414867822180 | 0.38851263534700 | T | T | T |
| 0.04325912391970 | 0.06415998295100 | 0.72183883239600 | T | T | T |
| 0.37633118984400 | 0.06411386139250 | 0.05519098776010 | T | T | T |
| 0.37645734857700 | 0.06413006989120 | 0.38859679341200 | T | T | T |
| 0.37650108891400 | 0.06416256802290 | 0.72193131596300 | T | T | T |
| 0.70988930480700 | 0.06416168047730 | 0.05520369640760 | T | T | T |
| 0.70983931790000 | 0.06416647059670 | 0.38860171936900 | T | T | T |
| 0.70982194409300 | 0.06414698841330 | 0.72191588387700 | T | T | T |
| 0.04135524017760 | 0.06448955634220 | 0.27785265761600 | T | T | T |
| 0.04130132630910 | 0.06444146105750 | 0.61112186390300 | T | T | T |
| 0.04128934290350 | 0.06446285061290 | 0.94442498514200 | T | T | T |
| 0.37471596074200 | 0.06455208338360 | 0.27786921526100 | T | T | T |
| 0.37464716874400 | 0.06443915276420 | 0.61109443983600 | T | T | T |
| 0.37461052785000 | 0.06444498584570 | 0.94445575279500 | T | T | T |
| 0.70796390103800 | 0.06446347108820 | 0.27781233562900 | T | T | T |
| 0.70796179343600 | 0.06443382236030 | 0.61109563730200 | T | T | T |
| 0.70796707587900 | 0.06445765064390 | 0.94447699254600 | T | T | T |
| 0.04159174442180 | 0.06448525943710 | 0.16538992202900 | T | T | T |
| 0.04148415726250 | 0.06468907291090 | 0.49884779283200 | T | T | T |
| 0.04149818725170 | 0.06473246722990 | 0.83221744675400 | T | T | T |
| 0.37463474694800 | 0.06468997359430 | 0.16552483369700 | T | T | T |
| 0.37477502105800 | 0.06463863264900 | 0.49881380613800 | T | T | T |
| 0.37481138950400 | 0.06467899024160 | 0.83220371588700 | T | T | T |
| 0.70812264908000 | 0.06469740202940 | 0.16551660569300 | T | T | T |
| 0.70811665735500 | 0.06466576383830 | 0.49883387831800 | T | T | T |
| 0.70811962336600 | 0.06467701132920 | 0.83218514719800 | T | T | T |
| 0.20825468628000 | 0.06401900599910 | 0.05469775705530 | T | T | T |
| 0.20578285589000 | 0.06426245067670 | 0.38848103046800 | T | T | T |
| 0.20581353165700 | 0.06428578755900 | 0.72187005589700 | T | T | T |
| 0.53917045927500 | 0.06429698575160 | 0.05519000440620 | T | T | T |

|                   |                  |                   |   |   |   |
|-------------------|------------------|-------------------|---|---|---|
| 0.53915466600800  | 0.06427255404530 | 0.38850892353500  | T | T | T |
| 0.53916853262300  | 0.06428032148310 | 0.72185682962800  | T | T | T |
| 0.87253831982100  | 0.06428289990430 | 0.05521410453910  | T | T | T |
| 0.87250471355400  | 0.06428386837650 | 0.38852840731500  | T | T | T |
| 0.87250614035700  | 0.06428273718560 | 0.72187250496100  | T | T | T |
| 0.20801612770700  | 0.06404716154930 | 0.27640599251200  | T | T | T |
| 0.20783170984900  | 0.06424132583770 | 0.61102698327100  | T | T | T |
| 0.20788788806900  | 0.06416580380680 | 0.94417709335500  | T | T | T |
| 0.54118884830800  | 0.06423217817300 | 0.27763594755400  | T | T | T |
| 0.54117652806700  | 0.06424307509090 | 0.61102257858900  | T | T | T |
| 0.54118119634900  | 0.06422781052450 | 0.94433218989300  | T | T | T |
| 0.87450900084500  | 0.06426463919620 | 0.27772938971600  | T | T | T |
| 0.87450219795800  | 0.06424415948220 | 0.61104064275900  | T | T | T |
| 0.87454650303600  | 0.06418490467080 | 0.94426806446600  | T | T | T |
| 0.20773081956600  | 0.06476153976940 | 0.16576230269200  | T | T | T |
| 0.20796764321000  | 0.06675868529850 | 0.50057510021700  | T | T | T |
| 0.20787174498600  | 0.06679421263970 | 0.83380174511000  | T | T | T |
| 0.54129490928100  | 0.06673934152420 | 0.16720537838400  | T | T | T |
| 0.54129347301100  | 0.06672552804970 | 0.50055928830400  | T | T | T |
| 0.54124964521700  | 0.06673553461180 | 0.83383667366100  | T | T | T |
| 0.87466345462100  | 0.06676467074530 | 0.16726339225600  | T | T | T |
| 0.87461751205100  | 0.06672935637710 | 0.50054627895600  | T | T | T |
| 0.87453280198700  | 0.06678253940080 | 0.83377133356000  | T | T | T |
| 0.00000000000000  | 0.13043999673400 | 0.00000000000000  | F | F | F |
| 0.00000000000000  | 0.13043999673400 | 0.333333333333400 | F | F | F |
| 0.00000000000000  | 0.13043999673400 | 0.666666666666600 | F | F | F |
| 0.333333333333400 | 0.13043999673400 | 0.000000000000000 | F | F | F |
| 0.333333333333400 | 0.13043999673400 | 0.333333333333400 | F | F | F |
| 0.333333333333400 | 0.13043999673400 | 0.666666666666600 | F | F | F |
| 0.666666666666600 | 0.13043999673400 | 0.000000000000000 | F | F | F |

|                   |                  |                   |   |   |   |
|-------------------|------------------|-------------------|---|---|---|
| 0.666666666666600 | 0.13043999673400 | 0.333333333333400 | F | F | F |
| 0.666666666666600 | 0.13043999673400 | 0.666666666666600 | F | F | F |
| 0.000000000000000 | 0.13043999673400 | 0.22222334138000  | F | F | F |
| 0.000000000000000 | 0.13043999673400 | 0.55555667471300  | F | F | F |
| 0.000000000000000 | 0.13043999673400 | 0.88889000804700  | F | F | F |
| 0.333333333333400 | 0.13043999673400 | 0.22222334138000  | F | F | F |
| 0.333333333333400 | 0.13043999673400 | 0.55555667471300  | F | F | F |
| 0.333333333333400 | 0.13043999673400 | 0.88889000804700  | F | F | F |
| 0.666666666666600 | 0.13043999673400 | 0.22222334138000  | F | F | F |
| 0.666666666666600 | 0.13043999673400 | 0.55555667471300  | F | F | F |
| 0.666666666666600 | 0.13043999673400 | 0.88889000804700  | F | F | F |
| 0.000000000000000 | 0.13043999673400 | 0.11111000180100  | F | F | F |
| 0.000000000000000 | 0.13043999673400 | 0.44444333513300  | F | F | F |
| 0.000000000000000 | 0.13043999673400 | 0.77777666846700  | F | F | F |
| 0.333333333333400 | 0.13043999673400 | 0.11111000180100  | F | F | F |
| 0.333333333333400 | 0.13043999673400 | 0.44444333513300  | F | F | F |
| 0.333333333333400 | 0.13043999673400 | 0.77777666846700  | F | F | F |
| 0.666666666666600 | 0.13043999673400 | 0.11111000180100  | F | F | F |
| 0.666666666666600 | 0.13043999673400 | 0.44444333513300  | F | F | F |
| 0.666666666666600 | 0.13043999673400 | 0.77777666846700  | F | F | F |
| 0.16666666667500  | 0.13043999673400 | 0.000000000000000 | F | F | F |
| 0.16666666667500  | 0.13043999673400 | 0.333333333333400 | F | F | F |
| 0.16666666667500  | 0.13043999673400 | 0.666666666666600 | F | F | F |
| 0.50000000000900  | 0.13043999673400 | 0.000000000000000 | F | F | F |
| 0.50000000000900  | 0.13043999673400 | 0.333333333333400 | F | F | F |
| 0.50000000000900  | 0.13043999673400 | 0.666666666666600 | F | F | F |
| 0.83333333334100  | 0.13043999673400 | 0.000000000000000 | F | F | F |
| 0.83333333334100  | 0.13043999673400 | 0.333333333333400 | F | F | F |
| 0.83333333334100  | 0.13043999673400 | 0.666666666666600 | F | F | F |
| 0.16666666667500  | 0.13043999673400 | 0.22222334138000  | F | F | F |



|                  |                  |                  |   |   |   |
|------------------|------------------|------------------|---|---|---|
| 0.16666666667500 | 0.13043999673400 | 0.55555667471300 | F | F | F |
| 0.16666666667500 | 0.13043999673400 | 0.88889000804700 | F | F | F |
| 0.50000000000900 | 0.13043999673400 | 0.22222334138000 | F | F | F |
| 0.50000000000900 | 0.13043999673400 | 0.55555667471300 | F | F | F |
| 0.50000000000900 | 0.13043999673400 | 0.88889000804700 | F | F | F |
| 0.83333333334100 | 0.13043999673400 | 0.22222334138000 | F | F | F |
| 0.83333333334100 | 0.13043999673400 | 0.55555667471300 | F | F | F |
| 0.83333333334100 | 0.13043999673400 | 0.88889000804700 | F | F | F |
| 0.16666666667500 | 0.13043999673400 | 0.11111000180100 | F | F | F |
| 0.16666666667500 | 0.13043999673400 | 0.44444333513300 | F | F | F |
| 0.16666666667500 | 0.13043999673400 | 0.77777666846700 | F | F | F |
| 0.50000000000900 | 0.13043999673400 | 0.11111000180100 | F | F | F |
| 0.50000000000900 | 0.13043999673400 | 0.44444333513300 | F | F | F |
| 0.50000000000900 | 0.13043999673400 | 0.77777666846700 | F | F | F |
| 0.83333333334100 | 0.13043999673400 | 0.11111000180100 | F | F | F |
| 0.83333333334100 | 0.13043999673400 | 0.44444333513300 | F | F | F |
| 0.83333333334100 | 0.13043999673400 | 0.77777666846700 | F | F | F |
| 0.08333333332670 | 0.13043999673400 | 0.00000000000000 | F | F | F |
| 0.08333333332670 | 0.13043999673400 | 0.33333333333400 | F | F | F |
| 0.08333333332670 | 0.13043999673400 | 0.66666666666600 | F | F | F |
| 0.41666666666100 | 0.13043999673400 | 0.00000000000000 | F | F | F |
| 0.41666666666100 | 0.13043999673400 | 0.33333333333400 | F | F | F |
| 0.41666666666100 | 0.13043999673400 | 0.66666666666600 | F | F | F |
| 0.74999999999300 | 0.13043999673400 | 0.00000000000000 | F | F | F |
| 0.74999999999300 | 0.13043999673400 | 0.33333333333400 | F | F | F |
| 0.74999999999300 | 0.13043999673400 | 0.66666666666600 | F | F | F |
| 0.08333333332670 | 0.13043999673400 | 0.22222334138000 | F | F | F |
| 0.08333333332670 | 0.13043999673400 | 0.55555667471300 | F | F | F |
| 0.08333333332670 | 0.13043999673400 | 0.88889000804700 | F | F | F |
| 0.41666666666100 | 0.13043999673400 | 0.22222334138000 | F | F | F |

|                  |                  |                  |   |   |   |
|------------------|------------------|------------------|---|---|---|
| 0.41666666666100 | 0.13043999673400 | 0.55555667471300 | F | F | F |
| 0.41666666666100 | 0.13043999673400 | 0.88889000804700 | F | F | F |
| 0.74999999999300 | 0.13043999673400 | 0.22222334138000 | F | F | F |
| 0.74999999999300 | 0.13043999673400 | 0.55555667471300 | F | F | F |
| 0.74999999999300 | 0.13043999673400 | 0.88889000804700 | F | F | F |
| 0.08333333332670 | 0.13043999673400 | 0.11111000180100 | F | F | F |
| 0.08333333332670 | 0.13043999673400 | 0.44444333513300 | F | F | F |
| 0.08333333332670 | 0.13043999673400 | 0.77777666846700 | F | F | F |
| 0.41666666666100 | 0.13043999673400 | 0.11111000180100 | F | F | F |
| 0.41666666666100 | 0.13043999673400 | 0.44444333513300 | F | F | F |
| 0.41666666666100 | 0.13043999673400 | 0.77777666846700 | F | F | F |
| 0.74999999999300 | 0.13043999673400 | 0.11111000180100 | F | F | F |
| 0.74999999999300 | 0.13043999673400 | 0.44444333513300 | F | F | F |
| 0.74999999999300 | 0.13043999673400 | 0.77777666846700 | F | F | F |
| 0.25000000008900 | 0.13043999673400 | 0.00000000000000 | F | F | F |
| 0.25000000008900 | 0.13043999673400 | 0.33333333333400 | F | F | F |
| 0.25000000008900 | 0.13043999673400 | 0.66666666666600 | F | F | F |
| 0.58333333342100 | 0.13043999673400 | 0.00000000000000 | F | F | F |
| 0.58333333342100 | 0.13043999673400 | 0.33333333333400 | F | F | F |
| 0.58333333342100 | 0.13043999673400 | 0.66666666666600 | F | F | F |
| 0.91666666675500 | 0.13043999673400 | 0.00000000000000 | F | F | F |
| 0.91666666675500 | 0.13043999673400 | 0.33333333333400 | F | F | F |
| 0.91666666675500 | 0.13043999673400 | 0.66666666666600 | F | F | F |
| 0.25000000008900 | 0.13043999673400 | 0.22222334138000 | F | F | F |
| 0.25000000008900 | 0.13043999673400 | 0.55555667471300 | F | F | F |
| 0.25000000008900 | 0.13043999673400 | 0.88889000804700 | F | F | F |
| 0.58333333342100 | 0.13043999673400 | 0.22222334138000 | F | F | F |
| 0.58333333342100 | 0.13043999673400 | 0.55555667471300 | F | F | F |
| 0.58333333342100 | 0.13043999673400 | 0.88889000804700 | F | F | F |
| 0.91666666675500 | 0.13043999673400 | 0.22222334138000 | F | F | F |

|                  |                  |                  |   |   |   |
|------------------|------------------|------------------|---|---|---|
| 0.91666666675500 | 0.13043999673400 | 0.55555667471300 | F | F | F |
| 0.91666666675500 | 0.13043999673400 | 0.88889000804700 | F | F | F |
| 0.25000000008900 | 0.13043999673400 | 0.11111000180100 | F | F | F |
| 0.25000000008900 | 0.13043999673400 | 0.44444333513300 | F | F | F |
| 0.25000000008900 | 0.13043999673400 | 0.77777666846700 | F | F | F |
| 0.5833333342100  | 0.13043999673400 | 0.11111000180100 | F | F | F |
| 0.5833333342100  | 0.13043999673400 | 0.44444333513300 | F | F | F |
| 0.5833333342100  | 0.13043999673400 | 0.77777666846700 | F | F | F |
| 0.91666666675500 | 0.13043999673400 | 0.11111000180100 | F | F | F |
| 0.91666666675500 | 0.13043999673400 | 0.44444333513300 | F | F | F |
| 0.91666666675500 | 0.13043999673400 | 0.77777666846700 | F | F | F |
| 0.12528905469300 | 0.19660924664700 | 0.05502052532300 | T | T | T |
| 0.12632046238000 | 0.19600062578100 | 0.38982881868600 | T | T | T |
| 0.12608896223400 | 0.19588316601300 | 0.72349757123900 | T | T | T |
| 0.45943951025800 | 0.19586996058200 | 0.05682278915480 | T | T | T |
| 0.45944038471500 | 0.19587936415700 | 0.39015166964800 | T | T | T |
| 0.45946932269800 | 0.19587038712800 | 0.72350908438200 | T | T | T |
| 0.79277744596700 | 0.19587131354800 | 0.05680981068170 | T | T | T |
| 0.79277679797400 | 0.19586339781400 | 0.39018357005600 | T | T | T |
| 0.79277903630200 | 0.19587169538400 | 0.72351936395400 | T | T | T |
| 0.12509493541600 | 0.19649018233900 | 0.27649292994800 | T | T | T |
| 0.12510007999300 | 0.19590516619900 | 0.61109266940100 | T | T | T |
| 0.12519257542800 | 0.19589669181400 | 0.94434583671400 | T | T | T |
| 0.45846695214800 | 0.19587247249000 | 0.27777993846000 | T | T | T |
| 0.45843946287200 | 0.19590247838000 | 0.61109298237100 | T | T | T |
| 0.45840882907500 | 0.19589331914300 | 0.94442729483200 | T | T | T |
| 0.79176378049900 | 0.19587895385700 | 0.27778563586000 | T | T | T |
| 0.79175198594600 | 0.19590466169000 | 0.61109254994300 | T | T | T |
| 0.79176208779100 | 0.19590160675100 | 0.94443084964800 | T | T | T |
| 0.12556897169200 | 0.19615093900900 | 0.16575558438700 | T | T | T |

|                  |                  |                  |   |   |   |
|------------------|------------------|------------------|---|---|---|
| 0.12547045500100 | 0.19831585137100 | 0.49691608270800 | T | T | T |
| 0.12545667247900 | 0.19828740286100 | 0.83027571829500 | T | T | T |
| 0.45879247689700 | 0.19812286533700 | 0.16361364060900 | T | T | T |
| 0.45879728168900 | 0.19834605814300 | 0.49691478097900 | T | T | T |
| 0.45879607857200 | 0.19830201194700 | 0.83027958269500 | T | T | T |
| 0.79214610127000 | 0.19820102485600 | 0.16359385489800 | T | T | T |
| 0.79213293116400 | 0.19833924933300 | 0.49692385732500 | T | T | T |
| 0.79213666777300 | 0.19829990265300 | 0.83028163253900 | T | T | T |
| 0.29205949973200 | 0.19658702424900 | 0.05475976619980 | T | T | T |
| 0.29213255028400 | 0.19631726636700 | 0.38801454667600 | T | T | T |
| 0.29215995692000 | 0.19626574529400 | 0.72141752058800 | T | T | T |
| 0.62549575306300 | 0.19629258225800 | 0.05466962389750 | T | T | T |
| 0.62549821042500 | 0.19629722020000 | 0.38801352159700 | T | T | T |
| 0.62549165099500 | 0.19630607143100 | 0.72131795628100 | T | T | T |
| 0.95885994528200 | 0.19629622233600 | 0.05471516368480 | T | T | T |
| 0.95883932294800 | 0.19630027666600 | 0.38801214669200 | T | T | T |
| 0.95884118519600 | 0.19630886753600 | 0.72135858437100 | T | T | T |
| 0.29165057954500 | 0.19687604372800 | 0.27648848025800 | T | T | T |
| 0.29191740138400 | 0.19639361479500 | 0.61067533057600 | T | T | T |
| 0.29192327385500 | 0.19636975053000 | 0.94408748320800 | T | T | T |
| 0.62522537436000 | 0.19635851755000 | 0.27745465396600 | T | T | T |
| 0.62524728720000 | 0.19638671439200 | 0.61071530647600 | T | T | T |
| 0.62524734679600 | 0.19636687635700 | 0.94416584838000 | T | T | T |
| 0.95860176147700 | 0.19638738178400 | 0.27749990033400 | T | T | T |
| 0.95858646897200 | 0.19637197025100 | 0.61080744247400 | T | T | T |
| 0.95859140009800 | 0.19638681170900 | 0.94411159108400 | T | T | T |
| 0.29069852944400 | 0.19589525543300 | 0.16574433807900 | T | T | T |
| 0.29206029322900 | 0.19611280272400 | 0.49875001205800 | T | T | T |
| 0.29204911123400 | 0.19607623512900 | 0.83217755666600 | T | T | T |
| 0.62539144630800 | 0.19610613358600 | 0.16538243847700 | T | T | T |

|                  |                  |                  |   |   |   |
|------------------|------------------|------------------|---|---|---|
| 0.62539356290500 | 0.19612095981000 | 0.49873378974100 | T | T | T |
| 0.62538681457800 | 0.19609303671700 | 0.83211037483100 | T | T | T |
| 0.95877841328800 | 0.19613441562100 | 0.16541091369300 | T | T | T |
| 0.95872896618600 | 0.19613200167500 | 0.49871620184000 | T | T | T |
| 0.95871973119000 | 0.19611229949600 | 0.83208588267200 | T | T | T |
| 0.04297156535230 | 0.19654725598100 | 0.05495524567060 | T | T | T |
| 0.04316399801160 | 0.19648911085800 | 0.38856450250000 | T | T | T |
| 0.04312184696230 | 0.19648005769600 | 0.72190051129600 | T | T | T |
| 0.37640514242300 | 0.19651681722200 | 0.05525486839760 | T | T | T |
| 0.37641966671300 | 0.19648067264900 | 0.38860795967200 | T | T | T |
| 0.37647113116800 | 0.19644469878900 | 0.72193216929800 | T | T | T |
| 0.70979660746900 | 0.19646396713000 | 0.05522821920180 | T | T | T |
| 0.70978793402400 | 0.19645519484800 | 0.38860116258000 | T | T | T |
| 0.70979059435200 | 0.19646458541700 | 0.72190557663400 | T | T | T |
| 0.04148538482140 | 0.19633458914500 | 0.27766219933400 | T | T | T |
| 0.04141511402430 | 0.19631752669200 | 0.61095822211500 | T | T | T |
| 0.04135136470070 | 0.19629562528300 | 0.94414991430700 | T | T | T |
| 0.37473921791200 | 0.19626650669900 | 0.27777505755500 | T | T | T |
| 0.37473995406500 | 0.19631876529400 | 0.61093138519900 | T | T | T |
| 0.37472669098000 | 0.19630449845500 | 0.94429327058400 | T | T | T |
| 0.70807085217600 | 0.19629234536400 | 0.27766045511800 | T | T | T |
| 0.70806107332500 | 0.19631717393600 | 0.61093544269500 | T | T | T |
| 0.70808061259600 | 0.19631059834000 | 0.94430533263600 | T | T | T |
| 0.04158090395470 | 0.19616972970400 | 0.16547606519700 | T | T | T |
| 0.04157318542440 | 0.19609786794800 | 0.49895721977300 | T | T | T |
| 0.04157383183980 | 0.19608218429200 | 0.83230370860500 | T | T | T |
| 0.37467230509000 | 0.19600104788600 | 0.16575164922600 | T | T | T |
| 0.37488833188300 | 0.19608772216900 | 0.49896452245400 | T | T | T |
| 0.37491265165800 | 0.19605601290700 | 0.83236414213300 | T | T | T |
| 0.70820808636100 | 0.19606876419500 | 0.16562520074500 | T | T | T |

|                  |                  |                  |   |   |   |
|------------------|------------------|------------------|---|---|---|
| 0.70822512134700 | 0.19608460348700 | 0.49896752368900 | T | T | T |
| 0.70823751530200 | 0.19605821971000 | 0.83234076221600 | T | T | T |
| 0.20816279692500 | 0.19655110035600 | 0.05476986002390 | T | T | T |
| 0.20569971550700 | 0.19634981472400 | 0.38846259501800 | T | T | T |
| 0.20571155630100 | 0.19622256681200 | 0.72195664811300 | T | T | T |
| 0.53906445702000 | 0.19621975632700 | 0.05527453908240 | T | T | T |
| 0.53904847385200 | 0.19624183235200 | 0.38859082897400 | T | T | T |
| 0.53906037733400 | 0.19623354432300 | 0.72194006771500 | T | T | T |
| 0.87242462938200 | 0.19622605053300 | 0.05528764458950 | T | T | T |
| 0.87239452815600 | 0.19623250157900 | 0.38861949166300 | T | T | T |
| 0.87239888899000 | 0.19623088831700 | 0.72195949481800 | T | T | T |
| 0.20805776042800 | 0.19673356371700 | 0.27631822409900 | T | T | T |
| 0.20802778332900 | 0.19648956036000 | 0.61103077783300 | T | T | T |
| 0.20806159472700 | 0.19648073378000 | 0.94430127796900 | T | T | T |
| 0.54136787364400 | 0.19649591312500 | 0.27765999095800 | T | T | T |
| 0.54136680216400 | 0.19648348404500 | 0.61103492485900 | T | T | T |
| 0.54135953893100 | 0.19648783712100 | 0.94436802984000 | T | T | T |
| 0.87469801759200 | 0.19647318906300 | 0.27772032555600 | T | T | T |
| 0.87469337608500 | 0.19648333700500 | 0.61104616658700 | T | T | T |
| 0.87470623962100 | 0.19650001932400 | 0.94436536247100 | T | T | T |
| 0.20785793898900 | 0.19594751997200 | 0.16583028366400 | T | T | T |
| 0.20792111439700 | 0.19592831661100 | 0.49917772541900 | T | T | T |
| 0.20791977757000 | 0.19591646625700 | 0.83256728594200 | T | T | T |
| 0.54125660923200 | 0.19592802614000 | 0.16582459257400 | T | T | T |
| 0.54124900103000 | 0.19593750482500 | 0.49917109749300 | T | T | T |
| 0.54124838086000 | 0.19592714606100 | 0.83251770642800 | T | T | T |
| 0.87459388232600 | 0.19591991654500 | 0.16586560517500 | T | T | T |
| 0.87457800148000 | 0.19593676072300 | 0.49916545049100 | T | T | T |
| 0.87459611954400 | 0.19592362998300 | 0.83253762948700 | T | T | T |
| 0.00058990509993 | 0.24469215558200 | 0.00912078492779 | T | T | T |

|                  |                  |                  |   |   |   |
|------------------|------------------|------------------|---|---|---|
| 0.00067952581890 | 0.24463334807000 | 0.34246355593700 | T | T | T |
| 0.00059579386191 | 0.24459436609100 | 0.67583161606800 | T | T | T |
| 0.33391090147600 | 0.24463526297500 | 0.00911957028630 | T | T | T |
| 0.33362966632300 | 0.24473957289100 | 0.34209216702900 | T | T | T |
| 0.33391837083400 | 0.24458951923000 | 0.67579115178600 | T | T | T |
| 0.66726610476400 | 0.24459679470000 | 0.00915955251976 | T | T | T |
| 0.66724645407300 | 0.24463704767500 | 0.34246349698300 | T | T | T |
| 0.66725130337200 | 0.24456403997700 | 0.67582092329500 | T | T | T |
| 0.33238415823600 | 0.24794121596700 | 0.22568535959700 | T | T | T |
| 0.33259424310700 | 0.24774764102900 | 0.55928504877200 | T | T | T |
| 0.33258684367500 | 0.24783726143000 | 0.89264370283900 | T | T | T |
| 0.66591379236500 | 0.24778914255400 | 0.22591303772100 | T | T | T |
| 0.66592986005100 | 0.24775532276600 | 0.55928525018200 | T | T | T |
| 0.66591984428400 | 0.24779205305500 | 0.89261720865000 | T | T | T |
| 0.99939646831200 | 0.24789166285900 | 0.22599506679700 | T | T | T |
| 0.99926543736500 | 0.24777307817300 | 0.55926924037300 | T | T | T |
| 0.99923914688900 | 0.24778877987300 | 0.89262722959100 | T | T | T |
| 0.00151687198415 | 0.24468138996100 | 0.11773608969400 | T | T | T |
| 0.00124901836509 | 0.24445848033400 | 0.45106817343800 | T | T | T |
| 0.00125206495084 | 0.24446364146300 | 0.78440787055700 | T | T | T |
| 0.33404270484100 | 0.24479454800500 | 0.11794059390000 | T | T | T |
| 0.33457650388600 | 0.24448183311300 | 0.45104413084000 | T | T | T |
| 0.33459257824200 | 0.24452852326700 | 0.78437688109600 | T | T | T |
| 0.66791093176400 | 0.24443113727300 | 0.11772716519300 | T | T | T |
| 0.66791272319300 | 0.24444993060400 | 0.45106124126000 | T | T | T |
| 0.66791265450900 | 0.24442940124800 | 0.78439278932100 | T | T | T |
| 0.16634572564900 | 0.24483383917700 | 0.00904220686156 | T | T | T |
| 0.16605894487400 | 0.24482367738800 | 0.34067159438400 | T | T | T |
| 0.16602488891000 | 0.24480013868200 | 0.67585629351100 | T | T | T |
| 0.49936818225900 | 0.24480803658500 | 0.00917340011241 | T | T | T |

|                  |                  |                  |   |   |   |
|------------------|------------------|------------------|---|---|---|
| 0.49934937224900 | 0.24480212373500 | 0.34250852196700 | T | T | T |
| 0.49938297981500 | 0.24479225304200 | 0.67586354355400 | T | T | T |
| 0.83272142382500 | 0.24482801681500 | 0.00916703668481 | T | T | T |
| 0.83270820848700 | 0.24485573279100 | 0.34250406399500 | T | T | T |
| 0.83270832820400 | 0.24480847868900 | 0.67585782108400 | T | T | T |
| 0.16586224703300 | 0.25237199168200 | 0.22554065772700 | T | T | T |
| 0.16539602687000 | 0.24854405589700 | 0.55894984501500 | T | T | T |
| 0.16540524530600 | 0.24855526559700 | 0.89232462763000 | T | T | T |
| 0.49873270208000 | 0.24852417524400 | 0.22560980182200 | T | T | T |
| 0.49872902981400 | 0.24852708378100 | 0.55897199956500 | T | T | T |
| 0.49872601230200 | 0.24852819242000 | 0.89232377935500 | T | T | T |
| 0.83206480361500 | 0.24855340602100 | 0.22559659449700 | T | T | T |
| 0.83205858862800 | 0.24853592397700 | 0.55896463231000 | T | T | T |
| 0.83206577718400 | 0.24854393279200 | 0.89232140830200 | T | T | T |
| 0.16740492466100 | 0.24500080825100 | 0.11884699937600 | T | T | T |
| 0.16317059480500 | 0.27985055208500 | 0.43436379843000 | T | T | T |
| 0.16317342879200 | 0.27980512904300 | 0.76774229111700 | T | T | T |
| 0.49648006027500 | 0.27979800230700 | 0.10106954540300 | T | T | T |
| 0.49651271089800 | 0.27983230354800 | 0.43437484295800 | T | T | T |
| 0.49651396503000 | 0.27981910059700 | 0.76772576007200 | T | T | T |
| 0.82987230741300 | 0.27978473228400 | 0.10107871178400 | T | T | T |
| 0.82984033354600 | 0.27982945353400 | 0.43438027178400 | T | T | T |
| 0.82984462802200 | 0.27981451402800 | 0.76773182502100 | T | T | T |
| 0.08340390825250 | 0.24480757782800 | 0.00814345169879 | T | T | T |
| 0.08361167274980 | 0.24462374332300 | 0.34181512094500 | T | T | T |
| 0.08351292098490 | 0.24460541122400 | 0.67568477727600 | T | T | T |
| 0.41683105434400 | 0.24462084382700 | 0.00901338692930 | T | T | T |
| 0.41682333066400 | 0.24469857660200 | 0.34229245637600 | T | T | T |
| 0.41685946788800 | 0.24460428265600 | 0.67567373062300 | T | T | T |
| 0.75018475455100 | 0.24462980114800 | 0.00900595108238 | T | T | T |



|                  |                  |                  |   |   |   |
|------------------|------------------|------------------|---|---|---|
| 0.75019218292400 | 0.24467639040900 | 0.34232380372800 | T | T | T |
| 0.75017935080900 | 0.24459760510600 | 0.67568568876200 | T | T | T |
| 0.08346615165810 | 0.24472570433900 | 0.22891937829700 | T | T | T |
| 0.08300702892080 | 0.24434573570000 | 0.56147066967900 | T | T | T |
| 0.08300087611450 | 0.24448321468000 | 0.89477416037600 | T | T | T |
| 0.41632622655600 | 0.24444881697400 | 0.22806453022800 | T | T | T |
| 0.41633318872100 | 0.24432055369600 | 0.56147766030300 | T | T | T |
| 0.41632153656100 | 0.24451113005300 | 0.89476386986600 | T | T | T |
| 0.74966352406500 | 0.24438177734100 | 0.22810228064900 | T | T | T |
| 0.74966526973400 | 0.24432067215200 | 0.56148266925000 | T | T | T |
| 0.74966547417300 | 0.24445747428800 | 0.89477201173400 | T | T | T |
| 0.08514588323160 | 0.24779915082300 | 0.11948032207900 | T | T | T |
| 0.08525605719920 | 0.24818218952400 | 0.45476447335800 | T | T | T |
| 0.08523601737990 | 0.24819250960200 | 0.78818423016200 | T | T | T |
| 0.41842139284900 | 0.24824514498300 | 0.12144153701000 | T | T | T |
| 0.41856304813600 | 0.24820975609900 | 0.45481373310300 | T | T | T |
| 0.41859004020100 | 0.24824056078000 | 0.78813583005500 | T | T | T |
| 0.75191491004700 | 0.24818839891100 | 0.12150813837400 | T | T | T |
| 0.75191590975800 | 0.24821895291800 | 0.45484042944400 | T | T | T |
| 0.75191318662400 | 0.24820796596900 | 0.78816030779400 | T | T | T |
| 0.25003608811300 | 0.24465102768000 | 0.00884698771390 | T | T | T |
| 0.24972171577500 | 0.24475114940400 | 0.34081423637700 | T | T | T |
| 0.24983453204500 | 0.24456928257000 | 0.67560652123600 | T | T | T |
| 0.58317214259000 | 0.24460408534900 | 0.00896279349474 | T | T | T |
| 0.58315710059100 | 0.24459163383300 | 0.34229080058000 | T | T | T |
| 0.58317320676500 | 0.24456413698500 | 0.67563376432700 | T | T | T |
| 0.91652045730600 | 0.24464008619200 | 0.00894175338480 | T | T | T |
| 0.91651990534500 | 0.24463155864000 | 0.34228220183500 | T | T | T |
| 0.91650873706000 | 0.24459091508900 | 0.67563450991300 | T | T | T |
| 0.24793506941400 | 0.25160558100800 | 0.22589899511700 | T | T | T |

|                  |                  |                  |   |   |   |
|------------------|------------------|------------------|---|---|---|
| 0.24959684662900 | 0.24483678444000 | 0.56174448623900 | T | T | T |
| 0.24961697956700 | 0.24518380113300 | 0.89498981542900 | T | T | T |
| 0.58293596757900 | 0.24484670994900 | 0.22839616989500 | T | T | T |
| 0.58293506299100 | 0.24484037608200 | 0.56174571331500 | T | T | T |
| 0.58293670636900 | 0.24496023130600 | 0.89502989499600 | T | T | T |
| 0.91631984457900 | 0.24495180267000 | 0.22840816212500 | T | T | T |
| 0.91627250241100 | 0.24484002756200 | 0.56174371572600 | T | T | T |
| 0.91625843671300 | 0.24502726969700 | 0.89500460612100 | T | T | T |
| 0.24995712941000 | 0.24499078635100 | 0.11785693286100 | T | T | T |
| 0.25412684799600 | 0.24456329989500 | 0.44900821446900 | T | T | T |
| 0.25413552396000 | 0.24460895358600 | 0.78235022585900 | T | T | T |
| 0.58747199288800 | 0.24452242496600 | 0.11570932295600 | T | T | T |
| 0.58746028844300 | 0.24447464152700 | 0.44906393158100 | T | T | T |
| 0.58746521476000 | 0.24448472438600 | 0.78239267776000 | T | T | T |
| 0.92105142650900 | 0.24480958259800 | 0.11568285672500 | T | T | T |
| 0.92079781397400 | 0.24447506030200 | 0.44906833305600 | T | T | T |
| 0.92081066153800 | 0.24449704059300 | 0.78240416388600 | T | T | T |
| 0.12495302483400 | 0.99476639759800 | 0.03167699672220 | T | T | T |
| 0.12536770153400 | 0.99522441929600 | 0.36466144120300 | T | T | T |
| 0.12498192335400 | 0.99480919314400 | 0.69859304641700 | T | T | T |
| 0.45831640226100 | 0.99485060190500 | 0.03188774583890 | T | T | T |
| 0.45830038779400 | 0.99485799645800 | 0.36522811723800 | T | T | T |
| 0.45833720025500 | 0.99484752890800 | 0.69857684018700 | T | T | T |
| 0.79166378677000 | 0.99487359242400 | 0.03189563386000 | T | T | T |
| 0.79165454274800 | 0.99498080535500 | 0.36533496858700 | T | T | T |
| 0.79164717506500 | 0.99486137959300 | 0.69861116717000 | T | T | T |
| 0.12438103413400 | 0.99671474892300 | 0.25264109597400 | T | T | T |
| 0.12280509614800 | 0.99845368970100 | 0.58518482156600 | T | T | T |
| 0.12283823083900 | 0.99853854459900 | 0.91854692793600 | T | T | T |
| 0.45616672902400 | 0.99857334378700 | 0.25183008350300 | T | T | T |

|                  |                  |                  |   |   |   |
|------------------|------------------|------------------|---|---|---|
| 0.45612454136000 | 0.99844972156500 | 0.58517623139200 | T | T | T |
| 0.45611334300000 | 0.99852180792700 | 0.91851555547900 | T | T | T |
| 0.78945701862800 | 0.99851318405600 | 0.25185721090300 | T | T | T |
| 0.78946480085300 | 0.99844628070200 | 0.58517788019400 | T | T | T |
| 0.78946019844500 | 0.99850224815500 | 0.91850638767700 | T | T | T |
| 0.12639665305900 | 0.99464444325700 | 0.14270761980100 | T | T | T |
| 0.12651650705400 | 0.99465003832300 | 0.47612989484500 | T | T | T |
| 0.12658878048600 | 0.99466894058600 | 0.80944847404700 | T | T | T |
| 0.45947629136600 | 0.99475948315400 | 0.14242305019100 | T | T | T |
| 0.45995859516300 | 0.99468299151200 | 0.47608179506000 | T | T | T |
| 0.45990245091300 | 0.99470114205400 | 0.80938199793800 | T | T | T |
| 0.79325289665800 | 0.99466351344700 | 0.14282619606400 | T | T | T |
| 0.79328297334800 | 0.99465470494900 | 0.47611596312000 | T | T | T |
| 0.79324520258500 | 0.99469029890200 | 0.80942122235400 | T | T | T |
| 0.29163712421400 | 0.99460813449300 | 0.03056044427840 | T | T | T |
| 0.29181443422200 | 0.99506705340500 | 0.36368632962900 | T | T | T |
| 0.29161844019700 | 0.99475448017700 | 0.69724395860900 | T | T | T |
| 0.62492494965000 | 0.99470467546300 | 0.03055202461840 | T | T | T |
| 0.62493833180500 | 0.99470442875200 | 0.36387838928200 | T | T | T |
| 0.62494004933400 | 0.99467463252300 | 0.69721720936000 | T | T | T |
| 0.95825420782100 | 0.99473200723400 | 0.03060056174250 | T | T | T |
| 0.95828477054100 | 0.99467730145800 | 0.36385603434700 | T | T | T |
| 0.95825236318300 | 0.99463941949400 | 0.69721376728700 | T | T | T |
| 0.29074491127600 | 0.99678302470600 | 0.25012194058900 | T | T | T |
| 0.29086631923600 | 0.99639686236300 | 0.58419587656300 | T | T | T |
| 0.29057475598900 | 0.99665561757600 | 0.91720883887200 | T | T | T |
| 0.62420522694100 | 0.99641304908700 | 0.25086730117200 | T | T | T |
| 0.62418762769400 | 0.99639263782300 | 0.58418464165800 | T | T | T |
| 0.62404473507800 | 0.99652109203700 | 0.91738923404200 | T | T | T |
| 0.95771726481200 | 0.99632627698300 | 0.25097774204100 | T | T | T |

|                  |                  |                  |   |   |   |
|------------------|------------------|------------------|---|---|---|
| 0.95751765732600 | 0.99641215807400 | 0.58418709335600 | T | T | T |
| 0.95719316503800 | 0.99660329107200 | 0.91715203383500 | T | T | T |
| 0.29175655567200 | 0.99618986993800 | 0.14129006361500 | T | T | T |
| 0.29316228204100 | 0.99601861130900 | 0.47423776708800 | T | T | T |
| 0.29315379898000 | 0.99607020182600 | 0.80761796968300 | T | T | T |
| 0.62666494538100 | 0.99628351521100 | 0.14080979908800 | T | T | T |
| 0.62654743934000 | 0.99608180544600 | 0.47416872602400 | T | T | T |
| 0.62649100953600 | 0.99601440718500 | 0.80757907512200 | T | T | T |
| 0.96026143383800 | 0.99581168142300 | 0.14115610379400 | T | T | T |
| 0.96004027837300 | 0.99633470442800 | 0.47404734798400 | T | T | T |
| 0.96009984642800 | 0.99646049881700 | 0.80736912221700 | T | T | T |
| 0.04200250183710 | 0.99460981626900 | 0.03161315370810 | T | T | T |
| 0.04216566884270 | 0.99479878851100 | 0.36492399521200 | T | T | T |
| 0.04203200922390 | 0.99467333967500 | 0.69834201802600 | T | T | T |
| 0.37531884228900 | 0.99474102532600 | 0.03164955948620 | T | T | T |
| 0.37509402327000 | 0.99501406816400 | 0.36468787045900 | T | T | T |
| 0.37535146245800 | 0.99475472726000 | 0.69834078847200 | T | T | T |
| 0.70868853586200 | 0.99472431140100 | 0.03167146433170 | T | T | T |
| 0.70868869510300 | 0.99475867227100 | 0.36501875856500 | T | T | T |
| 0.70869525560500 | 0.99469360025500 | 0.69834107545400 | T | T | T |
| 0.04056881238480 | 0.99742968617900 | 0.25126594769900 | T | T | T |
| 0.04003828323070 | 0.99673962155500 | 0.58447493719700 | T | T | T |
| 0.04003498407800 | 0.99682390711200 | 0.91786367899200 | T | T | T |
| 0.37354730836900 | 0.99715560432700 | 0.25105641188000 | T | T | T |
| 0.37336109430500 | 0.99674785103200 | 0.58446092192600 | T | T | T |
| 0.37335740887500 | 0.99680036907100 | 0.91783192883900 | T | T | T |
| 0.70671562824500 | 0.99679744438900 | 0.25115183385800 | T | T | T |
| 0.70670024829700 | 0.99672749866200 | 0.58445928423100 | T | T | T |
| 0.70669918516800 | 0.99679490356100 | 0.91782515759900 | T | T | T |
| 0.04221434503730 | 0.99548948525300 | 0.14172852024700 | T | T | T |

|                  |                  |                  |   |   |   |
|------------------|------------------|------------------|---|---|---|
| 0.04120821747160 | 0.99602915473900 | 0.47508106480000 | T | T | T |
| 0.04114947617560 | 0.99610360383200 | 0.80843153739900 | T | T | T |
| 0.37469792849200 | 0.99576345254400 | 0.14171575761100 | T | T | T |
| 0.37467420146700 | 0.99557071801500 | 0.47529916880400 | T | T | T |
| 0.37471127470200 | 0.99566854421100 | 0.80863169848800 | T | T | T |
| 0.70786489104500 | 0.99590789468800 | 0.14187319686500 | T | T | T |
| 0.70795342067300 | 0.99568815663300 | 0.47525676924000 | T | T | T |
| 0.70802115120300 | 0.99565261605100 | 0.80863806394700 | T | T | T |
| 0.20863778094200 | 0.99504352997900 | 0.03094780747300 | T | T | T |
| 0.20833406477700 | 0.99537278961600 | 0.36402791590900 | T | T | T |
| 0.20846040266300 | 0.99508941589900 | 0.69756488130000 | T | T | T |
| 0.54177974248300 | 0.99510156852000 | 0.03089497464100 | T | T | T |
| 0.54177737381200 | 0.99505785061100 | 0.36419308687300 | T | T | T |
| 0.54181708479800 | 0.99503062707200 | 0.69757552291500 | T | T | T |
| 0.87513406811600 | 0.99511505789100 | 0.03091574167150 | T | T | T |
| 0.87510715619200 | 0.99507598773200 | 0.36422725559400 | T | T | T |
| 0.87511489210700 | 0.99506270126400 | 0.69756796903500 | T | T | T |
| 0.20745013759000 | 0.99659235452900 | 0.25210964388400 | T | T | T |
| 0.20565009051200 | 0.99610249532300 | 0.58493318982000 | T | T | T |
| 0.20592982714600 | 0.99644249939500 | 0.91788395806600 | T | T | T |
| 0.53898674146900 | 0.99610612831700 | 0.25157675140500 | T | T | T |
| 0.53896417600400 | 0.99612303472300 | 0.58493241835400 | T | T | T |
| 0.53911155046500 | 0.99626455431000 | 0.91809704126200 | T | T | T |
| 0.87231503267800 | 0.99612075448300 | 0.25166108304200 | T | T | T |
| 0.87231536517600 | 0.99612348584900 | 0.58492468139800 | T | T | T |
| 0.87263097717500 | 0.99637939976700 | 0.91785415561400 | T | T | T |
| 0.20914211151500 | 0.99574979533800 | 0.14165528675100 | T | T | T |
| 0.20877948370200 | 0.00593640486428 | 0.46877619299600 | T | T | T |
| 0.20878469350900 | 0.00591139767236 | 0.80204853984200 | T | T | T |
| 0.54213430253900 | 0.00589887958606 | 0.13543143888000 | T | T | T |

|                  |                  |                  |   |   |   |
|------------------|------------------|------------------|---|---|---|
| 0.54212649449100 | 0.00587542872653 | 0.46875368623100 | T | T | T |
| 0.54212428115100 | 0.00586345907191 | 0.80206849650300 | T | T | T |
| 0.87570093833800 | 0.00592261414384 | 0.13548626677700 | T | T | T |
| 0.87550031664400 | 0.00586025221555 | 0.46875697675300 | T | T | T |
| 0.87551114306000 | 0.00586816410710 | 0.80205217766600 | T | T | T |
| 0.00045280628877 | 0.06693112026640 | 0.08227466294020 | T | T | T |
| 0.00041570422557 | 0.06766630895010 | 0.41513292664900 | T | T | T |
| 0.00043203707099 | 0.06790890185890 | 0.74840003214300 | T | T | T |
| 0.33353731176000 | 0.06668985426400 | 0.08240064550810 | T | T | T |
| 0.33380036510400 | 0.06706842208860 | 0.41550714454600 | T | T | T |
| 0.33377174088300 | 0.06701276456880 | 0.74884816875100 | T | T | T |
| 0.66708715409700 | 0.06758602667660 | 0.08189135516600 | T | T | T |
| 0.66708315578500 | 0.06724162708380 | 0.41539300237200 | T | T | T |
| 0.66708501866500 | 0.06704926784890 | 0.74882468000800 | T | T | T |
| 0.33296433989500 | 0.06590103508530 | 0.30492225677100 | T | T | T |
| 0.33308021834300 | 0.06567062118090 | 0.63868490300300 | T | T | T |
| 0.33298471468300 | 0.06566013993910 | 0.97197127018400 | T | T | T |
| 0.66638465402300 | 0.06566204704500 | 0.30534514054600 | T | T | T |
| 0.66640303472100 | 0.06566829997120 | 0.63868633912100 | T | T | T |
| 0.66638552098900 | 0.06566594235110 | 0.97200625936800 | T | T | T |
| 0.99973351434500 | 0.06574044508850 | 0.30536898176500 | T | T | T |
| 0.99974215192800 | 0.06566510219310 | 0.63869828000000 | T | T | T |
| 0.99973470973300 | 0.06563303252460 | 0.97197288829500 | T | T | T |
| 0.33280527850500 | 0.06881661823620 | 0.19279809516100 | T | T | T |
| 0.33314811200600 | 0.06872097985010 | 0.52636747413400 | T | T | T |
| 0.33319727518600 | 0.06868673104320 | 0.85973916182600 | T | T | T |
| 0.66646865787100 | 0.06874762432780 | 0.19306330293700 | T | T | T |
| 0.66647781115300 | 0.06871843406760 | 0.52637346162100 | T | T | T |
| 0.66648712366800 | 0.06870209094670 | 0.85972763770600 | T | T | T |
| 0.99994339706900 | 0.06861037196700 | 0.19299401621000 | T | T | T |

|                  |                  |                  |   |   |   |
|------------------|------------------|------------------|---|---|---|
| 0.99981750910000 | 0.06874334930830 | 0.52638655050900 | T | T | T |
| 0.99985326623000 | 0.06873406358470 | 0.85975104481600 | T | T | T |
| 0.16706538079800 | 0.06624503535810 | 0.08312798284070 | T | T | T |
| 0.16703778289900 | 0.06320458302750 | 0.41893891748500 | T | T | T |
| 0.16704930103500 | 0.06318771952470 | 0.75230944918600 | T | T | T |
| 0.50036340526300 | 0.06321479851500 | 0.08561061560580 | T | T | T |
| 0.50038628260000 | 0.06318963405190 | 0.41895180972000 | T | T | T |
| 0.50039387640700 | 0.06319173420980 | 0.75230738235600 | T | T | T |
| 0.83372283911200 | 0.06321115004000 | 0.08562358440750 | T | T | T |
| 0.83378038085200 | 0.06317203597300 | 0.41903109353400 | T | T | T |
| 0.83373818734700 | 0.06318357805760 | 0.75232293006000 | T | T | T |
| 0.16681398723500 | 0.06621285562300 | 0.30497835903500 | T | T | T |
| 0.16638084261300 | 0.06568211773200 | 0.63893858701800 | T | T | T |
| 0.16651435260500 | 0.06568110240260 | 0.97225902865500 | T | T | T |
| 0.49977449998900 | 0.06568584386910 | 0.30557750591000 | T | T | T |
| 0.49972964961600 | 0.06568405362600 | 0.63894263005500 | T | T | T |
| 0.49970455535200 | 0.06567684847510 | 0.97223110764200 | T | T | T |
| 0.83304074336800 | 0.06566819811510 | 0.30560305291900 | T | T | T |
| 0.83303632372800 | 0.06567265326610 | 0.63893516382700 | T | T | T |
| 0.83309614393000 | 0.06563740744470 | 0.97221461124300 | T | T | T |
| 0.16647436190800 | 0.06695951625380 | 0.19417445196900 | T | T | T |
| 0.16577097058700 | 0.06805044057730 | 0.52688552709800 | T | T | T |
| 0.16575972958300 | 0.06806224289460 | 0.86020448133800 | T | T | T |
| 0.49906427153400 | 0.06800360925490 | 0.19348686959700 | T | T | T |
| 0.49908935739000 | 0.06804992946780 | 0.52688253458900 | T | T | T |
| 0.49909092465300 | 0.06802994813630 | 0.86021086815100 | T | T | T |
| 0.83244449442200 | 0.06806328201340 | 0.19356216603000 | T | T | T |
| 0.83242514939300 | 0.06804650200460 | 0.52688760507700 | T | T | T |
| 0.83241749922700 | 0.06803484071380 | 0.86021166646800 | T | T | T |
| 0.08395951867720 | 0.06608255787370 | 0.08349734921940 | T | T | T |

|                  |                  |                  |   |   |   |
|------------------|------------------|------------------|---|---|---|
| 0.08449176831490 | 0.06531777877040 | 0.41724594014100 | T | T | T |
| 0.08442780192230 | 0.06529136542780 | 0.75069233866800 | T | T | T |
| 0.41772950543500 | 0.06573501244440 | 0.08353106516710 | T | T | T |
| 0.41772154453600 | 0.06525218081550 | 0.41731615778600 | T | T | T |
| 0.41775014796400 | 0.06532107614720 | 0.75063700438300 | T | T | T |
| 0.75108502658400 | 0.06528780643950 | 0.08402538328130 | T | T | T |
| 0.75102147895100 | 0.06526713898720 | 0.41741240442800 | T | T | T |
| 0.75105120949600 | 0.06529844340860 | 0.75068178359800 | T | T | T |
| 0.08323489609660 | 0.06588170314860 | 0.30529754301200 | T | T | T |
| 0.08311126922500 | 0.06570353623570 | 0.63877357327700 | T | T | T |
| 0.08318777757150 | 0.06582133944920 | 0.97207248979300 | T | T | T |
| 0.41654581005200 | 0.06572108794240 | 0.30544420368800 | T | T | T |
| 0.41644560894100 | 0.06570457637130 | 0.63876615369600 | T | T | T |
| 0.41640415072200 | 0.06570935875190 | 0.97210175380000 | T | T | T |
| 0.74977713668500 | 0.06568667604690 | 0.30543825373700 | T | T | T |
| 0.74976290017500 | 0.06569657539470 | 0.63876545455000 | T | T | T |
| 0.74977592481000 | 0.06571061912130 | 0.97209750522000 | T | T | T |
| 0.08325920030540 | 0.06711836859140 | 0.19334187040000 | T | T | T |
| 0.08344721829530 | 0.06822591766240 | 0.52622212452600 | T | T | T |
| 0.08346049031020 | 0.06819275344630 | 0.85961057356000 | T | T | T |
| 0.41674801545600 | 0.06816095934900 | 0.19279714036100 | T | T | T |
| 0.41674496981000 | 0.06820702897000 | 0.52617924855200 | T | T | T |
| 0.41676804253300 | 0.06815674724410 | 0.85956080551200 | T | T | T |
| 0.75009724366000 | 0.06822737998730 | 0.19288476342900 | T | T | T |
| 0.75008882906400 | 0.06821546061730 | 0.52619220323200 | T | T | T |
| 0.75008727961300 | 0.06817463339920 | 0.85955033057100 | T | T | T |
| 0.25042098225200 | 0.06691788001530 | 0.08227708927070 | T | T | T |
| 0.25032215729700 | 0.06851148564920 | 0.41435752611300 | T | T | T |
| 0.25031527284000 | 0.06852788330000 | 0.74772930423700 | T | T | T |
| 0.58364869366800 | 0.06857101189290 | 0.08103568761390 | T | T | T |



|                   |                  |                  |   |   |   |
|-------------------|------------------|------------------|---|---|---|
| 0.58363980575400  | 0.06856218958430 | 0.41434857393300 | T | T | T |
| 0.58365507719200  | 0.06856049373770 | 0.74770928187400 | T | T | T |
| 0.91706755973900  | 0.06840945712310 | 0.08114391086490 | T | T | T |
| 0.91697893045500  | 0.06857708409050 | 0.41434059699000 | T | T | T |
| 0.91698903464000  | 0.06856869817910 | 0.74769652984000 | T | T | T |
| 0.24995057108000  | 0.06622254648360 | 0.30446378676300 | T | T | T |
| 0.25022086636200  | 0.06601405728570 | 0.63786226056000 | T | T | T |
| 0.25013944623000  | 0.06605352319110 | 0.97115231495700 | T | T | T |
| 0.58353428595400  | 0.06602011607660 | 0.30450259923400 | T | T | T |
| 0.58354824320500  | 0.06601715837410 | 0.63784833630000 | T | T | T |
| 0.58353295997900  | 0.06601447790660 | 0.97117569549200 | T | T | T |
| 0.91686092505400  | 0.06602497550600 | 0.30452535978100 | T | T | T |
| 0.91687658061400  | 0.06601535220270 | 0.63785612324000 | T | T | T |
| 0.91689167981700  | 0.06599852744450 | 0.97116509299000 | T | T | T |
| 0.24940165763800  | 0.06779446648620 | 0.19366190213900 | T | T | T |
| 0.25014330149700  | 0.06638477841510 | 0.52730678993400 | T | T | T |
| 0.25013276568100  | 0.06688215269300 | 0.86023733515600 | T | T | T |
| 0.58345295304900  | 0.06642876254990 | 0.19397206146900 | T | T | T |
| 0.58345799469500  | 0.06638803429080 | 0.52729250436500 | T | T | T |
| 0.58346174829700  | 0.06658394414180 | 0.86044309874800 | T | T | T |
| 0.91686835180900  | 0.06631382707460 | 0.19401534429200 | T | T | T |
| 0.91677344301400  | 0.06639727723630 | 0.52729695587100 | T | T | T |
| 0.91679033261300  | 0.06695655432640 | 0.86019629825000 | T | T | T |
| 0.04166666667330  | 0.13043999673400 | 0.02777666599470 | F | F | F |
| 0.04166666667330  | 0.13043999673400 | 0.36110999932900 | F | F | F |
| 0.04166666667330  | 0.13043999673400 | 0.69444333266100 | F | F | F |
| 0.37500000000700  | 0.13043999673400 | 0.02777666599470 | F | F | F |
| 0.37500000000700  | 0.13043999673400 | 0.36110999932900 | F | F | F |
| 0.37500000000700  | 0.13043999673400 | 0.69444333266100 | F | F | F |
| 0.708333333334100 | 0.13043999673400 | 0.02777666599470 | F | F | F |

|                  |                  |                  |   |   |   |
|------------------|------------------|------------------|---|---|---|
| 0.70833333334100 | 0.13043999673400 | 0.36110999932900 | F | F | F |
| 0.70833333334100 | 0.13043999673400 | 0.69444333266100 | F | F | F |
| 0.04166666667330 | 0.13043999673400 | 0.24999999994900 | F | F | F |
| 0.04166666667330 | 0.13043999673400 | 0.58333333328300 | F | F | F |
| 0.04166666667330 | 0.13043999673400 | 0.91666666661700 | F | F | F |
| 0.3750000000700  | 0.13043999673400 | 0.24999999994900 | F | F | F |
| 0.3750000000700  | 0.13043999673400 | 0.58333333328300 | F | F | F |
| 0.3750000000700  | 0.13043999673400 | 0.91666666661700 | F | F | F |
| 0.70833333334100 | 0.13043999673400 | 0.24999999994900 | F | F | F |
| 0.70833333334100 | 0.13043999673400 | 0.58333333328300 | F | F | F |
| 0.70833333334100 | 0.13043999673400 | 0.91666666661700 | F | F | F |
| 0.04166666667330 | 0.13043999673400 | 0.13888999819000 | F | F | F |
| 0.04166666667330 | 0.13043999673400 | 0.47222333152400 | F | F | F |
| 0.04166666667330 | 0.13043999673400 | 0.80555666485600 | F | F | F |
| 0.3750000000700  | 0.13043999673400 | 0.13888999819000 | F | F | F |
| 0.3750000000700  | 0.13043999673400 | 0.47222333152400 | F | F | F |
| 0.3750000000700  | 0.13043999673400 | 0.80555666485600 | F | F | F |
| 0.70833333334100 | 0.13043999673400 | 0.13888999819000 | F | F | F |
| 0.70833333334100 | 0.13043999673400 | 0.47222333152400 | F | F | F |
| 0.70833333334100 | 0.13043999673400 | 0.80555666485600 | F | F | F |
| 0.20833333332800 | 0.13043999673400 | 0.02777666599470 | F | F | F |
| 0.20833333332800 | 0.13043999673400 | 0.36110999932900 | F | F | F |
| 0.20833333332800 | 0.13043999673400 | 0.69444333266100 | F | F | F |
| 0.54166666666100 | 0.13043999673400 | 0.02777666599470 | F | F | F |
| 0.54166666666100 | 0.13043999673400 | 0.36110999932900 | F | F | F |
| 0.54166666666100 | 0.13043999673400 | 0.69444333266100 | F | F | F |
| 0.8749999999500  | 0.13043999673400 | 0.02777666599470 | F | F | F |
| 0.8749999999500  | 0.13043999673400 | 0.36110999932900 | F | F | F |
| 0.8749999999500  | 0.13043999673400 | 0.69444333266100 | F | F | F |
| 0.20833333332800 | 0.13043999673400 | 0.24999999994900 | F | F | F |

|                 |                  |                  |   |   |   |
|-----------------|------------------|------------------|---|---|---|
| 0.2083333332800 | 0.13043999673400 | 0.58333333328300 | F | F | F |
| 0.2083333332800 | 0.13043999673400 | 0.9166666661700  | F | F | F |
| 0.5416666666100 | 0.13043999673400 | 0.2499999994900  | F | F | F |
| 0.5416666666100 | 0.13043999673400 | 0.58333333328300 | F | F | F |
| 0.5416666666100 | 0.13043999673400 | 0.9166666661700  | F | F | F |
| 0.8749999999500 | 0.13043999673400 | 0.2499999994900  | F | F | F |
| 0.8749999999500 | 0.13043999673400 | 0.58333333328300 | F | F | F |
| 0.8749999999500 | 0.13043999673400 | 0.9166666661700  | F | F | F |
| 0.2083333332800 | 0.13043999673400 | 0.13888999819000 | F | F | F |
| 0.2083333332800 | 0.13043999673400 | 0.47222333152400 | F | F | F |
| 0.2083333332800 | 0.13043999673400 | 0.80555666485600 | F | F | F |
| 0.5416666666100 | 0.13043999673400 | 0.13888999819000 | F | F | F |
| 0.5416666666100 | 0.13043999673400 | 0.47222333152400 | F | F | F |
| 0.5416666666100 | 0.13043999673400 | 0.80555666485600 | F | F | F |
| 0.8749999999500 | 0.13043999673400 | 0.13888999819000 | F | F | F |
| 0.8749999999500 | 0.13043999673400 | 0.47222333152400 | F | F | F |
| 0.8749999999500 | 0.13043999673400 | 0.80555666485600 | F | F | F |
| 0.1250000000200 | 0.13043999673400 | 0.02777666599470 | F | F | F |
| 0.1250000000200 | 0.13043999673400 | 0.36110999932900 | F | F | F |
| 0.1250000000200 | 0.13043999673400 | 0.69444333266100 | F | F | F |
| 0.4583333333400 | 0.13043999673400 | 0.02777666599470 | F | F | F |
| 0.4583333333400 | 0.13043999673400 | 0.36110999932900 | F | F | F |
| 0.4583333333400 | 0.13043999673400 | 0.69444333266100 | F | F | F |
| 0.7916666666800 | 0.13043999673400 | 0.02777666599470 | F | F | F |
| 0.7916666666800 | 0.13043999673400 | 0.36110999932900 | F | F | F |
| 0.7916666666800 | 0.13043999673400 | 0.69444333266100 | F | F | F |
| 0.1250000000200 | 0.13043999673400 | 0.2499999994900  | F | F | F |
| 0.1250000000200 | 0.13043999673400 | 0.58333333328300 | F | F | F |
| 0.1250000000200 | 0.13043999673400 | 0.9166666661700  | F | F | F |
| 0.4583333333400 | 0.13043999673400 | 0.2499999994900  | F | F | F |

|                  |                  |                  |   |   |   |
|------------------|------------------|------------------|---|---|---|
| 0.45833333333400 | 0.13043999673400 | 0.58333333328300 | F | F | F |
| 0.45833333333400 | 0.13043999673400 | 0.91666666661700 | F | F | F |
| 0.79166666666800 | 0.13043999673400 | 0.24999999994900 | F | F | F |
| 0.79166666666800 | 0.13043999673400 | 0.58333333328300 | F | F | F |
| 0.79166666666800 | 0.13043999673400 | 0.91666666661700 | F | F | F |
| 0.12500000000200 | 0.13043999673400 | 0.13888999819000 | F | F | F |
| 0.12500000000200 | 0.13043999673400 | 0.47222333152400 | F | F | F |
| 0.12500000000200 | 0.13043999673400 | 0.80555666485600 | F | F | F |
| 0.45833333333400 | 0.13043999673400 | 0.13888999819000 | F | F | F |
| 0.45833333333400 | 0.13043999673400 | 0.47222333152400 | F | F | F |
| 0.45833333333400 | 0.13043999673400 | 0.80555666485600 | F | F | F |
| 0.79166666666800 | 0.13043999673400 | 0.13888999819000 | F | F | F |
| 0.79166666666800 | 0.13043999673400 | 0.47222333152400 | F | F | F |
| 0.79166666666800 | 0.13043999673400 | 0.80555666485600 | F | F | F |
| 0.29166666669900 | 0.13043999673400 | 0.02777666599470 | F | F | F |
| 0.29166666669900 | 0.13043999673400 | 0.36110999932900 | F | F | F |
| 0.29166666669900 | 0.13043999673400 | 0.69444333266100 | F | F | F |
| 0.62500000003100 | 0.13043999673400 | 0.02777666599470 | F | F | F |
| 0.62500000003100 | 0.13043999673400 | 0.36110999932900 | F | F | F |
| 0.62500000003100 | 0.13043999673400 | 0.69444333266100 | F | F | F |
| 0.95833333336500 | 0.13043999673400 | 0.02777666599470 | F | F | F |
| 0.95833333336500 | 0.13043999673400 | 0.36110999932900 | F | F | F |
| 0.95833333336500 | 0.13043999673400 | 0.69444333266100 | F | F | F |
| 0.29166666669900 | 0.13043999673400 | 0.24999999994900 | F | F | F |
| 0.29166666669900 | 0.13043999673400 | 0.58333333328300 | F | F | F |
| 0.29166666669900 | 0.13043999673400 | 0.91666666661700 | F | F | F |
| 0.62500000003100 | 0.13043999673400 | 0.24999999994900 | F | F | F |
| 0.62500000003100 | 0.13043999673400 | 0.58333333328300 | F | F | F |
| 0.62500000003100 | 0.13043999673400 | 0.91666666661700 | F | F | F |
| 0.95833333336500 | 0.13043999673400 | 0.24999999994900 | F | F | F |

|                  |                  |                  |   |   |   |
|------------------|------------------|------------------|---|---|---|
| 0.95833333336500 | 0.13043999673400 | 0.58333333328300 | F | F | F |
| 0.95833333336500 | 0.13043999673400 | 0.91666666661700 | F | F | F |
| 0.29166666669900 | 0.13043999673400 | 0.13888999819000 | F | F | F |
| 0.29166666669900 | 0.13043999673400 | 0.47222333152400 | F | F | F |
| 0.29166666669900 | 0.13043999673400 | 0.80555666485600 | F | F | F |
| 0.6250000003100  | 0.13043999673400 | 0.13888999819000 | F | F | F |
| 0.6250000003100  | 0.13043999673400 | 0.47222333152400 | F | F | F |
| 0.6250000003100  | 0.13043999673400 | 0.80555666485600 | F | F | F |
| 0.95833333336500 | 0.13043999673400 | 0.13888999819000 | F | F | F |
| 0.95833333336500 | 0.13043999673400 | 0.47222333152400 | F | F | F |
| 0.95833333336500 | 0.13043999673400 | 0.80555666485600 | F | F | F |
| 0.00076430665753 | 0.19382562359200 | 0.08247614217310 | T | T | T |
| 0.00060801611761 | 0.19381931401600 | 0.41576206922400 | T | T | T |
| 0.00061411572063 | 0.19385575277100 | 0.74910731461400 | T | T | T |
| 0.33375854864500 | 0.19400346473000 | 0.08261049800510 | T | T | T |
| 0.33392536059400 | 0.19376757157500 | 0.41573446524500 | T | T | T |
| 0.33395055708600 | 0.19376571195700 | 0.74913071563100 | T | T | T |
| 0.66726771556200 | 0.19379043367400 | 0.08242236834940 | T | T | T |
| 0.66725976450000 | 0.19375923308800 | 0.41574801151700 | T | T | T |
| 0.66725603469000 | 0.19375400723400 | 0.74909092747600 | T | T | T |
| 0.00002913152416 | 0.19521216499700 | 0.30544248322000 | T | T | T |
| 0.00003368918799 | 0.19528205084400 | 0.63878980953700 | T | T | T |
| 0.00007216720935 | 0.19526215393900 | 0.97211312042800 | T | T | T |
| 0.33305913404900 | 0.19526469455800 | 0.30508160589100 | T | T | T |
| 0.33333610544800 | 0.19528400928300 | 0.63876608479300 | T | T | T |
| 0.33331503587200 | 0.19521353620000 | 0.97212381308700 | T | T | T |
| 0.66666906045200 | 0.19527808331300 | 0.30544878876900 | T | T | T |
| 0.66667204340500 | 0.19526863661000 | 0.63877245499000 | T | T | T |
| 0.66669602709000 | 0.19525224563000 | 0.97212760687600 | T | T | T |
| 0.33285756321100 | 0.19274238659300 | 0.19316269437700 | T | T | T |

|                  |                  |                  |   |   |   |
|------------------|------------------|------------------|---|---|---|
| 0.33328975029600 | 0.19281841350500 | 0.52666256299800 | T | T | T |
| 0.33329646512200 | 0.19285872040200 | 0.86004186828300 | T | T | T |
| 0.66660909296000 | 0.19281218217200 | 0.19333957674300 | T | T | T |
| 0.66661966129100 | 0.19283376561200 | 0.52665664671100 | T | T | T |
| 0.66661923230300 | 0.19283546718400 | 0.86002154583000 | T | T | T |
| 0.00003698006808 | 0.19296973714300 | 0.19328920458500 | T | T | T |
| 0.99995503772800 | 0.19283122828000 | 0.52665962705500 | T | T | T |
| 0.99996790714700 | 0.19285263562200 | 0.86001737801500 | T | T | T |
| 0.16694719297600 | 0.19439009749500 | 0.08308816109390 | T | T | T |
| 0.16685470783600 | 0.19731943187400 | 0.41885479050400 | T | T | T |
| 0.16680023381600 | 0.19724901538200 | 0.75226078235500 | T | T | T |
| 0.50013527592400 | 0.19722399216100 | 0.08558614242740 | T | T | T |
| 0.50013504592300 | 0.19724760849900 | 0.41890172950000 | T | T | T |
| 0.50015258319100 | 0.19725243837800 | 0.75227196513100 | T | T | T |
| 0.83348500724700 | 0.19722623008600 | 0.08558260979530 | T | T | T |
| 0.83347220738500 | 0.19724884875600 | 0.41892232234900 | T | T | T |
| 0.83347620436100 | 0.19725195909100 | 0.75226783753100 | T | T | T |
| 0.16656432493400 | 0.19436056665700 | 0.30450620111900 | T | T | T |
| 0.16653848815700 | 0.19524023659500 | 0.63887435112700 | T | T | T |
| 0.16661967317500 | 0.19510171243800 | 0.97221816078200 | T | T | T |
| 0.49989230075700 | 0.19522060992100 | 0.30550456549600 | T | T | T |
| 0.49986218242300 | 0.19523205432800 | 0.63887540781100 | T | T | T |
| 0.49984742796300 | 0.19521217997700 | 0.97219089101900 | T | T | T |
| 0.83318417126300 | 0.19524366930500 | 0.30553339725800 | T | T | T |
| 0.83318584072800 | 0.19524091631700 | 0.63887139961100 | T | T | T |
| 0.83320277337300 | 0.19521620284000 | 0.97219412788700 | T | T | T |
| 0.16652947954700 | 0.19394603909500 | 0.19411851236800 | T | T | T |
| 0.16618403413200 | 0.19320173884900 | 0.52644403226700 | T | T | T |
| 0.16616925549700 | 0.19322796227300 | 0.85980683270800 | T | T | T |
| 0.49952039245400 | 0.19317367493900 | 0.19309856419300 | T | T | T |

|                  |                  |                  |   |   |   |
|------------------|------------------|------------------|---|---|---|
| 0.49949735860700 | 0.19322008543200 | 0.52643537776700 | T | T | T |
| 0.49950467461500 | 0.19322397159400 | 0.85978310377100 | T | T | T |
| 0.83283894637200 | 0.19317179081100 | 0.19312694402300 | T | T | T |
| 0.83283545575500 | 0.19321519745300 | 0.52644415338100 | T | T | T |
| 0.83283811605500 | 0.19322956768000 | 0.85979087184900 | T | T | T |
| 0.08400619836000 | 0.19541565940200 | 0.08386389767250 | T | T | T |
| 0.08389023193240 | 0.19632990674400 | 0.41793475532600 | T | T | T |
| 0.08373657049590 | 0.19629488655800 | 0.75139291323200 | T | T | T |
| 0.41703330952600 | 0.19625363958200 | 0.08471295461090 | T | T | T |
| 0.41707153829200 | 0.19627305290300 | 0.41800595507500 | T | T | T |
| 0.41708488801900 | 0.19628062278500 | 0.75138821974800 | T | T | T |
| 0.75040994557700 | 0.19628721491300 | 0.08472809569700 | T | T | T |
| 0.75040579418200 | 0.19628574577200 | 0.41805059424000 | T | T | T |
| 0.75039742483300 | 0.19628816073100 | 0.75139459354200 | T | T | T |
| 0.08343345987950 | 0.19490087825700 | 0.30498748204400 | T | T | T |
| 0.08321761574200 | 0.19512508243400 | 0.63864759660000 | T | T | T |
| 0.08325555358550 | 0.19477326276800 | 0.97173739656900 | T | T | T |
| 0.41661253410700 | 0.19510302708500 | 0.30532665416700 | T | T | T |
| 0.41652908454400 | 0.19512842417900 | 0.63864727399900 | T | T | T |
| 0.41650418688500 | 0.19511263221500 | 0.97198755586000 | T | T | T |
| 0.74986906033300 | 0.19512867991200 | 0.30532887385100 | T | T | T |
| 0.74985610592600 | 0.19512495561600 | 0.63864514233300 | T | T | T |
| 0.74986986444300 | 0.19511821630600 | 0.97197841326800 | T | T | T |
| 0.08327814912920 | 0.19406328253400 | 0.19339078315100 | T | T | T |
| 0.08370154177700 | 0.19358614209000 | 0.52641557840900 | T | T | T |
| 0.08370051303830 | 0.19362218238300 | 0.85979527584400 | T | T | T |
| 0.41700135964400 | 0.19359018982900 | 0.19306104276600 | T | T | T |
| 0.41702337384600 | 0.19359468034000 | 0.52638826417200 | T | T | T |
| 0.41703654747900 | 0.19361767184500 | 0.85977873289100 | T | T | T |
| 0.75034656705100 | 0.19359698852600 | 0.19307583939900 | T | T | T |

|                  |                  |                  |   |   |   |
|------------------|------------------|------------------|---|---|---|
| 0.75036266286500 | 0.19359942996300 | 0.52639404243900 | T | T | T |
| 0.75036780403900 | 0.19360762956200 | 0.85977081377600 | T | T | T |
| 0.25019502483000 | 0.19399537799400 | 0.08259200597810 | T | T | T |
| 0.25001751561000 | 0.19300154193100 | 0.41490811121000 | T | T | T |
| 0.25003430715600 | 0.19295412867700 | 0.74833299079200 | T | T | T |
| 0.58337710084100 | 0.19292354516300 | 0.08163571132740 | T | T | T |
| 0.58336867640700 | 0.19294422233000 | 0.41494203642500 | T | T | T |
| 0.58338120681800 | 0.19294382362000 | 0.74830203626200 | T | T | T |
| 0.91678927986400 | 0.19300309794400 | 0.08171091835640 | T | T | T |
| 0.91670383514400 | 0.19293773729600 | 0.41495694991400 | T | T | T |
| 0.91671992142000 | 0.19294387581500 | 0.74830593495200 | T | T | T |
| 0.24997938435600 | 0.19468220538800 | 0.30446648015000 | T | T | T |
| 0.25012816071500 | 0.19528376587700 | 0.63843453318600 | T | T | T |
| 0.25005002247600 | 0.19520192922600 | 0.97177597262900 | T | T | T |
| 0.58341013454500 | 0.19527226179700 | 0.30511244884600 | T | T | T |
| 0.58344468734400 | 0.19527810176000 | 0.63843664379800 | T | T | T |
| 0.58341369167600 | 0.19528075873000 | 0.97178922958300 | T | T | T |
| 0.91673951108100 | 0.19527602669400 | 0.30512033444500 | T | T | T |
| 0.91675360399100 | 0.19528681995100 | 0.63845633883300 | T | T | T |
| 0.91678458358300 | 0.19529669757800 | 0.97179107800400 | T | T | T |
| 0.24947092494000 | 0.19393813867100 | 0.19394847851300 | T | T | T |
| 0.25009821127900 | 0.19412481191400 | 0.52644435577400 | T | T | T |
| 0.25007837162900 | 0.19423665248100 | 0.85987829200300 | T | T | T |
| 0.58343000524200 | 0.19413053368600 | 0.19309532504500 | T | T | T |
| 0.58341906027300 | 0.19413901610400 | 0.52642769537200 | T | T | T |
| 0.58341366610200 | 0.19416543684400 | 0.85980625991800 | T | T | T |
| 0.91678917004300 | 0.19415550692500 | 0.19314894435000 | T | T | T |
| 0.91675089702700 | 0.19415571378200 | 0.52643163839500 | T | T | T |
| 0.91676425229100 | 0.19418973348600 | 0.85982796365600 | T | T | T |
| 0.12476028258100 | 0.26577551968400 | 0.03147276165970 | T | T | T |



|                  |                  |                  |   |   |   |
|------------------|------------------|------------------|---|---|---|
| 0.12518387449100 | 0.26488840455600 | 0.36476404685500 | T | T | T |
| 0.12479617349400 | 0.26532683433300 | 0.69887358991100 | T | T | T |
| 0.45811285829900 | 0.26522460827200 | 0.03222146994190 | T | T | T |
| 0.45808536703200 | 0.26530234736600 | 0.36552406363000 | T | T | T |
| 0.45811239959500 | 0.26529644653500 | 0.69888472154400 | T | T | T |
| 0.79146664992200 | 0.26527062218000 | 0.03219958632610 | T | T | T |
| 0.79145127289400 | 0.26528459781000 | 0.36556167093300 | T | T | T |
| 0.79145319190100 | 0.26528560292300 | 0.69888280188000 | T | T | T |
| 0.12446359147400 | 0.26471030786900 | 0.25236109174000 | T | T | T |
| 0.12435225986400 | 0.26255778203700 | 0.58525580937000 | T | T | T |
| 0.12436637508500 | 0.26250816589200 | 0.91864316896000 | T | T | T |
| 0.45766093749100 | 0.26244025394300 | 0.25190431139200 | T | T | T |
| 0.45766790119200 | 0.26255343024700 | 0.58525219211900 | T | T | T |
| 0.45766361787300 | 0.26248564402100 | 0.91860196980100 | T | T | T |
| 0.79098589297800 | 0.26250843041900 | 0.25193270982500 | T | T | T |
| 0.79100657194500 | 0.26256640372700 | 0.58525213193400 | T | T | T |
| 0.79098804901200 | 0.26251733943900 | 0.91859431236200 | T | T | T |
| 0.12673779562600 | 0.26641750424200 | 0.14288907601800 | T | T | T |
| 0.12712997095600 | 0.26733268378900 | 0.47563930950900 | T | T | T |
| 0.12720388067100 | 0.26728593563200 | 0.80892432118800 | T | T | T |
| 0.46031245633700 | 0.26723090348400 | 0.14233248491400 | T | T | T |
| 0.46050526031100 | 0.26731626656700 | 0.47553963576100 | T | T | T |
| 0.46050593972900 | 0.26729338104600 | 0.80890413389900 | T | T | T |
| 0.79385597630700 | 0.26725098963700 | 0.14230659243800 | T | T | T |
| 0.79384584143200 | 0.26734704350100 | 0.47557940282600 | T | T | T |
| 0.79382430521200 | 0.26731117427500 | 0.80892288127000 | T | T | T |
| 0.29187729843500 | 0.26572098476700 | 0.03130404831790 | T | T | T |
| 0.29150827099600 | 0.26516884438600 | 0.36431439321100 | T | T | T |
| 0.29183812566100 | 0.26546364393700 | 0.69806278310900 | T | T | T |
| 0.62516233964500 | 0.26550924034200 | 0.03136430432680 | T | T | T |

|                  |                  |                  |   |   |   |
|------------------|------------------|------------------|---|---|---|
| 0.62516794467000 | 0.26551493947300 | 0.36468375850500 | T | T | T |
| 0.62516544042700 | 0.26555371999800 | 0.69801767693100 | T | T | T |
| 0.95852066991500 | 0.26548430769700 | 0.03141585303170 | T | T | T |
| 0.95851954978900 | 0.26549979691100 | 0.36467390757900 | T | T | T |
| 0.95849321381500 | 0.26554160051700 | 0.69802178284000 | T | T | T |
| 0.29088821565400 | 0.26458266799900 | 0.25036222436600 | T | T | T |
| 0.29138754282300 | 0.26425551651500 | 0.58451914572500 | T | T | T |
| 0.29138020240500 | 0.26410479906200 | 0.91797223008600 | T | T | T |
| 0.62472448361400 | 0.26418163656900 | 0.25123464138900 | T | T | T |
| 0.62471841546800 | 0.26423681506000 | 0.58452018690500 | T | T | T |
| 0.62470127182000 | 0.26413733682400 | 0.91790908253800 | T | T | T |
| 0.95810582134300 | 0.26427259216500 | 0.25126531038500 | T | T | T |
| 0.95804992040800 | 0.26420329144000 | 0.58455439793000 | T | T | T |
| 0.95802444755400 | 0.26416488291900 | 0.91791227376500 | T | T | T |
| 0.29184853616700 | 0.26465146270500 | 0.14131924899600 | T | T | T |
| 0.29338239920600 | 0.26513143630000 | 0.47447157388000 | T | T | T |
| 0.29339322771300 | 0.26505686027400 | 0.80787654582300 | T | T | T |
| 0.62673591151800 | 0.26517142378100 | 0.14117104667100 | T | T | T |
| 0.62671369850500 | 0.26518911662100 | 0.47445863692400 | T | T | T |
| 0.62672152774900 | 0.26514222300600 | 0.80783465057800 | T | T | T |
| 0.96046981822600 | 0.26528231074400 | 0.14136386416400 | T | T | T |
| 0.96003699435100 | 0.26522600283900 | 0.47447078776300 | T | T | T |
| 0.96006255563700 | 0.26517640743900 | 0.80783332930500 | T | T | T |
| 0.04222395403510 | 0.26591799869300 | 0.03151416760190 | T | T | T |
| 0.04218802782390 | 0.26579714493900 | 0.36493092734400 | T | T | T |
| 0.04202705274080 | 0.26595078754300 | 0.69837707863500 | T | T | T |
| 0.37532482968000 | 0.26587100005700 | 0.03172930885630 | T | T | T |
| 0.37514654425200 | 0.26564898149000 | 0.36489031561400 | T | T | T |
| 0.37533346558500 | 0.26587277937900 | 0.69840348098700 | T | T | T |
| 0.70868951043300 | 0.26591629840400 | 0.03172521309130 | T | T | T |

|                  |                  |                  |   |   |   |
|------------------|------------------|------------------|---|---|---|
| 0.70867734582100 | 0.26587800488000 | 0.36506155188700 | T | T | T |
| 0.70868136821300 | 0.26592641521100 | 0.69838711593100 | T | T | T |
| 0.04088152462410 | 0.26439258808000 | 0.25131643665800 | T | T | T |
| 0.04092798278740 | 0.26449748774700 | 0.58445846332900 | T | T | T |
| 0.04092348357190 | 0.26443716541000 | 0.91784803076500 | T | T | T |
| 0.37423749083800 | 0.26415675348200 | 0.25104883465100 | T | T | T |
| 0.37425478501700 | 0.26448769171500 | 0.58444309800600 | T | T | T |
| 0.37425689592400 | 0.26442085547600 | 0.91783528748300 | T | T | T |
| 0.70758819353300 | 0.26444566602500 | 0.25114126075000 | T | T | T |
| 0.70759301385000 | 0.26450492135000 | 0.58443921369500 | T | T | T |
| 0.70758352776400 | 0.26443810577400 | 0.91780897341000 | T | T | T |
| 0.04212337577930 | 0.26554617900200 | 0.14199457620400 | T | T | T |
| 0.04119515317300 | 0.26558165142100 | 0.47565034294600 | T | T | T |
| 0.04119406000980 | 0.26559078798800 | 0.80900994566200 | T | T | T |
| 0.37424020354700 | 0.26549004792400 | 0.14238800892300 | T | T | T |
| 0.37451479698400 | 0.26556175044000 | 0.47562862147700 | T | T | T |
| 0.37452636960200 | 0.26549632138700 | 0.80902684894400 | T | T | T |
| 0.70783451254400 | 0.26556493902000 | 0.14235067395000 | T | T | T |
| 0.70784636865500 | 0.26557225405300 | 0.47564072245300 | T | T | T |
| 0.70784487621300 | 0.26551964569700 | 0.80901330155600 | T | T | T |
| 0.20827630758900 | 0.26577931952700 | 0.03141659374400 | T | T | T |
| 0.20791943189700 | 0.26502600257500 | 0.36379086377100 | T | T | T |
| 0.20808051040900 | 0.26569769759900 | 0.69808266077000 | T | T | T |
| 0.54137739081900 | 0.26568345633200 | 0.03141693756350 | T | T | T |
| 0.54136576599300 | 0.26572878014500 | 0.36471096743700 | T | T | T |
| 0.54139021244700 | 0.26573197213500 | 0.69807553189900 | T | T | T |
| 0.87474244166100 | 0.26567338798000 | 0.03143521229380 | T | T | T |
| 0.87470479012700 | 0.26570885303100 | 0.36474600049700 | T | T | T |
| 0.87472081706600 | 0.26571952274000 | 0.69808510269900 | T | T | T |
| 0.20736771131100 | 0.26454915862300 | 0.25222369125500 | T | T | T |

|                  |                  |                  |   |   |   |
|------------------|------------------|------------------|---|---|---|
| 0.20736369406100 | 0.26448772710300 | 0.58443549752300 | T | T | T |
| 0.20735314959800 | 0.26437080959800 | 0.91785463199600 | T | T | T |
| 0.54068920991700 | 0.26448053109300 | 0.25108522662900 | T | T | T |
| 0.54068565634900 | 0.26447628043700 | 0.58443392131500 | T | T | T |
| 0.54069643289600 | 0.26442607156500 | 0.91777907524400 | T | T | T |
| 0.87400728992500 | 0.26444981930000 | 0.25112536507200 | T | T | T |
| 0.87402101697600 | 0.26449087093000 | 0.58443122037500 | T | T | T |
| 0.87401272124400 | 0.26444753016400 | 0.91780430035400 | T | T | T |
| 0.20912871502300 | 0.26512471496300 | 0.14170664501800 | T | T | T |
| 0.20868838923400 | 0.25717675223500 | 0.46789867852800 | T | T | T |
| 0.20869840080200 | 0.25714681704400 | 0.80124592172900 | T | T | T |
| 0.54200971332400 | 0.25719905328700 | 0.13457236775100 | T | T | T |
| 0.54200546271200 | 0.25722618033100 | 0.46788906590700 | T | T | T |
| 0.54202388468800 | 0.25720823726300 | 0.80123292785000 | T | T | T |
| 0.87557298339000 | 0.25713868123100 | 0.13461285247400 | T | T | T |
| 0.87534187436800 | 0.25723739681200 | 0.46788493092500 | T | T | T |
| 0.87535822531900 | 0.25719378980600 | 0.80123683162600 | T | T | T |
| 0.19346647927600 | 0.38392205881700 | 0.22262040968600 | T | T | T |
| 0.18917393562800 | 0.37751971168700 | 0.56110192185400 | T | T | T |
| 0.18916231802400 | 0.37751283912400 | 0.89447373312500 | T | T | T |
| 0.52251611448800 | 0.37751516554700 | 0.22779231424100 | T | T | T |
| 0.52251347787700 | 0.37751772170400 | 0.56113414498500 | T | T | T |
| 0.52250183096900 | 0.37751976199900 | 0.89448324799000 | T | T | T |
| 0.85585380568700 | 0.37752233395900 | 0.22780772949900 | T | T | T |
| 0.85583944111300 | 0.37752626267300 | 0.56113480438600 | T | T | T |
| 0.85583607539100 | 0.37751259792500 | 0.89448256120300 | T | T | T |
| 0.23673794691500 | 0.36089017646400 | 0.20903701173500 | T | T | T |
| 0.22242917394700 | 0.33823708151900 | 0.57352878009100 | T | T | T |
| 0.22249060739200 | 0.33824250979600 | 0.90681851506000 | T | T | T |
| 0.55577223901600 | 0.33824347130800 | 0.24019310896800 | T | T | T |

|                  |                  |                  |   |   |   |
|------------------|------------------|------------------|---|---|---|
| 0.55576921917800 | 0.33820794805300 | 0.57349138610000 | T | T | T |
| 0.55577059264200 | 0.33820319330500 | 0.90681691783200 | T | T | T |
| 0.88907274649500 | 0.33824213011900 | 0.24024976336600 | T | T | T |
| 0.88907329652000 | 0.33821600276900 | 0.57353676553500 | T | T | T |
| 0.88911660127200 | 0.33819770980200 | 0.90678477609300 | T | T | T |
| 0.16995630731700 | 0.36884689460800 | 0.24414474215500 | T | T | T |
| 0.16224441830600 | 0.36235603845200 | 0.58094756861300 | T | T | T |
| 0.16224089534100 | 0.36231783743300 | 0.91433796122000 | T | T | T |
| 0.49556593259000 | 0.36236749865100 | 0.24762088704400 | T | T | T |
| 0.49557981875100 | 0.36233121475900 | 0.58098817329400 | T | T | T |
| 0.49556900287800 | 0.36230950389300 | 0.91434625993200 | T | T | T |
| 0.82891187480200 | 0.36234279301200 | 0.24763637934600 | T | T | T |
| 0.82890745755800 | 0.36233653051100 | 0.58098882439100 | T | T | T |
| 0.82890753722200 | 0.36230314037700 | 0.91434665959700 | T | T | T |
| 0.16867111283500 | 0.33776361667200 | 0.21006898250500 | T | T | T |
| 0.16172041558900 | 0.35225064860800 | 0.54712086569700 | T | T | T |
| 0.16170263176900 | 0.35227795627000 | 0.88048739417900 | T | T | T |
| 0.49505480547500 | 0.35226835337000 | 0.21380555505000 | T | T | T |
| 0.49506062582500 | 0.35227713351400 | 0.54714414661800 | T | T | T |
| 0.49505052314700 | 0.35228924373300 | 0.88049341921400 | T | T | T |
| 0.82840847195500 | 0.35225123939600 | 0.21381266795700 | T | T | T |
| 0.82839609117000 | 0.35226578116700 | 0.54714687475100 | T | T | T |
| 0.82838353100900 | 0.35228205307700 | 0.88049501229700 | T | T | T |
| 0.18316167517800 | 0.32467445506000 | 0.27399215986700 | T | T | T |
| 0.17676601027300 | 0.32365922480100 | 0.60684165825600 | T | T | T |
| 0.17678496213000 | 0.32358639105300 | 0.94015521026600 | T | T | T |
| 0.51006599092400 | 0.32360978104300 | 0.27351642382600 | T | T | T |
| 0.51010146967500 | 0.32363650970000 | 0.60684226478600 | T | T | T |
| 0.51007978978200 | 0.32362000177500 | 0.94019432069300 | T | T | T |
| 0.84343633355900 | 0.32361114294500 | 0.27351041938200 | T | T | T |

|                  |                  |                  |   |   |   |
|------------------|------------------|------------------|---|---|---|
| 0.84342726281100 | 0.32365265579300 | 0.60685032165900 | T | T | T |
| 0.84342606509900 | 0.32359031221100 | 0.94017400342400 | T | T | T |
| 0.15017338454300 | 0.32697082409600 | 0.27377058637600 | T | T | T |
| 0.14369520709300 | 0.31986834040000 | 0.60279927908400 | T | T | T |
| 0.14370915857900 | 0.31981032775700 | 0.93614404262200 | T | T | T |
| 0.47698890411900 | 0.31990286166800 | 0.26950409942000 | T | T | T |
| 0.47702735915800 | 0.31984566771600 | 0.60279020488500 | T | T | T |
| 0.47700880105300 | 0.31981410545300 | 0.93612028731500 | T | T | T |
| 0.81035426810000 | 0.31985912851900 | 0.26948964487800 | T | T | T |
| 0.81035491063800 | 0.31984668461500 | 0.60278811497300 | T | T | T |
| 0.81034823556300 | 0.31982857441700 | 0.93613259594300 | T | T | T |
| 0.23998843241800 | 0.38692435007400 | 0.23596842918300 | T | T | T |
| 0.23017245860300 | 0.38665739879800 | 0.58203580050200 | T | T | T |
| 0.23018759306800 | 0.38663987745900 | 0.91538828223300 | T | T | T |
| 0.56347484740400 | 0.38665962557300 | 0.24873991296000 | T | T | T |
| 0.56350744046100 | 0.38658984526300 | 0.58207550527500 | T | T | T |
| 0.56349971710300 | 0.38657206122700 | 0.91542094567100 | T | T | T |
| 0.89687508930700 | 0.38668278776900 | 0.24867462222400 | T | T | T |
| 0.89685401720600 | 0.38661538844100 | 0.58205235172600 | T | T | T |
| 0.89682891870200 | 0.38655516238100 | 0.91542044610100 | T | T | T |
| 0.15351339570500 | 0.30566353512500 | 0.18559260525800 | T | T | T |
| 0.14461715716200 | 0.29929651470100 | 0.51595022389500 | T | T | T |
| 0.14460946062800 | 0.29932556051500 | 0.84927369599800 | T | T | T |
| 0.47794504038500 | 0.29930405733200 | 0.18264290631700 | T | T | T |
| 0.47798051032200 | 0.29935209514700 | 0.51594779539000 | T | T | T |
| 0.47796218426800 | 0.29936260470100 | 0.84929066001600 | T | T | T |
| 0.81134481629000 | 0.29922788601900 | 0.18261888022600 | T | T | T |
| 0.81132384334800 | 0.29932708037400 | 0.51595652994000 | T | T | T |
| 0.81128753821200 | 0.29934934079200 | 0.84929503007000 | T | T | T |
| 0.26161582683300 | 0.30281633621800 | 0.18034192579100 | T | T | T |

|                  |                  |                  |   |   |   |
|------------------|------------------|------------------|---|---|---|
| 0.17866432736100 | 0.30772756268900 | 0.52020168847900 | T | T | T |
| 0.17863493709600 | 0.30774755892400 | 0.85354789746900 | T | T | T |
| 0.51200637187500 | 0.30771011091900 | 0.18689123466100 | T | T | T |
| 0.51202522279000 | 0.30773987600200 | 0.52021786056000 | T | T | T |
| 0.51200127496400 | 0.30775080977800 | 0.85355015777700 | T | T | T |
| 0.84539150042500 | 0.30768446643800 | 0.18691242078700 | T | T | T |
| 0.84537309912900 | 0.30773225596000 | 0.52022506038000 | T | T | T |
| 0.84532722282500 | 0.30775240601000 | 0.85354808356800 | T | T | T |
| 0.19519749996600 | 0.88046549921000 | 0.22387340285200 | T | T | T |
| 0.18817651769600 | 0.88541997550000 | 0.56188727533300 | T | T | T |
| 0.18820809819400 | 0.88546493635900 | 0.89526983980600 | T | T | T |
| 0.52153436175400 | 0.88541777995100 | 0.22857896454700 | T | T | T |
| 0.52151639283800 | 0.88542507805000 | 0.56190936904100 | T | T | T |
| 0.52152187678300 | 0.88543427104500 | 0.89526204238000 | T | T | T |
| 0.85487196161200 | 0.88541264520700 | 0.22859365690500 | T | T | T |
| 0.85484733965400 | 0.88541864415400 | 0.56191231435800 | T | T | T |
| 0.85486746830900 | 0.88544584285200 | 0.89526642466800 | T | T | T |
| 0.23795074874200 | 0.90432246651700 | 0.21036516475600 | T | T | T |
| 0.22158122043500 | 0.92357532406600 | 0.57420437942900 | T | T | T |
| 0.22159494425600 | 0.92364768634200 | 0.90754512223000 | T | T | T |
| 0.55494289458400 | 0.92355671169100 | 0.24084774236300 | T | T | T |
| 0.55492339454800 | 0.92361055197000 | 0.57416102717800 | T | T | T |
| 0.55490191158200 | 0.92363639496300 | 0.90751474522400 | T | T | T |
| 0.88822747867900 | 0.92356236614200 | 0.24095479460800 | T | T | T |
| 0.88823750209400 | 0.92360463139800 | 0.57419885149300 | T | T | T |
| 0.88823934355900 | 0.92365786151900 | 0.90749148673100 | T | T | T |
| 0.17047763214200 | 0.89387964565400 | 0.24459621170100 | T | T | T |
| 0.16101324514500 | 0.90010028226600 | 0.58173158845100 | T | T | T |
| 0.16102574428300 | 0.90011357439200 | 0.91506654619600 | T | T | T |
| 0.49434988853900 | 0.90007757304400 | 0.24839986063400 | T | T | T |

|                  |                  |                  |   |   |   |
|------------------|------------------|------------------|---|---|---|
| 0.49434900139700 | 0.90011315464200 | 0.58175720247900 | T | T | T |
| 0.49434065988200 | 0.90012195724500 | 0.91509113273900 | T | T | T |
| 0.82768899841300 | 0.90009184365700 | 0.24840946291000 | T | T | T |
| 0.82767975622100 | 0.90010784284100 | 0.58175761056300 | T | T | T |
| 0.82768758912100 | 0.90012365592500 | 0.91508001810500 | T | T | T |
| 0.16919675853200 | 0.92401792934600 | 0.21016865382700 | T | T | T |
| 0.16079668181500 | 0.91101841448600 | 0.54778805484000 | T | T | T |
| 0.16079956258000 | 0.91100620646800 | 0.88114035725400 | T | T | T |
| 0.49413930555000 | 0.91097829995500 | 0.21446668455100 | T | T | T |
| 0.49413910428000 | 0.91100551176600 | 0.54780294501200 | T | T | T |
| 0.49413873051000 | 0.91099416356900 | 0.88114251604300 | T | T | T |
| 0.82749704021400 | 0.91101333964100 | 0.21447637189500 | T | T | T |
| 0.82747590353500 | 0.91101160762700 | 0.54780588804800 | T | T | T |
| 0.82747551618100 | 0.91100023607100 | 0.88114498216300 | T | T | T |
| 0.18269990800100 | 0.93774509172200 | 0.27457792296900 | T | T | T |
| 0.17506576317500 | 0.93754290586500 | 0.60864180012200 | T | T | T |
| 0.17511017059800 | 0.93763553691800 | 0.94195724650600 | T | T | T |
| 0.50839866663400 | 0.93758193427700 | 0.27531701443800 | T | T | T |
| 0.50840335045000 | 0.93755764285200 | 0.60863600032000 | T | T | T |
| 0.50837569418300 | 0.93756462337800 | 0.94199876795400 | T | T | T |
| 0.84173819582900 | 0.93755718211000 | 0.27533354443200 | T | T | T |
| 0.84173439782600 | 0.93754486004300 | 0.60864226823200 | T | T | T |
| 0.84173958794500 | 0.93758950384900 | 0.94198071546800 | T | T | T |
| 0.14970630090500 | 0.93546424761600 | 0.27400529408400 | T | T | T |
| 0.14212562028900 | 0.94140929510800 | 0.60401266877200 | T | T | T |
| 0.14216959620700 | 0.94153985223000 | 0.93734404421700 | T | T | T |
| 0.47544921981700 | 0.94134726218700 | 0.27074707213500 | T | T | T |
| 0.47546136025100 | 0.94142180890000 | 0.60399951454300 | T | T | T |
| 0.47543866408900 | 0.94146079825600 | 0.93733104408800 | T | T | T |
| 0.80879356487600 | 0.94142586734200 | 0.27069787424200 | T | T | T |



|                  |                  |                  |   |   |   |
|------------------|------------------|------------------|---|---|---|
| 0.80879401554000 | 0.94143206392300 | 0.60399580895700 | T | T | T |
| 0.80879515942900 | 0.94147522667100 | 0.93734287682100 | T | T | T |
| 0.23985147472000 | 0.88585889120000 | 0.23954917959500 | T | T | T |
| 0.22901546520400 | 0.87494808572900 | 0.58251731605700 | T | T | T |
| 0.22903905618300 | 0.87500467370000 | 0.91586748578700 | T | T | T |
| 0.56231406919700 | 0.87493437166600 | 0.24922541002600 | T | T | T |
| 0.56234606897800 | 0.87502333638000 | 0.58256081951800 | T | T | T |
| 0.56233909715300 | 0.87504408888200 | 0.91590524605700 | T | T | T |
| 0.89574459318800 | 0.87490212506000 | 0.24914609118200 | T | T | T |
| 0.89569388897300 | 0.87500205005300 | 0.58254052533100 | T | T | T |
| 0.89567416261300 | 0.87506255959500 | 0.91589944139100 | T | T | T |
| 0.15311540693600 | 0.95554909815300 | 0.18565579327600 | T | T | T |
| 0.14399281667000 | 0.96286924011100 | 0.51579270928000 | T | T | T |
| 0.14398463144300 | 0.96282372313600 | 0.84910116885400 | T | T | T |
| 0.47731688504300 | 0.96271485983400 | 0.18246964202100 | T | T | T |
| 0.47736195770100 | 0.96284676916900 | 0.51578125526800 | T | T | T |
| 0.47734119563600 | 0.96279450804100 | 0.84912081250000 | T | T | T |
| 0.81071923596800 | 0.96290594293900 | 0.18247027889500 | T | T | T |
| 0.81069623882200 | 0.96285339118300 | 0.51579858751100 | T | T | T |
| 0.81066593635200 | 0.96281430932500 | 0.84912462714000 | T | T | T |
| 0.26203462878100 | 0.96017772249300 | 0.18024728849000 | T | T | T |
| 0.17815851969800 | 0.95414421490100 | 0.52009219397600 | T | T | T |
| 0.17812833807000 | 0.95413947094500 | 0.85344267755000 | T | T | T |
| 0.51150327202600 | 0.95412887805200 | 0.18673736821800 | T | T | T |
| 0.51152036921600 | 0.95414350179400 | 0.52010914721800 | T | T | T |
| 0.51149739514700 | 0.95413170771500 | 0.85343520042600 | T | T | T |
| 0.84488790582100 | 0.95415845214900 | 0.18680578907900 | T | T | T |
| 0.84486007060400 | 0.95413748491500 | 0.52010852533200 | T | T | T |
| 0.84481667303100 | 0.95412829017100 | 0.85343176801000 | T | T | T |
| 0.03178581969600 | 0.37646559821900 | 0.22438373200600 | T | T | T |

|                  |                  |                  |   |   |   |
|------------------|------------------|------------------|---|---|---|
| 0.03000163965770 | 0.37502232741100 | 0.55563668481500 | T | T | T |
| 0.02997431242160 | 0.37500759898000 | 0.88899349749900 | T | T | T |
| 0.36314164772200 | 0.37539771226400 | 0.22253666241500 | T | T | T |
| 0.36333446948000 | 0.37502493977900 | 0.55563381856900 | T | T | T |
| 0.36332506128500 | 0.37506197161000 | 0.88901658342700 | T | T | T |
| 0.69665679166200 | 0.37502718197200 | 0.22230674829100 | T | T | T |
| 0.69666178634900 | 0.37502051519500 | 0.55565082972600 | T | T | T |
| 0.69665366312300 | 0.37503619416900 | 0.88900371818700 | T | T | T |
| 0.06417720145170 | 0.33701043323700 | 0.24016858373500 | T | T | T |
| 0.06030132823290 | 0.33431233784300 | 0.57257712611000 | T | T | T |
| 0.06034580361610 | 0.33427722127300 | 0.90587001362600 | T | T | T |
| 0.39361648911800 | 0.33450658340300 | 0.23957637489000 | T | T | T |
| 0.39365906886600 | 0.33428643823900 | 0.57252612895300 | T | T | T |
| 0.39367650465700 | 0.33427574536300 | 0.90581548514400 | T | T | T |
| 0.72691030389700 | 0.33432077145300 | 0.23933167430700 | T | T | T |
| 0.72697871440200 | 0.33426059188400 | 0.57250887281900 | T | T | T |
| 0.72697482142500 | 0.33426093487800 | 0.90584647611400 | T | T | T |
| 0.00235127917914 | 0.36331565237300 | 0.24226425316000 | T | T | T |
| 0.00064713725360 | 0.36343097684800 | 0.57301913643400 | T | T | T |
| 0.00062283916078 | 0.36337076886600 | 0.90639396690400 | T | T | T |
| 0.33396097833700 | 0.36280435122400 | 0.24034496902300 | T | T | T |
| 0.33398291872300 | 0.36344884186900 | 0.57302185577300 | T | T | T |
| 0.33396862121900 | 0.36341277514200 | 0.90641789571200 | T | T | T |
| 0.66730725213200 | 0.36343749265200 | 0.23969653568000 | T | T | T |
| 0.66731046832700 | 0.36342066378200 | 0.57304654640400 | T | T | T |
| 0.66730114555100 | 0.36339898415800 | 0.90640296471800 | T | T | T |
| 0.00558401796501 | 0.35235965295500 | 0.20829876029000 | T | T | T |
| 0.00390263031473 | 0.35062479469100 | 0.53935424235300 | T | T | T |
| 0.00388397604929 | 0.35062361812700 | 0.87270162722900 | T | T | T |
| 0.33722691329500 | 0.35112269122100 | 0.20632436037500 | T | T | T |

|                  |                  |                  |   |   |   |
|------------------|------------------|------------------|---|---|---|
| 0.33722321010300 | 0.35065214708900 | 0.53935359534500 | T | T | T |
| 0.33722009224900 | 0.35072400925400 | 0.87272566638300 | T | T | T |
| 0.67055826440500 | 0.35062069274100 | 0.20603155760400 | T | T | T |
| 0.67055939112900 | 0.35064461000600 | 0.53936813978500 | T | T | T |
| 0.67055341238400 | 0.35067610760000 | 0.87272198701700 | T | T | T |
| 0.01292176430810 | 0.32491583904500 | 0.26969443060800 | T | T | T |
| 0.01193460067850 | 0.32677966942000 | 0.60195657992200 | T | T | T |
| 0.01190788314380 | 0.32672939432400 | 0.93529818107000 | T | T | T |
| 0.34545865721900 | 0.32607213865900 | 0.26853966145000 | T | T | T |
| 0.34528185803600 | 0.32676572802400 | 0.60193084152200 | T | T | T |
| 0.34527577884500 | 0.32674503818900 | 0.93530162719200 | T | T | T |
| 0.67860073140300 | 0.32679493484600 | 0.26863678954700 | T | T | T |
| 0.67860529563500 | 0.32677458063100 | 0.60195336821000 | T | T | T |
| 0.67859957782900 | 0.32672441822100 | 0.93528564105700 | T | T | T |
| 0.31242102256600 | 0.32455932379400 | 0.26407348260100 | T | T | T |
| 0.31229778065300 | 0.32582293846200 | 0.59780496947200 | T | T | T |
| 0.31228727122600 | 0.32573501541100 | 0.93115375608100 | T | T | T |
| 0.64561416931800 | 0.32579196349000 | 0.26447627476000 | T | T | T |
| 0.64562172269700 | 0.32579468614600 | 0.59779917373300 | T | T | T |
| 0.64561032741100 | 0.32572268335000 | 0.93112564889700 | T | T | T |
| 0.97986367021800 | 0.32525139858600 | 0.26539208529400 | T | T | T |
| 0.97895044237900 | 0.32580663022000 | 0.59781113842000 | T | T | T |
| 0.97892586329100 | 0.32572027977000 | 0.93112355195300 | T | T | T |
| 0.07826239574410 | 0.38428759034700 | 0.23749093382100 | T | T | T |
| 0.07329189098170 | 0.38242973654900 | 0.57391690000900 | T | T | T |
| 0.07326448166050 | 0.38241465289700 | 0.90731882855600 | T | T | T |
| 0.40675155077200 | 0.38248499355000 | 0.24074118178200 | T | T | T |
| 0.40660921407400 | 0.38242200840800 | 0.57394229175100 | T | T | T |
| 0.40658772473200 | 0.38241552559800 | 0.90733156960100 | T | T | T |
| 0.73996204440700 | 0.38240615310000 | 0.24060661724500 | T | T | T |

|                  |                  |                  |   |   |   |
|------------------|------------------|------------------|---|---|---|
| 0.73993721166800 | 0.38238503458600 | 0.57396968092600 | T | T | T |
| 0.73994086002300 | 0.38237244038700 | 0.90730534176800 | T | T | T |
| 0.31749417382000 | 0.30114818610900 | 0.17690546824600 | T | T | T |
| 0.31678542865600 | 0.30205179165200 | 0.51043495163900 | T | T | T |
| 0.31678471167400 | 0.30204739774600 | 0.84378619239200 | T | T | T |
| 0.65012549785700 | 0.30195739414700 | 0.17714249195600 | T | T | T |
| 0.65012500416200 | 0.30205497061600 | 0.51043727089800 | T | T | T |
| 0.65012067290800 | 0.30200741861000 | 0.84379444127800 | T | T | T |
| 0.98442319432700 | 0.30304579804100 | 0.17832069851700 | T | T | T |
| 0.98346116367300 | 0.30203517141200 | 0.51045148982000 | T | T | T |
| 0.98345664625000 | 0.30202882106500 | 0.84377821008100 | T | T | T |
| 0.01774208557500 | 0.29975251591300 | 0.17796810834600 | T | T | T |
| 0.01695129894530 | 0.29898553734300 | 0.50993301934900 | T | T | T |
| 0.01694527374080 | 0.29902061452900 | 0.84326198972300 | T | T | T |
| 0.35089329956200 | 0.29885912768600 | 0.17681621404000 | T | T | T |
| 0.35027224039800 | 0.29903200627700 | 0.50991728453300 | T | T | T |
| 0.35026832476300 | 0.29903770570900 | 0.84328077713300 | T | T | T |
| 0.68361238070400 | 0.29894704684700 | 0.17662817778600 | T | T | T |
| 0.68361359912000 | 0.29903466421500 | 0.50992201883200 | T | T | T |
| 0.68360594893400 | 0.29899363617700 | 0.84329338532000 | T | T | T |
| 0.03191312938440 | 0.88672942481100 | 0.22428285424900 | T | T | T |
| 0.02975461734750 | 0.88654297252000 | 0.55510394958900 | T | T | T |
| 0.02973220948990 | 0.88654419107300 | 0.88847159001300 | T | T | T |
| 0.36301622517000 | 0.88631926038200 | 0.22192526117700 | T | T | T |
| 0.36308936150000 | 0.88652300498400 | 0.55510920174000 | T | T | T |
| 0.36308873908700 | 0.88650042215900 | 0.88851729435300 | T | T | T |
| 0.69640648170300 | 0.88652972228700 | 0.22177123608500 | T | T | T |
| 0.69641845775000 | 0.88653063943800 | 0.55512647290100 | T | T | T |
| 0.69641141176800 | 0.88652708587500 | 0.88847810806800 | T | T | T |
| 0.06370051987030 | 0.92695294776600 | 0.23993039902300 | T | T | T |

|                  |                  |                  |   |   |   |
|------------------|------------------|------------------|---|---|---|
| 0.06051966842650 | 0.92724787050400 | 0.57101811556100 | T | T | T |
| 0.06054763907500 | 0.92729084874700 | 0.90431140144300 | T | T | T |
| 0.39390443944400 | 0.92697593972800 | 0.23796928971900 | T | T | T |
| 0.39387517818600 | 0.92727469535000 | 0.57097231406700 | T | T | T |
| 0.39389268392900 | 0.92727814424400 | 0.90425844128500 | T | T | T |
| 0.72712318194500 | 0.92723965637700 | 0.23776356371700 | T | T | T |
| 0.72720074101000 | 0.92730479223600 | 0.57094382748100 | T | T | T |
| 0.72717666108100 | 0.92729329161100 | 0.90431155147800 | T | T | T |
| 0.00239762510650 | 0.89873168404800 | 0.24217810791500 | T | T | T |
| 0.00036552788877 | 0.89777542971800 | 0.57268791994900 | T | T | T |
| 0.00033500265170 | 0.89783118524500 | 0.90605103142300 | T | T | T |
| 0.33386198274000 | 0.89850703586900 | 0.23994103574300 | T | T | T |
| 0.33370597998800 | 0.89771729462300 | 0.57269562378900 | T | T | T |
| 0.33367082608700 | 0.89781139859300 | 0.90608842959100 | T | T | T |
| 0.66702855153800 | 0.89774947922800 | 0.23936413099500 | T | T | T |
| 0.66703395260800 | 0.89775303189900 | 0.57271956619200 | T | T | T |
| 0.66702021848700 | 0.89779547926900 | 0.90607145090600 | T | T | T |
| 0.00542238954390 | 0.91039676450700 | 0.20823038100800 | T | T | T |
| 0.00356890501953 | 0.91106828419900 | 0.53904867905800 | T | T | T |
| 0.00355037342817 | 0.91103316538900 | 0.87239967594800 | T | T | T |
| 0.33700826794000 | 0.91092642444300 | 0.20606846335700 | T | T | T |
| 0.33687856543800 | 0.91103017017600 | 0.53907030099200 | T | T | T |
| 0.33689099410700 | 0.91095251106300 | 0.87244357635700 | T | T | T |
| 0.67021562535500 | 0.91107912695600 | 0.20573684845000 | T | T | T |
| 0.67021607686500 | 0.91102697844700 | 0.53907756605300 | T | T | T |
| 0.67021673562500 | 0.91102129220100 | 0.87243315566500 | T | T | T |
| 0.01274946410710 | 0.93641986276200 | 0.27020921315600 | T | T | T |
| 0.01131821465990 | 0.93383195864200 | 0.60211731979200 | T | T | T |
| 0.01124866481600 | 0.93396608039300 | 0.93544872389900 | T | T | T |
| 0.34520862889000 | 0.93499338890800 | 0.26850816512300 | T | T | T |

|                  |                  |                  |   |   |   |
|------------------|------------------|------------------|---|---|---|
| 0.34466532269100 | 0.93384812327600 | 0.60209211723300 | T | T | T |
| 0.34455596621500 | 0.93401498777800 | 0.93545840914800 | T | T | T |
| 0.67799478022300 | 0.93380565889500 | 0.26880155889700 | T | T | T |
| 0.67799110360600 | 0.93384322668100 | 0.60211230145600 | T | T | T |
| 0.67795723750300 | 0.93391374674800 | 0.93545486253300 | T | T | T |
| 0.31225384469100 | 0.93641847628900 | 0.26398040132100 | T | T | T |
| 0.31179154482600 | 0.93513216758000 | 0.59758153851000 | T | T | T |
| 0.31168288314200 | 0.93539488742200 | 0.93077035467100 | T | T | T |
| 0.64511790691900 | 0.93516917196500 | 0.26424497437400 | T | T | T |
| 0.64511710393300 | 0.93515995676500 | 0.59757405194600 | T | T | T |
| 0.64507717232800 | 0.93526526870900 | 0.93085359294100 | T | T | T |
| 0.97978375112700 | 0.93605893678500 | 0.26571792688300 | T | T | T |
| 0.97844377632100 | 0.93515387070200 | 0.59757462404800 | T | T | T |
| 0.97836972460000 | 0.93532774810400 | 0.93079234667600 | T | T | T |
| 0.07838503266580 | 0.88005203779500 | 0.23754018826500 | T | T | T |
| 0.07348209942520 | 0.87920912468300 | 0.57228950822800 | T | T | T |
| 0.07345088690090 | 0.87923747273900 | 0.90568902002200 | T | T | T |
| 0.40690746881500 | 0.87899891953200 | 0.23902057050900 | T | T | T |
| 0.40680772915200 | 0.87922587029600 | 0.57232173053300 | T | T | T |
| 0.40678697504800 | 0.87922150354200 | 0.90571021783800 | T | T | T |
| 0.74014401134300 | 0.87923152173800 | 0.23897221939400 | T | T | T |
| 0.74013369920000 | 0.87926338659900 | 0.57235217368600 | T | T | T |
| 0.74013282676600 | 0.87926947865400 | 0.90568011113400 | T | T | T |
| 0.31752052809900 | 0.96037352014300 | 0.17666841206100 | T | T | T |
| 0.31661932179700 | 0.95891133950600 | 0.51009960979600 | T | T | T |
| 0.31664003628000 | 0.95889592399000 | 0.84344529986500 | T | T | T |
| 0.64998202991300 | 0.95909516775000 | 0.17677627043500 | T | T | T |
| 0.64996755709000 | 0.95892416341400 | 0.51007366729300 | T | T | T |
| 0.64997397110900 | 0.95900835863200 | 0.84344966855800 | T | T | T |
| 0.98424451374600 | 0.95835225815600 | 0.17804269825900 | T | T | T |

|                  |                  |                  |   |   |   |
|------------------|------------------|------------------|---|---|---|
| 0.9833333544900  | 0.95906206378800 | 0.51004157515900 | T | T | T |
| 0.98333287133800 | 0.95899139164200 | 0.84338419772000 | T | T | T |
| 0.01760028603030 | 0.96157684397000 | 0.17766465888400 | T | T | T |
| 0.01679371647120 | 0.96198407166000 | 0.50957108992900 | T | T | T |
| 0.01678234103640 | 0.96188533457300 | 0.84290409704800 | T | T | T |
| 0.35092951131900 | 0.96255316609300 | 0.17667716574900 | T | T | T |
| 0.35011598955200 | 0.96179260626700 | 0.50964071009000 | T | T | T |
| 0.35013518362700 | 0.96176153006800 | 0.84297330361800 | T | T | T |
| 0.68345140191000 | 0.96196955428600 | 0.17630796664100 | T | T | T |
| 0.68345526128800 | 0.96180540906600 | 0.50962017999700 | T | T | T |
| 0.68346938453900 | 0.96186597690700 | 0.84299807330300 | T | T | T |
| 0.22853276879900 | 0.29911317413800 | 0.18074067209200 | T | T | T |
| 0.23594141611100 | 0.36205992044000 | 0.48475073902200 | T | T | T |
| 0.23599756631500 | 0.36197891457700 | 0.81817753846000 | T | T | T |
| 0.56922523515500 | 0.36206380348200 | 0.15151964146800 | T | T | T |
| 0.56926740856800 | 0.36207061178800 | 0.48482712080800 | T | T | T |
| 0.56928367757400 | 0.36205530900900 | 0.81818242039700 | T | T | T |
| 0.90259529432900 | 0.36209627031200 | 0.15156002024400 | T | T | T |
| 0.90260252672000 | 0.36208272203900 | 0.48482673461600 | T | T | T |
| 0.90261886551100 | 0.36204433601500 | 0.81818001685400 | T | T | T |
| 0.22888406657400 | 0.96327989066700 | 0.18050911800200 | T | T | T |
| 0.23556156565700 | 0.90023131075700 | 0.48429379846900 | T | T | T |
| 0.23562750159600 | 0.90030458319400 | 0.81773324376300 | T | T | T |
| 0.56886182467600 | 0.90021476541500 | 0.15108043923400 | T | T | T |
| 0.56889958722600 | 0.90020303218300 | 0.48439201178900 | T | T | T |
| 0.56891176396600 | 0.90021542694700 | 0.81775116274500 | T | T | T |
| 0.90220814109900 | 0.90012501896800 | 0.15113403738100 | T | T | T |
| 0.90224939686800 | 0.90017955138900 | 0.48439184074000 | T | T | T |
| 0.90225583274800 | 0.90021839163900 | 0.81774060346800 | T | T | T |
| 0.23005735513300 | 0.38749485217000 | 0.21864672979800 | T | T | T |

|                  |                  |                  |   |   |   |
|------------------|------------------|------------------|---|---|---|
| 0.22166915608700 | 0.36953401539400 | 0.56740242386900 | T | T | T |
| 0.22167448556500 | 0.36954281967400 | 0.90073868928400 | T | T | T |
| 0.55501187313700 | 0.36955363053500 | 0.23407750160700 | T | T | T |
| 0.55500912325500 | 0.36952813914900 | 0.56740653846500 | T | T | T |
| 0.55500973137300 | 0.36952919607600 | 0.90074666660700 | T | T | T |
| 0.88831728606000 | 0.36952321813000 | 0.23408675623900 | T | T | T |
| 0.88833507029300 | 0.36952244929300 | 0.56741536672200 | T | T | T |
| 0.88834082875200 | 0.36953570945300 | 0.90073827282800 | T | T | T |
| 0.17263097674400 | 0.37683609423700 | 0.22454806126200 | T | T | T |
| 0.16709989606900 | 0.37636640193000 | 0.56065169982200 | T | T | T |
| 0.16709010521900 | 0.37636886742200 | 0.89402753524300 | T | T | T |
| 0.50043878870100 | 0.37637391201200 | 0.22733479682100 | T | T | T |
| 0.50043791375400 | 0.37637510294300 | 0.56068373978200 | T | T | T |
| 0.50042653182700 | 0.37637525270200 | 0.89403518692900 | T | T | T |
| 0.83377141958800 | 0.37636797802600 | 0.22734235930900 | T | T | T |
| 0.83376609928700 | 0.37637545503600 | 0.56068259202300 | T | T | T |
| 0.83376024906500 | 0.37636944097400 | 0.89403746922500 | T | T | T |
| 0.16720779847900 | 0.34613549298300 | 0.27524967726500 | T | T | T |
| 0.15950539201500 | 0.34264433646800 | 0.60542962538400 | T | T | T |
| 0.15952451890700 | 0.34259099028300 | 0.93877730697500 | T | T | T |
| 0.49281777386200 | 0.34262756020100 | 0.27210215145100 | T | T | T |
| 0.49283725680700 | 0.34262342969400 | 0.60543048728300 | T | T | T |
| 0.49281500222400 | 0.34260140897400 | 0.93876633160000 | T | T | T |
| 0.82617651863300 | 0.34261325760700 | 0.27210205349200 | T | T | T |
| 0.82616300659500 | 0.34263220894500 | 0.60543129366500 | T | T | T |
| 0.82616616337000 | 0.34259501614800 | 0.93876774905400 | T | T | T |
| 0.16786764083700 | 0.30588732462900 | 0.20009936196900 | T | T | T |
| 0.15940504682800 | 0.30639678012100 | 0.53027208622400 | T | T | T |
| 0.15937714621500 | 0.30645113407500 | 0.86360229467900 | T | T | T |
| 0.49273476010000 | 0.30638939957400 | 0.19695408531400 | T | T | T |



|                  |                  |                  |   |   |   |
|------------------|------------------|------------------|---|---|---|
| 0.49275194234900 | 0.30644135556300 | 0.53026724501800 | T | T | T |
| 0.49273595241700 | 0.30646205342300 | 0.86360343052600 | T | T | T |
| 0.82610931214500 | 0.30635141246600 | 0.19696245060700 | T | T | T |
| 0.82610049526700 | 0.30642245966600 | 0.53027815812700 | T | T | T |
| 0.82606416984400 | 0.30645266434800 | 0.86360865107300 | T | T | T |
| 0.23192524657900 | 0.87926318567100 | 0.22178446009700 | T | T | T |
| 0.22078127367400 | 0.89237072944800 | 0.56787172943800 | T | T | T |
| 0.22076578745000 | 0.89243221326900 | 0.90123134856200 | T | T | T |
| 0.55412173796200 | 0.89232887573400 | 0.23454433555000 | T | T | T |
| 0.55411999239400 | 0.89237903280500 | 0.56787546731300 | T | T | T |
| 0.55411379730500 | 0.89239821969500 | 0.90122520548900 | T | T | T |
| 0.88744196549400 | 0.89238742207400 | 0.23456170598100 | T | T | T |
| 0.88745064330100 | 0.89238405131500 | 0.56788377513300 | T | T | T |
| 0.88743936191700 | 0.89240217255200 | 0.90121960410200 | T | T | T |
| 0.17408399748300 | 0.88608171826800 | 0.22511201944300 | T | T | T |
| 0.16606988658200 | 0.88695303023500 | 0.56140718288200 | T | T | T |
| 0.16608760046300 | 0.88695463100600 | 0.89476520500300 | T | T | T |
| 0.49942027967200 | 0.88693807205700 | 0.22808844439600 | T | T | T |
| 0.49940858559600 | 0.88694670383600 | 0.56142532191800 | T | T | T |
| 0.49940800072100 | 0.88694801759500 | 0.89476804815000 | T | T | T |
| 0.83275676541100 | 0.88694200772800 | 0.22809419131000 | T | T | T |
| 0.83274122133200 | 0.88694485305600 | 0.56142639093200 | T | T | T |
| 0.83274826385800 | 0.88695260345500 | 0.89477133360300 | T | T | T |
| 0.16673178021400 | 0.91631452031700 | 0.27581772833200 | T | T | T |
| 0.15784256208600 | 0.91861975366500 | 0.60683408098500 | T | T | T |
| 0.15788328628400 | 0.91873575060800 | 0.94018944603500 | T | T | T |
| 0.49118903558700 | 0.91862043653600 | 0.27351561785900 | T | T | T |
| 0.49117747733400 | 0.91862983729700 | 0.60682908036500 | T | T | T |
| 0.49114947592700 | 0.91866149060600 | 0.94016568300600 | T | T | T |
| 0.82450997599700 | 0.91863862860200 | 0.27351004961600 | T | T | T |

|                  |                  |                  |   |   |   |
|------------------|------------------|------------------|---|---|---|
| 0.82450675848900 | 0.91863047155700 | 0.60683063476900 | T | T | T |
| 0.82451577442400 | 0.91868976184800 | 0.94017061443200 | T | T | T |
| 0.16773933101700 | 0.95577693982600 | 0.19992175869200 | T | T | T |
| 0.15882246879100 | 0.95590917516700 | 0.53017538654400 | T | T | T |
| 0.15879484172700 | 0.95583951210600 | 0.86349654868000 | T | T | T |
| 0.49214496546900 | 0.95586972479800 | 0.19681400645800 | T | T | T |
| 0.49217120637700 | 0.95588526034800 | 0.53017229187000 | T | T | T |
| 0.49215486365800 | 0.95584577638500 | 0.86349803373700 | T | T | T |
| 0.82553079380400 | 0.95592136846300 | 0.19687331605100 | T | T | T |
| 0.82551727048700 | 0.95588951418800 | 0.53018237425800 | T | T | T |
| 0.82548456148400 | 0.95584621814100 | 0.86350184356000 | T | T | T |
| 0.06355865787480 | 0.36504056158800 | 0.22993186423000 | T | T | T |
| 0.06139037487810 | 0.36308950663600 | 0.56289469466400 | T | T | T |
| 0.06140273122950 | 0.36309761029500 | 0.89624260170300 | T | T | T |
| 0.39484877630200 | 0.36310103881100 | 0.22974471243300 | T | T | T |
| 0.39472816452900 | 0.36309161858900 | 0.56287997518000 | T | T | T |
| 0.39472159695500 | 0.36312186437800 | 0.89622489409800 | T | T | T |
| 0.72805494342200 | 0.36304834844000 | 0.22959521163900 | T | T | T |
| 0.72806099792900 | 0.36309100892000 | 0.56288318045100 | T | T | T |
| 0.72805304677400 | 0.36309871455200 | 0.89623087886400 | T | T | T |
| 0.00981661827999 | 0.37597523016100 | 0.22235424885400 | T | T | T |
| 0.00805216843108 | 0.37505843590200 | 0.55321539941100 | T | T | T |
| 0.00803223249572 | 0.37503622909000 | 0.88657550519800 | T | T | T |
| 0.34125606820000 | 0.37518013820300 | 0.22029293966100 | T | T | T |
| 0.34138427247000 | 0.37507594077400 | 0.55321650525100 | T | T | T |
| 0.34137361735900 | 0.37512201164500 | 0.88659431198800 | T | T | T |
| 0.67471170081600 | 0.37506476759300 | 0.21988806480800 | T | T | T |
| 0.67471289131100 | 0.37506552883700 | 0.55323453197000 | T | T | T |
| 0.67470248831900 | 0.37507899259900 | 0.88658853011100 | T | T | T |
| 0.32895594089300 | 0.34621323068900 | 0.26549218038500 | T | T | T |

|                  |                  |                  |   |   |   |
|------------------|------------------|------------------|---|---|---|
| 0.32888794568600 | 0.34711652349900 | 0.59889545626800 | T | T | T |
| 0.32886845902000 | 0.34705557362300 | 0.93222519565400 | T | T | T |
| 0.66219896938400 | 0.34711349991900 | 0.26555556561100 | T | T | T |
| 0.66220662406500 | 0.34710759971400 | 0.59889260088800 | T | T | T |
| 0.66219297840200 | 0.34704276152500 | 0.93221830132300 | T | T | T |
| 0.99671745461100 | 0.34592802904300 | 0.26706858252100 | T | T | T |
| 0.99553755210100 | 0.34710922999800 | 0.59889194962500 | T | T | T |
| 0.99550786695900 | 0.34704758793900 | 0.93222048821600 | T | T | T |
| 0.00138362373399 | 0.30765177399500 | 0.19027647322600 | T | T | T |
| 0.00049903410165 | 0.30703726863000 | 0.52232760193300 | T | T | T |
| 0.00049303960332 | 0.30708102607700 | 0.85564650211200 | T | T | T |
| 0.33424062538600 | 0.30674972097000 | 0.18904328976400 | T | T | T |
| 0.33382217988200 | 0.30707382391200 | 0.52230566771100 | T | T | T |
| 0.33381643568400 | 0.30711464420700 | 0.85565237906500 | T | T | T |
| 0.66715908438100 | 0.30701083217100 | 0.18902839786000 | T | T | T |
| 0.66716193520500 | 0.30708787990300 | 0.52230676849700 | T | T | T |
| 0.66714993723400 | 0.30705400201500 | 0.85567296828700 | T | T | T |
| 0.06356843040520 | 0.89881063047000 | 0.22973827695300 | T | T | T |
| 0.06136617178950 | 0.89844632407000 | 0.56140283913500 | T | T | T |
| 0.06137644779650 | 0.89845126827900 | 0.89474434055900 | T | T | T |
| 0.39488416694600 | 0.89840450701100 | 0.22814111304200 | T | T | T |
| 0.39471089398800 | 0.89844976261300 | 0.56139139171500 | T | T | T |
| 0.39470515590000 | 0.89840884196200 | 0.89473556835900 | T | T | T |
| 0.72802236812000 | 0.89848572184100 | 0.22809539647600 | T | T | T |
| 0.72804433443500 | 0.89844544365300 | 0.56139255286600 | T | T | T |
| 0.72803291898100 | 0.89844916378800 | 0.89474451368500 | T | T | T |
| 0.00992679030139 | 0.88675222059200 | 0.22229908219100 | T | T | T |
| 0.00779358713151 | 0.88652405779200 | 0.55290295567100 | T | T | T |
| 0.00777689958674 | 0.88651364168400 | 0.88627507577500 | T | T | T |
| 0.34110973939600 | 0.88664664160100 | 0.21992520992600 | T | T | T |

|                  |                  |                  |   |   |   |
|------------------|------------------|------------------|---|---|---|
| 0.34112886779900 | 0.88647008831300 | 0.55291900482100 | T | T | T |
| 0.34112445426000 | 0.88644328322000 | 0.88631426499000 | T | T | T |
| 0.67444916004400 | 0.88650462407900 | 0.21957798440100 | T | T | T |
| 0.67445903201600 | 0.88648329235800 | 0.55293632696700 | T | T | T |
| 0.67444939181000 | 0.88649099066300 | 0.88628878765600 | T | T | T |
| 0.32873300406000 | 0.91484907667300 | 0.26539805054200 | T | T | T |
| 0.32828130686800 | 0.91366408747300 | 0.59879081192100 | T | T | T |
| 0.32815287052200 | 0.91390297059400 | 0.93207989451900 | T | T | T |
| 0.66160070121100 | 0.91366499972200 | 0.26544321953100 | T | T | T |
| 0.66160339802700 | 0.91367496646600 | 0.59878550760000 | T | T | T |
| 0.66155860450900 | 0.91377931023100 | 0.93209609426700 | T | T | T |
| 0.99660928123600 | 0.91543090488400 | 0.26741119396700 | T | T | T |
| 0.99493153564900 | 0.91367518146400 | 0.59877410282900 | T | T | T |
| 0.99484761168900 | 0.91384956504000 | 0.93208177077800 | T | T | T |
| 0.00123127464523 | 0.95369391249200 | 0.18991793499900 | T | T | T |
| 0.00034847116209 | 0.95397847855200 | 0.52189625648800 | T | T | T |
| 0.00034691723394 | 0.95385534939900 | 0.85522182793800 | T | T | T |
| 0.33425025145100 | 0.95499755104700 | 0.18884991665500 | T | T | T |
| 0.33364154189200 | 0.95386447430300 | 0.52195073869700 | T | T | T |
| 0.33366812092300 | 0.95380316740300 | 0.85527365787700 | T | T | T |
| 0.66699609592800 | 0.95399341641900 | 0.18863877798600 | T | T | T |
| 0.66698547216200 | 0.95384109513000 | 0.52192383361400 | T | T | T |
| 0.66699237011400 | 0.95393043306300 | 0.85530344009100 | T | T | T |
| 0.24517232995500 | 0.30646170751000 | 0.19279293575600 | T | T | T |
| 0.20841129665600 | 0.31811526845400 | 0.50980731258500 | T | T | T |
| 0.20840591699200 | 0.31809560045800 | 0.84315023615300 | T | T | T |
| 0.54175229411300 | 0.31806737162500 | 0.17652992480800 | T | T | T |
| 0.54178855427200 | 0.31808369347600 | 0.50984086686800 | T | T | T |
| 0.54177218237700 | 0.31808702005500 | 0.84317046532300 | T | T | T |
| 0.87511168681400 | 0.31807460740200 | 0.17653908265500 | T | T | T |

|                  |                  |                  |   |   |   |
|------------------|------------------|------------------|---|---|---|
| 0.87512299119600 | 0.31808081854400 | 0.50984479791300 | T | T | T |
| 0.87507178200300 | 0.31811274859200 | 0.84315247444600 | T | T | T |
| 0.24554921739500 | 0.95662696764900 | 0.19268075042300 | T | T | T |
| 0.23433619119600 | 0.33546052994700 | 0.47343761213500 | T | T | T |
| 0.23433941469300 | 0.33546524731200 | 0.80679386720400 | T | T | T |
| 0.56759192923400 | 0.33555294657500 | 0.14013035212800 | T | T | T |
| 0.56761561452000 | 0.33556742327400 | 0.47343355359200 | T | T | T |
| 0.56763177159900 | 0.33556043097100 | 0.80678372243800 | T | T | T |
| 0.90100668976200 | 0.33557484203400 | 0.14018096204300 | T | T | T |
| 0.90093958221900 | 0.33557972837800 | 0.47343515650500 | T | T | T |
| 0.90096402139700 | 0.33554689897200 | 0.80678277826400 | T | T | T |
| 0.20542853048500 | 0.45350851305900 | 0.16183899086900 | T | T | T |
| 0.20750053793700 | 0.94292183694100 | 0.50950920794900 | T | T | T |
| 0.20755255036200 | 0.94303192815700 | 0.84286651076700 | T | T | T |
| 0.54082133165900 | 0.94295391535900 | 0.17621390981300 | T | T | T |
| 0.54087475509000 | 0.94295228179800 | 0.50953585678100 | T | T | T |
| 0.54088035848200 | 0.94298386345900 | 0.84287539699100 | T | T | T |
| 0.87419975664800 | 0.94294890727400 | 0.17624562865100 | T | T | T |
| 0.87420284652600 | 0.94292987006600 | 0.50952966645600 | T | T | T |
| 0.87420100444300 | 0.94296991033800 | 0.84284911508400 | T | T | T |
| 0.20551985042600 | 0.81403526091400 | 0.16263780604100 | T | T | T |
| 0.23436423618600 | 0.92742295360400 | 0.47347663587400 | T | T | T |
| 0.23436744267700 | 0.92739439160300 | 0.80682386590700 | T | T | T |
| 0.56767133764900 | 0.92733539995700 | 0.14019202657600 | T | T | T |
| 0.56767591776300 | 0.92730175543400 | 0.47348684741100 | T | T | T |
| 0.56767315734300 | 0.92729189844400 | 0.80682825745500 | T | T | T |
| 0.90103911116800 | 0.92723030160900 | 0.14023453834300 | T | T | T |
| 0.90105065331800 | 0.92730540117900 | 0.47350784762300 | T | T | T |
| 0.90105858584100 | 0.92732516201000 | 0.80683955068100 | T | T | T |
| 0.21433993205400 | 0.41857267117400 | 0.15955102520300 | T | T | T |

|                  |                  |                  |   |   |   |
|------------------|------------------|------------------|---|---|---|
| 0.21751375158600 | 0.30688009517400 | 0.48717333445600 | T | T | T |
| 0.21750222521500 | 0.30686638276100 | 0.82051798838900 | T | T | T |
| 0.55080120827500 | 0.30689431839000 | 0.15385866119000 | T | T | T |
| 0.55082390387400 | 0.30691733327000 | 0.48716765224000 | T | T | T |
| 0.55082849947200 | 0.30691073760700 | 0.82050951195800 | T | T | T |
| 0.88423430304800 | 0.30687751877600 | 0.15389696740900 | T | T | T |
| 0.88415327260200 | 0.30692772220800 | 0.48716839566300 | T | T | T |
| 0.88414783587800 | 0.30691515030100 | 0.82050354569300 | T | T | T |
| 0.21538783093100 | 0.84857258727600 | 0.16190782917800 | T | T | T |
| 0.21723162020800 | 0.95539159791600 | 0.48732761611700 | T | T | T |
| 0.21724060289700 | 0.95541971788500 | 0.82065522612400 | T | T | T |
| 0.55054070494400 | 0.95537633179500 | 0.15400830829500 | T | T | T |
| 0.55056123454800 | 0.95534703450400 | 0.48731840403900 | T | T | T |
| 0.55056081142500 | 0.95535304674300 | 0.82065183936600 | T | T | T |
| 0.88395866036200 | 0.95534704756900 | 0.15405207557400 | T | T | T |
| 0.88391974539800 | 0.95533748330100 | 0.48732807766100 | T | T | T |
| 0.88392212558700 | 0.95536741318500 | 0.82064943605600 | T | T | T |

**D. Catalytic reaction of  $\text{CO}_2 + \text{H}^+_{\text{sol}} + \text{e}^- \rightarrow \text{*COOH}$  on the semiconductor GaP surface**

**1) Small supercell IS**

POSCAR

1

15.60575999998655 0.00000000000000 0.00000000000000  
0.0000000000000000 16.55240999999278 0.0000000000000000  
0.0000000000000000 0.0000000000000000 30.38812199999634

Ga P H O C

60 60 18 12 2

Direct

|                  |                  |                  |   |   |   |
|------------------|------------------|------------------|---|---|---|
| 0.00190734900391 | 0.02243686119700 | 0.01594161579310 | T | T | T |
| 0.99744388323200 | 0.68997822250300 | 0.01585321179090 | T | T | T |
| 0.99741136353100 | 0.35451269569800 | 0.01579589699140 | T | T | T |
| 0.50194228597900 | 0.02700266997820 | 0.01586548293550 | T | T | T |
| 0.49689398336800 | 0.67781020993400 | 0.01537363889750 | T | T | T |
| 0.49685869891600 | 0.35371841442200 | 0.01613033428700 | T | T | T |
| 0.25038979882500 | 0.02246874511280 | 0.01596861036590 | T | T | T |
| 0.24417054418600 | 0.68967897191300 | 0.01592186757690 | T | T | T |
| 0.24470681451100 | 0.35437143765900 | 0.01579356803470 | T | T | T |
| 0.75083348750500 | 0.02284124124210 | 0.01599514709160 | T | T | T |
| 0.75077481538600 | 0.68936096876900 | 0.01899441921010 | T | T | T |
| 0.75025136029000 | 0.35800496768300 | 0.01590777354750 | T | T | T |
| 0.37532046349800 | 0.16324708103800 | 0.06408722517850 | T | T | T |
| 0.37590664429700 | 0.83241314084800 | 0.06443884714310 | T | T | T |
| 0.37144685190900 | 0.49644221363500 | 0.06449094231160 | T | T | T |
| 0.87537019358400 | 0.16389957280800 | 0.06404424584110 | T | T | T |
| 0.87586283989700 | 0.83005330204900 | 0.06424775993310 | T | T | T |
| 0.87591621574600 | 0.49661442096900 | 0.06420753187000 | T | T | T |
| 0.12429939376800 | 0.16383182538100 | 0.06411493070820 | T | T | T |
| 0.12416283407000 | 0.82939754686000 | 0.06420019444410 | T | T | T |
| 0.12342744315300 | 0.49659443729900 | 0.06412271010620 | T | T | T |
| 0.62492234873700 | 0.16454427544200 | 0.06415474581680 | T | T | T |
| 0.62405595429900 | 0.83357468117600 | 0.06477923125430 | T | T | T |
| 0.62360046052600 | 0.49674225332200 | 0.06476629566690 | T | T | T |
| 0.00000000000000 | 0.00000000000000 | 0.13043999673400 | F | F | F |
| 0.00000000000000 | 0.66667002414000 | 0.13043999673400 | F | F | F |
| 0.00000000000000 | 0.33333000540000 | 0.13043999673400 | F | F | F |
| 0.50000000002500 | 0.00000000000000 | 0.13043999673400 | F | F | F |
| 0.50000000002500 | 0.66667002414000 | 0.13043999673400 | F | F | F |
| 0.50000000002500 | 0.33333000540000 | 0.13043999673400 | F | F | F |

|                  |                  |                  |   |   |   |
|------------------|------------------|------------------|---|---|---|
| 0.2499999998000  | 0.0000000000000  | 0.13043999673400 | F | F | F |
| 0.2499999998000  | 0.66667002414000 | 0.13043999673400 | F | F | F |
| 0.2499999998000  | 0.33333000540000 | 0.13043999673400 | F | F | F |
| 0.75000000026600 | 0.0000000000000  | 0.13043999673400 | F | F | F |
| 0.75000000026600 | 0.66667002414000 | 0.13043999673400 | F | F | F |
| 0.75000000026600 | 0.33333000540000 | 0.13043999673400 | F | F | F |
| 0.37572639200700 | 0.16410401919100 | 0.19673444260600 | T | T | T |
| 0.37576305497100 | 0.82937545794700 | 0.19659646701800 | T | T | T |
| 0.37574597457900 | 0.49692184766900 | 0.19623188316500 | T | T | T |
| 0.87615215307700 | 0.16452792804400 | 0.19673096166900 | T | T | T |
| 0.87562130641800 | 0.82987089658500 | 0.19657165169600 | T | T | T |
| 0.87606692256100 | 0.49709664816100 | 0.19648032714700 | T | T | T |
| 0.12480608755900 | 0.16472569618400 | 0.19666181709800 | T | T | T |
| 0.12420820756900 | 0.82960322985200 | 0.19653817571100 | T | T | T |
| 0.12429361029900 | 0.49716293368300 | 0.19646274814900 | T | T | T |
| 0.62599226573800 | 0.16423729822600 | 0.19666457868900 | T | T | T |
| 0.62420342167800 | 0.82995800202400 | 0.19652463976800 | T | T | T |
| 0.62456432088200 | 0.49694665514600 | 0.19617928537600 | T | T | T |
| 0.00197881503717 | 0.02253494327630 | 0.24470102805000 | T | T | T |
| 0.99753501772600 | 0.69013721253300 | 0.24483588074700 | T | T | T |
| 0.00275926645006 | 0.35838685192400 | 0.24481672245400 | T | T | T |
| 0.50188671896500 | 0.02290126833650 | 0.24465857261300 | T | T | T |
| 0.49729851416700 | 0.67784882067800 | 0.24820929299000 | T | T | T |
| 0.50260159751000 | 0.35387758669400 | 0.24470436796700 | T | T | T |
| 0.25048815146300 | 0.02231644633600 | 0.24458348253000 | T | T | T |
| 0.24420394648600 | 0.68917315033100 | 0.24475688039300 | T | T | T |
| 0.25003353620600 | 0.35842580348400 | 0.24480862040600 | T | T | T |
| 0.75078546296000 | 0.02246403767710 | 0.24458110052400 | T | T | T |
| 0.75060386542600 | 0.68926234923700 | 0.24443355765600 | T | T | T |
| 0.75531258941300 | 0.35843427390100 | 0.24482341355400 | T | T | T |



|                  |                  |                  |   |   |   |
|------------------|------------------|------------------|---|---|---|
| 0.37515763737500 | 0.09241010249430 | 0.99511786802300 | T | T | T |
| 0.37392884706500 | 0.75373007534000 | 0.99759703214300 | T | T | T |
| 0.37241815406900 | 0.42354833936700 | 0.99582181706900 | T | T | T |
| 0.87624621839200 | 0.09120200007180 | 0.99542155328700 | T | T | T |
| 0.87247048239400 | 0.75849626710300 | 0.99518800030500 | T | T | T |
| 0.87436268132300 | 0.42632515281900 | 0.99477443200700 | T | T | T |
| 0.12599663974800 | 0.09202817968680 | 0.99519857691600 | T | T | T |
| 0.12179675288000 | 0.75960205130200 | 0.99458510972100 | T | T | T |
| 0.12191198820200 | 0.42488284139400 | 0.99502208938200 | T | T | T |
| 0.62717846907300 | 0.09357384690850 | 0.99496115325000 | T | T | T |
| 0.62205725023500 | 0.75333992057700 | 0.99848809934100 | T | T | T |
| 0.62162787442300 | 0.42422268090500 | 0.99630652525000 | T | T | T |
| 0.99957153429400 | 0.24785140080700 | 0.06675941583760 | T | T | T |
| 0.00039548028570 | 0.91450417196900 | 0.06657924366860 | T | T | T |
| 0.99929747005100 | 0.58192118799200 | 0.06639421255370 | T | T | T |
| 0.49948741003400 | 0.24755339088700 | 0.06695365774990 | T | T | T |
| 0.50002527604700 | 0.91690264714300 | 0.06583152570190 | T | T | T |
| 0.49791124344400 | 0.57822348290400 | 0.06904191377160 | T | T | T |
| 0.24996465488600 | 0.24764485799700 | 0.06675689954130 | T | T | T |
| 0.24963033504300 | 0.91412698424900 | 0.06638638812100 | T | T | T |
| 0.24789974442900 | 0.58159185334400 | 0.06636887187800 | T | T | T |
| 0.74975201454600 | 0.24913062199000 | 0.06624495581950 | T | T | T |
| 0.75060211211900 | 0.91448769355500 | 0.06639104415680 | T | T | T |
| 0.74945886928700 | 0.57960997262500 | 0.06736031049910 | T | T | T |
| 0.12500000002200 | 0.08332999798400 | 0.13043999673400 | F | F | F |
| 0.12500000002200 | 0.74999999984900 | 0.13043999673400 | F | F | F |
| 0.12500000002200 | 0.41666999457100 | 0.13043999673400 | F | F | F |
| 0.62499999998400 | 0.08332999798400 | 0.13043999673400 | F | F | F |
| 0.62499999998400 | 0.74999999984900 | 0.13043999673400 | F | F | F |
| 0.62499999998400 | 0.41666999457100 | 0.13043999673400 | F | F | F |

|                  |                  |                  |   |   |   |
|------------------|------------------|------------------|---|---|---|
| 0.3750000000400  | 0.08332999798400 | 0.13043999673400 | F | F | F |
| 0.3750000000400  | 0.7499999984900  | 0.13043999673400 | F | F | F |
| 0.3750000000400  | 0.41666999457100 | 0.13043999673400 | F | F | F |
| 0.87500000009500 | 0.08332999798400 | 0.13043999673400 | F | F | F |
| 0.87500000009500 | 0.7499999984900  | 0.13043999673400 | F | F | F |
| 0.87500000009500 | 0.41666999457100 | 0.13043999673400 | F | F | F |
| 0.00065913891276 | 0.24938225540500 | 0.19466447298800 | T | T | T |
| 0.00019725046749 | 0.91435594475800 | 0.19428611215900 | T | T | T |
| 0.99982305603100 | 0.58208864205500 | 0.19436206182200 | T | T | T |
| 0.50093401851200 | 0.24761754753500 | 0.19399696431200 | T | T | T |
| 0.50013449321000 | 0.91394818118800 | 0.19456538925300 | T | T | T |
| 0.50012391191100 | 0.58027331968700 | 0.19302485526400 | T | T | T |
| 0.25080556696700 | 0.24914180013100 | 0.19474066321800 | T | T | T |
| 0.25018189153400 | 0.91336036736000 | 0.19446551007100 | T | T | T |
| 0.24989715416800 | 0.58114497602500 | 0.19431012471900 | T | T | T |
| 0.75076454220800 | 0.24929841093400 | 0.19473574935400 | T | T | T |
| 0.74987608897300 | 0.91347302956100 | 0.19447846461900 | T | T | T |
| 0.74986858582500 | 0.58102573368300 | 0.19432001106700 | T | T | T |
| 0.37609936625100 | 0.09100672508820 | 0.26522570796300 | T | T | T |
| 0.37331164785400 | 0.75329682182600 | 0.26457902470200 | T | T | T |
| 0.37824151074700 | 0.42466066631800 | 0.26513849170700 | T | T | T |
| 0.87616051091800 | 0.09109663212300 | 0.26520489972100 | T | T | T |
| 0.87334776458000 | 0.75918110922000 | 0.26617576933600 | T | T | T |
| 0.87817220332500 | 0.42779347020300 | 0.26620024944200 | T | T | T |
| 0.12618009036700 | 0.09202068508600 | 0.26542587164400 | T | T | T |
| 0.12202457039700 | 0.75941519914000 | 0.26614415228300 | T | T | T |
| 0.12660053696100 | 0.42787016312300 | 0.26618257599400 | T | T | T |
| 0.62627566085800 | 0.09183705575130 | 0.26553300920200 | T | T | T |
| 0.62215065760400 | 0.75391488421900 | 0.26511238355300 | T | T | T |
| 0.62634763111600 | 0.42467614992500 | 0.26505898286400 | T | T | T |

|                  |                  |                  |   |   |   |
|------------------|------------------|------------------|---|---|---|
| 0.59007547082800 | 0.67303127457500 | 0.37780238773900 | T | T | T |
| 0.68451429938300 | 0.72519348080900 | 0.33799293276900 | T | T | T |
| 0.50117343197400 | 0.72458844425100 | 0.36545972070600 | T | T | T |
| 0.51219191052500 | 0.62375978670300 | 0.35346177862500 | T | T | T |
| 0.53269253804400 | 0.81191855007000 | 0.32859735321900 | T | T | T |
| 0.43414134371300 | 0.79687676311300 | 0.32754136651400 | T | T | T |
| 0.72445158376800 | 0.72349746508700 | 0.38597859317400 | T | T | T |
| 0.45059685253200 | 0.53530628622100 | 0.30231290598400 | T | T | T |
| 0.55084447859500 | 0.53528352118400 | 0.30053433634000 | T | T | T |
| 0.59637018688000 | 0.67129367263100 | 0.88859157886100 | T | T | T |
| 0.68870216637600 | 0.72068300875900 | 0.92963365889300 | T | T | T |
| 0.50839148352100 | 0.72625290561200 | 0.89988818425300 | T | T | T |
| 0.51480826345600 | 0.62451247548500 | 0.91105105881200 | T | T | T |
| 0.53975220318800 | 0.80961642586800 | 0.93848295318700 | T | T | T |
| 0.44045801314600 | 0.79803612955300 | 0.93693081890200 | T | T | T |
| 0.73426454047700 | 0.71514413849100 | 0.88315017923400 | T | T | T |
| 0.44781786751400 | 0.53667252770500 | 0.96088812285000 | T | T | T |
| 0.54803347677900 | 0.53453993860500 | 0.96345845387500 | T | T | T |
| 0.68436144293000 | 0.69566268502200 | 0.36645835791900 | T | T | T |
| 0.52433793028900 | 0.66566190745700 | 0.37722715515400 | T | T | T |
| 0.48378953793300 | 0.80145503704200 | 0.34873269483500 | T | T | T |
| 0.50112811427200 | 0.57170983410600 | 0.30744078254100 | T | T | T |
| 0.69105156430400 | 0.68933751343900 | 0.90171788879500 | T | T | T |
| 0.53035568840700 | 0.66656759648700 | 0.88790709101000 | T | T | T |
| 0.49201798482900 | 0.80240943811800 | 0.91697459922400 | T | T | T |
| 0.49920925955300 | 0.57217762992900 | 0.95653295332600 | T | T | T |
| 0.65815827162000 | 0.35189283312400 | 0.39096725523600 | T | T | T |
| 0.67194430978500 | 0.35173588352500 | 0.88381404862400 | T | T | T |
| 0.61642987554200 | 0.48850716656600 | 0.39412475003900 | T | T | T |
| 0.61666064940000 | 0.48343083553200 | 0.87642034181300 | T | T | T |

|                  |                  |                  |   |   |   |
|------------------|------------------|------------------|---|---|---|
| 0.63744649376100 | 0.42015054094500 | 0.39236968004200 | T | T | T |
| 0.64442120624900 | 0.41759115799900 | 0.88043234707800 | T | T | T |

## 2) Small supercell FS

POSCAR

1

|                   |                   |                   |
|-------------------|-------------------|-------------------|
| 15.60575999998655 | 0.00000000000000  | 0.00000000000000  |
| 0.00000000000000  | 16.55240999999278 | 0.00000000000000  |
| 0.00000000000000  | 0.00000000000000  | 30.38812199999634 |

Ga P H O C

60 60 18 12 2

Direct

|                  |                  |                  |   |   |   |
|------------------|------------------|------------------|---|---|---|
| 0.00192375232798 | 0.02234471358210 | 0.01570323740910 | T | T | T |
| 0.99723184633400 | 0.68999482502000 | 0.01549850890060 | T | T | T |
| 0.00327870762653 | 0.35348063547000 | 0.01562231792550 | T | T | T |
| 0.50138178839300 | 0.02223148228090 | 0.01567665494340 | T | T | T |
| 0.49643471099800 | 0.67257598897700 | 0.00844498271699 | T | T | T |
| 0.48926572953400 | 0.32815680152600 | 0.99806611102200 | T | T | T |
| 0.25071613695400 | 0.02195781683730 | 0.01571884668740 | T | T | T |
| 0.24426573840500 | 0.68926701219600 | 0.01579914657280 | T | T | T |
| 0.25014864507200 | 0.35904955752100 | 0.01519768420330 | T | T | T |
| 0.75037387526000 | 0.02185385528390 | 0.01580133601150 | T | T | T |
| 0.74872072727000 | 0.68382319247500 | 0.01295908868030 | T | T | T |
| 0.76298004369600 | 0.35240718941100 | 0.01615541079660 | T | T | T |
| 0.37720739540700 | 0.16536413970400 | 0.06435263205580 | T | T | T |
| 0.37544827223600 | 0.82976960437900 | 0.06438808003630 | T | T | T |
| 0.37593574836100 | 0.49579601585300 | 0.06422663717160 | T | T | T |
| 0.87656427525800 | 0.16421018971900 | 0.06425751645890 | T | T | T |
| 0.87449222195900 | 0.82968886994600 | 0.06407674341850 | T | T | T |
| 0.87588095794000 | 0.49772677617100 | 0.06431385827460 | T | T | T |

|                  |                  |                  |   |   |   |
|------------------|------------------|------------------|---|---|---|
| 0.12817369935900 | 0.16506591494300 | 0.06423930820570 | T | T | T |
| 0.12399440166100 | 0.83257839008900 | 0.06446822835920 | T | T | T |
| 0.12428351190100 | 0.49768151263900 | 0.06432707824340 | T | T | T |
| 0.62295619434900 | 0.16500174360800 | 0.06417828264820 | T | T | T |
| 0.62398987648500 | 0.82911389696000 | 0.06387793442210 | T | T | T |
| 0.62465849277300 | 0.50270096910800 | 0.06761039003460 | T | T | T |
| 0.00000000000000 | 0.00000000000000 | 0.13043999673400 | F | F | F |
| 0.00000000000000 | 0.66667002414000 | 0.13043999673400 | F | F | F |
| 0.00000000000000 | 0.33333000540400 | 0.13043999673400 | F | F | F |
| 0.50000000002500 | 0.00000000000000 | 0.13043999673400 | F | F | F |
| 0.50000000002500 | 0.66667002414000 | 0.13043999673400 | F | F | F |
| 0.50000000002500 | 0.33333000540400 | 0.13043999673400 | F | F | F |
| 0.24999999998000 | 0.00000000000000 | 0.13043999673400 | F | F | F |
| 0.24999999998000 | 0.66667002414000 | 0.13043999673400 | F | F | F |
| 0.24999999998000 | 0.33333000540400 | 0.13043999673400 | F | F | F |
| 0.75000000026700 | 0.00000000000000 | 0.13043999673400 | F | F | F |
| 0.75000000026700 | 0.66667002414000 | 0.13043999673400 | F | F | F |
| 0.75000000026700 | 0.33333000540400 | 0.13043999673400 | F | F | F |
| 0.37713844257200 | 0.16538838441800 | 0.19632428580400 | T | T | T |
| 0.37562299220600 | 0.82924517087300 | 0.19656927497800 | T | T | T |
| 0.37631765901400 | 0.49612989602000 | 0.19656567527100 | T | T | T |
| 0.87654316088400 | 0.16432339903700 | 0.19643829563700 | T | T | T |
| 0.87435780733300 | 0.82975383739500 | 0.19664231396000 | T | T | T |
| 0.87583635320100 | 0.49779943855200 | 0.19638269596800 | T | T | T |
| 0.12817089157800 | 0.16508398084600 | 0.19645620315600 | T | T | T |
| 0.12396836229700 | 0.83271036828200 | 0.19621320866400 | T | T | T |
| 0.12435631261600 | 0.49777474634200 | 0.19636081481500 | T | T | T |
| 0.62297917022100 | 0.16493992870300 | 0.19654604145500 | T | T | T |
| 0.62385132876100 | 0.82850209666000 | 0.19871707155900 | T | T | T |
| 0.62420823974900 | 0.50283454458800 | 0.19331330325300 | T | T | T |

|                  |                  |                  |   |   |   |
|------------------|------------------|------------------|---|---|---|
| 0.00179594439867 | 0.02244470411130 | 0.24492926237600 | T | T | T |
| 0.99729089347200 | 0.69009296276900 | 0.24513208055500 | T | T | T |
| 0.00331283997174 | 0.35359673305000 | 0.24502105571300 | T | T | T |
| 0.50049980634300 | 0.02228773463980 | 0.24495115887400 | T | T | T |
| 0.49641135588600 | 0.67289456816900 | 0.25492442764800 | T | T | T |
| 0.48931382816200 | 0.32856615141000 | 0.26238154693200 | T | T | T |
| 0.25059491307300 | 0.02197662634770 | 0.24490700816100 | T | T | T |
| 0.24466691294900 | 0.68957228444700 | 0.24499972377700 | T | T | T |
| 0.25021395647700 | 0.35903328375700 | 0.24559876863200 | T | T | T |
| 0.75031693994500 | 0.02193745084550 | 0.24485508829700 | T | T | T |
| 0.74876455157700 | 0.68398712074100 | 0.24806763339500 | T | T | T |
| 0.76297725443500 | 0.35252706027900 | 0.24464652883100 | T | T | T |
| 0.37605269058900 | 0.09221818692420 | 0.99587576484900 | T | T | T |
| 0.37231152880000 | 0.75494904006700 | 0.99815208224600 | T | T | T |
| 0.37456580770300 | 0.42716691652100 | 0.99483861587300 | T | T | T |
| 0.87591150045600 | 0.09175814789990 | 0.99582763156700 | T | T | T |
| 0.87242768859500 | 0.75814082827900 | 0.99478129791500 | T | T | T |
| 0.88034141302200 | 0.42630392877600 | 0.99458294397900 | T | T | T |
| 0.12621472271700 | 0.09254360445200 | 0.99557912840700 | T | T | T |
| 0.12141917565500 | 0.76052402786700 | 0.99550207288500 | T | T | T |
| 0.12451490547600 | 0.42658650227500 | 0.99535647548700 | T | T | T |
| 0.62595861630600 | 0.09251112064060 | 0.99555066198900 | T | T | T |
| 0.62153125372600 | 0.75353257758700 | 0.99622317592700 | T | T | T |
| 0.62649643244600 | 0.41264622880000 | 0.00479149987273 | T | T | T |
| 0.00159232341654 | 0.24750925550200 | 0.06675638604040 | T | T | T |
| 0.99889234033300 | 0.91496043535100 | 0.06637867538670 | T | T | T |
| 0.99966842498700 | 0.58204218373400 | 0.06625751346390 | T | T | T |
| 0.50096045604100 | 0.25132032688000 | 0.06553192017890 | T | T | T |
| 0.50016155851500 | 0.91418028948600 | 0.06629071878190 | T | T | T |
| 0.49855129779800 | 0.58107037251800 | 0.06769495383150 | T | T | T |

|                  |                  |                  |   |   |   |
|------------------|------------------|------------------|---|---|---|
| 0.25185582120200 | 0.25000462686700 | 0.06585453110490 | T | T | T |
| 0.25033774533600 | 0.91457053270900 | 0.06657561008950 | T | T | T |
| 0.24967625750700 | 0.58111999479100 | 0.06640559095360 | T | T | T |
| 0.75074106030600 | 0.24730296919400 | 0.06695437704310 | T | T | T |
| 0.74940168485000 | 0.91373676178700 | 0.06633917268480 | T | T | T |
| 0.75118718954900 | 0.58217908162400 | 0.06711656945380 | T | T | T |
| 0.12500000002000 | 0.08332999798400 | 0.13043999673400 | F | F | F |
| 0.12500000002000 | 0.7499999984700  | 0.13043999673400 | F | F | F |
| 0.12500000002000 | 0.41666999457100 | 0.13043999673400 | F | F | F |
| 0.6249999998400  | 0.08332999798400 | 0.13043999673400 | F | F | F |
| 0.6249999998400  | 0.7499999984700  | 0.13043999673400 | F | F | F |
| 0.6249999998400  | 0.41666999457100 | 0.13043999673400 | F | F | F |
| 0.37500000000500 | 0.08332999798400 | 0.13043999673400 | F | F | F |
| 0.37500000000500 | 0.7499999984700  | 0.13043999673400 | F | F | F |
| 0.37500000000500 | 0.41666999457100 | 0.13043999673400 | F | F | F |
| 0.87500000009600 | 0.08332999798400 | 0.13043999673400 | F | F | F |
| 0.87500000009600 | 0.7499999984700  | 0.13043999673400 | F | F | F |
| 0.87500000009600 | 0.41666999457100 | 0.13043999673400 | F | F | F |
| 0.00161218440586 | 0.24748307513800 | 0.19409175289000 | T | T | T |
| 0.99879339898300 | 0.91493490985100 | 0.19442677249800 | T | T | T |
| 0.99967232554400 | 0.58198902970800 | 0.19455239042200 | T | T | T |
| 0.50099267813900 | 0.25123906086900 | 0.19538758055300 | T | T | T |
| 0.50013922318800 | 0.91384070032700 | 0.19471752839200 | T | T | T |
| 0.49863459900600 | 0.58241500316000 | 0.19450769311800 | T | T | T |
| 0.25184661002200 | 0.24998874639900 | 0.19498001057200 | T | T | T |
| 0.25049522168900 | 0.91435148436500 | 0.19427798466000 | T | T | T |
| 0.24985804080700 | 0.58120726712100 | 0.19451336574700 | T | T | T |
| 0.75065817739700 | 0.24736650781000 | 0.19396157142400 | T | T | T |
| 0.74913547588200 | 0.91346358608300 | 0.19466110488300 | T | T | T |
| 0.75093925635800 | 0.58221798360400 | 0.19403338055200 | T | T | T |

|                  |                  |                  |   |   |   |
|------------------|------------------|------------------|---|---|---|
| 0.37565212869800 | 0.09245935432130 | 0.26493937392900 | T | T | T |
| 0.37216985450600 | 0.75588916551100 | 0.26381249323400 | T | T | T |
| 0.37464562806100 | 0.42714145135200 | 0.26617971292900 | T | T | T |
| 0.87582273012300 | 0.09187285202800 | 0.26491296405600 | T | T | T |
| 0.87261431913100 | 0.75824199010600 | 0.26601787855100 | T | T | T |
| 0.88040946534900 | 0.42637362686500 | 0.26620242583900 | T | T | T |
| 0.12612136701200 | 0.09249731373210 | 0.26514929766900 | T | T | T |
| 0.12147359338500 | 0.76057238821400 | 0.26518490577400 | T | T | T |
| 0.12457055281400 | 0.42665654952900 | 0.26538868589400 | T | T | T |
| 0.62554247700600 | 0.09225271096810 | 0.26512463192400 | T | T | T |
| 0.62216160277700 | 0.75343662544100 | 0.26652270395500 | T | T | T |
| 0.62664892168600 | 0.41287829791500 | 0.25667710540400 | T | T | T |
| 0.56555502295400 | 0.67381031490300 | 0.38487435012200 | T | T | T |
| 0.68102905294300 | 0.71297684667400 | 0.34952680120600 | T | T | T |
| 0.48524072025500 | 0.72628677834900 | 0.37282615712700 | T | T | T |
| 0.49256016439800 | 0.62581839597500 | 0.33981161657000 | T | T | T |
| 0.52722749138700 | 0.82415790811800 | 0.33214391683200 | T | T | T |
| 0.42884173009600 | 0.81545320948300 | 0.32933583471000 | T | T | T |
| 0.70066749174000 | 0.73624212815600 | 0.39820121232900 | T | T | T |
| 0.44422795294400 | 0.55620780278900 | 0.30613368394700 | T | T | T |
| 0.64532274060800 | 0.49288096849200 | 0.36489024678600 | T | T | T |
| 0.56575858511400 | 0.67523469105400 | 0.88152575031500 | T | T | T |
| 0.67759731893600 | 0.71536099461000 | 0.91759849618400 | T | T | T |
| 0.48581718673800 | 0.72811370810100 | 0.89386995604300 | T | T | T |
| 0.49217914254300 | 0.62553792732600 | 0.92473145845600 | T | T | T |
| 0.52859182302100 | 0.82367290048100 | 0.93429169957000 | T | T | T |
| 0.42993692721000 | 0.81608073682300 | 0.93624920814900 | T | T | T |
| 0.70088777384400 | 0.73664284632600 | 0.86905760629800 | T | T | T |
| 0.44396881373000 | 0.55488042190600 | 0.95839953443200 | T | T | T |
| 0.64729875264700 | 0.49686410158500 | 0.89769404642700 | T | T | T |



|                  |                  |                  |   |   |   |
|------------------|------------------|------------------|---|---|---|
| 0.67539171023800 | 0.69369082658600 | 0.38005250222100 | T | T | T |
| 0.50258979389300 | 0.66887443973900 | 0.37949257943300 | T | T | T |
| 0.47607668161600 | 0.82129209706700 | 0.35105572270200 | T | T | T |
| 0.49082419945300 | 0.59650199409900 | 0.30771504384800 | T | T | T |
| 0.67510899780000 | 0.69441173294300 | 0.88722256655100 | T | T | T |
| 0.50262248014100 | 0.67061127434500 | 0.88661551420100 | T | T | T |
| 0.47793688896200 | 0.82232236424400 | 0.91489783177000 | T | T | T |
| 0.49099895058900 | 0.59479809007600 | 0.95663023660900 | T | T | T |
| 0.69407888508800 | 0.54663151986600 | 0.30015017404100 | T | T | T |
| 0.69511090677400 | 0.54740293024800 | 0.96327400271600 | T | T | T |
| 0.62801496005400 | 0.45291470997700 | 0.34239554936700 | T | T | T |
| 0.62931385486000 | 0.45594726608200 | 0.91951763157600 | T | T | T |
| 0.65465979707300 | 0.48290346599800 | 0.30323152968300 | T | T | T |
| 0.65531129021300 | 0.48405617456600 | 0.95915244187500 | T | T | T |

### 3) Large supercell IS

POSCAR

1

|                   |                   |                   |
|-------------------|-------------------|-------------------|
| 46.81727999995965 | 0.00000000000000  | 0.00000000000000  |
| 0.00000000000000  | 49.65722999997834 | 0.00000000000000  |
| 0.00000000000000  | 0.00000000000000  | 30.38812199999634 |

Ga P H O C

540 540 162 108 18

Direct

|                  |                  |                  |   |   |   |
|------------------|------------------|------------------|---|---|---|
| 0.00063578300130 | 0.00747895373233 | 0.01594161579310 | T | T | T |
| 0.00063578300130 | 0.34081228706567 | 0.01594161579310 | T | T | T |
| 0.00063578300130 | 0.67414562039900 | 0.01594161579310 | T | T | T |
| 0.33396911633464 | 0.00747895373233 | 0.01594161579310 | T | T | T |
| 0.33396911633464 | 0.34081228706567 | 0.01594161579310 | T | T | T |
| 0.33396911633464 | 0.67414562039900 | 0.01594161579310 | T | T | T |

|                  |                  |                  |   |   |   |
|------------------|------------------|------------------|---|---|---|
| 0.66730244966797 | 0.00747895373233 | 0.01594161579310 | T | T | T |
| 0.66730244966797 | 0.34081228706567 | 0.01594161579310 | T | T | T |
| 0.66730244966797 | 0.67414562039900 | 0.01594161579310 | T | T | T |
| 0.33248129441067 | 0.22999274083433 | 0.01585321179090 | T | T | T |
| 0.33248129441067 | 0.56332607416767 | 0.01585321179090 | T | T | T |
| 0.33248129441067 | 0.89665940750100 | 0.01585321179090 | T | T | T |
| 0.66581462774400 | 0.22999274083433 | 0.01585321179090 | T | T | T |
| 0.66581462774400 | 0.56332607416767 | 0.01585321179090 | T | T | T |
| 0.66581462774400 | 0.89665940750100 | 0.01585321179090 | T | T | T |
| 0.99914796107733 | 0.22999274083433 | 0.01585321179090 | T | T | T |
| 0.99914796107733 | 0.56332607416767 | 0.01585321179090 | T | T | T |
| 0.99914796107733 | 0.89665940750100 | 0.01585321179090 | T | T | T |
| 0.33247045451033 | 0.11817089856600 | 0.01579589699140 | T | T | T |
| 0.33247045451033 | 0.45150423189933 | 0.01579589699140 | T | T | T |
| 0.33247045451033 | 0.78483756523267 | 0.01579589699140 | T | T | T |
| 0.66580378784367 | 0.11817089856600 | 0.01579589699140 | T | T | T |
| 0.66580378784367 | 0.45150423189933 | 0.01579589699140 | T | T | T |
| 0.66580378784367 | 0.78483756523267 | 0.01579589699140 | T | T | T |
| 0.99913712117700 | 0.11817089856600 | 0.01579589699140 | T | T | T |
| 0.99913712117700 | 0.45150423189933 | 0.01579589699140 | T | T | T |
| 0.99913712117700 | 0.78483756523267 | 0.01579589699140 | T | T | T |
| 0.16731409532633 | 0.00900088999273 | 0.01586548293550 | T | T | T |
| 0.16731409532633 | 0.34233422332607 | 0.01586548293550 | T | T | T |
| 0.16731409532633 | 0.67566755665940 | 0.01586548293550 | T | T | T |
| 0.50064742865967 | 0.00900088999273 | 0.01586548293550 | T | T | T |
| 0.50064742865967 | 0.34233422332607 | 0.01586548293550 | T | T | T |
| 0.50064742865967 | 0.67566755665940 | 0.01586548293550 | T | T | T |
| 0.83398076199300 | 0.00900088999273 | 0.01586548293550 | T | T | T |
| 0.83398076199300 | 0.34233422332607 | 0.01586548293550 | T | T | T |
| 0.83398076199300 | 0.67566755665940 | 0.01586548293550 | T | T | T |

|                  |                  |                  |   |   |   |
|------------------|------------------|------------------|---|---|---|
| 0.16563132778933 | 0.22593673664467 | 0.01537363889750 | T | T | T |
| 0.16563132778933 | 0.55927006997800 | 0.01537363889750 | T | T | T |
| 0.16563132778933 | 0.89260340331133 | 0.01537363889750 | T | T | T |
| 0.49896466112267 | 0.22593673664467 | 0.01537363889750 | T | T | T |
| 0.49896466112267 | 0.55927006997800 | 0.01537363889750 | T | T | T |
| 0.49896466112267 | 0.89260340331133 | 0.01537363889750 | T | T | T |
| 0.83229799445600 | 0.22593673664467 | 0.01537363889750 | T | T | T |
| 0.83229799445600 | 0.55927006997800 | 0.01537363889750 | T | T | T |
| 0.83229799445600 | 0.89260340331133 | 0.01537363889750 | T | T | T |
| 0.16561956630533 | 0.11790613814067 | 0.01613033428700 | T | T | T |
| 0.16561956630533 | 0.45123947147400 | 0.01613033428700 | T | T | T |
| 0.16561956630533 | 0.78457280480733 | 0.01613033428700 | T | T | T |
| 0.49895289963867 | 0.11790613814067 | 0.01613033428700 | T | T | T |
| 0.49895289963867 | 0.45123947147400 | 0.01613033428700 | T | T | T |
| 0.49895289963867 | 0.78457280480733 | 0.01613033428700 | T | T | T |
| 0.83228623297200 | 0.11790613814067 | 0.01613033428700 | T | T | T |
| 0.83228623297200 | 0.45123947147400 | 0.01613033428700 | T | T | T |
| 0.83228623297200 | 0.78457280480733 | 0.01613033428700 | T | T | T |
| 0.08346326627500 | 0.00748958170427 | 0.01596861036590 | T | T | T |
| 0.08346326627500 | 0.34082291503760 | 0.01596861036590 | T | T | T |
| 0.08346326627500 | 0.67415624837093 | 0.01596861036590 | T | T | T |
| 0.41679659960833 | 0.00748958170427 | 0.01596861036590 | T | T | T |
| 0.41679659960833 | 0.34082291503760 | 0.01596861036590 | T | T | T |
| 0.41679659960833 | 0.67415624837093 | 0.01596861036590 | T | T | T |
| 0.75012993294167 | 0.00748958170427 | 0.01596861036590 | T | T | T |
| 0.75012993294167 | 0.34082291503760 | 0.01596861036590 | T | T | T |
| 0.75012993294167 | 0.67415624837093 | 0.01596861036590 | T | T | T |
| 0.08139018139533 | 0.22989299063767 | 0.01592186757690 | T | T | T |
| 0.08139018139533 | 0.56322632397100 | 0.01592186757690 | T | T | T |
| 0.08139018139533 | 0.89655965730433 | 0.01592186757690 | T | T | T |

|                  |                  |                  |   |   |   |
|------------------|------------------|------------------|---|---|---|
| 0.41472351472867 | 0.22989299063767 | 0.01592186757690 | T | T | T |
| 0.41472351472867 | 0.56322632397100 | 0.01592186757690 | T | T | T |
| 0.41472351472867 | 0.89655965730433 | 0.01592186757690 | T | T | T |
| 0.74805684806200 | 0.22989299063767 | 0.01592186757690 | T | T | T |
| 0.74805684806200 | 0.56322632397100 | 0.01592186757690 | T | T | T |
| 0.74805684806200 | 0.89655965730433 | 0.01592186757690 | T | T | T |
| 0.08156893817033 | 0.11812381255300 | 0.01579356803470 | T | T | T |
| 0.08156893817033 | 0.45145714588633 | 0.01579356803470 | T | T | T |
| 0.08156893817033 | 0.78479047921967 | 0.01579356803470 | T | T | T |
| 0.41490227150367 | 0.11812381255300 | 0.01579356803470 | T | T | T |
| 0.41490227150367 | 0.45145714588633 | 0.01579356803470 | T | T | T |
| 0.41490227150367 | 0.78479047921967 | 0.01579356803470 | T | T | T |
| 0.74823560483700 | 0.11812381255300 | 0.01579356803470 | T | T | T |
| 0.74823560483700 | 0.45145714588633 | 0.01579356803470 | T | T | T |
| 0.74823560483700 | 0.78479047921967 | 0.01579356803470 | T | T | T |
| 0.25027782916833 | 0.00761374708070 | 0.01599514709160 | T | T | T |
| 0.25027782916833 | 0.34094708041403 | 0.01599514709160 | T | T | T |
| 0.25027782916833 | 0.67428041374737 | 0.01599514709160 | T | T | T |
| 0.58361116250167 | 0.00761374708070 | 0.01599514709160 | T | T | T |
| 0.58361116250167 | 0.34094708041403 | 0.01599514709160 | T | T | T |
| 0.58361116250167 | 0.67428041374737 | 0.01599514709160 | T | T | T |
| 0.91694449583500 | 0.00761374708070 | 0.01599514709160 | T | T | T |
| 0.91694449583500 | 0.34094708041403 | 0.01599514709160 | T | T | T |
| 0.91694449583500 | 0.67428041374737 | 0.01599514709160 | T | T | T |
| 0.25025827179533 | 0.22978698958967 | 0.01899441921010 | T | T | T |
| 0.25025827179533 | 0.56312032292300 | 0.01899441921010 | T | T | T |
| 0.25025827179533 | 0.89645365625633 | 0.01899441921010 | T | T | T |
| 0.58359160512867 | 0.22978698958967 | 0.01899441921010 | T | T | T |
| 0.58359160512867 | 0.56312032292300 | 0.01899441921010 | T | T | T |
| 0.58359160512867 | 0.89645365625633 | 0.01899441921010 | T | T | T |

|                  |                  |                  |   |   |   |
|------------------|------------------|------------------|---|---|---|
| 0.91692493846200 | 0.22978698958967 | 0.01899441921010 | T | T | T |
| 0.91692493846200 | 0.56312032292300 | 0.01899441921010 | T | T | T |
| 0.91692493846200 | 0.89645365625633 | 0.01899441921010 | T | T | T |
| 0.25008378676333 | 0.11933498922767 | 0.01590777354750 | T | T | T |
| 0.25008378676333 | 0.45266832256100 | 0.01590777354750 | T | T | T |
| 0.25008378676333 | 0.78600165589433 | 0.01590777354750 | T | T | T |
| 0.58341712009667 | 0.11933498922767 | 0.01590777354750 | T | T | T |
| 0.58341712009667 | 0.45266832256100 | 0.01590777354750 | T | T | T |
| 0.58341712009667 | 0.78600165589433 | 0.01590777354750 | T | T | T |
| 0.91675045343000 | 0.11933498922767 | 0.01590777354750 | T | T | T |
| 0.91675045343000 | 0.45266832256100 | 0.01590777354750 | T | T | T |
| 0.91675045343000 | 0.78600165589433 | 0.01590777354750 | T | T | T |
| 0.12510682116600 | 0.05441569367933 | 0.06408722517850 | T | T | T |
| 0.12510682116600 | 0.38774902701267 | 0.06408722517850 | T | T | T |
| 0.12510682116600 | 0.72108236034600 | 0.06408722517850 | T | T | T |
| 0.45844015449933 | 0.05441569367933 | 0.06408722517850 | T | T | T |
| 0.45844015449933 | 0.38774902701267 | 0.06408722517850 | T | T | T |
| 0.45844015449933 | 0.72108236034600 | 0.06408722517850 | T | T | T |
| 0.79177348783267 | 0.05441569367933 | 0.06408722517850 | T | T | T |
| 0.79177348783267 | 0.38774902701267 | 0.06408722517850 | T | T | T |
| 0.79177348783267 | 0.72108236034600 | 0.06408722517850 | T | T | T |
| 0.12530221476567 | 0.27747104694933 | 0.06443884714310 | T | T | T |
| 0.12530221476567 | 0.61080438028267 | 0.06443884714310 | T | T | T |
| 0.12530221476567 | 0.94413771361600 | 0.06443884714310 | T | T | T |
| 0.45863554809900 | 0.27747104694933 | 0.06443884714310 | T | T | T |
| 0.45863554809900 | 0.61080438028267 | 0.06443884714310 | T | T | T |
| 0.45863554809900 | 0.94413771361600 | 0.06443884714310 | T | T | T |
| 0.79196888143233 | 0.27747104694933 | 0.06443884714310 | T | T | T |
| 0.79196888143233 | 0.61080438028267 | 0.06443884714310 | T | T | T |
| 0.79196888143233 | 0.94413771361600 | 0.06443884714310 | T | T | T |

|                  |                  |                  |   |   |   |
|------------------|------------------|------------------|---|---|---|
| 0.12381561730300 | 0.16548073787833 | 0.06449094231160 | T | T | T |
| 0.12381561730300 | 0.49881407121167 | 0.06449094231160 | T | T | T |
| 0.12381561730300 | 0.83214740454500 | 0.06449094231160 | T | T | T |
| 0.45714895063633 | 0.16548073787833 | 0.06449094231160 | T | T | T |
| 0.45714895063633 | 0.49881407121167 | 0.06449094231160 | T | T | T |
| 0.45714895063633 | 0.83214740454500 | 0.06449094231160 | T | T | T |
| 0.79048228396967 | 0.16548073787833 | 0.06449094231160 | T | T | T |
| 0.79048228396967 | 0.49881407121167 | 0.06449094231160 | T | T | T |
| 0.79048228396967 | 0.83214740454500 | 0.06449094231160 | T | T | T |
| 0.29179006452800 | 0.05463319093600 | 0.06404424584110 | T | T | T |
| 0.29179006452800 | 0.38796652426933 | 0.06404424584110 | T | T | T |
| 0.29179006452800 | 0.72129985760267 | 0.06404424584110 | T | T | T |
| 0.62512339786133 | 0.05463319093600 | 0.06404424584110 | T | T | T |
| 0.62512339786133 | 0.38796652426933 | 0.06404424584110 | T | T | T |
| 0.62512339786133 | 0.72129985760267 | 0.06404424584110 | T | T | T |
| 0.95845673119467 | 0.05463319093600 | 0.06404424584110 | T | T | T |
| 0.95845673119467 | 0.38796652426933 | 0.06404424584110 | T | T | T |
| 0.95845673119467 | 0.72129985760267 | 0.06404424584110 | T | T | T |
| 0.29195427996567 | 0.27668443401633 | 0.06424775993310 | T | T | T |
| 0.29195427996567 | 0.61001776734967 | 0.06424775993310 | T | T | T |
| 0.29195427996567 | 0.94335110068300 | 0.06424775993310 | T | T | T |
| 0.62528761329900 | 0.27668443401633 | 0.06424775993310 | T | T | T |
| 0.62528761329900 | 0.61001776734967 | 0.06424775993310 | T | T | T |
| 0.62528761329900 | 0.94335110068300 | 0.06424775993310 | T | T | T |
| 0.95862094663233 | 0.27668443401633 | 0.06424775993310 | T | T | T |
| 0.95862094663233 | 0.61001776734967 | 0.06424775993310 | T | T | T |
| 0.95862094663233 | 0.94335110068300 | 0.06424775993310 | T | T | T |
| 0.29197207191533 | 0.16553814032300 | 0.06420753187000 | T | T | T |
| 0.29197207191533 | 0.49887147365633 | 0.06420753187000 | T | T | T |
| 0.29197207191533 | 0.83220480698967 | 0.06420753187000 | T | T | T |

|                  |                  |                  |   |   |   |
|------------------|------------------|------------------|---|---|---|
| 0.62530540524867 | 0.16553814032300 | 0.06420753187000 | T | T | T |
| 0.62530540524867 | 0.49887147365633 | 0.06420753187000 | T | T | T |
| 0.62530540524867 | 0.83220480698967 | 0.06420753187000 | T | T | T |
| 0.95863873858200 | 0.16553814032300 | 0.06420753187000 | T | T | T |
| 0.95863873858200 | 0.49887147365633 | 0.06420753187000 | T | T | T |
| 0.95863873858200 | 0.83220480698967 | 0.06420753187000 | T | T | T |
| 0.04143313125600 | 0.05461060846033 | 0.06411493070820 | T | T | T |
| 0.04143313125600 | 0.38794394179367 | 0.06411493070820 | T | T | T |
| 0.04143313125600 | 0.72127727512700 | 0.06411493070820 | T | T | T |
| 0.37476646458933 | 0.05461060846033 | 0.06411493070820 | T | T | T |
| 0.37476646458933 | 0.38794394179367 | 0.06411493070820 | T | T | T |
| 0.37476646458933 | 0.72127727512700 | 0.06411493070820 | T | T | T |
| 0.70809979792267 | 0.05461060846033 | 0.06411493070820 | T | T | T |
| 0.70809979792267 | 0.38794394179367 | 0.06411493070820 | T | T | T |
| 0.70809979792267 | 0.72127727512700 | 0.06411493070820 | T | T | T |
| 0.04138761135667 | 0.27646584895333 | 0.06420019444410 | T | T | T |
| 0.04138761135667 | 0.60979918228667 | 0.06420019444410 | T | T | T |
| 0.04138761135667 | 0.94313251562000 | 0.06420019444410 | T | T | T |
| 0.37472094469000 | 0.27646584895333 | 0.06420019444410 | T | T | T |
| 0.37472094469000 | 0.60979918228667 | 0.06420019444410 | T | T | T |
| 0.37472094469000 | 0.94313251562000 | 0.06420019444410 | T | T | T |
| 0.70805427802333 | 0.27646584895333 | 0.06420019444410 | T | T | T |
| 0.70805427802333 | 0.60979918228667 | 0.06420019444410 | T | T | T |
| 0.70805427802333 | 0.94313251562000 | 0.06420019444410 | T | T | T |
| 0.04114248105100 | 0.16553147909967 | 0.06412271010620 | T | T | T |
| 0.04114248105100 | 0.49886481243300 | 0.06412271010620 | T | T | T |
| 0.04114248105100 | 0.83219814576633 | 0.06412271010620 | T | T | T |
| 0.37447581438433 | 0.16553147909967 | 0.06412271010620 | T | T | T |
| 0.37447581438433 | 0.49886481243300 | 0.06412271010620 | T | T | T |
| 0.37447581438433 | 0.83219814576633 | 0.06412271010620 | T | T | T |

|                  |                  |                  |   |   |   |
|------------------|------------------|------------------|---|---|---|
| 0.70780914771767 | 0.16553147909967 | 0.06412271010620 | T | T | T |
| 0.70780914771767 | 0.49886481243300 | 0.06412271010620 | T | T | T |
| 0.70780914771767 | 0.83219814576633 | 0.06412271010620 | T | T | T |
| 0.20830744957900 | 0.05484809181400 | 0.06415474581680 | T | T | T |
| 0.20830744957900 | 0.38818142514733 | 0.06415474581680 | T | T | T |
| 0.20830744957900 | 0.72151475848067 | 0.06415474581680 | T | T | T |
| 0.54164078291233 | 0.05484809181400 | 0.06415474581680 | T | T | T |
| 0.54164078291233 | 0.38818142514733 | 0.06415474581680 | T | T | T |
| 0.54164078291233 | 0.72151475848067 | 0.06415474581680 | T | T | T |
| 0.87497411624567 | 0.05484809181400 | 0.06415474581680 | T | T | T |
| 0.87497411624567 | 0.38818142514733 | 0.06415474581680 | T | T | T |
| 0.87497411624567 | 0.72151475848067 | 0.06415474581680 | T | T | T |
| 0.20801865143300 | 0.27785822705867 | 0.06477923125430 | T | T | T |
| 0.20801865143300 | 0.61119156039200 | 0.06477923125430 | T | T | T |
| 0.20801865143300 | 0.94452489372533 | 0.06477923125430 | T | T | T |
| 0.54135198476633 | 0.27785822705867 | 0.06477923125430 | T | T | T |
| 0.54135198476633 | 0.61119156039200 | 0.06477923125430 | T | T | T |
| 0.54135198476633 | 0.94452489372533 | 0.06477923125430 | T | T | T |
| 0.87468531809967 | 0.27785822705867 | 0.06477923125430 | T | T | T |
| 0.87468531809967 | 0.61119156039200 | 0.06477923125430 | T | T | T |
| 0.87468531809967 | 0.94452489372533 | 0.06477923125430 | T | T | T |
| 0.20786682017533 | 0.16558075110733 | 0.06476629566690 | T | T | T |
| 0.20786682017533 | 0.49891408444067 | 0.06476629566690 | T | T | T |
| 0.20786682017533 | 0.83224741777400 | 0.06476629566690 | T | T | T |
| 0.54120015350867 | 0.16558075110733 | 0.06476629566690 | T | T | T |
| 0.54120015350867 | 0.49891408444067 | 0.06476629566690 | T | T | T |
| 0.54120015350867 | 0.83224741777400 | 0.06476629566690 | T | T | T |
| 0.87453348684200 | 0.16558075110733 | 0.06476629566690 | T | T | T |
| 0.87453348684200 | 0.49891408444067 | 0.06476629566690 | T | T | T |
| 0.87453348684200 | 0.83224741777400 | 0.06476629566690 | T | T | T |



|                   |                   |                  |   |   |   |
|-------------------|-------------------|------------------|---|---|---|
| 0.000000000000000 | 0.000000000000000 | 0.13043999673400 | F | F | F |
| 0.000000000000000 | 0.333333333333333 | 0.13043999673400 | F | F | F |
| 0.000000000000000 | 0.666666666666667 | 0.13043999673400 | F | F | F |
| 0.333333333333333 | 0.000000000000000 | 0.13043999673400 | F | F | F |
| 0.333333333333333 | 0.333333333333333 | 0.13043999673400 | F | F | F |
| 0.333333333333333 | 0.666666666666667 | 0.13043999673400 | F | F | F |
| 0.666666666666667 | 0.000000000000000 | 0.13043999673400 | F | F | F |
| 0.666666666666667 | 0.333333333333333 | 0.13043999673400 | F | F | F |
| 0.666666666666667 | 0.666666666666667 | 0.13043999673400 | F | F | F |
| 0.000000000000000 | 0.22222334138000  | 0.13043999673400 | F | F | F |
| 0.000000000000000 | 0.55555667471333  | 0.13043999673400 | F | F | F |
| 0.000000000000000 | 0.88889000804667  | 0.13043999673400 | F | F | F |
| 0.333333333333333 | 0.22222334138000  | 0.13043999673400 | F | F | F |
| 0.333333333333333 | 0.55555667471333  | 0.13043999673400 | F | F | F |
| 0.333333333333333 | 0.88889000804667  | 0.13043999673400 | F | F | F |
| 0.666666666666667 | 0.22222334138000  | 0.13043999673400 | F | F | F |
| 0.666666666666667 | 0.55555667471333  | 0.13043999673400 | F | F | F |
| 0.666666666666667 | 0.88889000804667  | 0.13043999673400 | F | F | F |
| 0.000000000000000 | 0.11111000180000  | 0.13043999673400 | F | F | F |
| 0.000000000000000 | 0.44444333513333  | 0.13043999673400 | F | F | F |
| 0.000000000000000 | 0.77777666846667  | 0.13043999673400 | F | F | F |
| 0.333333333333333 | 0.11111000180000  | 0.13043999673400 | F | F | F |
| 0.333333333333333 | 0.44444333513333  | 0.13043999673400 | F | F | F |
| 0.333333333333333 | 0.77777666846667  | 0.13043999673400 | F | F | F |
| 0.666666666666667 | 0.11111000180000  | 0.13043999673400 | F | F | F |
| 0.666666666666667 | 0.44444333513333  | 0.13043999673400 | F | F | F |
| 0.666666666666667 | 0.77777666846667  | 0.13043999673400 | F | F | F |
| 0.16666666667500  | 0.000000000000000 | 0.13043999673400 | F | F | F |
| 0.16666666667500  | 0.333333333333333 | 0.13043999673400 | F | F | F |
| 0.16666666667500  | 0.666666666666667 | 0.13043999673400 | F | F | F |

|                  |                  |                  |   |   |   |
|------------------|------------------|------------------|---|---|---|
| 0.50000000000833 | 0.00000000000000 | 0.13043999673400 | F | F | F |
| 0.50000000000833 | 0.33333333333333 | 0.13043999673400 | F | F | F |
| 0.50000000000833 | 0.66666666666667 | 0.13043999673400 | F | F | F |
| 0.83333333334167 | 0.00000000000000 | 0.13043999673400 | F | F | F |
| 0.83333333334167 | 0.33333333333333 | 0.13043999673400 | F | F | F |
| 0.83333333334167 | 0.66666666666667 | 0.13043999673400 | F | F | F |
| 0.16666666667500 | 0.22222334138000 | 0.13043999673400 | F | F | F |
| 0.16666666667500 | 0.55555667471333 | 0.13043999673400 | F | F | F |
| 0.16666666667500 | 0.88889000804667 | 0.13043999673400 | F | F | F |
| 0.50000000000833 | 0.22222334138000 | 0.13043999673400 | F | F | F |
| 0.50000000000833 | 0.55555667471333 | 0.13043999673400 | F | F | F |
| 0.50000000000833 | 0.88889000804667 | 0.13043999673400 | F | F | F |
| 0.83333333334167 | 0.22222334138000 | 0.13043999673400 | F | F | F |
| 0.83333333334167 | 0.55555667471333 | 0.13043999673400 | F | F | F |
| 0.83333333334167 | 0.88889000804667 | 0.13043999673400 | F | F | F |
| 0.16666666667500 | 0.11111000180000 | 0.13043999673400 | F | F | F |
| 0.16666666667500 | 0.44444333513333 | 0.13043999673400 | F | F | F |
| 0.16666666667500 | 0.77777666846667 | 0.13043999673400 | F | F | F |
| 0.50000000000833 | 0.11111000180000 | 0.13043999673400 | F | F | F |
| 0.50000000000833 | 0.44444333513333 | 0.13043999673400 | F | F | F |
| 0.50000000000833 | 0.77777666846667 | 0.13043999673400 | F | F | F |
| 0.83333333334167 | 0.11111000180000 | 0.13043999673400 | F | F | F |
| 0.83333333334167 | 0.44444333513333 | 0.13043999673400 | F | F | F |
| 0.83333333334167 | 0.77777666846667 | 0.13043999673400 | F | F | F |
| 0.08333333332667 | 0.00000000000000 | 0.13043999673400 | F | F | F |
| 0.08333333332667 | 0.33333333333333 | 0.13043999673400 | F | F | F |
| 0.08333333332667 | 0.66666666666667 | 0.13043999673400 | F | F | F |
| 0.41666666666000 | 0.00000000000000 | 0.13043999673400 | F | F | F |
| 0.41666666666000 | 0.33333333333333 | 0.13043999673400 | F | F | F |
| 0.41666666666000 | 0.66666666666667 | 0.13043999673400 | F | F | F |

|                 |                  |                  |   |   |   |
|-----------------|------------------|------------------|---|---|---|
| 0.7499999999333 | 0.0000000000000  | 0.13043999673400 | F | F | F |
| 0.7499999999333 | 0.3333333333333  | 0.13043999673400 | F | F | F |
| 0.7499999999333 | 0.6666666666667  | 0.13043999673400 | F | F | F |
| 0.0833333332667 | 0.22222334138000 | 0.13043999673400 | F | F | F |
| 0.0833333332667 | 0.55555667471333 | 0.13043999673400 | F | F | F |
| 0.0833333332667 | 0.88889000804667 | 0.13043999673400 | F | F | F |
| 0.4166666666000 | 0.22222334138000 | 0.13043999673400 | F | F | F |
| 0.4166666666000 | 0.55555667471333 | 0.13043999673400 | F | F | F |
| 0.4166666666000 | 0.88889000804667 | 0.13043999673400 | F | F | F |
| 0.7499999999333 | 0.22222334138000 | 0.13043999673400 | F | F | F |
| 0.7499999999333 | 0.55555667471333 | 0.13043999673400 | F | F | F |
| 0.7499999999333 | 0.88889000804667 | 0.13043999673400 | F | F | F |
| 0.0833333332667 | 0.11111000180000 | 0.13043999673400 | F | F | F |
| 0.0833333332667 | 0.44444333513333 | 0.13043999673400 | F | F | F |
| 0.0833333332667 | 0.77777666846667 | 0.13043999673400 | F | F | F |
| 0.4166666666000 | 0.11111000180000 | 0.13043999673400 | F | F | F |
| 0.4166666666000 | 0.44444333513333 | 0.13043999673400 | F | F | F |
| 0.4166666666000 | 0.77777666846667 | 0.13043999673400 | F | F | F |
| 0.7499999999333 | 0.11111000180000 | 0.13043999673400 | F | F | F |
| 0.7499999999333 | 0.44444333513333 | 0.13043999673400 | F | F | F |
| 0.7499999999333 | 0.77777666846667 | 0.13043999673400 | F | F | F |
| 0.2500000008867 | 0.0000000000000  | 0.13043999673400 | F | F | F |
| 0.2500000008867 | 0.3333333333333  | 0.13043999673400 | F | F | F |
| 0.2500000008867 | 0.6666666666667  | 0.13043999673400 | F | F | F |
| 0.5833333342200 | 0.0000000000000  | 0.13043999673400 | F | F | F |
| 0.5833333342200 | 0.3333333333333  | 0.13043999673400 | F | F | F |
| 0.5833333342200 | 0.6666666666667  | 0.13043999673400 | F | F | F |
| 0.9166666675533 | 0.0000000000000  | 0.13043999673400 | F | F | F |
| 0.9166666675533 | 0.3333333333333  | 0.13043999673400 | F | F | F |
| 0.9166666675533 | 0.6666666666667  | 0.13043999673400 | F | F | F |

|                  |                  |                  |   |   |   |
|------------------|------------------|------------------|---|---|---|
| 0.25000000008867 | 0.22222334138000 | 0.13043999673400 | F | F | F |
| 0.25000000008867 | 0.55555667471333 | 0.13043999673400 | F | F | F |
| 0.25000000008867 | 0.88889000804667 | 0.13043999673400 | F | F | F |
| 0.58333333342200 | 0.22222334138000 | 0.13043999673400 | F | F | F |
| 0.58333333342200 | 0.55555667471333 | 0.13043999673400 | F | F | F |
| 0.58333333342200 | 0.88889000804667 | 0.13043999673400 | F | F | F |
| 0.91666666675533 | 0.22222334138000 | 0.13043999673400 | F | F | F |
| 0.91666666675533 | 0.55555667471333 | 0.13043999673400 | F | F | F |
| 0.91666666675533 | 0.88889000804667 | 0.13043999673400 | F | F | F |
| 0.25000000008867 | 0.11111000180000 | 0.13043999673400 | F | F | F |
| 0.25000000008867 | 0.44444333513333 | 0.13043999673400 | F | F | F |
| 0.25000000008867 | 0.77777666846667 | 0.13043999673400 | F | F | F |
| 0.58333333342200 | 0.11111000180000 | 0.13043999673400 | F | F | F |
| 0.58333333342200 | 0.44444333513333 | 0.13043999673400 | F | F | F |
| 0.58333333342200 | 0.77777666846667 | 0.13043999673400 | F | F | F |
| 0.91666666675533 | 0.11111000180000 | 0.13043999673400 | F | F | F |
| 0.91666666675533 | 0.44444333513333 | 0.13043999673400 | F | F | F |
| 0.91666666675533 | 0.77777666846667 | 0.13043999673400 | F | F | F |
| 0.12524213066900 | 0.05470133973033 | 0.19673444260600 | T | T | T |
| 0.12524213066900 | 0.38803467306367 | 0.19673444260600 | T | T | T |
| 0.12524213066900 | 0.72136800639700 | 0.19673444260600 | T | T | T |
| 0.45857546400233 | 0.05470133973033 | 0.19673444260600 | T | T | T |
| 0.45857546400233 | 0.38803467306367 | 0.19673444260600 | T | T | T |
| 0.45857546400233 | 0.72136800639700 | 0.19673444260600 | T | T | T |
| 0.79190879733567 | 0.05470133973033 | 0.19673444260600 | T | T | T |
| 0.79190879733567 | 0.38803467306367 | 0.19673444260600 | T | T | T |
| 0.79190879733567 | 0.72136800639700 | 0.19673444260600 | T | T | T |
| 0.12525435165700 | 0.27645848598233 | 0.19659646701800 | T | T | T |
| 0.12525435165700 | 0.60979181931567 | 0.19659646701800 | T | T | T |
| 0.12525435165700 | 0.94312515264900 | 0.19659646701800 | T | T | T |

|                  |                  |                  |   |   |   |
|------------------|------------------|------------------|---|---|---|
| 0.45858768499033 | 0.27645848598233 | 0.19659646701800 | T | T | T |
| 0.45858768499033 | 0.60979181931567 | 0.19659646701800 | T | T | T |
| 0.45858768499033 | 0.94312515264900 | 0.19659646701800 | T | T | T |
| 0.79192101832367 | 0.27645848598233 | 0.19659646701800 | T | T | T |
| 0.79192101832367 | 0.60979181931567 | 0.19659646701800 | T | T | T |
| 0.79192101832367 | 0.94312515264900 | 0.19659646701800 | T | T | T |
| 0.12524865819300 | 0.16564061588967 | 0.19623188316500 | T | T | T |
| 0.12524865819300 | 0.49897394922300 | 0.19623188316500 | T | T | T |
| 0.12524865819300 | 0.83230728255633 | 0.19623188316500 | T | T | T |
| 0.45858199152633 | 0.16564061588967 | 0.19623188316500 | T | T | T |
| 0.45858199152633 | 0.49897394922300 | 0.19623188316500 | T | T | T |
| 0.45858199152633 | 0.83230728255633 | 0.19623188316500 | T | T | T |
| 0.79191532485967 | 0.16564061588967 | 0.19623188316500 | T | T | T |
| 0.79191532485967 | 0.49897394922300 | 0.19623188316500 | T | T | T |
| 0.79191532485967 | 0.83230728255633 | 0.19623188316500 | T | T | T |
| 0.29205071769233 | 0.05484264268133 | 0.19673096166900 | T | T | T |
| 0.29205071769233 | 0.38817597601467 | 0.19673096166900 | T | T | T |
| 0.29205071769233 | 0.72150930934800 | 0.19673096166900 | T | T | T |
| 0.62538405102567 | 0.05484264268133 | 0.19673096166900 | T | T | T |
| 0.62538405102567 | 0.38817597601467 | 0.19673096166900 | T | T | T |
| 0.62538405102567 | 0.72150930934800 | 0.19673096166900 | T | T | T |
| 0.95871738435900 | 0.05484264268133 | 0.19673096166900 | T | T | T |
| 0.95871738435900 | 0.38817597601467 | 0.19673096166900 | T | T | T |
| 0.95871738435900 | 0.72150930934800 | 0.19673096166900 | T | T | T |
| 0.29187376880600 | 0.27662363219500 | 0.19657165169600 | T | T | T |
| 0.29187376880600 | 0.60995696552833 | 0.19657165169600 | T | T | T |
| 0.29187376880600 | 0.94329029886167 | 0.19657165169600 | T | T | T |
| 0.62520710213933 | 0.27662363219500 | 0.19657165169600 | T | T | T |
| 0.62520710213933 | 0.60995696552833 | 0.19657165169600 | T | T | T |
| 0.62520710213933 | 0.94329029886167 | 0.19657165169600 | T | T | T |

|                  |                  |                  |   |   |   |
|------------------|------------------|------------------|---|---|---|
| 0.95854043547267 | 0.27662363219500 | 0.19657165169600 | T | T | T |
| 0.95854043547267 | 0.60995696552833 | 0.19657165169600 | T | T | T |
| 0.95854043547267 | 0.94329029886167 | 0.19657165169600 | T | T | T |
| 0.29202230752033 | 0.16569888272033 | 0.19648032714700 | T | T | T |
| 0.29202230752033 | 0.49903221605367 | 0.19648032714700 | T | T | T |
| 0.29202230752033 | 0.83236554938700 | 0.19648032714700 | T | T | T |
| 0.62535564085367 | 0.16569888272033 | 0.19648032714700 | T | T | T |
| 0.62535564085367 | 0.49903221605367 | 0.19648032714700 | T | T | T |
| 0.62535564085367 | 0.83236554938700 | 0.19648032714700 | T | T | T |
| 0.95868897418700 | 0.16569888272033 | 0.19648032714700 | T | T | T |
| 0.95868897418700 | 0.49903221605367 | 0.19648032714700 | T | T | T |
| 0.95868897418700 | 0.83236554938700 | 0.19648032714700 | T | T | T |
| 0.04160202918633 | 0.05490856539467 | 0.19666181709800 | T | T | T |
| 0.04160202918633 | 0.38824189872800 | 0.19666181709800 | T | T | T |
| 0.04160202918633 | 0.72157523206133 | 0.19666181709800 | T | T | T |
| 0.37493536251967 | 0.05490856539467 | 0.19666181709800 | T | T | T |
| 0.37493536251967 | 0.38824189872800 | 0.19666181709800 | T | T | T |
| 0.37493536251967 | 0.72157523206133 | 0.19666181709800 | T | T | T |
| 0.70826869585300 | 0.05490856539467 | 0.19666181709800 | T | T | T |
| 0.70826869585300 | 0.38824189872800 | 0.19666181709800 | T | T | T |
| 0.70826869585300 | 0.72157523206133 | 0.19666181709800 | T | T | T |
| 0.04140273585633 | 0.27653440995067 | 0.19653817571100 | T | T | T |
| 0.04140273585633 | 0.60986774328400 | 0.19653817571100 | T | T | T |
| 0.04140273585633 | 0.94320107661733 | 0.19653817571100 | T | T | T |
| 0.37473606918967 | 0.27653440995067 | 0.19653817571100 | T | T | T |
| 0.37473606918967 | 0.60986774328400 | 0.19653817571100 | T | T | T |
| 0.37473606918967 | 0.94320107661733 | 0.19653817571100 | T | T | T |
| 0.70806940252300 | 0.27653440995067 | 0.19653817571100 | T | T | T |
| 0.70806940252300 | 0.60986774328400 | 0.19653817571100 | T | T | T |
| 0.70806940252300 | 0.94320107661733 | 0.19653817571100 | T | T | T |

|                  |                  |                  |   |   |   |
|------------------|------------------|------------------|---|---|---|
| 0.04143120343300 | 0.16572097789433 | 0.19646274814900 | T | T | T |
| 0.04143120343300 | 0.49905431122767 | 0.19646274814900 | T | T | T |
| 0.04143120343300 | 0.83238764456100 | 0.19646274814900 | T | T | T |
| 0.37476453676633 | 0.16572097789433 | 0.19646274814900 | T | T | T |
| 0.37476453676633 | 0.49905431122767 | 0.19646274814900 | T | T | T |
| 0.37476453676633 | 0.83238764456100 | 0.19646274814900 | T | T | T |
| 0.70809787009967 | 0.16572097789433 | 0.19646274814900 | T | T | T |
| 0.70809787009967 | 0.49905431122767 | 0.19646274814900 | T | T | T |
| 0.70809787009967 | 0.83238764456100 | 0.19646274814900 | T | T | T |
| 0.20866408857933 | 0.05474576607533 | 0.19666457868900 | T | T | T |
| 0.20866408857933 | 0.38807909940867 | 0.19666457868900 | T | T | T |
| 0.20866408857933 | 0.72141243274200 | 0.19666457868900 | T | T | T |
| 0.54199742191267 | 0.05474576607533 | 0.19666457868900 | T | T | T |
| 0.54199742191267 | 0.38807909940867 | 0.19666457868900 | T | T | T |
| 0.54199742191267 | 0.72141243274200 | 0.19666457868900 | T | T | T |
| 0.87533075524600 | 0.05474576607533 | 0.19666457868900 | T | T | T |
| 0.87533075524600 | 0.38807909940867 | 0.19666457868900 | T | T | T |
| 0.87533075524600 | 0.72141243274200 | 0.19666457868900 | T | T | T |
| 0.20806780722600 | 0.27665266734133 | 0.19652463976800 | T | T | T |
| 0.20806780722600 | 0.60998600067467 | 0.19652463976800 | T | T | T |
| 0.20806780722600 | 0.94331933400800 | 0.19652463976800 | T | T | T |
| 0.54140114055933 | 0.27665266734133 | 0.19652463976800 | T | T | T |
| 0.54140114055933 | 0.60998600067467 | 0.19652463976800 | T | T | T |
| 0.54140114055933 | 0.94331933400800 | 0.19652463976800 | T | T | T |
| 0.87473447389267 | 0.27665266734133 | 0.19652463976800 | T | T | T |
| 0.87473447389267 | 0.60998600067467 | 0.19652463976800 | T | T | T |
| 0.87473447389267 | 0.94331933400800 | 0.19652463976800 | T | T | T |
| 0.20818810696067 | 0.16564888504867 | 0.19617928537600 | T | T | T |
| 0.20818810696067 | 0.49898221838200 | 0.19617928537600 | T | T | T |
| 0.20818810696067 | 0.83231555171533 | 0.19617928537600 | T | T | T |

|                  |                  |                  |   |   |   |
|------------------|------------------|------------------|---|---|---|
| 0.54152144029400 | 0.16564888504867 | 0.19617928537600 | T | T | T |
| 0.54152144029400 | 0.49898221838200 | 0.19617928537600 | T | T | T |
| 0.54152144029400 | 0.83231555171533 | 0.19617928537600 | T | T | T |
| 0.87485477362733 | 0.16564888504867 | 0.19617928537600 | T | T | T |
| 0.87485477362733 | 0.49898221838200 | 0.19617928537600 | T | T | T |
| 0.87485477362733 | 0.83231555171533 | 0.19617928537600 | T | T | T |
| 0.00065960501239 | 0.00751164775877 | 0.24470102805000 | T | T | T |
| 0.00065960501239 | 0.34084498109210 | 0.24470102805000 | T | T | T |
| 0.00065960501239 | 0.67417831442543 | 0.24470102805000 | T | T | T |
| 0.33399293834572 | 0.00751164775877 | 0.24470102805000 | T | T | T |
| 0.33399293834572 | 0.34084498109210 | 0.24470102805000 | T | T | T |
| 0.33399293834572 | 0.67417831442543 | 0.24470102805000 | T | T | T |
| 0.66732627167906 | 0.00751164775877 | 0.24470102805000 | T | T | T |
| 0.66732627167906 | 0.34084498109210 | 0.24470102805000 | T | T | T |
| 0.66732627167906 | 0.67417831442543 | 0.24470102805000 | T | T | T |
| 0.33251167257533 | 0.23004573751100 | 0.24483588074700 | T | T | T |
| 0.33251167257533 | 0.56337907084433 | 0.24483588074700 | T | T | T |
| 0.33251167257533 | 0.89671240417767 | 0.24483588074700 | T | T | T |
| 0.66584500590867 | 0.23004573751100 | 0.24483588074700 | T | T | T |
| 0.66584500590867 | 0.56337907084433 | 0.24483588074700 | T | T | T |
| 0.66584500590867 | 0.89671240417767 | 0.24483588074700 | T | T | T |
| 0.99917833924200 | 0.23004573751100 | 0.24483588074700 | T | T | T |
| 0.99917833924200 | 0.56337907084433 | 0.24483588074700 | T | T | T |
| 0.99917833924200 | 0.89671240417767 | 0.24483588074700 | T | T | T |
| 0.00091975548335 | 0.11946228397467 | 0.24481672245400 | T | T | T |
| 0.00091975548335 | 0.45279561730800 | 0.24481672245400 | T | T | T |
| 0.00091975548335 | 0.78612895064133 | 0.24481672245400 | T | T | T |
| 0.33425308881669 | 0.11946228397467 | 0.24481672245400 | T | T | T |
| 0.33425308881669 | 0.45279561730800 | 0.24481672245400 | T | T | T |
| 0.33425308881669 | 0.78612895064133 | 0.24481672245400 | T | T | T |



|                  |                  |                  |   |   |   |
|------------------|------------------|------------------|---|---|---|
| 0.66758642215002 | 0.11946228397467 | 0.24481672245400 | T | T | T |
| 0.66758642215002 | 0.45279561730800 | 0.24481672245400 | T | T | T |
| 0.66758642215002 | 0.78612895064133 | 0.24481672245400 | T | T | T |
| 0.16729557298833 | 0.00763375611217 | 0.24465857261300 | T | T | T |
| 0.16729557298833 | 0.34096708944550 | 0.24465857261300 | T | T | T |
| 0.16729557298833 | 0.67430042277883 | 0.24465857261300 | T | T | T |
| 0.50062890632167 | 0.00763375611217 | 0.24465857261300 | T | T | T |
| 0.50062890632167 | 0.34096708944550 | 0.24465857261300 | T | T | T |
| 0.50062890632167 | 0.67430042277883 | 0.24465857261300 | T | T | T |
| 0.83396223965500 | 0.00763375611217 | 0.24465857261300 | T | T | T |
| 0.83396223965500 | 0.34096708944550 | 0.24465857261300 | T | T | T |
| 0.83396223965500 | 0.67430042277883 | 0.24465857261300 | T | T | T |
| 0.16576617138900 | 0.22594960689267 | 0.24820929299000 | T | T | T |
| 0.16576617138900 | 0.55928294022600 | 0.24820929299000 | T | T | T |
| 0.16576617138900 | 0.89261627355933 | 0.24820929299000 | T | T | T |
| 0.49909950472233 | 0.22594960689267 | 0.24820929299000 | T | T | T |
| 0.49909950472233 | 0.55928294022600 | 0.24820929299000 | T | T | T |
| 0.49909950472233 | 0.89261627355933 | 0.24820929299000 | T | T | T |
| 0.83243283805567 | 0.22594960689267 | 0.24820929299000 | T | T | T |
| 0.83243283805567 | 0.55928294022600 | 0.24820929299000 | T | T | T |
| 0.83243283805567 | 0.89261627355933 | 0.24820929299000 | T | T | T |
| 0.16753386583667 | 0.11795919556467 | 0.24470436796700 | T | T | T |
| 0.16753386583667 | 0.45129252889800 | 0.24470436796700 | T | T | T |
| 0.16753386583667 | 0.78462586223133 | 0.24470436796700 | T | T | T |
| 0.50086719917000 | 0.11795919556467 | 0.24470436796700 | T | T | T |
| 0.50086719917000 | 0.45129252889800 | 0.24470436796700 | T | T | T |
| 0.50086719917000 | 0.78462586223133 | 0.24470436796700 | T | T | T |
| 0.83420053250333 | 0.11795919556467 | 0.24470436796700 | T | T | T |
| 0.83420053250333 | 0.45129252889800 | 0.24470436796700 | T | T | T |
| 0.83420053250333 | 0.78462586223133 | 0.24470436796700 | T | T | T |

|                  |                  |                  |   |   |   |
|------------------|------------------|------------------|---|---|---|
| 0.08349605048767 | 0.00743881544533 | 0.24458348253000 | T | T | T |
| 0.08349605048767 | 0.34077214877867 | 0.24458348253000 | T | T | T |
| 0.08349605048767 | 0.67410548211200 | 0.24458348253000 | T | T | T |
| 0.41682938382100 | 0.00743881544533 | 0.24458348253000 | T | T | T |
| 0.41682938382100 | 0.34077214877867 | 0.24458348253000 | T | T | T |
| 0.41682938382100 | 0.67410548211200 | 0.24458348253000 | T | T | T |
| 0.75016271715433 | 0.00743881544533 | 0.24458348253000 | T | T | T |
| 0.75016271715433 | 0.34077214877867 | 0.24458348253000 | T | T | T |
| 0.75016271715433 | 0.67410548211200 | 0.24458348253000 | T | T | T |
| 0.08140131549533 | 0.22972438344367 | 0.24475688039300 | T | T | T |
| 0.08140131549533 | 0.56305771677700 | 0.24475688039300 | T | T | T |
| 0.08140131549533 | 0.89639105011033 | 0.24475688039300 | T | T | T |
| 0.41473464882867 | 0.22972438344367 | 0.24475688039300 | T | T | T |
| 0.41473464882867 | 0.56305771677700 | 0.24475688039300 | T | T | T |
| 0.41473464882867 | 0.89639105011033 | 0.24475688039300 | T | T | T |
| 0.74806798216200 | 0.22972438344367 | 0.24475688039300 | T | T | T |
| 0.74806798216200 | 0.56305771677700 | 0.24475688039300 | T | T | T |
| 0.74806798216200 | 0.89639105011033 | 0.24475688039300 | T | T | T |
| 0.08334451206867 | 0.11947526782800 | 0.24480862040600 | T | T | T |
| 0.08334451206867 | 0.45280860116133 | 0.24480862040600 | T | T | T |
| 0.08334451206867 | 0.78614193449467 | 0.24480862040600 | T | T | T |
| 0.41667784540200 | 0.11947526782800 | 0.24480862040600 | T | T | T |
| 0.41667784540200 | 0.45280860116133 | 0.24480862040600 | T | T | T |
| 0.41667784540200 | 0.78614193449467 | 0.24480862040600 | T | T | T |
| 0.75001117873533 | 0.11947526782800 | 0.24480862040600 | T | T | T |
| 0.75001117873533 | 0.45280860116133 | 0.24480862040600 | T | T | T |
| 0.75001117873533 | 0.78614193449467 | 0.24480862040600 | T | T | T |
| 0.25026182098667 | 0.00748801255903 | 0.24458110052400 | T | T | T |
| 0.25026182098667 | 0.34082134589237 | 0.24458110052400 | T | T | T |
| 0.25026182098667 | 0.67415467922570 | 0.24458110052400 | T | T | T |

|                  |                  |                  |   |   |   |
|------------------|------------------|------------------|---|---|---|
| 0.58359515432000 | 0.00748801255903 | 0.24458110052400 | T | T | T |
| 0.58359515432000 | 0.34082134589237 | 0.24458110052400 | T | T | T |
| 0.58359515432000 | 0.67415467922570 | 0.24458110052400 | T | T | T |
| 0.91692848765333 | 0.00748801255903 | 0.24458110052400 | T | T | T |
| 0.91692848765333 | 0.34082134589237 | 0.24458110052400 | T | T | T |
| 0.91692848765333 | 0.67415467922570 | 0.24458110052400 | T | T | T |
| 0.25020128847533 | 0.22975411641233 | 0.24443355765600 | T | T | T |
| 0.25020128847533 | 0.56308744974567 | 0.24443355765600 | T | T | T |
| 0.25020128847533 | 0.89642078307900 | 0.24443355765600 | T | T | T |
| 0.58353462180867 | 0.22975411641233 | 0.24443355765600 | T | T | T |
| 0.58353462180867 | 0.56308744974567 | 0.24443355765600 | T | T | T |
| 0.58353462180867 | 0.89642078307900 | 0.24443355765600 | T | T | T |
| 0.91686795514200 | 0.22975411641233 | 0.24443355765600 | T | T | T |
| 0.91686795514200 | 0.56308744974567 | 0.24443355765600 | T | T | T |
| 0.91686795514200 | 0.89642078307900 | 0.24443355765600 | T | T | T |
| 0.25177086313767 | 0.11947809130033 | 0.24482341355400 | T | T | T |
| 0.25177086313767 | 0.45281142463367 | 0.24482341355400 | T | T | T |
| 0.25177086313767 | 0.78614475796700 | 0.24482341355400 | T | T | T |
| 0.58510419647100 | 0.11947809130033 | 0.24482341355400 | T | T | T |
| 0.58510419647100 | 0.45281142463367 | 0.24482341355400 | T | T | T |
| 0.58510419647100 | 0.78614475796700 | 0.24482341355400 | T | T | T |
| 0.91843752980433 | 0.11947809130033 | 0.24482341355400 | T | T | T |
| 0.91843752980433 | 0.45281142463367 | 0.24482341355400 | T | T | T |
| 0.91843752980433 | 0.78614475796700 | 0.24482341355400 | T | T | T |
| 0.12505254579167 | 0.03080336749810 | 0.99511786802300 | T | T | T |
| 0.12505254579167 | 0.36413670083143 | 0.99511786802300 | T | T | T |
| 0.12505254579167 | 0.69747003416477 | 0.99511786802300 | T | T | T |
| 0.45838587912500 | 0.03080336749810 | 0.99511786802300 | T | T | T |
| 0.45838587912500 | 0.36413670083143 | 0.99511786802300 | T | T | T |
| 0.45838587912500 | 0.69747003416477 | 0.99511786802300 | T | T | T |

|                  |                  |                  |   |   |   |
|------------------|------------------|------------------|---|---|---|
| 0.79171921245833 | 0.03080336749810 | 0.99511786802300 | T | T | T |
| 0.79171921245833 | 0.36413670083143 | 0.99511786802300 | T | T | T |
| 0.79171921245833 | 0.69747003416477 | 0.99511786802300 | T | T | T |
| 0.12464294902167 | 0.25124335844667 | 0.99759703214300 | T | T | T |
| 0.12464294902167 | 0.58457669178000 | 0.99759703214300 | T | T | T |
| 0.12464294902167 | 0.91791002511333 | 0.99759703214300 | T | T | T |
| 0.45797628235500 | 0.25124335844667 | 0.99759703214300 | T | T | T |
| 0.45797628235500 | 0.58457669178000 | 0.99759703214300 | T | T | T |
| 0.45797628235500 | 0.91791002511333 | 0.99759703214300 | T | T | T |
| 0.79130961568833 | 0.25124335844667 | 0.99759703214300 | T | T | T |
| 0.79130961568833 | 0.58457669178000 | 0.99759703214300 | T | T | T |
| 0.79130961568833 | 0.91791002511333 | 0.99759703214300 | T | T | T |
| 0.12413938468967 | 0.14118277978900 | 0.99582181706900 | T | T | T |
| 0.12413938468967 | 0.47451611312233 | 0.99582181706900 | T | T | T |
| 0.12413938468967 | 0.80784944645567 | 0.99582181706900 | T | T | T |
| 0.45747271802300 | 0.14118277978900 | 0.99582181706900 | T | T | T |
| 0.45747271802300 | 0.47451611312233 | 0.99582181706900 | T | T | T |
| 0.45747271802300 | 0.80784944645567 | 0.99582181706900 | T | T | T |
| 0.79080605135633 | 0.14118277978900 | 0.99582181706900 | T | T | T |
| 0.79080605135633 | 0.47451611312233 | 0.99582181706900 | T | T | T |
| 0.79080605135633 | 0.80784944645567 | 0.99582181706900 | T | T | T |
| 0.29208207279733 | 0.03040066669060 | 0.99542155328700 | T | T | T |
| 0.29208207279733 | 0.36373400002393 | 0.99542155328700 | T | T | T |
| 0.29208207279733 | 0.69706733335727 | 0.99542155328700 | T | T | T |
| 0.62541540613067 | 0.03040066669060 | 0.99542155328700 | T | T | T |
| 0.62541540613067 | 0.36373400002393 | 0.99542155328700 | T | T | T |
| 0.62541540613067 | 0.69706733335727 | 0.99542155328700 | T | T | T |
| 0.95874873946400 | 0.03040066669060 | 0.99542155328700 | T | T | T |
| 0.95874873946400 | 0.36373400002393 | 0.99542155328700 | T | T | T |
| 0.95874873946400 | 0.69706733335727 | 0.99542155328700 | T | T | T |

|                  |                  |                  |   |   |   |
|------------------|------------------|------------------|---|---|---|
| 0.29082349413133 | 0.25283208903433 | 0.99518800030500 | T | T | T |
| 0.29082349413133 | 0.58616542236767 | 0.99518800030500 | T | T | T |
| 0.29082349413133 | 0.91949875570100 | 0.99518800030500 | T | T | T |
| 0.62415682746467 | 0.25283208903433 | 0.99518800030500 | T | T | T |
| 0.62415682746467 | 0.58616542236767 | 0.99518800030500 | T | T | T |
| 0.62415682746467 | 0.91949875570100 | 0.99518800030500 | T | T | T |
| 0.95749016079800 | 0.25283208903433 | 0.99518800030500 | T | T | T |
| 0.95749016079800 | 0.58616542236767 | 0.99518800030500 | T | T | T |
| 0.95749016079800 | 0.91949875570100 | 0.99518800030500 | T | T | T |
| 0.29145422710767 | 0.14210838427300 | 0.99477443200700 | T | T | T |
| 0.29145422710767 | 0.47544171760633 | 0.99477443200700 | T | T | T |
| 0.29145422710767 | 0.80877505093967 | 0.99477443200700 | T | T | T |
| 0.62478756044100 | 0.14210838427300 | 0.99477443200700 | T | T | T |
| 0.62478756044100 | 0.47544171760633 | 0.99477443200700 | T | T | T |
| 0.62478756044100 | 0.80877505093967 | 0.99477443200700 | T | T | T |
| 0.95812089377433 | 0.14210838427300 | 0.99477443200700 | T | T | T |
| 0.95812089377433 | 0.47544171760633 | 0.99477443200700 | T | T | T |
| 0.95812089377433 | 0.80877505093967 | 0.99477443200700 | T | T | T |
| 0.04199887991600 | 0.03067605989560 | 0.99519857691600 | T | T | T |
| 0.04199887991600 | 0.36400939322893 | 0.99519857691600 | T | T | T |
| 0.04199887991600 | 0.69734272656227 | 0.99519857691600 | T | T | T |
| 0.37533221324933 | 0.03067605989560 | 0.99519857691600 | T | T | T |
| 0.37533221324933 | 0.36400939322893 | 0.99519857691600 | T | T | T |
| 0.37533221324933 | 0.69734272656227 | 0.99519857691600 | T | T | T |
| 0.70866554658267 | 0.03067605989560 | 0.99519857691600 | T | T | T |
| 0.70866554658267 | 0.36400939322893 | 0.99519857691600 | T | T | T |
| 0.70866554658267 | 0.69734272656227 | 0.99519857691600 | T | T | T |
| 0.04059891762667 | 0.25320068376733 | 0.99458510972100 | T | T | T |
| 0.04059891762667 | 0.58653401710067 | 0.99458510972100 | T | T | T |
| 0.04059891762667 | 0.91986735043400 | 0.99458510972100 | T | T | T |

|                  |                  |                  |   |   |   |
|------------------|------------------|------------------|---|---|---|
| 0.37393225096000 | 0.25320068376733 | 0.99458510972100 | T | T | T |
| 0.37393225096000 | 0.58653401710067 | 0.99458510972100 | T | T | T |
| 0.37393225096000 | 0.91986735043400 | 0.99458510972100 | T | T | T |
| 0.70726558429333 | 0.25320068376733 | 0.99458510972100 | T | T | T |
| 0.70726558429333 | 0.58653401710067 | 0.99458510972100 | T | T | T |
| 0.70726558429333 | 0.91986735043400 | 0.99458510972100 | T | T | T |
| 0.04063732940067 | 0.14162761379800 | 0.99502208938200 | T | T | T |
| 0.04063732940067 | 0.47496094713133 | 0.99502208938200 | T | T | T |
| 0.04063732940067 | 0.80829428046467 | 0.99502208938200 | T | T | T |
| 0.37397066273400 | 0.14162761379800 | 0.99502208938200 | T | T | T |
| 0.37397066273400 | 0.47496094713133 | 0.99502208938200 | T | T | T |
| 0.37397066273400 | 0.80829428046467 | 0.99502208938200 | T | T | T |
| 0.70730399606733 | 0.14162761379800 | 0.99502208938200 | T | T | T |
| 0.70730399606733 | 0.47496094713133 | 0.99502208938200 | T | T | T |
| 0.70730399606733 | 0.80829428046467 | 0.99502208938200 | T | T | T |
| 0.20905948969100 | 0.03119128230283 | 0.99496115325000 | T | T | T |
| 0.20905948969100 | 0.36452461563617 | 0.99496115325000 | T | T | T |
| 0.20905948969100 | 0.69785794896950 | 0.99496115325000 | T | T | T |
| 0.54239282302433 | 0.03119128230283 | 0.99496115325000 | T | T | T |
| 0.54239282302433 | 0.36452461563617 | 0.99496115325000 | T | T | T |
| 0.54239282302433 | 0.69785794896950 | 0.99496115325000 | T | T | T |
| 0.87572615635767 | 0.03119128230283 | 0.99496115325000 | T | T | T |
| 0.87572615635767 | 0.36452461563617 | 0.99496115325000 | T | T | T |
| 0.87572615635767 | 0.69785794896950 | 0.99496115325000 | T | T | T |
| 0.20735241674500 | 0.25111330685900 | 0.99848809934100 | T | T | T |
| 0.20735241674500 | 0.58444664019233 | 0.99848809934100 | T | T | T |
| 0.20735241674500 | 0.91777997352567 | 0.99848809934100 | T | T | T |
| 0.54068575007833 | 0.25111330685900 | 0.99848809934100 | T | T | T |
| 0.54068575007833 | 0.58444664019233 | 0.99848809934100 | T | T | T |
| 0.54068575007833 | 0.91777997352567 | 0.99848809934100 | T | T | T |

|                  |                  |                  |   |   |   |
|------------------|------------------|------------------|---|---|---|
| 0.87401908341167 | 0.25111330685900 | 0.99848809934100 | T | T | T |
| 0.87401908341167 | 0.58444664019233 | 0.99848809934100 | T | T | T |
| 0.87401908341167 | 0.91777997352567 | 0.99848809934100 | T | T | T |
| 0.20720929147433 | 0.14140756030167 | 0.99630652525000 | T | T | T |
| 0.20720929147433 | 0.47474089363500 | 0.99630652525000 | T | T | T |
| 0.20720929147433 | 0.80807422696833 | 0.99630652525000 | T | T | T |
| 0.54054262480767 | 0.14140756030167 | 0.99630652525000 | T | T | T |
| 0.54054262480767 | 0.47474089363500 | 0.99630652525000 | T | T | T |
| 0.54054262480767 | 0.80807422696833 | 0.99630652525000 | T | T | T |
| 0.87387595814100 | 0.14140756030167 | 0.99630652525000 | T | T | T |
| 0.87387595814100 | 0.47474089363500 | 0.99630652525000 | T | T | T |
| 0.87387595814100 | 0.80807422696833 | 0.99630652525000 | T | T | T |
| 0.33319051143133 | 0.08261713360233 | 0.06675941583760 | T | T | T |
| 0.33319051143133 | 0.41595046693567 | 0.06675941583760 | T | T | T |
| 0.33319051143133 | 0.74928380026900 | 0.06675941583760 | T | T | T |
| 0.66652384476467 | 0.08261713360233 | 0.06675941583760 | T | T | T |
| 0.66652384476467 | 0.41595046693567 | 0.06675941583760 | T | T | T |
| 0.66652384476467 | 0.74928380026900 | 0.06675941583760 | T | T | T |
| 0.99985717809800 | 0.08261713360233 | 0.06675941583760 | T | T | T |
| 0.99985717809800 | 0.41595046693567 | 0.06675941583760 | T | T | T |
| 0.99985717809800 | 0.74928380026900 | 0.06675941583760 | T | T | T |
| 0.00013182676190 | 0.30483472398967 | 0.06657924366860 | T | T | T |
| 0.00013182676190 | 0.63816805732300 | 0.06657924366860 | T | T | T |
| 0.00013182676190 | 0.97150139065633 | 0.06657924366860 | T | T | T |
| 0.33346516009523 | 0.30483472398967 | 0.06657924366860 | T | T | T |
| 0.33346516009523 | 0.63816805732300 | 0.06657924366860 | T | T | T |
| 0.33346516009523 | 0.97150139065633 | 0.06657924366860 | T | T | T |
| 0.66679849342857 | 0.30483472398967 | 0.06657924366860 | T | T | T |
| 0.66679849342857 | 0.63816805732300 | 0.06657924366860 | T | T | T |
| 0.66679849342857 | 0.97150139065633 | 0.06657924366860 | T | T | T |

|                  |                  |                  |   |   |   |
|------------------|------------------|------------------|---|---|---|
| 0.33309915668367 | 0.19397372933067 | 0.06639421255370 | T | T | T |
| 0.33309915668367 | 0.52730706266400 | 0.06639421255370 | T | T | T |
| 0.33309915668367 | 0.86064039599733 | 0.06639421255370 | T | T | T |
| 0.66643249001700 | 0.19397372933067 | 0.06639421255370 | T | T | T |
| 0.66643249001700 | 0.52730706266400 | 0.06639421255370 | T | T | T |
| 0.66643249001700 | 0.86064039599733 | 0.06639421255370 | T | T | T |
| 0.99976582335033 | 0.19397372933067 | 0.06639421255370 | T | T | T |
| 0.99976582335033 | 0.52730706266400 | 0.06639421255370 | T | T | T |
| 0.99976582335033 | 0.86064039599733 | 0.06639421255370 | T | T | T |
| 0.16649580334467 | 0.08251779696233 | 0.06695365774990 | T | T | T |
| 0.16649580334467 | 0.41585113029567 | 0.06695365774990 | T | T | T |
| 0.16649580334467 | 0.74918446362900 | 0.06695365774990 | T | T | T |
| 0.49982913667800 | 0.08251779696233 | 0.06695365774990 | T | T | T |
| 0.49982913667800 | 0.41585113029567 | 0.06695365774990 | T | T | T |
| 0.49982913667800 | 0.74918446362900 | 0.06695365774990 | T | T | T |
| 0.83316247001133 | 0.08251779696233 | 0.06695365774990 | T | T | T |
| 0.83316247001133 | 0.41585113029567 | 0.06695365774990 | T | T | T |
| 0.83316247001133 | 0.74918446362900 | 0.06695365774990 | T | T | T |
| 0.16667509201567 | 0.30563421571433 | 0.06583152570190 | T | T | T |
| 0.16667509201567 | 0.63896754904767 | 0.06583152570190 | T | T | T |
| 0.16667509201567 | 0.97230088238100 | 0.06583152570190 | T | T | T |
| 0.50000842534900 | 0.30563421571433 | 0.06583152570190 | T | T | T |
| 0.50000842534900 | 0.63896754904767 | 0.06583152570190 | T | T | T |
| 0.50000842534900 | 0.97230088238100 | 0.06583152570190 | T | T | T |
| 0.83334175868233 | 0.30563421571433 | 0.06583152570190 | T | T | T |
| 0.83334175868233 | 0.63896754904767 | 0.06583152570190 | T | T | T |
| 0.83334175868233 | 0.97230088238100 | 0.06583152570190 | T | T | T |
| 0.16597041448133 | 0.19274116096800 | 0.06904191377160 | T | T | T |
| 0.16597041448133 | 0.52607449430133 | 0.06904191377160 | T | T | T |
| 0.16597041448133 | 0.85940782763467 | 0.06904191377160 | T | T | T |



|                  |                   |                  |   |   |   |
|------------------|-------------------|------------------|---|---|---|
| 0.49930374781467 | 0.19274116096800  | 0.06904191377160 | T | T | T |
| 0.49930374781467 | 0.52607449430133  | 0.06904191377160 | T | T | T |
| 0.49930374781467 | 0.85940782763467  | 0.06904191377160 | T | T | T |
| 0.83263708114800 | 0.19274116096800  | 0.06904191377160 | T | T | T |
| 0.83263708114800 | 0.52607449430133  | 0.06904191377160 | T | T | T |
| 0.83263708114800 | 0.85940782763467  | 0.06904191377160 | T | T | T |
| 0.08332155162867 | 0.08254828599900  | 0.06675689954130 | T | T | T |
| 0.08332155162867 | 0.41588161933233  | 0.06675689954130 | T | T | T |
| 0.08332155162867 | 0.74921495266567  | 0.06675689954130 | T | T | T |
| 0.41665488496200 | 0.08254828599900  | 0.06675689954130 | T | T | T |
| 0.41665488496200 | 0.41588161933233  | 0.06675689954130 | T | T | T |
| 0.41665488496200 | 0.74921495266567  | 0.06675689954130 | T | T | T |
| 0.74998821829533 | 0.08254828599900  | 0.06675689954130 | T | T | T |
| 0.74998821829533 | 0.41588161933233  | 0.06675689954130 | T | T | T |
| 0.74998821829533 | 0.74921495266567  | 0.06675689954130 | T | T | T |
| 0.08321011168100 | 0.30470899474967  | 0.06638638812100 | T | T | T |
| 0.08321011168100 | 0.63804232808300  | 0.06638638812100 | T | T | T |
| 0.08321011168100 | 0.97137566141633  | 0.06638638812100 | T | T | T |
| 0.41654344501433 | 0.30470899474967  | 0.06638638812100 | T | T | T |
| 0.41654344501433 | 0.63804232808300  | 0.06638638812100 | T | T | T |
| 0.41654344501433 | 0.97137566141633  | 0.06638638812100 | T | T | T |
| 0.74987677834767 | 0.30470899474967  | 0.06638638812100 | T | T | T |
| 0.74987677834767 | 0.63804232808300  | 0.06638638812100 | T | T | T |
| 0.74987677834767 | 0.97137566141633  | 0.06638638812100 | T | T | T |
| 0.08263324814300 | 0.19386395111467  | 0.06636887187800 | T | T | T |
| 0.08263324814300 | 0.527197284444800 | 0.06636887187800 | T | T | T |
| 0.08263324814300 | 0.86053061778133  | 0.06636887187800 | T | T | T |
| 0.41596658147633 | 0.19386395111467  | 0.06636887187800 | T | T | T |
| 0.41596658147633 | 0.527197284444800 | 0.06636887187800 | T | T | T |
| 0.41596658147633 | 0.86053061778133  | 0.06636887187800 | T | T | T |

|                  |                  |                  |   |   |   |
|------------------|------------------|------------------|---|---|---|
| 0.74929991480967 | 0.19386395111467 | 0.06636887187800 | T | T | T |
| 0.74929991480967 | 0.52719728444800 | 0.06636887187800 | T | T | T |
| 0.74929991480967 | 0.86053061778133 | 0.06636887187800 | T | T | T |
| 0.24991733818200 | 0.08304354066333 | 0.06624495581950 | T | T | T |
| 0.24991733818200 | 0.41637687399667 | 0.06624495581950 | T | T | T |
| 0.24991733818200 | 0.74971020733000 | 0.06624495581950 | T | T | T |
| 0.58325067151533 | 0.08304354066333 | 0.06624495581950 | T | T | T |
| 0.58325067151533 | 0.41637687399667 | 0.06624495581950 | T | T | T |
| 0.58325067151533 | 0.74971020733000 | 0.06624495581950 | T | T | T |
| 0.91658400484867 | 0.08304354066333 | 0.06624495581950 | T | T | T |
| 0.91658400484867 | 0.41637687399667 | 0.06624495581950 | T | T | T |
| 0.91658400484867 | 0.74971020733000 | 0.06624495581950 | T | T | T |
| 0.25020070403967 | 0.30482923118500 | 0.06639104415680 | T | T | T |
| 0.25020070403967 | 0.63816256451833 | 0.06639104415680 | T | T | T |
| 0.25020070403967 | 0.97149589785167 | 0.06639104415680 | T | T | T |
| 0.58353403737300 | 0.30482923118500 | 0.06639104415680 | T | T | T |
| 0.58353403737300 | 0.63816256451833 | 0.06639104415680 | T | T | T |
| 0.58353403737300 | 0.97149589785167 | 0.06639104415680 | T | T | T |
| 0.91686737070633 | 0.30482923118500 | 0.06639104415680 | T | T | T |
| 0.91686737070633 | 0.63816256451833 | 0.06639104415680 | T | T | T |
| 0.91686737070633 | 0.97149589785167 | 0.06639104415680 | T | T | T |
| 0.24981962309567 | 0.19320332420833 | 0.06736031049910 | T | T | T |
| 0.24981962309567 | 0.52653665754167 | 0.06736031049910 | T | T | T |
| 0.24981962309567 | 0.85986999087500 | 0.06736031049910 | T | T | T |
| 0.58315295642900 | 0.19320332420833 | 0.06736031049910 | T | T | T |
| 0.58315295642900 | 0.52653665754167 | 0.06736031049910 | T | T | T |
| 0.58315295642900 | 0.85986999087500 | 0.06736031049910 | T | T | T |
| 0.91648628976233 | 0.19320332420833 | 0.06736031049910 | T | T | T |
| 0.91648628976233 | 0.52653665754167 | 0.06736031049910 | T | T | T |
| 0.91648628976233 | 0.85986999087500 | 0.06736031049910 | T | T | T |

|                  |                  |                  |   |   |   |
|------------------|------------------|------------------|---|---|---|
| 0.04166666667400 | 0.02777666599467 | 0.13043999673400 | F | F | F |
| 0.04166666667400 | 0.36110999932800 | 0.13043999673400 | F | F | F |
| 0.04166666667400 | 0.69444333266133 | 0.13043999673400 | F | F | F |
| 0.37500000000733 | 0.02777666599467 | 0.13043999673400 | F | F | F |
| 0.37500000000733 | 0.36110999932800 | 0.13043999673400 | F | F | F |
| 0.37500000000733 | 0.69444333266133 | 0.13043999673400 | F | F | F |
| 0.70833333334067 | 0.02777666599467 | 0.13043999673400 | F | F | F |
| 0.70833333334067 | 0.36110999932800 | 0.13043999673400 | F | F | F |
| 0.70833333334067 | 0.69444333266133 | 0.13043999673400 | F | F | F |
| 0.04166666667400 | 0.24999999994967 | 0.13043999673400 | F | F | F |
| 0.04166666667400 | 0.5833333328300  | 0.13043999673400 | F | F | F |
| 0.04166666667400 | 0.9166666661633  | 0.13043999673400 | F | F | F |
| 0.37500000000733 | 0.24999999994967 | 0.13043999673400 | F | F | F |
| 0.37500000000733 | 0.5833333328300  | 0.13043999673400 | F | F | F |
| 0.37500000000733 | 0.9166666661633  | 0.13043999673400 | F | F | F |
| 0.70833333334067 | 0.24999999994967 | 0.13043999673400 | F | F | F |
| 0.70833333334067 | 0.5833333328300  | 0.13043999673400 | F | F | F |
| 0.70833333334067 | 0.9166666661633  | 0.13043999673400 | F | F | F |
| 0.04166666667400 | 0.13888999819033 | 0.13043999673400 | F | F | F |
| 0.04166666667400 | 0.47222333152367 | 0.13043999673400 | F | F | F |
| 0.04166666667400 | 0.80555666485700 | 0.13043999673400 | F | F | F |
| 0.37500000000733 | 0.13888999819033 | 0.13043999673400 | F | F | F |
| 0.37500000000733 | 0.47222333152367 | 0.13043999673400 | F | F | F |
| 0.37500000000733 | 0.80555666485700 | 0.13043999673400 | F | F | F |
| 0.70833333334067 | 0.13888999819033 | 0.13043999673400 | F | F | F |
| 0.70833333334067 | 0.47222333152367 | 0.13043999673400 | F | F | F |
| 0.70833333334067 | 0.80555666485700 | 0.13043999673400 | F | F | F |
| 0.20833333332800 | 0.02777666599467 | 0.13043999673400 | F | F | F |
| 0.20833333332800 | 0.36110999932800 | 0.13043999673400 | F | F | F |
| 0.20833333332800 | 0.69444333266133 | 0.13043999673400 | F | F | F |

|                  |                  |                  |   |   |   |
|------------------|------------------|------------------|---|---|---|
| 0.54166666666133 | 0.02777666599467 | 0.13043999673400 | F | F | F |
| 0.54166666666133 | 0.36110999932800 | 0.13043999673400 | F | F | F |
| 0.54166666666133 | 0.69444333266133 | 0.13043999673400 | F | F | F |
| 0.87499999999467 | 0.02777666599467 | 0.13043999673400 | F | F | F |
| 0.87499999999467 | 0.36110999932800 | 0.13043999673400 | F | F | F |
| 0.87499999999467 | 0.69444333266133 | 0.13043999673400 | F | F | F |
| 0.20833333332800 | 0.2499999994967  | 0.13043999673400 | F | F | F |
| 0.20833333332800 | 0.5833333328300  | 0.13043999673400 | F | F | F |
| 0.20833333332800 | 0.9166666661633  | 0.13043999673400 | F | F | F |
| 0.54166666666133 | 0.2499999994967  | 0.13043999673400 | F | F | F |
| 0.54166666666133 | 0.5833333328300  | 0.13043999673400 | F | F | F |
| 0.54166666666133 | 0.9166666661633  | 0.13043999673400 | F | F | F |
| 0.87499999999467 | 0.2499999994967  | 0.13043999673400 | F | F | F |
| 0.87499999999467 | 0.5833333328300  | 0.13043999673400 | F | F | F |
| 0.87499999999467 | 0.9166666661633  | 0.13043999673400 | F | F | F |
| 0.20833333332800 | 0.13888999819033 | 0.13043999673400 | F | F | F |
| 0.20833333332800 | 0.47222333152367 | 0.13043999673400 | F | F | F |
| 0.20833333332800 | 0.80555666485700 | 0.13043999673400 | F | F | F |
| 0.54166666666133 | 0.13888999819033 | 0.13043999673400 | F | F | F |
| 0.54166666666133 | 0.47222333152367 | 0.13043999673400 | F | F | F |
| 0.54166666666133 | 0.80555666485700 | 0.13043999673400 | F | F | F |
| 0.87499999999467 | 0.13888999819033 | 0.13043999673400 | F | F | F |
| 0.87499999999467 | 0.47222333152367 | 0.13043999673400 | F | F | F |
| 0.87499999999467 | 0.80555666485700 | 0.13043999673400 | F | F | F |
| 0.12500000000133 | 0.02777666599467 | 0.13043999673400 | F | F | F |
| 0.12500000000133 | 0.36110999932800 | 0.13043999673400 | F | F | F |
| 0.12500000000133 | 0.69444333266133 | 0.13043999673400 | F | F | F |
| 0.45833333333467 | 0.02777666599467 | 0.13043999673400 | F | F | F |
| 0.45833333333467 | 0.36110999932800 | 0.13043999673400 | F | F | F |
| 0.45833333333467 | 0.69444333266133 | 0.13043999673400 | F | F | F |

|                  |                  |                  |   |   |   |
|------------------|------------------|------------------|---|---|---|
| 0.79166666666800 | 0.02777666599467 | 0.13043999673400 | F | F | F |
| 0.79166666666800 | 0.36110999932800 | 0.13043999673400 | F | F | F |
| 0.79166666666800 | 0.69444333266133 | 0.13043999673400 | F | F | F |
| 0.12500000000133 | 0.2499999994967  | 0.13043999673400 | F | F | F |
| 0.12500000000133 | 0.5833333328300  | 0.13043999673400 | F | F | F |
| 0.12500000000133 | 0.9166666661633  | 0.13043999673400 | F | F | F |
| 0.45833333333467 | 0.2499999994967  | 0.13043999673400 | F | F | F |
| 0.45833333333467 | 0.5833333328300  | 0.13043999673400 | F | F | F |
| 0.45833333333467 | 0.9166666661633  | 0.13043999673400 | F | F | F |
| 0.79166666666800 | 0.2499999994967  | 0.13043999673400 | F | F | F |
| 0.79166666666800 | 0.5833333328300  | 0.13043999673400 | F | F | F |
| 0.79166666666800 | 0.9166666661633  | 0.13043999673400 | F | F | F |
| 0.12500000000133 | 0.13888999819033 | 0.13043999673400 | F | F | F |
| 0.12500000000133 | 0.47222333152367 | 0.13043999673400 | F | F | F |
| 0.12500000000133 | 0.80555666485700 | 0.13043999673400 | F | F | F |
| 0.45833333333467 | 0.13888999819033 | 0.13043999673400 | F | F | F |
| 0.45833333333467 | 0.47222333152367 | 0.13043999673400 | F | F | F |
| 0.45833333333467 | 0.80555666485700 | 0.13043999673400 | F | F | F |
| 0.79166666666800 | 0.13888999819033 | 0.13043999673400 | F | F | F |
| 0.79166666666800 | 0.47222333152367 | 0.13043999673400 | F | F | F |
| 0.79166666666800 | 0.80555666485700 | 0.13043999673400 | F | F | F |
| 0.29166666669833 | 0.02777666599467 | 0.13043999673400 | F | F | F |
| 0.29166666669833 | 0.36110999932800 | 0.13043999673400 | F | F | F |
| 0.29166666669833 | 0.69444333266133 | 0.13043999673400 | F | F | F |
| 0.62500000003167 | 0.02777666599467 | 0.13043999673400 | F | F | F |
| 0.62500000003167 | 0.36110999932800 | 0.13043999673400 | F | F | F |
| 0.62500000003167 | 0.69444333266133 | 0.13043999673400 | F | F | F |
| 0.95833333336500 | 0.02777666599467 | 0.13043999673400 | F | F | F |
| 0.95833333336500 | 0.36110999932800 | 0.13043999673400 | F | F | F |
| 0.95833333336500 | 0.69444333266133 | 0.13043999673400 | F | F | F |

|                  |                  |                  |   |   |   |
|------------------|------------------|------------------|---|---|---|
| 0.29166666669833 | 0.24999999994967 | 0.13043999673400 | F | F | F |
| 0.29166666669833 | 0.58333333328300 | 0.13043999673400 | F | F | F |
| 0.29166666669833 | 0.91666666661633 | 0.13043999673400 | F | F | F |
| 0.62500000003167 | 0.24999999994967 | 0.13043999673400 | F | F | F |
| 0.62500000003167 | 0.58333333328300 | 0.13043999673400 | F | F | F |
| 0.62500000003167 | 0.91666666661633 | 0.13043999673400 | F | F | F |
| 0.95833333336500 | 0.24999999994967 | 0.13043999673400 | F | F | F |
| 0.95833333336500 | 0.58333333328300 | 0.13043999673400 | F | F | F |
| 0.95833333336500 | 0.91666666661633 | 0.13043999673400 | F | F | F |
| 0.29166666669833 | 0.13888999819033 | 0.13043999673400 | F | F | F |
| 0.29166666669833 | 0.47222333152367 | 0.13043999673400 | F | F | F |
| 0.29166666669833 | 0.80555666485700 | 0.13043999673400 | F | F | F |
| 0.62500000003167 | 0.13888999819033 | 0.13043999673400 | F | F | F |
| 0.62500000003167 | 0.47222333152367 | 0.13043999673400 | F | F | F |
| 0.62500000003167 | 0.80555666485700 | 0.13043999673400 | F | F | F |
| 0.95833333336500 | 0.13888999819033 | 0.13043999673400 | F | F | F |
| 0.95833333336500 | 0.47222333152367 | 0.13043999673400 | F | F | F |
| 0.95833333336500 | 0.80555666485700 | 0.13043999673400 | F | F | F |
| 0.00021971297092 | 0.08312741846833 | 0.19466447298800 | T | T | T |
| 0.00021971297092 | 0.41646075180167 | 0.19466447298800 | T | T | T |
| 0.00021971297092 | 0.74979408513500 | 0.19466447298800 | T | T | T |
| 0.33355304630425 | 0.08312741846833 | 0.19466447298800 | T | T | T |
| 0.33355304630425 | 0.41646075180167 | 0.19466447298800 | T | T | T |
| 0.33355304630425 | 0.74979408513500 | 0.19466447298800 | T | T | T |
| 0.66688637963759 | 0.08312741846833 | 0.19466447298800 | T | T | T |
| 0.66688637963759 | 0.41646075180167 | 0.19466447298800 | T | T | T |
| 0.66688637963759 | 0.74979408513500 | 0.19466447298800 | T | T | T |
| 0.00006575015583 | 0.30478531491933 | 0.19428611215900 | T | T | T |
| 0.00006575015583 | 0.63811864825267 | 0.19428611215900 | T | T | T |
| 0.00006575015583 | 0.97145198158600 | 0.19428611215900 | T | T | T |

|                  |                  |                  |   |   |   |
|------------------|------------------|------------------|---|---|---|
| 0.33339908348916 | 0.30478531491933 | 0.19428611215900 | T | T | T |
| 0.33339908348916 | 0.63811864825267 | 0.19428611215900 | T | T | T |
| 0.33339908348916 | 0.97145198158600 | 0.19428611215900 | T | T | T |
| 0.66673241682250 | 0.30478531491933 | 0.19428611215900 | T | T | T |
| 0.66673241682250 | 0.63811864825267 | 0.19428611215900 | T | T | T |
| 0.66673241682250 | 0.97145198158600 | 0.19428611215900 | T | T | T |
| 0.33327435201033 | 0.19402954735167 | 0.19436206182200 | T | T | T |
| 0.33327435201033 | 0.52736288068500 | 0.19436206182200 | T | T | T |
| 0.33327435201033 | 0.86069621401833 | 0.19436206182200 | T | T | T |
| 0.66660768534367 | 0.19402954735167 | 0.19436206182200 | T | T | T |
| 0.66660768534367 | 0.52736288068500 | 0.19436206182200 | T | T | T |
| 0.66660768534367 | 0.86069621401833 | 0.19436206182200 | T | T | T |
| 0.99994101867700 | 0.19402954735167 | 0.19436206182200 | T | T | T |
| 0.99994101867700 | 0.52736288068500 | 0.19436206182200 | T | T | T |
| 0.99994101867700 | 0.86069621401833 | 0.19436206182200 | T | T | T |
| 0.16697800617067 | 0.08253918251167 | 0.19399696431200 | T | T | T |
| 0.16697800617067 | 0.41587251584500 | 0.19399696431200 | T | T | T |
| 0.16697800617067 | 0.74920584917833 | 0.19399696431200 | T | T | T |
| 0.50031133950400 | 0.08253918251167 | 0.19399696431200 | T | T | T |
| 0.50031133950400 | 0.41587251584500 | 0.19399696431200 | T | T | T |
| 0.50031133950400 | 0.74920584917833 | 0.19399696431200 | T | T | T |
| 0.83364467283733 | 0.08253918251167 | 0.19399696431200 | T | T | T |
| 0.83364467283733 | 0.41587251584500 | 0.19399696431200 | T | T | T |
| 0.83364467283733 | 0.74920584917833 | 0.19399696431200 | T | T | T |
| 0.16671149773667 | 0.30464939372933 | 0.19456538925300 | T | T | T |
| 0.16671149773667 | 0.63798272706267 | 0.19456538925300 | T | T | T |
| 0.16671149773667 | 0.97131606039600 | 0.19456538925300 | T | T | T |
| 0.50004483107000 | 0.30464939372933 | 0.19456538925300 | T | T | T |
| 0.50004483107000 | 0.63798272706267 | 0.19456538925300 | T | T | T |
| 0.50004483107000 | 0.97131606039600 | 0.19456538925300 | T | T | T |

|                  |                  |                  |   |   |   |
|------------------|------------------|------------------|---|---|---|
| 0.83337816440333 | 0.30464939372933 | 0.19456538925300 | T | T | T |
| 0.83337816440333 | 0.63798272706267 | 0.19456538925300 | T | T | T |
| 0.83337816440333 | 0.97131606039600 | 0.19456538925300 | T | T | T |
| 0.16670797063700 | 0.19342443989567 | 0.19302485526400 | T | T | T |
| 0.16670797063700 | 0.52675777322900 | 0.19302485526400 | T | T | T |
| 0.16670797063700 | 0.86009110656233 | 0.19302485526400 | T | T | T |
| 0.50004130397033 | 0.19342443989567 | 0.19302485526400 | T | T | T |
| 0.50004130397033 | 0.52675777322900 | 0.19302485526400 | T | T | T |
| 0.50004130397033 | 0.86009110656233 | 0.19302485526400 | T | T | T |
| 0.83337463730367 | 0.19342443989567 | 0.19302485526400 | T | T | T |
| 0.83337463730367 | 0.52675777322900 | 0.19302485526400 | T | T | T |
| 0.83337463730367 | 0.86009110656233 | 0.19302485526400 | T | T | T |
| 0.08360185565567 | 0.08304726671033 | 0.19474066321800 | T | T | T |
| 0.08360185565567 | 0.41638060004367 | 0.19474066321800 | T | T | T |
| 0.08360185565567 | 0.74971393337700 | 0.19474066321800 | T | T | T |
| 0.41693518898900 | 0.08304726671033 | 0.19474066321800 | T | T | T |
| 0.41693518898900 | 0.41638060004367 | 0.19474066321800 | T | T | T |
| 0.41693518898900 | 0.74971393337700 | 0.19474066321800 | T | T | T |
| 0.75026852232233 | 0.08304726671033 | 0.19474066321800 | T | T | T |
| 0.75026852232233 | 0.41638060004367 | 0.19474066321800 | T | T | T |
| 0.75026852232233 | 0.74971393337700 | 0.19474066321800 | T | T | T |
| 0.08339396384467 | 0.30445345578667 | 0.19446551007100 | T | T | T |
| 0.08339396384467 | 0.63778678912000 | 0.19446551007100 | T | T | T |
| 0.08339396384467 | 0.97112012245333 | 0.19446551007100 | T | T | T |
| 0.41672729717800 | 0.30445345578667 | 0.19446551007100 | T | T | T |
| 0.41672729717800 | 0.63778678912000 | 0.19446551007100 | T | T | T |
| 0.41672729717800 | 0.97112012245333 | 0.19446551007100 | T | T | T |
| 0.75006063051133 | 0.30445345578667 | 0.19446551007100 | T | T | T |
| 0.75006063051133 | 0.63778678912000 | 0.19446551007100 | T | T | T |
| 0.75006063051133 | 0.97112012245333 | 0.19446551007100 | T | T | T |



|                  |                  |                  |   |   |   |
|------------------|------------------|------------------|---|---|---|
| 0.08329905138933 | 0.19371499200833 | 0.19431012471900 | T | T | T |
| 0.08329905138933 | 0.52704832534167 | 0.19431012471900 | T | T | T |
| 0.08329905138933 | 0.86038165867500 | 0.19431012471900 | T | T | T |
| 0.41663238472267 | 0.19371499200833 | 0.19431012471900 | T | T | T |
| 0.41663238472267 | 0.52704832534167 | 0.19431012471900 | T | T | T |
| 0.41663238472267 | 0.86038165867500 | 0.19431012471900 | T | T | T |
| 0.74996571805600 | 0.19371499200833 | 0.19431012471900 | T | T | T |
| 0.74996571805600 | 0.52704832534167 | 0.19431012471900 | T | T | T |
| 0.74996571805600 | 0.86038165867500 | 0.19431012471900 | T | T | T |
| 0.25025484740267 | 0.08309947031133 | 0.19473574935400 | T | T | T |
| 0.25025484740267 | 0.41643280364467 | 0.19473574935400 | T | T | T |
| 0.25025484740267 | 0.74976613697800 | 0.19473574935400 | T | T | T |
| 0.58358818073600 | 0.08309947031133 | 0.19473574935400 | T | T | T |
| 0.58358818073600 | 0.41643280364467 | 0.19473574935400 | T | T | T |
| 0.58358818073600 | 0.74976613697800 | 0.19473574935400 | T | T | T |
| 0.91692151406933 | 0.08309947031133 | 0.19473574935400 | T | T | T |
| 0.91692151406933 | 0.41643280364467 | 0.19473574935400 | T | T | T |
| 0.91692151406933 | 0.74976613697800 | 0.19473574935400 | T | T | T |
| 0.24995869632433 | 0.30449100985367 | 0.19447846461900 | T | T | T |
| 0.24995869632433 | 0.63782434318700 | 0.19447846461900 | T | T | T |
| 0.24995869632433 | 0.97115767652033 | 0.19447846461900 | T | T | T |
| 0.58329202965767 | 0.30449100985367 | 0.19447846461900 | T | T | T |
| 0.58329202965767 | 0.63782434318700 | 0.19447846461900 | T | T | T |
| 0.58329202965767 | 0.97115767652033 | 0.19447846461900 | T | T | T |
| 0.91662536299100 | 0.30449100985367 | 0.19447846461900 | T | T | T |
| 0.91662536299100 | 0.63782434318700 | 0.19447846461900 | T | T | T |
| 0.91662536299100 | 0.97115767652033 | 0.19447846461900 | T | T | T |
| 0.24995619527500 | 0.19367524456100 | 0.19432001106700 | T | T | T |
| 0.24995619527500 | 0.52700857789433 | 0.19432001106700 | T | T | T |
| 0.24995619527500 | 0.86034191122767 | 0.19432001106700 | T | T | T |

|                  |                  |                  |   |   |   |
|------------------|------------------|------------------|---|---|---|
| 0.58328952860833 | 0.19367524456100 | 0.19432001106700 | T | T | T |
| 0.58328952860833 | 0.52700857789433 | 0.19432001106700 | T | T | T |
| 0.58328952860833 | 0.86034191122767 | 0.19432001106700 | T | T | T |
| 0.91662286194167 | 0.19367524456100 | 0.19432001106700 | T | T | T |
| 0.91662286194167 | 0.52700857789433 | 0.19432001106700 | T | T | T |
| 0.91662286194167 | 0.86034191122767 | 0.19432001106700 | T | T | T |
| 0.12536645541700 | 0.03033557502940 | 0.26522570796300 | T | T | T |
| 0.12536645541700 | 0.36366890836273 | 0.26522570796300 | T | T | T |
| 0.12536645541700 | 0.69700224169607 | 0.26522570796300 | T | T | T |
| 0.45869978875033 | 0.03033557502940 | 0.26522570796300 | T | T | T |
| 0.45869978875033 | 0.36366890836273 | 0.26522570796300 | T | T | T |
| 0.45869978875033 | 0.69700224169607 | 0.26522570796300 | T | T | T |
| 0.79203312208367 | 0.03033557502940 | 0.26522570796300 | T | T | T |
| 0.79203312208367 | 0.36366890836273 | 0.26522570796300 | T | T | T |
| 0.79203312208367 | 0.69700224169607 | 0.26522570796300 | T | T | T |
| 0.12443721595133 | 0.25109894060867 | 0.26457902470200 | T | T | T |
| 0.12443721595133 | 0.58443227394200 | 0.26457902470200 | T | T | T |
| 0.12443721595133 | 0.91776560727533 | 0.26457902470200 | T | T | T |
| 0.45777054928467 | 0.25109894060867 | 0.26457902470200 | T | T | T |
| 0.45777054928467 | 0.58443227394200 | 0.26457902470200 | T | T | T |
| 0.45777054928467 | 0.91776560727533 | 0.26457902470200 | T | T | T |
| 0.79110388261800 | 0.25109894060867 | 0.26457902470200 | T | T | T |
| 0.79110388261800 | 0.58443227394200 | 0.26457902470200 | T | T | T |
| 0.79110388261800 | 0.91776560727533 | 0.26457902470200 | T | T | T |
| 0.12608050358233 | 0.14155355543933 | 0.26513849170700 | T | T | T |
| 0.12608050358233 | 0.47488688877267 | 0.26513849170700 | T | T | T |
| 0.12608050358233 | 0.80822022210600 | 0.26513849170700 | T | T | T |
| 0.45941383691567 | 0.14155355543933 | 0.26513849170700 | T | T | T |
| 0.45941383691567 | 0.47488688877267 | 0.26513849170700 | T | T | T |
| 0.45941383691567 | 0.80822022210600 | 0.26513849170700 | T | T | T |

|                  |                  |                  |   |   |   |
|------------------|------------------|------------------|---|---|---|
| 0.79274717024900 | 0.14155355543933 | 0.26513849170700 | T | T | T |
| 0.79274717024900 | 0.47488688877267 | 0.26513849170700 | T | T | T |
| 0.79274717024900 | 0.80822022210600 | 0.26513849170700 | T | T | T |
| 0.29205350363933 | 0.03036554404100 | 0.26520489972100 | T | T | T |
| 0.29205350363933 | 0.36369887737433 | 0.26520489972100 | T | T | T |
| 0.29205350363933 | 0.69703221070767 | 0.26520489972100 | T | T | T |
| 0.62538683697267 | 0.03036554404100 | 0.26520489972100 | T | T | T |
| 0.62538683697267 | 0.36369887737433 | 0.26520489972100 | T | T | T |
| 0.62538683697267 | 0.69703221070767 | 0.26520489972100 | T | T | T |
| 0.95872017030600 | 0.03036554404100 | 0.26520489972100 | T | T | T |
| 0.95872017030600 | 0.36369887737433 | 0.26520489972100 | T | T | T |
| 0.95872017030600 | 0.69703221070767 | 0.26520489972100 | T | T | T |
| 0.29111592152667 | 0.25306036974000 | 0.26617576933600 | T | T | T |
| 0.29111592152667 | 0.58639370307333 | 0.26617576933600 | T | T | T |
| 0.29111592152667 | 0.91972703640667 | 0.26617576933600 | T | T | T |
| 0.62444925486000 | 0.25306036974000 | 0.26617576933600 | T | T | T |
| 0.62444925486000 | 0.58639370307333 | 0.26617576933600 | T | T | T |
| 0.62444925486000 | 0.91972703640667 | 0.26617576933600 | T | T | T |
| 0.95778258819333 | 0.25306036974000 | 0.26617576933600 | T | T | T |
| 0.95778258819333 | 0.58639370307333 | 0.26617576933600 | T | T | T |
| 0.95778258819333 | 0.91972703640667 | 0.26617576933600 | T | T | T |
| 0.29272406777500 | 0.14259782340100 | 0.26620024944200 | T | T | T |
| 0.29272406777500 | 0.47593115673433 | 0.26620024944200 | T | T | T |
| 0.29272406777500 | 0.80926449006767 | 0.26620024944200 | T | T | T |
| 0.62605740110833 | 0.14259782340100 | 0.26620024944200 | T | T | T |
| 0.62605740110833 | 0.47593115673433 | 0.26620024944200 | T | T | T |
| 0.62605740110833 | 0.80926449006767 | 0.26620024944200 | T | T | T |
| 0.95939073444167 | 0.14259782340100 | 0.26620024944200 | T | T | T |
| 0.95939073444167 | 0.47593115673433 | 0.26620024944200 | T | T | T |
| 0.95939073444167 | 0.80926449006767 | 0.26620024944200 | T | T | T |

|                  |                  |                  |   |   |   |
|------------------|------------------|------------------|---|---|---|
| 0.04206003012233 | 0.03067356169533 | 0.26542587164400 | T | T | T |
| 0.04206003012233 | 0.36400689502867 | 0.26542587164400 | T | T | T |
| 0.04206003012233 | 0.69734022836200 | 0.26542587164400 | T | T | T |
| 0.37539336345567 | 0.03067356169533 | 0.26542587164400 | T | T | T |
| 0.37539336345567 | 0.36400689502867 | 0.26542587164400 | T | T | T |
| 0.37539336345567 | 0.69734022836200 | 0.26542587164400 | T | T | T |
| 0.70872669678900 | 0.03067356169533 | 0.26542587164400 | T | T | T |
| 0.70872669678900 | 0.36400689502867 | 0.26542587164400 | T | T | T |
| 0.70872669678900 | 0.69734022836200 | 0.26542587164400 | T | T | T |
| 0.04067485679900 | 0.25313839971333 | 0.26614415228300 | T | T | T |
| 0.04067485679900 | 0.58647173304667 | 0.26614415228300 | T | T | T |
| 0.04067485679900 | 0.91980506638000 | 0.26614415228300 | T | T | T |
| 0.37400819013233 | 0.25313839971333 | 0.26614415228300 | T | T | T |
| 0.37400819013233 | 0.58647173304667 | 0.26614415228300 | T | T | T |
| 0.37400819013233 | 0.91980506638000 | 0.26614415228300 | T | T | T |
| 0.70734152346567 | 0.25313839971333 | 0.26614415228300 | T | T | T |
| 0.70734152346567 | 0.58647173304667 | 0.26614415228300 | T | T | T |
| 0.70734152346567 | 0.91980506638000 | 0.26614415228300 | T | T | T |
| 0.04220017898700 | 0.14262338770767 | 0.26618257599400 | T | T | T |
| 0.04220017898700 | 0.47595672104100 | 0.26618257599400 | T | T | T |
| 0.04220017898700 | 0.80929005437433 | 0.26618257599400 | T | T | T |
| 0.37553351232033 | 0.14262338770767 | 0.26618257599400 | T | T | T |
| 0.37553351232033 | 0.47595672104100 | 0.26618257599400 | T | T | T |
| 0.37553351232033 | 0.80929005437433 | 0.26618257599400 | T | T | T |
| 0.70886684565367 | 0.14262338770767 | 0.26618257599400 | T | T | T |
| 0.70886684565367 | 0.47595672104100 | 0.26618257599400 | T | T | T |
| 0.70886684565367 | 0.80929005437433 | 0.26618257599400 | T | T | T |
| 0.20875855361933 | 0.03061235191710 | 0.26553300920200 | T | T | T |
| 0.20875855361933 | 0.36394568525043 | 0.26553300920200 | T | T | T |
| 0.20875855361933 | 0.69727901858377 | 0.26553300920200 | T | T | T |

|                  |                  |                  |   |   |   |
|------------------|------------------|------------------|---|---|---|
| 0.54209188695267 | 0.03061235191710 | 0.26553300920200 | T | T | T |
| 0.54209188695267 | 0.36394568525043 | 0.26553300920200 | T | T | T |
| 0.54209188695267 | 0.69727901858377 | 0.26553300920200 | T | T | T |
| 0.87542522028600 | 0.03061235191710 | 0.26553300920200 | T | T | T |
| 0.87542522028600 | 0.36394568525043 | 0.26553300920200 | T | T | T |
| 0.87542522028600 | 0.69727901858377 | 0.26553300920200 | T | T | T |
| 0.20738355253467 | 0.25130496140633 | 0.26511238355300 | T | T | T |
| 0.20738355253467 | 0.58463829473967 | 0.26511238355300 | T | T | T |
| 0.20738355253467 | 0.91797162807300 | 0.26511238355300 | T | T | T |
| 0.54071688586800 | 0.25130496140633 | 0.26511238355300 | T | T | T |
| 0.54071688586800 | 0.58463829473967 | 0.26511238355300 | T | T | T |
| 0.54071688586800 | 0.91797162807300 | 0.26511238355300 | T | T | T |
| 0.87405021920133 | 0.25130496140633 | 0.26511238355300 | T | T | T |
| 0.87405021920133 | 0.58463829473967 | 0.26511238355300 | T | T | T |
| 0.87405021920133 | 0.91797162807300 | 0.26511238355300 | T | T | T |
| 0.20878254370533 | 0.14155871664167 | 0.26505898286400 | T | T | T |
| 0.20878254370533 | 0.47489204997500 | 0.26505898286400 | T | T | T |
| 0.20878254370533 | 0.80822538330833 | 0.26505898286400 | T | T | T |
| 0.54211587703867 | 0.14155871664167 | 0.26505898286400 | T | T | T |
| 0.54211587703867 | 0.47489204997500 | 0.26505898286400 | T | T | T |
| 0.54211587703867 | 0.80822538330833 | 0.26505898286400 | T | T | T |
| 0.87544921037200 | 0.14155871664167 | 0.26505898286400 | T | T | T |
| 0.87544921037200 | 0.47489204997500 | 0.26505898286400 | T | T | T |
| 0.87544921037200 | 0.80822538330833 | 0.26505898286400 | T | T | T |
| 0.19669182360933 | 0.22434375819167 | 0.37780238773900 | T | T | T |
| 0.19669182360933 | 0.55767709152500 | 0.37780238773900 | T | T | T |
| 0.19669182360933 | 0.89101042485833 | 0.37780238773900 | T | T | T |
| 0.53002515694267 | 0.22434375819167 | 0.37780238773900 | T | T | T |
| 0.53002515694267 | 0.55767709152500 | 0.37780238773900 | T | T | T |
| 0.53002515694267 | 0.89101042485833 | 0.37780238773900 | T | T | T |

|                  |                  |                  |   |   |   |
|------------------|------------------|------------------|---|---|---|
| 0.86335849027600 | 0.22434375819167 | 0.37780238773900 | T | T | T |
| 0.86335849027600 | 0.55767709152500 | 0.37780238773900 | T | T | T |
| 0.86335849027600 | 0.89101042485833 | 0.37780238773900 | T | T | T |
| 0.22817143312767 | 0.24173116026967 | 0.33799293276900 | T | T | T |
| 0.22817143312767 | 0.57506449360300 | 0.33799293276900 | T | T | T |
| 0.22817143312767 | 0.90839782693633 | 0.33799293276900 | T | T | T |
| 0.56150476646100 | 0.24173116026967 | 0.33799293276900 | T | T | T |
| 0.56150476646100 | 0.57506449360300 | 0.33799293276900 | T | T | T |
| 0.56150476646100 | 0.90839782693633 | 0.33799293276900 | T | T | T |
| 0.89483809979433 | 0.24173116026967 | 0.33799293276900 | T | T | T |
| 0.89483809979433 | 0.57506449360300 | 0.33799293276900 | T | T | T |
| 0.89483809979433 | 0.90839782693633 | 0.33799293276900 | T | T | T |
| 0.16705781065800 | 0.24152948141700 | 0.36545972070600 | T | T | T |
| 0.16705781065800 | 0.57486281475033 | 0.36545972070600 | T | T | T |
| 0.16705781065800 | 0.90819614808367 | 0.36545972070600 | T | T | T |
| 0.50039114399133 | 0.24152948141700 | 0.36545972070600 | T | T | T |
| 0.50039114399133 | 0.57486281475033 | 0.36545972070600 | T | T | T |
| 0.50039114399133 | 0.90819614808367 | 0.36545972070600 | T | T | T |
| 0.83372447732467 | 0.24152948141700 | 0.36545972070600 | T | T | T |
| 0.83372447732467 | 0.57486281475033 | 0.36545972070600 | T | T | T |
| 0.83372447732467 | 0.90819614808367 | 0.36545972070600 | T | T | T |
| 0.17073063684167 | 0.20791992890100 | 0.35346177862500 | T | T | T |
| 0.17073063684167 | 0.54125326223433 | 0.35346177862500 | T | T | T |
| 0.17073063684167 | 0.87458659556767 | 0.35346177862500 | T | T | T |
| 0.50406397017500 | 0.20791992890100 | 0.35346177862500 | T | T | T |
| 0.50406397017500 | 0.54125326223433 | 0.35346177862500 | T | T | T |
| 0.50406397017500 | 0.87458659556767 | 0.35346177862500 | T | T | T |
| 0.83739730350833 | 0.20791992890100 | 0.35346177862500 | T | T | T |
| 0.83739730350833 | 0.54125326223433 | 0.35346177862500 | T | T | T |
| 0.83739730350833 | 0.87458659556767 | 0.35346177862500 | T | T | T |

|                  |                  |                  |   |   |   |
|------------------|------------------|------------------|---|---|---|
| 0.17756417934800 | 0.27063951669000 | 0.32859735321900 | T | T | T |
| 0.17756417934800 | 0.60397285002333 | 0.32859735321900 | T | T | T |
| 0.17756417934800 | 0.93730618335667 | 0.32859735321900 | T | T | T |
| 0.51089751268133 | 0.27063951669000 | 0.32859735321900 | T | T | T |
| 0.51089751268133 | 0.60397285002333 | 0.32859735321900 | T | T | T |
| 0.51089751268133 | 0.93730618335667 | 0.32859735321900 | T | T | T |
| 0.84423084601467 | 0.27063951669000 | 0.32859735321900 | T | T | T |
| 0.84423084601467 | 0.60397285002333 | 0.32859735321900 | T | T | T |
| 0.84423084601467 | 0.93730618335667 | 0.32859735321900 | T | T | T |
| 0.14471378123767 | 0.26562558770433 | 0.32754136651400 | T | T | T |
| 0.14471378123767 | 0.59895892103767 | 0.32754136651400 | T | T | T |
| 0.14471378123767 | 0.93229225437100 | 0.32754136651400 | T | T | T |
| 0.47804711457100 | 0.26562558770433 | 0.32754136651400 | T | T | T |
| 0.47804711457100 | 0.59895892103767 | 0.32754136651400 | T | T | T |
| 0.47804711457100 | 0.93229225437100 | 0.32754136651400 | T | T | T |
| 0.81138044790433 | 0.26562558770433 | 0.32754136651400 | T | T | T |
| 0.81138044790433 | 0.59895892103767 | 0.32754136651400 | T | T | T |
| 0.81138044790433 | 0.93229225437100 | 0.32754136651400 | T | T | T |
| 0.24148386125600 | 0.24116582169567 | 0.38597859317400 | T | T | T |
| 0.24148386125600 | 0.57449915502900 | 0.38597859317400 | T | T | T |
| 0.24148386125600 | 0.90783248836233 | 0.38597859317400 | T | T | T |
| 0.57481719458933 | 0.24116582169567 | 0.38597859317400 | T | T | T |
| 0.57481719458933 | 0.57449915502900 | 0.38597859317400 | T | T | T |
| 0.57481719458933 | 0.90783248836233 | 0.38597859317400 | T | T | T |
| 0.90815052792267 | 0.24116582169567 | 0.38597859317400 | T | T | T |
| 0.90815052792267 | 0.57449915502900 | 0.38597859317400 | T | T | T |
| 0.90815052792267 | 0.90783248836233 | 0.38597859317400 | T | T | T |
| 0.15019895084400 | 0.17843542874033 | 0.30231290598400 | T | T | T |
| 0.15019895084400 | 0.51176876207367 | 0.30231290598400 | T | T | T |
| 0.15019895084400 | 0.84510209540700 | 0.30231290598400 | T | T | T |

|                  |                  |                  |   |   |   |
|------------------|------------------|------------------|---|---|---|
| 0.48353228417733 | 0.17843542874033 | 0.30231290598400 | T | T | T |
| 0.48353228417733 | 0.51176876207367 | 0.30231290598400 | T | T | T |
| 0.48353228417733 | 0.84510209540700 | 0.30231290598400 | T | T | T |
| 0.81686561751067 | 0.17843542874033 | 0.30231290598400 | T | T | T |
| 0.81686561751067 | 0.51176876207367 | 0.30231290598400 | T | T | T |
| 0.81686561751067 | 0.84510209540700 | 0.30231290598400 | T | T | T |
| 0.18361482619833 | 0.17842784039467 | 0.30053433634000 | T | T | T |
| 0.18361482619833 | 0.51176117372800 | 0.30053433634000 | T | T | T |
| 0.18361482619833 | 0.84509450706133 | 0.30053433634000 | T | T | T |
| 0.51694815953167 | 0.17842784039467 | 0.30053433634000 | T | T | T |
| 0.51694815953167 | 0.51176117372800 | 0.30053433634000 | T | T | T |
| 0.51694815953167 | 0.84509450706133 | 0.30053433634000 | T | T | T |
| 0.85028149286500 | 0.17842784039467 | 0.30053433634000 | T | T | T |
| 0.85028149286500 | 0.51176117372800 | 0.30053433634000 | T | T | T |
| 0.85028149286500 | 0.84509450706133 | 0.30053433634000 | T | T | T |
| 0.19879006229333 | 0.22376455754367 | 0.88859157886100 | T | T | T |
| 0.19879006229333 | 0.55709789087700 | 0.88859157886100 | T | T | T |
| 0.19879006229333 | 0.89043122421033 | 0.88859157886100 | T | T | T |
| 0.53212339562667 | 0.22376455754367 | 0.88859157886100 | T | T | T |
| 0.53212339562667 | 0.55709789087700 | 0.88859157886100 | T | T | T |
| 0.53212339562667 | 0.89043122421033 | 0.88859157886100 | T | T | T |
| 0.86545672896000 | 0.22376455754367 | 0.88859157886100 | T | T | T |
| 0.86545672896000 | 0.55709789087700 | 0.88859157886100 | T | T | T |
| 0.86545672896000 | 0.89043122421033 | 0.88859157886100 | T | T | T |
| 0.22956738879200 | 0.24022766958633 | 0.92963365889300 | T | T | T |
| 0.22956738879200 | 0.57356100291967 | 0.92963365889300 | T | T | T |
| 0.22956738879200 | 0.90689433625300 | 0.92963365889300 | T | T | T |
| 0.56290072212533 | 0.24022766958633 | 0.92963365889300 | T | T | T |
| 0.56290072212533 | 0.57356100291967 | 0.92963365889300 | T | T | T |
| 0.56290072212533 | 0.90689433625300 | 0.92963365889300 | T | T | T |



|                  |                  |                  |   |   |   |
|------------------|------------------|------------------|---|---|---|
| 0.89623405545867 | 0.24022766958633 | 0.92963365889300 | T | T | T |
| 0.89623405545867 | 0.57356100291967 | 0.92963365889300 | T | T | T |
| 0.89623405545867 | 0.90689433625300 | 0.92963365889300 | T | T | T |
| 0.16946382784033 | 0.24208430187067 | 0.89988818425300 | T | T | T |
| 0.16946382784033 | 0.57541763520400 | 0.89988818425300 | T | T | T |
| 0.16946382784033 | 0.90875096853733 | 0.89988818425300 | T | T | T |
| 0.50279716117367 | 0.24208430187067 | 0.89988818425300 | T | T | T |
| 0.50279716117367 | 0.57541763520400 | 0.89988818425300 | T | T | T |
| 0.50279716117367 | 0.90875096853733 | 0.89988818425300 | T | T | T |
| 0.83613049450700 | 0.24208430187067 | 0.89988818425300 | T | T | T |
| 0.83613049450700 | 0.57541763520400 | 0.89988818425300 | T | T | T |
| 0.83613049450700 | 0.90875096853733 | 0.89988818425300 | T | T | T |
| 0.17160275448533 | 0.20817082516167 | 0.91105105881200 | T | T | T |
| 0.17160275448533 | 0.54150415849500 | 0.91105105881200 | T | T | T |
| 0.17160275448533 | 0.87483749182833 | 0.91105105881200 | T | T | T |
| 0.50493608781867 | 0.20817082516167 | 0.91105105881200 | T | T | T |
| 0.50493608781867 | 0.54150415849500 | 0.91105105881200 | T | T | T |
| 0.50493608781867 | 0.87483749182833 | 0.91105105881200 | T | T | T |
| 0.83826942115200 | 0.20817082516167 | 0.91105105881200 | T | T | T |
| 0.83826942115200 | 0.54150415849500 | 0.91105105881200 | T | T | T |
| 0.83826942115200 | 0.87483749182833 | 0.91105105881200 | T | T | T |
| 0.17991740106267 | 0.26987214195600 | 0.93848295318700 | T | T | T |
| 0.17991740106267 | 0.60320547528933 | 0.93848295318700 | T | T | T |
| 0.17991740106267 | 0.93653880862267 | 0.93848295318700 | T | T | T |
| 0.51325073439600 | 0.26987214195600 | 0.93848295318700 | T | T | T |
| 0.51325073439600 | 0.60320547528933 | 0.93848295318700 | T | T | T |
| 0.51325073439600 | 0.93653880862267 | 0.93848295318700 | T | T | T |
| 0.84658406772933 | 0.26987214195600 | 0.93848295318700 | T | T | T |
| 0.84658406772933 | 0.60320547528933 | 0.93848295318700 | T | T | T |
| 0.84658406772933 | 0.93653880862267 | 0.93848295318700 | T | T | T |

|                  |                  |                  |   |   |   |
|------------------|------------------|------------------|---|---|---|
| 0.14681933771533 | 0.26601204318433 | 0.93693081890200 | T | T | T |
| 0.14681933771533 | 0.59934537651767 | 0.93693081890200 | T | T | T |
| 0.14681933771533 | 0.93267870985100 | 0.93693081890200 | T | T | T |
| 0.48015267104867 | 0.26601204318433 | 0.93693081890200 | T | T | T |
| 0.48015267104867 | 0.59934537651767 | 0.93693081890200 | T | T | T |
| 0.48015267104867 | 0.93267870985100 | 0.93693081890200 | T | T | T |
| 0.81348600438200 | 0.26601204318433 | 0.93693081890200 | T | T | T |
| 0.81348600438200 | 0.59934537651767 | 0.93693081890200 | T | T | T |
| 0.81348600438200 | 0.93267870985100 | 0.93693081890200 | T | T | T |
| 0.24475484682567 | 0.23838137949700 | 0.88315017923400 | T | T | T |
| 0.24475484682567 | 0.57171471283033 | 0.88315017923400 | T | T | T |
| 0.24475484682567 | 0.90504804616367 | 0.88315017923400 | T | T | T |
| 0.57808818015900 | 0.23838137949700 | 0.88315017923400 | T | T | T |
| 0.57808818015900 | 0.57171471283033 | 0.88315017923400 | T | T | T |
| 0.57808818015900 | 0.90504804616367 | 0.88315017923400 | T | T | T |
| 0.91142151349233 | 0.23838137949700 | 0.88315017923400 | T | T | T |
| 0.91142151349233 | 0.57171471283033 | 0.88315017923400 | T | T | T |
| 0.91142151349233 | 0.90504804616367 | 0.88315017923400 | T | T | T |
| 0.14927262250467 | 0.17889084256833 | 0.96088812285000 | T | T | T |
| 0.14927262250467 | 0.51222417590167 | 0.96088812285000 | T | T | T |
| 0.14927262250467 | 0.84555750923500 | 0.96088812285000 | T | T | T |
| 0.48260595583800 | 0.17889084256833 | 0.96088812285000 | T | T | T |
| 0.48260595583800 | 0.51222417590167 | 0.96088812285000 | T | T | T |
| 0.48260595583800 | 0.84555750923500 | 0.96088812285000 | T | T | T |
| 0.81593928917133 | 0.17889084256833 | 0.96088812285000 | T | T | T |
| 0.81593928917133 | 0.51222417590167 | 0.96088812285000 | T | T | T |
| 0.81593928917133 | 0.84555750923500 | 0.96088812285000 | T | T | T |
| 0.18267782559300 | 0.17817997953500 | 0.96345845387500 | T | T | T |
| 0.18267782559300 | 0.51151331286833 | 0.96345845387500 | T | T | T |
| 0.18267782559300 | 0.84484664620167 | 0.96345845387500 | T | T | T |

|                  |                  |                  |   |   |   |
|------------------|------------------|------------------|---|---|---|
| 0.51601115892633 | 0.17817997953500 | 0.96345845387500 | T | T | T |
| 0.51601115892633 | 0.51151331286833 | 0.96345845387500 | T | T | T |
| 0.51601115892633 | 0.84484664620167 | 0.96345845387500 | T | T | T |
| 0.84934449225967 | 0.17817997953500 | 0.96345845387500 | T | T | T |
| 0.84934449225967 | 0.51151331286833 | 0.96345845387500 | T | T | T |
| 0.84934449225967 | 0.84484664620167 | 0.96345845387500 | T | T | T |
| 0.22812048097667 | 0.23188756167400 | 0.36645835791900 | T | T | T |
| 0.22812048097667 | 0.56522089500733 | 0.36645835791900 | T | T | T |
| 0.22812048097667 | 0.89855422834067 | 0.36645835791900 | T | T | T |
| 0.56145381431000 | 0.23188756167400 | 0.36645835791900 | T | T | T |
| 0.56145381431000 | 0.56522089500733 | 0.36645835791900 | T | T | T |
| 0.56145381431000 | 0.89855422834067 | 0.36645835791900 | T | T | T |
| 0.89478714764333 | 0.23188756167400 | 0.36645835791900 | T | T | T |
| 0.89478714764333 | 0.56522089500733 | 0.36645835791900 | T | T | T |
| 0.89478714764333 | 0.89855422834067 | 0.36645835791900 | T | T | T |
| 0.17477931009633 | 0.22188730248567 | 0.37722715515400 | T | T | T |
| 0.17477931009633 | 0.55522063581900 | 0.37722715515400 | T | T | T |
| 0.17477931009633 | 0.88855396915233 | 0.37722715515400 | T | T | T |
| 0.50811264342967 | 0.22188730248567 | 0.37722715515400 | T | T | T |
| 0.50811264342967 | 0.55522063581900 | 0.37722715515400 | T | T | T |
| 0.50811264342967 | 0.88855396915233 | 0.37722715515400 | T | T | T |
| 0.84144597676300 | 0.22188730248567 | 0.37722715515400 | T | T | T |
| 0.84144597676300 | 0.55522063581900 | 0.37722715515400 | T | T | T |
| 0.84144597676300 | 0.88855396915233 | 0.37722715515400 | T | T | T |
| 0.16126317931100 | 0.26715167901400 | 0.34873269483500 | T | T | T |
| 0.16126317931100 | 0.60048501234733 | 0.34873269483500 | T | T | T |
| 0.16126317931100 | 0.93381834568067 | 0.34873269483500 | T | T | T |
| 0.49459651264433 | 0.26715167901400 | 0.34873269483500 | T | T | T |
| 0.49459651264433 | 0.60048501234733 | 0.34873269483500 | T | T | T |
| 0.49459651264433 | 0.93381834568067 | 0.34873269483500 | T | T | T |

|                  |                  |                  |   |   |   |
|------------------|------------------|------------------|---|---|---|
| 0.82792984597767 | 0.26715167901400 | 0.34873269483500 | T | T | T |
| 0.82792984597767 | 0.60048501234733 | 0.34873269483500 | T | T | T |
| 0.82792984597767 | 0.93381834568067 | 0.34873269483500 | T | T | T |
| 0.16704270475733 | 0.19056994470200 | 0.30744078254100 | T | T | T |
| 0.16704270475733 | 0.52390327803533 | 0.30744078254100 | T | T | T |
| 0.16704270475733 | 0.85723661136867 | 0.30744078254100 | T | T | T |
| 0.50037603809067 | 0.19056994470200 | 0.30744078254100 | T | T | T |
| 0.50037603809067 | 0.52390327803533 | 0.30744078254100 | T | T | T |
| 0.50037603809067 | 0.85723661136867 | 0.30744078254100 | T | T | T |
| 0.83370937142400 | 0.19056994470200 | 0.30744078254100 | T | T | T |
| 0.83370937142400 | 0.52390327803533 | 0.30744078254100 | T | T | T |
| 0.83370937142400 | 0.85723661136867 | 0.30744078254100 | T | T | T |
| 0.23035052143467 | 0.22977917114633 | 0.90171788879500 | T | T | T |
| 0.23035052143467 | 0.56311250447967 | 0.90171788879500 | T | T | T |
| 0.23035052143467 | 0.89644583781300 | 0.90171788879500 | T | T | T |
| 0.56368385476800 | 0.22977917114633 | 0.90171788879500 | T | T | T |
| 0.56368385476800 | 0.56311250447967 | 0.90171788879500 | T | T | T |
| 0.56368385476800 | 0.89644583781300 | 0.90171788879500 | T | T | T |
| 0.89701718810133 | 0.22977917114633 | 0.90171788879500 | T | T | T |
| 0.89701718810133 | 0.56311250447967 | 0.90171788879500 | T | T | T |
| 0.89701718810133 | 0.89644583781300 | 0.90171788879500 | T | T | T |
| 0.17678522946900 | 0.22218919882900 | 0.88790709101000 | T | T | T |
| 0.17678522946900 | 0.55552253216233 | 0.88790709101000 | T | T | T |
| 0.17678522946900 | 0.88885586549567 | 0.88790709101000 | T | T | T |
| 0.51011856280233 | 0.22218919882900 | 0.88790709101000 | T | T | T |
| 0.51011856280233 | 0.55552253216233 | 0.88790709101000 | T | T | T |
| 0.51011856280233 | 0.88885586549567 | 0.88790709101000 | T | T | T |
| 0.84345189613567 | 0.22218919882900 | 0.88790709101000 | T | T | T |
| 0.84345189613567 | 0.55552253216233 | 0.88790709101000 | T | T | T |
| 0.84345189613567 | 0.88885586549567 | 0.88790709101000 | T | T | T |

|                  |                  |                  |   |   |   |
|------------------|------------------|------------------|---|---|---|
| 0.16400599494300 | 0.26746981270600 | 0.91697459922400 | T | T | T |
| 0.16400599494300 | 0.60080314603933 | 0.91697459922400 | T | T | T |
| 0.16400599494300 | 0.93413647937267 | 0.91697459922400 | T | T | T |
| 0.49733932827633 | 0.26746981270600 | 0.91697459922400 | T | T | T |
| 0.49733932827633 | 0.60080314603933 | 0.91697459922400 | T | T | T |
| 0.49733932827633 | 0.93413647937267 | 0.91697459922400 | T | T | T |
| 0.83067266160967 | 0.26746981270600 | 0.91697459922400 | T | T | T |
| 0.83067266160967 | 0.60080314603933 | 0.91697459922400 | T | T | T |
| 0.83067266160967 | 0.93413647937267 | 0.91697459922400 | T | T | T |
| 0.16640308651767 | 0.19072587664300 | 0.95653295332600 | T | T | T |
| 0.16640308651767 | 0.52405920997633 | 0.95653295332600 | T | T | T |
| 0.16640308651767 | 0.85739254330967 | 0.95653295332600 | T | T | T |
| 0.49973641985100 | 0.19072587664300 | 0.95653295332600 | T | T | T |
| 0.49973641985100 | 0.52405920997633 | 0.95653295332600 | T | T | T |
| 0.49973641985100 | 0.85739254330967 | 0.95653295332600 | T | T | T |
| 0.83306975318433 | 0.19072587664300 | 0.95653295332600 | T | T | T |
| 0.83306975318433 | 0.52405920997633 | 0.95653295332600 | T | T | T |
| 0.83306975318433 | 0.85739254330967 | 0.95653295332600 | T | T | T |
| 0.21938609054000 | 0.11729761104133 | 0.39096725523600 | T | T | T |
| 0.21938609054000 | 0.45063094437467 | 0.39096725523600 | T | T | T |
| 0.21938609054000 | 0.78396427770800 | 0.39096725523600 | T | T | T |
| 0.55271942387333 | 0.11729761104133 | 0.39096725523600 | T | T | T |
| 0.55271942387333 | 0.45063094437467 | 0.39096725523600 | T | T | T |
| 0.55271942387333 | 0.78396427770800 | 0.39096725523600 | T | T | T |
| 0.88605275720667 | 0.11729761104133 | 0.39096725523600 | T | T | T |
| 0.88605275720667 | 0.45063094437467 | 0.39096725523600 | T | T | T |
| 0.88605275720667 | 0.78396427770800 | 0.39096725523600 | T | T | T |
| 0.22398143659500 | 0.11724529450833 | 0.88381404862400 | T | T | T |
| 0.22398143659500 | 0.45057862784167 | 0.88381404862400 | T | T | T |
| 0.22398143659500 | 0.78391196117500 | 0.88381404862400 | T | T | T |

|                  |                  |                  |   |   |   |
|------------------|------------------|------------------|---|---|---|
| 0.55731476992833 | 0.11724529450833 | 0.88381404862400 | T | T | T |
| 0.55731476992833 | 0.45057862784167 | 0.88381404862400 | T | T | T |
| 0.55731476992833 | 0.78391196117500 | 0.88381404862400 | T | T | T |
| 0.89064810326167 | 0.11724529450833 | 0.88381404862400 | T | T | T |
| 0.89064810326167 | 0.45057862784167 | 0.88381404862400 | T | T | T |
| 0.89064810326167 | 0.78391196117500 | 0.88381404862400 | T | T | T |
| 0.20547662518067 | 0.16283572218867 | 0.39412475003900 | T | T | T |
| 0.20547662518067 | 0.49616905552200 | 0.39412475003900 | T | T | T |
| 0.20547662518067 | 0.82950238885533 | 0.39412475003900 | T | T | T |
| 0.53880995851400 | 0.16283572218867 | 0.39412475003900 | T | T | T |
| 0.53880995851400 | 0.49616905552200 | 0.39412475003900 | T | T | T |
| 0.53880995851400 | 0.82950238885533 | 0.39412475003900 | T | T | T |
| 0.87214329184733 | 0.16283572218867 | 0.39412475003900 | T | T | T |
| 0.87214329184733 | 0.49616905552200 | 0.39412475003900 | T | T | T |
| 0.87214329184733 | 0.82950238885533 | 0.39412475003900 | T | T | T |
| 0.20555354980000 | 0.16114361184400 | 0.87642034181300 | T | T | T |
| 0.20555354980000 | 0.49447694517733 | 0.87642034181300 | T | T | T |
| 0.20555354980000 | 0.82781027851067 | 0.87642034181300 | T | T | T |
| 0.53888688313333 | 0.16114361184400 | 0.87642034181300 | T | T | T |
| 0.53888688313333 | 0.49447694517733 | 0.87642034181300 | T | T | T |
| 0.53888688313333 | 0.82781027851067 | 0.87642034181300 | T | T | T |
| 0.87222021646667 | 0.16114361184400 | 0.87642034181300 | T | T | T |
| 0.87222021646667 | 0.49447694517733 | 0.87642034181300 | T | T | T |
| 0.87222021646667 | 0.82781027851067 | 0.87642034181300 | T | T | T |
| 0.21248216458700 | 0.14005018031500 | 0.39236968004200 | T | T | T |
| 0.21248216458700 | 0.47338351364833 | 0.39236968004200 | T | T | T |
| 0.21248216458700 | 0.80671684698167 | 0.39236968004200 | T | T | T |
| 0.54581549792033 | 0.14005018031500 | 0.39236968004200 | T | T | T |
| 0.54581549792033 | 0.47338351364833 | 0.39236968004200 | T | T | T |
| 0.54581549792033 | 0.80671684698167 | 0.39236968004200 | T | T | T |

|                  |                  |                  |   |   |   |
|------------------|------------------|------------------|---|---|---|
| 0.87914883125367 | 0.14005018031500 | 0.39236968004200 | T | T | T |
| 0.87914883125367 | 0.47338351364833 | 0.39236968004200 | T | T | T |
| 0.87914883125367 | 0.80671684698167 | 0.39236968004200 | T | T | T |
| 0.21480706874967 | 0.13919705266633 | 0.88043234707800 | T | T | T |
| 0.21480706874967 | 0.47253038599967 | 0.88043234707800 | T | T | T |
| 0.21480706874967 | 0.80586371933300 | 0.88043234707800 | T | T | T |
| 0.54814040208300 | 0.13919705266633 | 0.88043234707800 | T | T | T |
| 0.54814040208300 | 0.47253038599967 | 0.88043234707800 | T | T | T |
| 0.54814040208300 | 0.80586371933300 | 0.88043234707800 | T | T | T |
| 0.88147373541633 | 0.13919705266633 | 0.88043234707800 | T | T | T |
| 0.88147373541633 | 0.47253038599967 | 0.88043234707800 | T | T | T |
| 0.88147373541633 | 0.80586371933300 | 0.88043234707800 | T | T | T |

#### 4) Large supercell FS

POSCAR

1

|                   |                   |                   |
|-------------------|-------------------|-------------------|
| 46.81727663803009 | 0.00000000000000  | 0.00000000000000  |
| 0.00000000000000  | 30.38811981783783 | 0.00000000000000  |
| 0.00000000000000  | 0.00000000000000  | 49.65722643411313 |

Ga P H O C

540 540 162 108 18

Direct

|                  |                  |                  |   |   |   |
|------------------|------------------|------------------|---|---|---|
| 0.00070906837992 | 0.01582205877480 | 0.00744406320172 | T | T | T |
| 0.00071564784574 | 0.01573318680060 | 0.34085365745600 | T | T | T |
| 0.00063912121291 | 0.01586485496460 | 0.67412000484200 | T | T | T |
| 0.33406953604100 | 0.01580282342410 | 0.00737408164406 | T | T | T |
| 0.33390023004500 | 0.01578198079400 | 0.34073918417700 | T | T | T |
| 0.33397093988700 | 0.01585987731510 | 0.67411833015400 | T | T | T |
| 0.66731283432000 | 0.01588151911980 | 0.00745449467564 | T | T | T |
| 0.66733374341400 | 0.01580285818360 | 0.34084740174000 | T | T | T |

|                  |                  |                  |   |   |   |
|------------------|------------------|------------------|---|---|---|
| 0.66730722553000 | 0.01586559838220 | 0.67412833419700 | T | T | T |
| 0.33238199744000 | 0.01560043617030 | 0.22996169657100 | T | T | T |
| 0.33247524157900 | 0.01585679963860 | 0.56332236893700 | T | T | T |
| 0.33247458360400 | 0.01583027957930 | 0.89665223349700 | T | T | T |
| 0.66578709958100 | 0.01582086710660 | 0.23000738192900 | T | T | T |
| 0.66581316816200 | 0.01584570833930 | 0.56332362399100 | T | T | T |
| 0.66581412566900 | 0.01585172857980 | 0.89665775939100 | T | T | T |
| 0.99919174773900 | 0.01579111012440 | 0.23001820455800 | T | T | T |
| 0.99914638401500 | 0.01586173780710 | 0.56331725586200 | T | T | T |
| 0.99914609221000 | 0.01583876780750 | 0.89664515547700 | T | T | T |
| 0.33432525703300 | 0.01577541706790 | 0.11787017190100 | T | T | T |
| 0.33245739340100 | 0.01573200103760 | 0.45148860258500 | T | T | T |
| 0.33246345163100 | 0.01572826025310 | 0.78481727172700 | T | T | T |
| 0.66582656785700 | 0.01573884415710 | 0.11812187428100 | T | T | T |
| 0.66580300127900 | 0.01575191196360 | 0.45150431719500 | T | T | T |
| 0.66580032530500 | 0.01575022067930 | 0.78482303495600 | T | T | T |
| 0.99913705011000 | 0.01564893093100 | 0.11808830625300 | T | T | T |
| 0.99913720641700 | 0.01575699648250 | 0.45148510056300 | T | T | T |
| 0.99913666458400 | 0.01575005266720 | 0.78482704234600 | T | T | T |
| 0.16721732260600 | 0.01561552181500 | 0.00905006534504 | T | T | T |
| 0.16735601609100 | 0.01573860149420 | 0.34061973139200 | T | T | T |
| 0.16729387704000 | 0.01576034396560 | 0.67564497865700 | T | T | T |
| 0.50065739840900 | 0.01578945221510 | 0.00897870097159 | T | T | T |
| 0.50063077462300 | 0.01577596044600 | 0.34233595625200 | T | T | T |
| 0.50063878032600 | 0.01578162337140 | 0.67566052664800 | T | T | T |
| 0.83398093320800 | 0.01580295160150 | 0.00900127547844 | T | T | T |
| 0.83398635419100 | 0.01577145212200 | 0.34233033977700 | T | T | T |
| 0.83397436705100 | 0.01578655214260 | 0.67566248935100 | T | T | T |
| 0.16549298438100 | 0.00855357680588 | 0.22406222610800 | T | T | T |
| 0.16562313768300 | 0.01531825216030 | 0.55925421543600 | T | T | T |



|                  |                  |                  |   |   |   |
|------------------|------------------|------------------|---|---|---|
| 0.16562365973400 | 0.01531369120900 | 0.89260281332000 | T | T | T |
| 0.49898736913000 | 0.01528937490740 | 0.22594036103700 | T | T | T |
| 0.49896148030900 | 0.01532320952560 | 0.55926417396300 | T | T | T |
| 0.49896270097400 | 0.01532698831320 | 0.89260371052300 | T | T | T |
| 0.83230344575200 | 0.01529984649390 | 0.22591647585300 | T | T | T |
| 0.83230235711300 | 0.01533231440360 | 0.55926812177800 | T | T | T |
| 0.83230353206300 | 0.01532749293560 | 0.89260530537400 | T | T | T |
| 0.16154282944400 | 0.99797096415100 | 0.10940980671700 | T | T | T |
| 0.16560052229500 | 0.01606807533440 | 0.45114648484600 | T | T | T |
| 0.16562126087400 | 0.01600150598700 | 0.78458364313900 | T | T | T |
| 0.49926653160400 | 0.01611318528450 | 0.11786339446200 | T | T | T |
| 0.49895895571000 | 0.01604033300180 | 0.45125603396700 | T | T | T |
| 0.49896383267000 | 0.01602206021870 | 0.78458225878800 | T | T | T |
| 0.83228310191800 | 0.01603615487420 | 0.11790654811400 | T | T | T |
| 0.83230055829400 | 0.01603538572650 | 0.45125648301700 | T | T | T |
| 0.83229847688000 | 0.01601511165120 | 0.78457970992700 | T | T | T |
| 0.08351407283040 | 0.01580152430360 | 0.00750485601550 | T | T | T |
| 0.08347046282970 | 0.01587310893910 | 0.34054133503800 | T | T | T |
| 0.08345264459100 | 0.01588650682600 | 0.67414393389400 | T | T | T |
| 0.41680196821700 | 0.01590978332930 | 0.00746248189689 | T | T | T |
| 0.41676777353900 | 0.01585595964630 | 0.34081443925400 | T | T | T |
| 0.41679366981600 | 0.01589659298000 | 0.67414680459700 | T | T | T |
| 0.75013453991900 | 0.01591414040090 | 0.00748533809679 | T | T | T |
| 0.75013125028300 | 0.01587972697030 | 0.34082120897100 | T | T | T |
| 0.75012793362000 | 0.01589950306130 | 0.67415012903100 | T | T | T |
| 0.08167521158720 | 0.01576353254200 | 0.22969404976300 | T | T | T |
| 0.08135583468260 | 0.01589464727830 | 0.56321811317300 | T | T | T |
| 0.08135717597620 | 0.01587151204650 | 0.89655663104000 | T | T | T |
| 0.41470986968200 | 0.01582361007940 | 0.22986317663900 | T | T | T |
| 0.41468995274700 | 0.01588619323300 | 0.56322936543700 | T | T | T |

|                  |                  |                  |   |   |   |
|------------------|------------------|------------------|---|---|---|
| 0.41469273044800 | 0.01587360975580 | 0.89657200476200 | T | T | T |
| 0.74803745917700 | 0.01583730421100 | 0.22987091401200 | T | T | T |
| 0.74803193541500 | 0.01588108641670 | 0.56322902732500 | T | T | T |
| 0.74803247146900 | 0.01587774876760 | 0.89656422229600 | T | T | T |
| 0.08196058680080 | 0.01540827718650 | 0.11967805280300 | T | T | T |
| 0.08157216572650 | 0.01574525290930 | 0.45133900303800 | T | T | T |
| 0.08153118198320 | 0.01568713384410 | 0.78482375240200 | T | T | T |
| 0.41637523636400 | 0.01576429097950 | 0.11809090289500 | T | T | T |
| 0.41485152349400 | 0.01569349335090 | 0.45148944742000 | T | T | T |
| 0.41486432335000 | 0.01567998748930 | 0.78480894323800 | T | T | T |
| 0.74821854465600 | 0.01569407259540 | 0.11811960156700 | T | T | T |
| 0.74820714169200 | 0.01569791615610 | 0.45149319540600 | T | T | T |
| 0.74820237690400 | 0.01568992047250 | 0.78480898105400 | T | T | T |
| 0.25015087967800 | 0.01582593852740 | 0.00746260886593 | T | T | T |
| 0.25018554827800 | 0.01592754313640 | 0.34064739011000 | T | T | T |
| 0.25027181604500 | 0.01591011416910 | 0.67422671434000 | T | T | T |
| 0.58360816496900 | 0.01594182102800 | 0.00757217419211 | T | T | T |
| 0.58359271130100 | 0.01587404373860 | 0.34097157615500 | T | T | T |
| 0.58360843243400 | 0.01592280437420 | 0.67424396082100 | T | T | T |
| 0.91695729511300 | 0.01592841608600 | 0.00757135077641 | T | T | T |
| 0.91694468220000 | 0.01582574646690 | 0.34100242221300 | T | T | T |
| 0.91694519649900 | 0.01593138016520 | 0.67423105887300 | T | T | T |
| 0.24981946340800 | 0.01536664878300 | 0.22802422882400 | T | T | T |
| 0.25026797633500 | 0.01898559563700 | 0.56313028656600 | T | T | T |
| 0.25026384370600 | 0.01894950396010 | 0.89645613949500 | T | T | T |
| 0.58363297172200 | 0.01893506363400 | 0.22982289009700 | T | T | T |
| 0.58360919864100 | 0.01896791398810 | 0.56312906161500 | T | T | T |
| 0.58360640900300 | 0.01898342598690 | 0.89647228890700 | T | T | T |
| 0.91699683045700 | 0.01892684598330 | 0.22981764565600 | T | T | T |
| 0.91694481961000 | 0.01899801815970 | 0.56314033137600 | T | T | T |

|                  |                  |                  |   |   |   |
|------------------|------------------|------------------|---|---|---|
| 0.91694695091000 | 0.01898724106470 | 0.89648246114100 | T | T | T |
| 0.25420836265200 | 0.01859378326080 | 0.11759261827500 | T | T | T |
| 0.25009599952400 | 0.01581770099090 | 0.45261296184600 | T | T | T |
| 0.25009333696400 | 0.01580951917230 | 0.78600474000200 | T | T | T |
| 0.58350722443400 | 0.01583044116650 | 0.11928276394800 | T | T | T |
| 0.58343713589000 | 0.01584497541880 | 0.45268950174200 | T | T | T |
| 0.58343752507800 | 0.01583786797420 | 0.78601351684200 | T | T | T |
| 0.91674398006200 | 0.01582277557670 | 0.11929226521200 | T | T | T |
| 0.91677941158000 | 0.01585211536550 | 0.45269949134800 | T | T | T |
| 0.91677432936500 | 0.01583845375630 | 0.78601237511800 | T | T | T |
| 0.12551846674000 | 0.06440900240260 | 0.05521271070780 | T | T | T |
| 0.12517765228300 | 0.06389973922160 | 0.38710812940500 | T | T | T |
| 0.12511198809400 | 0.06410223621330 | 0.72133484431100 | T | T | T |
| 0.45854191616000 | 0.06407878856280 | 0.05434943680000 | T | T | T |
| 0.45845619293800 | 0.06408123811030 | 0.38794035414700 | T | T | T |
| 0.45846246795400 | 0.06408666945960 | 0.72128801777400 | T | T | T |
| 0.79179136389300 | 0.06408463376300 | 0.05457588543200 | T | T | T |
| 0.79179466524200 | 0.06408341025380 | 0.38794206915200 | T | T | T |
| 0.79179440442300 | 0.06408785325380 | 0.72128207887300 | T | T | T |
| 0.12522418754300 | 0.06418492989360 | 0.27641357622600 | T | T | T |
| 0.12528109524700 | 0.06443437399210 | 0.61089418105800 | T | T | T |
| 0.12527186525100 | 0.06443728806760 | 0.94435457985200 | T | T | T |
| 0.45864329223000 | 0.06442261265700 | 0.27757414989500 | T | T | T |
| 0.45862639916900 | 0.06442494119660 | 0.61088860588900 | T | T | T |
| 0.45862915327900 | 0.06442018198120 | 0.94422285421300 | T | T | T |
| 0.79196021978800 | 0.06442481997410 | 0.27755769085400 | T | T | T |
| 0.79196205979600 | 0.06443034655640 | 0.61088985972700 | T | T | T |
| 0.79196067003900 | 0.06442691782430 | 0.94423023059300 | T | T | T |
| 0.12521977538400 | 0.06428687792620 | 0.16505915841600 | T | T | T |
| 0.12379931502100 | 0.06447342445470 | 0.49883128864400 | T | T | T |

|                  |                  |                  |   |   |   |
|------------------|------------------|------------------|---|---|---|
| 0.12379718324800 | 0.06445898517600 | 0.83217941403500 | T | T | T |
| 0.45731586156800 | 0.06451931580390 | 0.16554212108700 | T | T | T |
| 0.45712973986400 | 0.06445632268640 | 0.49883232223700 | T | T | T |
| 0.45713439929500 | 0.06445896030130 | 0.83217819017500 | T | T | T |
| 0.79047447072400 | 0.06446520951000 | 0.16550518623200 | T | T | T |
| 0.79047667609100 | 0.06445779068220 | 0.49883670089100 | T | T | T |
| 0.79047690903400 | 0.06446063158290 | 0.83218160855000 | T | T | T |
| 0.29213076505000 | 0.06399790532560 | 0.05367321764870 | T | T | T |
| 0.29176769852300 | 0.06404564591770 | 0.38805052239000 | T | T | T |
| 0.29178405922300 | 0.06402077576240 | 0.72136469219000 | T | T | T |
| 0.62512761675600 | 0.06403222911910 | 0.05467980399290 | T | T | T |
| 0.62512127845700 | 0.06401734945720 | 0.38802603946300 | T | T | T |
| 0.62511919051000 | 0.06401608024770 | 0.72134585440600 | T | T | T |
| 0.95846815380100 | 0.06405506408170 | 0.05475711289030 | T | T | T |
| 0.95845311690000 | 0.06404413050040 | 0.38803671149200 | T | T | T |
| 0.95845909846000 | 0.06402167691290 | 0.72135836877200 | T | T | T |
| 0.29178123740100 | 0.06409778799070 | 0.27654096497800 | T | T | T |
| 0.29195601924900 | 0.06420094255630 | 0.60997662819500 | T | T | T |
| 0.29196519292100 | 0.06418827515620 | 0.94334076535200 | T | T | T |
| 0.62528911784600 | 0.06431116201200 | 0.27719581750400 | T | T | T |
| 0.62529165953000 | 0.06421449413750 | 0.61002778537500 | T | T | T |
| 0.62529250380900 | 0.06420547494150 | 0.94332827850900 | T | T | T |
| 0.95862447720200 | 0.06440919029150 | 0.27753435143900 | T | T | T |
| 0.95862244808300 | 0.06420512897540 | 0.60998636257500 | T | T | T |
| 0.95861269369600 | 0.06421334050800 | 0.94338309855700 | T | T | T |
| 0.29207867281300 | 0.06427753331910 | 0.16571588720000 | T | T | T |
| 0.29197206385200 | 0.06416513465110 | 0.49886340122800 | T | T | T |
| 0.29197255693900 | 0.06416145489740 | 0.83221963772100 | T | T | T |
| 0.62531137450700 | 0.06418521782710 | 0.16558320151900 | T | T | T |
| 0.62531326930100 | 0.06416461101580 | 0.49888061916100 | T | T | T |

|                  |                  |                  |   |   |   |
|------------------|------------------|------------------|---|---|---|
| 0.62531025978500 | 0.06416440207380 | 0.83221005844300 | T | T | T |
| 0.95866530419200 | 0.06422271530610 | 0.16564020668500 | T | T | T |
| 0.95864565227900 | 0.06416795721730 | 0.49886412704000 | T | T | T |
| 0.95864753448700 | 0.06416378847200 | 0.83221248623200 | T | T | T |
| 0.04173624530860 | 0.06413523458790 | 0.05502093852870 | T | T | T |
| 0.04144956343200 | 0.06415153574760 | 0.38805711746400 | T | T | T |
| 0.04141950678650 | 0.06410223012580 | 0.72136057030000 | T | T | T |
| 0.37490392296800 | 0.06411150666210 | 0.05467520056020 | T | T | T |
| 0.37475479867300 | 0.06409659467230 | 0.38802799397400 | T | T | T |
| 0.37476157179800 | 0.06409350929910 | 0.72134162765300 | T | T | T |
| 0.70810434314400 | 0.06410142883390 | 0.05465983328890 | T | T | T |
| 0.70809558196700 | 0.06409326569800 | 0.38802140107700 | T | T | T |
| 0.70809046326300 | 0.06409362528730 | 0.72133850935500 | T | T | T |
| 0.04143777681010 | 0.06430298818760 | 0.27657593991600 | T | T | T |
| 0.04135878578440 | 0.06418035602760 | 0.60981180128700 | T | T | T |
| 0.04136341596970 | 0.06416493307160 | 0.94319169002400 | T | T | T |
| 0.37467654010700 | 0.06418742204800 | 0.27661192746100 | T | T | T |
| 0.37469997982500 | 0.06416440040310 | 0.60979083761400 | T | T | T |
| 0.37472073345100 | 0.06416531969910 | 0.94312780282900 | T | T | T |
| 0.70806014603200 | 0.06417960413110 | 0.27648834674700 | T | T | T |
| 0.70803526460200 | 0.06417068414140 | 0.60980957723500 | T | T | T |
| 0.70803680024700 | 0.06417014011530 | 0.94313940845000 | T | T | T |
| 0.04133832554890 | 0.06418906844350 | 0.16579667774800 | T | T | T |
| 0.04113121815250 | 0.06409355774600 | 0.49885725128200 | T | T | T |
| 0.04112682406200 | 0.06408709089000 | 0.83220846210100 | T | T | T |
| 0.37461603865400 | 0.06410146372870 | 0.16556054409400 | T | T | T |
| 0.37446114920800 | 0.06408366671480 | 0.49885773110100 | T | T | T |
| 0.37446430991600 | 0.06408303003380 | 0.83221135238300 | T | T | T |
| 0.70780228322500 | 0.06409714440340 | 0.16556306465800 | T | T | T |
| 0.70780086682100 | 0.06408629062040 | 0.49887503940400 | T | T | T |

|                  |                  |                   |   |   |   |
|------------------|------------------|-------------------|---|---|---|
| 0.70779839461200 | 0.06408871378740 | 0.83221025239700  | T | T | T |
| 0.20754074774000 | 0.06418318142040 | 0.05511431278210  | T | T | T |
| 0.20819251257000 | 0.06409832916440 | 0.38814662006300  | T | T | T |
| 0.20832671918800 | 0.06413091891010 | 0.72156269886200  | T | T | T |
| 0.54168165440900 | 0.06413463370200 | 0.05486590445450  | T | T | T |
| 0.54166583693000 | 0.06411769691290 | 0.38820224322200  | T | T | T |
| 0.54167366488900 | 0.06412287884640 | 0.72153904868700  | T | T | T |
| 0.87497333931600 | 0.06413621075570 | 0.05486853505510  | T | T | T |
| 0.87499930498700 | 0.06412854828390 | 0.38820937027400  | T | T | T |
| 0.87500763441300 | 0.06412620099920 | 0.72154312255000  | T | T | T |
| 0.20804306482000 | 0.06405040392330 | 0.27642823620100  | T | T | T |
| 0.20800495577700 | 0.06474327932070 | 0.61119987222700  | T | T | T |
| 0.20800535869600 | 0.06473713501360 | 0.94455503118500  | T | T | T |
| 0.54133114152500 | 0.06474330916030 | 0.27786447598000  | T | T | T |
| 0.54134377876500 | 0.06474390789800 | 0.61120911843500  | T | T | T |
| 0.54134312470300 | 0.06474445216930 | 0.94453742064800  | T | T | T |
| 0.87464551633100 | 0.06475490086160 | 0.27786251458600  | T | T | T |
| 0.87468334087100 | 0.06474248834320 | 0.61119855979700  | T | T | T |
| 0.87467011371200 | 0.06474070142650 | 0.94454058877500  | T | T | T |
| 0.20801898611100 | 0.06756462238040 | 0.16725828047300  | T | T | T |
| 0.20786822709200 | 0.06472235033130 | 0.49891663824500  | T | T | T |
| 0.20786749216300 | 0.06470457984290 | 0.83226582856600  | T | T | T |
| 0.54124751296900 | 0.06471879119510 | 0.16559559063500  | T | T | T |
| 0.54120952103500 | 0.06470596217720 | 0.49892441928900  | T | T | T |
| 0.54121214622700 | 0.06470660552830 | 0.83225729140400  | T | T | T |
| 0.87452868537100 | 0.06472236662800 | 0.16561317014300  | T | T | T |
| 0.87455196292900 | 0.06470685091110 | 0.49891361583800  | T | T | T |
| 0.87455606084200 | 0.06470831575380 | 0.83226391616700  | T | T | T |
| 0.00000000000000 | 0.13043999673400 | 0.00000000000000  | F | F | F |
| 0.00000000000000 | 0.13043999673400 | 0.333333333333400 | F | F | F |

|                    |                  |                    |   |   |   |
|--------------------|------------------|--------------------|---|---|---|
| 0.0000000000000000 | 0.13043999673400 | 0.666666666666600  | F | F | F |
| 0.333333333333400  | 0.13043999673400 | 0.0000000000000000 | F | F | F |
| 0.333333333333400  | 0.13043999673400 | 0.333333333333400  | F | F | F |
| 0.333333333333400  | 0.13043999673400 | 0.666666666666600  | F | F | F |
| 0.666666666666600  | 0.13043999673400 | 0.0000000000000000 | F | F | F |
| 0.666666666666600  | 0.13043999673400 | 0.333333333333400  | F | F | F |
| 0.666666666666600  | 0.13043999673400 | 0.666666666666600  | F | F | F |
| 0.0000000000000000 | 0.13043999673400 | 0.22222334138000   | F | F | F |
| 0.0000000000000000 | 0.13043999673400 | 0.55555667471300   | F | F | F |
| 0.0000000000000000 | 0.13043999673400 | 0.88889000804700   | F | F | F |
| 0.333333333333400  | 0.13043999673400 | 0.22222334138000   | F | F | F |
| 0.333333333333400  | 0.13043999673400 | 0.55555667471300   | F | F | F |
| 0.333333333333400  | 0.13043999673400 | 0.88889000804700   | F | F | F |
| 0.666666666666600  | 0.13043999673400 | 0.22222334138000   | F | F | F |
| 0.666666666666600  | 0.13043999673400 | 0.55555667471300   | F | F | F |
| 0.666666666666600  | 0.13043999673400 | 0.88889000804700   | F | F | F |
| 0.0000000000000000 | 0.13043999673400 | 0.11111000180100   | F | F | F |
| 0.0000000000000000 | 0.13043999673400 | 0.44444333513300   | F | F | F |
| 0.0000000000000000 | 0.13043999673400 | 0.77777666846700   | F | F | F |
| 0.333333333333400  | 0.13043999673400 | 0.11111000180100   | F | F | F |
| 0.333333333333400  | 0.13043999673400 | 0.44444333513300   | F | F | F |
| 0.333333333333400  | 0.13043999673400 | 0.77777666846700   | F | F | F |
| 0.666666666666600  | 0.13043999673400 | 0.11111000180100   | F | F | F |
| 0.666666666666600  | 0.13043999673400 | 0.44444333513300   | F | F | F |
| 0.666666666666600  | 0.13043999673400 | 0.77777666846700   | F | F | F |
| 0.166666666667500  | 0.13043999673400 | 0.0000000000000000 | F | F | F |
| 0.166666666667500  | 0.13043999673400 | 0.333333333333400  | F | F | F |
| 0.166666666667500  | 0.13043999673400 | 0.666666666666600  | F | F | F |
| 0.500000000000900  | 0.13043999673400 | 0.0000000000000000 | F | F | F |
| 0.500000000000900  | 0.13043999673400 | 0.333333333333400  | F | F | F |

|                  |                  |                  |   |   |   |
|------------------|------------------|------------------|---|---|---|
| 0.50000000000900 | 0.13043999673400 | 0.66666666666600 | F | F | F |
| 0.83333333334100 | 0.13043999673400 | 0.00000000000000 | F | F | F |
| 0.83333333334100 | 0.13043999673400 | 0.33333333333400 | F | F | F |
| 0.83333333334100 | 0.13043999673400 | 0.66666666666600 | F | F | F |
| 0.16666666667500 | 0.13043999673400 | 0.22222334138000 | F | F | F |
| 0.16666666667500 | 0.13043999673400 | 0.55555667471300 | F | F | F |
| 0.16666666667500 | 0.13043999673400 | 0.88889000804700 | F | F | F |
| 0.50000000000900 | 0.13043999673400 | 0.22222334138000 | F | F | F |
| 0.50000000000900 | 0.13043999673400 | 0.55555667471300 | F | F | F |
| 0.50000000000900 | 0.13043999673400 | 0.88889000804700 | F | F | F |
| 0.83333333334100 | 0.13043999673400 | 0.22222334138000 | F | F | F |
| 0.83333333334100 | 0.13043999673400 | 0.55555667471300 | F | F | F |
| 0.83333333334100 | 0.13043999673400 | 0.88889000804700 | F | F | F |
| 0.16666666667500 | 0.13043999673400 | 0.11111000180100 | F | F | F |
| 0.16666666667500 | 0.13043999673400 | 0.44444333513300 | F | F | F |
| 0.16666666667500 | 0.13043999673400 | 0.77777666846700 | F | F | F |
| 0.50000000000900 | 0.13043999673400 | 0.11111000180100 | F | F | F |
| 0.50000000000900 | 0.13043999673400 | 0.44444333513300 | F | F | F |
| 0.50000000000900 | 0.13043999673400 | 0.77777666846700 | F | F | F |
| 0.83333333334100 | 0.13043999673400 | 0.11111000180100 | F | F | F |
| 0.83333333334100 | 0.13043999673400 | 0.44444333513300 | F | F | F |
| 0.83333333334100 | 0.13043999673400 | 0.77777666846700 | F | F | F |
| 0.08333333332670 | 0.13043999673400 | 0.00000000000000 | F | F | F |
| 0.08333333332670 | 0.13043999673400 | 0.33333333333400 | F | F | F |
| 0.08333333332670 | 0.13043999673400 | 0.66666666666600 | F | F | F |
| 0.41666666666100 | 0.13043999673400 | 0.00000000000000 | F | F | F |
| 0.41666666666100 | 0.13043999673400 | 0.33333333333400 | F | F | F |
| 0.41666666666100 | 0.13043999673400 | 0.66666666666600 | F | F | F |
| 0.74999999999300 | 0.13043999673400 | 0.00000000000000 | F | F | F |
| 0.74999999999300 | 0.13043999673400 | 0.33333333333400 | F | F | F |



|                 |                  |                  |   |   |   |
|-----------------|------------------|------------------|---|---|---|
| 0.7499999999300 | 0.13043999673400 | 0.66666666666600 | F | F | F |
| 0.0833333332670 | 0.13043999673400 | 0.22222334138000 | F | F | F |
| 0.0833333332670 | 0.13043999673400 | 0.55555667471300 | F | F | F |
| 0.0833333332670 | 0.13043999673400 | 0.88889000804700 | F | F | F |
| 0.4166666666100 | 0.13043999673400 | 0.22222334138000 | F | F | F |
| 0.4166666666100 | 0.13043999673400 | 0.55555667471300 | F | F | F |
| 0.4166666666100 | 0.13043999673400 | 0.88889000804700 | F | F | F |
| 0.7499999999300 | 0.13043999673400 | 0.22222334138000 | F | F | F |
| 0.7499999999300 | 0.13043999673400 | 0.55555667471300 | F | F | F |
| 0.7499999999300 | 0.13043999673400 | 0.88889000804700 | F | F | F |
| 0.0833333332670 | 0.13043999673400 | 0.11111000180100 | F | F | F |
| 0.0833333332670 | 0.13043999673400 | 0.44444333513300 | F | F | F |
| 0.0833333332670 | 0.13043999673400 | 0.77777666846700 | F | F | F |
| 0.4166666666100 | 0.13043999673400 | 0.11111000180100 | F | F | F |
| 0.4166666666100 | 0.13043999673400 | 0.44444333513300 | F | F | F |
| 0.4166666666100 | 0.13043999673400 | 0.77777666846700 | F | F | F |
| 0.7499999999300 | 0.13043999673400 | 0.11111000180100 | F | F | F |
| 0.7499999999300 | 0.13043999673400 | 0.44444333513300 | F | F | F |
| 0.7499999999300 | 0.13043999673400 | 0.77777666846700 | F | F | F |
| 0.2500000008900 | 0.13043999673400 | 0.00000000000000 | F | F | F |
| 0.2500000008900 | 0.13043999673400 | 0.33333333333400 | F | F | F |
| 0.2500000008900 | 0.13043999673400 | 0.66666666666600 | F | F | F |
| 0.5833333342100 | 0.13043999673400 | 0.00000000000000 | F | F | F |
| 0.5833333342100 | 0.13043999673400 | 0.33333333333400 | F | F | F |
| 0.5833333342100 | 0.13043999673400 | 0.66666666666600 | F | F | F |
| 0.9166666675500 | 0.13043999673400 | 0.00000000000000 | F | F | F |
| 0.9166666675500 | 0.13043999673400 | 0.33333333333400 | F | F | F |
| 0.9166666675500 | 0.13043999673400 | 0.66666666666600 | F | F | F |
| 0.2500000008900 | 0.13043999673400 | 0.22222334138000 | F | F | F |
| 0.2500000008900 | 0.13043999673400 | 0.55555667471300 | F | F | F |

|                  |                  |                  |   |   |   |
|------------------|------------------|------------------|---|---|---|
| 0.25000000008900 | 0.13043999673400 | 0.88889000804700 | F | F | F |
| 0.58333333342100 | 0.13043999673400 | 0.22222334138000 | F | F | F |
| 0.58333333342100 | 0.13043999673400 | 0.55555667471300 | F | F | F |
| 0.58333333342100 | 0.13043999673400 | 0.88889000804700 | F | F | F |
| 0.91666666675500 | 0.13043999673400 | 0.22222334138000 | F | F | F |
| 0.91666666675500 | 0.13043999673400 | 0.55555667471300 | F | F | F |
| 0.91666666675500 | 0.13043999673400 | 0.88889000804700 | F | F | F |
| 0.25000000008900 | 0.13043999673400 | 0.11111000180100 | F | F | F |
| 0.25000000008900 | 0.13043999673400 | 0.44444333513300 | F | F | F |
| 0.25000000008900 | 0.13043999673400 | 0.77777666846700 | F | F | F |
| 0.58333333342100 | 0.13043999673400 | 0.11111000180100 | F | F | F |
| 0.58333333342100 | 0.13043999673400 | 0.44444333513300 | F | F | F |
| 0.58333333342100 | 0.13043999673400 | 0.77777666846700 | F | F | F |
| 0.91666666675500 | 0.13043999673400 | 0.11111000180100 | F | F | F |
| 0.91666666675500 | 0.13043999673400 | 0.44444333513300 | F | F | F |
| 0.91666666675500 | 0.13043999673400 | 0.77777666846700 | F | F | F |
| 0.12592316121100 | 0.19637986195400 | 0.05540822199270 | T | T | T |
| 0.12522633179000 | 0.19670887266500 | 0.38813922524800 | T | T | T |
| 0.12523061648900 | 0.19675306927100 | 0.72143355590200 | T | T | T |
| 0.45864448128400 | 0.19675603367800 | 0.05467767190140 | T | T | T |
| 0.45857038325000 | 0.19677086397000 | 0.38806719843200 | T | T | T |
| 0.45856040471900 | 0.19676710911700 | 0.72140158992500 | T | T | T |
| 0.79185353291200 | 0.19676582550000 | 0.05469849091840 | T | T | T |
| 0.79200189947100 | 0.19675936623700 | 0.38811410259900 | T | T | T |
| 0.79202392262900 | 0.19674615169400 | 0.72145837700500 | T | T | T |
| 0.12523449348100 | 0.19660191085700 | 0.27645021243100 | T | T | T |
| 0.12523631474900 | 0.19660344073500 | 0.60982094624000 | T | T | T |
| 0.12519719938000 | 0.19658253941700 | 0.94324717222000 | T | T | T |
| 0.45859469647300 | 0.19661141986500 | 0.27649754357700 | T | T | T |
| 0.45857712249400 | 0.19661449882200 | 0.60981362977900 | T | T | T |

|                  |                  |                  |   |   |   |
|------------------|------------------|------------------|---|---|---|
| 0.45858294174800 | 0.19661833160200 | 0.94314809812500 | T | T | T |
| 0.79191329430300 | 0.19661848302300 | 0.27648843484500 | T | T | T |
| 0.79191962609800 | 0.19661524078100 | 0.60982080995500 | T | T | T |
| 0.79191340185500 | 0.19661171976400 | 0.94315232054700 | T | T | T |
| 0.12540373697100 | 0.19696281318100 | 0.16476079714400 | T | T | T |
| 0.12523205130000 | 0.19623494066800 | 0.49899307271600 | T | T | T |
| 0.12522868094300 | 0.19625462061000 | 0.83234202653300 | T | T | T |
| 0.45860455621600 | 0.19624462768800 | 0.16568019764800 | T | T | T |
| 0.45856375809100 | 0.19625458942000 | 0.49899564825400 | T | T | T |
| 0.45856795221900 | 0.19625221572400 | 0.83233950941000 | T | T | T |
| 0.79189602300200 | 0.19624689569300 | 0.16566349254300 | T | T | T |
| 0.79190782202200 | 0.19625385614900 | 0.49899768206900 | T | T | T |
| 0.79190860326000 | 0.19625042313800 | 0.83234011317800 | T | T | T |
| 0.29210386264000 | 0.19657419047600 | 0.05474689965760 | T | T | T |
| 0.29204107949600 | 0.19672532667200 | 0.38823103239900 | T | T | T |
| 0.29204720042000 | 0.19675586583100 | 0.72155057685500 | T | T | T |
| 0.62536881102200 | 0.19674070698800 | 0.05488156665000 | T | T | T |
| 0.62538894589300 | 0.19676576182600 | 0.38821373723500 | T | T | T |
| 0.62538066537300 | 0.19675633024300 | 0.72154478533500 | T | T | T |
| 0.95869262498500 | 0.19669995216900 | 0.05493495546570 | T | T | T |
| 0.95879192350200 | 0.19674931638900 | 0.38818836931400 | T | T | T |
| 0.95882157606000 | 0.19676317256600 | 0.72151403814800 | T | T | T |
| 0.29170758633700 | 0.19679487927400 | 0.27644249934600 | T | T | T |
| 0.29188454774200 | 0.19660971590300 | 0.60992569841000 | T | T | T |
| 0.29192594916900 | 0.19661247294000 | 0.94325870680300 | T | T | T |
| 0.62521157175700 | 0.19658842462200 | 0.27663050527500 | T | T | T |
| 0.62522100696900 | 0.19659833449200 | 0.60996303906900 | T | T | T |
| 0.62522081187600 | 0.19660332052800 | 0.94328033110900 | T | T | T |
| 0.95855400343700 | 0.19653873598000 | 0.27669400312700 | T | T | T |
| 0.95855422640800 | 0.19660245803900 | 0.60993268636700 | T | T | T |

|                  |                  |                  |   |   |   |
|------------------|------------------|------------------|---|---|---|
| 0.95854244479700 | 0.19659658409100 | 0.94331006370700 | T | T | T |
| 0.29198149061900 | 0.19655449289100 | 0.16578940319100 | T | T | T |
| 0.29200714045300 | 0.19651732065200 | 0.49902266904100 | T | T | T |
| 0.29200452183700 | 0.19651679513200 | 0.83238585233700 | T | T | T |
| 0.62534178533700 | 0.19648431193300 | 0.16574200249400 | T | T | T |
| 0.62534767697600 | 0.19651245334100 | 0.49904184148300 | T | T | T |
| 0.62534520413900 | 0.19651349601300 | 0.83236958327200 | T | T | T |
| 0.95868642208900 | 0.19645309811200 | 0.16581779592100 | T | T | T |
| 0.95868195847900 | 0.19651058340400 | 0.49902391260500 | T | T | T |
| 0.95868406839800 | 0.19651401612300 | 0.83237539947800 | T | T | T |
| 0.04188776017270 | 0.19658967087900 | 0.05514853622800 | T | T | T |
| 0.04158390834950 | 0.19663288455700 | 0.38827398544200 | T | T | T |
| 0.04162333824520 | 0.19668429106000 | 0.72162189652600 | T | T | T |
| 0.37560278061700 | 0.19666288367000 | 0.05478407002120 | T | T | T |
| 0.37491717228300 | 0.19669007820700 | 0.38829175244200 | T | T | T |
| 0.37492301311300 | 0.19669028207600 | 0.72161436336600 | T | T | T |
| 0.70825233093900 | 0.19667867391500 | 0.05494159846030 | T | T | T |
| 0.70828394991300 | 0.19668705344800 | 0.38828886293600 | T | T | T |
| 0.70828952491100 | 0.19668543194300 | 0.72161599966700 | T | T | T |
| 0.04140629973790 | 0.19646465646900 | 0.27664755272200 | T | T | T |
| 0.04138700454060 | 0.19655238877400 | 0.60987844432700 | T | T | T |
| 0.04139160978000 | 0.19655228315600 | 0.94327416956800 | T | T | T |
| 0.37470624118300 | 0.19652107722100 | 0.27672599448400 | T | T | T |
| 0.37472584736400 | 0.19657091154100 | 0.60985451932100 | T | T | T |
| 0.37474877783800 | 0.19657996780600 | 0.94318818487600 | T | T | T |
| 0.70806014871900 | 0.19654422669900 | 0.27661052835100 | T | T | T |
| 0.70806213600700 | 0.19656263820100 | 0.60987995348600 | T | T | T |
| 0.70806271829000 | 0.19656192442600 | 0.94320966293200 | T | T | T |
| 0.04159057638100 | 0.19649082142700 | 0.16596796805500 | T | T | T |
| 0.04140382106100 | 0.19649468783500 | 0.49904511827800 | T | T | T |

|                  |                  |                  |   |   |   |
|------------------|------------------|------------------|---|---|---|
| 0.04139806098020 | 0.19649615159700 | 0.83239655607200 | T | T | T |
| 0.37474455674800 | 0.19655974859900 | 0.16569244595200 | T | T | T |
| 0.37473266780900 | 0.19650206750800 | 0.49904554140600 | T | T | T |
| 0.37473824470300 | 0.19649928694400 | 0.83240115634300 | T | T | T |
| 0.70807378678700 | 0.19647773588800 | 0.16575063315000 | T | T | T |
| 0.70807507652300 | 0.19649640194500 | 0.49906371121100 | T | T | T |
| 0.70807249264600 | 0.19649320021300 | 0.83239877058600 | T | T | T |
| 0.20723640673800 | 0.19655815124200 | 0.05527064430100 | T | T | T |
| 0.20860886297400 | 0.19665340565800 | 0.38812409529800 | T | T | T |
| 0.20866286232900 | 0.19669150179400 | 0.72148180194800 | T | T | T |
| 0.54193332618200 | 0.19668842287800 | 0.05478134662350 | T | T | T |
| 0.54201626828700 | 0.19670468558600 | 0.38811525326600 | T | T | T |
| 0.54194492861000 | 0.19669887207700 | 0.72145721883800 | T | T | T |
| 0.87510164025400 | 0.19667582640500 | 0.05479273826050 | T | T | T |
| 0.87599461657100 | 0.19669242014300 | 0.38811549065200 | T | T | T |
| 0.87608025868600 | 0.19669599611100 | 0.72145308498000 | T | T | T |
| 0.20806182197000 | 0.19741530331300 | 0.27622873577700 | T | T | T |
| 0.20805824042200 | 0.19652353471200 | 0.61002866490400 | T | T | T |
| 0.20804918227000 | 0.19640885674600 | 0.94404361428800 | T | T | T |
| 0.54140173703800 | 0.19652190384600 | 0.27675848909300 | T | T | T |
| 0.54139705758900 | 0.19651946822300 | 0.61006553147600 | T | T | T |
| 0.54139610651500 | 0.19652534034300 | 0.94337733039500 | T | T | T |
| 0.87472873700600 | 0.19650561959700 | 0.27679449199200 | T | T | T |
| 0.87473308860600 | 0.19652628849600 | 0.61002347482000 | T | T | T |
| 0.87472581515000 | 0.19652203375000 | 0.94338538101800 | T | T | T |
| 0.20823609166000 | 0.19460872035000 | 0.16713281878800 | T | T | T |
| 0.20817189265900 | 0.19620399668400 | 0.49898646499500 | T | T | T |
| 0.20817411454100 | 0.19620819921100 | 0.83234259310900 | T | T | T |
| 0.54152212743400 | 0.19619700106200 | 0.16567205910700 | T | T | T |
| 0.54151437240000 | 0.19620792578400 | 0.49899627280900 | T | T | T |

|                  |                  |                  |   |   |   |
|------------------|------------------|------------------|---|---|---|
| 0.54151924844500 | 0.19620793223000 | 0.83232735832300 | T | T | T |
| 0.87481469415400 | 0.19618480550800 | 0.16569146880800 | T | T | T |
| 0.87485776567600 | 0.19620889889400 | 0.49898531902800 | T | T | T |
| 0.87486303222100 | 0.19620574315000 | 0.83233538304100 | T | T | T |
| 0.00072786081142 | 0.24480586844600 | 0.00746968580468 | T | T | T |
| 0.00070502917060 | 0.24482132558700 | 0.34080604735500 | T | T | T |
| 0.00069028475053 | 0.24476534072300 | 0.67414512863700 | T | T | T |
| 0.33403619715400 | 0.24476099755400 | 0.00746683062108 | T | T | T |
| 0.33394199823500 | 0.24484109445400 | 0.34077549864500 | T | T | T |
| 0.33400038553300 | 0.24476911635700 | 0.67414569316900 | T | T | T |
| 0.66733639534600 | 0.24474855434300 | 0.00748402436220 | T | T | T |
| 0.66733584437700 | 0.24478462214700 | 0.34082678175700 | T | T | T |
| 0.66734044284000 | 0.24476150821900 | 0.67415787001500 | T | T | T |
| 0.33240465977900 | 0.24509401448000 | 0.22998170786000 | T | T | T |
| 0.33250742681100 | 0.24482164351600 | 0.56336903795600 | T | T | T |
| 0.33250986881800 | 0.24484982519800 | 0.89669273753900 | T | T | T |
| 0.66584273923000 | 0.24488642590500 | 0.23002184219600 | T | T | T |
| 0.66584846136600 | 0.24483270443500 | 0.56336886423800 | T | T | T |
| 0.66584856678700 | 0.24482725919900 | 0.89670303198700 | T | T | T |
| 0.99939209575000 | 0.24495190610400 | 0.22999541160500 | T | T | T |
| 0.99918180385800 | 0.24481301362900 | 0.56336590792900 | T | T | T |
| 0.99918405630600 | 0.24483409668900 | 0.89669229159800 | T | T | T |
| 0.00079428718251 | 0.24489005369700 | 0.11930261502900 | T | T | T |
| 0.00090981404319 | 0.24484561507000 | 0.45278275090300 | T | T | T |
| 0.00091675125289 | 0.24484847364500 | 0.78612149611100 | T | T | T |
| 0.33451257162900 | 0.24483459601400 | 0.11801491296200 | T | T | T |
| 0.33422934669300 | 0.24486022983900 | 0.45278281849600 | T | T | T |
| 0.33423247114100 | 0.24486940407700 | 0.78610781126200 | T | T | T |
| 0.66756486885500 | 0.24486961020300 | 0.11941421603500 | T | T | T |
| 0.66757273162300 | 0.24484665219200 | 0.45278485297800 | T | T | T |

|                  |                  |                  |   |   |   |
|------------------|------------------|------------------|---|---|---|
| 0.66757152127100 | 0.24484883994000 | 0.78611024730800 | T | T | T |
| 0.16717388329700 | 0.24496407049800 | 0.00778127294125 | T | T | T |
| 0.16731053483600 | 0.24480376444400 | 0.34072023388200 | T | T | T |
| 0.16729108367800 | 0.24475304901400 | 0.67425545852000 | T | T | T |
| 0.50063614955200 | 0.24471660395600 | 0.00759550386814 | T | T | T |
| 0.50062292173800 | 0.24474354976100 | 0.34094111228500 | T | T | T |
| 0.50062617117200 | 0.24473769412200 | 0.67426554468200 | T | T | T |
| 0.83395550302600 | 0.24471938278100 | 0.00759382102780 | T | T | T |
| 0.83400781742200 | 0.24472486372800 | 0.34096956992100 | T | T | T |
| 0.83402142436700 | 0.24470894067100 | 0.67430771249600 | T | T | T |
| 0.16555270300900 | 0.25276670561200 | 0.22415899531500 | T | T | T |
| 0.16575251076600 | 0.24823846199300 | 0.55927949609800 | T | T | T |
| 0.16578112260500 | 0.24820834202700 | 0.89266431005600 | T | T | T |
| 0.49910486829600 | 0.24824840211700 | 0.22594954079800 | T | T | T |
| 0.49909107181300 | 0.24823522111200 | 0.55928756028400 | T | T | T |
| 0.49909278510000 | 0.24823334410100 | 0.89262439747800 | T | T | T |
| 0.83244013409500 | 0.24825467988000 | 0.22594407097700 | T | T | T |
| 0.83242988890500 | 0.24822780224600 | 0.55928951580600 | T | T | T |
| 0.83243280134200 | 0.24823112548700 | 0.89262817715600 | T | T | T |
| 0.16304235663800 | 0.26953775708800 | 0.10704396081000 | T | T | T |
| 0.16751465595700 | 0.24478136347000 | 0.45126754982900 | T | T | T |
| 0.16751449107300 | 0.24476317045200 | 0.78460848286700 | T | T | T |
| 0.50086510307600 | 0.24475077238700 | 0.11794131887300 | T | T | T |
| 0.50085317899200 | 0.24473821440900 | 0.45127913965800 | T | T | T |
| 0.50085681207900 | 0.24475637093800 | 0.78461447742000 | T | T | T |
| 0.83413622468000 | 0.24475536419400 | 0.11794876842300 | T | T | T |
| 0.83421199734200 | 0.24468124110100 | 0.45122855241800 | T | T | T |
| 0.83422030998200 | 0.24468342086300 | 0.78454189321000 | T | T | T |
| 0.08358926125810 | 0.24476822915700 | 0.00742125775951 | T | T | T |
| 0.08350019649310 | 0.24468920020800 | 0.34064616887700 | T | T | T |

|                  |                  |                  |   |   |   |
|------------------|------------------|------------------|---|---|---|
| 0.08349489648670 | 0.24466965759400 | 0.67406742603100 | T | T | T |
| 0.41686387375600 | 0.24466449689600 | 0.00737139766370 | T | T | T |
| 0.41681145354100 | 0.24469750626700 | 0.34074535109600 | T | T | T |
| 0.41682780173800 | 0.24465770904600 | 0.67407280737600 | T | T | T |
| 0.75016304895300 | 0.24463935470000 | 0.00741148904980 | T | T | T |
| 0.75017748122300 | 0.24467057697900 | 0.34075099645300 | T | T | T |
| 0.75018138032600 | 0.24465047249900 | 0.67408272098800 | T | T | T |
| 0.08242078054870 | 0.24487240021200 | 0.22973910942900 | T | T | T |
| 0.08136911173720 | 0.24477970913600 | 0.56303188334300 | T | T | T |
| 0.08136999306450 | 0.24480430199100 | 0.89635871048100 | T | T | T |
| 0.41470800724900 | 0.24485322025800 | 0.22962895229900 | T | T | T |
| 0.41470162560500 | 0.24478767582500 | 0.56304328598300 | T | T | T |
| 0.41470676218600 | 0.24480289391300 | 0.89637915286600 | T | T | T |
| 0.74804737769500 | 0.24482844421000 | 0.22968192846300 | T | T | T |
| 0.74804492342400 | 0.24479305122900 | 0.56304401970900 | T | T | T |
| 0.74804668017200 | 0.24479560560100 | 0.89637956468700 | T | T | T |
| 0.08349402197610 | 0.24546094414200 | 0.11987182163500 | T | T | T |
| 0.08331087002280 | 0.24488457968100 | 0.45279100271200 | T | T | T |
| 0.08331469613080 | 0.24487980513300 | 0.78614221716500 | T | T | T |
| 0.41671938230500 | 0.24489596287500 | 0.11941487999000 | T | T | T |
| 0.41664015027800 | 0.24487344816700 | 0.45280974251300 | T | T | T |
| 0.41664875946200 | 0.24489081595000 | 0.78613312882400 | T | T | T |
| 0.74997626043000 | 0.24488422042700 | 0.11945057497000 | T | T | T |
| 0.74999257934800 | 0.24487054449400 | 0.45280800840000 | T | T | T |
| 0.74999262759800 | 0.24487771091300 | 0.78612839976600 | T | T | T |
| 0.25013321650800 | 0.24472980871300 | 0.00748628281249 | T | T | T |
| 0.25023333965600 | 0.24471643190000 | 0.34065790224600 | T | T | T |
| 0.25026054586500 | 0.24466112907400 | 0.67411481281200 | T | T | T |
| 0.58359249006200 | 0.24462840958900 | 0.00746151819098 | T | T | T |
| 0.58359772493100 | 0.24465790996700 | 0.34080146209400 | T | T | T |



|                  |                  |                  |   |   |   |
|------------------|------------------|------------------|---|---|---|
| 0.58359620764500 | 0.24464624252800 | 0.67413388493700 | T | T | T |
| 0.91693301636600 | 0.24464131182000 | 0.00745944780121 | T | T | T |
| 0.91698164607100 | 0.24469677779600 | 0.34077269893700 | T | T | T |
| 0.91697609216400 | 0.24465938990500 | 0.67408797659200 | T | T | T |
| 0.24973943867300 | 0.24787355659300 | 0.22801218969700 | T | T | T |
| 0.25021137293000 | 0.24445802100800 | 0.56308725692400 | T | T | T |
| 0.25017595439500 | 0.24448094871400 | 0.89645915426000 | T | T | T |
| 0.58355337204700 | 0.24453326204200 | 0.22972790833300 | T | T | T |
| 0.58355185521800 | 0.24447994003800 | 0.56308559970300 | T | T | T |
| 0.58355125555000 | 0.24446646327400 | 0.89642550507700 | T | T | T |
| 0.91692927920900 | 0.24456565961400 | 0.22968406381700 | T | T | T |
| 0.91688804424100 | 0.24444982430100 | 0.56309302950700 | T | T | T |
| 0.91688907140500 | 0.24446097623000 | 0.89643483109000 | T | T | T |
| 0.25425398159200 | 0.24463150843600 | 0.11773277802600 | T | T | T |
| 0.25177875612700 | 0.24490597947500 | 0.45278658996000 | T | T | T |
| 0.25177486028900 | 0.24491519068600 | 0.78613457860000 | T | T | T |
| 0.58510942703800 | 0.24490057537800 | 0.11943245562200 | T | T | T |
| 0.58511981611400 | 0.24488241048800 | 0.45281440778300 | T | T | T |
| 0.58511920020700 | 0.24488014217000 | 0.78613520044400 | T | T | T |
| 0.91833758193100 | 0.24487996763700 | 0.11938566052600 | T | T | T |
| 0.91848314230500 | 0.24493300174500 | 0.45288424142900 | T | T | T |
| 0.91849319977400 | 0.24496036895300 | 0.78622362327600 | T | T | T |
| 0.12500270219800 | 0.99535940724900 | 0.03111492155390 | T | T | T |
| 0.12536996182000 | 0.99524013471100 | 0.36353698540900 | T | T | T |
| 0.12503529764900 | 0.99522228706800 | 0.69760692528700 | T | T | T |
| 0.45840919418300 | 0.99507981996200 | 0.03083744670200 | T | T | T |
| 0.45837969521000 | 0.99519266396900 | 0.36423172284200 | T | T | T |
| 0.45837523271000 | 0.99518712865600 | 0.69758692966400 | T | T | T |
| 0.79168932254900 | 0.99517333882700 | 0.03090176735390 | T | T | T |
| 0.79169223958500 | 0.99519366443200 | 0.36422997615400 | T | T | T |

|                  |                  |                  |   |   |   |
|------------------|------------------|------------------|---|---|---|
| 0.79170156337800 | 0.99518072530900 | 0.69758470794000 | T | T | T |
| 0.12435882101700 | 0.99735205819300 | 0.25168744555800 | T | T | T |
| 0.12463768589600 | 0.99763458185200 | 0.58465929511300 | T | T | T |
| 0.12463810324900 | 0.99766249191100 | 0.91796097634200 | T | T | T |
| 0.45803568986100 | 0.99764762228000 | 0.25128720331300 | T | T | T |
| 0.45798557014000 | 0.99762178530100 | 0.58464658599300 | T | T | T |
| 0.45799430946600 | 0.99762533713500 | 0.91797104562300 | T | T | T |
| 0.79128593407600 | 0.99763828998000 | 0.25129215946600 | T | T | T |
| 0.79131030098500 | 0.99762742686800 | 0.58464698154300 | T | T | T |
| 0.79130282804300 | 0.99763711346900 | 0.91797140187200 | T | T | T |
| 0.12353599934200 | 0.99499220850200 | 0.14251157770800 | T | T | T |
| 0.12414045939700 | 0.99586706539700 | 0.47457816275300 | T | T | T |
| 0.12413465597100 | 0.99581032947900 | 0.80788468917700 | T | T | T |
| 0.45829098284300 | 0.99556908696800 | 0.14145678092500 | T | T | T |
| 0.45748427874400 | 0.99579768395100 | 0.47456995828400 | T | T | T |
| 0.45747727153000 | 0.99580779765200 | 0.80790187152300 | T | T | T |
| 0.79076310086700 | 0.99581657057100 | 0.14122642656500 | T | T | T |
| 0.79079827845700 | 0.99580351849600 | 0.47457330505200 | T | T | T |
| 0.79079690354900 | 0.99581432618300 | 0.80790626871400 | T | T | T |
| 0.29212115633500 | 0.99509841705300 | 0.03015997178970 | T | T | T |
| 0.29200076159900 | 0.99558344396400 | 0.36379658690900 | T | T | T |
| 0.29207180624400 | 0.99542491716100 | 0.69712934669400 | T | T | T |
| 0.62541444103400 | 0.99544778757100 | 0.03046297690940 | T | T | T |
| 0.62542143247600 | 0.99540851725000 | 0.36379357641400 | T | T | T |
| 0.62541176022700 | 0.99541612661700 | 0.69711978502500 | T | T | T |
| 0.95873682079200 | 0.99550453216100 | 0.03043280256850 | T | T | T |
| 0.95873834659800 | 0.99542222671200 | 0.36387190424600 | T | T | T |
| 0.95874334298700 | 0.99543640486300 | 0.69712289260100 | T | T | T |
| 0.29079797750300 | 0.99505295562100 | 0.25260903780400 | T | T | T |
| 0.29083595249100 | 0.99509333938900 | 0.58620968888800 | T | T | T |

|                  |                  |                  |   |   |   |
|------------------|------------------|------------------|---|---|---|
| 0.29085141356600 | 0.99509471652500 | 0.91949985563000 | T | T | T |
| 0.62418004991000 | 0.99540024913800 | 0.25304796684700 | T | T | T |
| 0.62417122994700 | 0.99513318276700 | 0.58621876893500 | T | T | T |
| 0.62417288804600 | 0.99511601609800 | 0.91953811374800 | T | T | T |
| 0.95743436567000 | 0.99566914350800 | 0.25318729891800 | T | T | T |
| 0.95751199525500 | 0.99510598344600 | 0.58621039913900 | T | T | T |
| 0.95750112835600 | 0.99512880032000 | 0.91953023710600 | T | T | T |
| 0.29327860236800 | 0.99482080694400 | 0.14185160322900 | T | T | T |
| 0.29146646329700 | 0.99474456219200 | 0.47548288512100 | T | T | T |
| 0.29147962310500 | 0.99473613796800 | 0.80879755870100 | T | T | T |
| 0.62486453796600 | 0.99479620994300 | 0.14215305867400 | T | T | T |
| 0.62481586926700 | 0.99472894218200 | 0.47548225006300 | T | T | T |
| 0.62481708189600 | 0.99473073606800 | 0.80881204542500 | T | T | T |
| 0.95799486942200 | 0.99495847468300 | 0.14214028252500 | T | T | T |
| 0.95814976731900 | 0.99472539271700 | 0.47549836352100 | T | T | T |
| 0.95814510046700 | 0.99473547847000 | 0.80879483330300 | T | T | T |
| 0.04196072133820 | 0.99529947681100 | 0.03078268270420 | T | T | T |
| 0.04207990052870 | 0.99527350371200 | 0.36417014537800 | T | T | T |
| 0.04199197861380 | 0.99520095169200 | 0.69743089587400 | T | T | T |
| 0.37538704957100 | 0.99518372129300 | 0.03073446327680 | T | T | T |
| 0.37531053410500 | 0.99524076498600 | 0.36409893355400 | T | T | T |
| 0.37532632950200 | 0.99518199831500 | 0.69742224214700 | T | T | T |
| 0.70864722898800 | 0.99519510840600 | 0.03075568969200 | T | T | T |
| 0.70867976466600 | 0.99516311302200 | 0.36411066280600 | T | T | T |
| 0.70865857382400 | 0.99518263801500 | 0.69741990331100 | T | T | T |
| 0.04055673817580 | 0.99493788460500 | 0.25328952734700 | T | T | T |
| 0.04058310351990 | 0.99455606832600 | 0.58660151065900 | T | T | T |
| 0.04056274733410 | 0.99453143985500 | 0.91987566679100 | T | T | T |
| 0.37400149733400 | 0.99472150066500 | 0.25325420515400 | T | T | T |
| 0.37391766165000 | 0.99452195543600 | 0.58658695450900 | T | T | T |

|                  |                  |                  |   |   |   |
|------------------|------------------|------------------|---|---|---|
| 0.37392200076700 | 0.99452916892400 | 0.91990439986600 | T | T | T |
| 0.70723472881900 | 0.99458197723200 | 0.25325582045400 | T | T | T |
| 0.70724710418100 | 0.99454107742600 | 0.58658746540600 | T | T | T |
| 0.70724346098700 | 0.99454569980900 | 0.91991600825100 | T | T | T |
| 0.04006642313130 | 0.99515450569900 | 0.14202908141800 | T | T | T |
| 0.04066340461560 | 0.99503937264000 | 0.47498721127300 | T | T | T |
| 0.04060947204940 | 0.99495899923300 | 0.80834822943300 | T | T | T |
| 0.37534266195000 | 0.99503678368300 | 0.14160629733000 | T | T | T |
| 0.37394944612500 | 0.99494270067400 | 0.47504260529700 | T | T | T |
| 0.37394894479800 | 0.99495625218800 | 0.80835856417200 | T | T | T |
| 0.70728121221200 | 0.99499452349400 | 0.14169737616800 | T | T | T |
| 0.70727722009300 | 0.99495601288400 | 0.47503599165000 | T | T | T |
| 0.70727839727200 | 0.99496537722000 | 0.80836611938400 | T | T | T |
| 0.20911162242900 | 0.99497235054900 | 0.03129213657120 | T | T | T |
| 0.20870322630600 | 0.99538716463300 | 0.36411906683800 | T | T | T |
| 0.20905160352500 | 0.99497021328300 | 0.69792389786400 | T | T | T |
| 0.54241708790600 | 0.99496477229000 | 0.03125302026010 | T | T | T |
| 0.54238363077500 | 0.99491959739800 | 0.36459090676800 | T | T | T |
| 0.54239535623900 | 0.99494849831500 | 0.69791415052800 | T | T | T |
| 0.87571421731600 | 0.99496515346600 | 0.03123307264030 | T | T | T |
| 0.87567720488700 | 0.99491925404600 | 0.36463028196300 | T | T | T |
| 0.87573015956800 | 0.99495860157900 | 0.69791247618400 | T | T | T |
| 0.20747871289300 | 0.99726111789100 | 0.25089847451900 | T | T | T |
| 0.20733142846200 | 0.99845808955800 | 0.58451444827200 | T | T | T |
| 0.20735593949600 | 0.99840621617600 | 0.91779766248900 | T | T | T |
| 0.54072406783000 | 0.99846258194400 | 0.25116758637000 | T | T | T |
| 0.54068101480800 | 0.99846665180900 | 0.58450171803400 | T | T | T |
| 0.54068149006500 | 0.99846916839900 | 0.91783420915400 | T | T | T |
| 0.87398223617500 | 0.99850878837000 | 0.25115755221300 | T | T | T |
| 0.87400331968100 | 0.99845809904300 | 0.58450646408800 | T | T | T |

|                  |                  |                  |   |   |   |
|------------------|------------------|------------------|---|---|---|
| 0.87399479851600 | 0.99846209826600 | 0.91782608892700 | T | T | T |
| 0.20807278714100 | 0.00595873136862 | 0.13632877698800 | T | T | T |
| 0.20718547009100 | 0.99632398699400 | 0.47475987905800 | T | T | T |
| 0.20721483577100 | 0.99624847419700 | 0.80809903474700 | T | T | T |
| 0.54077529696400 | 0.99626035756700 | 0.14144275879500 | T | T | T |
| 0.54055592728800 | 0.99624390830900 | 0.47478166357700 | T | T | T |
| 0.54055458931500 | 0.99624377600300 | 0.80811513514900 | T | T | T |
| 0.87381721232200 | 0.99628897958400 | 0.14143361792800 | T | T | T |
| 0.87386871471100 | 0.99623393164000 | 0.47478882065800 | T | T | T |
| 0.87387855084000 | 0.99625067030000 | 0.80811087109300 | T | T | T |
| 0.33338345136800 | 0.06680135567650 | 0.08240173589480 | T | T | T |
| 0.33320358913000 | 0.06676847403810 | 0.41599170257400 | T | T | T |
| 0.33319679599700 | 0.06675602400800 | 0.74930509835900 | T | T | T |
| 0.66653079448400 | 0.06676368874500 | 0.08263432377350 | T | T | T |
| 0.66652172191600 | 0.06675847930250 | 0.41597448049900 | T | T | T |
| 0.66652028545500 | 0.06675656852370 | 0.74930494608900 | T | T | T |
| 0.99978222936300 | 0.06672402681720 | 0.08263111612760 | T | T | T |
| 0.99983596942400 | 0.06677054964470 | 0.41599353841600 | T | T | T |
| 0.99985256490800 | 0.06676455420430 | 0.74930635282100 | T | T | T |
| 0.00024906169315 | 0.06654677224760 | 0.30509854841600 | T | T | T |
| 0.00010767098101 | 0.06654290027930 | 0.63819287262600 | T | T | T |
| 0.00006255601345 | 0.06650066508970 | 0.97152019191000 | T | T | T |
| 0.33337031409400 | 0.06646901245280 | 0.30481027793700 | T | T | T |
| 0.33344971651400 | 0.06653695155080 | 0.63818880389300 | T | T | T |
| 0.33350716370200 | 0.06656563313860 | 0.97150806913400 | T | T | T |
| 0.66690529783100 | 0.06654481711470 | 0.30496133864900 | T | T | T |
| 0.66678900663000 | 0.06654542254940 | 0.63819753962100 | T | T | T |
| 0.66677890471000 | 0.06655139770240 | 0.97152350024600 | T | T | T |
| 0.33336610930000 | 0.06628747648970 | 0.19396092094100 | T | T | T |
| 0.33309916081000 | 0.06639426296710 | 0.52731792113100 | T | T | T |

|                  |                  |                  |   |   |   |
|------------------|------------------|------------------|---|---|---|
| 0.33310787563300 | 0.06638409656260 | 0.86064828195200 | T | T | T |
| 0.66643265658600 | 0.06637063036450 | 0.19399770582200 | T | T | T |
| 0.66643262226800 | 0.06639279795580 | 0.52732214702600 | T | T | T |
| 0.66642736643400 | 0.06639406340310 | 0.86065296620600 | T | T | T |
| 0.99971885656500 | 0.06639084995510 | 0.19404911126300 | T | T | T |
| 0.99976274920600 | 0.06639433084900 | 0.52731934493400 | T | T | T |
| 0.99975426277100 | 0.06638021053170 | 0.86064459991400 | T | T | T |
| 0.16663056548000 | 0.06546510627520 | 0.08377231376260 | T | T | T |
| 0.16634969718100 | 0.06692927016790 | 0.41575647437700 | T | T | T |
| 0.16656102078900 | 0.06691883354040 | 0.74925340211100 | T | T | T |
| 0.49991564372100 | 0.06694497021100 | 0.08252465307500 | T | T | T |
| 0.49990377398700 | 0.06692398538500 | 0.41590417888500 | T | T | T |
| 0.49990466512300 | 0.06691565498810 | 0.74924666966200 | T | T | T |
| 0.83317485923600 | 0.06692941658100 | 0.08257082955900 | T | T | T |
| 0.83321218434400 | 0.06691896413510 | 0.41590933302000 | T | T | T |
| 0.83322332988700 | 0.06690045860150 | 0.74924770377600 | T | T | T |
| 0.16674600927000 | 0.06645287453510 | 0.30473017311500 | T | T | T |
| 0.16666882931300 | 0.06578883815170 | 0.63901098438200 | T | T | T |
| 0.16670604727100 | 0.06566946898030 | 0.97236103280800 | T | T | T |
| 0.50004166675100 | 0.06580428819310 | 0.30565977105200 | T | T | T |
| 0.50000957833600 | 0.06579615153960 | 0.63900732299700 | T | T | T |
| 0.50002153296000 | 0.06581426242990 | 0.97233840933400 | T | T | T |
| 0.83331585218500 | 0.06580385588260 | 0.30566136290900 | T | T | T |
| 0.83334782313200 | 0.06580049557960 | 0.63900996167700 | T | T | T |
| 0.83331608113000 | 0.06580462921970 | 0.97233831551100 | T | T | T |
| 0.16611145993800 | 0.06770864146160 | 0.19363624937300 | T | T | T |
| 0.16596800517100 | 0.06903022645370 | 0.52609959698900 | T | T | T |
| 0.16597008274100 | 0.06900627486680 | 0.85941893753800 | T | T | T |
| 0.49942367497800 | 0.06902672620190 | 0.19278524423800 | T | T | T |
| 0.49930740016800 | 0.06901989437750 | 0.52609080523200 | T | T | T |

|                  |                  |                  |   |   |   |
|------------------|------------------|------------------|---|---|---|
| 0.49931493828300 | 0.06901331959620 | 0.85942322497700 | T | T | T |
| 0.83259718644500 | 0.06902461254620 | 0.19275027050400 | T | T | T |
| 0.83264117463300 | 0.06902161415520 | 0.52608836433200 | T | T | T |
| 0.83263725476600 | 0.06901398150760 | 0.85942064257800 | T | T | T |
| 0.08332526121720 | 0.06585846410830 | 0.08320057992310 | T | T | T |
| 0.08348997149970 | 0.06670326972450 | 0.41575299577300 | T | T | T |
| 0.08328421638830 | 0.06671742377040 | 0.74928853689100 | T | T | T |
| 0.41695349891900 | 0.06674445925110 | 0.08254174605680 | T | T | T |
| 0.41665026458900 | 0.06672240885720 | 0.41595071044000 | T | T | T |
| 0.41663741249500 | 0.06671104797820 | 0.74928153594200 | T | T | T |
| 0.74995760696300 | 0.06672431232440 | 0.08260293065690 | T | T | T |
| 0.74996129290900 | 0.06671673940680 | 0.41594800711800 | T | T | T |
| 0.74995879659900 | 0.06671151757160 | 0.74928031389400 | T | T | T |
| 0.08335980747080 | 0.06660152354150 | 0.30462268421900 | T | T | T |
| 0.08316849949670 | 0.06636361432880 | 0.63808687645400 | T | T | T |
| 0.08310580093460 | 0.06626300105750 | 0.97141802977500 | T | T | T |
| 0.41656992264000 | 0.06638291715440 | 0.30475227589000 | T | T | T |
| 0.41650913322900 | 0.06636444352710 | 0.63807801113900 | T | T | T |
| 0.41653928608400 | 0.06638186081690 | 0.97139984239900 | T | T | T |
| 0.74983816378300 | 0.06636676438280 | 0.30473755008600 | T | T | T |
| 0.74984088024500 | 0.06636592646560 | 0.63807962876700 | T | T | T |
| 0.74982903108600 | 0.06637522894570 | 0.97141116985000 | T | T | T |
| 0.08320951583540 | 0.06635255855820 | 0.19373955504400 | T | T | T |
| 0.08260251109210 | 0.06635794812930 | 0.52722647596000 | T | T | T |
| 0.08260042381820 | 0.06633570755760 | 0.86054797006300 | T | T | T |
| 0.41612590794600 | 0.06635017548760 | 0.19387113348100 | T | T | T |
| 0.41594207242600 | 0.06634988596360 | 0.52722264058100 | T | T | T |
| 0.41594948213100 | 0.06634240783910 | 0.86055796706200 | T | T | T |
| 0.74926631336300 | 0.06634821627280 | 0.19388394064000 | T | T | T |
| 0.74927510925200 | 0.06635149697530 | 0.52722321112600 | T | T | T |

|                  |                  |                  |   |   |   |
|------------------|------------------|------------------|---|---|---|
| 0.74926759514300 | 0.06634929063500 | 0.86055585920700 | T | T | T |
| 0.25048582403700 | 0.06776609077490 | 0.08187585601950 | T | T | T |
| 0.24986227364000 | 0.06620077085440 | 0.41636535304500 | T | T | T |
| 0.24992629147700 | 0.06622132578530 | 0.74973472104000 | T | T | T |
| 0.58328526392300 | 0.06624464471250 | 0.08305856141750 | T | T | T |
| 0.58326160598000 | 0.06622428194150 | 0.41639916731700 | T | T | T |
| 0.58326381166800 | 0.06622132937970 | 0.74973643672000 | T | T | T |
| 0.91650219201300 | 0.06622467303530 | 0.08305282300060 | T | T | T |
| 0.91657021653200 | 0.06623974914580 | 0.41641140137100 | T | T | T |
| 0.91659078809200 | 0.06623637914280 | 0.74973091465000 | T | T | T |
| 0.24994755329000 | 0.06642975636800 | 0.30455570997600 | T | T | T |
| 0.25020193008400 | 0.06637158433720 | 0.63816879718200 | T | T | T |
| 0.25027168126300 | 0.06635113089060 | 0.97146350626100 | T | T | T |
| 0.58343164531900 | 0.06638019804090 | 0.30494170251300 | T | T | T |
| 0.58353146112300 | 0.06637862588480 | 0.63817554244000 | T | T | T |
| 0.58354194698700 | 0.06638329281480 | 0.97150146963800 | T | T | T |
| 0.91664346682800 | 0.06637108180970 | 0.30502544533800 | T | T | T |
| 0.91687479869200 | 0.06637512630660 | 0.63816060578300 | T | T | T |
| 0.91682171795500 | 0.06637398295430 | 0.97150059607800 | T | T | T |
| 0.25041187188500 | 0.06767942559510 | 0.19359906105900 | T | T | T |
| 0.24982975460800 | 0.06734349075700 | 0.52655707092500 | T | T | T |
| 0.24983505653200 | 0.06733374653650 | 0.85988492074200 | T | T | T |
| 0.58318442641600 | 0.06732027073170 | 0.19324503752800 | T | T | T |
| 0.58316850283900 | 0.06734139730840 | 0.52655796612900 | T | T | T |
| 0.58316944492700 | 0.06734124218510 | 0.85988913378300 | T | T | T |
| 0.91642066541000 | 0.06730345467640 | 0.19324758660400 | T | T | T |
| 0.91649732022900 | 0.06734406406220 | 0.52655774949000 | T | T | T |
| 0.91649595113900 | 0.06733008647910 | 0.85989035475200 | T | T | T |
| 0.04166666667330 | 0.13043999673400 | 0.02777666599470 | F | F | F |
| 0.04166666667330 | 0.13043999673400 | 0.36110999932900 | F | F | F |



|                  |                  |                  |   |   |   |
|------------------|------------------|------------------|---|---|---|
| 0.04166666667330 | 0.13043999673400 | 0.69444333266100 | F | F | F |
| 0.37500000000700 | 0.13043999673400 | 0.02777666599470 | F | F | F |
| 0.37500000000700 | 0.13043999673400 | 0.36110999932900 | F | F | F |
| 0.37500000000700 | 0.13043999673400 | 0.69444333266100 | F | F | F |
| 0.70833333334100 | 0.13043999673400 | 0.02777666599470 | F | F | F |
| 0.70833333334100 | 0.13043999673400 | 0.36110999932900 | F | F | F |
| 0.70833333334100 | 0.13043999673400 | 0.69444333266100 | F | F | F |
| 0.04166666667330 | 0.13043999673400 | 0.24999999994900 | F | F | F |
| 0.04166666667330 | 0.13043999673400 | 0.58333333328300 | F | F | F |
| 0.04166666667330 | 0.13043999673400 | 0.91666666661700 | F | F | F |
| 0.37500000000700 | 0.13043999673400 | 0.24999999994900 | F | F | F |
| 0.37500000000700 | 0.13043999673400 | 0.58333333328300 | F | F | F |
| 0.37500000000700 | 0.13043999673400 | 0.91666666661700 | F | F | F |
| 0.70833333334100 | 0.13043999673400 | 0.24999999994900 | F | F | F |
| 0.70833333334100 | 0.13043999673400 | 0.58333333328300 | F | F | F |
| 0.70833333334100 | 0.13043999673400 | 0.91666666661700 | F | F | F |
| 0.04166666667330 | 0.13043999673400 | 0.13888999819000 | F | F | F |
| 0.04166666667330 | 0.13043999673400 | 0.47222333152400 | F | F | F |
| 0.04166666667330 | 0.13043999673400 | 0.80555666485600 | F | F | F |
| 0.37500000000700 | 0.13043999673400 | 0.13888999819000 | F | F | F |
| 0.37500000000700 | 0.13043999673400 | 0.47222333152400 | F | F | F |
| 0.37500000000700 | 0.13043999673400 | 0.80555666485600 | F | F | F |
| 0.70833333334100 | 0.13043999673400 | 0.13888999819000 | F | F | F |
| 0.70833333334100 | 0.13043999673400 | 0.47222333152400 | F | F | F |
| 0.70833333334100 | 0.13043999673400 | 0.80555666485600 | F | F | F |
| 0.20833333332800 | 0.13043999673400 | 0.02777666599470 | F | F | F |
| 0.20833333332800 | 0.13043999673400 | 0.36110999932900 | F | F | F |
| 0.20833333332800 | 0.13043999673400 | 0.69444333266100 | F | F | F |
| 0.54166666666100 | 0.13043999673400 | 0.02777666599470 | F | F | F |
| 0.54166666666100 | 0.13043999673400 | 0.36110999932900 | F | F | F |

|                  |                  |                  |   |   |   |
|------------------|------------------|------------------|---|---|---|
| 0.54166666666100 | 0.13043999673400 | 0.69444333266100 | F | F | F |
| 0.87499999999500 | 0.13043999673400 | 0.02777666599470 | F | F | F |
| 0.87499999999500 | 0.13043999673400 | 0.36110999932900 | F | F | F |
| 0.87499999999500 | 0.13043999673400 | 0.69444333266100 | F | F | F |
| 0.2083333332800  | 0.13043999673400 | 0.2499999994900  | F | F | F |
| 0.2083333332800  | 0.13043999673400 | 0.5833333328300  | F | F | F |
| 0.2083333332800  | 0.13043999673400 | 0.9166666661700  | F | F | F |
| 0.54166666666100 | 0.13043999673400 | 0.2499999994900  | F | F | F |
| 0.54166666666100 | 0.13043999673400 | 0.5833333328300  | F | F | F |
| 0.54166666666100 | 0.13043999673400 | 0.9166666661700  | F | F | F |
| 0.87499999999500 | 0.13043999673400 | 0.2499999994900  | F | F | F |
| 0.87499999999500 | 0.13043999673400 | 0.5833333328300  | F | F | F |
| 0.87499999999500 | 0.13043999673400 | 0.9166666661700  | F | F | F |
| 0.2083333332800  | 0.13043999673400 | 0.13888999819000 | F | F | F |
| 0.2083333332800  | 0.13043999673400 | 0.47222333152400 | F | F | F |
| 0.2083333332800  | 0.13043999673400 | 0.80555666485600 | F | F | F |
| 0.54166666666100 | 0.13043999673400 | 0.13888999819000 | F | F | F |
| 0.54166666666100 | 0.13043999673400 | 0.47222333152400 | F | F | F |
| 0.54166666666100 | 0.13043999673400 | 0.80555666485600 | F | F | F |
| 0.87499999999500 | 0.13043999673400 | 0.13888999819000 | F | F | F |
| 0.87499999999500 | 0.13043999673400 | 0.47222333152400 | F | F | F |
| 0.87499999999500 | 0.13043999673400 | 0.80555666485600 | F | F | F |
| 0.1250000000200  | 0.13043999673400 | 0.02777666599470 | F | F | F |
| 0.1250000000200  | 0.13043999673400 | 0.36110999932900 | F | F | F |
| 0.1250000000200  | 0.13043999673400 | 0.69444333266100 | F | F | F |
| 0.4583333333400  | 0.13043999673400 | 0.02777666599470 | F | F | F |
| 0.4583333333400  | 0.13043999673400 | 0.36110999932900 | F | F | F |
| 0.4583333333400  | 0.13043999673400 | 0.69444333266100 | F | F | F |
| 0.7916666666800  | 0.13043999673400 | 0.02777666599470 | F | F | F |
| 0.7916666666800  | 0.13043999673400 | 0.36110999932900 | F | F | F |

|                  |                  |                  |   |   |   |
|------------------|------------------|------------------|---|---|---|
| 0.79166666666800 | 0.13043999673400 | 0.69444333266100 | F | F | F |
| 0.12500000000200 | 0.13043999673400 | 0.24999999994900 | F | F | F |
| 0.12500000000200 | 0.13043999673400 | 0.58333333328300 | F | F | F |
| 0.12500000000200 | 0.13043999673400 | 0.91666666661700 | F | F | F |
| 0.45833333333400 | 0.13043999673400 | 0.24999999994900 | F | F | F |
| 0.45833333333400 | 0.13043999673400 | 0.58333333328300 | F | F | F |
| 0.45833333333400 | 0.13043999673400 | 0.91666666661700 | F | F | F |
| 0.79166666666800 | 0.13043999673400 | 0.24999999994900 | F | F | F |
| 0.79166666666800 | 0.13043999673400 | 0.58333333328300 | F | F | F |
| 0.79166666666800 | 0.13043999673400 | 0.91666666661700 | F | F | F |
| 0.12500000000200 | 0.13043999673400 | 0.13888999819000 | F | F | F |
| 0.12500000000200 | 0.13043999673400 | 0.47222333152400 | F | F | F |
| 0.12500000000200 | 0.13043999673400 | 0.80555666485600 | F | F | F |
| 0.45833333333400 | 0.13043999673400 | 0.13888999819000 | F | F | F |
| 0.45833333333400 | 0.13043999673400 | 0.47222333152400 | F | F | F |
| 0.45833333333400 | 0.13043999673400 | 0.80555666485600 | F | F | F |
| 0.79166666666800 | 0.13043999673400 | 0.13888999819000 | F | F | F |
| 0.79166666666800 | 0.13043999673400 | 0.47222333152400 | F | F | F |
| 0.79166666666800 | 0.13043999673400 | 0.80555666485600 | F | F | F |
| 0.29166666669900 | 0.13043999673400 | 0.02777666599470 | F | F | F |
| 0.29166666669900 | 0.13043999673400 | 0.36110999932900 | F | F | F |
| 0.29166666669900 | 0.13043999673400 | 0.69444333266100 | F | F | F |
| 0.62500000003100 | 0.13043999673400 | 0.02777666599470 | F | F | F |
| 0.62500000003100 | 0.13043999673400 | 0.36110999932900 | F | F | F |
| 0.62500000003100 | 0.13043999673400 | 0.69444333266100 | F | F | F |
| 0.95833333336500 | 0.13043999673400 | 0.02777666599470 | F | F | F |
| 0.95833333336500 | 0.13043999673400 | 0.36110999932900 | F | F | F |
| 0.95833333336500 | 0.13043999673400 | 0.69444333266100 | F | F | F |
| 0.29166666669900 | 0.13043999673400 | 0.24999999994900 | F | F | F |
| 0.29166666669900 | 0.13043999673400 | 0.58333333328300 | F | F | F |

|                  |                  |                  |   |   |   |
|------------------|------------------|------------------|---|---|---|
| 0.29166666669900 | 0.13043999673400 | 0.91666666661700 | F | F | F |
| 0.62500000003100 | 0.13043999673400 | 0.24999999994900 | F | F | F |
| 0.62500000003100 | 0.13043999673400 | 0.58333333328300 | F | F | F |
| 0.62500000003100 | 0.13043999673400 | 0.91666666661700 | F | F | F |
| 0.95833333336500 | 0.13043999673400 | 0.24999999994900 | F | F | F |
| 0.95833333336500 | 0.13043999673400 | 0.58333333328300 | F | F | F |
| 0.95833333336500 | 0.13043999673400 | 0.91666666661700 | F | F | F |
| 0.29166666669900 | 0.13043999673400 | 0.13888999819000 | F | F | F |
| 0.29166666669900 | 0.13043999673400 | 0.47222333152400 | F | F | F |
| 0.29166666669900 | 0.13043999673400 | 0.80555666485600 | F | F | F |
| 0.62500000003100 | 0.13043999673400 | 0.13888999819000 | F | F | F |
| 0.62500000003100 | 0.13043999673400 | 0.47222333152400 | F | F | F |
| 0.62500000003100 | 0.13043999673400 | 0.80555666485600 | F | F | F |
| 0.95833333336500 | 0.13043999673400 | 0.13888999819000 | F | F | F |
| 0.95833333336500 | 0.13043999673400 | 0.47222333152400 | F | F | F |
| 0.95833333336500 | 0.13043999673400 | 0.80555666485600 | F | F | F |
| 0.00008442249941 | 0.19462334700800 | 0.08303283239210 | T | T | T |
| 0.00022695738210 | 0.19465325086600 | 0.41649351867200 | T | T | T |
| 0.00027061721107 | 0.19466795208000 | 0.74980324882400 | T | T | T |
| 0.33390291211800 | 0.19406919145600 | 0.08251623961580 | T | T | T |
| 0.33355725926400 | 0.19465254288900 | 0.41648815539900 | T | T | T |
| 0.33354541546600 | 0.19467424435400 | 0.74980068655700 | T | T | T |
| 0.66686030638600 | 0.19466309999400 | 0.08313884243090 | T | T | T |
| 0.66688816899200 | 0.19466269553900 | 0.41646339691300 | T | T | T |
| 0.66688943979900 | 0.19466730645400 | 0.74979965132100 | T | T | T |
| 0.99999386177800 | 0.19428702700500 | 0.30487118852600 | T | T | T |
| 0.00005817167459 | 0.19431220167500 | 0.63813342844200 | T | T | T |
| 0.00000665460506 | 0.19433337462700 | 0.97145740334800 | T | T | T |
| 0.33329349975800 | 0.19438693299900 | 0.30475690844700 | T | T | T |
| 0.33339781847700 | 0.19431973501900 | 0.63812818699600 | T | T | T |

|                  |                  |                  |   |   |   |
|------------------|------------------|------------------|---|---|---|
| 0.33346860847700 | 0.19431783478000 | 0.97144063345900 | T | T | T |
| 0.66670918248400 | 0.19430654352100 | 0.30479555714400 | T | T | T |
| 0.66673266710000 | 0.19431497677200 | 0.63813524917100 | T | T | T |
| 0.66672592961500 | 0.19431064434000 | 0.97146474680300 | T | T | T |
| 0.33340313046800 | 0.19449787829200 | 0.19395030748100 | T | T | T |
| 0.33325895647600 | 0.19435432466400 | 0.52736474120700 | T | T | T |
| 0.33326918355200 | 0.19436914370300 | 0.86069376396900 | T | T | T |
| 0.66658914766000 | 0.19436503473700 | 0.19404070306300 | T | T | T |
| 0.66659322373800 | 0.19435948175700 | 0.52736807607900 | T | T | T |
| 0.66658799285200 | 0.19436013290200 | 0.86069811113200 | T | T | T |
| 0.99983920350400 | 0.19431151817100 | 0.19406306439500 | T | T | T |
| 0.99992362815400 | 0.19434519982000 | 0.52736940129600 | T | T | T |
| 0.99991623707500 | 0.19436316450600 | 0.86069418877300 | T | T | T |
| 0.16686102104800 | 0.19625039580900 | 0.08439421545150 | T | T | T |
| 0.16695808299700 | 0.19398340530100 | 0.41594176869000 | T | T | T |
| 0.16696639353400 | 0.19401164708100 | 0.74921317590900 | T | T | T |
| 0.50031351507300 | 0.19400149741900 | 0.08255708333380 | T | T | T |
| 0.50031876141500 | 0.19400734795100 | 0.41586720687600 | T | T | T |
| 0.50027721768900 | 0.19401593891200 | 0.74922348597200 | T | T | T |
| 0.83346941397800 | 0.19400828772700 | 0.08257223327910 | T | T | T |
| 0.83391806159700 | 0.19398728240700 | 0.41576544340400 | T | T | T |
| 0.83397499159900 | 0.19398584642800 | 0.74909157293600 | T | T | T |
| 0.16680631498500 | 0.19446771426100 | 0.30465830761400 | T | T | T |
| 0.16668946990600 | 0.19457995454800 | 0.63801443689200 | T | T | T |
| 0.16655002643500 | 0.19468983699400 | 0.97151444280400 | T | T | T |
| 0.50004523366900 | 0.19457362804400 | 0.30466859326400 | T | T | T |
| 0.50002165672000 | 0.19457459576900 | 0.63801292488600 | T | T | T |
| 0.50004160818500 | 0.19456850416700 | 0.97133764364200 | T | T | T |
| 0.83331960859000 | 0.19458110267800 | 0.30467936723000 | T | T | T |
| 0.83337187395100 | 0.19459204309300 | 0.63801804348600 | T | T | T |

|                  |                  |                  |   |   |   |
|------------------|------------------|------------------|---|---|---|
| 0.83333342682700 | 0.19456268414100 | 0.97133637864200 | T | T | T |
| 0.16624618471800 | 0.19356270385600 | 0.19365018492600 | T | T | T |
| 0.16669286237700 | 0.19302598019500 | 0.52678908483000 | T | T | T |
| 0.16669454456500 | 0.19305908263900 | 0.86010654458900 | T | T | T |
| 0.50007682060000 | 0.19302898976900 | 0.19344075367600 | T | T | T |
| 0.50003357573200 | 0.19303649186500 | 0.52677893659700 | T | T | T |
| 0.50004245483800 | 0.19304276733100 | 0.86011061427000 | T | T | T |
| 0.83330418345100 | 0.19302339837700 | 0.19343915709000 | T | T | T |
| 0.83336625672800 | 0.19303471451700 | 0.52677788448300 | T | T | T |
| 0.83336276996000 | 0.19304242166600 | 0.86011013263400 | T | T | T |
| 0.08357320858560 | 0.19503520216100 | 0.08319927920520 | T | T | T |
| 0.08356395427440 | 0.19472672418000 | 0.41643865379700 | T | T | T |
| 0.08360457393120 | 0.19476074265500 | 0.74973437614800 | T | T | T |
| 0.41721130040500 | 0.19471993439000 | 0.08308463671730 | T | T | T |
| 0.41694685518300 | 0.19475321499600 | 0.41639687014600 | T | T | T |
| 0.41693001991900 | 0.19476920515400 | 0.74973190741300 | T | T | T |
| 0.75022302572800 | 0.19475452455600 | 0.08306364276660 | T | T | T |
| 0.75030233829000 | 0.19475735936100 | 0.41639374486000 | T | T | T |
| 0.75031823619000 | 0.19476027096900 | 0.74973131324300 | T | T | T |
| 0.08335647597920 | 0.19422035543400 | 0.30462442185600 | T | T | T |
| 0.08337604392090 | 0.19446914599600 | 0.63781379468800 | T | T | T |
| 0.08331167706530 | 0.19451467288600 | 0.97114147846900 | T | T | T |
| 0.41678320511900 | 0.19445352146500 | 0.30449108511200 | T | T | T |
| 0.41671498362500 | 0.19447456029200 | 0.63780263136700 | T | T | T |
| 0.41674627030200 | 0.19446283415800 | 0.97111996115000 | T | T | T |
| 0.75004934846500 | 0.19446802237800 | 0.30446844584000 | T | T | T |
| 0.75005011102700 | 0.19447564390500 | 0.63780557153500 | T | T | T |
| 0.75003680586700 | 0.19446623442600 | 0.97113573517800 | T | T | T |
| 0.08351651300080 | 0.19418481950600 | 0.19378523672800 | T | T | T |
| 0.08326455812250 | 0.19431047537400 | 0.52706681073200 | T | T | T |

|                  |                  |                  |   |   |   |
|------------------|------------------|------------------|---|---|---|
| 0.08326202484270 | 0.19432487955600 | 0.86038346738500 | T | T | T |
| 0.41665988061200 | 0.19436908492000 | 0.19365378799000 | T | T | T |
| 0.41660562021300 | 0.19431881433600 | 0.52706115004800 | T | T | T |
| 0.41661503089200 | 0.19432306995100 | 0.86039455919500 | T | T | T |
| 0.74992289391700 | 0.19431504659100 | 0.19372063158900 | T | T | T |
| 0.74993850038800 | 0.19432075336800 | 0.52706253737500 | T | T | T |
| 0.74993313849800 | 0.19432373460900 | 0.86039270467900 | T | T | T |
| 0.25029275401800 | 0.19413557809500 | 0.08243205995010 | T | T | T |
| 0.25024403679000 | 0.19472138051500 | 0.41647294403500 | T | T | T |
| 0.25026370142700 | 0.19476429978400 | 0.74978360654100 | T | T | T |
| 0.58356652964000 | 0.19474845860500 | 0.08310739957570 | T | T | T |
| 0.58360493936100 | 0.19475521221000 | 0.41644569149200 | T | T | T |
| 0.58357491692200 | 0.19475698340600 | 0.74977426582800 | T | T | T |
| 0.91673189913700 | 0.19473369338200 | 0.08304990352850 | T | T | T |
| 0.91717983967800 | 0.19475998904600 | 0.41656678118800 | T | T | T |
| 0.91724789596900 | 0.19478415067000 | 0.74990834703100 | T | T | T |
| 0.24989972572400 | 0.19447195148200 | 0.30446737520200 | T | T | T |
| 0.24997145112700 | 0.19449076491400 | 0.63784095732200 | T | T | T |
| 0.25019035750300 | 0.19450943358200 | 0.97127024907900 | T | T | T |
| 0.58331879002400 | 0.19447576839100 | 0.30450662994500 | T | T | T |
| 0.58330875050000 | 0.19448767522400 | 0.63784909511700 | T | T | T |
| 0.58331013572600 | 0.19448609470500 | 0.97117319446500 | T | T | T |
| 0.91660304139000 | 0.19445577205700 | 0.30452773295700 | T | T | T |
| 0.91664313454400 | 0.19447139002100 | 0.63782683777400 | T | T | T |
| 0.91659696921400 | 0.19448938102400 | 0.97116666297700 | T | T | T |
| 0.25044208656800 | 0.19410816233100 | 0.19401987450700 | T | T | T |
| 0.24995608892700 | 0.19433567094700 | 0.52702764726700 | T | T | T |
| 0.24996170628800 | 0.19437729782000 | 0.86036456783100 | T | T | T |
| 0.58329722273600 | 0.19433968044700 | 0.19369736600700 | T | T | T |
| 0.58329541509900 | 0.19434628593600 | 0.52702874999000 | T | T | T |

|                  |                  |                  |   |   |   |
|------------------|------------------|------------------|---|---|---|
| 0.58329781937800 | 0.19434595034400 | 0.86035761810300 | T | T | T |
| 0.91652498426600 | 0.19430910238200 | 0.19370014749600 | T | T | T |
| 0.91662620222700 | 0.19433883309800 | 0.52702586388700 | T | T | T |
| 0.91662413895100 | 0.19434839166900 | 0.86035894589600 | T | T | T |
| 0.12528718770600 | 0.26510431739600 | 0.03060201358910 | T | T | T |
| 0.12537915534300 | 0.26500305175800 | 0.36383360111400 | T | T | T |
| 0.12536710526300 | 0.26522762948900 | 0.69706673937600 | T | T | T |
| 0.45873611644100 | 0.26524538397500 | 0.03037134237580 | T | T | T |
| 0.45871351718500 | 0.26524659405000 | 0.36370762859400 | T | T | T |
| 0.45870059708100 | 0.26525628457800 | 0.69705436237800 | T | T | T |
| 0.79200553463100 | 0.26526097739200 | 0.03037305323550 | T | T | T |
| 0.79203746241900 | 0.26522906475100 | 0.36371566411800 | T | T | T |
| 0.79206331831900 | 0.26522353062000 | 0.69706736223900 | T | T | T |
| 0.12463363760600 | 0.26387246783900 | 0.25205668399800 | T | T | T |
| 0.12441892769200 | 0.26458217192300 | 0.58450177805500 | T | T | T |
| 0.12441791100300 | 0.26455561759600 | 0.91780144140600 | T | T | T |
| 0.45779358655700 | 0.26453758390900 | 0.25111399235600 | T | T | T |
| 0.45776760299900 | 0.26459672140500 | 0.58448895393800 | T | T | T |
| 0.45777429021200 | 0.26459120354000 | 0.91781125044700 | T | T | T |
| 0.79106676399900 | 0.26457154369700 | 0.25113272134100 | T | T | T |
| 0.79109128468900 | 0.26459212436200 | 0.58448911613900 | T | T | T |
| 0.79108538170500 | 0.26458342301900 | 0.91781480883100 | T | T | T |
| 0.12491081177200 | 0.26581485501800 | 0.14225348439200 | T | T | T |
| 0.12606417000200 | 0.26513135178000 | 0.47496787607000 | T | T | T |
| 0.12606895871800 | 0.26514689045500 | 0.80824216829900 | T | T | T |
| 0.45944926262100 | 0.26512588851700 | 0.14158108193800 | T | T | T |
| 0.45941835031800 | 0.26515466767800 | 0.47492578420000 | T | T | T |
| 0.45940867398100 | 0.26515052316800 | 0.80826238948800 | T | T | T |
| 0.79266011603400 | 0.26515105696600 | 0.14159600411900 | T | T | T |
| 0.79275605762000 | 0.26511772915200 | 0.47489878742000 | T | T | T |



|                  |                  |                  |   |   |   |
|------------------|------------------|------------------|---|---|---|
| 0.79276863695200 | 0.26509671314700 | 0.80821864394600 | T | T | T |
| 0.29211352567400 | 0.26503929810700 | 0.03039920654090 | T | T | T |
| 0.29205142553700 | 0.26512855541400 | 0.36383500101400 | T | T | T |
| 0.29205595868500 | 0.26521065407600 | 0.69708659039400 | T | T | T |
| 0.62539189230200 | 0.26518576104900 | 0.03042638407320 | T | T | T |
| 0.62539772749300 | 0.26521326645500 | 0.36373777436700 | T | T | T |
| 0.62539600756000 | 0.26521582784800 | 0.69708330226100 | T | T | T |
| 0.95870025621400 | 0.26512156726700 | 0.03038647100070 | T | T | T |
| 0.95871889847400 | 0.26520556465300 | 0.36379558296900 | T | T | T |
| 0.95875630421000 | 0.26521174950900 | 0.69707304903800 | T | T | T |
| 0.29106468624000 | 0.26633892921900 | 0.25276643025600 | T | T | T |
| 0.29113180707600 | 0.26625888729300 | 0.58642954449000 | T | T | T |
| 0.29114358433200 | 0.26624433926300 | 0.91973041970400 | T | T | T |
| 0.62447092998800 | 0.26622103499800 | 0.25310100549500 | T | T | T |
| 0.62446903237100 | 0.26622155423100 | 0.58643736522200 | T | T | T |
| 0.62447053153400 | 0.26622929187100 | 0.91976180569300 | T | T | T |
| 0.95779164612500 | 0.26606088331100 | 0.25311829323400 | T | T | T |
| 0.95780622202200 | 0.26624185436800 | 0.58643153164100 | T | T | T |
| 0.95779879322200 | 0.26622699913800 | 0.91974404118600 | T | T | T |
| 0.29381154950300 | 0.26645787114800 | 0.14209773129600 | T | T | T |
| 0.29272214392500 | 0.26625933680400 | 0.47597992099800 | T | T | T |
| 0.29272259058600 | 0.26625265629900 | 0.80929014869300 | T | T | T |
| 0.62604440518300 | 0.26617743489100 | 0.14264768879700 | T | T | T |
| 0.62606051753600 | 0.26625284507800 | 0.47596619556000 | T | T | T |
| 0.62605912223600 | 0.26625153005200 | 0.80929301392300 | T | T | T |
| 0.95912557536700 | 0.26594064351500 | 0.14258223081400 | T | T | T |
| 0.95941926949400 | 0.26629746531600 | 0.47601463019700 | T | T | T |
| 0.95944055982900 | 0.26630673329100 | 0.80933558143500 | T | T | T |
| 0.04203351461150 | 0.26531509421600 | 0.03071224348830 | T | T | T |
| 0.04205962520150 | 0.26539769768800 | 0.36415969489100 | T | T | T |

|                  |                  |                  |   |   |   |
|------------------|------------------|------------------|---|---|---|
| 0.04208085475300 | 0.26543645002400 | 0.69740216593000 | T | T | T |
| 0.37549668630100 | 0.26549652355900 | 0.03067117447060 | T | T | T |
| 0.37539596503400 | 0.26539570387800 | 0.36407142498400 | T | T | T |
| 0.37539883772200 | 0.26544669638200 | 0.69739683263700 | T | T | T |
| 0.70871282441400 | 0.26543004141700 | 0.03073331793940 | T | T | T |
| 0.70873079584400 | 0.26542950785200 | 0.36405131224000 | T | T | T |
| 0.70874300835300 | 0.26544070710900 | 0.69739793501100 | T | T | T |
| 0.04090149025750 | 0.26562264961300 | 0.25314282207000 | T | T | T |
| 0.04066698982630 | 0.26617164552000 | 0.58652467111300 | T | T | T |
| 0.04065426451980 | 0.26617066692000 | 0.91980514731600 | T | T | T |
| 0.37408106138100 | 0.26592648385800 | 0.25318102024600 | T | T | T |
| 0.37400057891900 | 0.26620817690400 | 0.58650865079100 | T | T | T |
| 0.37400771142700 | 0.26620876911300 | 0.91981620451300 | T | T | T |
| 0.70732313194500 | 0.26611401471200 | 0.25318698556500 | T | T | T |
| 0.70733082075200 | 0.26618234459400 | 0.58651277255400 | T | T | T |
| 0.70732850402100 | 0.26617714536600 | 0.91984065344100 | T | T | T |
| 0.04155909986420 | 0.26576428315700 | 0.14259242931000 | T | T | T |
| 0.04216766200560 | 0.26622346641100 | 0.47601187443300 | T | T | T |
| 0.04217885841140 | 0.26623506075400 | 0.80930886926200 | T | T | T |
| 0.37538266148500 | 0.26594069950300 | 0.14211032216800 | T | T | T |
| 0.37551303453200 | 0.26624378880600 | 0.47599254486300 | T | T | T |
| 0.37550669454900 | 0.26622877896700 | 0.80931495286200 | T | T | T |
| 0.70880071683800 | 0.26617766052700 | 0.14266039730400 | T | T | T |
| 0.70883786247500 | 0.26622177077500 | 0.47598210173300 | T | T | T |
| 0.70884270683800 | 0.26621420144800 | 0.80931510191100 | T | T | T |
| 0.20877983668200 | 0.26545536094100 | 0.03074864644780 | T | T | T |
| 0.20875525430900 | 0.26539785236000 | 0.36410157886600 | T | T | T |
| 0.20874997454500 | 0.26553124813400 | 0.69733838556900 | T | T | T |
| 0.54209647088300 | 0.26553723989500 | 0.03066590462650 | T | T | T |
| 0.54210062206800 | 0.26554982614200 | 0.36397251563700 | T | T | T |

|                  |                  |                  |   |   |   |
|------------------|------------------|------------------|---|---|---|
| 0.54208091895400 | 0.26555263905500 | 0.69732746614400 | T | T | T |
| 0.87537055754200 | 0.26552068967400 | 0.03064563619420 | T | T | T |
| 0.87549095725300 | 0.26553637047000 | 0.36399183577300 | T | T | T |
| 0.87553817757100 | 0.26555186327000 | 0.69733117420300 | T | T | T |
| 0.20736238793400 | 0.26518748694100 | 0.25116414288900 | T | T | T |
| 0.20736946803600 | 0.26507439822300 | 0.58471313572700 | T | T | T |
| 0.20739042121600 | 0.26485457443300 | 0.91817681430700 | T | T | T |
| 0.54075089746900 | 0.26503300796100 | 0.25135575352300 | T | T | T |
| 0.54071803693500 | 0.26505490538300 | 0.58470832133800 | T | T | T |
| 0.54072035943300 | 0.26506266732000 | 0.91803105167500 | T | T | T |
| 0.87403499964900 | 0.26496879385700 | 0.25136230282900 | T | T | T |
| 0.87404085382700 | 0.26507266857000 | 0.58470360645200 | T | T | T |
| 0.87403263705500 | 0.26506091907000 | 0.91802824573700 | T | T | T |
| 0.20850673722500 | 0.25685669852400 | 0.13674304525700 | T | T | T |
| 0.20875067585900 | 0.26507354602100 | 0.47494418508100 | T | T | T |
| 0.20875646743100 | 0.26507738892900 | 0.80822763109700 | T | T | T |
| 0.54212551241100 | 0.26505103526800 | 0.14157770594700 | T | T | T |
| 0.54209868171800 | 0.26507916571200 | 0.47490831015700 | T | T | T |
| 0.54209868084700 | 0.26508287208800 | 0.80824087192800 | T | T | T |
| 0.87529909644800 | 0.26502587268100 | 0.14157117392600 | T | T | T |
| 0.87540445986700 | 0.26508894189100 | 0.47491418160200 | T | T | T |
| 0.87541387631000 | 0.26507500897800 | 0.80823977036400 | T | T | T |
| 0.19420993573500 | 0.38029384505900 | 0.22236610825700 | T | T | T |
| 0.19677588184800 | 0.37781159280500 | 0.55754903851200 | T | T | T |
| 0.19678125814800 | 0.37780852754800 | 0.89095531281500 | T | T | T |
| 0.53008840347100 | 0.37781507493300 | 0.22424502675300 | T | T | T |
| 0.53010040908200 | 0.37779317487700 | 0.55757231677800 | T | T | T |
| 0.53010430393900 | 0.37780324421600 | 0.89091828805300 | T | T | T |
| 0.86354064876800 | 0.37781822954800 | 0.22427246186800 | T | T | T |
| 0.86346659643700 | 0.37779848941600 | 0.55757668262900 | T | T | T |

|                  |                  |                  |   |   |   |
|------------------|------------------|------------------|---|---|---|
| 0.86348418895200 | 0.37779164661100 | 0.89094096055300 | T | T | T |
| 0.22925085660300 | 0.34257468302400 | 0.23959356048900 | T | T | T |
| 0.22834720797700 | 0.33817949471100 | 0.57514087173100 | T | T | T |
| 0.22823411949700 | 0.33807896501700 | 0.90847554304300 | T | T | T |
| 0.56160511013500 | 0.33817225046900 | 0.24185219310200 | T | T | T |
| 0.56163288033100 | 0.33811618151700 | 0.57513556751800 | T | T | T |
| 0.56164068432800 | 0.33810437887400 | 0.90844043842500 | T | T | T |
| 0.89510230598400 | 0.33827155648900 | 0.24192298384500 | T | T | T |
| 0.89502503393300 | 0.33813480418800 | 0.57511438737400 | T | T | T |
| 0.89502079633500 | 0.33811100090800 | 0.90842950367500 | T | T | T |
| 0.16602084682200 | 0.37283643361400 | 0.23859010965100 | T | T | T |
| 0.16713435995300 | 0.36557493733500 | 0.57473022928800 | T | T | T |
| 0.16711030193900 | 0.36553662584800 | 0.90816682179200 | T | T | T |
| 0.50042735238800 | 0.36558133143600 | 0.24143736352100 | T | T | T |
| 0.50045159320300 | 0.36554622510900 | 0.57476697435100 | T | T | T |
| 0.50044825976400 | 0.36554466688500 | 0.90811319044400 | T | T | T |
| 0.83386338793800 | 0.36559221154700 | 0.24141348232500 | T | T | T |
| 0.83381247668300 | 0.36555132624800 | 0.57475471030700 | T | T | T |
| 0.83381435358500 | 0.36555115863200 | 0.90811478101000 | T | T | T |
| 0.16710296183600 | 0.33716233401600 | 0.20642772497700 | T | T | T |
| 0.17077182900700 | 0.35351747802400 | 0.54114043193900 | T | T | T |
| 0.17077693726300 | 0.35360048284100 | 0.87453541620100 | T | T | T |
| 0.50408075386000 | 0.35357250371300 | 0.20783035169200 | T | T | T |
| 0.50409592418400 | 0.35352891987500 | 0.54115752803000 | T | T | T |
| 0.50410516457000 | 0.35354097466500 | 0.87449789204800 | T | T | T |
| 0.83753393399300 | 0.35354341915500 | 0.20783989242400 | T | T | T |
| 0.83746796232300 | 0.35351666792000 | 0.54115480436900 | T | T | T |
| 0.83747259358200 | 0.35354766344400 | 0.87450880650400 | T | T | T |
| 0.17752328677400 | 0.33241788105000 | 0.27177042735200 | T | T | T |
| 0.17760259805600 | 0.32854482218700 | 0.60379435814800 | T | T | T |

|                  |                  |                  |   |   |   |
|------------------|------------------|------------------|---|---|---|
| 0.17754940537600 | 0.32862404685700 | 0.93721775037400 | T | T | T |
| 0.51087322167100 | 0.32862971899300 | 0.27052496258500 | T | T | T |
| 0.51092103196600 | 0.32857309626000 | 0.60381974411200 | T | T | T |
| 0.51090888687600 | 0.32857299730700 | 0.93715239926800 | T | T | T |
| 0.84427897058800 | 0.32850345796600 | 0.27047965491400 | T | T | T |
| 0.84427081272800 | 0.32853482331900 | 0.60380031849200 | T | T | T |
| 0.84426294956400 | 0.32854215267000 | 0.93715290111600 | T | T | T |
| 0.14473146419800 | 0.33174634371300 | 0.26896415850200 | T | T | T |
| 0.14473289889100 | 0.32779194751300 | 0.59896443310800 | T | T | T |
| 0.14468521003000 | 0.32778392126800 | 0.93226677770400 | T | T | T |
| 0.47802028272000 | 0.32776947230400 | 0.26558860815400 | T | T | T |
| 0.47805859629500 | 0.32774537573100 | 0.59893637913800 | T | T | T |
| 0.47804713718600 | 0.32774857789400 | 0.93225724239400 | T | T | T |
| 0.81140899501800 | 0.32784071952000 | 0.26564986649100 | T | T | T |
| 0.81140237027600 | 0.32778462884300 | 0.59895724903800 | T | T | T |
| 0.81139642699900 | 0.32777739607400 | 0.93228594000100 | T | T | T |
| 0.23882333953900 | 0.39066794027100 | 0.24588005494200 | T | T | T |
| 0.24157776808900 | 0.38619543597800 | 0.57433736420100 | T | T | T |
| 0.24144079012600 | 0.38611101625300 | 0.90789453340300 | T | T | T |
| 0.57482037095800 | 0.38619299849600 | 0.24113476290500 | T | T | T |
| 0.57487651352800 | 0.38612188965900 | 0.57442744433400 | T | T | T |
| 0.57486520344600 | 0.38612198895300 | 0.90779206695700 | T | T | T |
| 0.90846119551200 | 0.38619998190600 | 0.24079138997200 | T | T | T |
| 0.90826408184500 | 0.38614674706500 | 0.57437124171900 | T | T | T |
| 0.90822876616300 | 0.38614050925700 | 0.90777759229700 | T | T | T |
| 0.14872529183700 | 0.30380835061200 | 0.18443890914300 | T | T | T |
| 0.15019957221000 | 0.30228190143600 | 0.51181093991400 | T | T | T |
| 0.15021250296200 | 0.30230314258100 | 0.84517385607000 | T | T | T |
| 0.48354425421900 | 0.30227385283400 | 0.17846951777900 | T | T | T |
| 0.48353566580900 | 0.30228519659700 | 0.51179532629000 | T | T | T |

|                  |                  |                  |   |   |   |
|------------------|------------------|------------------|---|---|---|
| 0.48353905755700 | 0.30231731811200 | 0.84513433991000 | T | T | T |
| 0.81685896028800 | 0.30237091462500 | 0.17852795622000 | T | T | T |
| 0.81688480857700 | 0.30232770623900 | 0.51179887132200 | T | T | T |
| 0.81688625275700 | 0.30234110122500 | 0.84512050536800 | T | T | T |
| 0.21180890900200 | 0.36429256142300 | 0.16467123146300 | T | T | T |
| 0.18361293786900 | 0.30049128650400 | 0.51180623703800 | T | T | T |
| 0.18361826514500 | 0.30053000464400 | 0.84514762926800 | T | T | T |
| 0.51695330216800 | 0.30053415846200 | 0.17848020676000 | T | T | T |
| 0.51694417678600 | 0.30051206435900 | 0.51179924707300 | T | T | T |
| 0.51694790648800 | 0.30052345738200 | 0.84511840415500 | T | T | T |
| 0.85026287722400 | 0.30042628419400 | 0.17844135769500 | T | T | T |
| 0.85029185057800 | 0.30049345425600 | 0.51177812750700 | T | T | T |
| 0.85029211653800 | 0.30052298874200 | 0.84512209784600 | T | T | T |
| 0.19638783192100 | 0.88534131573000 | 0.22281068969200 | T | T | T |
| 0.19865184196100 | 0.88840654934000 | 0.55717037519700 | T | T | T |
| 0.19864240487200 | 0.88834715288500 | 0.89059280095500 | T | T | T |
| 0.53199034094800 | 0.88828591704900 | 0.22393684519100 | T | T | T |
| 0.53197212909800 | 0.88840581926300 | 0.55720209044900 | T | T | T |
| 0.53197398160200 | 0.88839426305400 | 0.89055253702200 | T | T | T |
| 0.86539170255600 | 0.88837557530800 | 0.22388431273800 | T | T | T |
| 0.86533316939200 | 0.88839479108400 | 0.55720297459100 | T | T | T |
| 0.86534219028900 | 0.88838790336400 | 0.89057090965300 | T | T | T |
| 0.22975486342900 | 0.92498803120600 | 0.24016582241700 | T | T | T |
| 0.22946154808400 | 0.92954119342700 | 0.57363026168500 | T | T | T |
| 0.22937867215900 | 0.92957507143500 | 0.90690291118500 | T | T | T |
| 0.56272126625300 | 0.92951832577600 | 0.24035881814900 | T | T | T |
| 0.56274901611000 | 0.92958684276900 | 0.57361924524800 | T | T | T |
| 0.56275866243900 | 0.92960358801200 | 0.90691791780100 | T | T | T |
| 0.89618050826500 | 0.92943923503000 | 0.24043235742400 | T | T | T |
| 0.89613498727500 | 0.92957383647500 | 0.57359481441500 | T | T | T |

|                  |                  |                  |   |   |   |
|------------------|------------------|------------------|---|---|---|
| 0.89612390955200 | 0.92959229348900 | 0.90690622771300 | T | T | T |
| 0.16822828841800 | 0.89242865516900 | 0.23923084149700 | T | T | T |
| 0.16933607770400 | 0.89971010209900 | 0.57548923898200 | T | T | T |
| 0.16930494199700 | 0.89972974921000 | 0.90895391438000 | T | T | T |
| 0.50264683228800 | 0.89962539387900 | 0.24224534554900 | T | T | T |
| 0.50265429108200 | 0.89973663770300 | 0.57554062880500 | T | T | T |
| 0.50265060004100 | 0.89974020014800 | 0.90889531084100 | T | T | T |
| 0.83605081888100 | 0.89968449208000 | 0.24217474901800 | T | T | T |
| 0.83601143118700 | 0.89972378186800 | 0.57552313205300 | T | T | T |
| 0.83600780553600 | 0.89972870906400 | 0.90889405714500 | T | T | T |
| 0.16833883083600 | 0.92542688689700 | 0.20622568770400 | T | T | T |
| 0.17148399697100 | 0.91089041000500 | 0.54160697613600 | T | T | T |
| 0.17147565954900 | 0.91076493573500 | 0.87502779815600 | T | T | T |
| 0.50488060757000 | 0.91077538766500 | 0.20836057799600 | T | T | T |
| 0.50480493963100 | 0.91086024552200 | 0.54163891076200 | T | T | T |
| 0.50481055039600 | 0.91084322638600 | 0.87498487409600 | T | T | T |
| 0.83822941150100 | 0.91084095310400 | 0.20830502915100 | T | T | T |
| 0.83817488256600 | 0.91087223634700 | 0.54163356696000 | T | T | T |
| 0.83817310791200 | 0.91082734609600 | 0.87499341532200 | T | T | T |
| 0.17943808206900 | 0.93459817141400 | 0.27139877296200 | T | T | T |
| 0.17979880546900 | 0.93830714359400 | 0.60330486332300 | T | T | T |
| 0.17975715074000 | 0.93827429005700 | 0.93669952242900 | T | T | T |
| 0.51308211549700 | 0.93819273240000 | 0.27006044766200 | T | T | T |
| 0.51312330300800 | 0.93830104933200 | 0.60332919362500 | T | T | T |
| 0.51311474529100 | 0.93831035621900 | 0.93666161787400 | T | T | T |
| 0.84647208085300 | 0.93835041799900 | 0.26998052990000 | T | T | T |
| 0.84647014540600 | 0.93832874372000 | 0.60330852917600 | T | T | T |
| 0.84646359849100 | 0.93833974496400 | 0.93665245541700 | T | T | T |
| 0.14649602453500 | 0.93353514715000 | 0.26922232001700 | T | T | T |
| 0.14670936690100 | 0.93679418319300 | 0.59945998913300 | T | T | T |

|                  |                  |                  |   |   |   |
|------------------|------------------|------------------|---|---|---|
| 0.14666439098200 | 0.93682612604200 | 0.93277170058700 | T | T | T |
| 0.48000638281200 | 0.93679270103000 | 0.26610447567900 | T | T | T |
| 0.48003553281500 | 0.93685099659500 | 0.59943948419300 | T | T | T |
| 0.48002665892900 | 0.93684929771300 | 0.93276817025400 | T | T | T |
| 0.81338341131900 | 0.93674739037500 | 0.26614001880400 | T | T | T |
| 0.81338012541600 | 0.93680758760900 | 0.59945714827100 | T | T | T |
| 0.81337255036700 | 0.93682601547700 | 0.93278460208900 | T | T | T |
| 0.24206490806300 | 0.87801571434900 | 0.24534257696600 | T | T | T |
| 0.24477811683300 | 0.88318060557200 | 0.57148169230600 | T | T | T |
| 0.24466930196100 | 0.88317260151000 | 0.90502031060500 | T | T | T |
| 0.57806970335900 | 0.88318269419300 | 0.23829264428100 | T | T | T |
| 0.57808043678900 | 0.88323317823400 | 0.57157003647300 | T | T | T |
| 0.57807070976100 | 0.88323116705400 | 0.90493047938600 | T | T | T |
| 0.91160700221100 | 0.88319844135600 | 0.23796515438300 | T | T | T |
| 0.91145924170000 | 0.88321410481400 | 0.57151051323500 | T | T | T |
| 0.91142193505600 | 0.88320760052900 | 0.90492016490800 | T | T | T |
| 0.14877527180100 | 0.95782074189800 | 0.18443634040700 | T | T | T |
| 0.14930273722800 | 0.96094938634500 | 0.51232796200900 | T | T | T |
| 0.14929397551600 | 0.96088315820400 | 0.84568883933700 | T | T | T |
| 0.48293662248100 | 0.96088569109800 | 0.17902568951900 | T | T | T |
| 0.48263158994700 | 0.96092392673400 | 0.51232966001800 | T | T | T |
| 0.48263588339700 | 0.96089559518500 | 0.84567152103200 | T | T | T |
| 0.81598290882200 | 0.96085707942300 | 0.17904166921100 | T | T | T |
| 0.81597896619500 | 0.96088016350800 | 0.51234486392600 | T | T | T |
| 0.81597245756900 | 0.96086763247400 | 0.84567443904800 | T | T | T |
| 0.21147199404600 | 0.89883413865000 | 0.16473940702700 | T | T | T |
| 0.18270566511500 | 0.96339565655700 | 0.51168674481000 | T | T | T |
| 0.18269359833900 | 0.96331979862700 | 0.84504787485300 | T | T | T |
| 0.51632835216500 | 0.96330315757000 | 0.17850156358700 | T | T | T |
| 0.51603356494800 | 0.96335135620400 | 0.51169759673900 | T | T | T |



|                  |                  |                  |   |   |   |
|------------------|------------------|------------------|---|---|---|
| 0.51603737946200 | 0.96333674622300 | 0.84502117283700 | T | T | T |
| 0.84937999740600 | 0.96342306803100 | 0.17834191717800 | T | T | T |
| 0.84937954556900 | 0.96337523648100 | 0.51167796908700 | T | T | T |
| 0.84937270611100 | 0.96334414928900 | 0.84502398282100 | T | T | T |
| 0.22976330615500 | 0.37256400970300 | 0.23202310359500 | T | T | T |
| 0.22821464093800 | 0.36651852316000 | 0.56518427126000 | T | T | T |
| 0.22822705327600 | 0.36644871984300 | 0.89853341110600 | T | T | T |
| 0.56155054317200 | 0.36649767858100 | 0.23187333727400 | T | T | T |
| 0.56155223203800 | 0.36647835419900 | 0.56519597670200 | T | T | T |
| 0.56155834964100 | 0.36649247047200 | 0.89852681854100 | T | T | T |
| 0.89491800800500 | 0.36651874896300 | 0.23187921520500 | T | T | T |
| 0.89490038643100 | 0.36650589498500 | 0.56518878358800 | T | T | T |
| 0.89490779765600 | 0.36650950471100 | 0.89852957073400 | T | T | T |
| 0.17312609660300 | 0.37759640711900 | 0.21963485053400 | T | T | T |
| 0.17487022103600 | 0.37729154669500 | 0.55510062991900 | T | T | T |
| 0.17487125354100 | 0.37733595125800 | 0.88849812903100 | T | T | T |
| 0.50818530004700 | 0.37732380419300 | 0.22179292688600 | T | T | T |
| 0.50819588993200 | 0.37728866525000 | 0.55512140067700 | T | T | T |
| 0.50819918743200 | 0.37730048445000 | 0.88846159837000 | T | T | T |
| 0.84162086953000 | 0.37730963485600 | 0.22179942790400 | T | T | T |
| 0.84155712185900 | 0.37728391583900 | 0.55511888174600 | T | T | T |
| 0.84156887829900 | 0.37729973216100 | 0.88847481148300 | T | T | T |
| 0.16105231758800 | 0.35249005158000 | 0.27025209105600 | T | T | T |
| 0.16134918555800 | 0.34883491423700 | 0.60039887112800 | T | T | T |
| 0.16129500834400 | 0.34885033517100 | 0.93370445252600 | T | T | T |
| 0.49461709403400 | 0.34885404745100 | 0.26704393391800 | T | T | T |
| 0.49465972801600 | 0.34882773780400 | 0.60038954313900 | T | T | T |
| 0.49465043374100 | 0.34883057413700 | 0.93371593173900 | T | T | T |
| 0.82804287925900 | 0.34882431319200 | 0.26708063301900 | T | T | T |
| 0.82801933448200 | 0.34882731965000 | 0.60039836324500 | T | T | T |

|                  |                  |                  |   |   |   |
|------------------|------------------|------------------|---|---|---|
| 0.82800999472500 | 0.34882549835100 | 0.93373609721700 | T | T | T |
| 0.16411748745500 | 0.30460634823000 | 0.19808337110800 | T | T | T |
| 0.16704088819900 | 0.30742345534700 | 0.52395361159200 | T | T | T |
| 0.16705755194500 | 0.30745490067000 | 0.85729031270600 | T | T | T |
| 0.50037856758200 | 0.30744663953900 | 0.19061042479900 | T | T | T |
| 0.50037325996000 | 0.30745404343100 | 0.52393308000100 | T | T | T |
| 0.50038415452000 | 0.30747436293400 | 0.85725734109900 | T | T | T |
| 0.83372979542900 | 0.30743601332800 | 0.19062579540400 | T | T | T |
| 0.83372950710000 | 0.30745992053300 | 0.52392567838100 | T | T | T |
| 0.83372224947900 | 0.30748257756500 | 0.85725302695500 | T | T | T |
| 0.23175751668600 | 0.89547842728900 | 0.23198781299100 | T | T | T |
| 0.23019445590100 | 0.90169844147100 | 0.56311437905000 | T | T | T |
| 0.23020093794300 | 0.90166181372200 | 0.89644894688300 | T | T | T |
| 0.56354833024200 | 0.90169595399900 | 0.22982237365200 | T | T | T |
| 0.56353008506400 | 0.90172068357200 | 0.56312474876200 | T | T | T |
| 0.56353375851400 | 0.90170547418300 | 0.89645351292600 | T | T | T |
| 0.89688678456200 | 0.90171645334500 | 0.22980791726800 | T | T | T |
| 0.89687222625900 | 0.90169409105100 | 0.56311502031000 | T | T | T |
| 0.89687405774900 | 0.90167931307200 | 0.89645546431800 | T | T | T |
| 0.17520351880100 | 0.88676411686100 | 0.22028126183400 | T | T | T |
| 0.17665482883300 | 0.88772662494600 | 0.55560835254100 | T | T | T |
| 0.17664301629300 | 0.88764900094000 | 0.88903510522900 | T | T | T |
| 0.50999943355800 | 0.88759092432700 | 0.22235729282000 | T | T | T |
| 0.50997896208900 | 0.88771614296000 | 0.55564373096900 | T | T | T |
| 0.50997999765700 | 0.88770159412700 | 0.88899025601600 | T | T | T |
| 0.84338391182800 | 0.88768339259200 | 0.22230577455100 | T | T | T |
| 0.84333465151600 | 0.88771457737100 | 0.55563687609100 | T | T | T |
| 0.84333791985500 | 0.88768843400800 | 0.88899984596700 | T | T | T |
| 0.16330063630700 | 0.91366217248400 | 0.27055282895000 | T | T | T |
| 0.16388289325800 | 0.91681694524000 | 0.60087381091800 | T | T | T |

|                  |                  |                  |   |   |   |
|------------------|------------------|------------------|---|---|---|
| 0.16383236445700 | 0.91682227163900 | 0.93420941157100 | T | T | T |
| 0.49715929926300 | 0.91676359430100 | 0.26755274843400 | T | T | T |
| 0.49719878987800 | 0.91683912306600 | 0.60087349241200 | T | T | T |
| 0.49719352085200 | 0.91683996687200 | 0.93420669012900 | T | T | T |
| 0.83057411722700 | 0.91682838605200 | 0.26754580509100 | T | T | T |
| 0.83055589242900 | 0.91683332918900 | 0.60087720954400 | T | T | T |
| 0.83054714425100 | 0.91684820493600 | 0.93421389686200 | T | T | T |
| 0.16490663422400 | 0.95761729954400 | 0.19727768429100 | T | T | T |
| 0.16639745164200 | 0.95654152901500 | 0.52421095882200 | T | T | T |
| 0.16638605848800 | 0.95648254494600 | 0.85755616847400 | T | T | T |
| 0.49998415415100 | 0.95649474583700 | 0.19097136977700 | T | T | T |
| 0.49972350652300 | 0.95650169814900 | 0.52420806747200 | T | T | T |
| 0.49973380903400 | 0.95648265396200 | 0.85753590860900 | T | T | T |
| 0.83309688792100 | 0.95651843467300 | 0.19089055382000 | T | T | T |
| 0.83308187794400 | 0.95649837097400 | 0.52420689903000 | T | T | T |
| 0.83306989947200 | 0.95647671937000 | 0.85753894552600 | T | T | T |
| 0.23179597790800 | 0.30072362910300 | 0.18096279378700 | T | T | T |
| 0.21933696856900 | 0.39091681043500 | 0.45068435017000 | T | T | T |
| 0.21932021356600 | 0.39093745946700 | 0.78397938903000 | T | T | T |
| 0.55264874067400 | 0.39093721390000 | 0.11731345243100 | T | T | T |
| 0.55265437144100 | 0.39093055363700 | 0.45064756284700 | T | T | T |
| 0.55265540208800 | 0.39093179749600 | 0.78397494290300 | T | T | T |
| 0.88599237238600 | 0.39092733394200 | 0.11732263353800 | T | T | T |
| 0.88598152383500 | 0.39092825606500 | 0.45065316107400 | T | T | T |
| 0.88599353632900 | 0.39093242788600 | 0.78397941866400 | T | T | T |
| 0.23128898029300 | 0.96294420934300 | 0.18042275365600 | T | T | T |
| 0.22402415290400 | 0.88381494564700 | 0.45093215364600 | T | T | T |
| 0.22398477629900 | 0.88379011357800 | 0.78423593413800 | T | T | T |
| 0.55732268308800 | 0.88378373550800 | 0.11756434346200 | T | T | T |
| 0.55730866039700 | 0.88379622687300 | 0.45090629881300 | T | T | T |

|                  |                  |                  |   |   |   |
|------------------|------------------|------------------|---|---|---|
| 0.55732002701700 | 0.88379586838600 | 0.78423661118400 | T | T | T |
| 0.89066402205000 | 0.88380474183600 | 0.11757730791300 | T | T | T |
| 0.89063175808800 | 0.88379936927100 | 0.45090912492700 | T | T | T |
| 0.89066712834700 | 0.88379276247500 | 0.78423996055500 | T | T | T |
| 0.20659382211500 | 0.34173776280500 | 0.15121397619400 | T | T | T |
| 0.20545737702200 | 0.39416980847800 | 0.49622011402800 | T | T | T |
| 0.20546471065700 | 0.39415712649300 | 0.82953236867600 | T | T | T |
| 0.53880650614000 | 0.39415632304600 | 0.16286714735600 | T | T | T |
| 0.53880446662000 | 0.39416004632100 | 0.49620097015300 | T | T | T |
| 0.53880591551300 | 0.39416001004900 | 0.82952965581400 | T | T | T |
| 0.87215039799100 | 0.39416151573800 | 0.16287532976400 | T | T | T |
| 0.87214352037200 | 0.39416375229100 | 0.49620900341000 | T | T | T |
| 0.87213633401200 | 0.39416058914800 | 0.82953084314700 | T | T | T |
| 0.20598951090300 | 0.92106466943200 | 0.15117223573900 | T | T | T |
| 0.20561225140100 | 0.87646614700300 | 0.49483693303000 | T | T | T |
| 0.20561557459000 | 0.87647735092000 | 0.82816517893800 | T | T | T |
| 0.53896475064500 | 0.87648004686100 | 0.16149552127900 | T | T | T |
| 0.53896315546900 | 0.87647245783000 | 0.49484281231800 | T | T | T |
| 0.53896097084200 | 0.87647191556500 | 0.82816938767500 | T | T | T |
| 0.87231360853500 | 0.87647442382100 | 0.16150829263800 | T | T | T |
| 0.87230122322900 | 0.87646370770700 | 0.49484951021800 | T | T | T |
| 0.87229315296700 | 0.87647313303500 | 0.82816631455600 | T | T | T |
| 0.21761351998200 | 0.30318048727300 | 0.16029674584900 | T | T | T |
| 0.21244505182000 | 0.39237929660000 | 0.47343219995300 | T | T | T |
| 0.21244355474700 | 0.39237431449200 | 0.80674110233000 | T | T | T |
| 0.54577561594900 | 0.39237848879200 | 0.14007351882000 | T | T | T |
| 0.54577869101600 | 0.39237101418600 | 0.47340709756100 | T | T | T |
| 0.54578147629700 | 0.39237039018900 | 0.80673626991000 | T | T | T |
| 0.87913319429300 | 0.39237724178200 | 0.14008453203700 | T | T | T |
| 0.87911629515600 | 0.39237257042300 | 0.47341422409300 | T | T | T |

|                  |                  |                  |   |   |   |
|------------------|------------------|------------------|---|---|---|
| 0.87911805050500 | 0.39237182313300 | 0.80673986766100 | T | T | T |
| 0.21694095832600 | 0.95979969260100 | 0.15993674504500 | T | T | T |
| 0.21485585828000 | 0.88044614369400 | 0.47288062022400 | T | T | T |
| 0.21484074494900 | 0.88045034020200 | 0.80620459780800 | T | T | T |
| 0.54818312980300 | 0.88044236454800 | 0.13953103328800 | T | T | T |
| 0.54817477252500 | 0.88045213587800 | 0.47287612799600 | T | T | T |
| 0.54818073504600 | 0.88045283368600 | 0.80620602206300 | T | T | T |
| 0.88153863444500 | 0.88044902703300 | 0.13954724888100 | T | T | T |
| 0.88150896228000 | 0.88044756511500 | 0.47288260358400 | T | T | T |
| 0.88152275594500 | 0.88045090887300 | 0.80620703944800 | T | T | T |

**E. Hydrogen evolution reaction step  $H^+_{sol} + H^* + e^- \rightarrow H_2$  on the semiconductor**

**AlAs surface**

**1) Small supercell 1- $H^+_{sol}$  IS**

POSCAR

1

|                   |                   |                   |
|-------------------|-------------------|-------------------|
| 16.22839453087127 | 0.00000000000000  | 0.00000000000000  |
| 0.00000000000000  | 17.21281173080250 | 0.00000000000000  |
| 0.00000000000000  | 0.00000000000000  | 30.38812200000589 |

Al As H O

60 60 20 8

Direct

|                  |                  |                  |
|------------------|------------------|------------------|
| 0.00035290822226 | 0.02637460550080 | 0.01395651091870 |
| 0.99854089230800 | 0.69187553032700 | 0.01406009100750 |
| 0.00140364565448 | 0.35796817026000 | 0.01350427771170 |
| 0.49972631590500 | 0.02869945406010 | 0.01348160158400 |
| 0.49427687044600 | 0.67061087459800 | 0.00789799792475 |
| 0.48661170082100 | 0.31265706139500 | 0.97887885504100 |
| 0.25029877639400 | 0.02723521169530 | 0.01392146889070 |

|                  |                  |                  |
|------------------|------------------|------------------|
| 0.24321300720500 | 0.68834518125100 | 0.01411932152480 |
| 0.24818398592700 | 0.36352543360800 | 0.01197481669060 |
| 0.74957862373500 | 0.02717143535480 | 0.01391772796640 |
| 0.75204593649900 | 0.69158955599000 | 0.01472111322960 |
| 0.75970503308400 | 0.35655410788400 | 0.01481018721460 |
| 0.37881665558600 | 0.16706107045300 | 0.06185710396770 |
| 0.37503780140200 | 0.83049743430200 | 0.06163671318420 |
| 0.37527273388900 | 0.48953533551700 | 0.06014537834630 |
| 0.87512256146900 | 0.16361627938000 | 0.06130262185130 |
| 0.87463155086900 | 0.83065827240800 | 0.06133424555800 |
| 0.87566541671300 | 0.49630069536300 | 0.06122333227790 |
| 0.12709950838700 | 0.16498681869700 | 0.06119268383570 |
| 0.12471751695000 | 0.83012089298000 | 0.06117022013180 |
| 0.12500513778900 | 0.49643600039100 | 0.06120009615230 |
| 0.61967765257400 | 0.16538146713600 | 0.06125657570870 |
| 0.62346351649500 | 0.83130696049100 | 0.06145490528820 |
| 0.62440120093700 | 0.49753164118000 | 0.06345380739160 |
| 0.00000000000000 | 0.00000000000000 | 0.13043999660500 |
| 0.00000000000000 | 0.66667002414000 | 0.13043999660500 |
| 0.00000000000000 | 0.33333000540000 | 0.13043999660500 |
| 0.50000000002500 | 0.00000000000000 | 0.13043999660500 |
| 0.50000000002500 | 0.66667002414000 | 0.13043999660500 |
| 0.50000000002500 | 0.33333000540000 | 0.13043999660500 |
| 0.24999999998000 | 0.00000000000000 | 0.13043999660500 |
| 0.24999999998000 | 0.66667002414000 | 0.13043999660500 |
| 0.24999999998000 | 0.33333000540000 | 0.13043999660500 |
| 0.75000000026600 | 0.00000000000000 | 0.13043999660500 |
| 0.75000000026600 | 0.66667002414000 | 0.13043999660500 |
| 0.75000000026600 | 0.33333000540000 | 0.13043999660500 |
| 0.37878241354700 | 0.16700648498500 | 0.19905279836800 |

|                  |                  |                  |
|------------------|------------------|------------------|
| 0.37500831584000 | 0.83060876707500 | 0.19918685531200 |
| 0.37526565607600 | 0.48955619828600 | 0.20073233020400 |
| 0.87514442694000 | 0.16358310380200 | 0.19959955425800 |
| 0.87465920938000 | 0.83066509099800 | 0.19955784783300 |
| 0.87570645387200 | 0.49630177732000 | 0.19965742640100 |
| 0.12710507725700 | 0.16496747376200 | 0.19970692015200 |
| 0.12471067296000 | 0.83014891355800 | 0.19971298673000 |
| 0.12502667212700 | 0.49646585159400 | 0.19968050046100 |
| 0.61972115910200 | 0.16535980203500 | 0.19963266676900 |
| 0.62351377069800 | 0.83141221240200 | 0.19936882071200 |
| 0.62442703507900 | 0.49758317325400 | 0.19741090005000 |
| 0.00036027907234 | 0.02639102379060 | 0.24699390605100 |
| 0.99859017510500 | 0.69189745912100 | 0.24686352984400 |
| 0.00144644682462 | 0.35795719345800 | 0.24739613946300 |
| 0.49972682928500 | 0.02878114361820 | 0.24741920032900 |
| 0.49424657198400 | 0.67082356149000 | 0.25285448099900 |
| 0.48664924307700 | 0.31273786473500 | 0.28186551001800 |
| 0.25029175992600 | 0.02727708890600 | 0.24701959017200 |
| 0.24325002484800 | 0.68849623334100 | 0.24675853781000 |
| 0.24821937704400 | 0.36353955256200 | 0.24890352069200 |
| 0.74959970591000 | 0.02721146379290 | 0.24701786732300 |
| 0.75216230148500 | 0.69164536597900 | 0.24613367762500 |
| 0.75976821976400 | 0.35652679033900 | 0.24607624237000 |
| 0.37468355133700 | 0.09577763246360 | 0.98989591705100 |
| 0.37236699254200 | 0.75174835294200 | 0.99261995321300 |
| 0.37581925947800 | 0.42295300073500 | 0.98746949076300 |
| 0.87515616804700 | 0.09344613613870 | 0.98976799297600 |
| 0.87412333358800 | 0.76023427159600 | 0.98934541273000 |
| 0.87820376576800 | 0.42765552656500 | 0.98873456494700 |
| 0.12498039156400 | 0.09385164519950 | 0.98975436235600 |

|                  |                  |                  |
|------------------|------------------|------------------|
| 0.12243899113100 | 0.75971115944300 | 0.98926104948700 |
| 0.12225114732200 | 0.42875505499400 | 0.98876371049900 |
| 0.62527281893800 | 0.09466557291190 | 0.98934175397900 |
| 0.62007318537400 | 0.75041149604300 | 0.99202841190800 |
| 0.62007323794600 | 0.40632422501800 | 0.99821666710900 |
| 0.00033607322470 | 0.24768698696700 | 0.06426168763510 |
| 0.99983638434000 | 0.91468517869300 | 0.06399945600260 |
| 0.99982821867700 | 0.58113574412400 | 0.06435018983610 |
| 0.50028060696700 | 0.25504970128100 | 0.06006701103030 |
| 0.49926610197100 | 0.91540190657900 | 0.06318035645470 |
| 0.49793550553900 | 0.57675506746900 | 0.06697426106210 |
| 0.25140831741200 | 0.25083789356200 | 0.06295256974000 |
| 0.25001018495100 | 0.91438268651200 | 0.06355183048070 |
| 0.25160294123200 | 0.57865032822200 | 0.06438859743950 |
| 0.74927217898300 | 0.24655253186100 | 0.06482616079300 |
| 0.74927253952500 | 0.91421219369200 | 0.06344531102110 |
| 0.74986228184000 | 0.58019754448000 | 0.06403927399310 |
| 0.3750000000400  | 0.08332999798400 | 0.13043999660500 |
| 0.3750000000400  | 0.7499999984900  | 0.13043999660500 |
| 0.3750000000400  | 0.41666999457100 | 0.13043999660500 |
| 0.87500000009500 | 0.08332999798400 | 0.13043999660500 |
| 0.87500000009500 | 0.7499999984900  | 0.13043999660500 |
| 0.87500000009500 | 0.41666999457100 | 0.13043999660500 |
| 0.12500000002200 | 0.08332999798400 | 0.13043999660500 |
| 0.12500000002200 | 0.7499999984900  | 0.13043999660500 |
| 0.12500000002200 | 0.41666999457100 | 0.13043999660500 |
| 0.6249999998400  | 0.08332999798400 | 0.13043999660500 |
| 0.6249999998400  | 0.7499999984900  | 0.13043999660500 |
| 0.6249999998400  | 0.41666999457100 | 0.13043999660500 |
| 0.00034707743004 | 0.24768081631900 | 0.19663518659900 |



|                  |                  |                  |
|------------------|------------------|------------------|
| 0.99983940334300 | 0.91473426247700 | 0.19691671130300 |
| 0.99985001364300 | 0.58117244494400 | 0.19655870356100 |
| 0.50027040053100 | 0.25498112706200 | 0.20079393246900 |
| 0.49927750309600 | 0.91547490367300 | 0.19771507269600 |
| 0.49793777712400 | 0.57676893084100 | 0.19388136864700 |
| 0.25141379701500 | 0.25083357902100 | 0.19794081196000 |
| 0.24997827363200 | 0.91446534589300 | 0.19735054272000 |
| 0.25161901710700 | 0.57871489227500 | 0.19653678450000 |
| 0.74930797744200 | 0.24653706453600 | 0.19605881381600 |
| 0.74932778715800 | 0.91427792592900 | 0.19746219869200 |
| 0.74990928099400 | 0.58021290630700 | 0.19685917813000 |
| 0.37468443157200 | 0.09580881988460 | 0.27105361721100 |
| 0.37239073189100 | 0.75197310777200 | 0.26819769964800 |
| 0.37584418882200 | 0.42299786797200 | 0.27342419250100 |
| 0.87517007317500 | 0.09348742211210 | 0.27117775326500 |
| 0.87418041613300 | 0.76027606563600 | 0.27157222083200 |
| 0.87824554636200 | 0.42765799448300 | 0.27214650613000 |
| 0.12497988886500 | 0.09390003664360 | 0.27118710112500 |
| 0.12245982029500 | 0.75978821672400 | 0.27164717927900 |
| 0.12228850082700 | 0.42876635030300 | 0.27211287032300 |
| 0.62528211815700 | 0.09471005818660 | 0.27157641912200 |
| 0.62015745359300 | 0.75045013843400 | 0.26874014591500 |
| 0.62012979098700 | 0.40630962501900 | 0.26259430208100 |
| 0.57261051702500 | 0.68176838914800 | 0.38018768325100 |
| 0.64449239400500 | 0.46527773084900 | 0.29897211375500 |
| 0.67121330551300 | 0.71395086871200 | 0.34137183191900 |
| 0.49391568019200 | 0.74604537619600 | 0.36495582081400 |
| 0.49153652883600 | 0.64354056654200 | 0.35793150317700 |
| 0.53340771375400 | 0.81556386307000 | 0.32688559656500 |
| 0.43673880359000 | 0.80583996876000 | 0.32636307330100 |

|                  |                  |                  |
|------------------|------------------|------------------|
| 0.70473362582400 | 0.71312511121500 | 0.39036649642000 |
| 0.43917652826000 | 0.54645505943300 | 0.29855179509900 |
| 0.53544598900700 | 0.55132315589900 | 0.30197807221400 |
| 0.57351331115600 | 0.67976287277300 | 0.88035195697000 |
| 0.64460191480800 | 0.46533672707100 | 0.96188727496400 |
| 0.67141601413200 | 0.71397737054700 | 0.91949512057400 |
| 0.49395048808600 | 0.74308419786200 | 0.89541870945100 |
| 0.49285323107900 | 0.64062551749900 | 0.90249161381900 |
| 0.53265725730700 | 0.81368569445600 | 0.93301188167100 |
| 0.43610944922900 | 0.80321191791600 | 0.93372812496000 |
| 0.70548809321500 | 0.71331877074700 | 0.87061350883200 |
| 0.43938954780100 | 0.54603289855500 | 0.96217008188900 |
| 0.53568629111400 | 0.55065166995700 | 0.95915297905000 |
| 0.66615085833500 | 0.68730887638600 | 0.37041823352900 |
| 0.50878275565400 | 0.68334902127800 | 0.37982610799400 |
| 0.48536254393900 | 0.81160212305500 | 0.34746920044800 |
| 0.48612224246800 | 0.58492309221600 | 0.30428404140200 |
| 0.66695577399000 | 0.68720209343900 | 0.89046078938200 |
| 0.50972246575300 | 0.68045120908200 | 0.88049640230400 |
| 0.48465140628600 | 0.80866948691500 | 0.91250348123000 |
| 0.48651575147900 | 0.58434414745100 | 0.95644262299800 |

## 2) Small supercell 1-H<sup>+</sup><sub>sol</sub> FS

POSCAR

1

|                   |                   |                   |
|-------------------|-------------------|-------------------|
| 16.22839453087127 | 0.00000000000000  | 0.00000000000000  |
| 0.00000000000000  | 17.21281173080250 | 0.00000000000000  |
| 0.00000000000000  | 0.00000000000000  | 30.38812200000589 |

Al As H O

60 60 20 8

Direct

|                  |                  |                  |
|------------------|------------------|------------------|
| 0.00012293751599 | 0.02469040317220 | 0.01311285020380 |
| 0.99919826901000 | 0.69135827882800 | 0.01321084082930 |
| 0.00045890953037 | 0.35787386296900 | 0.01315552905020 |
| 0.49983476263900 | 0.02478326999570 | 0.01329219212490 |
| 0.49760889170100 | 0.67089034302800 | 0.00123384331080 |
| 0.50156296631100 | 0.35745821042800 | 0.01321479051160 |
| 0.24992661309600 | 0.02424240558430 | 0.01321251397390 |
| 0.24759978701300 | 0.69121744358400 | 0.01262273964040 |
| 0.25029021862500 | 0.35872123155200 | 0.01272803213400 |
| 0.75007911645600 | 0.02476064848460 | 0.01328397000170 |
| 0.75009368366700 | 0.68994739348900 | 0.01281296503270 |
| 0.75079311628900 | 0.35750084996700 | 0.01315181006720 |
| 0.37497973344100 | 0.16364616928900 | 0.06121837428640 |
| 0.37472442841700 | 0.82973623085900 | 0.06165701814370 |
| 0.37663968993700 | 0.49796476390000 | 0.06193619237700 |
| 0.87524003554200 | 0.16367896050400 | 0.06128008678430 |
| 0.87465442116900 | 0.83059599490100 | 0.06136913652280 |
| 0.87482675516400 | 0.49708848023800 | 0.06132037928910 |
| 0.12537418779100 | 0.16381676162700 | 0.06122546489590 |
| 0.12477851050400 | 0.83062333716800 | 0.06136342251570 |
| 0.12527989194700 | 0.49740658115300 | 0.06141619103760 |
| 0.62520566793800 | 0.16367910007300 | 0.06129548682550 |
| 0.62441518259300 | 0.83041795323900 | 0.06141722329110 |
| 0.62341413890000 | 0.49704088540400 | 0.06141209644640 |
| 0.00000000000000 | 0.00000000000000 | 0.13043999660500 |
| 0.00000000000000 | 0.66667002414000 | 0.13043999660500 |
| 0.00000000000000 | 0.33333000540000 | 0.13043999660500 |
| 0.50000000002500 | 0.00000000000000 | 0.13043999660500 |
| 0.50000000002500 | 0.66667002414000 | 0.13043999660500 |

|                  |                  |                  |
|------------------|------------------|------------------|
| 0.5000000002500  | 0.33333000540000 | 0.13043999660500 |
| 0.2499999998000  | 0.00000000000000 | 0.13043999660500 |
| 0.2499999998000  | 0.66667002414000 | 0.13043999660500 |
| 0.2499999998000  | 0.33333000540000 | 0.13043999660500 |
| 0.75000000026600 | 0.00000000000000 | 0.13043999660500 |
| 0.75000000026600 | 0.66667002414000 | 0.13043999660500 |
| 0.75000000026600 | 0.33333000540000 | 0.13043999660500 |
| 0.37497659198200 | 0.16365987132100 | 0.19964843002900 |
| 0.37478468605700 | 0.82970409193400 | 0.19927083815500 |
| 0.37669242950200 | 0.49803244139500 | 0.19895298877500 |
| 0.87523659262800 | 0.16369481498700 | 0.19959121271400 |
| 0.87466391064300 | 0.83059929641300 | 0.19951048972700 |
| 0.87480729645800 | 0.49715255077100 | 0.19954633425800 |
| 0.12536664681600 | 0.16383352859200 | 0.19964225739700 |
| 0.12480749323800 | 0.83063140845300 | 0.19951228837100 |
| 0.12531872145100 | 0.49747538627000 | 0.19945214797200 |
| 0.62519991963000 | 0.16369524249600 | 0.19957393385900 |
| 0.62443384279000 | 0.83036895558300 | 0.19950669047600 |
| 0.62337815614000 | 0.49713334395200 | 0.19945614529700 |
| 0.00012598614697 | 0.02470632119790 | 0.24775990532100 |
| 0.99923993198200 | 0.69140870295400 | 0.24768004355300 |
| 0.00045319713757 | 0.35792399384100 | 0.24770019820100 |
| 0.49983308548000 | 0.02479924818370 | 0.24755922146800 |
| 0.49772634675400 | 0.67106571936300 | 0.25984421747900 |
| 0.50154494878400 | 0.35749142174600 | 0.24765944384200 |
| 0.24993049722300 | 0.02424718342250 | 0.24765368241300 |
| 0.24777137232800 | 0.69130970735100 | 0.24833029461200 |
| 0.25029154916000 | 0.35875213446600 | 0.24813619195300 |
| 0.75008177488900 | 0.02475908791840 | 0.24758567034400 |
| 0.75000551503400 | 0.69005975254800 | 0.24811231334700 |

|                  |                  |                  |
|------------------|------------------|------------------|
| 0.75078069200300 | 0.35754516087600 | 0.24771217912800 |
| 0.37483015401200 | 0.09294439335580 | 0.98980503956500 |
| 0.37411617964400 | 0.75660078293100 | 0.99233129799500 |
| 0.37661791981300 | 0.42655032788100 | 0.99026024164200 |
| 0.87505537616700 | 0.09309930643850 | 0.98978605450700 |
| 0.87426398637600 | 0.75969206312400 | 0.98989655878500 |
| 0.87553859993900 | 0.42631256084800 | 0.98987228611400 |
| 0.12515358188700 | 0.09307543361720 | 0.98979211673600 |
| 0.12326138813200 | 0.76035858805500 | 0.98971399078400 |
| 0.12515349643700 | 0.42694950143300 | 0.98976650100900 |
| 0.62499750215600 | 0.09295126311820 | 0.98981133938500 |
| 0.62273815001700 | 0.75558085046200 | 0.99181095587600 |
| 0.62604052677900 | 0.42583944082900 | 0.98986602727300 |
| 0.00029709803182 | 0.24770285663800 | 0.06402267662650 |
| 0.99976408508200 | 0.91456202310700 | 0.06401217404610 |
| 0.99984167226600 | 0.58111701258500 | 0.06397812504890 |
| 0.50008234116100 | 0.24744408128300 | 0.06409660508040 |
| 0.49954081422700 | 0.91430031208200 | 0.06390404461110 |
| 0.50015386004000 | 0.58192277055100 | 0.06465276141130 |
| 0.25037321154700 | 0.24833501315400 | 0.06374033098300 |
| 0.25003196511900 | 0.91440155821200 | 0.06415218425600 |
| 0.25014043983000 | 0.58115141274900 | 0.06385303569030 |
| 0.75032089577500 | 0.24751350525600 | 0.06409206889710 |
| 0.74958771385200 | 0.91438899152700 | 0.06395478791430 |
| 0.74947933947300 | 0.58052293681800 | 0.06412255960590 |
| 0.37500000000400 | 0.08332999798400 | 0.13043999660500 |
| 0.37500000000400 | 0.74999999984900 | 0.13043999660500 |
| 0.37500000000400 | 0.41666999457100 | 0.13043999660500 |
| 0.87500000009500 | 0.08332999798400 | 0.13043999660500 |
| 0.87500000009500 | 0.74999999984900 | 0.13043999660500 |

|                  |                  |                  |
|------------------|------------------|------------------|
| 0.87500000009500 | 0.41666999457100 | 0.13043999660500 |
| 0.12500000002200 | 0.08332999798400 | 0.13043999660500 |
| 0.12500000002200 | 0.7499999984900  | 0.13043999660500 |
| 0.12500000002200 | 0.41666999457100 | 0.13043999660500 |
| 0.6249999998400  | 0.08332999798400 | 0.13043999660500 |
| 0.6249999998400  | 0.7499999984900  | 0.13043999660500 |
| 0.6249999998400  | 0.41666999457100 | 0.13043999660500 |
| 0.00029139246374 | 0.24771470659400 | 0.19685970977400 |
| 0.99977797842700 | 0.91456172578500 | 0.19687082308900 |
| 0.99985397119600 | 0.58115486894200 | 0.19691208321700 |
| 0.50007608715300 | 0.24745647958500 | 0.19678916858900 |
| 0.49957665732700 | 0.91428438471500 | 0.19697390860700 |
| 0.50015872241800 | 0.58211081069800 | 0.19634775500400 |
| 0.25036654524500 | 0.24834000425900 | 0.19714152772100 |
| 0.25007831561100 | 0.91438257477400 | 0.19672790252500 |
| 0.25019677638200 | 0.58124010520900 | 0.19706759075100 |
| 0.75031626280100 | 0.24752470577100 | 0.19679304136300 |
| 0.74958786886100 | 0.91437462802400 | 0.19692444985300 |
| 0.74945836491000 | 0.58060784597700 | 0.19679067539300 |
| 0.37483467220000 | 0.09294537370470 | 0.27107641233100 |
| 0.37424123274100 | 0.75679604473300 | 0.26871906781100 |
| 0.37660994080600 | 0.42656790395700 | 0.27063457504200 |
| 0.87505150548400 | 0.09310597693760 | 0.27109834323200 |
| 0.87428356426800 | 0.75971967557400 | 0.27100078170900 |
| 0.87552984013600 | 0.42634687151300 | 0.27099983304300 |
| 0.12516175934700 | 0.09308401278390 | 0.27108817883600 |
| 0.12332629847600 | 0.76038998060000 | 0.27118201138000 |
| 0.12515504928200 | 0.42697954336200 | 0.27110346094400 |
| 0.62499284706300 | 0.09294821790360 | 0.27107224978300 |
| 0.62277899905100 | 0.75582641561500 | 0.26925330714900 |

|                  |                  |                  |
|------------------|------------------|------------------|
| 0.62602591115100 | 0.42587065402900 | 0.27100520988900 |
| 0.58086906776600 | 0.68090505341300 | 0.38271603163300 |
| 0.62308051488600 | 0.49081038215600 | 0.37744941401700 |
| 0.67862108041400 | 0.73083820765200 | 0.34504284104100 |
| 0.49929772000900 | 0.72956640914100 | 0.37385034570200 |
| 0.50668250641100 | 0.63775296181700 | 0.34542804568100 |
| 0.52972762646700 | 0.82562988130200 | 0.33478145314000 |
| 0.43521284019300 | 0.81408774117100 | 0.33518039517200 |
| 0.70646477939500 | 0.74346673077000 | 0.39398114218400 |
| 0.46441503742100 | 0.56185071863000 | 0.30995498161500 |
| 0.61577314409700 | 0.50180532627900 | 0.40122253937800 |
| 0.58027110392800 | 0.68101500607700 | 0.87844653115600 |
| 0.62323645450400 | 0.49166742118700 | 0.88357548660300 |
| 0.67838575530200 | 0.73075558670600 | 0.91606932642500 |
| 0.49931471145400 | 0.73017035097500 | 0.88783459688800 |
| 0.50613635919800 | 0.63790140505300 | 0.91572383657900 |
| 0.53098713991300 | 0.82466971253500 | 0.92774125293500 |
| 0.43621435234900 | 0.81456575686300 | 0.92698734877400 |
| 0.70628349937200 | 0.74335460371300 | 0.86714489881200 |
| 0.46404584768900 | 0.56175727170400 | 0.95115299252800 |
| 0.61633273505600 | 0.50248648439400 | 0.85974060665100 |
| 0.67894755819600 | 0.70635713264600 | 0.37456772104400 |
| 0.51917799720800 | 0.67441550463400 | 0.37990486936700 |
| 0.48333730857200 | 0.81810845760900 | 0.35531056964500 |
| 0.49734756160100 | 0.60970902793800 | 0.30989612061400 |
| 0.67870272754500 | 0.70625774724600 | 0.88654074925900 |
| 0.51857033021200 | 0.67492810798500 | 0.88139598652600 |
| 0.48464470335200 | 0.81840980077400 | 0.90703513096900 |
| 0.49719554824300 | 0.60948866182100 | 0.95122215701300 |

### 3) Small supercell 2-H<sup>+</sup><sub>sol</sub> IS

POSCAR

1

|                    |                    |                    |
|--------------------|--------------------|--------------------|
| 16.22839453087127  | 0.0000000000000000 | 0.0000000000000000 |
| 0.0000000000000000 | 17.21281173080250  | 0.0000000000000000 |
| 0.0000000000000000 | 0.0000000000000000 | 30.38812200000589  |

|    |    |    |    |
|----|----|----|----|
| Al | As | H  | O  |
| 60 | 60 | 38 | 16 |

Direct

|                    |                    |                  |
|--------------------|--------------------|------------------|
| 0.00047880809497   | 0.02977628751330   | 0.01552709696070 |
| 0.99827077902000   | 0.67084400420700   | 0.00732954744188 |
| 0.00117660759187   | 0.35925397009600   | 0.01530215327120 |
| 0.50008468720600   | 0.03040218637770   | 0.01487377012360 |
| 0.49440589118900   | 0.66959699560700   | 0.00759952862803 |
| 0.48661170082100   | 0.31265706139500   | 0.97887885504200 |
| 0.25129663884700   | 0.02940734626640   | 0.01482776381690 |
| 0.24733959021800   | 0.68772896268200   | 0.01552740651040 |
| 0.25156658809400   | 0.36905369894900   | 0.01268002145790 |
| 0.74924155822700   | 0.02839135047470   | 0.01506433693520 |
| 0.74823973755200   | 0.69078237487300   | 0.01468285692500 |
| 0.75826933367700   | 0.35984634927500   | 0.01602585619510 |
| 0.37974275510100   | 0.16829167274300   | 0.06172725236240 |
| 0.37558188413400   | 0.83076726596700   | 0.06191871765620 |
| 0.37539642446900   | 0.49053473262000   | 0.06063582219870 |
| 0.87511664380000   | 0.16297377426800   | 0.06101732132150 |
| 0.87557267808100   | 0.82955502152600   | 0.06118889088940 |
| 0.87536614130800   | 0.49639768684300   | 0.06230738604500 |
| 0.12815667871300   | 0.16517106058600   | 0.06089214005250 |
| 0.12483198696000   | 0.83172660357500   | 0.06208684278640 |
| 0.12484620302100   | 0.49684503993200   | 0.06263207540990 |
| 0.61906755083200   | 0.16610435132500   | 0.06116825299360 |
| 0.62407242988100   | 0.83085737358800   | 0.06157272153730 |
| 0.62541493435500   | 0.49672149636000   | 0.06321769199620 |
| 0.0000000000000000 | 0.0000000000000000 | 0.13043999660500 |
| 0.0000000000000000 | 0.66667002414000   | 0.13043999660500 |
| 0.0000000000000000 | 0.33333000540000   | 0.13043999660500 |
| 0.50000000002500   | 0.0000000000000000 | 0.13043999660500 |
| 0.50000000002500   | 0.66667002414000   | 0.13043999660500 |
| 0.50000000002500   | 0.33333000540000   | 0.13043999660500 |
| 0.24999999998000   | 0.0000000000000000 | 0.13043999660500 |
| 0.24999999998000   | 0.66667002414000   | 0.13043999660500 |
| 0.24999999998000   | 0.33333000540000   | 0.13043999660500 |
| 0.75000000026600   | 0.0000000000000000 | 0.13043999660500 |
| 0.75000000026600   | 0.66667002414000   | 0.13043999660500 |



|                  |                  |                  |
|------------------|------------------|------------------|
| 0.75000000026600 | 0.33333000540000 | 0.13043999660500 |
| 0.37974064636100 | 0.16824022586800 | 0.19916497020600 |
| 0.37559999278500 | 0.83075515966400 | 0.19896090333600 |
| 0.37533550617600 | 0.49068792279700 | 0.20021990949700 |
| 0.87516723272900 | 0.16300005420300 | 0.19985113297300 |
| 0.87563375741400 | 0.82956981066300 | 0.19969429049300 |
| 0.87552135642500 | 0.49651687495900 | 0.19858231354800 |
| 0.12815083112100 | 0.16517502689500 | 0.19997888487400 |
| 0.12484825952000 | 0.83169922268900 | 0.19883730691800 |
| 0.12488379368600 | 0.49697311902800 | 0.19825469818000 |
| 0.61912280496400 | 0.16608290376800 | 0.19970977992100 |
| 0.62414214180500 | 0.83085975980600 | 0.19929087816800 |
| 0.62544469327000 | 0.49680619217200 | 0.19764905078600 |
| 0.00052588543609 | 0.02984345617930 | 0.24531680609900 |
| 0.99859214210800 | 0.67092901184600 | 0.25381256951500 |
| 0.00122791478244 | 0.35934844958200 | 0.24559690454400 |
| 0.50011955051600 | 0.03040582945450 | 0.24597530192800 |
| 0.49444471957100 | 0.66985152787600 | 0.25329022571800 |
| 0.48664924307700 | 0.31273786473500 | 0.28186551001800 |
| 0.25132587439700 | 0.02940480293630 | 0.24603736492500 |
| 0.24740035154100 | 0.68809293987600 | 0.24553662943900 |
| 0.25158660043400 | 0.36904263027000 | 0.24817771222000 |
| 0.74929566090300 | 0.02838238269580 | 0.24581865700900 |
| 0.74827448914200 | 0.69079309126500 | 0.24626444274300 |
| 0.75837482440400 | 0.35989334030200 | 0.24483365168400 |
| 0.37555341328500 | 0.09632115803120 | 0.98986150266500 |
| 0.37333935101100 | 0.75222203948200 | 0.99237547904400 |
| 0.37752434729200 | 0.42708349494700 | 0.98822381840800 |
| 0.87479077741600 | 0.09324039377910 | 0.98952446848000 |
| 0.87578659186900 | 0.75179623478500 | 0.99074961990100 |
| 0.87904468026600 | 0.42856572690500 | 0.98936246384800 |
| 0.12565891266900 | 0.09405891749730 | 0.98957320665800 |
| 0.12093152362300 | 0.75280297435700 | 0.99198423304300 |
| 0.12139635581100 | 0.43032764960700 | 0.98972564898700 |
| 0.62523567823100 | 0.09478868724070 | 0.98941337383400 |
| 0.61860098891700 | 0.75098839715700 | 0.99128461478000 |
| 0.62007323794500 | 0.40632422501700 | 0.99821666710800 |
| 0.00060949508577 | 0.24738803835400 | 0.06450616006350 |
| 0.99970503464700 | 0.91469643782100 | 0.06350879800630 |
| 0.99977537856300 | 0.57915329258200 | 0.06736367021890 |
| 0.50062250709400 | 0.25653916454200 | 0.06075213923670 |
| 0.49991781498000 | 0.91509065707700 | 0.06325572433620 |
| 0.49882044819700 | 0.57711192468200 | 0.06711027887950 |
| 0.25136854070100 | 0.25311502128200 | 0.06217899568870 |

|                  |                  |                  |
|------------------|------------------|------------------|
| 0.25042648925500 | 0.91443958305000 | 0.06328021277580 |
| 0.25115707169100 | 0.57881622369700 | 0.06553494668190 |
| 0.75016799715500 | 0.24736769496000 | 0.06456270586700 |
| 0.75022187386800 | 0.91321792813900 | 0.06322773342180 |
| 0.75018516619300 | 0.58059560260300 | 0.06458400690340 |
| 0.37500000000400 | 0.08332999798400 | 0.13043999660500 |
| 0.37500000000400 | 0.74999999984900 | 0.13043999660500 |
| 0.37500000000400 | 0.41666999457100 | 0.13043999660500 |
| 0.87500000009500 | 0.08332999798400 | 0.13043999660500 |
| 0.87500000009500 | 0.74999999984900 | 0.13043999660500 |
| 0.87500000009500 | 0.41666999457100 | 0.13043999660500 |
| 0.12500000002200 | 0.08332999798400 | 0.13043999660500 |
| 0.12500000002200 | 0.74999999984900 | 0.13043999660500 |
| 0.12500000002200 | 0.41666999457100 | 0.13043999660500 |
| 0.62499999998400 | 0.08332999798400 | 0.13043999660500 |
| 0.62499999998400 | 0.74999999984900 | 0.13043999660500 |
| 0.62499999998400 | 0.41666999457100 | 0.13043999660500 |
| 0.00063425700619 | 0.24744138198900 | 0.19639926881900 |
| 0.99974806370200 | 0.91470937029000 | 0.19737383771500 |
| 0.99988068944200 | 0.57941623011000 | 0.19364424318100 |
| 0.50063616750600 | 0.25646804843100 | 0.20008460802500 |
| 0.49995784773500 | 0.91506545828400 | 0.19761463286200 |
| 0.49883481288300 | 0.57725480142600 | 0.19380982417500 |
| 0.25138749695500 | 0.25307546849000 | 0.19868661144600 |
| 0.25044432923900 | 0.91443518013100 | 0.19758774277700 |
| 0.25115519265900 | 0.57912807063700 | 0.19548684260300 |
| 0.75019963829400 | 0.24737005924100 | 0.19631713461200 |
| 0.75027990843700 | 0.91321269765500 | 0.19765621011800 |
| 0.75025624449000 | 0.58066987852000 | 0.19633365801900 |
| 0.37559098973100 | 0.09627483976930 | 0.27104311460500 |
| 0.37349175602700 | 0.75258560739900 | 0.26861864280800 |
| 0.37756058781500 | 0.42710970621500 | 0.27259344758000 |
| 0.87482990809700 | 0.09325174894520 | 0.27134517925200 |
| 0.87588228530000 | 0.75175434295900 | 0.27015130309200 |
| 0.87909781723400 | 0.42868242925800 | 0.27151973347800 |
| 0.12570772455000 | 0.09406133138180 | 0.27130978023300 |
| 0.12098606193300 | 0.75321133100800 | 0.26910243018600 |
| 0.12148799185400 | 0.43039487207800 | 0.27115207258700 |
| 0.62526960719300 | 0.09475074227320 | 0.27147121637400 |
| 0.61873349972400 | 0.75113746537200 | 0.26962688941700 |
| 0.62012979098600 | 0.40630962501900 | 0.26259430208100 |
| 0.57261051702600 | 0.68176838914700 | 0.38018768325200 |
| 0.64481467656900 | 0.46555013860600 | 0.29888236738500 |
| 0.66996086531200 | 0.71267994129300 | 0.34113956408100 |

|                  |                  |                  |
|------------------|------------------|------------------|
| 0.49391568019200 | 0.74604537619600 | 0.36495582081400 |
| 0.49153652883700 | 0.64354056654200 | 0.35793150317700 |
| 0.53341133459500 | 0.81699207973400 | 0.32786304448200 |
| 0.43704819677400 | 0.80623012171600 | 0.32657658230100 |
| 0.70141178313200 | 0.71842425037600 | 0.39037237412700 |
| 0.43728113032400 | 0.54591803200900 | 0.29817798910300 |
| 0.53366943968100 | 0.55007608263700 | 0.30222148257500 |
| 0.57351331115500 | 0.67976287277200 | 0.88035195697100 |
| 0.64489897847600 | 0.46557136870200 | 0.96196352142500 |
| 0.67039169622200 | 0.71261582428300 | 0.91985692325200 |
| 0.49395048808600 | 0.74308419786200 | 0.89541870945100 |
| 0.49285323107900 | 0.64062551749900 | 0.90249161381800 |
| 0.53284391074100 | 0.81389226420000 | 0.93257900068700 |
| 0.43650501762300 | 0.80284682566400 | 0.93388726320200 |
| 0.70234187843600 | 0.71869339086700 | 0.87075636048200 |
| 0.43738074050700 | 0.54560773028200 | 0.96260802124500 |
| 0.53380233719600 | 0.54962298285500 | 0.95887402044800 |
| 0.09690271676090 | 0.68026988928100 | 0.37966597868200 |
| 0.18681215915400 | 0.72288149145900 | 0.33964846812200 |
| 0.00941039096952 | 0.73300910973400 | 0.36722656562900 |
| 0.02040539300160 | 0.63406576490400 | 0.35666877841200 |
| 0.03764991464440 | 0.81004868061100 | 0.33003612416500 |
| 0.94236911101100 | 0.79577284812100 | 0.33147925392300 |
| 0.21849918577900 | 0.73642779697000 | 0.38829537982700 |
| 0.95379801028300 | 0.54887317505500 | 0.30092132593700 |
| 0.05000234406150 | 0.54575532225300 | 0.29711227002700 |
| 0.09649939881160 | 0.67639871877000 | 0.88250000192000 |
| 0.18616585433500 | 0.71883540849500 | 0.92204276388300 |
| 0.01005126402900 | 0.73044877416700 | 0.89423254838300 |
| 0.01894219686480 | 0.63197317083500 | 0.90581138340400 |
| 0.03917927907300 | 0.80875057549600 | 0.93112618870800 |
| 0.94370480218200 | 0.79606168707700 | 0.92926707558600 |
| 0.21822528501200 | 0.72937345249100 | 0.87321374354100 |
| 0.95342066248400 | 0.54814766733600 | 0.96021844778900 |
| 0.04970901689270 | 0.54518752195100 | 0.96393036877600 |
| 0.66623346579000 | 0.68770526398300 | 0.37084281638200 |
| 0.50878275565500 | 0.68334902127800 | 0.37982610799400 |
| 0.48500674871400 | 0.81204778340800 | 0.34818615009800 |
| 0.48482142888000 | 0.58436406587900 | 0.30443195160500 |
| 0.66723484438200 | 0.68763722916800 | 0.89014232493300 |
| 0.50972246575300 | 0.68045120908300 | 0.88049640230300 |
| 0.48448232137100 | 0.80870444307200 | 0.91221324804800 |
| 0.48503291822200 | 0.58395759849100 | 0.95635061124800 |
| 0.18797161257100 | 0.69982833678300 | 0.36983601355100 |

|                  |                  |                  |
|------------------|------------------|------------------|
| 0.03328969607190 | 0.67339341672200 | 0.37987904637500 |
| 0.99204299331300 | 0.80083375714900 | 0.35165626967700 |
| 0.00340435513273 | 0.58366328487300 | 0.30410955363500 |
| 0.18742666568200 | 0.69397617455900 | 0.89229230584700 |
| 0.03263200277670 | 0.67064544907600 | 0.88227477571700 |
| 0.99369725591700 | 0.79994333824500 | 0.90934936779300 |
| 0.00298111309266 | 0.58302115850200 | 0.95692989373800 |

#### 4) Small supercell 2-H<sup>+</sup><sub>sol</sub> FS

POSCAR

1

|                   |                   |                   |
|-------------------|-------------------|-------------------|
| 16.22839453087127 | 0.00000000000000  | 0.00000000000000  |
| 0.00000000000000  | 17.21281173080250 | 0.00000000000000  |
| 0.00000000000000  | 0.00000000000000  | 30.38812200000589 |

Al As H O

60 60 38 16

Direct

|                  |                  |                  |
|------------------|------------------|------------------|
| 0.99999920312300 | 0.02810744454740 | 0.01480866568810 |
| 0.99869602825300 | 0.67076969210200 | 0.00733834803174 |
| 0.00014426283200 | 0.35937394464200 | 0.01511840427070 |
| 0.49996930903100 | 0.02726765858440 | 0.01478947806990 |
| 0.49786306447400 | 0.67101306698400 | 0.00129344973508 |
| 0.50167047879900 | 0.35861157113600 | 0.01458114702810 |
| 0.25012618901300 | 0.02717711040050 | 0.01468629281260 |
| 0.25135339211400 | 0.69031846343100 | 0.01473445600570 |
| 0.25211426652500 | 0.36271798237800 | 0.01410104703330 |
| 0.75004255129100 | 0.02657299571030 | 0.01477851022010 |
| 0.74653677500200 | 0.68900230817100 | 0.01313226734250 |
| 0.74915144608000 | 0.36112648708400 | 0.01435124484020 |
| 0.37464965150600 | 0.16329366563500 | 0.06080961504490 |
| 0.37496525515300 | 0.83013387358600 | 0.06176739000700 |
| 0.37753001897300 | 0.49688696928400 | 0.06187824600170 |

|                  |                  |                  |
|------------------|------------------|------------------|
| 0.87492184763700 | 0.16286287742300 | 0.06082890350410 |
| 0.87568604775600 | 0.82909212507600 | 0.06111259858990 |
| 0.87457224038000 | 0.49657024527900 | 0.06225636776220 |
| 0.12569746121800 | 0.16322487262400 | 0.06079649076370 |
| 0.12470402629100 | 0.83141901588400 | 0.06205313929640 |
| 0.12507235066000 | 0.49652782900400 | 0.06239431568200 |
| 0.62574893396900 | 0.16314085041200 | 0.06083143937700 |
| 0.62485126014200 | 0.83049485226700 | 0.06153004384450 |
| 0.62295754551600 | 0.49628846621900 | 0.06143992234950 |
| 0.00000000000000 | 0.00000000000000 | 0.13043999660500 |
| 0.00000000000000 | 0.66667002414000 | 0.13043999660500 |
| 0.00000000000000 | 0.33333000540000 | 0.13043999660500 |
| 0.50000000002500 | 0.00000000000000 | 0.13043999660500 |
| 0.50000000002500 | 0.66667002414000 | 0.13043999660500 |
| 0.50000000002500 | 0.33333000540000 | 0.13043999660500 |
| 0.24999999998000 | 0.00000000000000 | 0.13043999660500 |
| 0.24999999998000 | 0.66667002414000 | 0.13043999660500 |
| 0.24999999998000 | 0.33333000540000 | 0.13043999660500 |
| 0.75000000026600 | 0.00000000000000 | 0.13043999660500 |
| 0.75000000026600 | 0.66667002414000 | 0.13043999660500 |
| 0.75000000026600 | 0.33333000540000 | 0.13043999660500 |
| 0.37465949344800 | 0.16330066322000 | 0.20003739071000 |
| 0.37494509551500 | 0.83008896130500 | 0.19917772690600 |
| 0.37754451972500 | 0.49692778659500 | 0.19899990472300 |
| 0.87491622140200 | 0.16288792574000 | 0.20001919318900 |
| 0.87567943635500 | 0.82919626536300 | 0.19972848465200 |
| 0.87448210103500 | 0.49651584342000 | 0.19857415994700 |
| 0.12571281187700 | 0.16324561896000 | 0.20004895235700 |
| 0.12470560752600 | 0.83128255502600 | 0.19887876427900 |
| 0.12516482132200 | 0.49642799835600 | 0.19848481257700 |

|                  |                  |                  |
|------------------|------------------|------------------|
| 0.62574526785000 | 0.16313453488900 | 0.20002697976900 |
| 0.62484032639700 | 0.83039208693600 | 0.19943572078000 |
| 0.62281060798100 | 0.49630717860500 | 0.19942331374500 |
| 0.00003327984462 | 0.02808198870140 | 0.24609240922600 |
| 0.99856804865500 | 0.67049269002900 | 0.25330871693400 |
| 0.00021050209460 | 0.35934155437200 | 0.24574917750100 |
| 0.49996627594900 | 0.02735045513090 | 0.24600911908000 |
| 0.49789677435600 | 0.67117285097100 | 0.25978084384600 |
| 0.50160580190700 | 0.35861139200400 | 0.24632411186300 |
| 0.25011533823700 | 0.02713091945540 | 0.24620413973200 |
| 0.25139976924600 | 0.69036496874200 | 0.24612381183200 |
| 0.25212897920700 | 0.36269460016300 | 0.24679822957300 |
| 0.75004712775500 | 0.02661139494860 | 0.24609674824400 |
| 0.74620062121300 | 0.68894030613000 | 0.24768981318800 |
| 0.74905278856000 | 0.36114774558300 | 0.24653103571300 |
| 0.37493911410000 | 0.09302824266830 | 0.98931851925700 |
| 0.37465350132000 | 0.75693703472600 | 0.99190707740200 |
| 0.37785981143100 | 0.42771471190900 | 0.98947577069700 |
| 0.87477439829600 | 0.09288942583110 | 0.98927063054400 |
| 0.87575777987100 | 0.75091278491900 | 0.99115571186800 |
| 0.87642512834800 | 0.42744990907200 | 0.98999705594000 |
| 0.12519655207600 | 0.09310346051870 | 0.98925711537300 |
| 0.12188031033300 | 0.75242035546200 | 0.99247786182700 |
| 0.12401792858800 | 0.42770417106700 | 0.99001152474400 |
| 0.62529658622900 | 0.09262611719730 | 0.98938687297000 |
| 0.62169627620100 | 0.75652864733000 | 0.99118350032400 |
| 0.62494829356900 | 0.42708793843700 | 0.98923705932600 |
| 0.00023849227535 | 0.24742545318100 | 0.06437659962210 |
| 0.99963298515000 | 0.91441117926500 | 0.06369765911390 |
| 0.99990652726400 | 0.57856368954900 | 0.06722096182000 |

|                  |                  |                  |
|------------------|------------------|------------------|
| 0.50021396528300 | 0.24713064028200 | 0.06440183988560 |
| 0.49985232920000 | 0.91444391991000 | 0.06404735563420 |
| 0.50017450574000 | 0.58227270481600 | 0.06468952508090 |
| 0.24991834119900 | 0.24950670494800 | 0.06349689940220 |
| 0.24999157942700 | 0.91425710007600 | 0.06393710134480 |
| 0.25049190915300 | 0.57976018121500 | 0.06475255655350 |
| 0.75086558553200 | 0.24857224931400 | 0.06385765115140 |
| 0.75068610738300 | 0.91336035880800 | 0.06384069960610 |
| 0.74906096442300 | 0.58010766674500 | 0.06456417647940 |
| 0.37500000000400 | 0.08332999798400 | 0.13043999660500 |
| 0.37500000000400 | 0.74999999984900 | 0.13043999660500 |
| 0.37500000000400 | 0.41666999457100 | 0.13043999660500 |
| 0.87500000009500 | 0.08332999798400 | 0.13043999660500 |
| 0.87500000009500 | 0.74999999984900 | 0.13043999660500 |
| 0.87500000009500 | 0.41666999457100 | 0.13043999660500 |
| 0.12500000002200 | 0.08332999798400 | 0.13043999660500 |
| 0.12500000002200 | 0.74999999984900 | 0.13043999660500 |
| 0.12500000002200 | 0.41666999457100 | 0.13043999660500 |
| 0.62499999998400 | 0.08332999798400 | 0.13043999660500 |
| 0.62499999998400 | 0.74999999984900 | 0.13043999660500 |
| 0.62499999998400 | 0.41666999457100 | 0.13043999660500 |
| 0.00024698183367 | 0.24742265323400 | 0.19649193759800 |
| 0.99970413047300 | 0.91438708422100 | 0.19720734279700 |
| 0.99991460608700 | 0.57828707733500 | 0.19347914332500 |
| 0.50021874181300 | 0.24715122565800 | 0.19648341281400 |
| 0.49984710291400 | 0.91439715113700 | 0.19684341011400 |
| 0.50012155430500 | 0.58244309504600 | 0.19631938594500 |
| 0.24993200488800 | 0.24951634098000 | 0.19737867998200 |
| 0.24995653538600 | 0.91419619940700 | 0.19696673202800 |
| 0.25050891915100 | 0.57977375285800 | 0.19611656007800 |

|                  |                  |                  |
|------------------|------------------|------------------|
| 0.75085527063300 | 0.24859038488200 | 0.19703080014000 |
| 0.75063500677600 | 0.91336431146600 | 0.19705964469500 |
| 0.74894200390300 | 0.58003137863000 | 0.19627566547200 |
| 0.37493167637800 | 0.09301666459840 | 0.27153431693700 |
| 0.37461999008400 | 0.75700530318500 | 0.26913289145700 |
| 0.37783080889200 | 0.42774626368100 | 0.27141688992500 |
| 0.87480018634000 | 0.09290974075500 | 0.27158441010500 |
| 0.87562223776700 | 0.75060192574800 | 0.26949515946200 |
| 0.87641947757000 | 0.42736433251900 | 0.27084277507800 |
| 0.12521909950500 | 0.09313893398650 | 0.27159929294900 |
| 0.12171309373300 | 0.75206952025800 | 0.26841285513400 |
| 0.12404390246300 | 0.42765009458800 | 0.27090711403600 |
| 0.62528072661000 | 0.09263722539640 | 0.27148940498800 |
| 0.62167569615100 | 0.75667523962300 | 0.26992295536700 |
| 0.62487807882200 | 0.42710974178100 | 0.27164681398500 |
| 0.58095158729400 | 0.68054611258600 | 0.38266297313300 |
| 0.62303605144500 | 0.49027111747200 | 0.37748807812000 |
| 0.67827658330300 | 0.72873016180600 | 0.34477851815500 |
| 0.49987177423900 | 0.72972623997100 | 0.37342208848200 |
| 0.50668250641100 | 0.63775296181700 | 0.34542804568000 |
| 0.53017887355500 | 0.82723919714100 | 0.33588550248800 |
| 0.43631401629900 | 0.81314918418400 | 0.33407365159600 |
| 0.70280710955500 | 0.74690197433100 | 0.39364132093500 |
| 0.46598508160200 | 0.56089105813200 | 0.30963308538200 |
| 0.61645395232000 | 0.50184211054300 | 0.40123871133700 |
| 0.58035983334400 | 0.68055165079900 | 0.87856629932800 |
| 0.62316288757500 | 0.49115040894500 | 0.88357429276100 |
| 0.67764097995900 | 0.72891541915600 | 0.91648876369000 |
| 0.49993786219400 | 0.73035243136400 | 0.88822173427500 |
| 0.50613635919800 | 0.63790140505300 | 0.91572383657900 |



|                  |                  |                  |
|------------------|------------------|------------------|
| 0.53196416195000 | 0.82596142889800 | 0.92655815852700 |
| 0.43769355746700 | 0.81387732487500 | 0.92790052430600 |
| 0.70278937573300 | 0.74625719577000 | 0.86761875024300 |
| 0.46553046416700 | 0.56083267853700 | 0.95150347625000 |
| 0.61703482358800 | 0.50254798773600 | 0.85976219155400 |
| 0.09470522816490 | 0.67942351374000 | 0.37919870512000 |
| 0.18816809401900 | 0.71565497552200 | 0.33853666869000 |
| 0.00991827006890 | 0.73767719992000 | 0.36610460301700 |
| 0.01510548640140 | 0.63697774539800 | 0.35786464841200 |
| 0.04059557350010 | 0.81091707531500 | 0.32735505620800 |
| 0.94473410704400 | 0.79844286738700 | 0.32949614942600 |
| 0.22756133313600 | 0.71278875152000 | 0.38628765659000 |
| 0.95249684645400 | 0.54814680730700 | 0.30022456348000 |
| 0.04895401489130 | 0.54671130541400 | 0.29789375394500 |
| 0.09703574139200 | 0.68242961424300 | 0.88164643182600 |
| 0.18888394008700 | 0.72081690484100 | 0.92212010886100 |
| 0.01122443734730 | 0.73899071549100 | 0.89449805598600 |
| 0.01750933106030 | 0.63864062772700 | 0.90262068011900 |
| 0.04088749969910 | 0.81261589100600 | 0.93343495691000 |
| 0.94515769646300 | 0.79985772811400 | 0.93106964313300 |
| 0.22804412095100 | 0.71997163104800 | 0.87420352650500 |
| 0.95308953093500 | 0.54887884183000 | 0.95993806316700 |
| 0.04945957896630 | 0.54704722575600 | 0.96285212299700 |
| 0.67923934447200 | 0.70637671458900 | 0.37494266635300 |
| 0.51917799720800 | 0.67441550463400 | 0.37990486936800 |
| 0.48265542645500 | 0.81791248210700 | 0.35542996010000 |
| 0.49734756160100 | 0.60970902793800 | 0.30989612061500 |
| 0.67889322189900 | 0.70610484824900 | 0.88644846506900 |
| 0.51857033021300 | 0.67492810798500 | 0.88139598652600 |
| 0.48441008335400 | 0.81822803462000 | 0.90677266608900 |

|                  |                  |                  |
|------------------|------------------|------------------|
| 0.49719554824300 | 0.60948866182200 | 0.95122215701300 |
| 0.18644449437900 | 0.68804606255300 | 0.36736375264500 |
| 0.03074733057900 | 0.67713928168400 | 0.37994414526500 |
| 0.99479189279800 | 0.80443930736100 | 0.34929212636400 |
| 0.00159773296503 | 0.58350829703800 | 0.30395320406200 |
| 0.18816425001600 | 0.69359820685200 | 0.89314550014300 |
| 0.03306355632270 | 0.67907288770500 | 0.88068408732700 |
| 0.99532472228000 | 0.80583898605500 | 0.91141042992500 |
| 0.00237675852637 | 0.58403585723800 | 0.95655920993800 |

### 5) Large supercell 1-H<sub>sol</sub><sup>+</sup> IS

POSCAR

1

|                    |                    |                    |
|--------------------|--------------------|--------------------|
| 48.68518359261381  | 0.0000000000000000 | 0.0000000000000000 |
| 0.0000000000000000 | 30.38812200000589  | 0.0000000000000000 |
| 0.0000000000000000 | 0.0000000000000000 | 51.63843519240750  |

Al As H O

540 540 180 72

Direct

|                  |                  |                  |
|------------------|------------------|------------------|
| 0.00012221833611 | 0.01371322244870 | 0.00869935446779 |
| 0.00012287084608 | 0.01371350296340 | 0.34203298234700 |
| 0.00012291466973 | 0.01371316405610 | 0.67536577553600 |
| 0.33345684874500 | 0.01371305297400 | 0.00869912304630 |
| 0.33345575518700 | 0.01371318010930 | 0.34203253680500 |
| 0.33345682262100 | 0.01371384486320 | 0.67536631952600 |
| 0.66678987054800 | 0.01371351577690 | 0.00869952879602 |
| 0.66679027060700 | 0.01371297571510 | 0.34203248577800 |
| 0.66678916721100 | 0.01371395553780 | 0.67536627950500 |
| 0.33285587661200 | 0.01388298333080 | 0.23053747561500 |
| 0.33285578899300 | 0.01388346883000 | 0.56387156382800 |

|                  |                  |                  |
|------------------|------------------|------------------|
| 0.33285637801200 | 0.01388293899110 | 0.89720386336600 |
| 0.66618966861500 | 0.01388287881970 | 0.23053686228100 |
| 0.66618924748400 | 0.01388382198500 | 0.56387151509600 |
| 0.66618906438800 | 0.01388315285500 | 0.89720425705200 |
| 0.99952211692900 | 0.01388297293570 | 0.23053768149000 |
| 0.99952253194200 | 0.01388318364150 | 0.56387067764600 |
| 0.99952225256000 | 0.01388297031160 | 0.89720440522700 |
| 0.00048006995489 | 0.01350277236500 | 0.11930501493200 |
| 0.00048109259814 | 0.01350322882820 | 0.45263855681800 |
| 0.00048101508274 | 0.01350283638350 | 0.78597182122400 |
| 0.33381511855800 | 0.01350282125970 | 0.11930507169000 |
| 0.33381367417200 | 0.01350299934050 | 0.45263877442500 |
| 0.33381528419700 | 0.01350320901780 | 0.78597167265700 |
| 0.66714831845500 | 0.01350310795350 | 0.11930481649000 |
| 0.66714856785900 | 0.01350324132710 | 0.45263893101000 |
| 0.66714716565300 | 0.01350318277580 | 0.78597183785700 |
| 0.16655661626500 | 0.01330570110520 | 0.00949181629107 |
| 0.16655641583000 | 0.01330656410640 | 0.34282687355500 |
| 0.16655674453900 | 0.01330591634190 | 0.67615935565800 |
| 0.49989019879600 | 0.01330612610010 | 0.00949295862011 |
| 0.49989008555000 | 0.01330505562060 | 0.34282488524400 |
| 0.49989001719100 | 0.01330744464220 | 0.67616105675000 |
| 0.83322295305200 | 0.01330653446770 | 0.00949421531107 |
| 0.83322330243300 | 0.01330605773680 | 0.34282657340100 |
| 0.83322302736600 | 0.01330605690500 | 0.67615921957800 |
| 0.16473250200500 | 0.00785979844442 | 0.22344859238100 |
| 0.16473243003400 | 0.00785993423518 | 0.55678068818800 |
| 0.16473259637800 | 0.00785952427398 | 0.89011405705000 |
| 0.49806603631800 | 0.00785960258355 | 0.22344686935500 |
| 0.49806612598700 | 0.00786016647927 | 0.55678253310400 |

|                  |                  |                  |
|------------------|------------------|------------------|
| 0.49806595039300 | 0.00785986996720 | 0.89011339572500 |
| 0.83139897486800 | 0.00786004686960 | 0.22344667085600 |
| 0.83139906722300 | 0.00785988901126 | 0.55678060523400 |
| 0.83139893574700 | 0.00785984482695 | 0.89011484372700 |
| 0.16220390027400 | 0.97887885504100 | 0.10421902046400 |
| 0.16220390027400 | 0.97887885504100 | 0.43755235379800 |
| 0.16220390027400 | 0.97887885504100 | 0.77088568713200 |
| 0.49553723360600 | 0.97887885504100 | 0.10421902046400 |
| 0.49553723360600 | 0.97887885504100 | 0.43755235379800 |
| 0.49553723360600 | 0.97887885504100 | 0.77088568713200 |
| 0.82887056694000 | 0.97887885504100 | 0.10421902046400 |
| 0.82887056694000 | 0.97887885504100 | 0.43755235379800 |
| 0.82887056694000 | 0.97887885504100 | 0.77088568713200 |
| 0.08348843363620 | 0.01371180714430 | 0.00892036681869 |
| 0.08348916267910 | 0.01371244524930 | 0.34225471362500 |
| 0.08348910748680 | 0.01371192919400 | 0.67558727442300 |
| 0.41682300217400 | 0.01371209582780 | 0.00892088046872 |
| 0.41682176011400 | 0.01371142358280 | 0.34225341320300 |
| 0.41682318122600 | 0.01371306220520 | 0.67558852804100 |
| 0.75015620000300 | 0.01371259086010 | 0.00892163520410 |
| 0.75015625027500 | 0.01371201152580 | 0.34225434144400 |
| 0.75015534596400 | 0.01371234658720 | 0.67558751020100 |
| 0.08102951770270 | 0.01395281259250 | 0.22933907706700 |
| 0.08102991972460 | 0.01395297585550 | 0.56267144166400 |
| 0.08102976405030 | 0.01395268463810 | 0.89600503815000 |
| 0.41436327172700 | 0.01395244713030 | 0.22933775594400 |
| 0.41436317360000 | 0.01395340114150 | 0.56267310920800 |
| 0.41436379087800 | 0.01395276320550 | 0.89600433625000 |
| 0.74769702033900 | 0.01395285769440 | 0.22933747118800 |
| 0.74769652378900 | 0.01395319990800 | 0.56267172823900 |

|                  |                  |                  |
|------------------|------------------|------------------|
| 0.74769637637600 | 0.01395300363400 | 0.89600550349000 |
| 0.08292141892870 | 0.01173289332190 | 0.12120436767400 |
| 0.08292348082390 | 0.01173336441870 | 0.45453784907900 |
| 0.08292314721370 | 0.01173292569670 | 0.78787098622200 |
| 0.41625695045200 | 0.01173293122850 | 0.12120410021400 |
| 0.41625500255400 | 0.01173303101700 | 0.45453815955800 |
| 0.41625796728300 | 0.01173335187590 | 0.78787092256100 |
| 0.74959128817800 | 0.01173324692200 | 0.12120415038700 |
| 0.74959044120800 | 0.01173327065900 | 0.45453798526200 |
| 0.74958901243700 | 0.01173322057940 | 0.78787117346300 |
| 0.24981081080600 | 0.01370412249400 | 0.00890602154709 |
| 0.24980978031900 | 0.01370471178800 | 0.34224019758100 |
| 0.24981059423600 | 0.01370460349550 | 0.67557320653100 |
| 0.58314362999700 | 0.01370463386740 | 0.00890671106960 |
| 0.58314442201800 | 0.01370373008560 | 0.34223915811500 |
| 0.58314301697500 | 0.01370556816220 | 0.67557412249800 |
| 0.91647599882700 | 0.01370477728630 | 0.00890721126739 |
| 0.91647668312600 | 0.01370455248590 | 0.34224023879300 |
| 0.91647684106700 | 0.01370432507470 | 0.67557300379900 |
| 0.25071603430600 | 0.01456976219940 | 0.23044384501600 |
| 0.25071583621400 | 0.01456980407440 | 0.56377675130700 |
| 0.25071618861000 | 0.01456948827500 | 0.89710976545500 |
| 0.58404959410000 | 0.01456919089330 | 0.23044243069300 |
| 0.58404949283500 | 0.01457068155960 | 0.56377802447000 |
| 0.58404905840700 | 0.01456956107350 | 0.89710946950700 |
| 0.91738202265100 | 0.01456937841700 | 0.23044277807400 |
| 0.91738246643100 | 0.01456966565160 | 0.56377632463600 |
| 0.91738225540600 | 0.01456965025890 | 0.89711042468700 |
| 0.25322295468300 | 0.01450189290720 | 0.11878998064400 |
| 0.25322105682000 | 0.01450222173850 | 0.45212343209200 |

|                  |                  |                  |
|------------------|------------------|------------------|
| 0.25322191744700 | 0.01450214209240 | 0.78545649062700 |
| 0.58655536168000 | 0.01450224610480 | 0.11878955181700 |
| 0.58655628515400 | 0.01450226199960 | 0.45212383896600 |
| 0.58655399506800 | 0.01450244388250 | 0.78545651613000 |
| 0.91988674700000 | 0.01450219371000 | 0.11878957568500 |
| 0.91988809985500 | 0.01450241670430 | 0.45212332175000 |
| 0.91988868005300 | 0.01450196959360 | 0.78545662791000 |
| 0.12642556880500 | 0.06181475088490 | 0.05576877273020 |
| 0.12642676625600 | 0.06181433605620 | 0.38910360455600 |
| 0.12642675564900 | 0.06181415583550 | 0.72243639915700 |
| 0.45976048596900 | 0.06181461370530 | 0.05576975612630 |
| 0.45975902171100 | 0.06181437141940 | 0.38910227502700 |
| 0.45976097849100 | 0.06181453727950 | 0.72243731222500 |
| 0.79309404399900 | 0.06181420624970 | 0.05577085279060 |
| 0.79309376638100 | 0.06181436445120 | 0.38910353074900 |
| 0.79309264559700 | 0.06181463512780 | 0.72243615709000 |
| 0.12498863881000 | 0.06162479749020 | 0.27684518187200 |
| 0.12498877609600 | 0.06162488501430 | 0.61017768316600 |
| 0.12498862477500 | 0.06162484479920 | 0.94351084936600 |
| 0.45832201396600 | 0.06162441820030 | 0.27684399017600 |
| 0.45832236459600 | 0.06162524912030 | 0.61017891218700 |
| 0.45832251429700 | 0.06162490158440 | 0.94351090282400 |
| 0.79165558848600 | 0.06162474391140 | 0.27684426369300 |
| 0.79165519399400 | 0.06162493168910 | 0.61017772848800 |
| 0.79165533018300 | 0.06162497635840 | 0.94351182269600 |
| 0.12497992961200 | 0.06027263781040 | 0.16327433490800 |
| 0.12498046996400 | 0.06027166834620 | 0.49660609533600 |
| 0.12498059811300 | 0.06027173137280 | 0.82993965506000 |
| 0.45831423484300 | 0.06027174040950 | 0.16327275051700 |
| 0.45831348771200 | 0.06027264661460 | 0.49660808103900 |

|                  |                  |                  |
|------------------|------------------|------------------|
| 0.45831451477600 | 0.06027137421390 | 0.82993866063500 |
| 0.79164750629400 | 0.06027103013820 | 0.16327203076300 |
| 0.79164737659000 | 0.06027175301770 | 0.49660619607300 |
| 0.79164674055400 | 0.06027228240290 | 0.82994024972300 |
| 0.29166383971300 | 0.06130171594400 | 0.05461958654650 |
| 0.29166229011500 | 0.06130185785590 | 0.38795312389300 |
| 0.29166360250500 | 0.06130198251360 | 0.72128630294900 |
| 0.62499656493800 | 0.06130194324760 | 0.05461981411510 |
| 0.62499743256000 | 0.06130170913680 | 0.38795301081300 |
| 0.62499549409400 | 0.06130220239300 | 0.72128653638000 |
| 0.95832842731700 | 0.06130185609530 | 0.05461991875600 |
| 0.95832948442000 | 0.06130197268580 | 0.38795325150400 |
| 0.95832966654600 | 0.06130180682460 | 0.72128627124100 |
| 0.29155038987300 | 0.06133443890170 | 0.27691234610200 |
| 0.29155077344000 | 0.06133467043310 | 0.61024569940800 |
| 0.29155100962100 | 0.06133443023310 | 0.94357858502500 |
| 0.62488444748800 | 0.06133428974740 | 0.27691179727300 |
| 0.62488380169800 | 0.06133489383830 | 0.61024591077600 |
| 0.62488391818100 | 0.06133450686930 | 0.94357889448700 |
| 0.95821698857700 | 0.06133443017420 | 0.27691236661600 |
| 0.95821721824700 | 0.06133452400480 | 0.61024531193700 |
| 0.95821672953900 | 0.06133448024770 | 0.94357912895900 |
| 0.29185413354600 | 0.06118872338260 | 0.16548239553300 |
| 0.29185288648400 | 0.06118891618710 | 0.49881556417300 |
| 0.29185401044400 | 0.06118891240770 | 0.83214833670000 |
| 0.62518712766000 | 0.06118884588670 | 0.16548165196400 |
| 0.62518765644700 | 0.06118902815370 | 0.49881598764800 |
| 0.62518604862000 | 0.06118900757070 | 0.83214843778500 |
| 0.95851894049500 | 0.06118875252860 | 0.16548194750400 |
| 0.95851993338400 | 0.06118899906970 | 0.49881517106200 |

|                  |                  |                  |
|------------------|------------------|------------------|
| 0.95851999370600 | 0.06118881111040 | 0.83214883478400 |
| 0.04239421026410 | 0.06116261081140 | 0.05507409671320 |
| 0.04239540940610 | 0.06116282921930 | 0.38840780202700 |
| 0.04239529569120 | 0.06116262790550 | 0.72174078193500 |
| 0.37572931641200 | 0.06116264793790 | 0.05507424604980 |
| 0.37572762531000 | 0.06116255915650 | 0.38840740273200 |
| 0.37572966508600 | 0.06116298660500 | 0.72174108723700 |
| 0.70906268078500 | 0.06116285023520 | 0.05507452190050 |
| 0.70906270586000 | 0.06116266214350 | 0.38840775871700 |
| 0.70906134606100 | 0.06116290001210 | 0.72174088422500 |
| 0.04156363271620 | 0.06122261002740 | 0.27674517738600 |
| 0.04156386870180 | 0.06122273791760 | 0.61007787214100 |
| 0.04156347110510 | 0.06122264156930 | 0.94341138286900 |
| 0.37489692565200 | 0.06122247556970 | 0.27674457579700 |
| 0.37489738308800 | 0.06122293116070 | 0.61007869919500 |
| 0.37489776982000 | 0.06122264367160 | 0.94341118182900 |
| 0.70823101118200 | 0.06122257854890 | 0.27674446835900 |
| 0.70823026531400 | 0.06122292975730 | 0.61007816067100 |
| 0.70823058424600 | 0.06122272556250 | 0.94341175730000 |
| 0.04171072699310 | 0.06118141889110 | 0.16555622623800 |
| 0.04171195091680 | 0.06118170553790 | 0.49888902317800 |
| 0.04171171008250 | 0.06118151204950 | 0.83222248700900 |
| 0.37504555412600 | 0.06118143672450 | 0.16555580747200 |
| 0.37504428431800 | 0.06118161244290 | 0.49888985997700 |
| 0.37504621322200 | 0.06118168296110 | 0.83222201941400 |
| 0.70837935923700 | 0.06118161113240 | 0.16555539443700 |
| 0.70837894831400 | 0.06118174135560 | 0.49888938001400 |
| 0.70837795505500 | 0.06118166753560 | 0.83222261925300 |
| 0.20639052849100 | 0.06127417029770 | 0.05522889587020 |
| 0.20638889624600 | 0.06127388983030 | 0.38856359350800 |



|                  |                  |                  |
|------------------|------------------|------------------|
| 0.20638985201000 | 0.06127377986270 | 0.72189648624000 |
| 0.53972301906900 | 0.06127414613810 | 0.05522986282090 |
| 0.53972414445900 | 0.06127384651560 | 0.38856244694300 |
| 0.53972197367100 | 0.06127415925510 | 0.72189733527000 |
| 0.87305477768400 | 0.06127378524480 | 0.05523084778530 |
| 0.87305595902700 | 0.06127394878510 | 0.38856360681100 |
| 0.87305623794100 | 0.06127407656130 | 0.72189618880400 |
| 0.20782182626300 | 0.06145882009850 | 0.27711325784500 |
| 0.20782200279800 | 0.06145891634190 | 0.61044601209900 |
| 0.20782207538100 | 0.06145883214700 | 0.94377897475900 |
| 0.54115562608800 | 0.06145843925220 | 0.27711210884400 |
| 0.54115532226300 | 0.06145933821980 | 0.61044695950700 |
| 0.54115525561700 | 0.06145888993620 | 0.94377919803100 |
| 0.87448829502900 | 0.06145872059310 | 0.27711265252000 |
| 0.87448841423100 | 0.06145885965610 | 0.61044583493300 |
| 0.87448812075000 | 0.06145893478510 | 0.94377998314300 |
| 0.20821068781300 | 0.06322632901610 | 0.16575752593500 |
| 0.20820967753800 | 0.06322575732280 | 0.49908931150100 |
| 0.20821030965500 | 0.06322572467250 | 0.83242249863900 |
| 0.54154372778400 | 0.06322600837780 | 0.16575596640000 |
| 0.54154427201000 | 0.06322634939840 | 0.49909097356100 |
| 0.54154289272500 | 0.06322557164230 | 0.83242184516100 |
| 0.87487571404600 | 0.06322549950830 | 0.16575535693300 |
| 0.87487657773000 | 0.06322585804050 | 0.49908917763400 |
| 0.87487659431800 | 0.06322604491130 | 0.83242337665800 |
| 0.00000000000000 | 0.13043999660500 | 0.00000000000000 |
| 0.00000000000000 | 0.13043999660500 | 0.33333333333200 |
| 0.00000000000000 | 0.13043999660500 | 0.66666666666800 |
| 0.33333333333200 | 0.13043999660500 | 0.00000000000000 |
| 0.33333333333200 | 0.13043999660500 | 0.33333333333200 |

|                  |                  |                  |
|------------------|------------------|------------------|
| 0.3333333333200  | 0.13043999660500 | 0.6666666666800  |
| 0.6666666666800  | 0.13043999660500 | 0.00000000000000 |
| 0.6666666666800  | 0.13043999660500 | 0.3333333333200  |
| 0.6666666666800  | 0.13043999660500 | 0.6666666666800  |
| 0.00000000000000 | 0.13043999660500 | 0.22222334138000 |
| 0.00000000000000 | 0.13043999660500 | 0.55555667471300 |
| 0.00000000000000 | 0.13043999660500 | 0.88889000804700 |
| 0.3333333333200  | 0.13043999660500 | 0.22222334138000 |
| 0.3333333333200  | 0.13043999660500 | 0.55555667471300 |
| 0.3333333333200  | 0.13043999660500 | 0.88889000804700 |
| 0.6666666666800  | 0.13043999660500 | 0.22222334138000 |
| 0.6666666666800  | 0.13043999660500 | 0.55555667471300 |
| 0.6666666666800  | 0.13043999660500 | 0.88889000804700 |
| 0.00000000000000 | 0.13043999660500 | 0.11111000180100 |
| 0.00000000000000 | 0.13043999660500 | 0.44444333513300 |
| 0.00000000000000 | 0.13043999660500 | 0.77777666846700 |
| 0.3333333333200  | 0.13043999660500 | 0.11111000180100 |
| 0.3333333333200  | 0.13043999660500 | 0.44444333513300 |
| 0.3333333333200  | 0.13043999660500 | 0.77777666846700 |
| 0.6666666666800  | 0.13043999660500 | 0.11111000180100 |
| 0.6666666666800  | 0.13043999660500 | 0.44444333513300 |
| 0.6666666666800  | 0.13043999660500 | 0.77777666846700 |
| 0.16666666667500 | 0.13043999660500 | 0.00000000000000 |
| 0.16666666667500 | 0.13043999660500 | 0.3333333333200  |
| 0.16666666667500 | 0.13043999660500 | 0.6666666666800  |
| 0.5000000000700  | 0.13043999660500 | 0.00000000000000 |
| 0.5000000000700  | 0.13043999660500 | 0.3333333333200  |
| 0.5000000000700  | 0.13043999660500 | 0.6666666666800  |
| 0.83333333334100 | 0.13043999660500 | 0.00000000000000 |
| 0.83333333334100 | 0.13043999660500 | 0.3333333333200  |

|                  |                  |                  |
|------------------|------------------|------------------|
| 0.83333333334100 | 0.13043999660500 | 0.66666666666800 |
| 0.16666666667500 | 0.13043999660500 | 0.22222334138000 |
| 0.16666666667500 | 0.13043999660500 | 0.55555667471300 |
| 0.16666666667500 | 0.13043999660500 | 0.88889000804700 |
| 0.50000000000700 | 0.13043999660500 | 0.22222334138000 |
| 0.50000000000700 | 0.13043999660500 | 0.55555667471300 |
| 0.50000000000700 | 0.13043999660500 | 0.88889000804700 |
| 0.83333333334100 | 0.13043999660500 | 0.22222334138000 |
| 0.83333333334100 | 0.13043999660500 | 0.55555667471300 |
| 0.83333333334100 | 0.13043999660500 | 0.88889000804700 |
| 0.16666666667500 | 0.13043999660500 | 0.11111000180100 |
| 0.16666666667500 | 0.13043999660500 | 0.44444333513300 |
| 0.16666666667500 | 0.13043999660500 | 0.77777666846700 |
| 0.50000000000700 | 0.13043999660500 | 0.11111000180100 |
| 0.50000000000700 | 0.13043999660500 | 0.44444333513300 |
| 0.50000000000700 | 0.13043999660500 | 0.77777666846700 |
| 0.83333333334100 | 0.13043999660500 | 0.11111000180100 |
| 0.83333333334100 | 0.13043999660500 | 0.44444333513300 |
| 0.83333333334100 | 0.13043999660500 | 0.77777666846700 |
| 0.08333333332670 | 0.13043999660500 | 0.00000000000000 |
| 0.08333333332670 | 0.13043999660500 | 0.33333333332000 |
| 0.08333333332670 | 0.13043999660500 | 0.66666666666800 |
| 0.41666666666100 | 0.13043999660500 | 0.00000000000000 |
| 0.41666666666100 | 0.13043999660500 | 0.33333333332000 |
| 0.41666666666100 | 0.13043999660500 | 0.66666666666800 |
| 0.74999999993000 | 0.13043999660500 | 0.00000000000000 |
| 0.74999999993000 | 0.13043999660500 | 0.33333333332000 |
| 0.74999999993000 | 0.13043999660500 | 0.66666666666800 |
| 0.08333333332670 | 0.13043999660500 | 0.22222334138000 |
| 0.08333333332670 | 0.13043999660500 | 0.55555667471300 |

|                  |                  |                  |
|------------------|------------------|------------------|
| 0.08333333332670 | 0.13043999660500 | 0.88889000804700 |
| 0.41666666666100 | 0.13043999660500 | 0.22222334138000 |
| 0.41666666666100 | 0.13043999660500 | 0.55555667471300 |
| 0.41666666666100 | 0.13043999660500 | 0.88889000804700 |
| 0.74999999999300 | 0.13043999660500 | 0.22222334138000 |
| 0.74999999999300 | 0.13043999660500 | 0.55555667471300 |
| 0.74999999999300 | 0.13043999660500 | 0.88889000804700 |
| 0.08333333332670 | 0.13043999660500 | 0.11111000180100 |
| 0.08333333332670 | 0.13043999660500 | 0.44444333513300 |
| 0.08333333332670 | 0.13043999660500 | 0.77777666846700 |
| 0.41666666666100 | 0.13043999660500 | 0.11111000180100 |
| 0.41666666666100 | 0.13043999660500 | 0.44444333513300 |
| 0.41666666666100 | 0.13043999660500 | 0.77777666846700 |
| 0.74999999999300 | 0.13043999660500 | 0.11111000180100 |
| 0.74999999999300 | 0.13043999660500 | 0.44444333513300 |
| 0.74999999999300 | 0.13043999660500 | 0.77777666846700 |
| 0.25000000008900 | 0.13043999660500 | 0.00000000000000 |
| 0.25000000008900 | 0.13043999660500 | 0.33333333332000 |
| 0.25000000008900 | 0.13043999660500 | 0.66666666668000 |
| 0.58333333342100 | 0.13043999660500 | 0.00000000000000 |
| 0.58333333342100 | 0.13043999660500 | 0.33333333332000 |
| 0.58333333342100 | 0.13043999660500 | 0.66666666668000 |
| 0.91666666675500 | 0.13043999660500 | 0.00000000000000 |
| 0.91666666675500 | 0.13043999660500 | 0.33333333332000 |
| 0.91666666675500 | 0.13043999660500 | 0.66666666668000 |
| 0.25000000008900 | 0.13043999660500 | 0.22222334138000 |
| 0.25000000008900 | 0.13043999660500 | 0.55555667471300 |
| 0.25000000008900 | 0.13043999660500 | 0.88889000804700 |
| 0.58333333342100 | 0.13043999660500 | 0.22222334138000 |
| 0.58333333342100 | 0.13043999660500 | 0.55555667471300 |

|                  |                  |                  |
|------------------|------------------|------------------|
| 0.58333333342100 | 0.13043999660500 | 0.88889000804700 |
| 0.91666666675500 | 0.13043999660500 | 0.22222334138000 |
| 0.91666666675500 | 0.13043999660500 | 0.55555667471300 |
| 0.91666666675500 | 0.13043999660500 | 0.88889000804700 |
| 0.25000000008900 | 0.13043999660500 | 0.11111000180100 |
| 0.25000000008900 | 0.13043999660500 | 0.44444333513300 |
| 0.25000000008900 | 0.13043999660500 | 0.77777666846700 |
| 0.58333333342100 | 0.13043999660500 | 0.11111000180100 |
| 0.58333333342100 | 0.13043999660500 | 0.44444333513300 |
| 0.58333333342100 | 0.13043999660500 | 0.77777666846700 |
| 0.91666666675500 | 0.13043999660500 | 0.11111000180100 |
| 0.91666666675500 | 0.13043999660500 | 0.44444333513300 |
| 0.91666666675500 | 0.13043999660500 | 0.77777666846700 |
| 0.12641534905900 | 0.19909411818500 | 0.05575154954050 |
| 0.12641656066400 | 0.19909460491600 | 0.38908639433200 |
| 0.12641654428200 | 0.19909476679300 | 0.72241918361200 |
| 0.45975028029600 | 0.19909430590800 | 0.05575254410800 |
| 0.45974879671100 | 0.19909448670200 | 0.38908504682800 |
| 0.45975078569300 | 0.19909444351900 | 0.72242011326500 |
| 0.79308384511700 | 0.19909475928600 | 0.05575365136230 |
| 0.79308356596600 | 0.19909458769100 | 0.38908632294500 |
| 0.79308243597500 | 0.19909427651200 | 0.72241894036300 |
| 0.12497849432100 | 0.19920196836600 | 0.27688049029700 |
| 0.12497863023800 | 0.19920187870800 | 0.61021298475600 |
| 0.12497847877100 | 0.19920191856800 | 0.94354614943100 |
| 0.45831186804700 | 0.19920232344500 | 0.27687929240700 |
| 0.45831222238700 | 0.19920153755000 | 0.61021422159500 |
| 0.45831237058300 | 0.19920187677600 | 0.94354620094600 |
| 0.79164544547800 | 0.19920203468100 | 0.27687956759600 |
| 0.79164504964000 | 0.19920184040100 | 0.61021302769500 |

|                  |                  |                  |
|------------------|------------------|------------------|
| 0.79164518589400 | 0.19920180220000 | 0.94354712897400 |
| 0.12497737887900 | 0.20060389972400 | 0.16328130637400 |
| 0.12497792375900 | 0.20060493222600 | 0.49661305325000 |
| 0.12497805239400 | 0.20060483566500 | 0.82994662036900 |
| 0.45831168682700 | 0.20060485293100 | 0.16327970837000 |
| 0.45831094083800 | 0.20060386724300 | 0.49661505866200 |
| 0.45831197144100 | 0.20060526408600 | 0.82994560918300 |
| 0.79164496065000 | 0.20060560866700 | 0.16327897625300 |
| 0.79164483240800 | 0.20060485435800 | 0.49661314846200 |
| 0.79164419440200 | 0.20060428959100 | 0.82994721437500 |
| 0.29167020128400 | 0.19960092993400 | 0.05460857986360 |
| 0.29166863818500 | 0.19960079645000 | 0.38794212137300 |
| 0.29166996810000 | 0.19960067562200 | 0.72127530078900 |
| 0.62500291643000 | 0.19960072802400 | 0.05460880797280 |
| 0.62500380418400 | 0.19960093050400 | 0.38794200484100 |
| 0.62500184082500 | 0.19960047654000 | 0.72127553422600 |
| 0.95833477270300 | 0.19960081318100 | 0.05460891461990 |
| 0.95833583497900 | 0.19960069707400 | 0.38794224808900 |
| 0.95833601898400 | 0.19960085217400 | 0.72127526273700 |
| 0.29155872287500 | 0.19955669102200 | 0.27691659300500 |
| 0.29155911100900 | 0.19955646574400 | 0.61024994888400 |
| 0.29155934951200 | 0.19955670583500 | 0.94358283341400 |
| 0.62489278604700 | 0.19955684381000 | 0.27691604072000 |
| 0.62489213823000 | 0.19955624751900 | 0.61025016321200 |
| 0.62489225065100 | 0.19955663998400 | 0.94358314163500 |
| 0.95822531994500 | 0.19955671031300 | 0.27691661408000 |
| 0.95822555038100 | 0.19955661663200 | 0.61024955730400 |
| 0.95822506143600 | 0.19955665926400 | 0.94358337861900 |
| 0.29186521086500 | 0.19969127504700 | 0.16548307320300 |
| 0.29186395173500 | 0.19969108663400 | 0.49881625098200 |

|                  |                  |                  |
|------------------|------------------|------------------|
| 0.29186508861000 | 0.19969109917400 | 0.83214902261000 |
| 0.62519819721700 | 0.19969117412800 | 0.16548232448800 |
| 0.62519873751300 | 0.19969096747500 | 0.49881668121800 |
| 0.62519711145300 | 0.19969101934000 | 0.83214911789300 |
| 0.95852999921300 | 0.19969126497800 | 0.16548262618200 |
| 0.95853099786100 | 0.19969102143400 | 0.49881585274500 |
| 0.95853106192400 | 0.19969119657800 | 0.83214952045200 |
| 0.04239502720350 | 0.19973626885800 | 0.05506813974450 |
| 0.04239623044750 | 0.19973606794600 | 0.38840184935400 |
| 0.04239611236380 | 0.19973625912000 | 0.72173482893300 |
| 0.37573014644800 | 0.19973624377000 | 0.05506828789710 |
| 0.37572843540000 | 0.19973630866100 | 0.38840144633400 |
| 0.37573049955800 | 0.19973592340100 | 0.72173513489400 |
| 0.70906350952500 | 0.19973606054400 | 0.05506856784610 |
| 0.70906353715000 | 0.19973623266400 | 0.38840180429000 |
| 0.70906216479600 | 0.19973599846800 | 0.72173493011800 |
| 0.04156115967690 | 0.19965986767600 | 0.27675523272000 |
| 0.04156139580990 | 0.19965974715900 | 0.61008792099600 |
| 0.04156099685460 | 0.19965984066700 | 0.94342143670000 |
| 0.37489445208400 | 0.19965999392900 | 0.27675462256100 |
| 0.37489491091600 | 0.19965955369600 | 0.61008876042400 |
| 0.37489529710000 | 0.19965985119600 | 0.94342123272100 |
| 0.70822854044400 | 0.19965990806600 | 0.27675451939800 |
| 0.70822779391500 | 0.19965955961700 | 0.61008821270300 |
| 0.70822811212600 | 0.19965976933900 | 0.94342181113400 |
| 0.04171866349820 | 0.19969743651000 | 0.16556660211000 |
| 0.04171990115950 | 0.19969717298500 | 0.49889939575300 |
| 0.04171965831940 | 0.19969735544400 | 0.83223286002900 |
| 0.37505350290000 | 0.19969742491200 | 0.16556618363700 |
| 0.37505222153000 | 0.19969723986600 | 0.49890023394800 |

|                  |                  |                  |
|------------------|------------------|------------------|
| 0.37505417638500 | 0.19969720474900 | 0.83223239180900 |
| 0.70838731479200 | 0.19969727352600 | 0.16556576718900 |
| 0.70838690753600 | 0.19969713636300 | 0.49889975235200 |
| 0.70838589950600 | 0.19969720677000 | 0.83223299270300 |
| 0.20640436997800 | 0.19961470890500 | 0.05522149049500 |
| 0.20640271822800 | 0.19961503120400 | 0.38855620991100 |
| 0.20640368448500 | 0.19961513647500 | 0.72188909764700 |
| 0.53973684841700 | 0.19961477412000 | 0.05522246829440 |
| 0.53973799305800 | 0.19961502251000 | 0.38855503985500 |
| 0.53973578898000 | 0.19961480074200 | 0.72188996352200 |
| 0.87306859892900 | 0.19961517280200 | 0.05522346495080 |
| 0.87306978367100 | 0.19961498672500 | 0.38855622435000 |
| 0.87307006761600 | 0.19961483148100 | 0.72188879337300 |
| 0.20783763838400 | 0.19936701567100 | 0.27714773766700 |
| 0.20783781760800 | 0.19936692382600 | 0.61048048840300 |
| 0.20783789175700 | 0.19936699808200 | 0.94381345104000 |
| 0.54117144239500 | 0.19936739230000 | 0.27714658273700 |
| 0.54117113656800 | 0.19936650259900 | 0.61048144206000 |
| 0.54117106791300 | 0.19936696063600 | 0.94381367434500 |
| 0.87450410571800 | 0.19936712978000 | 0.27714712887900 |
| 0.87450422645700 | 0.19936698500100 | 0.61048031031700 |
| 0.87450393108100 | 0.19936691345600 | 0.94381446514400 |
| 0.20821948876600 | 0.19763628742300 | 0.16577335409100 |
| 0.20821847562300 | 0.19763692825600 | 0.49910512738600 |
| 0.20821910805600 | 0.19763695317200 | 0.83243831784400 |
| 0.54155252657000 | 0.19763664399100 | 0.16577178429900 |
| 0.54155307235000 | 0.19763628086500 | 0.49910679924200 |
| 0.54155168718800 | 0.19763714039900 | 0.83243765694900 |
| 0.87488450300700 | 0.19763719935700 | 0.16577115916200 |
| 0.87488537235500 | 0.19763683026700 | 0.49910499072100 |



|                  |                  |                  |
|------------------|------------------|------------------|
| 0.87488539384300 | 0.19763661531500 | 0.83243920118500 |
| 0.00012422043484 | 0.24723664184400 | 0.00870482407501 |
| 0.00012487609339 | 0.24723636503500 | 0.34203844797600 |
| 0.00012492396498 | 0.24723669952600 | 0.67537124070400 |
| 0.33345885843200 | 0.24723681270000 | 0.00870458991746 |
| 0.33345775861400 | 0.24723667826900 | 0.34203800213900 |
| 0.33345883137700 | 0.24723601740700 | 0.67537178933100 |
| 0.66679188103600 | 0.24723635707700 | 0.00870499981189 |
| 0.66679228180700 | 0.24723688657700 | 0.34203794905300 |
| 0.66679117279400 | 0.24723591281000 | 0.67537174893100 |
| 0.33287151794600 | 0.24703855334200 | 0.23054486979400 |
| 0.33287142667500 | 0.24703806350200 | 0.56387896199000 |
| 0.33287202389800 | 0.24703860252200 | 0.89721125461000 |
| 0.66620531222900 | 0.24703866336300 | 0.23054425272800 |
| 0.66620489265500 | 0.24703771692000 | 0.56387891142200 |
| 0.66620470273700 | 0.24703839671800 | 0.89721165061600 |
| 0.99953775111300 | 0.24703856571300 | 0.23054507600900 |
| 0.99953817179900 | 0.24703835896800 | 0.56387806928700 |
| 0.99953789103700 | 0.24703856577700 | 0.89721180020800 |
| 0.00049283142448 | 0.24739649337100 | 0.11930075610100 |
| 0.00049386112478 | 0.24739604720800 | 0.45263429830100 |
| 0.00049378411987 | 0.24739642774600 | 0.78596756346800 |
| 0.33382789660400 | 0.24739645261400 | 0.11930081204600 |
| 0.33382643475100 | 0.24739625496200 | 0.45263451781700 |
| 0.33382806389800 | 0.24739607935100 | 0.78596741496500 |
| 0.66716109645700 | 0.24739617013000 | 0.11930055628100 |
| 0.66716135079400 | 0.24739603399000 | 0.45263467555700 |
| 0.66715992774900 | 0.24739610215400 | 0.78596757793900 |
| 0.16655684869900 | 0.24759722068200 | 0.00951745988950 |
| 0.16655664304300 | 0.24759636406300 | 0.34285254056200 |

|                  |                  |                  |
|------------------|------------------|------------------|
| 0.16655697978100 | 0.24759701229800 | 0.67618501127400 |
| 0.49989042542400 | 0.24759682352500 | 0.00951861474794 |
| 0.49989032581300 | 0.24759785887000 | 0.34285052364400 |
| 0.49989024219100 | 0.24759549340000 | 0.67618673700300 |
| 0.83322317984900 | 0.24759643027400 | 0.00951989077280 |
| 0.83322353121800 | 0.24759687691200 | 0.34285224158300 |
| 0.83322325553300 | 0.24759687413700 | 0.67618487541300 |
| 0.16471937326600 | 0.25289764349500 | 0.22351464979200 |
| 0.16471929973000 | 0.25289751999600 | 0.55684673254800 |
| 0.16471946977500 | 0.25289792855200 | 0.89018009773500 |
| 0.49805290980600 | 0.25289784447900 | 0.22351292087700 |
| 0.49805299988600 | 0.25289727815900 | 0.55684858194600 |
| 0.49805282240200 | 0.25289759859900 | 0.89017943350800 |
| 0.83138584201900 | 0.25289741295700 | 0.22351270669800 |
| 0.83138593633000 | 0.25289756982000 | 0.55684664476100 |
| 0.83138580428900 | 0.25289761166800 | 0.89018089550400 |
| 0.16221641435900 | 0.28186551001800 | 0.10424595491200 |
| 0.16221641435900 | 0.28186551001800 | 0.43757928824600 |
| 0.16221641435900 | 0.28186551001800 | 0.77091262157800 |
| 0.49554974769100 | 0.28186551001800 | 0.10424595491200 |
| 0.49554974769100 | 0.28186551001800 | 0.43757928824600 |
| 0.49554974769100 | 0.28186551001800 | 0.77091262157800 |
| 0.82888308102500 | 0.28186551001800 | 0.10424595491200 |
| 0.82888308102500 | 0.28186551001800 | 0.43757928824600 |
| 0.82888308102500 | 0.28186551001800 | 0.77091262157800 |
| 0.08348630754370 | 0.24722999994400 | 0.00893222164721 |
| 0.08348704304840 | 0.24722936277800 | 0.34226658006800 |
| 0.08348698288440 | 0.24722987849000 | 0.67559913011100 |
| 0.41682088906300 | 0.24722972753500 | 0.00893273976785 |
| 0.41681962724300 | 0.24723037155600 | 0.34226526045700 |

|                  |                  |                  |
|------------------|------------------|------------------|
| 0.41682107487400 | 0.24722875440500 | 0.67560040398800 |
| 0.75015408689300 | 0.24722924466600 | 0.00893350256207 |
| 0.75015413911600 | 0.24722980076200 | 0.34226620761500 |
| 0.75015322515800 | 0.24722946632600 | 0.67559936786600 |
| 0.08104197311700 | 0.24692636762400 | 0.22938750947800 |
| 0.08104237979730 | 0.24692620912100 | 0.56271986532900 |
| 0.08104222172330 | 0.24692649795700 | 0.89605347035000 |
| 0.41437573439800 | 0.24692673356800 | 0.22938617287400 |
| 0.41437562758700 | 0.24692577236500 | 0.56272155530300 |
| 0.41437625435300 | 0.24692643879100 | 0.89605275233200 |
| 0.74770948492600 | 0.24692633320600 | 0.22938588771500 |
| 0.74770898438600 | 0.24692599113800 | 0.56272015017100 |
| 0.74770883553800 | 0.24692619217900 | 0.89605393285000 |
| 0.08293040857800 | 0.24914710202800 | 0.12120721437900 |
| 0.08293249802180 | 0.24914664590600 | 0.45454069356700 |
| 0.08293215755910 | 0.24914706850900 | 0.78787383297300 |
| 0.41626596966900 | 0.24914708693700 | 0.12120694274900 |
| 0.41626399260500 | 0.24914694647200 | 0.45454100884700 |
| 0.41626700138800 | 0.24914668238900 | 0.78787376104200 |
| 0.74960033319800 | 0.24914678717100 | 0.12120699865300 |
| 0.74959946683400 | 0.24914675100200 | 0.45454082615900 |
| 0.74959801639300 | 0.24914678786000 | 0.78787401446000 |
| 0.24981791505500 | 0.24723155099000 | 0.00891833341814 |
| 0.24981686789500 | 0.24723094582800 | 0.34225252187800 |
| 0.24981769711900 | 0.24723106122400 | 0.67558552253000 |
| 0.58315072021600 | 0.24723105735300 | 0.00891902991862 |
| 0.58315153764000 | 0.24723192451000 | 0.34225146410000 |
| 0.58315009626900 | 0.24723011029000 | 0.67558645452700 |
| 0.91648308447900 | 0.24723091593400 | 0.00891953687303 |
| 0.91648376988100 | 0.24723111805700 | 0.34225256433000 |

|                  |                  |                  |
|------------------|------------------|------------------|
| 0.91648393374300 | 0.24723134523300 | 0.67558532012400 |
| 0.25075447073700 | 0.24628389480400 | 0.23046236246300 |
| 0.25075427188200 | 0.24628385717400 | 0.56379526396100 |
| 0.25075463367800 | 0.24628416768900 | 0.89712827957500 |
| 0.58408802786200 | 0.24628448014400 | 0.23046093921800 |
| 0.58408794007100 | 0.24628295383700 | 0.56379654936600 |
| 0.58408749029300 | 0.24628412584300 | 0.89712797488800 |
| 0.91742044940500 | 0.24628428806800 | 0.23046128616300 |
| 0.91742089897900 | 0.24628400495500 | 0.56379483389700 |
| 0.91742068929200 | 0.24628402170300 | 0.89712893809800 |
| 0.25324352651600 | 0.24638522220300 | 0.11878090499700 |
| 0.25324160072600 | 0.24638489637800 | 0.45211435934000 |
| 0.25324247078800 | 0.24638497462200 | 0.78544742323800 |
| 0.58657591755300 | 0.24638488359800 | 0.11878047392100 |
| 0.58657685632700 | 0.24638484157000 | 0.45211477077500 |
| 0.58657452964900 | 0.24638469254400 | 0.78544744161100 |
| 0.91990727709700 | 0.24638494197400 | 0.11878049991300 |
| 0.91990864387100 | 0.24638471475900 | 0.45211424621700 |
| 0.91990923727400 | 0.24638514855600 | 0.78544755414500 |
| 0.12489515186000 | 0.98983076376200 | 0.03189368803970 |
| 0.12489547285400 | 0.98983124973200 | 0.36522789012900 |
| 0.12489550980800 | 0.98983118914900 | 0.69856053242800 |
| 0.45822909228200 | 0.98983098401800 | 0.03189448728200 |
| 0.45822847427300 | 0.98983083223000 | 0.36522660006600 |
| 0.45822931885700 | 0.98983158363000 | 0.69856176687600 |
| 0.79156235146300 | 0.98983145357500 | 0.03189485901960 |
| 0.79156241577900 | 0.98983109629300 | 0.36522788783300 |
| 0.79156180676700 | 0.98983112247900 | 0.69856078850600 |
| 0.12409579506100 | 0.99258333458000 | 0.25061623496400 |
| 0.12409587250900 | 0.99258345324600 | 0.58394902215000 |

|                  |                  |                  |
|------------------|------------------|------------------|
| 0.12409590933000 | 0.99258326918900 | 0.91728264824900 |
| 0.45742933375900 | 0.99258314672600 | 0.25061525467200 |
| 0.45742927307100 | 0.99258362080200 | 0.58395020957700 |
| 0.45742961475800 | 0.99258355089900 | 0.91728225729200 |
| 0.79076266966100 | 0.99258344380300 | 0.25061552012500 |
| 0.79076254292400 | 0.99258351801200 | 0.58394913869500 |
| 0.79076243723900 | 0.99258353884100 | 0.91728285682500 |
| 0.12539635161400 | 0.98798421458800 | 0.14138845458100 |
| 0.12539717959600 | 0.98798480333800 | 0.47472088428500 |
| 0.12539687759000 | 0.98798485127400 | 0.80805442093300 |
| 0.45873081320900 | 0.98798417169200 | 0.14138750812400 |
| 0.45872941394700 | 0.98798484791400 | 0.47472215610000 |
| 0.45873137668000 | 0.98798470824800 | 0.80805381059600 |
| 0.79206411673500 | 0.98798487276600 | 0.14138705037300 |
| 0.79206414094300 | 0.98798466103600 | 0.47472101854200 |
| 0.79206341384300 | 0.98798456937700 | 0.80805467117100 |
| 0.29168284554600 | 0.98979273710900 | 0.03116178554600 |
| 0.29168198349900 | 0.98979294759000 | 0.36449532580700 |
| 0.29168279367200 | 0.98979312993200 | 0.69782861968900 |
| 0.62501573210500 | 0.98979309223100 | 0.03116196049560 |
| 0.62501636467800 | 0.98979270983900 | 0.36449516385100 |
| 0.62501536404600 | 0.98979343077300 | 0.69782883261700 |
| 0.95834848808600 | 0.98979301150900 | 0.03116203511390 |
| 0.95834894401200 | 0.98979307187100 | 0.36449545750800 |
| 0.95834895848500 | 0.98979288637200 | 0.69782852028700 |
| 0.29140524408100 | 0.98928289994800 | 0.25345195211600 |
| 0.29140514558700 | 0.98928300363500 | 0.58678556449600 |
| 0.29140559510600 | 0.98928275460100 | 0.92011869600200 |
| 0.62473872230600 | 0.98928283599100 | 0.25345149449300 |
| 0.62473877968000 | 0.98928320461800 | 0.58678588832000 |

|                  |                  |                  |
|------------------|------------------|------------------|
| 0.62473835998000 | 0.98928306840400 | 0.92011860105500 |
| 0.95807164017100 | 0.98928285853600 | 0.25345196227700 |
| 0.95807177529100 | 0.98928299086900 | 0.58678520101900 |
| 0.95807154729400 | 0.98928287404900 | 0.92011889011100 |
| 0.29276376218800 | 0.98872703274900 | 0.14256087039800 |
| 0.29276250976800 | 0.98872734620400 | 0.47589442848200 |
| 0.29276369185500 | 0.98872742760900 | 0.80922755656300 |
| 0.62609647811600 | 0.98872739222700 | 0.14256043869000 |
| 0.62609745754100 | 0.98872716029400 | 0.47589489179500 |
| 0.62609575061600 | 0.98872774875200 | 0.80922733488300 |
| 0.95942916970000 | 0.98872725407000 | 0.14256071018600 |
| 0.95942959266400 | 0.98872753697500 | 0.47589417897300 |
| 0.95942958192600 | 0.98872718660600 | 0.80922767535800 |
| 0.04170661799380 | 0.98978062884400 | 0.03129954219540 |
| 0.04170703701640 | 0.98978097537300 | 0.36463318486100 |
| 0.04170695795970 | 0.98978078627400 | 0.69796617213200 |
| 0.37504083643000 | 0.98978075136100 | 0.03129963634140 |
| 0.37503986974800 | 0.98978057408000 | 0.36463278675800 |
| 0.37504094667400 | 0.98978121615700 | 0.69796660436000 |
| 0.70837395029700 | 0.98978110392100 | 0.03129978179010 |
| 0.70837420482400 | 0.98978078428300 | 0.36463310047600 |
| 0.70837337853100 | 0.98978105662100 | 0.69796636232400 |
| 0.04080344517460 | 0.98924398567700 | 0.25331334234500 |
| 0.04080362821710 | 0.98924416519700 | 0.58664635066500 |
| 0.04080342500930 | 0.98924391344800 | 0.91998001536200 |
| 0.37413702270000 | 0.98924394991300 | 0.25331279317100 |
| 0.37413684912800 | 0.98924416387600 | 0.58664713786100 |
| 0.37413751992700 | 0.98924409511500 | 0.91997970104500 |
| 0.70747058203100 | 0.98924408234200 | 0.25331278503600 |
| 0.70747034943700 | 0.98924432495700 | 0.58664668348500 |

|                  |                  |                  |
|------------------|------------------|------------------|
| 0.70747024128200 | 0.98924421802200 | 0.91997996118700 |
| 0.04080211528950 | 0.98880633497700 | 0.14291670026900 |
| 0.04080286529360 | 0.98880694625900 | 0.47624997545400 |
| 0.04080250158500 | 0.98880661597600 | 0.80958346521600 |
| 0.37413666159600 | 0.98880655506500 | 0.14291637788500 |
| 0.37413510471200 | 0.98880638580400 | 0.47625057354200 |
| 0.37413717465100 | 0.98880704960900 | 0.80958315852900 |
| 0.70746984448700 | 0.98880693340300 | 0.14291626026800 |
| 0.70747006405100 | 0.98880682964900 | 0.47625029391400 |
| 0.70746908197800 | 0.98880682021800 | 0.80958335677200 |
| 0.20840321288100 | 0.98935532698100 | 0.03154973191380 |
| 0.20840246048300 | 0.98935580850400 | 0.36488383950300 |
| 0.20840297841200 | 0.98935582333000 | 0.69821661678200 |
| 0.54173615847000 | 0.98935566010600 | 0.03155049658400 |
| 0.54173664533000 | 0.98935536638500 | 0.36488272073500 |
| 0.54173587761000 | 0.98935625966800 | 0.69821770681200 |
| 0.87506881839100 | 0.98935597802600 | 0.03155081942990 |
| 0.87506936581000 | 0.98935574747400 | 0.36488391132400 |
| 0.87506935425600 | 0.98935560772900 | 0.69821677357600 |
| 0.20668163986300 | 0.99206029708800 | 0.25018371886400 |
| 0.20668151120700 | 0.99206033136100 | 0.58351671197000 |
| 0.20668176553900 | 0.99206010501100 | 0.91685018532200 |
| 0.54001499580600 | 0.99206012327000 | 0.25018277718800 |
| 0.54001528748800 | 0.99206055689800 | 0.58351773125100 |
| 0.54001480060600 | 0.99206041515400 | 0.91684986755300 |
| 0.87334803632300 | 0.99206028742200 | 0.25018318315700 |
| 0.87334812088100 | 0.99206034817300 | 0.58351662678200 |
| 0.87334795098600 | 0.99206036434400 | 0.91685043218900 |
| 0.20669107931500 | 0.99821666710900 | 0.13544140834000 |
| 0.20669107931500 | 0.99821666710900 | 0.46877474167400 |

|                  |                  |                  |
|------------------|------------------|------------------|
| 0.20669107931500 | 0.99821666710900 | 0.80210807500600 |
| 0.54002441264900 | 0.99821666710900 | 0.13544140834000 |
| 0.54002441264900 | 0.99821666710900 | 0.46877474167400 |
| 0.54002441264900 | 0.99821666710900 | 0.80210807500600 |
| 0.87335774598300 | 0.99821666710900 | 0.13544140834000 |
| 0.87335774598300 | 0.99821666710900 | 0.46877474167400 |
| 0.87335774598300 | 0.99821666710900 | 0.80210807500600 |
| 0.00010640619034 | 0.06427340014990 | 0.08257122680910 |
| 0.00010697184897 | 0.06427348621130 | 0.41590463927400 |
| 0.00010687825318 | 0.06427335278530 | 0.74923783815800 |
| 0.33344089403200 | 0.06427348381440 | 0.08257115939630 |
| 0.33343970771200 | 0.06427329068750 | 0.41590467453300 |
| 0.33344104634100 | 0.06427349494070 | 0.74923784119900 |
| 0.66677388048800 | 0.06427356680550 | 0.08257119008610 |
| 0.66677441477700 | 0.06427328194290 | 0.41590479018900 |
| 0.66677321005900 | 0.06427357271890 | 0.74923783551800 |
| 0.33328069988800 | 0.06395217966150 | 0.30490377399800 |
| 0.33328110613200 | 0.06395230973570 | 0.63823744166700 |
| 0.33328131871200 | 0.06395221346350 | 0.97157038609700 |
| 0.66661461110900 | 0.06395208619070 | 0.30490370262300 |
| 0.66661409178400 | 0.06395240200470 | 0.63823734499700 |
| 0.66661428473400 | 0.06395224932820 | 0.97157061286000 |
| 0.99994749567800 | 0.06395214807040 | 0.30490405871900 |
| 0.99994753060700 | 0.06395226710790 | 0.63823703854900 |
| 0.99994722699500 | 0.06395220362850 | 0.97157057810700 |
| 0.33327556251100 | 0.06433627184060 | 0.19372576509700 |
| 0.33327472707700 | 0.06433615096870 | 0.52705959199200 |
| 0.33327592005500 | 0.06433623755350 | 0.86039223705200 |
| 0.66660874677700 | 0.06433629547070 | 0.19372545211000 |
| 0.66660906702900 | 0.06433628005890 | 0.52705956334600 |



|                  |                  |                  |
|------------------|------------------|------------------|
| 0.66660821331900 | 0.06433628460430 | 0.86039236558400 |
| 0.99994143867800 | 0.06433610722530 | 0.19372593610600 |
| 0.99994183063100 | 0.06433634546760 | 0.52705899820900 |
| 0.99994161067400 | 0.06433613156460 | 0.86039256897600 |
| 0.16675165221000 | 0.06039445065720 | 0.08521733789200 |
| 0.16675136343800 | 0.06039390043800 | 0.41855121215400 |
| 0.16675168228400 | 0.06039394861100 | 0.75188384418000 |
| 0.50008509052400 | 0.06039402751370 | 0.08521801989560 |
| 0.50008503691200 | 0.06039436730550 | 0.41855013949200 |
| 0.50008498778600 | 0.06039377182450 | 0.75188496666200 |
| 0.83341797869900 | 0.06039360868600 | 0.08521798148210 |
| 0.83341832575300 | 0.06039391782730 | 0.41855133282300 |
| 0.83341801006400 | 0.06039419367350 | 0.75188429473400 |
| 0.16640686498500 | 0.06307605678060 | 0.30512836173900 |
| 0.16640695985100 | 0.06307625919980 | 0.63846111364400 |
| 0.16640700464700 | 0.06307615544800 | 0.97179427978100 |
| 0.49974033175500 | 0.06307620580800 | 0.30512727102200 |
| 0.49974047429700 | 0.06307609790560 | 0.63846213644500 |
| 0.49974039110000 | 0.06307599756360 | 0.97179463674900 |
| 0.83307360296000 | 0.06307593634370 | 0.30512808281500 |
| 0.83307343824400 | 0.06307609082630 | 0.63846117384700 |
| 0.83307337021900 | 0.06307614837660 | 0.97179508383100 |
| 0.16598699444200 | 0.06700567015590 | 0.19223550602100 |
| 0.16598676166400 | 0.06700568734910 | 0.52556790779200 |
| 0.16598711386500 | 0.06700544645470 | 0.85890134886200 |
| 0.49932034682400 | 0.06700587855730 | 0.19223443415300 |
| 0.49932058632100 | 0.06700541370950 | 0.52556923623200 |
| 0.49932034189800 | 0.06700577119510 | 0.85890076461100 |
| 0.83265337558200 | 0.06700562535640 | 0.19223430624300 |
| 0.83265359327800 | 0.06700573448320 | 0.52556790241400 |

|                  |                  |                  |
|------------------|------------------|------------------|
| 0.83265335019700 | 0.06700567625470 | 0.85890170808700 |
| 0.08386839084040 | 0.06282039273420 | 0.08363521511670 |
| 0.08386917744410 | 0.06282030340660 | 0.41696887632000 |
| 0.08386897710480 | 0.06282016032290 | 0.75030194459000 |
| 0.41720286022000 | 0.06282047570750 | 0.08363532442130 |
| 0.41720150928800 | 0.06282015812610 | 0.41696863313100 |
| 0.41720335644900 | 0.06282034737520 | 0.75030223348800 |
| 0.75053623094900 | 0.06282041588790 | 0.08363550137320 |
| 0.75053624440300 | 0.06282023039950 | 0.41696895869900 |
| 0.75053529654100 | 0.06282038277950 | 0.75030202016000 |
| 0.08330032085980 | 0.06364319125370 | 0.30481181753200 |
| 0.08330033415920 | 0.06364334095020 | 0.63814463344100 |
| 0.08330019906700 | 0.06364322594650 | 0.97147799776800 |
| 0.41663353541600 | 0.06364325009970 | 0.30481108209500 |
| 0.41663394753000 | 0.06364325709330 | 0.63814543138300 |
| 0.41663412103600 | 0.06364316904570 | 0.97147809967700 |
| 0.74996730264900 | 0.06364310667810 | 0.30481149688300 |
| 0.74996683432500 | 0.06364329823580 | 0.63814480452500 |
| 0.74996711379400 | 0.06364328205470 | 0.97147847047200 |
| 0.08384257296250 | 0.06462621999650 | 0.19301461479000 |
| 0.08384300499020 | 0.06462640788080 | 0.52634729684500 |
| 0.08384278439220 | 0.06462614238820 | 0.85968081811100 |
| 0.41717665674100 | 0.06462644859100 | 0.19301382582100 |
| 0.41717570215100 | 0.06462609426220 | 0.52634837024900 |
| 0.41717711924700 | 0.06462636501400 | 0.85968030928200 |
| 0.75050996613200 | 0.06462633477790 | 0.19301370136100 |
| 0.75050990030600 | 0.06462638194880 | 0.52634749778000 |
| 0.75050939867000 | 0.06462634757440 | 0.85968096118200 |
| 0.24970296323700 | 0.06471271011040 | 0.08221454413860 |
| 0.24970171852300 | 0.06471260378380 | 0.41554816593200 |

|                  |                  |                  |
|------------------|------------------|------------------|
| 0.24970268985500 | 0.06471256634110 | 0.74888126737700 |
| 0.58303553946900 | 0.06471282746490 | 0.08221465113450 |
| 0.58303668365300 | 0.06471240944920 | 0.41554810254200 |
| 0.58303487447400 | 0.06471284273380 | 0.74888145706100 |
| 0.91636806695200 | 0.06471266747720 | 0.08221481085760 |
| 0.91636872071300 | 0.06471269898420 | 0.41554815856100 |
| 0.91636884906700 | 0.06471262935040 | 0.74888130582300 |
| 0.24977455552400 | 0.06351999814230 | 0.30474838452600 |
| 0.24977484535700 | 0.06352011320770 | 0.63808152671500 |
| 0.24977498418300 | 0.06352001360110 | 0.97141464216600 |
| 0.58310834395700 | 0.06351994280640 | 0.30474778403300 |
| 0.58310806331400 | 0.06352015019560 | 0.63808203099500 |
| 0.58310796645400 | 0.06351996017040 | 0.97141489638300 |
| 0.91644124067500 | 0.06351987803770 | 0.30474836314000 |
| 0.91644127596400 | 0.06352000020930 | 0.63808139853600 |
| 0.91644091959500 | 0.06352001037500 | 0.97141515132800 |
| 0.24997056479900 | 0.06416523455050 | 0.19346240461100 |
| 0.24996978127200 | 0.06416523454120 | 0.52679537250200 |
| 0.24997054907300 | 0.06416508733880 | 0.86012850679300 |
| 0.58330345521500 | 0.06416538974330 | 0.19346161418200 |
| 0.58330433400600 | 0.06416509735140 | 0.52679620773300 |
| 0.58330291231200 | 0.06416532528910 | 0.86012821259500 |
| 0.91663628038600 | 0.06416517630360 | 0.19346180227900 |
| 0.91663660689600 | 0.06416531742510 | 0.52679513248000 |
| 0.91663652148300 | 0.06416515840160 | 0.86012884871500 |
| 0.12500000000200 | 0.13043999660500 | 0.02777666599470 |
| 0.12500000000200 | 0.13043999660500 | 0.36110999932900 |
| 0.12500000000200 | 0.13043999660500 | 0.69444333266100 |
| 0.45833333333600 | 0.13043999660500 | 0.02777666599470 |
| 0.45833333333600 | 0.13043999660500 | 0.36110999932900 |

|                  |                  |                  |
|------------------|------------------|------------------|
| 0.45833333333600 | 0.13043999660500 | 0.69444333266100 |
| 0.79166666666800 | 0.13043999660500 | 0.02777666599470 |
| 0.79166666666800 | 0.13043999660500 | 0.36110999932900 |
| 0.79166666666800 | 0.13043999660500 | 0.69444333266100 |
| 0.12500000000200 | 0.13043999660500 | 0.2499999995100  |
| 0.12500000000200 | 0.13043999660500 | 0.5833333328300  |
| 0.12500000000200 | 0.13043999660500 | 0.9166666661500  |
| 0.45833333333600 | 0.13043999660500 | 0.2499999995100  |
| 0.45833333333600 | 0.13043999660500 | 0.5833333328300  |
| 0.45833333333600 | 0.13043999660500 | 0.9166666661500  |
| 0.79166666666800 | 0.13043999660500 | 0.2499999995100  |
| 0.79166666666800 | 0.13043999660500 | 0.5833333328300  |
| 0.79166666666800 | 0.13043999660500 | 0.9166666661500  |
| 0.12500000000200 | 0.13043999660500 | 0.13888999819000 |
| 0.12500000000200 | 0.13043999660500 | 0.47222333152400 |
| 0.12500000000200 | 0.13043999660500 | 0.80555666485600 |
| 0.45833333333600 | 0.13043999660500 | 0.13888999819000 |
| 0.45833333333600 | 0.13043999660500 | 0.47222333152400 |
| 0.45833333333600 | 0.13043999660500 | 0.80555666485600 |
| 0.79166666666800 | 0.13043999660500 | 0.13888999819000 |
| 0.79166666666800 | 0.13043999660500 | 0.47222333152400 |
| 0.79166666666800 | 0.13043999660500 | 0.80555666485600 |
| 0.29166666669900 | 0.13043999660500 | 0.02777666599470 |
| 0.29166666669900 | 0.13043999660500 | 0.36110999932900 |
| 0.29166666669900 | 0.13043999660500 | 0.69444333266100 |
| 0.62500000003300 | 0.13043999660500 | 0.02777666599470 |
| 0.62500000003300 | 0.13043999660500 | 0.36110999932900 |
| 0.62500000003300 | 0.13043999660500 | 0.69444333266100 |
| 0.95833333336500 | 0.13043999660500 | 0.02777666599470 |
| 0.95833333336500 | 0.13043999660500 | 0.36110999932900 |

|                  |                  |                  |
|------------------|------------------|------------------|
| 0.95833333336500 | 0.13043999660500 | 0.69444333266100 |
| 0.29166666669900 | 0.13043999660500 | 0.2499999995100  |
| 0.29166666669900 | 0.13043999660500 | 0.5833333328300  |
| 0.29166666669900 | 0.13043999660500 | 0.9166666661500  |
| 0.6250000003300  | 0.13043999660500 | 0.2499999995100  |
| 0.6250000003300  | 0.13043999660500 | 0.5833333328300  |
| 0.6250000003300  | 0.13043999660500 | 0.9166666661500  |
| 0.95833333336500 | 0.13043999660500 | 0.2499999995100  |
| 0.95833333336500 | 0.13043999660500 | 0.5833333328300  |
| 0.95833333336500 | 0.13043999660500 | 0.9166666661500  |
| 0.29166666669900 | 0.13043999660500 | 0.13888999819000 |
| 0.29166666669900 | 0.13043999660500 | 0.47222333152400 |
| 0.29166666669900 | 0.13043999660500 | 0.80555666485600 |
| 0.6250000003300  | 0.13043999660500 | 0.13888999819000 |
| 0.6250000003300  | 0.13043999660500 | 0.47222333152400 |
| 0.6250000003300  | 0.13043999660500 | 0.80555666485600 |
| 0.95833333336500 | 0.13043999660500 | 0.13888999819000 |
| 0.95833333336500 | 0.13043999660500 | 0.47222333152400 |
| 0.95833333336500 | 0.13043999660500 | 0.80555666485600 |
| 0.04166666667330 | 0.13043999660500 | 0.02777666599470 |
| 0.04166666667330 | 0.13043999660500 | 0.36110999932900 |
| 0.04166666667330 | 0.13043999660500 | 0.69444333266100 |
| 0.3750000000700  | 0.13043999660500 | 0.02777666599470 |
| 0.3750000000700  | 0.13043999660500 | 0.36110999932900 |
| 0.3750000000700  | 0.13043999660500 | 0.69444333266100 |
| 0.70833333334100 | 0.13043999660500 | 0.02777666599470 |
| 0.70833333334100 | 0.13043999660500 | 0.36110999932900 |
| 0.70833333334100 | 0.13043999660500 | 0.69444333266100 |
| 0.04166666667330 | 0.13043999660500 | 0.2499999995100  |
| 0.04166666667330 | 0.13043999660500 | 0.5833333328300  |

|                  |                  |                  |
|------------------|------------------|------------------|
| 0.04166666667330 | 0.13043999660500 | 0.91666666661500 |
| 0.37500000000700 | 0.13043999660500 | 0.24999999995100 |
| 0.37500000000700 | 0.13043999660500 | 0.58333333328300 |
| 0.37500000000700 | 0.13043999660500 | 0.91666666661500 |
| 0.70833333334100 | 0.13043999660500 | 0.24999999995100 |
| 0.70833333334100 | 0.13043999660500 | 0.58333333328300 |
| 0.70833333334100 | 0.13043999660500 | 0.91666666661500 |
| 0.04166666667330 | 0.13043999660500 | 0.13888999819000 |
| 0.04166666667330 | 0.13043999660500 | 0.47222333152400 |
| 0.04166666667330 | 0.13043999660500 | 0.80555666485600 |
| 0.37500000000700 | 0.13043999660500 | 0.13888999819000 |
| 0.37500000000700 | 0.13043999660500 | 0.47222333152400 |
| 0.37500000000700 | 0.13043999660500 | 0.80555666485600 |
| 0.70833333334100 | 0.13043999660500 | 0.13888999819000 |
| 0.70833333334100 | 0.13043999660500 | 0.47222333152400 |
| 0.70833333334100 | 0.13043999660500 | 0.80555666485600 |
| 0.20833333332800 | 0.13043999660500 | 0.02777666599470 |
| 0.20833333332800 | 0.13043999660500 | 0.36110999932900 |
| 0.20833333332800 | 0.13043999660500 | 0.69444333266100 |
| 0.54166666666100 | 0.13043999660500 | 0.02777666599470 |
| 0.54166666666100 | 0.13043999660500 | 0.36110999932900 |
| 0.54166666666100 | 0.13043999660500 | 0.69444333266100 |
| 0.87499999999500 | 0.13043999660500 | 0.02777666599470 |
| 0.87499999999500 | 0.13043999660500 | 0.36110999932900 |
| 0.87499999999500 | 0.13043999660500 | 0.69444333266100 |
| 0.20833333332800 | 0.13043999660500 | 0.24999999995100 |
| 0.20833333332800 | 0.13043999660500 | 0.58333333328300 |
| 0.20833333332800 | 0.13043999660500 | 0.91666666661500 |
| 0.54166666666100 | 0.13043999660500 | 0.24999999995100 |
| 0.54166666666100 | 0.13043999660500 | 0.58333333328300 |

|                  |                  |                  |
|------------------|------------------|------------------|
| 0.5416666666100  | 0.13043999660500 | 0.91666666661500 |
| 0.8749999999500  | 0.13043999660500 | 0.24999999995100 |
| 0.8749999999500  | 0.13043999660500 | 0.58333333328300 |
| 0.8749999999500  | 0.13043999660500 | 0.91666666661500 |
| 0.2083333332800  | 0.13043999660500 | 0.13888999819000 |
| 0.2083333332800  | 0.13043999660500 | 0.47222333152400 |
| 0.2083333332800  | 0.13043999660500 | 0.80555666485600 |
| 0.5416666666100  | 0.13043999660500 | 0.13888999819000 |
| 0.5416666666100  | 0.13043999660500 | 0.47222333152400 |
| 0.5416666666100  | 0.13043999660500 | 0.80555666485600 |
| 0.8749999999500  | 0.13043999660500 | 0.13888999819000 |
| 0.8749999999500  | 0.13043999660500 | 0.47222333152400 |
| 0.8749999999500  | 0.13043999660500 | 0.80555666485600 |
| 0.00010886627745 | 0.19662374280300 | 0.08256862031840 |
| 0.00010943253369 | 0.19662366318700 | 0.41590203462700 |
| 0.00010933682922 | 0.19662379088700 | 0.74923523302800 |
| 0.33344336160600 | 0.19662365707100 | 0.08256855275390 |
| 0.33344216584800 | 0.19662384691500 | 0.41590206933100 |
| 0.33344351778900 | 0.19662365722900 | 0.74923523889500 |
| 0.66677634332600 | 0.19662358282000 | 0.08256858377690 |
| 0.66677688593400 | 0.19662386168400 | 0.41590218648200 |
| 0.66677567031400 | 0.19662357943500 | 0.74923523201200 |
| 0.33328136964400 | 0.19696394589200 | 0.30492059015100 |
| 0.33328177840300 | 0.19696382235000 | 0.63825426389500 |
| 0.33328199306800 | 0.19696391941900 | 0.97158720698000 |
| 0.66661528398400 | 0.19696404418500 | 0.30492051953800 |
| 0.66661476415200 | 0.19696373296200 | 0.63825416670200 |
| 0.66661495580200 | 0.19696388750400 | 0.97158743349000 |
| 0.99994816560500 | 0.19696398512300 | 0.30492087761500 |
| 0.99994820079600 | 0.19696386318100 | 0.63825385592900 |

|                  |                  |                  |
|------------------|------------------|------------------|
| 0.99994789581400 | 0.19696392736400 | 0.97158739890100 |
| 0.33328202455200 | 0.19657269860200 | 0.19373729027200 |
| 0.33328118484400 | 0.19657281731400 | 0.52707112133600 |
| 0.33328239243000 | 0.19657273853500 | 0.86040376309400 |
| 0.66661520567500 | 0.19657268279100 | 0.19373697617400 |
| 0.66661553716300 | 0.19657269234100 | 0.52707109163800 |
| 0.66661467404400 | 0.19657269282100 | 0.86040389050500 |
| 0.99994789571200 | 0.19657286753800 | 0.19373746221900 |
| 0.99994829102900 | 0.19657262991100 | 0.52707052220700 |
| 0.99994807027000 | 0.19657283943400 | 0.86040409532900 |
| 0.16674921594500 | 0.20045874260400 | 0.08519432161090 |
| 0.16674892187500 | 0.20045934439200 | 0.41852820130700 |
| 0.16674924156300 | 0.20045928035000 | 0.75186082287200 |
| 0.50008265572000 | 0.20045920589800 | 0.08519501279890 |
| 0.50008259957300 | 0.20045881463500 | 0.41852710661200 |
| 0.50008254856800 | 0.20045950520200 | 0.75186197017500 |
| 0.83341554200600 | 0.20045965893400 | 0.08519497075600 |
| 0.83341588816200 | 0.20045933500600 | 0.41852832686700 |
| 0.83341557195400 | 0.20045903116400 | 0.75186128298900 |
| 0.16640976844800 | 0.19782043925000 | 0.30515166790700 |
| 0.16640986376000 | 0.19782023235900 | 0.63848441236600 |
| 0.16640990839100 | 0.19782033868100 | 0.97181758186400 |
| 0.49974323630000 | 0.19782027109900 | 0.30515056222000 |
| 0.49974337878300 | 0.19782041237400 | 0.63848545228100 |
| 0.49974329371400 | 0.19782050989600 | 0.97181794139500 |
| 0.83307650678000 | 0.19782056963400 | 0.30515139140700 |
| 0.83307634092100 | 0.19782041053700 | 0.63848447769300 |
| 0.83307627202300 | 0.19782035617900 | 0.97181838945500 |
| 0.16598713928600 | 0.19385084206300 | 0.19223894534800 |
| 0.16598690696200 | 0.19385084054100 | 0.52557134010200 |



|                  |                  |                  |
|------------------|------------------|------------------|
| 0.16598726228400 | 0.19385107423000 | 0.85890478731300 |
| 0.49932049106100 | 0.19385064574600 | 0.19223786371700 |
| 0.49932073539000 | 0.19385109583700 | 0.52557268379400 |
| 0.49932048725400 | 0.19385077028800 | 0.85890419247200 |
| 0.83265351800200 | 0.19385091582500 | 0.19223773549400 |
| 0.83265373752900 | 0.19385079855600 | 0.52557133318300 |
| 0.83265349445700 | 0.19385084663500 | 0.85890514496200 |
| 0.08386988677230 | 0.19807196857300 | 0.08363321046770 |
| 0.08387067979120 | 0.19807207447000 | 0.41696687197000 |
| 0.08387047433730 | 0.19807220540100 | 0.75029993581200 |
| 0.41720436555000 | 0.19807190244400 | 0.08363332227880 |
| 0.41720299858300 | 0.19807218718400 | 0.41696662208600 |
| 0.41720487000600 | 0.19807204725600 | 0.75030023311300 |
| 0.75053773777900 | 0.19807197536700 | 0.08363350029740 |
| 0.75053775308200 | 0.19807215180800 | 0.41696695627900 |
| 0.75053679710800 | 0.19807198963000 | 0.75030001410400 |
| 0.08329000221930 | 0.19726026732000 | 0.30483861216500 |
| 0.08329001485090 | 0.19726011385100 | 0.63817142319900 |
| 0.08328988006790 | 0.19726023140300 | 0.97150479106500 |
| 0.41662321455200 | 0.19726019500900 | 0.30483786784600 |
| 0.41662363157800 | 0.19726020923500 | 0.63817223172900 |
| 0.41662380540900 | 0.19726029815800 | 0.97150489268900 |
| 0.74995698639300 | 0.19726035780300 | 0.30483829163200 |
| 0.74995651692100 | 0.19726016417900 | 0.63817159708400 |
| 0.74995679668500 | 0.19726018424500 | 0.97150526485500 |
| 0.08384893096300 | 0.19629563588500 | 0.19303631371600 |
| 0.08384936662080 | 0.19629546239800 | 0.52636899220800 |
| 0.08384914202770 | 0.19629572486300 | 0.85970252015300 |
| 0.41718302022300 | 0.19629541211600 | 0.19303551636400 |
| 0.41718205462900 | 0.19629576043300 | 0.52637007761200 |

|                  |                  |                  |
|------------------|------------------|------------------|
| 0.41718348982100 | 0.19629551858000 | 0.85970200235100 |
| 0.75051632932100 | 0.19629554152500 | 0.19303539356300 |
| 0.75051626718400 | 0.19629549215500 | 0.52636919313300 |
| 0.75051575990600 | 0.19629552199900 | 0.85970265965900 |
| 0.24971406840600 | 0.19617247835600 | 0.08220945824080 |
| 0.24971281323300 | 0.19617260253100 | 0.41554308292400 |
| 0.24971379433700 | 0.19617263868800 | 0.74887618403300 |
| 0.58304663739700 | 0.19617237777700 | 0.08220956669010 |
| 0.58304779697800 | 0.19617277637000 | 0.41554301653700 |
| 0.58304596478200 | 0.19617238118200 | 0.74887637645100 |
| 0.91637916199500 | 0.19617254620000 | 0.08220972815080 |
| 0.91637981626300 | 0.19617251594800 | 0.41554307646500 |
| 0.91637994812700 | 0.19617257313200 | 0.74887622107300 |
| 0.24979164138400 | 0.19738952071800 | 0.30477065253700 |
| 0.24979193374600 | 0.19738940488000 | 0.63810379281000 |
| 0.24979207412700 | 0.19738950849700 | 0.97143691173700 |
| 0.58312543355500 | 0.19738956819200 | 0.30477004530600 |
| 0.58312515005400 | 0.19738938010200 | 0.63810430589600 |
| 0.58312505213600 | 0.19738957181500 | 0.97143716688100 |
| 0.91645832576800 | 0.19738965024300 | 0.30477063359500 |
| 0.91645836131300 | 0.19738952411900 | 0.63810366632000 |
| 0.91645800417400 | 0.19738951763300 | 0.97143742265400 |
| 0.24998523049700 | 0.19673185662300 | 0.19346792981800 |
| 0.24998444224900 | 0.19673186585800 | 0.52680089730600 |
| 0.24998521859100 | 0.19673201350100 | 0.86013403358100 |
| 0.58331811525600 | 0.19673170907300 | 0.19346713445600 |
| 0.58331900617100 | 0.19673199488200 | 0.52680174024600 |
| 0.58331756846800 | 0.19673178709600 | 0.86013373343300 |
| 0.91665093809000 | 0.19673193120800 | 0.19346732401000 |
| 0.91665126421700 | 0.19673178851600 | 0.52680065497600 |

|                  |                  |                  |
|------------------|------------------|------------------|
| 0.91665118137800 | 0.19673194097500 | 0.86013437524900 |
| 0.12489554572500 | 0.27111874775600 | 0.03190353133760 |
| 0.12489587335200 | 0.27111825569600 | 0.36523774261300 |
| 0.12489590953200 | 0.27111830157200 | 0.69857037555000 |
| 0.45822949228200 | 0.27111854115800 | 0.03190434170260 |
| 0.45822886864400 | 0.27111864490800 | 0.36523643168800 |
| 0.45822972546100 | 0.27111794441400 | 0.69857163287900 |
| 0.79156275581300 | 0.27111806010600 | 0.03190471936660 |
| 0.79156281966500 | 0.27111842158500 | 0.36523774408400 |
| 0.79156220363300 | 0.27111839318800 | 0.69857063705400 |
| 0.12410297441800 | 0.26823987952500 | 0.25068778973000 |
| 0.12410305347400 | 0.26823975991600 | 0.58402057146900 |
| 0.12410309044900 | 0.26823994582100 | 0.91735419969200 |
| 0.45743651465700 | 0.26824006598000 | 0.25068680073800 |
| 0.45743645335100 | 0.26823959278900 | 0.58402177108200 |
| 0.45743679943400 | 0.26823967519700 | 0.91735380041300 |
| 0.79076984945300 | 0.26823977392500 | 0.25068706879300 |
| 0.79076972431200 | 0.26823970205200 | 0.58402068570800 |
| 0.79076961809100 | 0.26823968226600 | 0.91735440942300 |
| 0.12540476703600 | 0.27289337065700 | 0.14140148577300 |
| 0.12540560543100 | 0.27289276552900 | 0.47473389891900 |
| 0.12540529233300 | 0.27289269105600 | 0.80806744393700 |
| 0.45873924561400 | 0.27289343113100 | 0.14140052320700 |
| 0.45873781401300 | 0.27289269453000 | 0.47473519549000 |
| 0.45873982132600 | 0.27289288224600 | 0.80806681337600 |
| 0.79207255051900 | 0.27289271603800 | 0.14140005706500 |
| 0.79207257611400 | 0.27289292504100 | 0.47473402951600 |
| 0.79207183621400 | 0.27289300605100 | 0.80806769250900 |
| 0.29168682561700 | 0.27115238444600 | 0.03117535830160 |
| 0.29168595365100 | 0.27115215720800 | 0.36450889901600 |

|                  |                  |                  |
|------------------|------------------|------------------|
| 0.29168677178400 | 0.27115197953800 | 0.69784219374000 |
| 0.62501970782400 | 0.27115203428700 | 0.03117553362880 |
| 0.62502034715900 | 0.27115239301400 | 0.36450873400700 |
| 0.62501933434000 | 0.27115169460500 | 0.69784240740900 |
| 0.95835245955100 | 0.27115210870200 | 0.03117561020870 |
| 0.95835291682300 | 0.27115204499800 | 0.36450903043400 |
| 0.95835293358300 | 0.27115222865200 | 0.69784209107300 |
| 0.29142343524500 | 0.27163148514600 | 0.25346677879300 |
| 0.29142333674200 | 0.27163138169200 | 0.58680039292100 |
| 0.29142379390000 | 0.27163163860700 | 0.92013352225400 |
| 0.62475691322800 | 0.27163154853900 | 0.25346631753900 |
| 0.62475697689200 | 0.27163119064600 | 0.58680071886500 |
| 0.62475654971100 | 0.27163132913800 | 0.92013342502600 |
| 0.95808982822600 | 0.27163153027900 | 0.25346678800900 |
| 0.95808996516000 | 0.27163139953600 | 0.58680002502800 |
| 0.95808973653600 | 0.27163151626100 | 0.92013371718400 |
| 0.29277689470300 | 0.27215409256700 | 0.14256106200700 |
| 0.29277562931900 | 0.27215376527700 | 0.47589462288200 |
| 0.29277682602800 | 0.27215368783000 | 0.80922775283000 |
| 0.62610960350300 | 0.27215373682600 | 0.14256062626600 |
| 0.62611059950300 | 0.27215395400500 | 0.47589509093300 |
| 0.62610886562000 | 0.27215337915700 | 0.80922752418900 |
| 0.95944229101300 | 0.27215387030500 | 0.14256090030600 |
| 0.95944271444000 | 0.27215358565100 | 0.47589436916900 |
| 0.95944270576100 | 0.27215393096100 | 0.80922786845500 |
| 0.04170655728110 | 0.27116090945500 | 0.03131475364930 |
| 0.04170698003920 | 0.27116055737400 | 0.36464839754100 |
| 0.04170690006840 | 0.27116074154700 | 0.69798138401900 |
| 0.37504078386100 | 0.27116079393400 | 0.03131484680970 |
| 0.37503980606300 | 0.27116094516400 | 0.36464799572300 |

|                  |                  |                  |
|------------------|------------------|------------------|
| 0.37504089690200 | 0.27116032472500 | 0.69798181897500 |
| 0.70837389757100 | 0.27116043840100 | 0.03131499539820 |
| 0.70837415404900 | 0.27116074886500 | 0.36464831166800 |
| 0.70837332134800 | 0.27116048586200 | 0.69798157370800 |
| 0.04081055550890 | 0.27166085514100 | 0.25333895501700 |
| 0.04081073937830 | 0.27166067633800 | 0.58667195988600 |
| 0.04081053290110 | 0.27166093137800 | 0.92000562804200 |
| 0.37414413649000 | 0.27166088752000 | 0.25333840093300 |
| 0.37414395684800 | 0.27166068007800 | 0.58667275583700 |
| 0.37414463732600 | 0.27166075805600 | 0.92000530823800 |
| 0.70747769650200 | 0.27166075993300 | 0.25333839379700 |
| 0.70747746450000 | 0.27166052557500 | 0.58667229366200 |
| 0.70747735285200 | 0.27166063376300 | 0.92000557148000 |
| 0.04081352138910 | 0.27206886184500 | 0.14292031896700 |
| 0.04081427920480 | 0.27206825044500 | 0.47625359207900 |
| 0.04081390866910 | 0.27206857439000 | 0.80958708518200 |
| 0.37414808063100 | 0.27206864498000 | 0.14291999271800 |
| 0.37414650134300 | 0.27206879924500 | 0.47625419672000 |
| 0.37414860465800 | 0.27206815329000 | 0.80958677211900 |
| 0.70748126268300 | 0.27206826574200 | 0.14291987575200 |
| 0.70748148919500 | 0.27206836904100 | 0.47625391025400 |
| 0.70748049320200 | 0.27206838346300 | 0.80958697261000 |
| 0.20840658386400 | 0.27156101256700 | 0.03156427809340 |
| 0.20840582214800 | 0.27156051677200 | 0.36489839790500 |
| 0.20840634640400 | 0.27156049266900 | 0.69823116779000 |
| 0.54173952144300 | 0.27156069217500 | 0.03156505149630 |
| 0.54174001972400 | 0.27156093365200 | 0.36489725989300 |
| 0.54173923560300 | 0.27156009635900 | 0.69823227480100 |
| 0.87507217569100 | 0.27156036164500 | 0.03156538112260 |
| 0.87507272809500 | 0.27156059268900 | 0.36489847211300 |

|                  |                  |                  |
|------------------|------------------|------------------|
| 0.87507271927400 | 0.27156073015200 | 0.69823132588600 |
| 0.20670859240900 | 0.26870833285300 | 0.25019353428600 |
| 0.20670846463600 | 0.26870829594400 | 0.58352652245100 |
| 0.20670872432500 | 0.26870852044000 | 0.91685999667100 |
| 0.54004194866600 | 0.26870850707400 | 0.25019258477900 |
| 0.54004224621800 | 0.26870806997300 | 0.58352755230400 |
| 0.54004175228600 | 0.26870822022800 | 0.91685967353500 |
| 0.87337498622800 | 0.26870834672300 | 0.25019299374300 |
| 0.87337507158500 | 0.26870828382300 | 0.58352643479200 |
| 0.87337490175400 | 0.26870826595800 | 0.91686024528700 |
| 0.20670993032900 | 0.26259430208100 | 0.13543654167400 |
| 0.20670993032900 | 0.26259430208100 | 0.46876987500600 |
| 0.20670993032900 | 0.26259430208100 | 0.80210320834000 |
| 0.54004326366200 | 0.26259430208100 | 0.13543654167400 |
| 0.54004326366200 | 0.26259430208100 | 0.46876987500600 |
| 0.54004326366200 | 0.26259430208100 | 0.80210320834000 |
| 0.87337659699600 | 0.26259430208100 | 0.13543654167400 |
| 0.87337659699600 | 0.26259430208100 | 0.46876987500600 |
| 0.87337659699600 | 0.26259430208100 | 0.80210320834000 |
| 0.19087017234200 | 0.38018768325100 | 0.22725612971600 |
| 0.19087017234200 | 0.38018768325100 | 0.56058946305000 |
| 0.19087017234200 | 0.38018768325100 | 0.89392279638400 |
| 0.52420350567400 | 0.38018768325100 | 0.22725612971600 |
| 0.52420350567400 | 0.38018768325100 | 0.56058946305000 |
| 0.52420350567400 | 0.38018768325100 | 0.89392279638400 |
| 0.85753683900800 | 0.38018768325100 | 0.22725612971600 |
| 0.85753683900800 | 0.38018768325100 | 0.56058946305000 |
| 0.85753683900800 | 0.38018768325100 | 0.89392279638400 |
| 0.21479649540400 | 0.29900101860400 | 0.15510348397200 |
| 0.21479627827800 | 0.29900072842300 | 0.48843658057000 |

|                  |                  |                  |
|------------------|------------------|------------------|
| 0.21479636055900 | 0.29900080268500 | 0.82176988922900 |
| 0.54812974095900 | 0.29900082275400 | 0.15510332252600 |
| 0.54812979499200 | 0.29900091478600 | 0.48843674419100 |
| 0.54812959791500 | 0.29900065991800 | 0.82176985039600 |
| 0.88146288087700 | 0.29900062487300 | 0.15510317041400 |
| 0.88146298441500 | 0.29900074860900 | 0.48843659295100 |
| 0.88146302361300 | 0.29900087869300 | 0.82177002504300 |
| 0.22376417526500 | 0.34138876111000 | 0.23800479754800 |
| 0.22376417836200 | 0.34138875294900 | 0.57133811323900 |
| 0.22376424487800 | 0.34138887794100 | 0.90467146309500 |
| 0.55709749346000 | 0.34138884931600 | 0.23800461597300 |
| 0.55709761924000 | 0.34138869961000 | 0.57133831763200 |
| 0.55709748798600 | 0.34138861888300 | 0.90467143963200 |
| 0.89043078109900 | 0.34138881948400 | 0.23800471033100 |
| 0.89043080698800 | 0.34138882175100 | 0.57133806484400 |
| 0.89043080374900 | 0.34138862252000 | 0.90467153445900 |
| 0.16463856006300 | 0.36495582081400 | 0.24868179206500 |
| 0.16463856006300 | 0.36495582081400 | 0.58201512539900 |
| 0.16463856006300 | 0.36495582081400 | 0.91534845873100 |
| 0.49797189339700 | 0.36495582081400 | 0.24868179206500 |
| 0.49797189339700 | 0.36495582081400 | 0.58201512539900 |
| 0.49797189339700 | 0.36495582081400 | 0.91534845873100 |
| 0.83130522673100 | 0.36495582081400 | 0.24868179206500 |
| 0.83130522673100 | 0.36495582081400 | 0.58201512539900 |
| 0.83130522673100 | 0.36495582081400 | 0.91534845873100 |
| 0.16384550961300 | 0.35793150317700 | 0.21451352218200 |
| 0.16384550961300 | 0.35793150317700 | 0.54784685551400 |
| 0.16384550961300 | 0.35793150317700 | 0.88118018884800 |
| 0.49717884294500 | 0.35793150317700 | 0.21451352218200 |
| 0.49717884294500 | 0.35793150317700 | 0.54784685551400 |

|                  |                  |                  |
|------------------|------------------|------------------|
| 0.49717884294500 | 0.35793150317700 | 0.88118018884800 |
| 0.83051217627900 | 0.35793150317700 | 0.21451352218200 |
| 0.83051217627900 | 0.35793150317700 | 0.54784685551400 |
| 0.83051217627900 | 0.35793150317700 | 0.88118018884800 |
| 0.17778683720500 | 0.32686669359700 | 0.27186060640600 |
| 0.17778687988100 | 0.32686668954900 | 0.60519388450700 |
| 0.17778685404600 | 0.32686681598600 | 0.93852722658400 |
| 0.51112022264000 | 0.32686678050500 | 0.27186043298800 |
| 0.51112024357500 | 0.32686658038100 | 0.60519405737200 |
| 0.51112028528500 | 0.32686658660600 | 0.93852718618600 |
| 0.84445350824300 | 0.32686667487800 | 0.27186053376400 |
| 0.84445347064500 | 0.32686673258600 | 0.60519387997500 |
| 0.84445351751800 | 0.32686662872900 | 0.93852727762800 |
| 0.14557716990300 | 0.32640325477700 | 0.26864104828800 |
| 0.14557719818700 | 0.32640329212300 | 0.60197432675300 |
| 0.14557722067400 | 0.32640336950400 | 0.93530771117300 |
| 0.47891057086700 | 0.32640340365000 | 0.26864086610900 |
| 0.47891060156000 | 0.32640322512900 | 0.60197455285300 |
| 0.47891059757900 | 0.32640326273500 | 0.93530763903900 |
| 0.81224387271800 | 0.32640325472500 | 0.26864096565300 |
| 0.81224385937800 | 0.32640328672900 | 0.60197432859700 |
| 0.81224381774900 | 0.32640321259600 | 0.93530771121300 |
| 0.23494133527100 | 0.39037665836700 | 0.23765444461600 |
| 0.23494120172600 | 0.39037641203400 | 0.57098769093500 |
| 0.23494128203500 | 0.39037641976400 | 0.90432107150800 |
| 0.56827459793700 | 0.39037658149600 | 0.23765428389000 |
| 0.56827472269700 | 0.39037648895100 | 0.57098791317300 |
| 0.56827452485100 | 0.39037635052900 | 0.90432098471100 |
| 0.90160778520300 | 0.39037634412100 | 0.23765427973600 |
| 0.90160785748300 | 0.39037640637400 | 0.57098766373300 |



|                  |                  |                  |
|------------------|------------------|------------------|
| 0.90160792023400 | 0.39037651104500 | 0.90432109668100 |
| 0.14633578490600 | 0.29848034723700 | 0.18212347567900 |
| 0.14633557970700 | 0.29848010296600 | 0.51545651556400 |
| 0.14633563418600 | 0.29848016062100 | 0.84879017880700 |
| 0.47966907885600 | 0.29848018607500 | 0.18212291821800 |
| 0.47966919126400 | 0.29848034259900 | 0.51545732723900 |
| 0.47966896262400 | 0.29847994616200 | 0.84878967929100 |
| 0.81300226652500 | 0.29848009713400 | 0.18212293680400 |
| 0.81300226457000 | 0.29848007064200 | 0.51545648526200 |
| 0.81300237484500 | 0.29848017814700 | 0.84879011418500 |
| 0.17844776291200 | 0.30201343740400 | 0.18370663357200 |
| 0.17844802763600 | 0.30201325301700 | 0.51703963580700 |
| 0.17844814189800 | 0.30201326696500 | 0.85037315326100 |
| 0.51178142714600 | 0.30201332428800 | 0.18370599741600 |
| 0.51178127134200 | 0.30201337596500 | 0.51704025596200 |
| 0.51178147341300 | 0.30201311855100 | 0.85037277643800 |
| 0.84511473154700 | 0.30201324433300 | 0.18370606518000 |
| 0.84511471765600 | 0.30201321056300 | 0.51703961487700 |
| 0.84511448219500 | 0.30201327965800 | 0.85037325639700 |
| 0.19117110371900 | 0.88035195697000 | 0.22658762425800 |
| 0.19117110371900 | 0.88035195697000 | 0.55992095759000 |
| 0.19117110371900 | 0.88035195697000 | 0.89325429092400 |
| 0.52450443705100 | 0.88035195697000 | 0.22658762425800 |
| 0.52450443705100 | 0.88035195697000 | 0.55992095759000 |
| 0.52450443705100 | 0.88035195697000 | 0.89325429092400 |
| 0.85783777038500 | 0.88035195697000 | 0.22658762425800 |
| 0.85783777038500 | 0.88035195697000 | 0.55992095759000 |
| 0.85783777038500 | 0.88035195697000 | 0.89325429092400 |
| 0.21483312300400 | 0.96185840986300 | 0.15512346095300 |
| 0.21483290806300 | 0.96185869534100 | 0.48845656193000 |

|                  |                  |                  |
|------------------|------------------|------------------|
| 0.21483298871000 | 0.96185862027700 | 0.82178986996100 |
| 0.54816637088700 | 0.96185860398900 | 0.15512330248500 |
| 0.54816642088700 | 0.96185850987500 | 0.48845672130200 |
| 0.54816622990200 | 0.96185876469500 | 0.82178983350100 |
| 0.88149951289000 | 0.96185879670400 | 0.15512315311700 |
| 0.88149961491900 | 0.96185867620100 | 0.48845657449100 |
| 0.88149965246800 | 0.96185854790100 | 0.82179000468400 |
| 0.22383356707000 | 0.91947285342200 | 0.23801527743900 |
| 0.22383357002000 | 0.91947285996700 | 0.57134859230000 |
| 0.22383363553300 | 0.91947273319400 | 0.90468193880600 |
| 0.55716688565200 | 0.91947276458200 | 0.23801509703200 |
| 0.55716700899400 | 0.91947291162900 | 0.57134879333500 |
| 0.55716687906000 | 0.91947298938100 | 0.90468191651200 |
| 0.89050017311800 | 0.91947279572500 | 0.23801519027800 |
| 0.89050019860900 | 0.91947278985200 | 0.57134854286800 |
| 0.89050019358800 | 0.91947298855800 | 0.90468201094200 |
| 0.16465016269500 | 0.89541870945100 | 0.24769473262100 |
| 0.16465016269500 | 0.89541870945100 | 0.58102806595300 |
| 0.16465016269500 | 0.89541870945100 | 0.91436139928700 |
| 0.49798349602900 | 0.89541870945100 | 0.24769473262100 |
| 0.49798349602900 | 0.89541870945100 | 0.58102806595300 |
| 0.49798349602900 | 0.89541870945100 | 0.91436139928700 |
| 0.83131682936300 | 0.89541870945100 | 0.24769473262100 |
| 0.83131682936300 | 0.89541870945100 | 0.58102806595300 |
| 0.83131682936300 | 0.89541870945100 | 0.91436139928700 |
| 0.16428441036100 | 0.90249161381900 | 0.21354183916600 |
| 0.16428441036100 | 0.90249161381900 | 0.54687517250000 |
| 0.16428441036100 | 0.90249161381900 | 0.88020850583200 |
| 0.49761774369300 | 0.90249161381900 | 0.21354183916600 |
| 0.49761774369300 | 0.90249161381900 | 0.54687517250000 |

|                  |                  |                  |
|------------------|------------------|------------------|
| 0.49761774369300 | 0.90249161381900 | 0.88020850583200 |
| 0.83095107702700 | 0.90249161381900 | 0.21354183916600 |
| 0.83095107702700 | 0.90249161381900 | 0.54687517250000 |
| 0.83095107702700 | 0.90249161381900 | 0.88020850583200 |
| 0.17753243098000 | 0.93302810901700 | 0.27123242621000 |
| 0.17753246605900 | 0.93302810610600 | 0.60456571582800 |
| 0.17753243023000 | 0.93302797453300 | 0.93789906693600 |
| 0.51086581250200 | 0.93302801609800 | 0.27123224764600 |
| 0.51086582669700 | 0.93302821724900 | 0.60456589485000 |
| 0.51086586399200 | 0.93302820372400 | 0.93789902418400 |
| 0.84419909814000 | 0.93302812475600 | 0.27123235416200 |
| 0.84419905908400 | 0.93302806800600 | 0.60456571251400 |
| 0.84419910468100 | 0.93302816886900 | 0.93789911098200 |
| 0.14536321957800 | 0.93369099965800 | 0.26775732175300 |
| 0.14536325048100 | 0.93369095788700 | 0.60109061379500 |
| 0.14536327745600 | 0.93369087720800 | 0.93442401006800 |
| 0.47869661291800 | 0.93369086038300 | 0.26775713165000 |
| 0.47869665874600 | 0.93369101875900 | 0.60109084661300 |
| 0.47869664983900 | 0.93369098985500 | 0.93442393190700 |
| 0.81202992486900 | 0.93369099895600 | 0.26775724023800 |
| 0.81202991641600 | 0.93369096114000 | 0.60109061925700 |
| 0.81202987309600 | 0.93369103691300 | 0.93442400074100 |
| 0.23519266206200 | 0.87059591625300 | 0.23771827661300 |
| 0.23519253029500 | 0.87059615812000 | 0.57105152313000 |
| 0.23519260928500 | 0.87059614867700 | 0.90438490278200 |
| 0.56852592528300 | 0.87059599121400 | 0.23771811641100 |
| 0.56852604871600 | 0.87059608246600 | 0.57105174429100 |
| 0.56852585348200 | 0.87059621603400 | 0.90438481734600 |
| 0.90185911395300 | 0.87059622439100 | 0.23771811151900 |
| 0.90185918463200 | 0.87059616334900 | 0.57105149522300 |

|                  |                  |                  |
|------------------|------------------|------------------|
| 0.90185924704400 | 0.87059605904300 | 0.90438492753000 |
| 0.14640640223200 | 0.96224923596300 | 0.18199192146300 |
| 0.14640620254100 | 0.96224947484800 | 0.51532496396900 |
| 0.14640625887100 | 0.96224941172100 | 0.84865861886900 |
| 0.47973969758900 | 0.96224939981200 | 0.18199137452100 |
| 0.47973981168200 | 0.96224923318600 | 0.51532576138200 |
| 0.47973958511900 | 0.96224963069000 | 0.84865813138500 |
| 0.81307288819200 | 0.96224948621000 | 0.18199139226300 |
| 0.81307288594400 | 0.96224950862400 | 0.51532493627200 |
| 0.81307299457000 | 0.96224940090700 | 0.84865855786200 |
| 0.17852714497900 | 0.95912431733500 | 0.18349177511300 |
| 0.17852740739800 | 0.95912450833100 | 0.51682477566700 |
| 0.17852752090400 | 0.95912449355900 | 0.85015828682700 |
| 0.51186080701700 | 0.95912444075900 | 0.18349114464200 |
| 0.51186065385400 | 0.95912437885800 | 0.51682538722600 |
| 0.51186085219200 | 0.95912464538500 | 0.85015791836400 |
| 0.84519411380000 | 0.95912452096000 | 0.18349120832500 |
| 0.84519409657000 | 0.95912455147300 | 0.51682475680600 |
| 0.84519386350600 | 0.95912447657100 | 0.85015839429400 |
| 0.22205544110300 | 0.37039421187900 | 0.22909168150600 |
| 0.22205548645600 | 0.37039413398600 | 0.56242481802600 |
| 0.22205563694600 | 0.37039423371300 | 0.89575802014500 |
| 0.55538898250600 | 0.37039415543300 | 0.22909123490300 |
| 0.55538882763800 | 0.37039412481700 | 0.56242518286900 |
| 0.55538882994500 | 0.37039408324000 | 0.89575791887400 |
| 0.88872206032500 | 0.37039413811700 | 0.22909137686000 |
| 0.88872218125300 | 0.37039403650400 | 0.56242472962500 |
| 0.88872201102300 | 0.37039424580200 | 0.89575825121800 |
| 0.16959425188500 | 0.37982610799400 | 0.22778300709300 |
| 0.16959425188500 | 0.37982610799400 | 0.56111634042600 |

|                  |                  |                  |
|------------------|------------------|------------------|
| 0.16959425188500 | 0.37982610799400 | 0.89444967375900 |
| 0.50292758521800 | 0.37982610799400 | 0.22778300709300 |
| 0.50292758521800 | 0.37982610799400 | 0.56111634042600 |
| 0.50292758521800 | 0.37982610799400 | 0.89444967375900 |
| 0.83626091855100 | 0.37982610799400 | 0.22778300709300 |
| 0.83626091855100 | 0.37982610799400 | 0.56111634042600 |
| 0.83626091855100 | 0.37982610799400 | 0.89444967375900 |
| 0.16179174842100 | 0.34748130243700 | 0.27054304160300 |
| 0.16179177710500 | 0.34748121133700 | 0.60387605705800 |
| 0.16179182509000 | 0.34748133886100 | 0.93720921016000 |
| 0.49512512226300 | 0.34748134214500 | 0.27054270614200 |
| 0.49512518260900 | 0.34748116611800 | 0.60387631939000 |
| 0.49512513632600 | 0.34748126266300 | 0.93720924936100 |
| 0.82845846637400 | 0.34748127716300 | 0.27054259957200 |
| 0.82845841475600 | 0.34748118698800 | 0.60387598344700 |
| 0.82845833122800 | 0.34748120467200 | 0.93720966377800 |
| 0.16203411617500 | 0.30428947361500 | 0.19495679873000 |
| 0.16203389642700 | 0.30428899477200 | 0.52828980762200 |
| 0.16203399482100 | 0.30428920800000 | 0.86162329786100 |
| 0.49536735034000 | 0.30428932496500 | 0.19495619925700 |
| 0.49536743208200 | 0.30428918946600 | 0.52829053179400 |
| 0.49536730608800 | 0.30428889289600 | 0.86162286278400 |
| 0.82870048119100 | 0.30428889044500 | 0.19495606580200 |
| 0.82870061102600 | 0.30428904518100 | 0.52828981581800 |
| 0.82870052048900 | 0.30428919411300 | 0.86162331653400 |
| 0.22232437953200 | 0.89048026217300 | 0.22905576590300 |
| 0.22232442194300 | 0.89048033726100 | 0.56238890687400 |
| 0.22232457199900 | 0.89048023787000 | 0.89572210872200 |
| 0.55565792081500 | 0.89048032130400 | 0.22905532787300 |
| 0.55565776588600 | 0.89048034488700 | 0.56238926180400 |

|                  |                  |                  |
|------------------|------------------|------------------|
| 0.55565776362300 | 0.89048038424800 | 0.89572201053900 |
| 0.88899099554700 | 0.89048033299600 | 0.22905546714400 |
| 0.88899111374000 | 0.89048043193200 | 0.56238882068400 |
| 0.88899094373900 | 0.89048022373400 | 0.89572233668900 |
| 0.16990748858400 | 0.88049640230400 | 0.22681706969300 |
| 0.16990748858400 | 0.88049640230400 | 0.56015040302700 |
| 0.16990748858400 | 0.88049640230400 | 0.89348373636100 |
| 0.50324082191800 | 0.88049640230400 | 0.22681706969300 |
| 0.50324082191800 | 0.88049640230400 | 0.56015040302700 |
| 0.50324082191800 | 0.88049640230400 | 0.89348373636100 |
| 0.83657415525200 | 0.88049640230400 | 0.22681706969300 |
| 0.83657415525200 | 0.88049640230400 | 0.56015040302700 |
| 0.83657415525200 | 0.88049640230400 | 0.89348373636100 |
| 0.16155510700300 | 0.91249807264700 | 0.26956317980300 |
| 0.16155514001800 | 0.91249817130400 | 0.60289612709300 |
| 0.16155518860800 | 0.91249804192600 | 0.93622929962100 |
| 0.49488847904300 | 0.91249805500000 | 0.26956275641800 |
| 0.49488853475300 | 0.91249819331100 | 0.60289651175300 |
| 0.49488849697100 | 0.91249812846400 | 0.93622929401500 |
| 0.82822182530500 | 0.91249811104000 | 0.26956272388400 |
| 0.82822178048700 | 0.91249819563000 | 0.60289606513300 |
| 0.82822170024300 | 0.91249817845900 | 0.93622973416900 |
| 0.16216367120200 | 0.95644373471600 | 0.19477242318900 |
| 0.16216345336500 | 0.95644419380100 | 0.52810543367400 |
| 0.16216355300600 | 0.95644395879600 | 0.86143891423600 |
| 0.49549689869500 | 0.95644389693700 | 0.19477183877200 |
| 0.49549698881200 | 0.95644397519400 | 0.52810613941600 |
| 0.49549686018700 | 0.95644429319800 | 0.86143849514900 |
| 0.82883002793600 | 0.95644431374100 | 0.19477170347500 |
| 0.82883016626100 | 0.95644414336700 | 0.52810544392100 |

0.82883007777300 0.95644399791700 0.86143893964400

**6) Large supercell 1-H<sub>sol</sub><sup>+</sup> FS**

POSCAR

1

48.68518359261381 0.00000000000000 0.000000000000000  
0.000000000000000 30.38812200000589 0.000000000000000  
0.000000000000000 0.000000000000000 51.63843519240750

Al As H O

540 540 180 72

Direct

0.99993411131200 0.01365053457080 0.00859791231264  
0.00025366912312 0.01342530880630 0.34197951763400  
0.00011772980077 0.01364737761510 0.67537174856600  
0.33354960745300 0.01349374402650 0.00862504773162  
0.33334119819200 0.01343699135290 0.34191350005000  
0.33346974293200 0.01364972032920 0.67537244809000  
0.66677411515200 0.01358504586840 0.00870073943121  
0.66678701879600 0.01354554070200 0.34203524564700  
0.66678487067300 0.01362278786640 0.67537420517200  
0.33265859450700 0.01343464398480 0.23036731147700  
0.33285004522400 0.01377545603500 0.56385176198700  
0.33288099143300 0.01377224681540 0.89720025095600  
0.66616648588100 0.01365979095620 0.23049165924500  
0.66618188019100 0.01378664277330 0.56385841145200  
0.66617513972400 0.01374755862420 0.89717488091600  
0.99981016473300 0.01347820273640 0.23056195877800  
0.99952000217500 0.01378287538050 0.56385209738700  
0.99948591285300 0.01383871042110 0.89722293985200  
0.00098412714588 0.01331360491160 0.11924965770200

|                  |                  |                  |
|------------------|------------------|------------------|
| 0.00057781297988 | 0.01341854178830 | 0.45263810673200 |
| 0.00056469236853 | 0.01348986710520 | 0.78596856988400 |
| 0.33282970967800 | 0.01336966917050 | 0.11941454334700 |
| 0.33390691328500 | 0.01341092561290 | 0.45262188779100 |
| 0.33392917696900 | 0.01347783376660 | 0.78596128858900 |
| 0.66722323040700 | 0.01346177456080 | 0.11930202918400 |
| 0.66724143290100 | 0.01347408121320 | 0.45264941518600 |
| 0.66723525727000 | 0.01348176776090 | 0.78596657279600 |
| 0.16661351291600 | 0.01365877954590 | 0.00904038895847 |
| 0.16653032987400 | 0.01311098331460 | 0.34219311764600 |
| 0.16655329256600 | 0.01329512503010 | 0.67606122643200 |
| 0.49986226693300 | 0.01321010605710 | 0.00943901048690 |
| 0.49985905906100 | 0.01318500170180 | 0.34274343437200 |
| 0.49988093531900 | 0.01325549839990 | 0.67609659911300 |
| 0.83321255926300 | 0.01324969077160 | 0.00942848479550 |
| 0.83321838040400 | 0.01317125048880 | 0.34276292457800 |
| 0.83320984201800 | 0.01324731208990 | 0.67608744505700 |
| 0.16579557026500 | 0.00117895097139 | 0.22368777958500 |
| 0.16472451991200 | 0.00776270407826 | 0.55673491247700 |
| 0.16472565740000 | 0.00776248671619 | 0.89007083262300 |
| 0.49804442125200 | 0.00775995519876 | 0.22339533372300 |
| 0.49805678657200 | 0.00776613052543 | 0.55674589043800 |
| 0.49806149968400 | 0.00776574029185 | 0.89007058526200 |
| 0.83139082241200 | 0.00774882514048 | 0.22341591528800 |
| 0.83139164073600 | 0.00777336716373 | 0.55674195129100 |
| 0.83138744861400 | 0.00776934510223 | 0.89007596456700 |
| 0.16709021674900 | 0.01321914718400 | 0.11931626907300 |
| 0.16220390027400 | 0.97887885504100 | 0.43755235379800 |
| 0.16220390027400 | 0.97887885504100 | 0.77088568713200 |
| 0.49553723360600 | 0.97887885504100 | 0.10421902046400 |



|                  |                  |                  |
|------------------|------------------|------------------|
| 0.49553723360600 | 0.97887885504100 | 0.43755235379800 |
| 0.49553723360600 | 0.97887885504100 | 0.77088568713200 |
| 0.82887056694000 | 0.97887885504100 | 0.10421902046400 |
| 0.82887056694000 | 0.97887885504100 | 0.43755235379800 |
| 0.82887056694000 | 0.97887885504100 | 0.77088568713200 |
| 0.08323167321800 | 0.01367631332200 | 0.00846036630456 |
| 0.08358961087470 | 0.01344735481920 | 0.34208267875600 |
| 0.08350226204840 | 0.01365207174410 | 0.67550753801300 |
| 0.41684508908800 | 0.01358372840540 | 0.00885852269679 |
| 0.41679223749500 | 0.01352506041480 | 0.34216744889200 |
| 0.41684709525000 | 0.01366316669510 | 0.67554336671700 |
| 0.75017321941400 | 0.01361801722660 | 0.00885742569120 |
| 0.75017591602300 | 0.01358948867140 | 0.34222238049200 |
| 0.75016733835200 | 0.01365100706680 | 0.67553697552900 |
| 0.08248653105240 | 0.01264604024240 | 0.23037261617900 |
| 0.08101138459650 | 0.01386804049760 | 0.56268614775200 |
| 0.08097755264220 | 0.01391611760680 | 0.89605409534600 |
| 0.41428772147800 | 0.01358734306240 | 0.22925676814100 |
| 0.41433941939600 | 0.01381858468990 | 0.56269764429200 |
| 0.41435778407300 | 0.01380548283840 | 0.89602460252400 |
| 0.74767387857000 | 0.01364688547540 | 0.22931054440500 |
| 0.74767105981500 | 0.01383472769230 | 0.56270067445800 |
| 0.74767006477900 | 0.01380212513380 | 0.89601889911400 |
| 0.08361349851450 | 0.01303290008040 | 0.11978167869600 |
| 0.08304579773000 | 0.01163284251380 | 0.45455541278000 |
| 0.08306795494200 | 0.01160244879290 | 0.78794107779400 |
| 0.41600208894400 | 0.01139842402010 | 0.12127345834900 |
| 0.41639185060200 | 0.01161971332080 | 0.45463313644700 |
| 0.41641646336700 | 0.01169518418560 | 0.78798941632700 |
| 0.74975002352500 | 0.01159481821780 | 0.12127383340500 |

|                  |                  |                  |
|------------------|------------------|------------------|
| 0.74974590974200 | 0.01167989155030 | 0.45467566293600 |
| 0.74973415144200 | 0.01167228675530 | 0.78798043370000 |
| 0.25008634097900 | 0.01354695922680 | 0.00863712431935 |
| 0.24972808697500 | 0.01353204488360 | 0.34199572627500 |
| 0.24978979940700 | 0.01366862404770 | 0.67551184170800 |
| 0.58308606977300 | 0.01363003638620 | 0.00888201861036 |
| 0.58310017183900 | 0.01360607567050 | 0.34220626869100 |
| 0.58310635140000 | 0.01366360107610 | 0.67554645953700 |
| 0.91639680985200 | 0.01370533811890 | 0.00888670472054 |
| 0.91648456284300 | 0.01354695702850 | 0.34219550289500 |
| 0.91643970182200 | 0.01365822461780 | 0.67553757151500 |
| 0.24987169028700 | 0.01291961853360 | 0.23000866759300 |
| 0.25070342014600 | 0.01449088638030 | 0.56376025348400 |
| 0.25073279569300 | 0.01448333803520 | 0.89711197326300 |
| 0.58402457056900 | 0.01436354807520 | 0.23038931003900 |
| 0.58403885895500 | 0.01446574876150 | 0.56376864655300 |
| 0.58403134898100 | 0.01442360413440 | 0.89708074086900 |
| 0.91741147364000 | 0.01428151807520 | 0.23037799432800 |
| 0.91737404160400 | 0.01444980013040 | 0.56376058558400 |
| 0.91736126480700 | 0.01449774201940 | 0.89711702220100 |
| 0.24992730711500 | 0.01337036087670 | 0.11933396767700 |
| 0.25326948068900 | 0.01425455751380 | 0.45197924290700 |
| 0.25327752030500 | 0.01426112709510 | 0.78536801466000 |
| 0.58656294649000 | 0.01430929070180 | 0.11875516290800 |
| 0.58659399592500 | 0.01434814394030 | 0.45211707524800 |
| 0.58658521390100 | 0.01434902995030 | 0.78543737641900 |
| 0.92001478368200 | 0.01424071482230 | 0.11878588648700 |
| 0.91993354031300 | 0.01429130437170 | 0.45209936630300 |
| 0.91992219200400 | 0.01433613698200 | 0.78543407863300 |
| 0.12493509431500 | 0.06110948997850 | 0.05463811571030 |

|                  |                  |                  |
|------------------|------------------|------------------|
| 0.12642214137900 | 0.06181986351500 | 0.38896482769800 |
| 0.12641271718300 | 0.06177071592580 | 0.72237217895600 |
| 0.45972491783400 | 0.06176379313640 | 0.05577239470270 |
| 0.45975546761000 | 0.06178939383380 | 0.38907019001800 |
| 0.45976063938200 | 0.06179181457440 | 0.72240378332300 |
| 0.79308925927100 | 0.06177136187990 | 0.05572814798970 |
| 0.79308271382600 | 0.06178858131210 | 0.38908939509800 |
| 0.79308245395100 | 0.06178844980670 | 0.72239924954400 |
| 0.12485676886000 | 0.06154144619480 | 0.27673777777300 |
| 0.12497990098200 | 0.06158694637290 | 0.61010505448800 |
| 0.12493010445800 | 0.06158474996370 | 0.94331803798600 |
| 0.45832397076600 | 0.06157960264480 | 0.27681616129200 |
| 0.45831486967600 | 0.06159325625980 | 0.61013524366400 |
| 0.45831470738900 | 0.06158864902070 | 0.94347553165300 |
| 0.79163004373300 | 0.06158904623850 | 0.27682774012200 |
| 0.79164398580200 | 0.06159169365230 | 0.61013252524200 |
| 0.79165501928200 | 0.06159024379790 | 0.94347203366800 |
| 0.12548379073900 | 0.06179256227690 | 0.16595345623900 |
| 0.12504844269900 | 0.06033050187950 | 0.49668321792000 |
| 0.12503497532000 | 0.06034889213100 | 0.83006548518900 |
| 0.45831877332000 | 0.06033869367390 | 0.16339670429100 |
| 0.45836687589300 | 0.06036265154860 | 0.49673693068200 |
| 0.45835775760100 | 0.06035317734640 | 0.83005165726400 |
| 0.79167794905600 | 0.06037472261580 | 0.16343304946800 |
| 0.79168535193600 | 0.06035661355530 | 0.49672878975100 |
| 0.79169152025700 | 0.06035689552740 | 0.83006176413800 |
| 0.29180573601600 | 0.06109046913960 | 0.05462179678580 |
| 0.29167089936000 | 0.06135975955220 | 0.38791329919100 |
| 0.29166199773200 | 0.06127984080430 | 0.72125230915300 |
| 0.62496405810700 | 0.06126773401850 | 0.05460687530210 |

|                  |                  |                  |
|------------------|------------------|------------------|
| 0.62498720906700 | 0.06126754116250 | 0.38794287285100 |
| 0.62497311865700 | 0.06127126737290 | 0.72126215996500 |
| 0.95814849171600 | 0.06120527182560 | 0.05452301179700 |
| 0.95832031396400 | 0.06129175287900 | 0.38796234337700 |
| 0.95830472332900 | 0.06127181436370 | 0.72125755169000 |
| 0.29141747029400 | 0.06126359063260 | 0.27689591209500 |
| 0.29155677229500 | 0.06129983054370 | 0.61020245097100 |
| 0.29160739298300 | 0.06132849222970 | 0.94353115453200 |
| 0.62488148693600 | 0.06130598611950 | 0.27691172382500 |
| 0.62488566350700 | 0.06130337334570 | 0.61022108967900 |
| 0.62487738731600 | 0.06130692016620 | 0.94356819060600 |
| 0.95823944897100 | 0.06127799163380 | 0.27696905269600 |
| 0.95822010772000 | 0.06130535944620 | 0.61021412479600 |
| 0.95818555577700 | 0.06128033541500 | 0.94349955195200 |
| 0.29147634989100 | 0.06122293560690 | 0.16565112821900 |
| 0.29186836005500 | 0.06118792427910 | 0.49878490378100 |
| 0.29188774101300 | 0.06118905722070 | 0.83213658320900 |
| 0.62518683257100 | 0.06116253448010 | 0.16546602527600 |
| 0.62520927319700 | 0.06116348173300 | 0.49879398067000 |
| 0.62519874077900 | 0.06117007099690 | 0.83212695712600 |
| 0.95851519027600 | 0.06109604800070 | 0.16544293368600 |
| 0.95853612307200 | 0.06118168116330 | 0.49880014526400 |
| 0.95853100502800 | 0.06116167484520 | 0.83212200090200 |
| 0.04174814042900 | 0.06105448332670 | 0.05457953769400 |
| 0.04243861056820 | 0.06117941941000 | 0.38840439712300 |
| 0.04245998373750 | 0.06112910749610 | 0.72173769601600 |
| 0.37579051038000 | 0.06109014725910 | 0.05510668079910 |
| 0.37578728754900 | 0.06115205998770 | 0.38842928788100 |
| 0.37581371984100 | 0.06112642060820 | 0.72174100774600 |
| 0.70912399345200 | 0.06112741928100 | 0.05508812453210 |

|                  |                  |                  |
|------------------|------------------|------------------|
| 0.70913382759500 | 0.06111821744680 | 0.38843175335200 |
| 0.70912923090100 | 0.06112462906080 | 0.72174522376500 |
| 0.04167089187780 | 0.06118439873670 | 0.27691898774600 |
| 0.04153195807520 | 0.06120505778540 | 0.61004425090100 |
| 0.04142328500120 | 0.06122429498430 | 0.94328952195100 |
| 0.37485152025300 | 0.06121393326220 | 0.27679306542200 |
| 0.37486711615100 | 0.06121211916760 | 0.61005838639600 |
| 0.37488605412600 | 0.06120907123160 | 0.94339854228600 |
| 0.70820361926400 | 0.06122249189110 | 0.27677595702600 |
| 0.70819459649300 | 0.06121165759030 | 0.61006308094800 |
| 0.70819789903400 | 0.06121660177630 | 0.94340966836100 |
| 0.04177376399890 | 0.06127629231540 | 0.16570701028500 |
| 0.04170412856160 | 0.06121305197940 | 0.49886449134700 |
| 0.04168352985160 | 0.06122644483790 | 0.83221570408000 |
| 0.37487448788800 | 0.06118759941560 | 0.16559780259300 |
| 0.37503630675300 | 0.06122752621580 | 0.49888856413400 |
| 0.37504905425300 | 0.06120107354120 | 0.83221337505400 |
| 0.70834790713900 | 0.06125680233280 | 0.16558891864100 |
| 0.70836859460100 | 0.06120246693310 | 0.49888338090400 |
| 0.70836500213100 | 0.06121339595680 | 0.83221779663300 |
| 0.20837072684500 | 0.06116529114640 | 0.05466644914830 |
| 0.20637702082700 | 0.06129429023580 | 0.38842569558400 |
| 0.20640707464800 | 0.06124792930030 | 0.72184357825300 |
| 0.53971033500600 | 0.06126469483870 | 0.05521709245790 |
| 0.53974247641300 | 0.06126568466040 | 0.38854512503000 |
| 0.53972203089100 | 0.06126673680240 | 0.72187729270700 |
| 0.87303504064100 | 0.06126383868290 | 0.05520673164130 |
| 0.87305845517400 | 0.06126308906550 | 0.38856664511400 |
| 0.87305565956400 | 0.06126603999290 | 0.72187234485200 |
| 0.20798548429000 | 0.06137084958740 | 0.27698757401100 |

|                  |                  |                  |
|------------------|------------------|------------------|
| 0.20781291905600 | 0.06143464969950 | 0.61037596377300 |
| 0.20788169036300 | 0.06144090605590 | 0.94361194693900 |
| 0.54115386648200 | 0.06142847865360 | 0.27707518072300 |
| 0.54114399793300 | 0.06144021161420 | 0.61040795433000 |
| 0.54113365581200 | 0.06143998701240 | 0.94375381584800 |
| 0.87446355969800 | 0.06143433222620 | 0.27710833388800 |
| 0.87447550560600 | 0.06144128421460 | 0.61040457190600 |
| 0.87448293278100 | 0.06143701794380 | 0.94373251748900 |
| 0.20767864817600 | 0.06127504060920 | 0.16568897452900 |
| 0.20822613204000 | 0.06329333687680 | 0.49907475812600 |
| 0.20824532434000 | 0.06327383863880 | 0.83242855140000 |
| 0.54157781850000 | 0.06327925082060 | 0.16575449508600 |
| 0.54159197665000 | 0.06327414529510 | 0.49909043197400 |
| 0.54157971221400 | 0.06326820379000 | 0.83241591956600 |
| 0.87488956109900 | 0.06329011159720 | 0.16575102847500 |
| 0.87491312076200 | 0.06326344926490 | 0.49908932824200 |
| 0.87491891904800 | 0.06327009705970 | 0.83241614661400 |
| 0.00000000000000 | 0.13043999660500 | 0.00000000000000 |
| 0.00000000000000 | 0.13043999660500 | 0.33333333333200 |
| 0.00000000000000 | 0.13043999660500 | 0.66666666666800 |
| 0.33333333333200 | 0.13043999660500 | 0.00000000000000 |
| 0.33333333333200 | 0.13043999660500 | 0.33333333333200 |
| 0.33333333333200 | 0.13043999660500 | 0.66666666666800 |
| 0.66666666666800 | 0.13043999660500 | 0.00000000000000 |
| 0.66666666666800 | 0.13043999660500 | 0.33333333333200 |
| 0.66666666666800 | 0.13043999660500 | 0.66666666666800 |
| 0.00000000000000 | 0.13043999660500 | 0.22222334138000 |
| 0.00000000000000 | 0.13043999660500 | 0.55555667471300 |
| 0.00000000000000 | 0.13043999660500 | 0.88889000804700 |
| 0.33333333333200 | 0.13043999660500 | 0.22222334138000 |

|                  |                  |                  |
|------------------|------------------|------------------|
| 0.3333333333200  | 0.13043999660500 | 0.55555667471300 |
| 0.3333333333200  | 0.13043999660500 | 0.88889000804700 |
| 0.6666666666800  | 0.13043999660500 | 0.22222334138000 |
| 0.6666666666800  | 0.13043999660500 | 0.55555667471300 |
| 0.6666666666800  | 0.13043999660500 | 0.88889000804700 |
| 0.00000000000000 | 0.13043999660500 | 0.11111000180100 |
| 0.00000000000000 | 0.13043999660500 | 0.44444333513300 |
| 0.00000000000000 | 0.13043999660500 | 0.77777666846700 |
| 0.3333333333200  | 0.13043999660500 | 0.11111000180100 |
| 0.3333333333200  | 0.13043999660500 | 0.44444333513300 |
| 0.3333333333200  | 0.13043999660500 | 0.77777666846700 |
| 0.6666666666800  | 0.13043999660500 | 0.11111000180100 |
| 0.6666666666800  | 0.13043999660500 | 0.44444333513300 |
| 0.6666666666800  | 0.13043999660500 | 0.77777666846700 |
| 0.16666666667500 | 0.13043999660500 | 0.00000000000000 |
| 0.16666666667500 | 0.13043999660500 | 0.3333333333200  |
| 0.16666666667500 | 0.13043999660500 | 0.6666666666800  |
| 0.5000000000700  | 0.13043999660500 | 0.00000000000000 |
| 0.5000000000700  | 0.13043999660500 | 0.3333333333200  |
| 0.5000000000700  | 0.13043999660500 | 0.6666666666800  |
| 0.8333333334100  | 0.13043999660500 | 0.00000000000000 |
| 0.8333333334100  | 0.13043999660500 | 0.3333333333200  |
| 0.8333333334100  | 0.13043999660500 | 0.6666666666800  |
| 0.16666666667500 | 0.13043999660500 | 0.22222334138000 |
| 0.16666666667500 | 0.13043999660500 | 0.55555667471300 |
| 0.16666666667500 | 0.13043999660500 | 0.88889000804700 |
| 0.5000000000700  | 0.13043999660500 | 0.22222334138000 |
| 0.5000000000700  | 0.13043999660500 | 0.55555667471300 |
| 0.5000000000700  | 0.13043999660500 | 0.88889000804700 |
| 0.8333333334100  | 0.13043999660500 | 0.22222334138000 |

|                  |                  |                  |
|------------------|------------------|------------------|
| 0.83333333334100 | 0.13043999660500 | 0.55555667471300 |
| 0.83333333334100 | 0.13043999660500 | 0.88889000804700 |
| 0.16666666667500 | 0.13043999660500 | 0.11111000180100 |
| 0.16666666667500 | 0.13043999660500 | 0.44444333513300 |
| 0.16666666667500 | 0.13043999660500 | 0.77777666846700 |
| 0.5000000000700  | 0.13043999660500 | 0.11111000180100 |
| 0.5000000000700  | 0.13043999660500 | 0.44444333513300 |
| 0.5000000000700  | 0.13043999660500 | 0.77777666846700 |
| 0.83333333334100 | 0.13043999660500 | 0.11111000180100 |
| 0.83333333334100 | 0.13043999660500 | 0.44444333513300 |
| 0.83333333334100 | 0.13043999660500 | 0.77777666846700 |
| 0.08333333332670 | 0.13043999660500 | 0.00000000000000 |
| 0.08333333332670 | 0.13043999660500 | 0.3333333333200  |
| 0.08333333332670 | 0.13043999660500 | 0.6666666666800  |
| 0.4166666666100  | 0.13043999660500 | 0.00000000000000 |
| 0.4166666666100  | 0.13043999660500 | 0.3333333333200  |
| 0.4166666666100  | 0.13043999660500 | 0.6666666666800  |
| 0.7499999999300  | 0.13043999660500 | 0.00000000000000 |
| 0.7499999999300  | 0.13043999660500 | 0.3333333333200  |
| 0.7499999999300  | 0.13043999660500 | 0.6666666666800  |
| 0.08333333332670 | 0.13043999660500 | 0.22222334138000 |
| 0.08333333332670 | 0.13043999660500 | 0.55555667471300 |
| 0.08333333332670 | 0.13043999660500 | 0.88889000804700 |
| 0.4166666666100  | 0.13043999660500 | 0.22222334138000 |
| 0.4166666666100  | 0.13043999660500 | 0.55555667471300 |
| 0.4166666666100  | 0.13043999660500 | 0.88889000804700 |
| 0.7499999999300  | 0.13043999660500 | 0.22222334138000 |
| 0.7499999999300  | 0.13043999660500 | 0.55555667471300 |
| 0.7499999999300  | 0.13043999660500 | 0.88889000804700 |
| 0.08333333332670 | 0.13043999660500 | 0.11111000180100 |



|                  |                  |                  |
|------------------|------------------|------------------|
| 0.0833333332670  | 0.13043999660500 | 0.44444333513300 |
| 0.0833333332670  | 0.13043999660500 | 0.77777666846700 |
| 0.4166666666100  | 0.13043999660500 | 0.11111000180100 |
| 0.4166666666100  | 0.13043999660500 | 0.44444333513300 |
| 0.4166666666100  | 0.13043999660500 | 0.77777666846700 |
| 0.7499999999300  | 0.13043999660500 | 0.11111000180100 |
| 0.7499999999300  | 0.13043999660500 | 0.44444333513300 |
| 0.7499999999300  | 0.13043999660500 | 0.77777666846700 |
| 0.25000000008900 | 0.13043999660500 | 0.00000000000000 |
| 0.25000000008900 | 0.13043999660500 | 0.3333333333200  |
| 0.25000000008900 | 0.13043999660500 | 0.6666666666800  |
| 0.58333333342100 | 0.13043999660500 | 0.00000000000000 |
| 0.58333333342100 | 0.13043999660500 | 0.3333333333200  |
| 0.58333333342100 | 0.13043999660500 | 0.6666666666800  |
| 0.91666666675500 | 0.13043999660500 | 0.00000000000000 |
| 0.91666666675500 | 0.13043999660500 | 0.3333333333200  |
| 0.91666666675500 | 0.13043999660500 | 0.6666666666800  |
| 0.25000000008900 | 0.13043999660500 | 0.22222334138000 |
| 0.25000000008900 | 0.13043999660500 | 0.55555667471300 |
| 0.25000000008900 | 0.13043999660500 | 0.88889000804700 |
| 0.58333333342100 | 0.13043999660500 | 0.22222334138000 |
| 0.58333333342100 | 0.13043999660500 | 0.55555667471300 |
| 0.58333333342100 | 0.13043999660500 | 0.88889000804700 |
| 0.91666666675500 | 0.13043999660500 | 0.22222334138000 |
| 0.91666666675500 | 0.13043999660500 | 0.55555667471300 |
| 0.91666666675500 | 0.13043999660500 | 0.88889000804700 |
| 0.25000000008900 | 0.13043999660500 | 0.11111000180100 |
| 0.25000000008900 | 0.13043999660500 | 0.44444333513300 |
| 0.25000000008900 | 0.13043999660500 | 0.77777666846700 |
| 0.58333333342100 | 0.13043999660500 | 0.11111000180100 |

|                  |                  |                  |
|------------------|------------------|------------------|
| 0.58333333342100 | 0.13043999660500 | 0.44444333513300 |
| 0.58333333342100 | 0.13043999660500 | 0.77777666846700 |
| 0.91666666675500 | 0.13043999660500 | 0.11111000180100 |
| 0.91666666675500 | 0.13043999660500 | 0.44444333513300 |
| 0.91666666675500 | 0.13043999660500 | 0.77777666846700 |
| 0.12493750005400 | 0.19977546234700 | 0.05464254370510 |
| 0.12641360509400 | 0.19908925426500 | 0.38894618078500 |
| 0.12640219831400 | 0.19913660809400 | 0.72235482411500 |
| 0.45971390849200 | 0.19914167792400 | 0.05575730234140 |
| 0.45974478223700 | 0.19911622899400 | 0.38905464739700 |
| 0.45975030161300 | 0.19911354502000 | 0.72238798402300 |
| 0.79307864345700 | 0.19913476335600 | 0.05571228460780 |
| 0.79307273885100 | 0.19911641009000 | 0.38907388252600 |
| 0.79307214057500 | 0.19911673225400 | 0.72238343091700 |
| 0.12487418211200 | 0.19940705878600 | 0.27672781105000 |
| 0.12497103696500 | 0.19924389042500 | 0.61013582969900 |
| 0.12492177266000 | 0.19924472354100 | 0.94334965989700 |
| 0.45831448561800 | 0.19925068285300 | 0.27684752899000 |
| 0.45830578938900 | 0.19923682982800 | 0.61016616578500 |
| 0.45830555806500 | 0.19924162485900 | 0.94350636034900 |
| 0.79162134100000 | 0.19924093732300 | 0.27685907799400 |
| 0.79163482672300 | 0.19923852949300 | 0.61016335427800 |
| 0.79164594208800 | 0.19923980577400 | 0.94350304808800 |
| 0.12550672656600 | 0.19912467023300 | 0.16597016992300 |
| 0.12504613710800 | 0.20052491074200 | 0.49669540274400 |
| 0.12503265303700 | 0.20050538157300 | 0.83007878408300 |
| 0.45831533318800 | 0.20051530361000 | 0.16341129076000 |
| 0.45836461205700 | 0.20049051351700 | 0.49675038804000 |
| 0.45835549338800 | 0.20050045800000 | 0.83006496709800 |
| 0.79167495932300 | 0.20047773699300 | 0.16344710553200 |

|                  |                  |                  |
|------------------|------------------|------------------|
| 0.79168268503200 | 0.20049674059200 | 0.49674257711800 |
| 0.79168906408800 | 0.20049649561700 | 0.83007538296900 |
| 0.29180547912500 | 0.19980028844500 | 0.05462071595070 |
| 0.29167672533100 | 0.19954471589600 | 0.38790101299700 |
| 0.29166748968000 | 0.19962090753300 | 0.72124088017300 |
| 0.62496945948200 | 0.19963262475000 | 0.05459626790450 |
| 0.62499223144400 | 0.19963272664700 | 0.38793220197800 |
| 0.62497868702400 | 0.19962887475600 | 0.72125140007000 |
| 0.95815521484000 | 0.19969011808300 | 0.05451544330010 |
| 0.95832532866100 | 0.19961024047000 | 0.38795191296000 |
| 0.95831064966700 | 0.19962828550800 | 0.72124691941500 |
| 0.29141687351000 | 0.19964021514600 | 0.27689584974400 |
| 0.29156390098600 | 0.19958469114900 | 0.61020795225200 |
| 0.29161483470400 | 0.19955632670300 | 0.94353678648500 |
| 0.62488897310100 | 0.19957914441400 | 0.27691779007100 |
| 0.62489253578900 | 0.19958148777600 | 0.61022688908000 |
| 0.62488428658400 | 0.19957824000700 | 0.94357405190900 |
| 0.95825213175500 | 0.19960721515800 | 0.27697534578300 |
| 0.95822701305300 | 0.19957954252100 | 0.61021979669800 |
| 0.95819286743700 | 0.19960205463300 | 0.94350589970100 |
| 0.29147150070700 | 0.19967316078900 | 0.16565774084700 |
| 0.29187849465400 | 0.19969046061800 | 0.49878467018500 |
| 0.29189785985500 | 0.19968876395100 | 0.83213724505600 |
| 0.62519633989100 | 0.19971440376700 | 0.16546664921900 |
| 0.62521890061200 | 0.19971371095500 | 0.49879407335500 |
| 0.62520839759400 | 0.19970765203800 | 0.83212701682700 |
| 0.95852942726800 | 0.19977807074800 | 0.16544671290500 |
| 0.95854568946400 | 0.19969620024500 | 0.49880060939200 |
| 0.95854066339200 | 0.19971563458300 | 0.83212199215700 |
| 0.04175305028520 | 0.19983780271000 | 0.05457677406420 |

|                  |                  |                  |
|------------------|------------------|------------------|
| 0.04243870788860 | 0.19971814605500 | 0.38839684039400 |
| 0.04246061164500 | 0.19976688694000 | 0.72173006401400 |
| 0.37578807447400 | 0.19980251078800 | 0.05510293952720 |
| 0.37578793736200 | 0.19974623611300 | 0.38842198359400 |
| 0.37581361260500 | 0.19976872841700 | 0.72173358828500 |
| 0.70912428687700 | 0.19976790263300 | 0.05508107980140 |
| 0.70913404734600 | 0.19977573404600 | 0.38842545761500 |
| 0.70912949060600 | 0.19977039905400 | 0.72173792065000 |
| 0.04168396155070 | 0.19970824008900 | 0.27692316067700 |
| 0.04153069928270 | 0.19967318300100 | 0.61005603610400 |
| 0.04142169013560 | 0.19965552900300 | 0.94330055021100 |
| 0.37484752817700 | 0.19966925011100 | 0.27680402126100 |
| 0.37486537421500 | 0.19966629044100 | 0.61007010504700 |
| 0.37488419578400 | 0.19966927202100 | 0.94340989415000 |
| 0.70820246822400 | 0.19965704949600 | 0.27678576679800 |
| 0.70819305749600 | 0.19966671974000 | 0.61007452619500 |
| 0.70819620795700 | 0.19966213720400 | 0.94342058320200 |
| 0.04179430611990 | 0.19961390162600 | 0.16572147269700 |
| 0.04171086033400 | 0.19966638745800 | 0.49887297320400 |
| 0.04169057231320 | 0.19965416948200 | 0.83222365901300 |
| 0.37487714691400 | 0.19969471206800 | 0.16560730671000 |
| 0.37504315560100 | 0.19965246937500 | 0.49889678062200 |
| 0.37505563268000 | 0.19967740424300 | 0.83222198780000 |
| 0.70835429810700 | 0.19962427415500 | 0.16559668085600 |
| 0.70837507495000 | 0.19967623839000 | 0.49889185903700 |
| 0.70837145587300 | 0.19966612892700 | 0.83222604889600 |
| 0.20837261543900 | 0.19972059663800 | 0.05467335298520 |
| 0.20639017314600 | 0.19960126627200 | 0.38841360635900 |
| 0.20642032693700 | 0.19964017245400 | 0.72183563705500 |
| 0.53972377794200 | 0.19962258795900 | 0.05520937726250 |

|                  |                  |                  |
|------------------|------------------|------------------|
| 0.53975494258800 | 0.19962171509600 | 0.38853681324700 |
| 0.53973519492000 | 0.19962081295600 | 0.72186932946500 |
| 0.87304844557600 | 0.19962324390600 | 0.05519891238960 |
| 0.87307149734000 | 0.19962446352400 | 0.38855856356100 |
| 0.87306913870900 | 0.19962159975900 | 0.72186430249900 |
| 0.20799194676500 | 0.19956871966700 | 0.27697634668700 |
| 0.20782706611200 | 0.19939147373000 | 0.61040727357700 |
| 0.20789515569500 | 0.19938449289200 | 0.94364448642900 |
| 0.54116773426500 | 0.19939817424200 | 0.27710625084100 |
| 0.54115761929800 | 0.19938620130200 | 0.61043928318700 |
| 0.54114711696000 | 0.19938661468100 | 0.94378528170700 |
| 0.87447844577500 | 0.19939269707500 | 0.27713982789400 |
| 0.87448917507300 | 0.19938517571000 | 0.61043588399200 |
| 0.87449667606000 | 0.19938947948200 | 0.94376354745400 |
| 0.20767048371600 | 0.19961388134700 | 0.16571059600400 |
| 0.20823382657500 | 0.19756907778300 | 0.49908945186600 |
| 0.20825275997300 | 0.19758856767800 | 0.83244318399500 |
| 0.54158515530000 | 0.19758356701900 | 0.16576879748300 |
| 0.54159933435800 | 0.19758831254500 | 0.49910508228700 |
| 0.54158694784400 | 0.19759457303900 | 0.83243045039500 |
| 0.87489811277600 | 0.19757318628700 | 0.16576576011800 |
| 0.87492033907000 | 0.19759920185400 | 0.49910380498200 |
| 0.87492619923200 | 0.19759243787500 | 0.83243074227100 |
| 0.99993659929700 | 0.24728910225500 | 0.00860499763591 |
| 0.00025641376089 | 0.24751443321900 | 0.34198440154600 |
| 0.00011986793242 | 0.24729824509500 | 0.67537640597700 |
| 0.33354964902500 | 0.24744242218400 | 0.00863340837365 |
| 0.33334276866500 | 0.24750162394500 | 0.34191765542700 |
| 0.33347127516500 | 0.24729648264700 | 0.67537750305800 |
| 0.66677675510100 | 0.24735756556800 | 0.00870640246812 |

|                  |                  |                  |
|------------------|------------------|------------------|
| 0.66678941673100 | 0.24739540747600 | 0.34204183265200 |
| 0.66678712816700 | 0.24732187040400 | 0.67537915737700 |
| 0.33265876264600 | 0.24748083139800 | 0.23037581826800 |
| 0.33286446566400 | 0.24713601620200 | 0.56385897279200 |
| 0.33289612402800 | 0.24714075561400 | 0.89720759656800 |
| 0.66618110407300 | 0.24725027055200 | 0.23049878089300 |
| 0.66619600215700 | 0.24712410637500 | 0.56386579387500 |
| 0.66618914781400 | 0.24716480025500 | 0.89718171355500 |
| 0.99984049293000 | 0.24743911198700 | 0.23056927338900 |
| 0.99953434415200 | 0.24712828596600 | 0.56385950711600 |
| 0.99950059214900 | 0.24707247543500 | 0.89722944479300 |
| 0.00099815750555 | 0.24758017006400 | 0.11924929141100 |
| 0.00058791367920 | 0.24747930256900 | 0.45263382659200 |
| 0.00057572323265 | 0.24740711405400 | 0.78596435764400 |
| 0.33283542467300 | 0.24753627696400 | 0.11941542554200 |
| 0.33391766631400 | 0.24748619399600 | 0.45261745940800 |
| 0.33394012491400 | 0.24741818368500 | 0.78595700002100 |
| 0.66723420069900 | 0.24743519343800 | 0.11929780600400 |
| 0.66725205297000 | 0.24742090712600 | 0.45264543408900 |
| 0.66724604405700 | 0.24741451092100 | 0.78596238737200 |
| 0.16661470607600 | 0.24724080790000 | 0.00906844404856 |
| 0.16653176258800 | 0.24780305802200 | 0.34218950252900 |
| 0.16655294265600 | 0.24760412488900 | 0.67608582470500 |
| 0.49986095157400 | 0.24768529892700 | 0.00946488781199 |
| 0.49985847877600 | 0.24771175374700 | 0.34276823810200 |
| 0.49988020762400 | 0.24763969324700 | 0.67612235141900 |
| 0.83321188809100 | 0.24764478017500 | 0.00945422535309 |
| 0.83321859604600 | 0.24772634060500 | 0.34278814801100 |
| 0.83320913284200 | 0.24764810870100 | 0.67611278604100 |
| 0.16583542961800 | 0.25990495661400 | 0.22374735506200 |

|                  |                  |                  |
|------------------|------------------|------------------|
| 0.16471159911900 | 0.25300804893200 | 0.55679007130400 |
| 0.16471333647300 | 0.25300862573700 | 0.89012619191400 |
| 0.49803026156200 | 0.25301188257100 | 0.22345040956100 |
| 0.49804371573200 | 0.25300522931100 | 0.55680137689900 |
| 0.49804826749300 | 0.25300587180700 | 0.89012582648100 |
| 0.83137930220100 | 0.25302246657900 | 0.22347137268600 |
| 0.83137869479100 | 0.25299815657000 | 0.55679743909300 |
| 0.83137427914900 | 0.25300231620200 | 0.89013135726700 |
| 0.16709210609500 | 0.24770278207300 | 0.11932398568200 |
| 0.16221641435900 | 0.28186551001800 | 0.43757928824600 |
| 0.16221641435900 | 0.28186551001800 | 0.77091262157800 |
| 0.49554974769100 | 0.28186551001800 | 0.10424595491200 |
| 0.49554974769100 | 0.28186551001800 | 0.43757928824600 |
| 0.49554974769100 | 0.28186551001800 | 0.77091262157800 |
| 0.82888308102500 | 0.28186551001800 | 0.10424595491200 |
| 0.82888308102500 | 0.28186551001800 | 0.43757928824600 |
| 0.82888308102500 | 0.28186551001800 | 0.77091262157800 |
| 0.08323243550300 | 0.24725153731300 | 0.00847455789340 |
| 0.08359071404970 | 0.24748547981900 | 0.34208089988900 |
| 0.08350046939010 | 0.24728574020800 | 0.67551869374900 |
| 0.41684165689500 | 0.24734970047000 | 0.00887091466894 |
| 0.41678995389000 | 0.24740969488600 | 0.34217975234000 |
| 0.41684477896600 | 0.24727264938000 | 0.67555518758600 |
| 0.75017079433400 | 0.24731770182600 | 0.00886899306151 |
| 0.75017320658000 | 0.24734486779600 | 0.34223411024200 |
| 0.75016516351400 | 0.24728480396700 | 0.67554897601100 |
| 0.08255178412000 | 0.24833382012900 | 0.23039830285800 |
| 0.08102251342700 | 0.24701054137400 | 0.56273270174200 |
| 0.08098953678760 | 0.24696625512100 | 0.89609955257900 |
| 0.41429474837800 | 0.24729083357500 | 0.22930406478100 |

|                  |                  |                  |
|------------------|------------------|------------------|
| 0.41435073792200 | 0.24705716887000 | 0.56274499444100 |
| 0.41436919894600 | 0.24706991021400 | 0.89607182238200 |
| 0.74768618030500 | 0.24723003529200 | 0.22935761953400 |
| 0.74768236774300 | 0.24704176928700 | 0.56274798524200 |
| 0.74768129081700 | 0.24707390938100 | 0.89606606779200 |
| 0.08362666528350 | 0.24787381945000 | 0.11978486730200 |
| 0.08305356818660 | 0.24924733356000 | 0.45455505640400 |
| 0.08307540138630 | 0.24927825973700 | 0.78794126875600 |
| 0.41600889939200 | 0.24948058294100 | 0.12127465386300 |
| 0.41639915879500 | 0.24925940969000 | 0.45463480520400 |
| 0.41642444833600 | 0.24917910826700 | 0.78799055429200 |
| 0.74975677249900 | 0.24928479641000 | 0.12127456048200 |
| 0.74975374417200 | 0.24919565768000 | 0.45467723157300 |
| 0.74974191702600 | 0.24920390771500 | 0.78798175999600 |
| 0.25008858353200 | 0.24737715493000 | 0.00865239062741 |
| 0.24973422415300 | 0.24739496912100 | 0.34199389237000 |
| 0.24979579105700 | 0.24726599261000 | 0.67552198786900 |
| 0.58309184373800 | 0.24730170296500 | 0.00889314484705 |
| 0.58310602530100 | 0.24732511073900 | 0.34221738276300 |
| 0.58311210846800 | 0.24726905282400 | 0.67555739012500 |
| 0.91640261271300 | 0.24722443596900 | 0.00889864454883 |
| 0.91649199045100 | 0.24738487234400 | 0.34220603910200 |
| 0.91644549431200 | 0.24727480069600 | 0.67554834445900 |
| 0.24983731766400 | 0.24802891849900 | 0.23003436078500 |
| 0.25074103251300 | 0.24635957786400 | 0.56377648910100 |
| 0.25077053644800 | 0.24636894880400 | 0.89712755583900 |
| 0.58406108728300 | 0.24648835010200 | 0.23040468153500 |
| 0.58407627381000 | 0.24638333366400 | 0.56378497136700 |
| 0.58406848771000 | 0.24642774271200 | 0.89709591404100 |
| 0.91745536090400 | 0.24657182432000 | 0.23039497731400 |



|                  |                  |                  |
|------------------|------------------|------------------|
| 0.91741153047400 | 0.24639986120000 | 0.56377659667600 |
| 0.91739839132500 | 0.24635225877500 | 0.89713297707400 |
| 0.24993696763400 | 0.24754781701600 | 0.11933886094000 |
| 0.25328923998600 | 0.24663516985700 | 0.45196850458100 |
| 0.25329685604000 | 0.24662745724900 | 0.78535746478600 |
| 0.58658269798700 | 0.24658033234500 | 0.11874485845200 |
| 0.58661343492800 | 0.24653838659500 | 0.45210728840600 |
| 0.58660464046700 | 0.24653780582900 | 0.78542767658100 |
| 0.92003397942400 | 0.24664401502400 | 0.11877594223100 |
| 0.91995290791400 | 0.24659859914400 | 0.45208890337100 |
| 0.91994176740900 | 0.24655189163400 | 0.78542401345200 |
| 0.12481185244500 | 0.98948371984300 | 0.03114747538080 |
| 0.12499874036500 | 0.98990572375900 | 0.36514704740700 |
| 0.12490895468000 | 0.98980113789100 | 0.69851351395300 |
| 0.45822565991400 | 0.98975946605100 | 0.03187066423610 |
| 0.45822494430400 | 0.98979435398700 | 0.36520706637200 |
| 0.45823294412200 | 0.98979338800600 | 0.69854809167300 |
| 0.79156837970100 | 0.98976466887400 | 0.03185945326400 |
| 0.79156471514900 | 0.98977945540900 | 0.36521524779800 |
| 0.79156317791700 | 0.98979282209000 | 0.69853990658300 |
| 0.12458836076500 | 0.99216522676900 | 0.25218241542900 |
| 0.12410299803600 | 0.99251541016600 | 0.58392591589100 |
| 0.12409483638200 | 0.99248164983000 | 0.91724551767100 |
| 0.45745282860900 | 0.99255663905300 | 0.25056629018000 |
| 0.45744273339600 | 0.99252220017800 | 0.58393506222800 |
| 0.45744646066100 | 0.99251669722300 | 0.91725608490300 |
| 0.79076592257700 | 0.99251987828100 | 0.25059014243600 |
| 0.79077225778500 | 0.99252483422300 | 0.58392795057100 |
| 0.79077374408800 | 0.99252310787500 | 0.91726144875400 |
| 0.12552895904900 | 0.98987027718700 | 0.14224906468900 |

|                  |                  |                  |
|------------------|------------------|------------------|
| 0.12551395393000 | 0.98795650282200 | 0.47482359827700 |
| 0.12555231156100 | 0.98801199782200 | 0.80819353595700 |
| 0.45867951383100 | 0.98810314467600 | 0.14142333098500 |
| 0.45889176934100 | 0.98806940580300 | 0.47484396333500 |
| 0.45888398068500 | 0.98807919415000 | 0.80815847779000 |
| 0.79222831549400 | 0.98810130994400 | 0.14151323615000 |
| 0.79222790865200 | 0.98808994471000 | 0.47483018644100 |
| 0.79221818823000 | 0.98807122146900 | 0.80816851770100 |
| 0.29171418405300 | 0.98952713082800 | 0.03104733940340 |
| 0.29161214820000 | 0.98979368405900 | 0.36453143724500 |
| 0.29164895010400 | 0.98975241496900 | 0.69781808449600 |
| 0.62498325475100 | 0.98972887795500 | 0.03114772421870 |
| 0.62499011409600 | 0.98972751298500 | 0.36448070610900 |
| 0.62498459898400 | 0.98973189742500 | 0.69781905355900 |
| 0.95827716906100 | 0.98960738303100 | 0.03112433570620 |
| 0.95836050195900 | 0.98980396328200 | 0.36446584102100 |
| 0.95831852570800 | 0.98973290799800 | 0.69782112475700 |
| 0.29123858770400 | 0.98966689589600 | 0.25323783570500 |
| 0.29139890645600 | 0.98920191503300 | 0.58678458618800 |
| 0.29140030933400 | 0.98920513860000 | 0.92013220416000 |
| 0.62473308588200 | 0.98920676822900 | 0.25344832913400 |
| 0.62473597588400 | 0.98920313921100 | 0.58678462418000 |
| 0.62473257838900 | 0.98920849475200 | 0.92011681369500 |
| 0.95812320279600 | 0.98928948361600 | 0.25340396561900 |
| 0.95806660686100 | 0.98920340868800 | 0.58678990281900 |
| 0.95806145449200 | 0.98915422851100 | 0.92011392288900 |
| 0.29130942048400 | 0.98965044682000 | 0.14215355666300 |
| 0.29281919331600 | 0.98871462403100 | 0.47590701698900 |
| 0.29283043885400 | 0.98872847774600 | 0.80923262770700 |
| 0.62616426879200 | 0.98867646622500 | 0.14254589150500 |

|                  |                  |                  |
|------------------|------------------|------------------|
| 0.62617821786800 | 0.98867857579800 | 0.47589496403400 |
| 0.62617278686300 | 0.98869301373000 | 0.80922623738500 |
| 0.95981137819200 | 0.98858137913000 | 0.14245321040600 |
| 0.95949500304700 | 0.98868864492800 | 0.47592579666700 |
| 0.95950991781600 | 0.98867554507700 | 0.80922845993700 |
| 0.04165670705200 | 0.98953100891000 | 0.03106432433510 |
| 0.04177235878180 | 0.98971349004600 | 0.36468097737200 |
| 0.04174482779750 | 0.98973485208500 | 0.69795959214000 |
| 0.37508906505800 | 0.98962756297000 | 0.03125465023600 |
| 0.37502280019300 | 0.98980016855400 | 0.36461747061100 |
| 0.37507212722600 | 0.98971613827100 | 0.69796312954600 |
| 0.70840768680000 | 0.98973269266000 | 0.03128760106770 |
| 0.70840083151300 | 0.98970367046600 | 0.36462608360700 |
| 0.70840208002600 | 0.98971782818700 | 0.69795943683800 |
| 0.04100659394810 | 0.98940422276700 | 0.25340858907900 |
| 0.04078470895680 | 0.98915899655100 | 0.58667189723700 |
| 0.04077382189810 | 0.98913296048900 | 0.92001396270400 |
| 0.37409830720500 | 0.98930019183300 | 0.25330309154400 |
| 0.37411488128100 | 0.98915638925900 | 0.58668455523500 |
| 0.37412214878200 | 0.98913679875700 | 0.92000860413900 |
| 0.70744620228400 | 0.98917547275200 | 0.25334796623200 |
| 0.70744468542700 | 0.98915738654800 | 0.58667772747600 |
| 0.70744578989400 | 0.98916754867300 | 0.92001078285600 |
| 0.04204052711910 | 0.98932815302100 | 0.14241379615300 |
| 0.04089289179790 | 0.98879696385600 | 0.47631850010100 |
| 0.04090004295380 | 0.98883578743100 | 0.80964809826600 |
| 0.37363097876200 | 0.98896222622500 | 0.14283141837700 |
| 0.37423170315800 | 0.98881342947400 | 0.47633984390600 |
| 0.37422104153700 | 0.98879378446300 | 0.80963477229200 |
| 0.70757100274700 | 0.98888862326300 | 0.14298756301600 |

|                  |                  |                  |
|------------------|------------------|------------------|
| 0.70755441394900 | 0.98879693990100 | 0.47630201923700 |
| 0.70755282445400 | 0.98881568590200 | 0.80963781100000 |
| 0.20838801842600 | 0.98945826797200 | 0.03116851267800 |
| 0.20829068128000 | 0.98950206923800 | 0.36476244636000 |
| 0.20837915217900 | 0.98934923292300 | 0.69818394805300 |
| 0.54171098611700 | 0.98932562623600 | 0.03154905090520 |
| 0.54171665896100 | 0.98933757336900 | 0.36487504164400 |
| 0.54171400709700 | 0.98934162102000 | 0.69821541874000 |
| 0.87504112937300 | 0.98932765302600 | 0.03155707946890 |
| 0.87505526330700 | 0.98935026196800 | 0.36487124626200 |
| 0.87504700363200 | 0.98934412995600 | 0.69821303453300 |
| 0.20743355045200 | 0.99176641255400 | 0.25190923172600 |
| 0.20665139479800 | 0.99200885209700 | 0.58349386573300 |
| 0.20663831460200 | 0.99199390559900 | 0.91681999486400 |
| 0.54001082656500 | 0.99201482519300 | 0.25013645808300 |
| 0.53999045181100 | 0.99201323729800 | 0.58349388168300 |
| 0.53998982507200 | 0.99201121614800 | 0.91682086679300 |
| 0.87332519373300 | 0.99203755385100 | 0.25013474175100 |
| 0.87331845259200 | 0.99201383389700 | 0.58349512157700 |
| 0.87332018865600 | 0.99200699439400 | 0.91682922427600 |
| 0.20844133987500 | 0.98954122787400 | 0.14201864768200 |
| 0.20669107931500 | 0.99821666710900 | 0.46877474167400 |
| 0.20669107931500 | 0.99821666710900 | 0.80210807500600 |
| 0.54002441264900 | 0.99821666710900 | 0.13544140834000 |
| 0.54002441264900 | 0.99821666710900 | 0.46877474167400 |
| 0.54002441264900 | 0.99821666710900 | 0.80210807500600 |
| 0.87335774598300 | 0.99821666710900 | 0.13544140834000 |
| 0.87335774598300 | 0.99821666710900 | 0.46877474167400 |
| 0.87335774598300 | 0.99821666710900 | 0.80210807500600 |
| 0.99995439657800 | 0.06418461652820 | 0.08254503079580 |

|                  |                  |                  |
|------------------|------------------|------------------|
| 0.00011414405502 | 0.06420744374650 | 0.41592346269500 |
| 0.00013137172450 | 0.06423284619190 | 0.74922307446600 |
| 0.33350245358000 | 0.06409048342640 | 0.08254894442880 |
| 0.33347723831700 | 0.06420711049130 | 0.41592586723300 |
| 0.33346736556500 | 0.06423461701040 | 0.74922291179000 |
| 0.66679694750900 | 0.06421923647670 | 0.08255426598980 |
| 0.66680146827600 | 0.06422695769570 | 0.41589206281300 |
| 0.66679552792000 | 0.06423479066420 | 0.74922050202100 |
| 0.33324668096000 | 0.06389409394860 | 0.30490496730800 |
| 0.33326453080100 | 0.06391022620310 | 0.63826352527900 |
| 0.33327164742100 | 0.06391574337690 | 0.97157932046700 |
| 0.66659935699600 | 0.06387577080360 | 0.30493235585600 |
| 0.66659959016100 | 0.06390036073750 | 0.63826538840700 |
| 0.66660222130600 | 0.06388928833880 | 0.97159842403600 |
| 0.99991691963800 | 0.06389297111510 | 0.30493540733000 |
| 0.99993853707400 | 0.06390916825320 | 0.63826284602700 |
| 0.99989976070000 | 0.06398325592970 | 0.97155142474500 |
| 0.33320287848100 | 0.06424014231470 | 0.19370623686500 |
| 0.33327742213700 | 0.06429605020850 | 0.52707944154800 |
| 0.33327928613700 | 0.06428833999910 | 0.86041320070700 |
| 0.66659657330400 | 0.06427339282770 | 0.19375017545700 |
| 0.66661345396700 | 0.06429755275840 | 0.52707380090700 |
| 0.66661108354900 | 0.06429113565280 | 0.86040770716400 |
| 0.99986968106000 | 0.06408221504170 | 0.19369063863800 |
| 0.99994825976600 | 0.06429761390930 | 0.52707618944500 |
| 0.99994422136800 | 0.06430256209860 | 0.86041423181900 |
| 0.16661906508300 | 0.06406022442250 | 0.08256325166730 |
| 0.16674394451400 | 0.06025464968440 | 0.41849437562100 |
| 0.16674972803100 | 0.06029014185020 | 0.75183206374900 |
| 0.50008874734300 | 0.06030768917730 | 0.08519298008420 |

|                  |                  |                  |
|------------------|------------------|------------------|
| 0.50009685535800 | 0.06031094558280 | 0.41852243724200 |
| 0.50007900392100 | 0.06031836554750 | 0.75186389952300 |
| 0.83340174625400 | 0.06031584525900 | 0.08519218388930 |
| 0.83340359489800 | 0.06031730323750 | 0.41852803118000 |
| 0.83341224805000 | 0.06031492304190 | 0.75185885084900 |
| 0.16640016170500 | 0.06357678342090 | 0.30501590303300 |
| 0.16639405688100 | 0.06311129578670 | 0.63841788085100 |
| 0.16638657444400 | 0.06339394943230 | 0.97156226598900 |
| 0.49975786007900 | 0.06307293303540 | 0.30509734966500 |
| 0.49972702287700 | 0.06309134381030 | 0.63843657507200 |
| 0.49972431114400 | 0.06307452293040 | 0.97177151402400 |
| 0.83303618417100 | 0.06306305006300 | 0.30510087673800 |
| 0.83305883976400 | 0.06309156393770 | 0.63843375961500 |
| 0.83307637408900 | 0.06309021847820 | 0.97176612244700 |
| 0.16660078870400 | 0.06460874279240 | 0.19401561632800 |
| 0.16604836451400 | 0.06702588421320 | 0.52563244041700 |
| 0.16605498502000 | 0.06703377050300 | 0.85897316588900 |
| 0.49940686036100 | 0.06701652529350 | 0.19227523781600 |
| 0.49940436336800 | 0.06702926758010 | 0.52563613552300 |
| 0.49939034029500 | 0.06702782943590 | 0.85895800897600 |
| 0.83271301578000 | 0.06701749756930 | 0.19230048108100 |
| 0.83272087265400 | 0.06703164299340 | 0.52562970269400 |
| 0.83273302131500 | 0.06702823384290 | 0.85896320969100 |
| 0.08336416156710 | 0.06379903533850 | 0.08282791673780 |
| 0.08392757494240 | 0.06274073801630 | 0.41701951428500 |
| 0.08393379105580 | 0.06271699024620 | 0.75036862885600 |
| 0.41724761511200 | 0.06266764882390 | 0.08370147576050 |
| 0.41727501355700 | 0.06271299686860 | 0.41704267204500 |
| 0.41726036032700 | 0.06273130032480 | 0.75037157139800 |
| 0.75060104819000 | 0.06271140702930 | 0.08369177029090 |

|                  |                  |                  |
|------------------|------------------|------------------|
| 0.75058851685500 | 0.06271856590670 | 0.41703948994000 |
| 0.75059136566400 | 0.06272573039860 | 0.75036855683800 |
| 0.08329511544210 | 0.06387379666170 | 0.30498937909200 |
| 0.08329461234870 | 0.06363538268600 | 0.63811253795900 |
| 0.08323538520780 | 0.06385629907210 | 0.97129474027600 |
| 0.41667066269100 | 0.06359771853290 | 0.30480338595600 |
| 0.41662524497800 | 0.06361892529080 | 0.63812460770300 |
| 0.41663106887800 | 0.06360185440440 | 0.97144993603000 |
| 0.74995887332300 | 0.06359265516610 | 0.30480486927700 |
| 0.74995776641400 | 0.06361770942560 | 0.63812141540700 |
| 0.74996963018800 | 0.06361713749920 | 0.97145382390200 |
| 0.08327459457100 | 0.06394026699900 | 0.19369516750500 |
| 0.08382355741350 | 0.06454391502440 | 0.52637615306500 |
| 0.08380680318650 | 0.06456000803810 | 0.85972431999900 |
| 0.41713207500500 | 0.06449752513670 | 0.19303047567300 |
| 0.41714962447400 | 0.06454597803420 | 0.52640957080600 |
| 0.41714334503100 | 0.06454233821580 | 0.85973690808800 |
| 0.75045485479800 | 0.06454735988370 | 0.19308385782100 |
| 0.75047202216300 | 0.06454812698420 | 0.52640383870000 |
| 0.75047763483600 | 0.06454451607370 | 0.85973604647800 |
| 0.25004993584100 | 0.06411669518700 | 0.08253370964230 |
| 0.24968506807500 | 0.06468343261100 | 0.41554643113700 |
| 0.24969866847100 | 0.06467475906350 | 0.74889041882200 |
| 0.58303013304800 | 0.06466865069900 | 0.08222815724170 |
| 0.58304784270700 | 0.06466726730660 | 0.41556649561200 |
| 0.58303160485000 | 0.06467233487750 | 0.74889877898000 |
| 0.91633180254000 | 0.06464154294090 | 0.08225551394640 |
| 0.91635330493900 | 0.06465451489760 | 0.41557389684300 |
| 0.91636737099900 | 0.06467161638760 | 0.74890233310700 |
| 0.24979568201700 | 0.06383406544370 | 0.30491002164500 |

|                  |                  |                  |
|------------------|------------------|------------------|
| 0.24976348969400 | 0.06350502599750 | 0.63805420680000 |
| 0.24974990312000 | 0.06358700377720 | 0.97132084406300 |
| 0.58310633697400 | 0.06346972909110 | 0.30473558708600 |
| 0.58309889477500 | 0.06348480428270 | 0.63806635589500 |
| 0.58309534649700 | 0.06347310495180 | 0.97140149457700 |
| 0.91639685561800 | 0.06346096135700 | 0.30473512153100 |
| 0.91643287376000 | 0.06348718709040 | 0.63806535568000 |
| 0.91644612003100 | 0.06349620184420 | 0.97139340775100 |
| 0.24972058374600 | 0.06418877553580 | 0.19351534000800 |
| 0.24998309774400 | 0.06409481860940 | 0.52679571356900 |
| 0.24998818891800 | 0.06409093724690 | 0.86013806363300 |
| 0.58333579804500 | 0.06408661042680 | 0.19346929258700 |
| 0.58333626434100 | 0.06409287190900 | 0.52680802110300 |
| 0.58332701042000 | 0.06408967708080 | 0.86013988442600 |
| 0.91662293716400 | 0.06402994129290 | 0.19344703062400 |
| 0.91665705586600 | 0.06409427399240 | 0.52681203758900 |
| 0.91666662970600 | 0.06409408417630 | 0.86014070636600 |
| 0.12500000000200 | 0.13043999660500 | 0.02777666599470 |
| 0.12500000000200 | 0.13043999660500 | 0.36110999932900 |
| 0.12500000000200 | 0.13043999660500 | 0.69444333266100 |
| 0.45833333333600 | 0.13043999660500 | 0.02777666599470 |
| 0.45833333333600 | 0.13043999660500 | 0.36110999932900 |
| 0.45833333333600 | 0.13043999660500 | 0.69444333266100 |
| 0.79166666666800 | 0.13043999660500 | 0.02777666599470 |
| 0.79166666666800 | 0.13043999660500 | 0.36110999932900 |
| 0.79166666666800 | 0.13043999660500 | 0.69444333266100 |
| 0.12500000000200 | 0.13043999660500 | 0.2499999995100  |
| 0.12500000000200 | 0.13043999660500 | 0.5833333328300  |
| 0.12500000000200 | 0.13043999660500 | 0.9166666661500  |
| 0.45833333333600 | 0.13043999660500 | 0.2499999995100  |



|                  |                  |                  |
|------------------|------------------|------------------|
| 0.45833333333600 | 0.13043999660500 | 0.58333333328300 |
| 0.45833333333600 | 0.13043999660500 | 0.91666666661500 |
| 0.79166666666800 | 0.13043999660500 | 0.24999999995100 |
| 0.79166666666800 | 0.13043999660500 | 0.58333333328300 |
| 0.79166666666800 | 0.13043999660500 | 0.91666666661500 |
| 0.12500000000200 | 0.13043999660500 | 0.13888999819000 |
| 0.12500000000200 | 0.13043999660500 | 0.47222333152400 |
| 0.12500000000200 | 0.13043999660500 | 0.80555666485600 |
| 0.45833333333600 | 0.13043999660500 | 0.13888999819000 |
| 0.45833333333600 | 0.13043999660500 | 0.47222333152400 |
| 0.45833333333600 | 0.13043999660500 | 0.80555666485600 |
| 0.79166666666800 | 0.13043999660500 | 0.13888999819000 |
| 0.79166666666800 | 0.13043999660500 | 0.47222333152400 |
| 0.79166666666800 | 0.13043999660500 | 0.80555666485600 |
| 0.29166666669900 | 0.13043999660500 | 0.02777666599470 |
| 0.29166666669900 | 0.13043999660500 | 0.36110999932900 |
| 0.29166666669900 | 0.13043999660500 | 0.69444333266100 |
| 0.62500000003300 | 0.13043999660500 | 0.02777666599470 |
| 0.62500000003300 | 0.13043999660500 | 0.36110999932900 |
| 0.62500000003300 | 0.13043999660500 | 0.69444333266100 |
| 0.95833333336500 | 0.13043999660500 | 0.02777666599470 |
| 0.95833333336500 | 0.13043999660500 | 0.36110999932900 |
| 0.95833333336500 | 0.13043999660500 | 0.69444333266100 |
| 0.29166666669900 | 0.13043999660500 | 0.24999999995100 |
| 0.29166666669900 | 0.13043999660500 | 0.58333333328300 |
| 0.29166666669900 | 0.13043999660500 | 0.91666666661500 |
| 0.62500000003300 | 0.13043999660500 | 0.24999999995100 |
| 0.62500000003300 | 0.13043999660500 | 0.58333333328300 |
| 0.62500000003300 | 0.13043999660500 | 0.91666666661500 |
| 0.95833333336500 | 0.13043999660500 | 0.24999999995100 |

|                  |                  |                  |
|------------------|------------------|------------------|
| 0.95833333336500 | 0.13043999660500 | 0.58333333328300 |
| 0.95833333336500 | 0.13043999660500 | 0.91666666661500 |
| 0.29166666669900 | 0.13043999660500 | 0.13888999819000 |
| 0.29166666669900 | 0.13043999660500 | 0.47222333152400 |
| 0.29166666669900 | 0.13043999660500 | 0.80555666485600 |
| 0.6250000003300  | 0.13043999660500 | 0.13888999819000 |
| 0.6250000003300  | 0.13043999660500 | 0.47222333152400 |
| 0.6250000003300  | 0.13043999660500 | 0.80555666485600 |
| 0.95833333336500 | 0.13043999660500 | 0.13888999819000 |
| 0.95833333336500 | 0.13043999660500 | 0.47222333152400 |
| 0.95833333336500 | 0.13043999660500 | 0.80555666485600 |
| 0.04166666667330 | 0.13043999660500 | 0.02777666599470 |
| 0.04166666667330 | 0.13043999660500 | 0.36110999932900 |
| 0.04166666667330 | 0.13043999660500 | 0.69444333266100 |
| 0.3750000000700  | 0.13043999660500 | 0.02777666599470 |
| 0.3750000000700  | 0.13043999660500 | 0.36110999932900 |
| 0.3750000000700  | 0.13043999660500 | 0.69444333266100 |
| 0.7083333334100  | 0.13043999660500 | 0.02777666599470 |
| 0.7083333334100  | 0.13043999660500 | 0.36110999932900 |
| 0.7083333334100  | 0.13043999660500 | 0.69444333266100 |
| 0.04166666667330 | 0.13043999660500 | 0.2499999995100  |
| 0.04166666667330 | 0.13043999660500 | 0.58333333328300 |
| 0.04166666667330 | 0.13043999660500 | 0.91666666661500 |
| 0.3750000000700  | 0.13043999660500 | 0.2499999995100  |
| 0.3750000000700  | 0.13043999660500 | 0.58333333328300 |
| 0.3750000000700  | 0.13043999660500 | 0.91666666661500 |
| 0.7083333334100  | 0.13043999660500 | 0.2499999995100  |
| 0.7083333334100  | 0.13043999660500 | 0.58333333328300 |
| 0.7083333334100  | 0.13043999660500 | 0.91666666661500 |
| 0.04166666667330 | 0.13043999660500 | 0.13888999819000 |

|                  |                  |                  |
|------------------|------------------|------------------|
| 0.04166666667330 | 0.13043999660500 | 0.47222333152400 |
| 0.04166666667330 | 0.13043999660500 | 0.80555666485600 |
| 0.37500000000700 | 0.13043999660500 | 0.13888999819000 |
| 0.37500000000700 | 0.13043999660500 | 0.47222333152400 |
| 0.37500000000700 | 0.13043999660500 | 0.80555666485600 |
| 0.70833333334100 | 0.13043999660500 | 0.13888999819000 |
| 0.70833333334100 | 0.13043999660500 | 0.47222333152400 |
| 0.70833333334100 | 0.13043999660500 | 0.80555666485600 |
| 0.20833333332800 | 0.13043999660500 | 0.02777666599470 |
| 0.20833333332800 | 0.13043999660500 | 0.36110999932900 |
| 0.20833333332800 | 0.13043999660500 | 0.69444333266100 |
| 0.54166666666100 | 0.13043999660500 | 0.02777666599470 |
| 0.54166666666100 | 0.13043999660500 | 0.36110999932900 |
| 0.54166666666100 | 0.13043999660500 | 0.69444333266100 |
| 0.8749999999500  | 0.13043999660500 | 0.02777666599470 |
| 0.8749999999500  | 0.13043999660500 | 0.36110999932900 |
| 0.8749999999500  | 0.13043999660500 | 0.69444333266100 |
| 0.20833333332800 | 0.13043999660500 | 0.2499999995100  |
| 0.20833333332800 | 0.13043999660500 | 0.5833333328300  |
| 0.20833333332800 | 0.13043999660500 | 0.9166666661500  |
| 0.54166666666100 | 0.13043999660500 | 0.2499999995100  |
| 0.54166666666100 | 0.13043999660500 | 0.5833333328300  |
| 0.54166666666100 | 0.13043999660500 | 0.9166666661500  |
| 0.8749999999500  | 0.13043999660500 | 0.2499999995100  |
| 0.8749999999500  | 0.13043999660500 | 0.5833333328300  |
| 0.8749999999500  | 0.13043999660500 | 0.9166666661500  |
| 0.20833333332800 | 0.13043999660500 | 0.13888999819000 |
| 0.20833333332800 | 0.13043999660500 | 0.47222333152400 |
| 0.20833333332800 | 0.13043999660500 | 0.80555666485600 |
| 0.54166666666100 | 0.13043999660500 | 0.13888999819000 |

|                  |                  |                  |
|------------------|------------------|------------------|
| 0.54166666666100 | 0.13043999660500 | 0.47222333152400 |
| 0.54166666666100 | 0.13043999660500 | 0.80555666485600 |
| 0.87499999999500 | 0.13043999660500 | 0.13888999819000 |
| 0.87499999999500 | 0.13043999660500 | 0.47222333152400 |
| 0.87499999999500 | 0.13043999660500 | 0.80555666485600 |
| 0.99995926500900 | 0.19671165714200 | 0.08254427370270 |
| 0.00011607292054 | 0.19669025366000 | 0.41592073931900 |
| 0.00013401879527 | 0.19666330311800 | 0.74922016667500 |
| 0.33350196244900 | 0.19680941056600 | 0.08255128253960 |
| 0.33347936863600 | 0.19668998845000 | 0.41592260414000 |
| 0.33346921507600 | 0.19666110688100 | 0.74921973219500 |
| 0.66679911603400 | 0.19667693178700 | 0.08255146129640 |
| 0.66680314877200 | 0.19666838372700 | 0.41588915414400 |
| 0.66679770856400 | 0.19666094779700 | 0.74921757276300 |
| 0.33324253762900 | 0.19701728984000 | 0.30491826082500 |
| 0.33326492682500 | 0.19700313012100 | 0.63828025615000 |
| 0.33327265487600 | 0.19699656712700 | 0.97159538860300 |
| 0.66660083855600 | 0.19703703786800 | 0.30494851041100 |
| 0.66660017670800 | 0.19701243851500 | 0.63828177980300 |
| 0.66660297027600 | 0.19702333513400 | 0.97161471222400 |
| 0.99992766182200 | 0.19702170749000 | 0.30494776156000 |
| 0.99993913530100 | 0.19700382707500 | 0.63827926231200 |
| 0.99990055010100 | 0.19692927960800 | 0.97156774136600 |
| 0.33320247377000 | 0.19666618844900 | 0.19371533310500 |
| 0.33328320632000 | 0.19660943537000 | 0.52708874727700 |
| 0.33328506244200 | 0.19661749776100 | 0.86042304781300 |
| 0.66660230092100 | 0.19663167720400 | 0.19375934347000 |
| 0.66661880380700 | 0.19660737285200 | 0.52708317418700 |
| 0.66661652390300 | 0.19661424693100 | 0.86041709169200 |
| 0.99988264814700 | 0.19682485899400 | 0.19370064256100 |

|                  |                  |                  |
|------------------|------------------|------------------|
| 0.99995384964300 | 0.19660785097500 | 0.52708560885600 |
| 0.99995006817400 | 0.19660240507300 | 0.86042309156800 |
| 0.16662042061700 | 0.19684576619200 | 0.08257318240780 |
| 0.16674288687200 | 0.20060238902400 | 0.41846935605900 |
| 0.16674735274300 | 0.20056447989500 | 0.75180804467600 |
| 0.50008681526000 | 0.20054601886000 | 0.08516985288550 |
| 0.50009468848100 | 0.20054240683800 | 0.41849923487700 |
| 0.50007709293800 | 0.20053503180200 | 0.75184064286400 |
| 0.83339964916100 | 0.20053741121200 | 0.08516887960160 |
| 0.83340193601000 | 0.20053610285200 | 0.41850491078900 |
| 0.83341052014600 | 0.20053840014600 | 0.75183548403100 |
| 0.16640945567500 | 0.19732499583400 | 0.30501776156900 |
| 0.16639632579500 | 0.19778469033600 | 0.63843894231700 |
| 0.16638907248700 | 0.19750670129200 | 0.97158423668700 |
| 0.49976006331300 | 0.19782190096300 | 0.30511826144200 |
| 0.49972901455600 | 0.19780350135600 | 0.63845762044100 |
| 0.49972611581500 | 0.19782041453600 | 0.97179259836000 |
| 0.83303892156600 | 0.19783213135300 | 0.30512195712900 |
| 0.83306079067200 | 0.19780322367900 | 0.63845466999300 |
| 0.83307848969600 | 0.19780448801400 | 0.97178703212400 |
| 0.16660794142200 | 0.19640424733200 | 0.19407565136500 |
| 0.16605036755900 | 0.19382934798800 | 0.52563665192700 |
| 0.16605719944900 | 0.19382153612300 | 0.85897771005600 |
| 0.49940892120800 | 0.19383862745200 | 0.19227991350500 |
| 0.49940648269500 | 0.19382594522000 | 0.52564087801300 |
| 0.49939239893600 | 0.19382744847300 | 0.85896272195300 |
| 0.83271551065800 | 0.19383758959300 | 0.19230501347300 |
| 0.83272291613600 | 0.19382371832400 | 0.52563447407100 |
| 0.83273507649900 | 0.19382709042700 | 0.85896800385000 |
| 0.08336604831330 | 0.19710191910600 | 0.08283299734120 |

|                  |                  |                  |
|------------------|------------------|------------------|
| 0.08392837201430 | 0.19815029668600 | 0.41701475656800 |
| 0.08393385802860 | 0.19817248415900 | 0.75036516726400 |
| 0.41724647515800 | 0.19822047871100 | 0.08369894574890 |
| 0.41727463696800 | 0.19817631198000 | 0.41703984498300 |
| 0.41725995119000 | 0.19815627137400 | 0.75036769338700 |
| 0.75060052803300 | 0.19817749218500 | 0.08368865864270 |
| 0.75058847036700 | 0.19816932353100 | 0.41703622426400 |
| 0.75059108265600 | 0.19816240398900 | 0.75036508700900 |
| 0.08331120012070 | 0.19703758840100 | 0.30499369123900 |
| 0.08328674876650 | 0.19726685555200 | 0.63813785152400 |
| 0.08322651120810 | 0.19704506057700 | 0.97131881890600 |
| 0.41666139905900 | 0.19730397841100 | 0.30482827020000 |
| 0.41661704447600 | 0.19728286716600 | 0.63814974474200 |
| 0.41662277796400 | 0.19729964153400 | 0.97147473898100 |
| 0.74995042869200 | 0.19730880063800 | 0.30482945109300 |
| 0.74994956905800 | 0.19728419924600 | 0.63814662115700 |
| 0.74996122644100 | 0.19728457613100 | 0.97147880597300 |
| 0.08329832111520 | 0.19699772263500 | 0.19372377180100 |
| 0.08382734735700 | 0.19637501386700 | 0.52639732938300 |
| 0.08381030488550 | 0.19635899952300 | 0.85974575595400 |
| 0.41713320853500 | 0.19642109718200 | 0.19305176296700 |
| 0.41715308142700 | 0.19637177665200 | 0.52643093595900 |
| 0.41714680121700 | 0.19637508928300 | 0.85975822764900 |
| 0.75045759202700 | 0.19637025419800 | 0.19310520420900 |
| 0.75047515135300 | 0.19636967759900 | 0.52642548755900 |
| 0.75048078500700 | 0.19637317441100 | 0.85975743215700 |
| 0.25005413738800 | 0.19678846030900 | 0.08254223089180 |
| 0.24969504688100 | 0.19620498889500 | 0.41553957037900 |
| 0.24970894515700 | 0.19621080794600 | 0.74888484052100 |
| 0.58304035123500 | 0.19621715990000 | 0.08222307080180 |

|                  |                  |                  |
|------------------|------------------|------------------|
| 0.58305746966500 | 0.19621757276500 | 0.41556094260400 |
| 0.58304178269800 | 0.19621262128700 | 0.74889334137000 |
| 0.91634158547900 | 0.19624229070100 | 0.08225015148830 |
| 0.91636313098100 | 0.19623147575900 | 0.41556876862500 |
| 0.91637778971100 | 0.19621357660700 | 0.74889694028900 |
| 0.24979636749500 | 0.19707224563200 | 0.30491557907900 |
| 0.24977805760800 | 0.19740256556400 | 0.63807496160500 |
| 0.24976454000600 | 0.19732016505000 | 0.97134136373100 |
| 0.58312079046400 | 0.19743723814900 | 0.30475604541800 |
| 0.58311307255400 | 0.19742245105600 | 0.63808703057400 |
| 0.58310948423300 | 0.19743401855300 | 0.97142207520800 |
| 0.91641381997600 | 0.19744587253500 | 0.30475494732700 |
| 0.91644709156300 | 0.19742014493700 | 0.63808602136500 |
| 0.91646019950800 | 0.19741066547100 | 0.97141393076000 |
| 0.24971625794900 | 0.19673600945300 | 0.19353721643900 |
| 0.24999641873100 | 0.19679970811400 | 0.52679962119800 |
| 0.25000118883600 | 0.19680359249200 | 0.86014213142200 |
| 0.58334841827800 | 0.19680749635600 | 0.19347326306600 |
| 0.58334916923800 | 0.19680084910100 | 0.52681195359400 |
| 0.58333986551900 | 0.19680422429100 | 0.86014366796200 |
| 0.91663754775800 | 0.19686517600800 | 0.19345208573500 |
| 0.91666977975000 | 0.19679951316200 | 0.52681597931000 |
| 0.91667942008400 | 0.19679981973400 | 0.86014452312400 |
| 0.12481280064700 | 0.27142838853800 | 0.03116564703410 |
| 0.12500276298500 | 0.27103488462000 | 0.36514501166100 |
| 0.12490899903400 | 0.27114322072200 | 0.69852282057000 |
| 0.45822457126600 | 0.27118103192600 | 0.03188087629830 |
| 0.45822492743200 | 0.27114769858100 | 0.36521709934000 |
| 0.45823270582000 | 0.27114832966800 | 0.69855815962100 |
| 0.79156810450000 | 0.27117700184200 | 0.03186906949100 |

|                  |                  |                  |
|------------------|------------------|------------------|
| 0.79156449314300 | 0.27116141351800 | 0.36522492913500 |
| 0.79156308827200 | 0.27114889886900 | 0.69854996128400 |
| 0.12463404926800 | 0.26890191767600 | 0.25224870847900 |
| 0.12411072901400 | 0.26831080674900 | 0.58399114616000 |
| 0.12410317167600 | 0.26834413419300 | 0.91731097079400 |
| 0.45745869958800 | 0.26826873943600 | 0.25063178758500 |
| 0.45745042612700 | 0.26830392287200 | 0.58400088432800 |
| 0.45745410113900 | 0.26830959305700 | 0.91732175836600 |
| 0.79077453914800 | 0.26830581302200 | 0.25065597837100 |
| 0.79078004015300 | 0.26830167268400 | 0.58399375585500 |
| 0.79078134300800 | 0.26830297121100 | 0.91732727032100 |
| 0.12553528739900 | 0.27105779589200 | 0.14225783388100 |
| 0.12552410361600 | 0.27289888638700 | 0.47483632877800 |
| 0.12556252956400 | 0.27284150062100 | 0.80820689206400 |
| 0.45868946026000 | 0.27274699447300 | 0.14143623861400 |
| 0.45890217658400 | 0.27278205233900 | 0.47485746891500 |
| 0.45889409053100 | 0.27277139194700 | 0.80817127378200 |
| 0.79223837629500 | 0.27274832710900 | 0.14152644597200 |
| 0.79223826473000 | 0.27276048602000 | 0.47484337139900 |
| 0.79222844333400 | 0.27277960097200 | 0.80818169218800 |
| 0.29171540253000 | 0.27139487359700 | 0.03106280195690 |
| 0.29161311658200 | 0.27114514010900 | 0.36453784563600 |
| 0.29165207851300 | 0.27118953619200 | 0.69783022512800 |
| 0.62498690346300 | 0.27121089877000 | 0.03115951495070 |
| 0.62499361326200 | 0.27121221435000 | 0.36449268746300 |
| 0.62498811070200 | 0.27120828328100 | 0.69783100640400 |
| 0.95828080897100 | 0.27132515028500 | 0.03113788971730 |
| 0.95836513414900 | 0.27113770767300 | 0.36447754507000 |
| 0.95832198480200 | 0.27120738895200 | 0.69783314332300 |
| 0.29123674910600 | 0.27125005765200 | 0.25324163051100 |



|                  |                  |                  |
|------------------|------------------|------------------|
| 0.29141605355300 | 0.27170143067800 | 0.58679915820500 |
| 0.29141764454300 | 0.27169894839400 | 0.92014655889400 |
| 0.62475000128500 | 0.27169631939300 | 0.25346222618900 |
| 0.62475286252100 | 0.27170004239800 | 0.58679905124000 |
| 0.62474926014600 | 0.27169514230300 | 0.92013106665100 |
| 0.95815010414000 | 0.27161436009300 | 0.25341773201800 |
| 0.95808354936300 | 0.27169991563400 | 0.58680429554000 |
| 0.95807854260100 | 0.27174595860400 | 0.92012833236500 |
| 0.29131905495000 | 0.27126346125300 | 0.14216097407800 |
| 0.29283087560100 | 0.27216516800400 | 0.47590787979600 |
| 0.29284197601500 | 0.27215022206500 | 0.80923336298200 |
| 0.62617617675100 | 0.27220145843200 | 0.14254711181200 |
| 0.62618975483500 | 0.27219932479700 | 0.47589573125300 |
| 0.62618440198100 | 0.27218546238000 | 0.80922697400500 |
| 0.95982321246400 | 0.27229040866900 | 0.14245467935300 |
| 0.95950622977700 | 0.27219059440200 | 0.47592724176700 |
| 0.95952166145100 | 0.27220277838800 | 0.80922930078400 |
| 0.04165805404110 | 0.27139477050900 | 0.03107957226210 |
| 0.04177667104260 | 0.27121680725300 | 0.36468923449600 |
| 0.04174473493720 | 0.27120255250600 | 0.69797363051900 |
| 0.37508738074400 | 0.27130284304200 | 0.03127017765830 |
| 0.37502177214100 | 0.27113815051500 | 0.36463071398800 |
| 0.37507171709700 | 0.27122035097300 | 0.69797749148900 |
| 0.70840752413900 | 0.27120401461700 | 0.03130218253280 |
| 0.70840061131200 | 0.27123116529100 | 0.36464123319400 |
| 0.70840178982200 | 0.27121860651600 | 0.69797392361100 |
| 0.04103706313990 | 0.27150517856300 | 0.25342019926500 |
| 0.04078984850840 | 0.27173784736900 | 0.58669674316800 |
| 0.04077898493810 | 0.27176514904000 | 0.92003762667100 |
| 0.37409673634700 | 0.27159955608500 | 0.25332517644600 |

|                  |                  |                  |
|------------------|------------------|------------------|
| 0.37412009765600 | 0.27174023950100 | 0.58670924086000 |
| 0.37412793315100 | 0.27175995453500 | 0.92003336669100 |
| 0.70745173220200 | 0.27172294537900 | 0.25337173121100 |
| 0.70744964842400 | 0.27173934535300 | 0.58670229856700 |
| 0.70745080343300 | 0.27172988310500 | 0.92003510190000 |
| 0.04205164076100 | 0.27156146243600 | 0.14241909385500 |
| 0.04090292099560 | 0.27207755182500 | 0.47632081935600 |
| 0.04091007035850 | 0.27204117364800 | 0.80965062232700 |
| 0.37364094229300 | 0.27191909124700 | 0.14283527363700 |
| 0.37424127601800 | 0.27206261811400 | 0.47634277996600 |
| 0.37423131713700 | 0.27207957221000 | 0.80963705404700 |
| 0.70758058550700 | 0.27198967314800 | 0.14299024400100 |
| 0.70756424336600 | 0.27207690562400 | 0.47630451689200 |
| 0.70756284402100 | 0.27205928033500 | 0.80964022483400 |
| 0.20838986671200 | 0.27145286429100 | 0.03118670542960 |
| 0.20829226562400 | 0.27141795617700 | 0.36476311184400 |
| 0.20838156877600 | 0.27156505388200 | 0.69819675234300 |
| 0.54171288950300 | 0.27158662049100 | 0.03156214974530 |
| 0.54171881608300 | 0.27157558082100 | 0.36488792606500 |
| 0.54171604305500 | 0.27157146725700 | 0.69822859082600 |
| 0.87504315807200 | 0.27158445809500 | 0.03157038207670 |
| 0.87505853205300 | 0.27156291328400 | 0.36488398706900 |
| 0.87504902324400 | 0.27156917018100 | 0.69822600001500 |
| 0.20744574192500 | 0.26930023646600 | 0.25199294084400 |
| 0.20667669942500 | 0.26875810601600 | 0.58349831175800 |
| 0.20666414103900 | 0.26877251576500 | 0.91682456415900 |
| 0.54003529033900 | 0.26875331346700 | 0.25014089662400 |
| 0.54001568801100 | 0.26875391672000 | 0.58349839221100 |
| 0.54001497748000 | 0.26875612259700 | 0.91682524321500 |
| 0.87335344527400 | 0.26872946871700 | 0.25013901589900 |

|                  |                  |                  |
|------------------|------------------|------------------|
| 0.87334382030100 | 0.26875339458200 | 0.58349965049900 |
| 0.87334524251300 | 0.26876078530300 | 0.91683367618100 |
| 0.20844791981700 | 0.27135437497200 | 0.14202807195000 |
| 0.20670993032900 | 0.26259430208100 | 0.46876987500600 |
| 0.20670993032900 | 0.26259430208100 | 0.80210320834000 |
| 0.54004326366200 | 0.26259430208100 | 0.13543654167400 |
| 0.54004326366200 | 0.26259430208100 | 0.46876987500600 |
| 0.54004326366200 | 0.26259430208100 | 0.80210320834000 |
| 0.87337659699600 | 0.26259430208100 | 0.13543654167400 |
| 0.87337659699600 | 0.26259430208100 | 0.46876987500600 |
| 0.87337659699600 | 0.26259430208100 | 0.80210320834000 |
| 0.19362069158100 | 0.38266050839600 | 0.22696497255300 |
| 0.19087017234200 | 0.38018768325100 | 0.56058946305000 |
| 0.19087017234200 | 0.38018768325100 | 0.89392279638400 |
| 0.52420350567400 | 0.38018768325100 | 0.22725612971600 |
| 0.52420350567400 | 0.38018768325100 | 0.56058946305000 |
| 0.52420350567400 | 0.38018768325100 | 0.89392279638400 |
| 0.85753683900800 | 0.38018768325100 | 0.22725612971600 |
| 0.85753683900800 | 0.38018768325100 | 0.56058946305000 |
| 0.85753683900800 | 0.38018768325100 | 0.89392279638400 |
| 0.20769544872000 | 0.37749535043400 | 0.16367426469600 |
| 0.21466340067200 | 0.29899202573000 | 0.48850007111500 |
| 0.21465230461000 | 0.29902699619200 | 0.82180955450200 |
| 0.54803914780500 | 0.29900723862600 | 0.15513246073900 |
| 0.54803286088600 | 0.29900271089300 | 0.48847579099500 |
| 0.54802005221300 | 0.29901538829800 | 0.82180306330900 |
| 0.88133234270100 | 0.29899402868800 | 0.15516028487200 |
| 0.88132811103100 | 0.29903758925000 | 0.48846316016100 |
| 0.88134857170600 | 0.29901112365400 | 0.82180939969000 |
| 0.22618121537900 | 0.34478513415700 | 0.24347254218300 |

|                  |                  |                  |
|------------------|------------------|------------------|
| 0.22381293110400 | 0.34145035056000 | 0.57139923977900 |
| 0.22383361298500 | 0.34147183163300 | 0.90473313194700 |
| 0.55712446684200 | 0.34145484991800 | 0.23808003313900 |
| 0.55712912890500 | 0.34143728383300 | 0.57139245982400 |
| 0.55712139109400 | 0.34144292140100 | 0.90472629730600 |
| 0.89046283076800 | 0.34147899929700 | 0.23808833135800 |
| 0.89046473438600 | 0.34144346057700 | 0.57139480449600 |
| 0.89046619086500 | 0.34143982617900 | 0.90471930774600 |
| 0.16645299382700 | 0.37370697544800 | 0.24320524543500 |
| 0.16463856006300 | 0.36495582081400 | 0.58201512539900 |
| 0.16463856006300 | 0.36495582081400 | 0.91534845873100 |
| 0.49797189339700 | 0.36495582081400 | 0.24868179206500 |
| 0.49797189339700 | 0.36495582081400 | 0.58201512539900 |
| 0.49797189339700 | 0.36495582081400 | 0.91534845873100 |
| 0.83130522673100 | 0.36495582081400 | 0.24868179206500 |
| 0.83130522673100 | 0.36495582081400 | 0.58201512539900 |
| 0.83130522673100 | 0.36495582081400 | 0.91534845873100 |
| 0.16889416880400 | 0.34542804568100 | 0.21258432060700 |
| 0.16384550961300 | 0.35793150317700 | 0.54784685551400 |
| 0.16384550961300 | 0.35793150317700 | 0.88118018884800 |
| 0.49717884294500 | 0.35793150317700 | 0.21451352218200 |
| 0.49717884294500 | 0.35793150317700 | 0.54784685551400 |
| 0.49717884294500 | 0.35793150317700 | 0.88118018884800 |
| 0.83051217627900 | 0.35793150317700 | 0.21451352218200 |
| 0.83051217627900 | 0.35793150317700 | 0.54784685551400 |
| 0.83051217627900 | 0.35793150317700 | 0.88118018884800 |
| 0.17651509324100 | 0.33446360919700 | 0.27512107315200 |
| 0.17778220047600 | 0.32683855195200 | 0.60516562000400 |
| 0.17779438547000 | 0.32682199719700 | 0.93847822351800 |
| 0.51109590902400 | 0.32688599333800 | 0.27187209623900 |

|                  |                  |                  |
|------------------|------------------|------------------|
| 0.51111256578600 | 0.32685619198800 | 0.60517779628500 |
| 0.51110981276200 | 0.32686624090300 | 0.93852079329300 |
| 0.84444499922500 | 0.32686597465300 | 0.27185458498600 |
| 0.84444652021500 | 0.32684609113700 | 0.60517042557300 |
| 0.84444021851200 | 0.32686332398600 | 0.93851839095400 |
| 0.14502356905800 | 0.33503809197700 | 0.27126873389500 |
| 0.14556624368300 | 0.32646558270800 | 0.60199643703000 |
| 0.14557504939900 | 0.32646071038100 | 0.93533177547500 |
| 0.47888556192100 | 0.32644447088700 | 0.26863552968400 |
| 0.47889799977100 | 0.32646335570200 | 0.60199230063500 |
| 0.47889406716000 | 0.32648752411200 | 0.93533668294100 |
| 0.81222659224100 | 0.32648348581600 | 0.26866877668100 |
| 0.81223062728400 | 0.32646708526000 | 0.60199389987400 |
| 0.81222632717800 | 0.32647008310000 | 0.93532527560700 |
| 0.23569234110900 | 0.39360119188200 | 0.24772971544600 |
| 0.23503928880800 | 0.39041987647500 | 0.57078199904000 |
| 0.23503303004700 | 0.39045077717300 | 0.90411669762500 |
| 0.56833923811100 | 0.39042681642300 | 0.23750467919300 |
| 0.56836073916900 | 0.39040143152000 | 0.57081531376500 |
| 0.56834950078800 | 0.39040886570900 | 0.90415878225400 |
| 0.90169676413000 | 0.39044050578500 | 0.23745112231300 |
| 0.90170124014700 | 0.39040490422400 | 0.57079652224100 |
| 0.90168678441000 | 0.39040984089500 | 0.90415244544300 |
| 0.15493748768300 | 0.30986659597000 | 0.18720691233600 |
| 0.14624648266800 | 0.29843742519300 | 0.51539653296100 |
| 0.14624690663900 | 0.29841554805800 | 0.84872915484300 |
| 0.47955800252400 | 0.29842588995800 | 0.18206292639400 |
| 0.47958050751100 | 0.29841075776600 | 0.51539411670200 |
| 0.47958095266600 | 0.29841193921100 | 0.84873304952600 |
| 0.81291562180000 | 0.29842236029000 | 0.18206875434300 |

|                  |                  |                  |
|------------------|------------------|------------------|
| 0.81291245277500 | 0.29840300274900 | 0.51540226000600 |
| 0.81290969629700 | 0.29840753156200 | 0.84873178249100 |
| 0.20517770117400 | 0.40123779131200 | 0.16724330881600 |
| 0.17834467602700 | 0.30211795276000 | 0.51696870799500 |
| 0.17834370384600 | 0.30210980455200 | 0.85031245760800 |
| 0.51166073798900 | 0.30211935697100 | 0.18361734650300 |
| 0.51167568932500 | 0.30211416461100 | 0.51697824068600 |
| 0.51167784330500 | 0.30211157454200 | 0.85029859739300 |
| 0.84501322265600 | 0.30213830291300 | 0.18365727332400 |
| 0.84500881979800 | 0.30210689887800 | 0.51697237882700 |
| 0.84500587204100 | 0.30210928213200 | 0.85030595833900 |
| 0.19342258589600 | 0.87850160394000 | 0.22700568960100 |
| 0.19117110371900 | 0.88035195697000 | 0.55992095759000 |
| 0.19117110371900 | 0.88035195697000 | 0.89325429092400 |
| 0.52450443705100 | 0.88035195697000 | 0.22658762425800 |
| 0.52450443705100 | 0.88035195697000 | 0.55992095759000 |
| 0.52450443705100 | 0.88035195697000 | 0.89325429092400 |
| 0.85783777038500 | 0.88035195697000 | 0.22658762425800 |
| 0.85783777038500 | 0.88035195697000 | 0.55992095759000 |
| 0.85783777038500 | 0.88035195697000 | 0.89325429092400 |
| 0.20774917303700 | 0.88357559093800 | 0.16395341053000 |
| 0.21469970099000 | 0.96186524943900 | 0.48851913888900 |
| 0.21468857100000 | 0.96183060109500 | 0.82182894339300 |
| 0.54807536332600 | 0.96185026034700 | 0.15515161832800 |
| 0.54806870580800 | 0.96185467532700 | 0.48849502992200 |
| 0.54805589275800 | 0.96184197702600 | 0.82182234756700 |
| 0.88136733520400 | 0.96186305341200 | 0.15517978121100 |
| 0.88136431343300 | 0.96181987972500 | 0.48848243113400 |
| 0.88138448670500 | 0.96184624141400 | 0.82182864391500 |
| 0.22611039497600 | 0.91627892254500 | 0.24343128499000 |

|                  |                  |                  |
|------------------|------------------|------------------|
| 0.22388914234300 | 0.91939320405900 | 0.57141530006100 |
| 0.22390992899100 | 0.91937228854100 | 0.90474898778700 |
| 0.55720262401700 | 0.91938848573900 | 0.23809633113900 |
| 0.55720602161400 | 0.91940611713700 | 0.57140854399200 |
| 0.55719826688500 | 0.91940072294000 | 0.90474245911500 |
| 0.89053887788400 | 0.91936491858800 | 0.23810447750600 |
| 0.89054111021200 | 0.91940002974300 | 0.57141087341400 |
| 0.89054318078700 | 0.91940403091100 | 0.90473542651400 |
| 0.16644975179000 | 0.88797712957400 | 0.24340503494900 |
| 0.16465016269500 | 0.89541870945100 | 0.58102806595300 |
| 0.16465016269500 | 0.89541870945100 | 0.91436139928700 |
| 0.49798349602900 | 0.89541870945100 | 0.24769473262100 |
| 0.49798349602900 | 0.89541870945100 | 0.58102806595300 |
| 0.49798349602900 | 0.89541870945100 | 0.91436139928700 |
| 0.83131682936300 | 0.89541870945100 | 0.24769473262100 |
| 0.83131682936300 | 0.89541870945100 | 0.58102806595300 |
| 0.83131682936300 | 0.89541870945100 | 0.91436139928700 |
| 0.16871211973400 | 0.91572383657900 | 0.21263380168400 |
| 0.16428441036100 | 0.90249161381900 | 0.54687517250000 |
| 0.16428441036100 | 0.90249161381900 | 0.88020850583200 |
| 0.49761774369300 | 0.90249161381900 | 0.21354183916600 |
| 0.49761774369300 | 0.90249161381900 | 0.54687517250000 |
| 0.49761774369300 | 0.90249161381900 | 0.88020850583200 |
| 0.83095107702700 | 0.90249161381900 | 0.21354183916600 |
| 0.83095107702700 | 0.90249161381900 | 0.54687517250000 |
| 0.83095107702700 | 0.90249161381900 | 0.88020850583200 |
| 0.17690308501100 | 0.92799014817800 | 0.27481908667400 |
| 0.17752740924400 | 0.93305371628700 | 0.60454976971100 |
| 0.17753834029900 | 0.93306739588000 | 0.93786448867700 |
| 0.51084415141700 | 0.93301245299100 | 0.27124913166300 |

|                  |                  |                  |
|------------------|------------------|------------------|
| 0.51085842142600 | 0.93303940530500 | 0.60455820061100 |
| 0.51085543945000 | 0.93302928334800 | 0.93790106536900 |
| 0.84419131792000 | 0.93302944376600 | 0.27123474454000 |
| 0.84419223929900 | 0.93304965113000 | 0.60455078122200 |
| 0.84418701621700 | 0.93303323424800 | 0.93789774472300 |
| 0.14532975991900 | 0.92708598872400 | 0.27141481317800 |
| 0.14535154739100 | 0.93361755364500 | 0.60111964824100 |
| 0.14535914545700 | 0.93361963111300 | 0.93445675498700 |
| 0.47867315883700 | 0.93364369030000 | 0.26775457261900 |
| 0.47868348856600 | 0.93362374609700 | 0.60111180752200 |
| 0.47867968290100 | 0.93360000719300 | 0.93445493898400 |
| 0.81201301065600 | 0.93360385112200 | 0.26778793629400 |
| 0.81201592517900 | 0.93362045174600 | 0.60111295342500 |
| 0.81201260613900 | 0.93361772511100 | 0.93444425764800 |
| 0.23558117220400 | 0.86746480009400 | 0.24772224596800 |
| 0.23529089213000 | 0.87052904749900 | 0.57084370889400 |
| 0.23528490597500 | 0.87049832612000 | 0.90417795190600 |
| 0.56859186146900 | 0.87052167315600 | 0.23756785113900 |
| 0.56861251184800 | 0.87054732794400 | 0.57087720704000 |
| 0.56860110983300 | 0.87054002905600 | 0.90422050497100 |
| 0.90194876535700 | 0.87050914739400 | 0.23751174406800 |
| 0.90195286144500 | 0.87054408383800 | 0.57085796550800 |
| 0.90193837564800 | 0.87053901361900 | 0.90421435603800 |
| 0.15481891473100 | 0.95125361428000 | 0.18717284808200 |
| 0.14631601578400 | 0.96229899732900 | 0.51528226411000 |
| 0.14631623863800 | 0.96232040073100 | 0.84861453422400 |
| 0.47962747820000 | 0.96231053102200 | 0.18194921680500 |
| 0.47965010607400 | 0.96232536757900 | 0.51528004528100 |
| 0.47965079760300 | 0.96232414719200 | 0.84861936003800 |
| 0.81298521258400 | 0.96231383469900 | 0.18195486567100 |



|                  |                  |                  |
|------------------|------------------|------------------|
| 0.81298215920300 | 0.96233267870200 | 0.51528820567600 |
| 0.81297938518500 | 0.96232853571200 | 0.84861783199700 |
| 0.20536282776600 | 0.85976842557100 | 0.16746978303000 |
| 0.17842604102400 | 0.95903636526600 | 0.51676671631600 |
| 0.17842483405600 | 0.95904488332600 | 0.85011032121900 |
| 0.51174183917200 | 0.95903648254500 | 0.18341592611200 |
| 0.51175719496100 | 0.95904081217400 | 0.51677651262800 |
| 0.51175945391300 | 0.95904345652100 | 0.85009727157700 |
| 0.84509465958000 | 0.95901773862700 | 0.18345582922200 |
| 0.84509033151700 | 0.95904780418200 | 0.51677070563400 |
| 0.84508739792700 | 0.95904557546300 | 0.85010437268200 |
| 0.22634953290300 | 0.37438962886700 | 0.23536906891700 |
| 0.22205496527900 | 0.37039266169700 | 0.56240873064500 |
| 0.22205713897700 | 0.37040663748900 | 0.89574246578900 |
| 0.55540719538600 | 0.37038943599400 | 0.22906901605100 |
| 0.55539382987300 | 0.37039088743300 | 0.56240805635300 |
| 0.55539262571900 | 0.37039447590300 | 0.89573801463000 |
| 0.88871970595200 | 0.37039915191800 | 0.22907338584100 |
| 0.88872202985200 | 0.37039043380100 | 0.56240681063000 |
| 0.88872717863400 | 0.37039559472300 | 0.89573826453300 |
| 0.17305933240300 | 0.37990486936700 | 0.22480516821100 |
| 0.16959425188500 | 0.37982610799400 | 0.56111634042600 |
| 0.16959425188500 | 0.37982610799400 | 0.89444967375900 |
| 0.50292758521800 | 0.37982610799400 | 0.22778300709300 |
| 0.50292758521800 | 0.37982610799400 | 0.56111634042600 |
| 0.50292758521800 | 0.37982610799400 | 0.89444967375900 |
| 0.83626091855100 | 0.37982610799400 | 0.22778300709300 |
| 0.83626091855100 | 0.37982610799400 | 0.56111634042600 |
| 0.83626091855100 | 0.37982610799400 | 0.89444967375900 |
| 0.16110693071000 | 0.35515923850900 | 0.27263713758100 |

|                  |                  |                  |
|------------------|------------------|------------------|
| 0.16180149411500 | 0.34750365901200 | 0.60388447012800 |
| 0.16181192649000 | 0.34749439380100 | 0.93721965170300 |
| 0.49511227395600 | 0.34751709081100 | 0.27054339802100 |
| 0.49513013854200 | 0.34751147101200 | 0.60388246025700 |
| 0.49513094990600 | 0.34752734026700 | 0.93721592796300 |
| 0.82846317543600 | 0.34752537818000 | 0.27054883092300 |
| 0.82846494526500 | 0.34750895365300 | 0.60388077706800 |
| 0.82845838640500 | 0.34751745459200 | 0.93721486751100 |
| 0.16578252053500 | 0.30989612061400 | 0.20323634264600 |
| 0.16194004345300 | 0.30427985056300 | 0.52823700469300 |
| 0.16193823860200 | 0.30427652175200 | 0.86157626784700 |
| 0.49526301075800 | 0.30428148200300 | 0.19488780837600 |
| 0.49526789848800 | 0.30428063124900 | 0.52824146911800 |
| 0.49527537168300 | 0.30428352445600 | 0.86156713228600 |
| 0.82859932320200 | 0.30429049901900 | 0.19491181838300 |
| 0.82860501814500 | 0.30427825612600 | 0.52823988477300 |
| 0.82860122665900 | 0.30428146638000 | 0.86157225976600 |
| 0.22626249308800 | 0.88666505386400 | 0.23533974602500 |
| 0.22232436349800 | 0.89046731656800 | 0.56237351674400 |
| 0.22232648907600 | 0.89045360405100 | 0.89570724204400 |
| 0.55567944883000 | 0.89047084863700 | 0.22903424501700 |
| 0.55566403765100 | 0.89046921926300 | 0.56237289908300 |
| 0.55566278619500 | 0.89046607515700 | 0.89570290187600 |
| 0.88898911219300 | 0.89046206148500 | 0.22903795418500 |
| 0.88899159558000 | 0.89046978435700 | 0.56237155559800 |
| 0.88899732461100 | 0.89046485498300 | 0.89570321057800 |
| 0.17285677673700 | 0.88139598652600 | 0.22497603599500 |
| 0.16990748858400 | 0.88049640230400 | 0.56015040302700 |
| 0.16990748858400 | 0.88049640230400 | 0.89348373636100 |
| 0.50324082191800 | 0.88049640230400 | 0.22681706969300 |

|                  |                  |                  |
|------------------|------------------|------------------|
| 0.50324082191800 | 0.88049640230400 | 0.56015040302700 |
| 0.50324082191800 | 0.88049640230400 | 0.89348373636100 |
| 0.83657415525200 | 0.88049640230400 | 0.22681706969300 |
| 0.83657415525200 | 0.88049640230400 | 0.56015040302700 |
| 0.83657415525200 | 0.88049640230400 | 0.89348373636100 |
| 0.16149536884000 | 0.90712456519900 | 0.27272488617500 |
| 0.16155490589800 | 0.91246004388800 | 0.60291294907000 |
| 0.16156360324800 | 0.91246676444100 | 0.93624879591100 |
| 0.49486923578400 | 0.91245340241200 | 0.26956537028900 |
| 0.49488399984400 | 0.91245616347900 | 0.60290784894400 |
| 0.49488466233700 | 0.91244098830300 | 0.93624155919100 |
| 0.82821766103400 | 0.91244327944400 | 0.26957430320400 |
| 0.82821857398700 | 0.91245913555500 | 0.60290585741600 |
| 0.82821329532800 | 0.91245143862600 | 0.93623952232600 |
| 0.16573184941400 | 0.95122215701300 | 0.20316288727400 |
| 0.16206466305700 | 0.95646382852100 | 0.52806878010800 |
| 0.16206249326700 | 0.95646695579200 | 0.86140767624300 |
| 0.49538715060300 | 0.95646342092000 | 0.19471995424700 |
| 0.49539254667000 | 0.95646317509000 | 0.52807328443000 |
| 0.49540017423300 | 0.95646073916100 | 0.86139931702300 |
| 0.82872360877900 | 0.95645373082600 | 0.19474367250000 |
| 0.82872968435900 | 0.95646553552700 | 0.52807164450000 |
| 0.82872593799300 | 0.95646259742300 | 0.86140421767300 |

**7) Large supercell 2-H<sup>+</sup><sub>sol</sub> IS**

POSCAR

1

|                   |                   |                   |
|-------------------|-------------------|-------------------|
| 48.68518359261381 | 0.00000000000000  | 0.00000000000000  |
| 0.00000000000000  | 30.38812200000589 | 0.00000000000000  |
| 0.00000000000000  | 0.00000000000000  | 51.63843519240750 |

Al As H O  
540 540 342 144

Direct

|                  |                  |                  |
|------------------|------------------|------------------|
| 0.00014474078801 | 0.01561589211790 | 0.00995256558136 |
| 0.00014474274410 | 0.01561502246980 | 0.34328423010900 |
| 0.00014476548839 | 0.01561438176990 | 0.67661832095400 |
| 0.33347817014600 | 0.01561606444530 | 0.00995261007590 |
| 0.33347817060900 | 0.01561519868520 | 0.34328427680200 |
| 0.33347818556900 | 0.01561453348270 | 0.67661835313600 |
| 0.66681125167300 | 0.01561601071390 | 0.00995259211867 |
| 0.66681124750700 | 0.01561513612790 | 0.34328425402700 |
| 0.66681127863200 | 0.01561447924270 | 0.67661833841800 |
| 0.33275508446300 | 0.00738408312263 | 0.22361276297300 |
| 0.33275515539500 | 0.00738282496669 | 0.55694633408400 |
| 0.33275517074700 | 0.00738340370956 | 0.89028045034100 |
| 0.66608818615500 | 0.00738404756486 | 0.22361276029500 |
| 0.66608825650200 | 0.00738278504131 | 0.55694633606100 |
| 0.66608828233700 | 0.00738337124288 | 0.89028045124000 |
| 0.99942166550800 | 0.00738393353900 | 0.22361276064000 |
| 0.99942174049100 | 0.00738267461368 | 0.55694633902200 |
| 0.99942175541600 | 0.00738325929440 | 0.89028044444800 |
| 0.00038400458152 | 0.01546002229670 | 0.11976550916500 |
| 0.00038406758651 | 0.01545787409030 | 0.45309800457500 |
| 0.00038403801725 | 0.01545823493140 | 0.78643222490300 |
| 0.33371742670300 | 0.01546021633300 | 0.11976552500500 |
| 0.33371748668900 | 0.01545807478570 | 0.45309801880600 |
| 0.33371745176000 | 0.01545840521890 | 0.78643223896700 |
| 0.66705052391200 | 0.01546015957330 | 0.11976552131400 |
| 0.66705057927300 | 0.01545800746060 | 0.45309801542200 |
| 0.66705056389900 | 0.01545835122000 | 0.78643223837800 |

|                  |                  |                  |
|------------------|------------------|------------------|
| 0.16669989217500 | 0.01481007199890 | 0.01007771365240 |
| 0.16669990233600 | 0.01480951278390 | 0.34340935606600 |
| 0.16669987791200 | 0.01480879020390 | 0.67674329735400 |
| 0.50003315513000 | 0.01481033233770 | 0.01007779116890 |
| 0.50003316152200 | 0.01480977542720 | 0.34340943217700 |
| 0.50003314063900 | 0.01480901581810 | 0.67674336643400 |
| 0.83336646095500 | 0.01481003192070 | 0.01007770797970 |
| 0.83336647059500 | 0.01480946742230 | 0.34340934293900 |
| 0.83336645042100 | 0.01480874587860 | 0.67674329133800 |
| 0.16479663788600 | 0.00760514890160 | 0.22317501397800 |
| 0.16479657302400 | 0.00760404650840 | 0.55650859419400 |
| 0.16479657140600 | 0.00760457698226 | 0.88984277215600 |
| 0.49812990292100 | 0.00760533543499 | 0.22317503772900 |
| 0.49812983539400 | 0.00760423111498 | 0.55650861018900 |
| 0.49812983686000 | 0.00760475554652 | 0.88984279894900 |
| 0.83146320070500 | 0.00760511825520 | 0.22317500865200 |
| 0.83146313658600 | 0.00760400963610 | 0.55650859358400 |
| 0.83146313540000 | 0.00760454766957 | 0.88984277165600 |
| 0.16220170249300 | 0.97934177204300 | 0.10431161015800 |
| 0.16220160720300 | 0.97934161311500 | 0.43764454801200 |
| 0.16220159488700 | 0.97934203926900 | 0.77097913346700 |
| 0.49553492999600 | 0.97934184404000 | 0.10431151760900 |
| 0.49553482931800 | 0.97934168899500 | 0.43764445411100 |
| 0.49553482366400 | 0.97934208995800 | 0.77097904585500 |
| 0.82886820146600 | 0.97934172448700 | 0.10431159722200 |
| 0.82886810514300 | 0.97934156818000 | 0.43764453997100 |
| 0.82886809884500 | 0.97934199454300 | 0.77097912701600 |
| 0.08373449248420 | 0.01493301933870 | 0.00979990131221 |
| 0.08373455885130 | 0.01493234565910 | 0.34313162850200 |
| 0.08373443871650 | 0.01493166921620 | 0.67646561997200 |

|                  |                  |                  |
|------------------|------------------|------------------|
| 0.41706786297800 | 0.01493325135280 | 0.00979996359009 |
| 0.41706792732200 | 0.01493258129250 | 0.34313169123600 |
| 0.41706780705000 | 0.01493187000170 | 0.67646567022900 |
| 0.75040103321200 | 0.01493300953440 | 0.00979990374922 |
| 0.75040109608100 | 0.01493233032940 | 0.34313162669000 |
| 0.75040098200400 | 0.01493165173300 | 0.67646562133800 |
| 0.08239083731230 | 0.01558880980610 | 0.22924650981600 |
| 0.08239083597570 | 0.01558747851450 | 0.56258008402300 |
| 0.08239079796670 | 0.01558811976120 | 0.89591430333700 |
| 0.41572419673700 | 0.01558901674570 | 0.22924652705800 |
| 0.41572419298400 | 0.01558768461950 | 0.56258009138300 |
| 0.41572415879900 | 0.01558831897800 | 0.89591432497700 |
| 0.74905737268200 | 0.01558882363010 | 0.22924649049200 |
| 0.74905736938300 | 0.01558748574730 | 0.56258006703700 |
| 0.74905733638700 | 0.01558813930820 | 0.89591429147400 |
| 0.08382337740420 | 0.01273766464520 | 0.12292026419200 |
| 0.08382328087980 | 0.01273609341460 | 0.45625286349900 |
| 0.08382308729580 | 0.01273639933440 | 0.78958714483700 |
| 0.41715675834200 | 0.01273787677950 | 0.12292027504400 |
| 0.41715665921000 | 0.01273631208360 | 0.45625287305300 |
| 0.41715647190500 | 0.01273658475910 | 0.78958715639900 |
| 0.75048991339500 | 0.01273769501700 | 0.12292026889800 |
| 0.75048980993700 | 0.01273611638800 | 0.45625286704900 |
| 0.75048962691600 | 0.01273642600730 | 0.78958715467400 |
| 0.24978536074700 | 0.01517536936750 | 0.00948400372834 |
| 0.24978529048500 | 0.01517473413160 | 0.34281567106500 |
| 0.24978539694700 | 0.01517395334600 | 0.67614969223200 |
| 0.58311849121200 | 0.01517554930050 | 0.00948404046350 |
| 0.58311841530500 | 0.01517491076510 | 0.34281570309600 |
| 0.58311853277300 | 0.01517410516860 | 0.67614972060600 |

|                  |                  |                  |
|------------------|------------------|------------------|
| 0.91645191867500 | 0.01517529469940 | 0.00948398349280 |
| 0.91645184990000 | 0.01517465445620 | 0.34281564534100 |
| 0.91645196444200 | 0.01517388051980 | 0.67614967610800 |
| 0.24945669883000 | 0.01473999788040 | 0.23026275323100 |
| 0.24945668370600 | 0.01473844820060 | 0.56359623850200 |
| 0.24945672224500 | 0.01473897826570 | 0.89693043304600 |
| 0.58278984890200 | 0.01474014817480 | 0.23026279630100 |
| 0.58278983341800 | 0.01473859418880 | 0.56359627764900 |
| 0.58278987677400 | 0.01473911832270 | 0.89693047988300 |
| 0.91612326051500 | 0.01473991460390 | 0.23026275975000 |
| 0.91612324986600 | 0.01473835926540 | 0.56359625025100 |
| 0.91612328805800 | 0.01473889444130 | 0.89693043986300 |
| 0.25281455993700 | 0.01607067455600 | 0.11990908178700 |
| 0.25281458020700 | 0.01606884494580 | 0.45324160415300 |
| 0.25281474325800 | 0.01606918410270 | 0.78657585120000 |
| 0.58614767777800 | 0.01607077567470 | 0.11990907843500 |
| 0.58614769224100 | 0.01606894356280 | 0.45324160160300 |
| 0.58614786708900 | 0.01606926348000 | 0.78657584817400 |
| 0.91948110886500 | 0.01607054636170 | 0.11990906448700 |
| 0.91948113418100 | 0.01606871037910 | 0.45324158872500 |
| 0.91948130535100 | 0.01606906291960 | 0.78657583622900 |
| 0.12654210126500 | 0.06168136396220 | 0.05606084342610 |
| 0.12654203919500 | 0.06168106958810 | 0.38939293422500 |
| 0.12654188705400 | 0.06168084408610 | 0.72272710162400 |
| 0.45987543509400 | 0.06168146940420 | 0.05606084618780 |
| 0.45987536892300 | 0.06168117738170 | 0.38939293730900 |
| 0.45987522226000 | 0.06168092529950 | 0.72272710904400 |
| 0.79320863381400 | 0.06168134797970 | 0.05606086156680 |
| 0.79320856671000 | 0.06168105291500 | 0.38939294763600 |
| 0.79320842188300 | 0.06168082759200 | 0.72272712065200 |

|                  |                  |                  |
|------------------|------------------|------------------|
| 0.12517642827000 | 0.06187740978020 | 0.27694857084300 |
| 0.12517641598400 | 0.06187679427490 | 0.61028256558400 |
| 0.12517639723600 | 0.06187723426960 | 0.94361674920700 |
| 0.45850974219200 | 0.06187754336040 | 0.27694858558300 |
| 0.45850972772100 | 0.06187691802000 | 0.61028256461800 |
| 0.45850971270700 | 0.06187736488370 | 0.94361676773600 |
| 0.79184297404100 | 0.06187740385060 | 0.27694856589900 |
| 0.79184296340500 | 0.06187678480390 | 0.61028256659700 |
| 0.79184294265100 | 0.06187723033010 | 0.94361674891600 |
| 0.12514190048300 | 0.06067900273590 | 0.16348811511900 |
| 0.12514199893300 | 0.06067854106740 | 0.49682154004100 |
| 0.12514184468500 | 0.06067869435850 | 0.83015570351900 |
| 0.45847518624500 | 0.06067908419740 | 0.16348807261300 |
| 0.45847528115800 | 0.06067862680530 | 0.49682149359700 |
| 0.45847513754400 | 0.06067876305270 | 0.83015566902600 |
| 0.79180841324600 | 0.06067900423690 | 0.16348810569700 |
| 0.79180850914200 | 0.06067854067850 | 0.49682153413800 |
| 0.79180835958700 | 0.06067869723040 | 0.83015570120500 |
| 0.29167919069600 | 0.06096772538210 | 0.05423168364570 |
| 0.29167908364300 | 0.06096713327990 | 0.38756390631100 |
| 0.29167919044800 | 0.06096688240270 | 0.72089818648500 |
| 0.62501222111000 | 0.06096775801840 | 0.05423166450230 |
| 0.62501210797900 | 0.06096716161820 | 0.38756388617200 |
| 0.62501224170500 | 0.06096690397680 | 0.72089817031200 |
| 0.95834571952900 | 0.06096764347830 | 0.05423167036290 |
| 0.95834561610100 | 0.06096704848460 | 0.38756389191700 |
| 0.95834573745300 | 0.06096680846360 | 0.72089817741400 |
| 0.29189038746700 | 0.06117011726050 | 0.27648303947600 |
| 0.29189051957200 | 0.06116945074030 | 0.60981716889700 |
| 0.29189057451000 | 0.06116992035590 | 0.94315137125000 |



|                  |                  |                  |
|------------------|------------------|------------------|
| 0.62522343693000 | 0.06117014762080 | 0.27648302901000 |
| 0.62522357636100 | 0.06116947701890 | 0.60981715924200 |
| 0.62522363367900 | 0.06116995046650 | 0.94315136826000 |
| 0.95855693497400 | 0.06117004438560 | 0.27648303465200 |
| 0.95855707524100 | 0.06116937924060 | 0.60981717603500 |
| 0.95855712473800 | 0.06116984795200 | 0.94315136748300 |
| 0.29177920379400 | 0.06225519571470 | 0.16542060938700 |
| 0.29177925013600 | 0.06225423510660 | 0.49875414882800 |
| 0.29177933325000 | 0.06225439163980 | 0.83208813271500 |
| 0.62511226704200 | 0.06225522154940 | 0.16542061913300 |
| 0.62511230688900 | 0.06225425875390 | 0.49875416149100 |
| 0.62511241346800 | 0.06225441091320 | 0.83208814730500 |
| 0.95844575148500 | 0.06225511042880 | 0.16542064879300 |
| 0.95844580282500 | 0.06225414664140 | 0.49875419263700 |
| 0.95844589429700 | 0.06225431167150 | 0.83208816612200 |
| 0.04272763733960 | 0.06083189582700 | 0.05498572643520 |
| 0.04272777123030 | 0.06083133944070 | 0.38831799393300 |
| 0.04272765067160 | 0.06083110352790 | 0.72165223425100 |
| 0.37606105302700 | 0.06083201850350 | 0.05498572309340 |
| 0.37606118423300 | 0.06083146469200 | 0.38831799081700 |
| 0.37606105929600 | 0.06083120662340 | 0.72165222898600 |
| 0.70939411947400 | 0.06083193326010 | 0.05498574666970 |
| 0.70939424780500 | 0.06083137420410 | 0.38831801305700 |
| 0.70939414263300 | 0.06083113336520 | 0.72165225522200 |
| 0.04157081298020 | 0.06208680486910 | 0.27721686468300 |
| 0.04157080674230 | 0.06208618617080 | 0.61055095835600 |
| 0.04157075919760 | 0.06208667159430 | 0.94388509726100 |
| 0.37490422482200 | 0.06208691611250 | 0.27721687029000 |
| 0.37490421378900 | 0.06208629102060 | 0.61055094839000 |
| 0.37490417060800 | 0.06208678059840 | 0.94388510582600 |

|                  |                  |                  |
|------------------|------------------|------------------|
| 0.70823730562000 | 0.06208684090660 | 0.27721685980800 |
| 0.70823729974900 | 0.06208621848800 | 0.61055095324200 |
| 0.70823725726500 | 0.06208671041520 | 0.94388509716900 |
| 0.04161657482260 | 0.06258930129390 | 0.16558990885800 |
| 0.04161661997420 | 0.06258841242410 | 0.49892343283400 |
| 0.04161652467920 | 0.06258858314290 | 0.83225744315900 |
| 0.37494998634700 | 0.06258941903080 | 0.16558986966200 |
| 0.37495002991200 | 0.06258853341300 | 0.49892338864600 |
| 0.37494993405400 | 0.06258868920350 | 0.83225741410000 |
| 0.70828306928500 | 0.06258934806960 | 0.16558988389700 |
| 0.70828310684200 | 0.06258845523700 | 0.49892340847200 |
| 0.70828302929400 | 0.06258862608300 | 0.83225742828400 |
| 0.20640338860200 | 0.06111587394060 | 0.05533934026340 |
| 0.20640340321600 | 0.06111552053940 | 0.38867139860500 |
| 0.20640354492900 | 0.06111525801700 | 0.72200560622800 |
| 0.53973653244700 | 0.06111597516830 | 0.05533931891720 |
| 0.53973653926900 | 0.06111562162110 | 0.38867137647200 |
| 0.53973669024000 | 0.06111533484170 | 0.72200559018400 |
| 0.87306992551200 | 0.06111583766340 | 0.05533932677500 |
| 0.87306994299700 | 0.06111548254210 | 0.38867138050000 |
| 0.87307009234300 | 0.06111522188790 | 0.72200559441900 |
| 0.20804875202100 | 0.06151183524360 | 0.27696512801700 |
| 0.20804864156600 | 0.06151120146170 | 0.61029918806500 |
| 0.20804864408400 | 0.06151164169940 | 0.94363341535000 |
| 0.54138194517800 | 0.06151194470580 | 0.27696513371200 |
| 0.54138183735300 | 0.06151130171080 | 0.61029918310000 |
| 0.54138183897200 | 0.06151174823560 | 0.94363342809100 |
| 0.87471530728000 | 0.06151179683750 | 0.27696512417700 |
| 0.87471520074300 | 0.06151116128830 | 0.61029919313800 |
| 0.87471519921800 | 0.06151160334970 | 0.94363341665300 |

|                  |                  |                  |
|------------------|------------------|------------------|
| 0.20848514245900 | 0.06326002119910 | 0.16554214929900 |
| 0.20848497621900 | 0.06325939945210 | 0.49887560635800 |
| 0.20848510692700 | 0.06325959251720 | 0.83220971286700 |
| 0.54181831023100 | 0.06326009077300 | 0.16554212688000 |
| 0.54181813759000 | 0.06325947157880 | 0.49887558246600 |
| 0.54181827193000 | 0.06325964975190 | 0.83220969712600 |
| 0.87515166079600 | 0.06325997396190 | 0.16554216437400 |
| 0.87515149841300 | 0.06325935001630 | 0.49887562611500 |
| 0.87515163401200 | 0.06325954576250 | 0.83220973063400 |
| 0.00000000000000 | 0.13043999660500 | 0.00000000000000 |
| 0.00000000000000 | 0.13043999660500 | 0.33333333333200 |
| 0.00000000000000 | 0.13043999660500 | 0.66666666666800 |
| 0.33333333333200 | 0.13043999660500 | 0.00000000000000 |
| 0.33333333333200 | 0.13043999660500 | 0.33333333333200 |
| 0.33333333333200 | 0.13043999660500 | 0.66666666666800 |
| 0.66666666666800 | 0.13043999660500 | 0.00000000000000 |
| 0.66666666666800 | 0.13043999660500 | 0.33333333333200 |
| 0.66666666666800 | 0.13043999660500 | 0.66666666666800 |
| 0.00000000000000 | 0.13043999660500 | 0.22222334138000 |
| 0.00000000000000 | 0.13043999660500 | 0.55555667471300 |
| 0.00000000000000 | 0.13043999660500 | 0.88889000804700 |
| 0.33333333333200 | 0.13043999660500 | 0.22222334138000 |
| 0.33333333333200 | 0.13043999660500 | 0.55555667471300 |
| 0.33333333333200 | 0.13043999660500 | 0.88889000804700 |
| 0.66666666666800 | 0.13043999660500 | 0.22222334138000 |
| 0.66666666666800 | 0.13043999660500 | 0.55555667471300 |
| 0.66666666666800 | 0.13043999660500 | 0.88889000804700 |
| 0.00000000000000 | 0.13043999660500 | 0.11111000180100 |
| 0.00000000000000 | 0.13043999660500 | 0.44444333513300 |
| 0.00000000000000 | 0.13043999660500 | 0.77777666846700 |

|                  |                  |                  |
|------------------|------------------|------------------|
| 0.3333333333200  | 0.13043999660500 | 0.11111000180100 |
| 0.3333333333200  | 0.13043999660500 | 0.44444333513300 |
| 0.3333333333200  | 0.13043999660500 | 0.77777666846700 |
| 0.6666666666800  | 0.13043999660500 | 0.11111000180100 |
| 0.6666666666800  | 0.13043999660500 | 0.44444333513300 |
| 0.6666666666800  | 0.13043999660500 | 0.77777666846700 |
| 0.16666666667500 | 0.13043999660500 | 0.00000000000000 |
| 0.16666666667500 | 0.13043999660500 | 0.3333333333200  |
| 0.16666666667500 | 0.13043999660500 | 0.6666666666800  |
| 0.5000000000700  | 0.13043999660500 | 0.00000000000000 |
| 0.5000000000700  | 0.13043999660500 | 0.3333333333200  |
| 0.5000000000700  | 0.13043999660500 | 0.6666666666800  |
| 0.83333333334100 | 0.13043999660500 | 0.00000000000000 |
| 0.83333333334100 | 0.13043999660500 | 0.3333333333200  |
| 0.83333333334100 | 0.13043999660500 | 0.6666666666800  |
| 0.16666666667500 | 0.13043999660500 | 0.22222334138000 |
| 0.16666666667500 | 0.13043999660500 | 0.55555667471300 |
| 0.16666666667500 | 0.13043999660500 | 0.88889000804700 |
| 0.5000000000700  | 0.13043999660500 | 0.22222334138000 |
| 0.5000000000700  | 0.13043999660500 | 0.55555667471300 |
| 0.5000000000700  | 0.13043999660500 | 0.88889000804700 |
| 0.83333333334100 | 0.13043999660500 | 0.22222334138000 |
| 0.83333333334100 | 0.13043999660500 | 0.55555667471300 |
| 0.83333333334100 | 0.13043999660500 | 0.88889000804700 |
| 0.16666666667500 | 0.13043999660500 | 0.11111000180100 |
| 0.16666666667500 | 0.13043999660500 | 0.44444333513300 |
| 0.16666666667500 | 0.13043999660500 | 0.77777666846700 |
| 0.5000000000700  | 0.13043999660500 | 0.11111000180100 |
| 0.5000000000700  | 0.13043999660500 | 0.44444333513300 |
| 0.5000000000700  | 0.13043999660500 | 0.77777666846700 |

|                  |                  |                  |
|------------------|------------------|------------------|
| 0.83333333334100 | 0.13043999660500 | 0.11111000180100 |
| 0.83333333334100 | 0.13043999660500 | 0.44444333513300 |
| 0.83333333334100 | 0.13043999660500 | 0.77777666846700 |
| 0.08333333332670 | 0.13043999660500 | 0.00000000000000 |
| 0.08333333332670 | 0.13043999660500 | 0.3333333333200  |
| 0.08333333332670 | 0.13043999660500 | 0.66666666666800 |
| 0.41666666666100 | 0.13043999660500 | 0.00000000000000 |
| 0.41666666666100 | 0.13043999660500 | 0.3333333333200  |
| 0.41666666666100 | 0.13043999660500 | 0.66666666666800 |
| 0.7499999999300  | 0.13043999660500 | 0.00000000000000 |
| 0.7499999999300  | 0.13043999660500 | 0.3333333333200  |
| 0.7499999999300  | 0.13043999660500 | 0.66666666666800 |
| 0.08333333332670 | 0.13043999660500 | 0.22222334138000 |
| 0.08333333332670 | 0.13043999660500 | 0.55555667471300 |
| 0.08333333332670 | 0.13043999660500 | 0.88889000804700 |
| 0.41666666666100 | 0.13043999660500 | 0.22222334138000 |
| 0.41666666666100 | 0.13043999660500 | 0.55555667471300 |
| 0.41666666666100 | 0.13043999660500 | 0.88889000804700 |
| 0.7499999999300  | 0.13043999660500 | 0.22222334138000 |
| 0.7499999999300  | 0.13043999660500 | 0.55555667471300 |
| 0.7499999999300  | 0.13043999660500 | 0.88889000804700 |
| 0.08333333332670 | 0.13043999660500 | 0.11111000180100 |
| 0.08333333332670 | 0.13043999660500 | 0.44444333513300 |
| 0.08333333332670 | 0.13043999660500 | 0.77777666846700 |
| 0.41666666666100 | 0.13043999660500 | 0.11111000180100 |
| 0.41666666666100 | 0.13043999660500 | 0.44444333513300 |
| 0.41666666666100 | 0.13043999660500 | 0.77777666846700 |
| 0.7499999999300  | 0.13043999660500 | 0.11111000180100 |
| 0.7499999999300  | 0.13043999660500 | 0.44444333513300 |
| 0.7499999999300  | 0.13043999660500 | 0.77777666846700 |

|                  |                  |                  |
|------------------|------------------|------------------|
| 0.25000000008900 | 0.13043999660500 | 0.00000000000000 |
| 0.25000000008900 | 0.13043999660500 | 0.33333333333200 |
| 0.25000000008900 | 0.13043999660500 | 0.66666666666800 |
| 0.58333333342100 | 0.13043999660500 | 0.00000000000000 |
| 0.58333333342100 | 0.13043999660500 | 0.33333333333200 |
| 0.58333333342100 | 0.13043999660500 | 0.66666666666800 |
| 0.91666666675500 | 0.13043999660500 | 0.00000000000000 |
| 0.91666666675500 | 0.13043999660500 | 0.33333333333200 |
| 0.91666666675500 | 0.13043999660500 | 0.66666666666800 |
| 0.25000000008900 | 0.13043999660500 | 0.22222334138000 |
| 0.25000000008900 | 0.13043999660500 | 0.55555667471300 |
| 0.25000000008900 | 0.13043999660500 | 0.88889000804700 |
| 0.58333333342100 | 0.13043999660500 | 0.22222334138000 |
| 0.58333333342100 | 0.13043999660500 | 0.55555667471300 |
| 0.58333333342100 | 0.13043999660500 | 0.88889000804700 |
| 0.91666666675500 | 0.13043999660500 | 0.22222334138000 |
| 0.91666666675500 | 0.13043999660500 | 0.55555667471300 |
| 0.91666666675500 | 0.13043999660500 | 0.88889000804700 |
| 0.25000000008900 | 0.13043999660500 | 0.11111000180100 |
| 0.25000000008900 | 0.13043999660500 | 0.44444333513300 |
| 0.25000000008900 | 0.13043999660500 | 0.77777666846700 |
| 0.58333333342100 | 0.13043999660500 | 0.11111000180100 |
| 0.58333333342100 | 0.13043999660500 | 0.44444333513300 |
| 0.58333333342100 | 0.13043999660500 | 0.77777666846700 |
| 0.91666666675500 | 0.13043999660500 | 0.11111000180100 |
| 0.91666666675500 | 0.13043999660500 | 0.44444333513300 |
| 0.91666666675500 | 0.13043999660500 | 0.77777666846700 |
| 0.12654055811900 | 0.19921066354400 | 0.05604401097360 |
| 0.12654049506000 | 0.19921095498500 | 0.38937609577700 |
| 0.12654034020200 | 0.19921116961700 | 0.72271026313800 |

|                  |                  |                  |
|------------------|------------------|------------------|
| 0.45987389247700 | 0.19921056048000 | 0.05604401391510 |
| 0.45987382530700 | 0.19921084977500 | 0.38937609897400 |
| 0.45987367602200 | 0.19921109074700 | 0.72271027086300 |
| 0.79320709057700 | 0.19921067950700 | 0.05604402923220 |
| 0.79320702238000 | 0.19921097143500 | 0.38937610925100 |
| 0.79320687494700 | 0.19921118580300 | 0.72271028223000 |
| 0.12517970688000 | 0.19899273621700 | 0.27695022367800 |
| 0.12517969468400 | 0.19899334790400 | 0.61028421744000 |
| 0.12517967361700 | 0.19899291626900 | 0.94361840061200 |
| 0.45851302093000 | 0.19899260360400 | 0.27695023868200 |
| 0.45851300658800 | 0.19899322470200 | 0.61028421670800 |
| 0.45851298926000 | 0.19899278638500 | 0.94361841940400 |
| 0.79184625241000 | 0.19899274214300 | 0.27695021860200 |
| 0.79184624194500 | 0.19899335731300 | 0.61028421833600 |
| 0.79184621889000 | 0.19899292017600 | 0.94361840025400 |
| 0.12512673075000 | 0.20016978678300 | 0.16354018597200 |
| 0.12512682757700 | 0.20017024283900 | 0.49687361152900 |
| 0.12512667112600 | 0.20017008714500 | 0.83020778033000 |
| 0.45846001683800 | 0.20016970742100 | 0.16354014294000 |
| 0.45846011014800 | 0.20017015909700 | 0.49687356444400 |
| 0.45845996438200 | 0.20017002047500 | 0.83020774526500 |
| 0.79179324330300 | 0.20016978547800 | 0.16354017654000 |
| 0.79179333758600 | 0.20017024322800 | 0.49687360566300 |
| 0.79179318588100 | 0.20017008421700 | 0.83020777807500 |
| 0.29169218863800 | 0.19990052408700 | 0.05424108970550 |
| 0.29169208120000 | 0.19990111596100 | 0.38757331487700 |
| 0.29169218759200 | 0.19990135761400 | 0.72090759702100 |
| 0.62502521865000 | 0.19990049171600 | 0.05424107056020 |
| 0.62502510504900 | 0.19990108787100 | 0.38757329473400 |
| 0.62502523846200 | 0.19990133624600 | 0.72090758087400 |

|                  |                  |                  |
|------------------|------------------|------------------|
| 0.95835871736200 | 0.19990060549900 | 0.05424107649170 |
| 0.95835861352100 | 0.19990120007300 | 0.38757330065600 |
| 0.95835873456500 | 0.19990143115500 | 0.72090758800400 |
| 0.29191025770900 | 0.19970823385700 | 0.27649017181900 |
| 0.29191038900900 | 0.19970889278600 | 0.60982430055700 |
| 0.29191044393700 | 0.19970842734500 | 0.94315849934100 |
| 0.62524330711000 | 0.19970820377400 | 0.27649016134600 |
| 0.62524344584000 | 0.19970886672700 | 0.60982429091900 |
| 0.62524350308700 | 0.19970839747100 | 0.94315849636300 |
| 0.95857680531800 | 0.19970830612800 | 0.27649016697700 |
| 0.95857694480600 | 0.19970896399500 | 0.60982430767900 |
| 0.95857699424700 | 0.19970849942800 | 0.94315849553000 |
| 0.29182812624100 | 0.19863295208400 | 0.16545855062500 |
| 0.29182817022100 | 0.19863391533800 | 0.49879208751200 |
| 0.29182825461100 | 0.19863375736700 | 0.83212607259600 |
| 0.62516118950100 | 0.19863292638400 | 0.16545856056900 |
| 0.62516122698100 | 0.19863389180000 | 0.49879210036200 |
| 0.62516133479300 | 0.19863373818200 | 0.83212608736900 |
| 0.95849467406600 | 0.19863303684100 | 0.16545859003200 |
| 0.95849472303100 | 0.19863400337000 | 0.49879213139500 |
| 0.95849481578400 | 0.19863383696400 | 0.83212610603400 |
| 0.04272733125210 | 0.20003725861600 | 0.05498810904170 |
| 0.04272746609340 | 0.20003781227000 | 0.38832038080900 |
| 0.04272734445760 | 0.20003803738900 | 0.72165462239700 |
| 0.37606074724000 | 0.20003713710500 | 0.05498810553870 |
| 0.37606087939400 | 0.20003768839700 | 0.38832037742300 |
| 0.37606075339300 | 0.20003793524000 | 0.72165461703600 |
| 0.70939381327000 | 0.20003722128700 | 0.05498812932240 |
| 0.70939394246700 | 0.20003777762700 | 0.38832039990000 |
| 0.70939383630000 | 0.20003800746100 | 0.72165464341300 |



|                  |                  |                  |
|------------------|------------------|------------------|
| 0.04157670159820 | 0.19883675281500 | 0.27721047791000 |
| 0.04157669499400 | 0.19883737157900 | 0.61054456881200 |
| 0.04157664489280 | 0.19883689293000 | 0.94387870961000 |
| 0.37491011357600 | 0.19883664219000 | 0.27721048374300 |
| 0.37491010215800 | 0.19883726694000 | 0.61054455903800 |
| 0.37491005643100 | 0.19883678425800 | 0.94387871841400 |
| 0.70824319420600 | 0.19883671722300 | 0.27721047298000 |
| 0.70824318802400 | 0.19883733947600 | 0.61054456364500 |
| 0.70824314296500 | 0.19883685435900 | 0.94387870951800 |
| 0.04163181347170 | 0.19829338033500 | 0.16563255069300 |
| 0.04163185747590 | 0.19829427117300 | 0.49896607382100 |
| 0.04163176005580 | 0.19829409828000 | 0.83230008338000 |
| 0.37496522520200 | 0.19829326337600 | 0.16563251153500 |
| 0.37496526760700 | 0.19829415085100 | 0.49896602957400 |
| 0.37496516965000 | 0.19829399281100 | 0.83230005431700 |
| 0.70829830808800 | 0.19829333397100 | 0.16563252583800 |
| 0.70829834446900 | 0.19829422862500 | 0.49896604953000 |
| 0.70829826476000 | 0.19829405549900 | 0.83230006862000 |
| 0.20642258692500 | 0.19976094419000 | 0.05533226477110 |
| 0.20642260706000 | 0.19976129456500 | 0.38866432386300 |
| 0.20642274971000 | 0.19976154770500 | 0.72199853110500 |
| 0.53975572996500 | 0.19976084494600 | 0.05533224356910 |
| 0.53975574225100 | 0.19976119559400 | 0.38866430183300 |
| 0.53975589424500 | 0.19976147287400 | 0.72199851530900 |
| 0.87308912382000 | 0.19976098032200 | 0.05533225134070 |
| 0.87308914683400 | 0.19976133217900 | 0.38866430583700 |
| 0.87308929720500 | 0.19976158353500 | 0.72199851932900 |
| 0.20807300292500 | 0.19934517113500 | 0.27696977529400 |
| 0.20807289222600 | 0.19934580342900 | 0.61030383083600 |
| 0.20807289899900 | 0.19934535805800 | 0.94363806278300 |

|                  |                  |                  |
|------------------|------------------|------------------|
| 0.54140619543600 | 0.19934506245900 | 0.27696978128100 |
| 0.54140608742900 | 0.19934570373900 | 0.61030382612200 |
| 0.54140609329200 | 0.19934525216800 | 0.94363807580700 |
| 0.87473955791100 | 0.19934520916400 | 0.27696977148500 |
| 0.87473945125200 | 0.19934584336800 | 0.61030383592600 |
| 0.87473945397500 | 0.19934539622900 | 0.94363806410200 |
| 0.20849077533200 | 0.19760895489400 | 0.16556824762500 |
| 0.20849060964900 | 0.19760957521700 | 0.49890170629700 |
| 0.20849074572600 | 0.19760937905100 | 0.83223581285300 |
| 0.54182394238800 | 0.19760888669600 | 0.16556822479800 |
| 0.54182377029400 | 0.19760950440200 | 0.49890168193400 |
| 0.54182391002500 | 0.19760932320300 | 0.83223579664700 |
| 0.87515729339200 | 0.19760900188900 | 0.16556826266600 |
| 0.87515713165200 | 0.19760962435500 | 0.49890172610000 |
| 0.87515727266700 | 0.19760942552900 | 0.83223583067000 |
| 0.00015815118113 | 0.24522818688700 | 0.00997452410917 |
| 0.00015815214937 | 0.24522905991700 | 0.34330618815100 |
| 0.00015817561839 | 0.24522970385000 | 0.67664027498300 |
| 0.33349158081800 | 0.24522801464600 | 0.00997456880211 |
| 0.33349158030600 | 0.24522888381100 | 0.34330623503800 |
| 0.33349159591900 | 0.24522955230800 | 0.67664030730300 |
| 0.66682466170500 | 0.24522806852200 | 0.00997455060948 |
| 0.66682465646300 | 0.24522894651700 | 0.34330621198000 |
| 0.66682468841700 | 0.24522960665700 | 0.67664029234900 |
| 0.33286078878900 | 0.25375397626200 | 0.22363568077000 |
| 0.33286085929700 | 0.25375522927000 | 0.55696925114000 |
| 0.33286087402000 | 0.25375465617000 | 0.89030336891500 |
| 0.66619389068400 | 0.25375401194400 | 0.22363567821300 |
| 0.66619396066200 | 0.25375526932600 | 0.55696925328700 |
| 0.66619398578900 | 0.25375468875800 | 0.89030336995500 |

|                  |                  |                  |
|------------------|------------------|------------------|
| 0.99952736998300 | 0.25375412543700 | 0.22363567850400 |
| 0.99952744454700 | 0.25375537926100 | 0.55696925626500 |
| 0.99952745880800 | 0.25375480021600 | 0.89030336315800 |
| 0.00039988611729 | 0.24544210920600 | 0.11979730176500 |
| 0.00039994764902 | 0.24544426424500 | 0.45312979401400 |
| 0.00039991768445 | 0.24544390293000 | 0.78646401670600 |
| 0.33373330831900 | 0.24544191547700 | 0.11979731753500 |
| 0.33373336684000 | 0.24544406387500 | 0.45312980803200 |
| 0.33373333149900 | 0.24544373293300 | 0.78646403065000 |
| 0.66706640544400 | 0.24544197222600 | 0.11979731386100 |
| 0.66706645929100 | 0.24544413116000 | 0.45312980471000 |
| 0.66706644349700 | 0.24544378688600 | 0.78646403009500 |
| 0.16671132399800 | 0.24603886845200 | 0.01008370253250 |
| 0.16671133787100 | 0.24603942391900 | 0.34341534374800 |
| 0.16671131333600 | 0.24604014060100 | 0.67674928118500 |
| 0.50004458680400 | 0.24603860848400 | 0.01008378093620 |
| 0.50004459685200 | 0.24603916170100 | 0.34341542074200 |
| 0.50004457592600 | 0.24603991530300 | 0.67674935119600 |
| 0.83337789278300 | 0.24603890852100 | 0.01008369689910 |
| 0.83337790606100 | 0.24603946923700 | 0.34341533058200 |
| 0.83337788588300 | 0.24604018490500 | 0.67674927510600 |
| 0.16480927449800 | 0.25327703177200 | 0.22325733393400 |
| 0.16480921042500 | 0.25327812777900 | 0.55659091507600 |
| 0.16480920706200 | 0.25327760391400 | 0.88992509800500 |
| 0.49814253933300 | 0.25327684581700 | 0.22325735747900 |
| 0.49814247264400 | 0.25327794373500 | 0.55659093071900 |
| 0.49814247237300 | 0.25327742589600 | 0.88992512451000 |
| 0.83147583698400 | 0.25327706234600 | 0.22325732854000 |
| 0.83147577375900 | 0.25327816455500 | 0.55659091446800 |
| 0.83147577086500 | 0.25327763314500 | 0.88992509751800 |

|                  |                  |                  |
|------------------|------------------|------------------|
| 0.16221418722500 | 0.28138921370500 | 0.10434160208600 |
| 0.16221408926500 | 0.28138935802000 | 0.43767454631800 |
| 0.16221407782400 | 0.28138891696300 | 0.77100913761600 |
| 0.49554741454900 | 0.28138914542700 | 0.10434150788000 |
| 0.49554731116100 | 0.28138928592300 | 0.43767445059900 |
| 0.49554730649300 | 0.28138886992900 | 0.77100904840400 |
| 0.82888068587900 | 0.28138926134200 | 0.10434158907300 |
| 0.82888058687500 | 0.28138940274700 | 0.43767453833800 |
| 0.82888058160600 | 0.28138896155100 | 0.77100913121500 |
| 0.08374614185110 | 0.24593120010000 | 0.00980067739626 |
| 0.08374620476360 | 0.24593186886000 | 0.34313240455800 |
| 0.08374608392500 | 0.24593253611100 | 0.67646639476500 |
| 0.41707951278500 | 0.24593096869600 | 0.00980074012059 |
| 0.41707957364300 | 0.24593163390100 | 0.34313246772300 |
| 0.41707945268000 | 0.24593233584400 | 0.67646644547600 |
| 0.75041268251600 | 0.24593121005700 | 0.00980067973021 |
| 0.75041274183100 | 0.24593188435100 | 0.34313240255900 |
| 0.75041262714200 | 0.24593255373300 | 0.67646639592900 |
| 0.08240523010690 | 0.24546667235600 | 0.22936553604000 |
| 0.08240522754950 | 0.24546800616200 | 0.56269910843000 |
| 0.08240518937900 | 0.24546736055600 | 0.89603333152700 |
| 0.41573858964100 | 0.24546646572900 | 0.22936555329700 |
| 0.41573858466600 | 0.24546780043800 | 0.56269911563300 |
| 0.41573855034800 | 0.24546716165100 | 0.89603335307200 |
| 0.74907176548500 | 0.24546665843400 | 0.22936551682000 |
| 0.74907176102100 | 0.24546799879600 | 0.56269909154400 |
| 0.74907172784600 | 0.24546734087000 | 0.89603331979800 |
| 0.08383091868440 | 0.24811596458600 | 0.12291797300100 |
| 0.08383081722480 | 0.24811752846300 | 0.45625057454900 |
| 0.08383062011110 | 0.24811721884300 | 0.78958485916000 |

|                  |                  |                  |
|------------------|------------------|------------------|
| 0.41716430063100 | 0.24811575356400 | 0.12291798352000 |
| 0.41716419658100 | 0.24811731095700 | 0.45625058361100 |
| 0.41716400581400 | 0.24811703447700 | 0.78958487039400 |
| 0.75049745464600 | 0.24811593414800 | 0.12291797787400 |
| 0.75049734614800 | 0.24811750535400 | 0.45625057822400 |
| 0.75049715964500 | 0.24811719205200 | 0.78958486913900 |
| 0.24980108144800 | 0.24570535567900 | 0.00948459886720 |
| 0.24980101001500 | 0.24570598974900 | 0.34281626371000 |
| 0.24980111634200 | 0.24570677406100 | 0.67615027923500 |
| 0.58313421117900 | 0.24570517606600 | 0.00948463587297 |
| 0.58313413401900 | 0.24570581344600 | 0.34281629600500 |
| 0.58313425148100 | 0.24570662255700 | 0.67615030791700 |
| 0.91646763922200 | 0.24570543023900 | 0.00948457858732 |
| 0.91646756923500 | 0.24570606927600 | 0.34281623794700 |
| 0.91646768377500 | 0.24570684675400 | 0.67615026308100 |
| 0.24946710081600 | 0.24619743426800 | 0.23026721425800 |
| 0.24946708565600 | 0.24619898484400 | 0.56360069610000 |
| 0.24946712605100 | 0.24619845152900 | 0.89693489740300 |
| 0.58280025066400 | 0.24619728490800 | 0.23026725708000 |
| 0.58280023518600 | 0.24619883980700 | 0.56360073491700 |
| 0.58280028037900 | 0.24619831242000 | 0.89693494394600 |
| 0.91613366233700 | 0.24619751792800 | 0.23026722053000 |
| 0.91613365171600 | 0.24619907403000 | 0.56360070773500 |
| 0.91613369177000 | 0.24619853563600 | 0.89693490408200 |
| 0.25285050753100 | 0.24479237489000 | 0.11992208202300 |
| 0.25285053364200 | 0.24479420099500 | 0.45325460610700 |
| 0.25285069820100 | 0.24479386384000 | 0.78658885698800 |
| 0.58618362434500 | 0.24479227500100 | 0.11992207816400 |
| 0.58618364460000 | 0.24479410360700 | 0.45325460300600 |
| 0.58618382100500 | 0.24479378565600 | 0.78658885348700 |

|                  |                  |                  |
|------------------|------------------|------------------|
| 0.91951705637000 | 0.24479250331100 | 0.11992206458900 |
| 0.91951708757500 | 0.24479433566900 | 0.45325459068500 |
| 0.91951726032900 | 0.24479398515800 | 0.78658884195600 |
| 0.12516584436200 | 0.98983580410900 | 0.03212901258620 |
| 0.12516581865300 | 0.98983541147700 | 0.36546151867200 |
| 0.12516576727300 | 0.98983502905800 | 0.69879519935300 |
| 0.45849917741700 | 0.98983595820800 | 0.03212901960900 |
| 0.45849915006500 | 0.98983556749900 | 0.36546152584000 |
| 0.45849910084100 | 0.98983516617100 | 0.69879520612300 |
| 0.79183244903200 | 0.98983579289000 | 0.03212901744790 |
| 0.79183242120900 | 0.98983539643100 | 0.36546152135600 |
| 0.79183237318900 | 0.98983501436100 | 0.69879520468800 |
| 0.12446747319400 | 0.99235317860300 | 0.25078677673200 |
| 0.12446750177800 | 0.99235245050000 | 0.58412032817000 |
| 0.12446746764500 | 0.99235276453900 | 0.91745425632500 |
| 0.45780079157500 | 0.99235330123800 | 0.25078677353800 |
| 0.45780081962400 | 0.99235256974300 | 0.58412031889300 |
| 0.45780078753700 | 0.99235288372500 | 0.91745425485200 |
| 0.79113407945900 | 0.99235316955500 | 0.25078677333400 |
| 0.79113410831400 | 0.99235243796800 | 0.58412032725100 |
| 0.79113407451300 | 0.99235275722100 | 0.91745425519300 |
| 0.12600201863600 | 0.98827249734700 | 0.14242446029900 |
| 0.12600205497500 | 0.98827165315100 | 0.47575770587600 |
| 0.12600193955900 | 0.98827175030300 | 0.80909164409600 |
| 0.45933533117300 | 0.98827262782400 | 0.14242442779300 |
| 0.45933536622500 | 0.98827178661800 | 0.47575767199200 |
| 0.45933525673200 | 0.98827186983400 | 0.80909161410000 |
| 0.79266861463800 | 0.98827249976100 | 0.14242445358900 |
| 0.79266864890300 | 0.98827165046200 | 0.47575770114100 |
| 0.79266853733600 | 0.98827175094900 | 0.80909164085500 |

|                  |                  |                  |
|------------------|------------------|------------------|
| 0.29158421094200 | 0.98936690029300 | 0.03109027435920 |
| 0.29158417142600 | 0.98936638538500 | 0.36442281483100 |
| 0.29158421108500 | 0.98936598320900 | 0.69775658474000 |
| 0.62491741241700 | 0.98936693811700 | 0.03109027002520 |
| 0.62491736968800 | 0.98936641901700 | 0.36442280964700 |
| 0.62491741927000 | 0.98936601235300 | 0.69775658071900 |
| 0.95825081766300 | 0.98936681371600 | 0.03109027176300 |
| 0.95825077920700 | 0.98936629548200 | 0.36442281140400 |
| 0.95825082412900 | 0.98936590301300 | 0.69775658497600 |
| 0.29194689094200 | 0.99067913674700 | 0.25062914925800 |
| 0.29194695443300 | 0.99067831496000 | 0.58396271802100 |
| 0.29194697095500 | 0.99067864686000 | 0.91729662872500 |
| 0.62528010047800 | 0.99067917434900 | 0.25062914785100 |
| 0.62528016510900 | 0.99067834987300 | 0.58396271711100 |
| 0.62528018506100 | 0.99067868313700 | 0.91729662962500 |
| 0.95861350570700 | 0.99067907253500 | 0.25062915470200 |
| 0.95861357193900 | 0.99067824969600 | 0.58396272814500 |
| 0.95861358745600 | 0.99067858363000 | 0.91729663351300 |
| 0.29305787400100 | 0.98919971301100 | 0.14284693691100 |
| 0.29305786443000 | 0.98919866088800 | 0.47618011967200 |
| 0.29305792876500 | 0.98919867022600 | 0.80951396283300 |
| 0.62639108749800 | 0.98919973672100 | 0.14284693546900 |
| 0.62639107464500 | 0.98919868133400 | 0.47618011943600 |
| 0.62639114899600 | 0.98919868874800 | 0.80951396282300 |
| 0.95972448610100 | 0.98919961624200 | 0.14284695152300 |
| 0.95972447817100 | 0.98919856017200 | 0.47618013630900 |
| 0.95972454654700 | 0.98919858064100 | 0.80951397592300 |
| 0.04190949139840 | 0.98943968555100 | 0.03136685359250 |
| 0.04190951573620 | 0.98943918245800 | 0.36469941598800 |
| 0.04190948597860 | 0.98943880325500 | 0.69803317741000 |

|                  |                  |                  |
|------------------|------------------|------------------|
| 0.37524286227400 | 0.98943982204400 | 0.03136685389120 |
| 0.37524288572400 | 0.98943932145300 | 0.36469941646500 |
| 0.37524285425900 | 0.98943892440300 | 0.69803317466800 |
| 0.70857607716700 | 0.98943972696600 | 0.03136685661950 |
| 0.70857609866100 | 0.98943922060700 | 0.36469941844500 |
| 0.70857607473300 | 0.98943883668600 | 0.69803318006400 |
| 0.04032018696050 | 0.99195066177100 | 0.25097484659700 |
| 0.04032016834640 | 0.99194992673500 | 0.58430842167100 |
| 0.04032017557130 | 0.99195024301200 | 0.91764232940100 |
| 0.37365355773200 | 0.99195076335500 | 0.25097484001100 |
| 0.37365353787200 | 0.99195002670400 | 0.58430840919100 |
| 0.37365354649100 | 0.99195034181800 | 0.91764232483000 |
| 0.70698677593000 | 0.99195069251800 | 0.25097484049200 |
| 0.70698675640600 | 0.99194995470700 | 0.58430841532400 |
| 0.70698676776900 | 0.99195027535200 | 0.91764232622200 |
| 0.04044882107420 | 0.98955997307100 | 0.14341494137100 |
| 0.04044886363240 | 0.98955896967900 | 0.47674812648400 |
| 0.04044877763320 | 0.98955898965500 | 0.81008197855700 |
| 0.37378218601700 | 0.98956010349500 | 0.14341492348900 |
| 0.37378222803900 | 0.98955910363400 | 0.47674810673700 |
| 0.37378214269300 | 0.98955910777600 | 0.81008196343100 |
| 0.70711540962400 | 0.98956002641900 | 0.14341493238600 |
| 0.70711544864500 | 0.98955901936200 | 0.47674811742700 |
| 0.70711537083000 | 0.98955903710200 | 0.81008197317500 |
| 0.20841158895900 | 0.98938393761600 | 0.03161574302870 |
| 0.20841163339100 | 0.98938353161800 | 0.36494823819500 |
| 0.20841166015300 | 0.98938311588900 | 0.69828193631500 |
| 0.54174483600200 | 0.98938407233900 | 0.03161574361890 |
| 0.54174487723000 | 0.98938366575500 | 0.36494823827700 |
| 0.54174490831700 | 0.98938323365000 | 0.69828193690200 |



|                  |                  |                  |
|------------------|------------------|------------------|
| 0.87507819691300 | 0.98938389892900 | 0.03161574127040 |
| 0.87507824237700 | 0.98938348874500 | 0.36494823408200 |
| 0.87507827247800 | 0.98938307541600 | 0.69828193544100 |
| 0.20615618234600 | 0.99130849855600 | 0.25036775901700 |
| 0.20615607799000 | 0.99130773857200 | 0.58370130290500 |
| 0.20615610676200 | 0.99130802574100 | 0.91703523103500 |
| 0.53948945595400 | 0.99130860657000 | 0.25036776056900 |
| 0.53948935156600 | 0.99130784282600 | 0.58370130040100 |
| 0.53948938102200 | 0.99130812984100 | 0.91703523475900 |
| 0.87282279179300 | 0.99130846919900 | 0.25036776139200 |
| 0.87282268869100 | 0.99130770604500 | 0.58370130885300 |
| 0.87282271696200 | 0.99130799658700 | 0.91703523487900 |
| 0.20655838960900 | 0.99828275522300 | 0.13553112816500 |
| 0.20655831397600 | 0.99828208713400 | 0.46886425266400 |
| 0.20655842497200 | 0.99828225341000 | 0.80219811598800 |
| 0.53989164660300 | 0.99828281886300 | 0.13553111821300 |
| 0.53989156771000 | 0.99828215144500 | 0.46886424259100 |
| 0.53989168065300 | 0.99828230826300 | 0.80219810738300 |
| 0.87322498383200 | 0.99828272367300 | 0.13553112705100 |
| 0.87322490998900 | 0.99828205253800 | 0.46886425331700 |
| 0.87322502449600 | 0.99828222191800 | 0.80219811647000 |
| 0.00020030406988 | 0.06452569303500 | 0.08246248151400 |
| 0.00020032369010 | 0.06452538074930 | 0.41579514185900 |
| 0.00020032178184 | 0.06452519339000 | 0.74912907796400 |
| 0.33353369282100 | 0.06452574539720 | 0.08246249444290 |
| 0.33353371111600 | 0.06452543462190 | 0.41579515487600 |
| 0.33353370394200 | 0.06452523776930 | 0.74912908966200 |
| 0.66686687924400 | 0.06452573134350 | 0.08246249290760 |
| 0.66686689464700 | 0.06452541810120 | 0.41579515274600 |
| 0.66686690261700 | 0.06452522465020 | 0.74912908940800 |

|                  |                  |                  |
|------------------|------------------|------------------|
| 0.33323310828400 | 0.06350569678390 | 0.30489299286300 |
| 0.33323313391700 | 0.06350539001260 | 0.63822672352200 |
| 0.33323315374500 | 0.06350553412470 | 0.97156072724000 |
| 0.66656629249200 | 0.06350568342430 | 0.30489298245500 |
| 0.66656632479200 | 0.06350537736990 | 0.63822671769200 |
| 0.66656634213100 | 0.06350552266810 | 0.97156071935800 |
| 0.99989971942000 | 0.06350565089640 | 0.30489297619500 |
| 0.99989974915100 | 0.06350534737610 | 0.63822671559100 |
| 0.99989976504400 | 0.06350548882180 | 0.97156071092100 |
| 0.33326396514100 | 0.06735041883510 | 0.19303833841800 |
| 0.33326400732900 | 0.06735001203710 | 0.52637175832800 |
| 0.33326400828700 | 0.06734988266520 | 0.85970561974800 |
| 0.66659715930900 | 0.06735040762420 | 0.19303834162600 |
| 0.66659719825100 | 0.06734999914590 | 0.52637176390300 |
| 0.66659721155900 | 0.06734987251870 | 0.85970562422100 |
| 0.99993058048600 | 0.06735037519540 | 0.19303834854400 |
| 0.99993062385500 | 0.06734996696150 | 0.52637177172300 |
| 0.99993062706100 | 0.06734984279400 | 0.85970562554100 |
| 0.16684853274500 | 0.06078475293860 | 0.08556144158070 |
| 0.16684853679900 | 0.06078462168300 | 0.41889421205600 |
| 0.16684852734200 | 0.06078455080150 | 0.75222796569800 |
| 0.50018181248500 | 0.06078480206380 | 0.08556142320410 |
| 0.50018181314600 | 0.06078467179400 | 0.41889419441600 |
| 0.50018180767400 | 0.06078458753360 | 0.75222795263800 |
| 0.83351512736100 | 0.06078473706020 | 0.08556144326640 |
| 0.83351513083500 | 0.06078460562450 | 0.41889421274600 |
| 0.83351512482100 | 0.06078453545190 | 0.75222796872300 |
| 0.16662155925800 | 0.06316703550490 | 0.30506489562900 |
| 0.16662152322100 | 0.06316676536690 | 0.63839854423200 |
| 0.16662150728500 | 0.06316685917400 | 0.97173257777500 |

|                  |                  |                  |
|------------------|------------------|------------------|
| 0.49995485254700 | 0.06316710228600 | 0.30506492026500 |
| 0.49995481810900 | 0.06316682397880 | 0.63839856147600 |
| 0.49995480217000 | 0.06316692508090 | 0.97173260410200 |
| 0.83328816917400 | 0.06316702377270 | 0.30506489076500 |
| 0.83328813509300 | 0.06316675276050 | 0.63839854325700 |
| 0.83328811693400 | 0.06316684811780 | 0.97173257592900 |
| 0.16624807083600 | 0.06710195358630 | 0.19235408655800 |
| 0.16624803120100 | 0.06710168365000 | 0.52568748357800 |
| 0.16624802099400 | 0.06710155663220 | 0.85902140672400 |
| 0.49958135695900 | 0.06710199476620 | 0.19235408465500 |
| 0.49958131562500 | 0.06710172756760 | 0.52568747815500 |
| 0.49958130759500 | 0.06710159339820 | 0.85902140801600 |
| 0.83291466972700 | 0.06710194517960 | 0.19235408611300 |
| 0.83291463063200 | 0.06710167368270 | 0.52568748546100 |
| 0.83291462109400 | 0.06710154866790 | 0.85902140878800 |
| 0.08379318776200 | 0.06220274232310 | 0.08436520680000 |
| 0.08379321385840 | 0.06220250480410 | 0.41769792234800 |
| 0.08379311424950 | 0.06220233859620 | 0.75103180506700 |
| 0.41712654117200 | 0.06220280776940 | 0.08436520966340 |
| 0.41712656616500 | 0.06220257199260 | 0.41769792539700 |
| 0.41712646932200 | 0.06220239256270 | 0.75103180951600 |
| 0.75045977384800 | 0.06220274840820 | 0.08436521654960 |
| 0.75045979664100 | 0.06220250969090 | 0.41769793075400 |
| 0.75045970413800 | 0.06220234306480 | 0.75103181603000 |
| 0.08344485584800 | 0.06329341211300 | 0.30479638138000 |
| 0.08344484597890 | 0.06329314437160 | 0.63813007616200 |
| 0.08344483622130 | 0.06329325344770 | 0.97146405312700 |
| 0.41677820782500 | 0.06329347489020 | 0.30479640228700 |
| 0.41677819669700 | 0.06329320056640 | 0.63813008753200 |
| 0.41677818910700 | 0.06329331526560 | 0.97146407475000 |

|                  |                  |                  |
|------------------|------------------|------------------|
| 0.75011144525200 | 0.06329341409140 | 0.30479637876700 |
| 0.75011143734700 | 0.06329314515540 | 0.63813007515200 |
| 0.75011142709700 | 0.06329325698680 | 0.97146405252900 |
| 0.08381521979510 | 0.06545352825090 | 0.19291273605400 |
| 0.08381529576220 | 0.06545320051060 | 0.52624609830000 |
| 0.08381522504160 | 0.06545306750460 | 0.85958003364400 |
| 0.41714856083800 | 0.06545358130810 | 0.19291273356400 |
| 0.41714863646200 | 0.06545325609570 | 0.52624609169800 |
| 0.41714856879500 | 0.06545311546560 | 0.85958003562600 |
| 0.75048180819800 | 0.06545353488480 | 0.19291272689000 |
| 0.75048188208000 | 0.06545320507840 | 0.52624609012400 |
| 0.75048181662600 | 0.06545307487180 | 0.85958002897800 |
| 0.25005531867700 | 0.06456680763060 | 0.08245736438480 |
| 0.25005527786600 | 0.06456657824020 | 0.41579002259200 |
| 0.25005537751700 | 0.06456638218570 | 0.74912394146200 |
| 0.58338852570000 | 0.06456684285890 | 0.08245735644740 |
| 0.58338848048000 | 0.06456661264950 | 0.41579001474300 |
| 0.58338858994200 | 0.06456640849600 | 0.74912393532100 |
| 0.91672191383300 | 0.06456678007470 | 0.08245735029890 |
| 0.91672187502300 | 0.06456654916550 | 0.41579000788000 |
| 0.91672198119600 | 0.06456635657570 | 0.74912392878800 |
| 0.25009310093700 | 0.06324067503150 | 0.30438534736400 |
| 0.25009311473600 | 0.06324038248710 | 0.63771906950800 |
| 0.25009312417800 | 0.06324049233410 | 0.97105307448100 |
| 0.58342631467700 | 0.06324071564180 | 0.30438535572500 |
| 0.58342633388900 | 0.06324041814840 | 0.63771907402200 |
| 0.58342634145300 | 0.06324053296710 | 0.97105308639300 |
| 0.91675970604900 | 0.06324065106070 | 0.30438533874300 |
| 0.91675972382400 | 0.06324035894900 | 0.63771906672400 |
| 0.91675972929600 | 0.06324046861610 | 0.97105306831000 |

|                  |                  |                  |
|------------------|------------------|------------------|
| 0.25000439759200 | 0.06451046170750 | 0.19349967161500 |
| 0.25000433097300 | 0.06451008468720 | 0.52683300787800 |
| 0.25000438880100 | 0.06450994679110 | 0.86016692118900 |
| 0.58333762316700 | 0.06451049272170 | 0.19349968483400 |
| 0.58333755397500 | 0.06451011698620 | 0.52683301970500 |
| 0.58333761755400 | 0.06450997296210 | 0.86016693692000 |
| 0.91667100029200 | 0.06451043404580 | 0.19349968093900 |
| 0.91667093582100 | 0.06451005543350 | 0.52683301940100 |
| 0.91667099626000 | 0.06450991983190 | 0.86016692933300 |
| 0.12500000000200 | 0.13043999660500 | 0.02777666599470 |
| 0.12500000000200 | 0.13043999660500 | 0.36110999932900 |
| 0.12500000000200 | 0.13043999660500 | 0.69444333266100 |
| 0.45833333333600 | 0.13043999660500 | 0.02777666599470 |
| 0.45833333333600 | 0.13043999660500 | 0.36110999932900 |
| 0.45833333333600 | 0.13043999660500 | 0.69444333266100 |
| 0.79166666666800 | 0.13043999660500 | 0.02777666599470 |
| 0.79166666666800 | 0.13043999660500 | 0.36110999932900 |
| 0.79166666666800 | 0.13043999660500 | 0.69444333266100 |
| 0.12500000000200 | 0.13043999660500 | 0.2499999995100  |
| 0.12500000000200 | 0.13043999660500 | 0.5833333328300  |
| 0.12500000000200 | 0.13043999660500 | 0.9166666661500  |
| 0.45833333333600 | 0.13043999660500 | 0.2499999995100  |
| 0.45833333333600 | 0.13043999660500 | 0.5833333328300  |
| 0.45833333333600 | 0.13043999660500 | 0.9166666661500  |
| 0.79166666666800 | 0.13043999660500 | 0.2499999995100  |
| 0.79166666666800 | 0.13043999660500 | 0.5833333328300  |
| 0.79166666666800 | 0.13043999660500 | 0.9166666661500  |
| 0.12500000000200 | 0.13043999660500 | 0.1388999819000  |
| 0.12500000000200 | 0.13043999660500 | 0.47222333152400 |
| 0.12500000000200 | 0.13043999660500 | 0.80555666485600 |

|                  |                  |                  |
|------------------|------------------|------------------|
| 0.45833333333600 | 0.13043999660500 | 0.13888999819000 |
| 0.45833333333600 | 0.13043999660500 | 0.47222333152400 |
| 0.45833333333600 | 0.13043999660500 | 0.80555666485600 |
| 0.79166666666800 | 0.13043999660500 | 0.13888999819000 |
| 0.79166666666800 | 0.13043999660500 | 0.47222333152400 |
| 0.79166666666800 | 0.13043999660500 | 0.80555666485600 |
| 0.29166666669900 | 0.13043999660500 | 0.02777666599470 |
| 0.29166666669900 | 0.13043999660500 | 0.36110999932900 |
| 0.29166666669900 | 0.13043999660500 | 0.69444333266100 |
| 0.62500000003300 | 0.13043999660500 | 0.02777666599470 |
| 0.62500000003300 | 0.13043999660500 | 0.36110999932900 |
| 0.62500000003300 | 0.13043999660500 | 0.69444333266100 |
| 0.95833333336500 | 0.13043999660500 | 0.02777666599470 |
| 0.95833333336500 | 0.13043999660500 | 0.36110999932900 |
| 0.95833333336500 | 0.13043999660500 | 0.69444333266100 |
| 0.29166666669900 | 0.13043999660500 | 0.2499999995100  |
| 0.29166666669900 | 0.13043999660500 | 0.5833333328300  |
| 0.29166666669900 | 0.13043999660500 | 0.9166666661500  |
| 0.62500000003300 | 0.13043999660500 | 0.2499999995100  |
| 0.62500000003300 | 0.13043999660500 | 0.5833333328300  |
| 0.62500000003300 | 0.13043999660500 | 0.9166666661500  |
| 0.95833333336500 | 0.13043999660500 | 0.2499999995100  |
| 0.95833333336500 | 0.13043999660500 | 0.5833333328300  |
| 0.95833333336500 | 0.13043999660500 | 0.9166666661500  |
| 0.29166666669900 | 0.13043999660500 | 0.13888999819000 |
| 0.29166666669900 | 0.13043999660500 | 0.47222333152400 |
| 0.29166666669900 | 0.13043999660500 | 0.80555666485600 |
| 0.62500000003300 | 0.13043999660500 | 0.13888999819000 |
| 0.62500000003300 | 0.13043999660500 | 0.47222333152400 |
| 0.62500000003300 | 0.13043999660500 | 0.80555666485600 |

|                  |                  |                  |
|------------------|------------------|------------------|
| 0.95833333336500 | 0.13043999660500 | 0.13888999819000 |
| 0.95833333336500 | 0.13043999660500 | 0.47222333152400 |
| 0.95833333336500 | 0.13043999660500 | 0.80555666485600 |
| 0.04166666667330 | 0.13043999660500 | 0.02777666599470 |
| 0.04166666667330 | 0.13043999660500 | 0.36110999932900 |
| 0.04166666667330 | 0.13043999660500 | 0.69444333266100 |
| 0.37500000000700 | 0.13043999660500 | 0.02777666599470 |
| 0.37500000000700 | 0.13043999660500 | 0.36110999932900 |
| 0.37500000000700 | 0.13043999660500 | 0.69444333266100 |
| 0.70833333334100 | 0.13043999660500 | 0.02777666599470 |
| 0.70833333334100 | 0.13043999660500 | 0.36110999932900 |
| 0.70833333334100 | 0.13043999660500 | 0.69444333266100 |
| 0.04166666667330 | 0.13043999660500 | 0.2499999995100  |
| 0.04166666667330 | 0.13043999660500 | 0.5833333328300  |
| 0.04166666667330 | 0.13043999660500 | 0.9166666661500  |
| 0.37500000000700 | 0.13043999660500 | 0.2499999995100  |
| 0.37500000000700 | 0.13043999660500 | 0.5833333328300  |
| 0.37500000000700 | 0.13043999660500 | 0.9166666661500  |
| 0.70833333334100 | 0.13043999660500 | 0.2499999995100  |
| 0.70833333334100 | 0.13043999660500 | 0.5833333328300  |
| 0.70833333334100 | 0.13043999660500 | 0.9166666661500  |
| 0.04166666667330 | 0.13043999660500 | 0.13888999819000 |
| 0.04166666667330 | 0.13043999660500 | 0.47222333152400 |
| 0.04166666667330 | 0.13043999660500 | 0.80555666485600 |
| 0.37500000000700 | 0.13043999660500 | 0.13888999819000 |
| 0.37500000000700 | 0.13043999660500 | 0.47222333152400 |
| 0.37500000000700 | 0.13043999660500 | 0.80555666485600 |
| 0.70833333334100 | 0.13043999660500 | 0.13888999819000 |
| 0.70833333334100 | 0.13043999660500 | 0.47222333152400 |
| 0.70833333334100 | 0.13043999660500 | 0.80555666485600 |

|                  |                  |                  |
|------------------|------------------|------------------|
| 0.2083333332800  | 0.13043999660500 | 0.02777666599470 |
| 0.2083333332800  | 0.13043999660500 | 0.36110999932900 |
| 0.2083333332800  | 0.13043999660500 | 0.69444333266100 |
| 0.5416666666100  | 0.13043999660500 | 0.02777666599470 |
| 0.5416666666100  | 0.13043999660500 | 0.36110999932900 |
| 0.5416666666100  | 0.13043999660500 | 0.69444333266100 |
| 0.8749999999500  | 0.13043999660500 | 0.02777666599470 |
| 0.8749999999500  | 0.13043999660500 | 0.36110999932900 |
| 0.8749999999500  | 0.13043999660500 | 0.69444333266100 |
| 0.2083333332800  | 0.13043999660500 | 0.2499999995100  |
| 0.2083333332800  | 0.13043999660500 | 0.5833333328300  |
| 0.2083333332800  | 0.13043999660500 | 0.9166666661500  |
| 0.5416666666100  | 0.13043999660500 | 0.2499999995100  |
| 0.5416666666100  | 0.13043999660500 | 0.5833333328300  |
| 0.5416666666100  | 0.13043999660500 | 0.9166666661500  |
| 0.8749999999500  | 0.13043999660500 | 0.2499999995100  |
| 0.8749999999500  | 0.13043999660500 | 0.5833333328300  |
| 0.8749999999500  | 0.13043999660500 | 0.9166666661500  |
| 0.2083333332800  | 0.13043999660500 | 0.13888999819000 |
| 0.2083333332800  | 0.13043999660500 | 0.47222333152400 |
| 0.2083333332800  | 0.13043999660500 | 0.80555666485600 |
| 0.5416666666100  | 0.13043999660500 | 0.13888999819000 |
| 0.5416666666100  | 0.13043999660500 | 0.47222333152400 |
| 0.5416666666100  | 0.13043999660500 | 0.80555666485600 |
| 0.8749999999500  | 0.13043999660500 | 0.13888999819000 |
| 0.8749999999500  | 0.13043999660500 | 0.47222333152400 |
| 0.8749999999500  | 0.13043999660500 | 0.80555666485600 |
| 0.00020893765751 | 0.19638156401700 | 0.08248021707730 |
| 0.00020895697584 | 0.19638187910100 | 0.41581287900200 |
| 0.00020895496798 | 0.19638206395000 | 0.74914681624200 |



|                  |                  |                  |
|------------------|------------------|------------------|
| 0.33354232648000 | 0.19638151184500 | 0.08248022992050 |
| 0.33354234448200 | 0.19638182549700 | 0.41581289187400 |
| 0.33354233718700 | 0.19638201969600 | 0.74914682785700 |
| 0.66687551275700 | 0.19638152573900 | 0.08248022842470 |
| 0.66687552782500 | 0.19638184181000 | 0.41581288979300 |
| 0.66687553571000 | 0.19638203264400 | 0.74914682763600 |
| 0.33324769133300 | 0.19737899219900 | 0.30489822430800 |
| 0.33324771730800 | 0.19737929579200 | 0.63823195356900 |
| 0.33324773665900 | 0.19737915428100 | 0.97156595802600 |
| 0.66658087540600 | 0.19737900545300 | 0.30489821376200 |
| 0.66658090811300 | 0.19737930837100 | 0.63823194762500 |
| 0.66658092494500 | 0.19737916566800 | 0.97156595003000 |
| 0.99991430244700 | 0.19737903773700 | 0.30489820754000 |
| 0.99991433254500 | 0.19737933828900 | 0.63823194558000 |
| 0.99991434793900 | 0.19737919939700 | 0.97156594161500 |
| 0.33330032731000 | 0.19365727733300 | 0.19311940779000 |
| 0.33330036898000 | 0.19365768662700 | 0.52645282659100 |
| 0.33330036969000 | 0.19365781408400 | 0.85978668955100 |
| 0.66663352150000 | 0.19365728852000 | 0.19311941105300 |
| 0.66663355992900 | 0.19365769950100 | 0.52645283224600 |
| 0.66663357295600 | 0.19365782420300 | 0.85978669408400 |
| 0.99996694265900 | 0.19365732094300 | 0.19311941799200 |
| 0.99996698550900 | 0.19365773176300 | 0.52645284012600 |
| 0.99996698845500 | 0.19365785403900 | 0.85978669544100 |
| 0.16685330609800 | 0.20005535875700 | 0.08553656185720 |
| 0.16685331060100 | 0.20005548666100 | 0.41886933151600 |
| 0.16685330120300 | 0.20005555004900 | 0.75220308440900 |
| 0.50018658572400 | 0.20005531132300 | 0.08553654355590 |
| 0.50018658681300 | 0.20005543832400 | 0.41886931391700 |
| 0.50018658144000 | 0.20005551501600 | 0.75220307147600 |

|                  |                  |                  |
|------------------|------------------|------------------|
| 0.83351990068300 | 0.20005537463000 | 0.08553656355970 |
| 0.83351990459700 | 0.20005550255900 | 0.41886933221600 |
| 0.83351989869400 | 0.20005556524000 | 0.75220308743600 |
| 0.16663365000000 | 0.19770573384800 | 0.30506013121200 |
| 0.16663361391200 | 0.19770599994700 | 0.63839377752900 |
| 0.16663359819000 | 0.19770591029800 | 0.97172781278900 |
| 0.49996694321800 | 0.19770566768700 | 0.30506015614400 |
| 0.49996690876300 | 0.19770594175900 | 0.63839379504600 |
| 0.49996689303100 | 0.19770584490200 | 0.97172783940200 |
| 0.83330025985200 | 0.19770574546400 | 0.30506012631000 |
| 0.83330022577700 | 0.19770601245500 | 0.63839377651000 |
| 0.83330020783300 | 0.19770592128800 | 0.97172781093000 |
| 0.16625275563400 | 0.19381098354900 | 0.19239860652300 |
| 0.16625271617700 | 0.19381125261000 | 0.52573200266100 |
| 0.16625270653600 | 0.19381137841700 | 0.85906592801900 |
| 0.49958604167000 | 0.19381094275200 | 0.19239860451400 |
| 0.49958600052200 | 0.19381120901600 | 0.52573199707300 |
| 0.49958599307300 | 0.19381134199500 | 0.85906592916100 |
| 0.83291935443200 | 0.19381099195700 | 0.19239860606000 |
| 0.83291931555100 | 0.19381126255600 | 0.52573200455800 |
| 0.83291930660400 | 0.19381138634300 | 0.85906593010200 |
| 0.08379957035350 | 0.19866603416200 | 0.08435613317970 |
| 0.08379959559830 | 0.19866627167900 | 0.41768884931300 |
| 0.08379949505090 | 0.19866643278800 | 0.75102273250100 |
| 0.41713292405500 | 0.19866596953500 | 0.08435613599830 |
| 0.41713294819000 | 0.19866620539400 | 0.41768885226400 |
| 0.41713285043900 | 0.19866637957300 | 0.75102273692900 |
| 0.75046615643800 | 0.19866602811700 | 0.08435614299580 |
| 0.75046617833300 | 0.19866626677800 | 0.41768885775500 |
| 0.75046608492300 | 0.19866642822500 | 0.75102274350600 |

|                  |                  |                  |
|------------------|------------------|------------------|
| 0.08344940333170 | 0.19757506668300 | 0.30479680339600 |
| 0.08344939318250 | 0.19757533070500 | 0.63813049648500 |
| 0.08344938344460 | 0.19757522535400 | 0.97146447430700 |
| 0.41678275540100 | 0.19757500448300 | 0.30479682451000 |
| 0.41678274399400 | 0.19757527484600 | 0.63813050802800 |
| 0.41678273643600 | 0.19757516396000 | 0.97146449612900 |
| 0.75011599266900 | 0.19757506474400 | 0.30479680068900 |
| 0.75011598452900 | 0.19757532987600 | 0.63813049537200 |
| 0.75011597429800 | 0.19757522180800 | 0.97146447364700 |
| 0.08381422392690 | 0.19555810816500 | 0.19301076565500 |
| 0.08381429885630 | 0.19555843889800 | 0.52634412745600 |
| 0.08381422727060 | 0.19555857098800 | 0.85967806441800 |
| 0.41714756512700 | 0.19555805512000 | 0.19301076298200 |
| 0.41714763971400 | 0.19555838322800 | 0.52634412059000 |
| 0.41714757120400 | 0.19555852296700 | 0.85967806617500 |
| 0.75048081234700 | 0.19555810163400 | 0.19301075650900 |
| 0.75048088520000 | 0.19555843436300 | 0.52634411929600 |
| 0.75048081887600 | 0.19555856360300 | 0.85967805977900 |
| 0.25006563336100 | 0.19631758174100 | 0.08245874261690 |
| 0.25006559359400 | 0.19631781221600 | 0.41579140188200 |
| 0.25006569402200 | 0.19631800461900 | 0.74912532191500 |
| 0.58339884002000 | 0.19631754689200 | 0.08245873455870 |
| 0.58339879580900 | 0.19631777820600 | 0.41579139389600 |
| 0.58339890609000 | 0.19631797869300 | 0.74912531567800 |
| 0.91673222846700 | 0.19631760917100 | 0.08245872849090 |
| 0.91673219070100 | 0.19631784107900 | 0.41579138717600 |
| 0.91673229770600 | 0.19631803010400 | 0.74912530921600 |
| 0.25011106015400 | 0.19764400474100 | 0.30438633357400 |
| 0.25011107378200 | 0.19764429358200 | 0.63772005401200 |
| 0.25011108365700 | 0.19764418753900 | 0.97105405989900 |

|                  |                  |                  |
|------------------|------------------|------------------|
| 0.58344427369700 | 0.19764396439700 | 0.30438634206100 |
| 0.58344429279900 | 0.19764425809300 | 0.63772005865300 |
| 0.58344430076800 | 0.19764414712800 | 0.97105407193800 |
| 0.91677766521800 | 0.19764402845300 | 0.30438632497400 |
| 0.91677768286900 | 0.19764431699300 | 0.63772005125400 |
| 0.91677768875700 | 0.19764421113000 | 0.97105405374600 |
| 0.25002643153600 | 0.19639621849100 | 0.19351849350500 |
| 0.25002636585600 | 0.19639659662600 | 0.52685182806600 |
| 0.25002642437900 | 0.19639673543000 | 0.86018574384100 |
| 0.58335965693800 | 0.19639618758500 | 0.19351850671300 |
| 0.58335958869500 | 0.19639656439100 | 0.52685183984900 |
| 0.58335965295700 | 0.19639670936400 | 0.86018575953500 |
| 0.91669303421200 | 0.19639624594800 | 0.19351850275900 |
| 0.91669297070300 | 0.19639662573500 | 0.52685183957800 |
| 0.91669303185100 | 0.19639676227000 | 0.86018575196300 |
| 0.12517755304400 | 0.27107386669100 | 0.03211430629790 |
| 0.12517752694200 | 0.27107425959000 | 0.36544681185100 |
| 0.12517747486300 | 0.27107463878800 | 0.69878049103500 |
| 0.45851088636600 | 0.27107371252900 | 0.03211431363410 |
| 0.45851085859700 | 0.27107410350100 | 0.36544681930500 |
| 0.45851080871300 | 0.27107450164600 | 0.69878049816300 |
| 0.79184415771700 | 0.27107387796600 | 0.03211431120060 |
| 0.79184412942900 | 0.27107427468900 | 0.36544681452600 |
| 0.79184408078100 | 0.27107465354600 | 0.69878049635800 |
| 0.12451595345100 | 0.26862588937100 | 0.25090595558200 |
| 0.12451598212500 | 0.26862661749600 | 0.58423950632500 |
| 0.12451594729100 | 0.26862630303400 | 0.91757343608600 |
| 0.45784927180600 | 0.26862576654500 | 0.25090595246000 |
| 0.45784929997300 | 0.26862649808900 | 0.58423949706400 |
| 0.45784926719500 | 0.26862618365800 | 0.91757343465500 |

|                  |                  |                  |
|------------------|------------------|------------------|
| 0.79118255956700 | 0.26862589840700 | 0.25090595211800 |
| 0.79118258857800 | 0.26862663001900 | 0.58423950535700 |
| 0.79118255408200 | 0.26862631034700 | 0.91757343492700 |
| 0.12601379959600 | 0.27254130227000 | 0.14243768603700 |
| 0.12601383385800 | 0.27254214504300 | 0.47577093272200 |
| 0.12601371586800 | 0.27254204589200 | 0.80910487460800 |
| 0.45934711251900 | 0.27254117207000 | 0.14243765298600 |
| 0.45934714550000 | 0.27254201185500 | 0.47577089820800 |
| 0.45934703348200 | 0.27254192662900 | 0.80910484405200 |
| 0.79268039552500 | 0.27254129983200 | 0.14243767935300 |
| 0.79268042768800 | 0.27254214769000 | 0.47577092805500 |
| 0.79268031358800 | 0.27254204522000 | 0.80910487144300 |
| 0.29159703583000 | 0.27151055206800 | 0.03109509152370 |
| 0.29159699626900 | 0.27151106730400 | 0.36442763303000 |
| 0.29159703617800 | 0.27151146462900 | 0.69776140310600 |
| 0.62493023692400 | 0.27151051435100 | 0.03109508718650 |
| 0.62493019408400 | 0.27151103378100 | 0.36442762783400 |
| 0.62493024401500 | 0.27151143558700 | 0.69776139909400 |
| 0.95826364244300 | 0.27151063859500 | 0.03109508891680 |
| 0.95826360392000 | 0.27151115717500 | 0.36442762963300 |
| 0.95826364916400 | 0.27151154477800 | 0.69776140333300 |
| 0.29197934714000 | 0.27022050140100 | 0.25061391661100 |
| 0.29197941091700 | 0.27022132146100 | 0.58394748289600 |
| 0.29197942741100 | 0.27022099133500 | 0.91728139401700 |
| 0.62531255660300 | 0.27022046390500 | 0.25061391524500 |
| 0.62531262158000 | 0.27022128665000 | 0.58394748203200 |
| 0.62531264146500 | 0.27022095516900 | 0.91728139495700 |
| 0.95864596191300 | 0.27022056538900 | 0.25061392199900 |
| 0.95864602845200 | 0.27022138648100 | 0.58394749299700 |
| 0.95864604392400 | 0.27022105432700 | 0.91728139876400 |

|                  |                  |                  |
|------------------|------------------|------------------|
| 0.29307439467300 | 0.27168806466200 | 0.14288458813800 |
| 0.29307438583000 | 0.27168911232300 | 0.47621777038000 |
| 0.29307445059600 | 0.27168910091400 | 0.80955161585000 |
| 0.62640760798500 | 0.27168804118200 | 0.14288458668800 |
| 0.62640759583700 | 0.27168909211100 | 0.47621777013700 |
| 0.62640767062300 | 0.27168908259600 | 0.80955161582800 |
| 0.95974100678300 | 0.27168816141400 | 0.14288460280600 |
| 0.95974099958600 | 0.27168921302300 | 0.47621778714400 |
| 0.95974106841700 | 0.27168919049400 | 0.80955162901500 |
| 0.04192427081410 | 0.27144655625100 | 0.03136786745130 |
| 0.04192429456250 | 0.27144705949700 | 0.36470043094500 |
| 0.04192426458810 | 0.27144743382000 | 0.69803419247200 |
| 0.37525764189900 | 0.27144641980100 | 0.03136786778230 |
| 0.37525766475400 | 0.27144692052600 | 0.36470043141100 |
| 0.37525763306500 | 0.27144731271800 | 0.69803418977700 |
| 0.70859085649100 | 0.27144651493100 | 0.03136787049530 |
| 0.70859087733000 | 0.27144702143500 | 0.36470043337200 |
| 0.70859085324300 | 0.27144740049000 | 0.69803419512200 |
| 0.04033230600080 | 0.26913821408900 | 0.25110814714800 |
| 0.04033228749560 | 0.26913895059600 | 0.58444172123700 |
| 0.04033229352760 | 0.26913863482500 | 0.91777563002600 |
| 0.37366567678800 | 0.26913811231100 | 0.25110814053300 |
| 0.37366565702000 | 0.26913885044800 | 0.58444170867600 |
| 0.37366566447400 | 0.26913853583100 | 0.91777562540400 |
| 0.70699889496600 | 0.26913818322700 | 0.25110814097700 |
| 0.70699887559500 | 0.26913892250800 | 0.58444171481100 |
| 0.70699888574100 | 0.26913860237100 | 0.91777562679400 |
| 0.04047730932170 | 0.27132284642400 | 0.14343734510500 |
| 0.04047735069810 | 0.27132384640800 | 0.47677052972800 |
| 0.04047726364060 | 0.27132382547300 | 0.81010438392700 |

|                  |                  |                  |
|------------------|------------------|------------------|
| 0.37381067448100 | 0.27132271617700 | 0.14343732711100 |
| 0.37381071532600 | 0.27132371261700 | 0.47677050979200 |
| 0.37381062894700 | 0.27132370749900 | 0.81010436867800 |
| 0.70714389789800 | 0.27132279315200 | 0.14343733614900 |
| 0.70714393570700 | 0.27132379679100 | 0.47677052066700 |
| 0.70714385683400 | 0.27132377809300 | 0.81010437857300 |
| 0.20842294502900 | 0.27150191090600 | 0.03160532596760 |
| 0.20842299050700 | 0.27150231712300 | 0.36493782081400 |
| 0.20842301790400 | 0.27150272777700 | 0.69827151799200 |
| 0.54175619162400 | 0.27150177620400 | 0.03160532680860 |
| 0.54175623384600 | 0.27150218300900 | 0.36493782113100 |
| 0.54175626565000 | 0.27150261004800 | 0.69827151887800 |
| 0.87508955294500 | 0.27150194956600 | 0.03160532421800 |
| 0.87508959942900 | 0.27150235997500 | 0.36493781670400 |
| 0.87508963025000 | 0.27150276823100 | 0.69827151710100 |
| 0.20619530423000 | 0.26959856132300 | 0.25041763511800 |
| 0.20619520023000 | 0.26959932330300 | 0.58375117770000 |
| 0.20619522971500 | 0.26959903611400 | 0.91708510768900 |
| 0.53952857761400 | 0.26959845325300 | 0.25041763672700 |
| 0.53952847362300 | 0.26959921900900 | 0.58375117521300 |
| 0.53952850378200 | 0.26959893196300 | 0.91708511144300 |
| 0.87286191351400 | 0.26959859076300 | 0.25041763748600 |
| 0.87286181084200 | 0.26959935589100 | 0.58375118366500 |
| 0.87286183983900 | 0.26959906532700 | 0.91708511155200 |
| 0.20657877494500 | 0.26253892295400 | 0.13552723411300 |
| 0.20657870246900 | 0.26253958883300 | 0.46886035915700 |
| 0.20657881564100 | 0.26253942012200 | 0.80219422532400 |
| 0.53991203120500 | 0.26253885989700 | 0.13552722378100 |
| 0.53991195544600 | 0.26253952511800 | 0.46886034865900 |
| 0.53991207058400 | 0.26253936583700 | 0.80219421633100 |

|                  |                  |                  |
|------------------|------------------|------------------|
| 0.87324536903000 | 0.26253895452900 | 0.13552723296600 |
| 0.87324529840000 | 0.26253962340800 | 0.46886035984000 |
| 0.87324541513300 | 0.26253945160400 | 0.80219422581800 |
| 0.19086939787300 | 0.38019351516100 | 0.22725975200400 |
| 0.19086944556700 | 0.38019365474300 | 0.56059307900700 |
| 0.19086934480100 | 0.38019366610900 | 0.89392655707100 |
| 0.52420270809200 | 0.38019350364900 | 0.22725975198700 |
| 0.52420275643400 | 0.38019364314900 | 0.56059307842700 |
| 0.52420265576600 | 0.38019365481700 | 0.89392655707700 |
| 0.85753605770400 | 0.38019351881000 | 0.22725975234300 |
| 0.85753610603800 | 0.38019365873700 | 0.56059307968700 |
| 0.85753600514700 | 0.38019366951500 | 0.89392655746500 |
| 0.21488011560300 | 0.29887448370400 | 0.15520936431900 |
| 0.21488014619800 | 0.29887470563100 | 0.48854272397900 |
| 0.21488017232600 | 0.29887483903900 | 0.82187620536400 |
| 0.54821342924700 | 0.29887445063600 | 0.15520935223700 |
| 0.54821345940600 | 0.29887467211800 | 0.48854271168500 |
| 0.54821348603500 | 0.29887480810500 | 0.82187619397100 |
| 0.88154677296700 | 0.29887449799300 | 0.15520936932000 |
| 0.88154680418900 | 0.29887472157500 | 0.48854272987500 |
| 0.88154683044400 | 0.29887485319300 | 0.82187621060300 |
| 0.22334263679000 | 0.34113014865500 | 0.23755700480200 |
| 0.22334261483500 | 0.34113041408100 | 0.57089029069000 |
| 0.22334263540800 | 0.34113029551500 | 0.90422377754100 |
| 0.55667595843200 | 0.34113014881800 | 0.23755700117800 |
| 0.55667593664400 | 0.34113041319200 | 0.57089028710000 |
| 0.55667595723200 | 0.34113029611800 | 0.90422377411900 |
| 0.89000929588800 | 0.34113014303200 | 0.23755700747100 |
| 0.89000927429800 | 0.34113040767200 | 0.57089029423200 |
| 0.89000929472800 | 0.34113028943200 | 0.90422378048900 |



|                  |                  |                  |
|------------------|------------------|------------------|
| 0.16463133364700 | 0.36493901099400 | 0.24869646292100 |
| 0.16463132125800 | 0.36493915869800 | 0.58202981218800 |
| 0.16463133432500 | 0.36493916196100 | 0.91536327742300 |
| 0.49796466236900 | 0.36493899839800 | 0.24869646185800 |
| 0.49796464999700 | 0.36493914627400 | 0.58202981055100 |
| 0.49796466323600 | 0.36493914953500 | 0.91536327661800 |
| 0.83129799163500 | 0.36493901308900 | 0.24869646277400 |
| 0.83129797941300 | 0.36493916094900 | 0.58202981249100 |
| 0.83129799254700 | 0.36493916377500 | 0.91536327754400 |
| 0.16383691980500 | 0.35794575067800 | 0.21450833281200 |
| 0.16383694194400 | 0.35794597053100 | 0.54784171044300 |
| 0.16383693138200 | 0.35794605245400 | 0.88117519485400 |
| 0.49717025312900 | 0.35794575711700 | 0.21450834408300 |
| 0.49717027483400 | 0.35794597503600 | 0.54784172014100 |
| 0.49717026480100 | 0.35794605884000 | 0.88117520591200 |
| 0.83050357686100 | 0.35794574864000 | 0.21450833051400 |
| 0.83050359882900 | 0.35794596810700 | 0.54784170796500 |
| 0.83050358857100 | 0.35794604972500 | 0.88117519237200 |
| 0.17780371569500 | 0.32784578920000 | 0.27231580696100 |
| 0.17780368989100 | 0.32784599147900 | 0.60564915957900 |
| 0.17780368921700 | 0.32784590564000 | 0.93898260878800 |
| 0.51113702815000 | 0.32784578929500 | 0.27231580511200 |
| 0.51113700302600 | 0.32784599175300 | 0.60564915728500 |
| 0.51113700198100 | 0.32784590600700 | 0.93898260705900 |
| 0.84447037454700 | 0.32784579208700 | 0.27231580738000 |
| 0.84447034971300 | 0.32784599360600 | 0.60564916054700 |
| 0.84447034835000 | 0.32784590810500 | 0.93898260943800 |
| 0.14569231169100 | 0.32653053330600 | 0.26872830969400 |
| 0.14569233046300 | 0.32653075150700 | 0.60206166472800 |
| 0.14569237205300 | 0.32653072192200 | 0.93539513324700 |

|                  |                  |                  |
|------------------|------------------|------------------|
| 0.47902565077600 | 0.32653052504900 | 0.26872831004800 |
| 0.47902566953900 | 0.32653074406100 | 0.60206166439800 |
| 0.47902571149000 | 0.32653071433500 | 0.93539513374800 |
| 0.81235896652300 | 0.32653053208700 | 0.26872830901400 |
| 0.81235898527900 | 0.32653075026100 | 0.60206166444600 |
| 0.81235902735200 | 0.32653072080400 | 0.93539513289800 |
| 0.23381000884300 | 0.39035468132000 | 0.23946858847000 |
| 0.23381010841400 | 0.39035500184100 | 0.57280201861200 |
| 0.23381011073000 | 0.39035492750200 | 0.90613543947500 |
| 0.56714332294300 | 0.39035465597800 | 0.23946857971900 |
| 0.56714342231600 | 0.39035497631300 | 0.57280200945300 |
| 0.56714342515700 | 0.39035490261700 | 0.90613543099900 |
| 0.90047667403400 | 0.39035469573200 | 0.23946859293500 |
| 0.90047677434300 | 0.39035501725100 | 0.57280202390500 |
| 0.90047677595800 | 0.39035494147300 | 0.90613544395000 |
| 0.14577366876200 | 0.29818075466300 | 0.18197814872000 |
| 0.14577358953800 | 0.29818086344100 | 0.51531143281600 |
| 0.14577372950600 | 0.29818095360500 | 0.84864503963100 |
| 0.47910700872200 | 0.29818074284100 | 0.18197815091000 |
| 0.47910692877800 | 0.29818085085000 | 0.51531143386400 |
| 0.47910706921700 | 0.29818094231100 | 0.84864504136100 |
| 0.81244032192000 | 0.29818075497300 | 0.18197814617300 |
| 0.81244024224400 | 0.29818086431100 | 0.51531143057100 |
| 0.81244038288100 | 0.29818095391800 | 0.84864503740700 |
| 0.17789086570000 | 0.30220312734600 | 0.18336159590900 |
| 0.17789085672500 | 0.30220325727900 | 0.51669493030100 |
| 0.17789078434100 | 0.30220327317800 | 0.85002846947600 |
| 0.51122416964300 | 0.30220311645100 | 0.18336160763900 |
| 0.51122416262400 | 0.30220324583500 | 0.51669493990000 |
| 0.51122408994100 | 0.30220326270200 | 0.85002847999100 |

|                  |                  |                  |
|------------------|------------------|------------------|
| 0.84455752451700 | 0.30220313017800 | 0.18336159599000 |
| 0.84455751648000 | 0.30220326064200 | 0.51669493029500 |
| 0.84455744457900 | 0.30220327589700 | 0.85002846899900 |
| 0.19117436574200 | 0.88034436411700 | 0.22661026281000 |
| 0.19117441302900 | 0.88034422545800 | 0.55994359015800 |
| 0.19117431466100 | 0.88034421360000 | 0.89327706593800 |
| 0.52450767591000 | 0.88034437538700 | 0.22661026260400 |
| 0.52450772383300 | 0.88034423683300 | 0.55994358941100 |
| 0.52450762556600 | 0.88034422466000 | 0.89327706576900 |
| 0.85784102563700 | 0.88034436048000 | 0.22661026315600 |
| 0.85784107355200 | 0.88034422147300 | 0.55994359084500 |
| 0.85784097505900 | 0.88034421020200 | 0.89327706633900 |
| 0.21490855682000 | 0.96197405285100 | 0.15521661518400 |
| 0.21490858716800 | 0.96197383055600 | 0.48854997489400 |
| 0.21490861292400 | 0.96197369821300 | 0.82188345509400 |
| 0.54824187055700 | 0.96197408582400 | 0.15521660321300 |
| 0.54824190047200 | 0.96197386396400 | 0.48854996272300 |
| 0.54824192672900 | 0.96197372904100 | 0.82188344381800 |
| 0.88157521421100 | 0.96197403858900 | 0.15521662018400 |
| 0.88157524517500 | 0.96197381464700 | 0.48854998077000 |
| 0.88157527105100 | 0.96197368409200 | 0.82188346031900 |
| 0.22347035034900 | 0.91984683404900 | 0.23753391689000 |
| 0.22347032932300 | 0.91984657027400 | 0.57086720332800 |
| 0.22347034908600 | 0.91984668801500 | 0.90420068989500 |
| 0.55680367210900 | 0.91984683390400 | 0.23753391330400 |
| 0.55680365123600 | 0.91984657122500 | 0.57086719978900 |
| 0.55680367102500 | 0.91984668744400 | 0.90420068651800 |
| 0.89013700939500 | 0.91984683976600 | 0.23753391957300 |
| 0.89013698871500 | 0.91984657674200 | 0.57086720686800 |
| 0.89013700833800 | 0.91984669415600 | 0.90420069284100 |

|                  |                  |                  |
|------------------|------------------|------------------|
| 0.16464943466700 | 0.89542050878200 | 0.24773044233900 |
| 0.16464942152700 | 0.89542036104400 | 0.58106378888100 |
| 0.16464943626100 | 0.89542035532700 | 0.91439725767600 |
| 0.49798276342200 | 0.89542052146600 | 0.24773044146300 |
| 0.49798275029000 | 0.89542037359100 | 0.58106378743300 |
| 0.49798276519700 | 0.89542036784900 | 0.91439725705600 |
| 0.83131609267300 | 0.89542050668200 | 0.24773044218500 |
| 0.83131607968400 | 0.89542035877800 | 0.58106378916700 |
| 0.83131609448600 | 0.89542035350800 | 0.91439725778200 |
| 0.16427305037300 | 0.90248664415400 | 0.21356347090800 |
| 0.16427307114100 | 0.90248642750500 | 0.54689684543900 |
| 0.16427306097800 | 0.90248634237800 | 0.88023033192900 |
| 0.49760638350200 | 0.90248663774700 | 0.21356348208800 |
| 0.49760640384900 | 0.90248642304700 | 0.54689685506300 |
| 0.49760639420000 | 0.90248633604400 | 0.88023034289300 |
| 0.83093970745900 | 0.90248664617600 | 0.21356346862300 |
| 0.83093972805500 | 0.90248642991500 | 0.54689684296800 |
| 0.83093971819200 | 0.90248634510800 | 0.88023032944600 |
| 0.17761886953300 | 0.93257556633300 | 0.27133188430800 |
| 0.17761884341000 | 0.93257536358000 | 0.60466523516400 |
| 0.17761884431600 | 0.93257545050700 | 0.93799868776100 |
| 0.51095218222600 | 0.93257556633600 | 0.27133188243100 |
| 0.51095215677400 | 0.93257536346100 | 0.60466523284100 |
| 0.51095215732500 | 0.93257545027400 | 0.93799868601000 |
| 0.84428552837300 | 0.93257556343500 | 0.27133188471500 |
| 0.84428550317600 | 0.93257536139400 | 0.60466523611800 |
| 0.84428550342300 | 0.93257544801800 | 0.93799868839300 |
| 0.14551529587100 | 0.93389645582400 | 0.26764903226700 |
| 0.14551531143000 | 0.93389624108000 | 0.60098238497700 |
| 0.14551535823600 | 0.93389626263900 | 0.93431585805400 |

|                  |                  |                  |
|------------------|------------------|------------------|
| 0.47884863480900 | 0.93389646436800 | 0.26764903273600 |
| 0.47884865032500 | 0.93389624890600 | 0.60098238475300 |
| 0.47884869749900 | 0.93389627056200 | 0.93431585867200 |
| 0.81218195079400 | 0.93389645695800 | 0.26764903159200 |
| 0.81218196631400 | 0.93389624224300 | 0.60098238469300 |
| 0.81218201359100 | 0.93389626370300 | 0.93431585770100 |
| 0.23411807559800 | 0.87075223396000 | 0.23955794723500 |
| 0.23411817534400 | 0.87075191467900 | 0.57289137823800 |
| 0.23411817744200 | 0.87075198950700 | 0.90622479846900 |
| 0.56745138973300 | 0.87075225910700 | 0.23955793840600 |
| 0.56745148926200 | 0.87075194003900 | 0.57289136899100 |
| 0.56745149189900 | 0.87075201420500 | 0.90622478991900 |
| 0.90078474080000 | 0.87075221966400 | 0.23955795174400 |
| 0.90078484127900 | 0.87075189937800 | 0.57289138357500 |
| 0.90078484266600 | 0.87075197564600 | 0.90622480297500 |
| 0.14580844046200 | 0.96259354647100 | 0.18187570108500 |
| 0.14580836119100 | 0.96259343676700 | 0.51520898577600 |
| 0.14580850022300 | 0.96259334674000 | 0.84854258989500 |
| 0.47914178036100 | 0.96259355838500 | 0.18187570324500 |
| 0.47914170037800 | 0.96259344945500 | 0.51520898682100 |
| 0.47914183987400 | 0.96259335811900 | 0.84854259161700 |
| 0.81247509364200 | 0.96259354613700 | 0.18187569855900 |
| 0.81247501390400 | 0.96259343587500 | 0.51520898353500 |
| 0.81247515359700 | 0.96259334641600 | 0.84854258766900 |
| 0.17793614252700 | 0.95890570652900 | 0.18320235187000 |
| 0.17793613212300 | 0.95890557544600 | 0.51653568762700 |
| 0.17793606075200 | 0.95890555802900 | 0.84986922552700 |
| 0.51126944668200 | 0.95890571706900 | 0.18320236356100 |
| 0.51126943820700 | 0.95890558658400 | 0.51653569721100 |
| 0.51126936651900 | 0.95890556817000 | 0.84986923604000 |

|                  |                  |                  |
|------------------|------------------|------------------|
| 0.84460280134200 | 0.95890570370300 | 0.18320235196700 |
| 0.84460279184900 | 0.95890557210300 | 0.51653568763900 |
| 0.84460272095300 | 0.95890555534100 | 0.84986922507000 |
| 0.03232896310290 | 0.37964968983200 | 0.22677161975200 |
| 0.03232900838750 | 0.37964983208900 | 0.56010495366600 |
| 0.03232893092540 | 0.37964983355900 | 0.89343841157500 |
| 0.36566228647800 | 0.37964967905000 | 0.22677161753000 |
| 0.36566233178500 | 0.37964982120800 | 0.56010495081600 |
| 0.36566225451700 | 0.37964982339500 | 0.89343840959500 |
| 0.69899560870300 | 0.37964968604600 | 0.22677161800900 |
| 0.69899565423600 | 0.37964982839900 | 0.56010495175200 |
| 0.69899557740800 | 0.37964982983700 | 0.89343841011400 |
| 0.06227116352480 | 0.33965974035500 | 0.24097255740800 |
| 0.06227115425250 | 0.33966000025300 | 0.57430584752300 |
| 0.06227116559350 | 0.33965984990600 | 0.90763934145700 |
| 0.39560449892000 | 0.33965974942600 | 0.24097255141900 |
| 0.39560448947300 | 0.33966000957300 | 0.57430584074900 |
| 0.39560450104100 | 0.33965986008800 | 0.90763933549000 |
| 0.72893781986600 | 0.33965974646900 | 0.24097255462500 |
| 0.72893781057400 | 0.33966000561100 | 0.57430584506100 |
| 0.72893782227400 | 0.33965985565900 | 0.90763933910800 |
| 0.00313655961567 | 0.36721566660300 | 0.24433972527800 |
| 0.00313654670626 | 0.36721581669800 | 0.57767308050400 |
| 0.00313657112398 | 0.36721581876400 | 0.91100653739500 |
| 0.33646990004300 | 0.36721565946700 | 0.24433972213100 |
| 0.33646988688600 | 0.36721580970000 | 0.57767307670800 |
| 0.33646991149600 | 0.36721581221800 | 0.91100653442600 |
| 0.66980321887600 | 0.36721566126300 | 0.24433972255500 |
| 0.66980320586800 | 0.36721581137600 | 0.57767307754100 |
| 0.66980323076300 | 0.36721581359500 | 0.91100653506900 |

|                  |                  |                  |
|------------------|------------------|------------------|
| 0.00681279937188 | 0.35670135726700 | 0.21135185359600 |
| 0.00681281802806 | 0.35670157995300 | 0.54468521710700 |
| 0.00681280262202 | 0.35670167172400 | 0.87801869273700 |
| 0.34014614182700 | 0.35670136824700 | 0.21135186447500 |
| 0.34014616036800 | 0.35670159038700 | 0.54468522727400 |
| 0.34014614503200 | 0.35670168398500 | 0.87801870411900 |
| 0.67347945997000 | 0.35670136525800 | 0.21135186157500 |
| 0.67347947823500 | 0.35670158666300 | 0.54468522414600 |
| 0.67347946357300 | 0.35670168000600 | 0.87801870092900 |
| 0.01253040616890 | 0.33005245446300 | 0.27003382480800 |
| 0.01253039911820 | 0.33005264670000 | 0.60336717961900 |
| 0.01253040478870 | 0.33005254824500 | 0.93670062417800 |
| 0.34586373466400 | 0.33005245601500 | 0.27003382185100 |
| 0.34586372694500 | 0.33005264948500 | 0.60336717585000 |
| 0.34586373312900 | 0.33005255046700 | 0.93670062131700 |
| 0.67919705196200 | 0.33005246221300 | 0.27003382214800 |
| 0.67919704553000 | 0.33005265417900 | 0.60336717678300 |
| 0.67919705117000 | 0.33005255566700 | 0.93670062185900 |
| 0.31410333836900 | 0.33148307480000 | 0.26525599832000 |
| 0.31410337218800 | 0.33148330313100 | 0.59858935051300 |
| 0.31410341362600 | 0.33148326456900 | 0.93192281695000 |
| 0.64743665169000 | 0.33148306909000 | 0.26525599725700 |
| 0.64743668583700 | 0.33148329741100 | 0.59858934976000 |
| 0.64743672768000 | 0.33148325884400 | 0.93192281614200 |
| 0.98076998722900 | 0.33148307412100 | 0.26525599711300 |
| 0.98077002134500 | 0.33148330195000 | 0.59858935008100 |
| 0.98077006261300 | 0.33148326343600 | 0.93192281565900 |
| 0.07279806888910 | 0.38831473880200 | 0.24547211039500 |
| 0.07279815750380 | 0.38831504879300 | 0.57880556212000 |
| 0.07279815828280 | 0.38831496134000 | 0.91213898483100 |

|                  |                  |                  |
|------------------|------------------|------------------|
| 0.40613139105000 | 0.38831470371600 | 0.24547209599100 |
| 0.40613147917400 | 0.38831501339700 | 0.57880554679500 |
| 0.40613148100400 | 0.38831492757300 | 0.91213897116300 |
| 0.73946472227900 | 0.38831472840900 | 0.24547210408600 |
| 0.73946481105100 | 0.38831503894300 | 0.57880555603100 |
| 0.73946481204100 | 0.38831495105600 | 0.91213897896800 |
| 0.31793497407300 | 0.30093532068900 | 0.18296632798400 |
| 0.31793493563600 | 0.30093547195500 | 0.51629962937400 |
| 0.31793505665600 | 0.30093550837900 | 0.84963317324100 |
| 0.65126828476600 | 0.30093532007100 | 0.18296632413500 |
| 0.65126824471500 | 0.30093547143200 | 0.51629962486500 |
| 0.65126836843500 | 0.30093550773400 | 0.84963316975300 |
| 0.98460161824700 | 0.30093532916300 | 0.18296632094500 |
| 0.98460157960600 | 0.30093548074000 | 0.51629962256100 |
| 0.98460170080800 | 0.30093551569700 | 0.84963316535300 |
| 0.01667192598930 | 0.29707461141400 | 0.18192470887300 |
| 0.01667197850940 | 0.29707474968800 | 0.51525800315200 |
| 0.01667185819730 | 0.29707482206100 | 0.84859156339500 |
| 0.35000525418900 | 0.29707460270700 | 0.18192471266100 |
| 0.35000530704200 | 0.29707474044100 | 0.51525800600900 |
| 0.35000518597000 | 0.29707481483800 | 0.84859156813700 |
| 0.68333857015100 | 0.29707460883800 | 0.18192471506300 |
| 0.68333862265000 | 0.29707474712500 | 0.51525800886500 |
| 0.68333850341900 | 0.29707482002800 | 0.84859156985000 |
| 0.03217599827910 | 0.88252096749900 | 0.22547048136600 |
| 0.03217604342280 | 0.88252082196500 | 0.55880381457100 |
| 0.03217596910040 | 0.88252081815300 | 0.89213727299200 |
| 0.36550932180600 | 0.88252097843100 | 0.22547047942900 |
| 0.36550936698000 | 0.88252083303000 | 0.55880381201200 |
| 0.36550929282500 | 0.88252082846600 | 0.89213727129500 |



|                  |                  |                  |
|------------------|------------------|------------------|
| 0.69884264390500 | 0.88252097136700 | 0.22547047985800 |
| 0.69884268928400 | 0.88252082575300 | 0.55880381289100 |
| 0.69884261560000 | 0.88252082196600 | 0.89213727175700 |
| 0.06208862075150 | 0.92203342953400 | 0.23960485178000 |
| 0.06208861171930 | 0.92203317918200 | 0.57293814264700 |
| 0.06208862285380 | 0.92203331346700 | 0.90627163458000 |
| 0.39542195623800 | 0.92203342098800 | 0.23960484529400 |
| 0.39542194703500 | 0.92203317046500 | 0.57293813540000 |
| 0.39542195839200 | 0.92203330386200 | 0.90627162812800 |
| 0.72875527708500 | 0.92203342359200 | 0.23960484881000 |
| 0.72875526801800 | 0.92203317400500 | 0.57293814002700 |
| 0.72875527952600 | 0.92203330792800 | 0.90627163206100 |
| 0.00335428345706 | 0.89424402259000 | 0.24347712549400 |
| 0.00335427084724 | 0.89424387066900 | 0.57681048351400 |
| 0.00335429659790 | 0.89424386478600 | 0.91014393247900 |
| 0.33668762404100 | 0.89424402939000 | 0.24347712149300 |
| 0.33668761119900 | 0.89424387735700 | 0.57681047887100 |
| 0.33668763712700 | 0.89424387101700 | 0.91014392867300 |
| 0.67002094282700 | 0.89424402767800 | 0.24347712213900 |
| 0.67002093010300 | 0.89424387577400 | 0.57681047994600 |
| 0.67002095634800 | 0.89424386971300 | 0.91014392952200 |
| 0.00631924331122 | 0.90582410960000 | 0.21065800346600 |
| 0.00631926297049 | 0.90582388000600 | 0.54399136587100 |
| 0.00631925146503 | 0.90582378172600 | 0.87732484272500 |
| 0.33965258592300 | 0.90582409887700 | 0.21065801398900 |
| 0.33965260547500 | 0.90582386981100 | 0.54399137571400 |
| 0.33965259402900 | 0.90582376976600 | 0.87732485371700 |
| 0.67298590396000 | 0.90582410183900 | 0.21065801120800 |
| 0.67298592320800 | 0.90582387352000 | 0.54399137271300 |
| 0.67298591247000 | 0.90582377370400 | 0.87732485066500 |

|                  |                  |                  |
|------------------|------------------|------------------|
| 0.01304652537650 | 0.93112581827000 | 0.26961253300200 |
| 0.01304651322100 | 0.93112561666500 | 0.60294588700600 |
| 0.01304652023740 | 0.93112571700200 | 0.93627933031700 |
| 0.34637985394700 | 0.93112581685200 | 0.26961253019000 |
| 0.34637984117100 | 0.93112561410000 | 0.60294588339400 |
| 0.34637984867400 | 0.93112571495800 | 0.93627932760600 |
| 0.67971317129600 | 0.93112581056000 | 0.26961253047100 |
| 0.67971315975900 | 0.93112560927700 | 0.60294588430400 |
| 0.67971316675000 | 0.93112570966300 | 0.93627932812900 |
| 0.31455636015300 | 0.92927131580100 | 0.26535280294200 |
| 0.31455639655900 | 0.92927108518800 | 0.59868615494000 |
| 0.31455643288400 | 0.92927113175100 | 0.93201961636100 |
| 0.64788967337500 | 0.92927132152700 | 0.26535280195700 |
| 0.64788971006200 | 0.92927109097200 | 0.59868615426700 |
| 0.64788974684500 | 0.92927113748400 | 0.93201961562200 |
| 0.98122300872800 | 0.92927131678300 | 0.26535280198900 |
| 0.98122304538900 | 0.92927108668800 | 0.59868615475100 |
| 0.98122308158100 | 0.92927113316300 | 0.93201961532400 |
| 0.07274782295540 | 0.87319849219500 | 0.24313154666200 |
| 0.07274791462580 | 0.87319817295500 | 0.57646499629800 |
| 0.07274791302150 | 0.87319826006400 | 0.90979841745100 |
| 0.40608114497000 | 0.87319852811700 | 0.24313153265800 |
| 0.40608123616400 | 0.87319820922500 | 0.57646498141600 |
| 0.40608123562200 | 0.87319829460300 | 0.90979840419800 |
| 0.73941447626300 | 0.87319850293900 | 0.24313154049300 |
| 0.73941456807200 | 0.87319818316700 | 0.57646499033300 |
| 0.73941456670000 | 0.87319827068900 | 0.90979841172800 |
| 0.31780204880400 | 0.96021112754400 | 0.18272573349400 |
| 0.31780200960700 | 0.96021097444500 | 0.51605903525900 |
| 0.31780213091900 | 0.96021093583400 | 0.84939257908600 |

|                  |                  |                  |
|------------------|------------------|------------------|
| 0.65113535954400 | 0.96021112817500 | 0.18272572967200 |
| 0.65113531873400 | 0.96021097498500 | 0.51605903077200 |
| 0.65113544275100 | 0.96021093649100 | 0.84939257562200 |
| 0.98446869314000 | 0.96021111898000 | 0.18272572658900 |
| 0.98446865372800 | 0.96021096556300 | 0.51605902855700 |
| 0.98446877523800 | 0.96021092843500 | 0.84939257132300 |
| 0.01656923243610 | 0.96396584915200 | 0.18173712320600 |
| 0.01656928656540 | 0.96396570952600 | 0.51507041738700 |
| 0.01656916687160 | 0.96396563639200 | 0.84840397625500 |
| 0.34990256072200 | 0.96396585803600 | 0.18173712683500 |
| 0.34990261516700 | 0.96396571894700 | 0.51507042011800 |
| 0.34990249472900 | 0.96396564378500 | 0.84840398084200 |
| 0.68323587664200 | 0.96396585187400 | 0.18173712926500 |
| 0.68323593072900 | 0.96396571223400 | 0.51507042299600 |
| 0.68323581213500 | 0.96396563856300 | 0.84840398259000 |
| 0.22206837852700 | 0.37085751065400 | 0.22923557145500 |
| 0.22206830931000 | 0.37085773784300 | 0.56256900507100 |
| 0.22206827483700 | 0.37085779189000 | 0.89590267857900 |
| 0.55540165547500 | 0.37085744420400 | 0.22923558314800 |
| 0.55540158655200 | 0.37085767504000 | 0.56256901558600 |
| 0.55540155300000 | 0.37085772719000 | 0.89590269167500 |
| 0.88873498839600 | 0.37085753684000 | 0.22923556437200 |
| 0.88873492001700 | 0.37085776745800 | 0.56256899968500 |
| 0.88873488616000 | 0.37085781827100 | 0.89590267277500 |
| 0.16959630672800 | 0.37983126509800 | 0.22776964071500 |
| 0.16959622560300 | 0.37983167635500 | 0.56110301397000 |
| 0.16959632304500 | 0.37983141078100 | 0.89443670698200 |
| 0.50292961052300 | 0.37983115930900 | 0.22776963445700 |
| 0.50292952867500 | 0.37983157440100 | 0.56110300700500 |
| 0.50292962717600 | 0.37983130723000 | 0.89443670205900 |

|                  |                  |                  |
|------------------|------------------|------------------|
| 0.83626291848200 | 0.37983128419300 | 0.22776964093400 |
| 0.83626283783100 | 0.37983169956400 | 0.56110301665500 |
| 0.83626293577900 | 0.37983143043700 | 0.89443670960100 |
| 0.16167227129900 | 0.34817749980900 | 0.27065872267900 |
| 0.16167224654400 | 0.34817779730600 | 0.60399235082000 |
| 0.16167221358500 | 0.34817754662200 | 0.93732594992100 |
| 0.49500557595900 | 0.34817737386700 | 0.27065872064900 |
| 0.49500555084000 | 0.34817767634800 | 0.60399234669700 |
| 0.49500551905400 | 0.34817742154100 | 0.93732594920700 |
| 0.8283388546900  | 0.34817752017300 | 0.27065872249900 |
| 0.82833886129000 | 0.34817782117500 | 0.60399235305800 |
| 0.82833882811900 | 0.34817756538000 | 0.93732595178600 |
| 0.16162272279700 | 0.30446249908000 | 0.19481608725100 |
| 0.16162281202200 | 0.30446325113900 | 0.52814953921700 |
| 0.16162269633900 | 0.30446303228700 | 0.86148311197800 |
| 0.49495602354000 | 0.30446238325300 | 0.19481605606800 |
| 0.49495610983000 | 0.30446313519000 | 0.52814950805300 |
| 0.49495599632500 | 0.30446292042300 | 0.86148308331400 |
| 0.82828932805100 | 0.30446251786000 | 0.19481609143400 |
| 0.82828941727000 | 0.30446327538500 | 0.52814954690200 |
| 0.82828930186800 | 0.30446305198500 | 0.86148311972200 |
| 0.22238054975500 | 0.89013862169200 | 0.22920555875100 |
| 0.22238047716400 | 0.89013839642900 | 0.56253899407700 |
| 0.22238044737200 | 0.89013834236200 | 0.89587266206500 |
| 0.55571382652700 | 0.89013868805500 | 0.22920557045900 |
| 0.55571375422500 | 0.89013845912500 | 0.56253900465700 |
| 0.55571372535200 | 0.89013840698500 | 0.89587267519700 |
| 0.88904715968200 | 0.89013859540100 | 0.22920555166100 |
| 0.88904708791300 | 0.89013836667900 | 0.56253898865600 |
| 0.88904705873800 | 0.89013831583300 | 0.89587265624600 |

|                  |                  |                  |
|------------------|------------------|------------------|
| 0.16990224750800 | 0.88050525069400 | 0.22683474795700 |
| 0.16990217301300 | 0.88050483274800 | 0.56016811106000 |
| 0.16990226455400 | 0.88050511320500 | 0.89350181543800 |
| 0.50323555127200 | 0.88050535599600 | 0.22683474187200 |
| 0.50323547601800 | 0.88050493425800 | 0.56016810428800 |
| 0.50323556863700 | 0.88050521626300 | 0.89350181068400 |
| 0.83656885936900 | 0.88050523166600 | 0.22683474821700 |
| 0.83656878530700 | 0.88050480957600 | 0.56016811376200 |
| 0.83656887735700 | 0.88050509354600 | 0.89350181805700 |
| 0.16150812192400 | 0.91218496437900 | 0.26958981002700 |
| 0.16150809966600 | 0.91218466274600 | 0.60292342362600 |
| 0.16150806596300 | 0.91218490621800 | 0.93625708990300 |
| 0.49484142701700 | 0.91218508948400 | 0.26958980770500 |
| 0.49484140431700 | 0.91218478301900 | 0.60292341902600 |
| 0.49484137181500 | 0.91218503045200 | 0.93625708884800 |
| 0.82817473640500 | 0.91218494425700 | 0.26958980990800 |
| 0.82817471467100 | 0.91218463908900 | 0.60292342594800 |
| 0.82817468077300 | 0.91218488762900 | 0.93625709174000 |
| 0.16169880219600 | 0.95631724591900 | 0.19467725138100 |
| 0.16169889313200 | 0.95631650487200 | 0.52801070345800 |
| 0.16169877851000 | 0.95631672630600 | 0.86134427521400 |
| 0.49503210285600 | 0.95631736174900 | 0.19467722053300 |
| 0.49503219084000 | 0.95631662078100 | 0.52801067267300 |
| 0.49503207841300 | 0.95631683815500 | 0.86134424689300 |
| 0.82836540763700 | 0.95631722714200 | 0.19467725558900 |
| 0.82836549854500 | 0.95631648060600 | 0.52801071111700 |
| 0.82836538418600 | 0.95631670658300 | 0.86134428292700 |
| 0.06265351343270 | 0.36983212985300 | 0.23327231970600 |
| 0.06265344605500 | 0.36983230741600 | 0.56660575055100 |
| 0.06265340471170 | 0.36983234658200 | 0.89993940453000 |

|                  |                  |                  |
|------------------|------------------|------------------|
| 0.39598687005400 | 0.36983205036000 | 0.23327233766100 |
| 0.39598680207100 | 0.36983222876700 | 0.56660576595800 |
| 0.39598676127700 | 0.36983226785800 | 0.89993942305000 |
| 0.72932012153800 | 0.36983211760900 | 0.23327232469600 |
| 0.72932005366600 | 0.36983229841700 | 0.56660575556500 |
| 0.72932001443000 | 0.36983233433400 | 0.89993941146200 |
| 0.01111677151620 | 0.37990729907700 | 0.22446239099400 |
| 0.01111672014080 | 0.37990770843200 | 0.55779575243200 |
| 0.01111678123900 | 0.37990740998300 | 0.89112943325600 |
| 0.34445014259900 | 0.37990721309000 | 0.22446238713900 |
| 0.34445008947900 | 0.37990762245300 | 0.55779574616200 |
| 0.34445015142600 | 0.37990732542300 | 0.89112942924900 |
| 0.67778338913800 | 0.37990724088800 | 0.22446238749600 |
| 0.67778333664700 | 0.37990765356800 | 0.55779574884000 |
| 0.67778339958700 | 0.37990735315800 | 0.89112943142100 |
| 0.33066608951700 | 0.35166692545000 | 0.26693777778600 |
| 0.33066607684400 | 0.35166724744800 | 0.60027140297800 |
| 0.33066604415500 | 0.35166701998500 | 0.93360502294800 |
| 0.66399933101100 | 0.35166694265100 | 0.26693777670100 |
| 0.66399931965700 | 0.35166726698700 | 0.60027140406800 |
| 0.66399928719200 | 0.35166703595500 | 0.93360502330700 |
| 0.99733271999100 | 0.35166701279000 | 0.26693777994200 |
| 0.99733270902200 | 0.35166733415000 | 0.60027140858300 |
| 0.99733267461500 | 0.35166710622700 | 0.93360502467800 |
| 0.00114083086946 | 0.30413364907200 | 0.19456009205400 |
| 0.00114083873146 | 0.30413444628900 | 0.52789350788100 |
| 0.00114085255088 | 0.30413415322700 | 0.86122700197000 |
| 0.33447420244200 | 0.30413355991700 | 0.19456006666800 |
| 0.33447420751400 | 0.30413435514900 | 0.52789348028200 |
| 0.33447422228900 | 0.30413406849900 | 0.86122697747900 |

|                  |                  |                  |
|------------------|------------------|------------------|
| 0.66780742740300 | 0.30413358136800 | 0.19456007175400 |
| 0.66780743293800 | 0.30413438054200 | 0.52789348806700 |
| 0.66780745018500 | 0.30413408944500 | 0.86122698430000 |
| 0.06247508803500 | 0.89227291801100 | 0.23133167918700 |
| 0.06247501486300 | 0.89227271695800 | 0.56466511806800 |
| 0.06247498081600 | 0.89227268176200 | 0.89799875238800 |
| 0.39580844492700 | 0.89227299694100 | 0.23133169695300 |
| 0.39580837110700 | 0.89227279525600 | 0.56466513337500 |
| 0.39580833759700 | 0.89227275990300 | 0.89799877075000 |
| 0.72914169597700 | 0.89227292977700 | 0.23133168397500 |
| 0.72914162223900 | 0.89227272551900 | 0.56466512289200 |
| 0.72914159035800 | 0.89227269355100 | 0.89799875911400 |
| 0.01087991724570 | 0.88229858948300 | 0.22355474518000 |
| 0.01087986792790 | 0.88229814896300 | 0.55688811657100 |
| 0.01087992954580 | 0.88229845813000 | 0.89022176806900 |
| 0.34421328821000 | 0.88229867569100 | 0.22355474186900 |
| 0.34421323711700 | 0.88229823528300 | 0.55688811097300 |
| 0.34421329964300 | 0.88229854282200 | 0.89022176463400 |
| 0.67754653454700 | 0.88229864814600 | 0.22355474194300 |
| 0.67754648405000 | 0.88229820442900 | 0.55688811329000 |
| 0.67754654758700 | 0.88229851538300 | 0.89022176655000 |
| 0.33122987816700 | 0.90933540919100 | 0.26663580170300 |
| 0.33122986496400 | 0.90933508088600 | 0.59996942922800 |
| 0.33122984747300 | 0.90933532738700 | 0.93330301426600 |
| 0.66456311967600 | 0.90933539130100 | 0.26663580030300 |
| 0.66456310783000 | 0.90933506065700 | 0.59996943004100 |
| 0.66456309051400 | 0.90933531075400 | 0.93330301437700 |
| 0.99789650930700 | 0.90933532115400 | 0.26663580329900 |
| 0.99789649789300 | 0.90933499347500 | 0.59996943420600 |
| 0.99789647861800 | 0.90933524038400 | 0.93330301549000 |

|                  |                  |                  |
|------------------|------------------|------------------|
| 0.00099113778247 | 0.95691274067700 | 0.19434460110600 |
| 0.00099114505293 | 0.95691194549000 | 0.52767801917600 |
| 0.00099115778152 | 0.95691223902300 | 0.86101150963800 |
| 0.33432450943800 | 0.95691282949700 | 0.19434457579400 |
| 0.33432451393000 | 0.95691203635700 | 0.52767799169700 |
| 0.33432452758800 | 0.95691232348800 | 0.86101148525100 |
| 0.66765773450300 | 0.95691280821700 | 0.19434458083100 |
| 0.66765773944100 | 0.95691201112200 | 0.52767799941300 |
| 0.66765775560600 | 0.95691230269600 | 0.86101149200100 |

### 8) Large supercell 2-H<sub>sol</sub><sup>+</sup> FS

POSCAR

1

|                    |                    |                    |
|--------------------|--------------------|--------------------|
| 48.68518359261381  | 0.0000000000000000 | 0.0000000000000000 |
| 0.0000000000000000 | 30.38812200000589  | 0.0000000000000000 |
| 0.0000000000000000 | 0.0000000000000000 | 51.63843519240750  |

Al As H O

540 540 342 144

Direct

|                  |                  |                  |
|------------------|------------------|------------------|
| 0.99988110816300 | 0.01563912251510 | 0.00989153158543 |
| 0.00013229127068 | 0.01558605230630 | 0.34330759689600 |
| 0.00009424430329 | 0.01586732579730 | 0.67684376134700 |
| 0.33346159139900 | 0.01548093262590 | 0.00989672437503 |
| 0.33336507466100 | 0.01561388404720 | 0.34325463053700 |
| 0.33345352394200 | 0.01585576534880 | 0.67683010851000 |
| 0.66677283641700 | 0.01577470792220 | 0.01007471903290 |
| 0.66676544615000 | 0.01583633445410 | 0.34345047882600 |
| 0.66676580268800 | 0.01579869038560 | 0.67680837325800 |
| 0.33239099482700 | 0.00747170634617 | 0.22348302199700 |
| 0.33280953719700 | 0.00753146695909 | 0.55700816985800 |



|                  |                  |                  |
|------------------|------------------|------------------|
| 0.33284086753400 | 0.00751682800151 | 0.89031232909400 |
| 0.66612260037000 | 0.00747037309134 | 0.22367238628900 |
| 0.66612876430800 | 0.00750130283489 | 0.55701673379100 |
| 0.66613210248500 | 0.00750873321392 | 0.89032699230600 |
| 0.99966394382400 | 0.00761519300519 | 0.22382055114700 |
| 0.99948571771800 | 0.00751376436028 | 0.55701734128900 |
| 0.99943098991900 | 0.00753438627109 | 0.89029849241000 |
| 0.00156000841726 | 0.01582196254880 | 0.11962014386000 |
| 0.00046332540831 | 0.01542044157520 | 0.45295851881800 |
| 0.00046088392970 | 0.01584393324460 | 0.78640248104500 |
| 0.33232430988800 | 0.01529761511600 | 0.11970482506800 |
| 0.33383040765100 | 0.01575573401660 | 0.45303274212800 |
| 0.33380423386200 | 0.01585779081460 | 0.78640841320000 |
| 0.66713656107000 | 0.01555981426970 | 0.11967549911100 |
| 0.66712848239800 | 0.01563455679420 | 0.45301213537300 |
| 0.66711750611500 | 0.01581778711000 | 0.78640593194400 |
| 0.16674131577900 | 0.01519099014920 | 0.00967806559226 |
| 0.16663576376800 | 0.01421380461360 | 0.34268370489700 |
| 0.16668050068800 | 0.01466460626010 | 0.67667786257100 |
| 0.50004029950700 | 0.01464374707700 | 0.01002217320220 |
| 0.49995394037800 | 0.01474888968670 | 0.34333763550600 |
| 0.50000083371100 | 0.01464729671000 | 0.67671353483600 |
| 0.83323382076200 | 0.01463433621290 | 0.01004092289840 |
| 0.83333820614900 | 0.01473681878570 | 0.34335076911000 |
| 0.83334430229700 | 0.01469250232640 | 0.67670581647300 |
| 0.16534557484300 | 0.00221887113517 | 0.22364988576000 |
| 0.16481934297400 | 0.00772226107060 | 0.55680963871000 |
| 0.16480245125000 | 0.00766612226587 | 0.89005831370300 |
| 0.49804950451500 | 0.00770204048845 | 0.22337886644900 |
| 0.49814435543700 | 0.00768148146124 | 0.55675851986300 |

|                  |                  |                  |
|------------------|------------------|------------------|
| 0.49814166012500 | 0.00765984913553 | 0.89005990149000 |
| 0.83147108173900 | 0.00764771697393 | 0.22338059774000 |
| 0.83147086057800 | 0.00766263205699 | 0.55675838553600 |
| 0.83145659002600 | 0.00767144595868 | 0.89007750501200 |
| 0.16729785098400 | 0.01480598306050 | 0.11940839296000 |
| 0.16230463274800 | 0.98508633982300 | 0.43939209668900 |
| 0.16224039241500 | 0.98344621132100 | 0.77227763716100 |
| 0.49518891817900 | 0.98284286038500 | 0.10551158504500 |
| 0.49554058897000 | 0.98340875003100 | 0.43894797227200 |
| 0.49559601831000 | 0.98277044882500 | 0.77201752339700 |
| 0.82923574538600 | 0.98197285160300 | 0.10513406440800 |
| 0.82890390546900 | 0.98320923444500 | 0.43886020915400 |
| 0.82892609764200 | 0.98337190462100 | 0.77224581021000 |
| 0.08329076003020 | 0.01530970406150 | 0.00933123459021 |
| 0.08350989089990 | 0.01468927113130 | 0.34291339640100 |
| 0.08355817283550 | 0.01507227030880 | 0.67641179973600 |
| 0.41695031901700 | 0.01490687413330 | 0.00967318551447 |
| 0.41684749701500 | 0.01515491278190 | 0.34303488461800 |
| 0.41691690431700 | 0.01510573333070 | 0.67645047636000 |
| 0.75023004944800 | 0.01511473601850 | 0.00975947553775 |
| 0.75023903859000 | 0.01512187921380 | 0.34309457505000 |
| 0.75022870740100 | 0.01511050013520 | 0.67644766326600 |
| 0.08372768568210 | 0.01471689482680 | 0.23054025492600 |
| 0.08237505773740 | 0.01615205490520 | 0.56305573541700 |
| 0.08234510121150 | 0.01603501428010 | 0.89628048688800 |
| 0.41554635569800 | 0.01573120771590 | 0.22950949045400 |
| 0.41572231084500 | 0.01589512281190 | 0.56293191454400 |
| 0.41574500666900 | 0.01591594587120 | 0.89623808963600 |
| 0.74904957449300 | 0.01581400701540 | 0.22957250899900 |
| 0.74904091818500 | 0.01592576267450 | 0.56297066656300 |

|                  |                  |                  |
|------------------|------------------|------------------|
| 0.74904592620000 | 0.01596609645610 | 0.89630411920400 |
| 0.08449375496750 | 0.01460831891720 | 0.12090618016000 |
| 0.08360148577670 | 0.01374270187810 | 0.45621223114900 |
| 0.08366942482780 | 0.01354782774390 | 0.78962369835400 |
| 0.41636930355400 | 0.01297277479380 | 0.12282248414900 |
| 0.41700199604300 | 0.01354660370730 | 0.45622437321300 |
| 0.41705436800600 | 0.01347808794910 | 0.78961403827800 |
| 0.75054127458700 | 0.01318922823720 | 0.12288764331900 |
| 0.75035765297300 | 0.01343420428100 | 0.45623324940800 |
| 0.75033891710100 | 0.01351311968230 | 0.78958882275000 |
| 0.25010967503400 | 0.01546800882640 | 0.00927133908829 |
| 0.24987499393200 | 0.01483507647970 | 0.34243726915200 |
| 0.24990425185100 | 0.01532920001340 | 0.67616527607600 |
| 0.58321549252000 | 0.01538231419060 | 0.00949897207014 |
| 0.58319197885100 | 0.01536449252500 | 0.34282547008500 |
| 0.58320696282300 | 0.01533646271720 | 0.67618789148100 |
| 0.91636211641300 | 0.01518128227750 | 0.00941163203046 |
| 0.91653798517500 | 0.01541990924100 | 0.34281790635400 |
| 0.91655945581800 | 0.01538937169910 | 0.67620458431800 |
| 0.24835164449600 | 0.01316284998260 | 0.22961200736400 |
| 0.24948546779000 | 0.01516637926420 | 0.56391695536200 |
| 0.24951641081700 | 0.01514085919450 | 0.89720373335700 |
| 0.58276269878400 | 0.01507247754540 | 0.23052978112500 |
| 0.58280278368500 | 0.01513397244590 | 0.56390089106300 |
| 0.58279677488700 | 0.01510474755460 | 0.89720968219600 |
| 0.91615784174700 | 0.01519292882150 | 0.23057292349400 |
| 0.91614643131200 | 0.01503256472750 | 0.56387293351100 |
| 0.91608992074900 | 0.01507625380740 | 0.89714386377900 |
| 0.24909599298200 | 0.01483280394830 | 0.12025368414600 |
| 0.25325236011200 | 0.01684498874560 | 0.45353303276800 |

|                  |                  |                  |
|------------------|------------------|------------------|
| 0.25309967265000 | 0.01670872341560 | 0.78689270642000 |
| 0.58627135502000 | 0.01654985864610 | 0.12020180704900 |
| 0.58641910963800 | 0.01667756261610 | 0.45357100894300 |
| 0.58638386646700 | 0.01664243423410 | 0.78688326691300 |
| 0.92033053200800 | 0.01610847319030 | 0.12017722643500 |
| 0.91974949881000 | 0.01660060409310 | 0.45351378959600 |
| 0.91977329625600 | 0.01682830261600 | 0.78694325252500 |
| 0.12486281176400 | 0.06057468540680 | 0.05434203902690 |
| 0.12608513793200 | 0.06162970120230 | 0.38893417491000 |
| 0.12619210955100 | 0.06155508003570 | 0.72242437357300 |
| 0.45945523084700 | 0.06155856290240 | 0.05587309021170 |
| 0.45951639007600 | 0.06153059894030 | 0.38903644198300 |
| 0.45957743209100 | 0.06157735939680 | 0.72247048293600 |
| 0.79297231935700 | 0.06156688186680 | 0.05583462322030 |
| 0.79287738488900 | 0.06154589005620 | 0.38907652914100 |
| 0.79286810371600 | 0.06155903387100 | 0.72242229556100 |
| 0.12484452106700 | 0.06191951900260 | 0.27698908364900 |
| 0.12514367777900 | 0.06187457970230 | 0.61028713455000 |
| 0.12512818830900 | 0.06183863927130 | 0.94347475974900 |
| 0.45840640585700 | 0.06184616402870 | 0.27691309143800 |
| 0.45848046602500 | 0.06188856966790 | 0.61030619762100 |
| 0.45852442993100 | 0.06188118147470 | 0.94361172347500 |
| 0.79180337500600 | 0.06185942881950 | 0.27694708438600 |
| 0.79180505735600 | 0.06187404783660 | 0.61029260967700 |
| 0.79178068477400 | 0.06187685640990 | 0.94361375022500 |
| 0.12572268302700 | 0.06196177901340 | 0.16558659755100 |
| 0.12511186497100 | 0.06092955154280 | 0.49689805061200 |
| 0.12513325605500 | 0.06092890348560 | 0.83026534888400 |
| 0.45822135062600 | 0.06089965166590 | 0.16362705320900 |
| 0.45845731511100 | 0.06094082532430 | 0.49696035638100 |

|                  |                  |                  |
|------------------|------------------|------------------|
| 0.45846926428100 | 0.06088705699880 | 0.83024520353100 |
| 0.79182420013300 | 0.06083779114700 | 0.16358681580400 |
| 0.79177833043900 | 0.06091698953420 | 0.49694976653800 |
| 0.79177698402300 | 0.06092360434580 | 0.83028888850000 |
| 0.29168747594000 | 0.06055930062680 | 0.05405030894640 |
| 0.29174295081800 | 0.06086676324330 | 0.38738970642800 |
| 0.29169143507500 | 0.06076758026250 | 0.72070994297200 |
| 0.62497590414000 | 0.06079331257490 | 0.05411523658440 |
| 0.62499339981000 | 0.06079007479660 | 0.38741785215900 |
| 0.62499631616800 | 0.06078909821930 | 0.72074838489500 |
| 0.95832927840800 | 0.06078744431200 | 0.05413896424800 |
| 0.95829794114600 | 0.06079706615780 | 0.38740195585100 |
| 0.95834472396500 | 0.06076150274830 | 0.72070585865700 |
| 0.29181946621500 | 0.06109446102740 | 0.27645628144900 |
| 0.29198185105000 | 0.06115873545460 | 0.60983226464400 |
| 0.29202536563800 | 0.06115147470040 | 0.94306714695500 |
| 0.62527348344100 | 0.06113952982250 | 0.27648374575900 |
| 0.62529490328600 | 0.06115916563220 | 0.60983425590300 |
| 0.62528205712000 | 0.06114139540300 | 0.94313916415800 |
| 0.95855708671900 | 0.06106524047230 | 0.27642584634900 |
| 0.95863101941700 | 0.06115844144230 | 0.60984469636700 |
| 0.95853087192000 | 0.06111939622010 | 0.94311139292900 |
| 0.29119493910200 | 0.06224942896170 | 0.16551815644100 |
| 0.29177296625100 | 0.06196839635610 | 0.49859653802500 |
| 0.29179696997400 | 0.06200401915160 | 0.83195614157600 |
| 0.62505158279000 | 0.06203119420600 | 0.16536603856900 |
| 0.62508664432500 | 0.06200175055700 | 0.49866116546000 |
| 0.62511503803600 | 0.06201456680650 | 0.83198447624800 |
| 0.95870049954500 | 0.06203048069840 | 0.16536228694100 |
| 0.95846644870400 | 0.06205013689810 | 0.49870180026600 |

|                  |                  |                  |
|------------------|------------------|------------------|
| 0.95843943808500 | 0.06198369988960 | 0.83194764764700 |
| 0.04200700332090 | 0.06055401715220 | 0.05407439587820 |
| 0.04250792367450 | 0.06081602012060 | 0.38816743275600 |
| 0.04259189682650 | 0.06067654295490 | 0.72145201836700 |
| 0.37578057217400 | 0.06075793138590 | 0.05495201204390 |
| 0.37593103438400 | 0.06065562108100 | 0.38805560632100 |
| 0.37594529682900 | 0.06067901174540 | 0.72145906790300 |
| 0.70929962525500 | 0.06069586934140 | 0.05484228155740 |
| 0.70926604913700 | 0.06068167532050 | 0.38812663860000 |
| 0.70925694211600 | 0.06068013355010 | 0.72146116409900 |
| 0.04146310364930 | 0.06199606796930 | 0.27730369585000 |
| 0.04143972213500 | 0.06207117388670 | 0.61055187508500 |
| 0.04131804391570 | 0.06209122269130 | 0.94376738345700 |
| 0.37476333444400 | 0.06196834247240 | 0.27709703581600 |
| 0.37479968000600 | 0.06208021170700 | 0.61055942470200 |
| 0.37483024217100 | 0.06206883871240 | 0.94386923808600 |
| 0.70812703256800 | 0.06205730619170 | 0.27720232306200 |
| 0.70811867420800 | 0.06207739165210 | 0.61055649295200 |
| 0.70812734399600 | 0.06206341467640 | 0.94386379271400 |
| 0.04209393206470 | 0.06226552849030 | 0.16547245407500 |
| 0.04178045388360 | 0.06226918046320 | 0.49876005081800 |
| 0.04172223565940 | 0.06232430266520 | 0.83210969308000 |
| 0.37468262845400 | 0.06233243113560 | 0.16555681324500 |
| 0.37504584039700 | 0.06235196942660 | 0.49879446541000 |
| 0.37507503399600 | 0.06233324290420 | 0.83212296894500 |
| 0.70838921577900 | 0.06238058895740 | 0.16552916606000 |
| 0.70838206419600 | 0.06235888508590 | 0.49883658768100 |
| 0.70838954096400 | 0.06232814237120 | 0.83212840263700 |
| 0.20858732383500 | 0.06066043168050 | 0.05426984608190 |
| 0.20689251045700 | 0.06096083603920 | 0.38831737731500 |

|                  |                  |                  |
|------------------|------------------|------------------|
| 0.20675854696500 | 0.06092007946920 | 0.72179767502100 |
| 0.53997864907900 | 0.06093791974300 | 0.05516896666600 |
| 0.54005654948600 | 0.06093176635720 | 0.38847418356400 |
| 0.54002446696900 | 0.06096753089420 | 0.72185048520100 |
| 0.87330503659700 | 0.06094026683590 | 0.05528123289160 |
| 0.87336917512000 | 0.06092770864180 | 0.38844728514000 |
| 0.87342049464000 | 0.06092076332710 | 0.72180013901800 |
| 0.20810833618900 | 0.06145740527730 | 0.27694882063900 |
| 0.20807007100700 | 0.06155894067860 | 0.61034686471700 |
| 0.20815045027700 | 0.06152441152740 | 0.94352264263100 |
| 0.54134091232100 | 0.06153981977650 | 0.27699205634400 |
| 0.54138992498900 | 0.06156624200420 | 0.61035183503100 |
| 0.54140568600200 | 0.06154740803320 | 0.94365089755000 |
| 0.87470899253100 | 0.06152083345990 | 0.27695865901200 |
| 0.87473019378300 | 0.06155416893820 | 0.61034784052600 |
| 0.87463844196100 | 0.06156127279130 | 0.94366664452100 |
| 0.20743704565900 | 0.06134030900860 | 0.16539713431800 |
| 0.20851742404800 | 0.06370399612970 | 0.49910018661100 |
| 0.20850516298100 | 0.06364606434830 | 0.83241475209400 |
| 0.54173695399800 | 0.06353655285300 | 0.16569211140200 |
| 0.54184016769100 | 0.06359968056320 | 0.49903943903300 |
| 0.54183991881200 | 0.06359753139570 | 0.83239232163500 |
| 0.87532868679700 | 0.06348326130320 | 0.16569413099800 |
| 0.87516788797500 | 0.06360518120330 | 0.49905936036700 |
| 0.87515559430700 | 0.06360870356510 | 0.83237726793500 |
| 0.00000000000000 | 0.13043999660500 | 0.00000000000000 |
| 0.00000000000000 | 0.13043999660500 | 0.33333333333200 |
| 0.00000000000000 | 0.13043999660500 | 0.66666666666800 |
| 0.33333333333200 | 0.13043999660500 | 0.00000000000000 |
| 0.33333333333200 | 0.13043999660500 | 0.33333333333200 |

|                  |                  |                  |
|------------------|------------------|------------------|
| 0.3333333333200  | 0.13043999660500 | 0.6666666666800  |
| 0.6666666666800  | 0.13043999660500 | 0.00000000000000 |
| 0.6666666666800  | 0.13043999660500 | 0.3333333333200  |
| 0.6666666666800  | 0.13043999660500 | 0.6666666666800  |
| 0.00000000000000 | 0.13043999660500 | 0.22222334138000 |
| 0.00000000000000 | 0.13043999660500 | 0.55555667471300 |
| 0.00000000000000 | 0.13043999660500 | 0.88889000804700 |
| 0.3333333333200  | 0.13043999660500 | 0.22222334138000 |
| 0.3333333333200  | 0.13043999660500 | 0.55555667471300 |
| 0.3333333333200  | 0.13043999660500 | 0.88889000804700 |
| 0.6666666666800  | 0.13043999660500 | 0.22222334138000 |
| 0.6666666666800  | 0.13043999660500 | 0.55555667471300 |
| 0.6666666666800  | 0.13043999660500 | 0.88889000804700 |
| 0.00000000000000 | 0.13043999660500 | 0.11111000180100 |
| 0.00000000000000 | 0.13043999660500 | 0.44444333513300 |
| 0.00000000000000 | 0.13043999660500 | 0.77777666846700 |
| 0.3333333333200  | 0.13043999660500 | 0.11111000180100 |
| 0.3333333333200  | 0.13043999660500 | 0.44444333513300 |
| 0.3333333333200  | 0.13043999660500 | 0.77777666846700 |
| 0.6666666666800  | 0.13043999660500 | 0.11111000180100 |
| 0.6666666666800  | 0.13043999660500 | 0.44444333513300 |
| 0.6666666666800  | 0.13043999660500 | 0.77777666846700 |
| 0.16666666667500 | 0.13043999660500 | 0.00000000000000 |
| 0.16666666667500 | 0.13043999660500 | 0.3333333333200  |
| 0.16666666667500 | 0.13043999660500 | 0.6666666666800  |
| 0.5000000000700  | 0.13043999660500 | 0.00000000000000 |
| 0.5000000000700  | 0.13043999660500 | 0.3333333333200  |
| 0.5000000000700  | 0.13043999660500 | 0.6666666666800  |
| 0.83333333334100 | 0.13043999660500 | 0.00000000000000 |
| 0.83333333334100 | 0.13043999660500 | 0.3333333333200  |



|                  |                  |                  |
|------------------|------------------|------------------|
| 0.83333333334100 | 0.13043999660500 | 0.66666666666800 |
| 0.16666666667500 | 0.13043999660500 | 0.22222334138000 |
| 0.16666666667500 | 0.13043999660500 | 0.55555667471300 |
| 0.16666666667500 | 0.13043999660500 | 0.88889000804700 |
| 0.50000000000700 | 0.13043999660500 | 0.22222334138000 |
| 0.50000000000700 | 0.13043999660500 | 0.55555667471300 |
| 0.50000000000700 | 0.13043999660500 | 0.88889000804700 |
| 0.83333333334100 | 0.13043999660500 | 0.22222334138000 |
| 0.83333333334100 | 0.13043999660500 | 0.55555667471300 |
| 0.83333333334100 | 0.13043999660500 | 0.88889000804700 |
| 0.16666666667500 | 0.13043999660500 | 0.11111000180100 |
| 0.16666666667500 | 0.13043999660500 | 0.44444333513300 |
| 0.16666666667500 | 0.13043999660500 | 0.77777666846700 |
| 0.50000000000700 | 0.13043999660500 | 0.11111000180100 |
| 0.50000000000700 | 0.13043999660500 | 0.44444333513300 |
| 0.50000000000700 | 0.13043999660500 | 0.77777666846700 |
| 0.83333333334100 | 0.13043999660500 | 0.11111000180100 |
| 0.83333333334100 | 0.13043999660500 | 0.44444333513300 |
| 0.83333333334100 | 0.13043999660500 | 0.77777666846700 |
| 0.08333333332670 | 0.13043999660500 | 0.00000000000000 |
| 0.08333333332670 | 0.13043999660500 | 0.33333333332000 |
| 0.08333333332670 | 0.13043999660500 | 0.66666666666800 |
| 0.41666666666100 | 0.13043999660500 | 0.00000000000000 |
| 0.41666666666100 | 0.13043999660500 | 0.33333333332000 |
| 0.41666666666100 | 0.13043999660500 | 0.66666666666800 |
| 0.74999999993000 | 0.13043999660500 | 0.00000000000000 |
| 0.74999999993000 | 0.13043999660500 | 0.33333333332000 |
| 0.74999999993000 | 0.13043999660500 | 0.66666666666800 |
| 0.08333333332670 | 0.13043999660500 | 0.22222334138000 |
| 0.08333333332670 | 0.13043999660500 | 0.55555667471300 |

|                  |                  |                  |
|------------------|------------------|------------------|
| 0.08333333332670 | 0.13043999660500 | 0.88889000804700 |
| 0.41666666666100 | 0.13043999660500 | 0.22222334138000 |
| 0.41666666666100 | 0.13043999660500 | 0.55555667471300 |
| 0.41666666666100 | 0.13043999660500 | 0.88889000804700 |
| 0.74999999999300 | 0.13043999660500 | 0.22222334138000 |
| 0.74999999999300 | 0.13043999660500 | 0.55555667471300 |
| 0.74999999999300 | 0.13043999660500 | 0.88889000804700 |
| 0.08333333332670 | 0.13043999660500 | 0.11111000180100 |
| 0.08333333332670 | 0.13043999660500 | 0.44444333513300 |
| 0.08333333332670 | 0.13043999660500 | 0.77777666846700 |
| 0.41666666666100 | 0.13043999660500 | 0.11111000180100 |
| 0.41666666666100 | 0.13043999660500 | 0.44444333513300 |
| 0.41666666666100 | 0.13043999660500 | 0.77777666846700 |
| 0.74999999999300 | 0.13043999660500 | 0.11111000180100 |
| 0.74999999999300 | 0.13043999660500 | 0.44444333513300 |
| 0.74999999999300 | 0.13043999660500 | 0.77777666846700 |
| 0.25000000008900 | 0.13043999660500 | 0.00000000000000 |
| 0.25000000008900 | 0.13043999660500 | 0.33333333332000 |
| 0.25000000008900 | 0.13043999660500 | 0.66666666668000 |
| 0.58333333342100 | 0.13043999660500 | 0.00000000000000 |
| 0.58333333342100 | 0.13043999660500 | 0.33333333332000 |
| 0.58333333342100 | 0.13043999660500 | 0.66666666668000 |
| 0.91666666675500 | 0.13043999660500 | 0.00000000000000 |
| 0.91666666675500 | 0.13043999660500 | 0.33333333332000 |
| 0.91666666675500 | 0.13043999660500 | 0.66666666668000 |
| 0.25000000008900 | 0.13043999660500 | 0.22222334138000 |
| 0.25000000008900 | 0.13043999660500 | 0.55555667471300 |
| 0.25000000008900 | 0.13043999660500 | 0.88889000804700 |
| 0.58333333342100 | 0.13043999660500 | 0.22222334138000 |
| 0.58333333342100 | 0.13043999660500 | 0.55555667471300 |

|                  |                  |                  |
|------------------|------------------|------------------|
| 0.58333333342100 | 0.13043999660500 | 0.88889000804700 |
| 0.91666666675500 | 0.13043999660500 | 0.22222334138000 |
| 0.91666666675500 | 0.13043999660500 | 0.55555667471300 |
| 0.91666666675500 | 0.13043999660500 | 0.88889000804700 |
| 0.25000000008900 | 0.13043999660500 | 0.11111000180100 |
| 0.25000000008900 | 0.13043999660500 | 0.44444333513300 |
| 0.25000000008900 | 0.13043999660500 | 0.77777666846700 |
| 0.58333333342100 | 0.13043999660500 | 0.11111000180100 |
| 0.58333333342100 | 0.13043999660500 | 0.44444333513300 |
| 0.58333333342100 | 0.13043999660500 | 0.77777666846700 |
| 0.91666666675500 | 0.13043999660500 | 0.11111000180100 |
| 0.91666666675500 | 0.13043999660500 | 0.44444333513300 |
| 0.91666666675500 | 0.13043999660500 | 0.77777666846700 |
| 0.12486768647700 | 0.20028120786300 | 0.05436291564200 |
| 0.12608358671200 | 0.19925780212100 | 0.38892804841400 |
| 0.12619237713400 | 0.19933264157500 | 0.72241636103200 |
| 0.45945625112900 | 0.19932824885400 | 0.05586582358360 |
| 0.45951656247300 | 0.19935588404200 | 0.38902911634800 |
| 0.45957802899800 | 0.19931103696000 | 0.72246474323400 |
| 0.79297327049600 | 0.19931486510800 | 0.05582826757750 |
| 0.79287751873600 | 0.19934102332400 | 0.38906976370100 |
| 0.79286731033400 | 0.19932813775100 | 0.72241479784400 |
| 0.12482940053300 | 0.19890275124600 | 0.27702774087800 |
| 0.12513674206700 | 0.19891682629400 | 0.61033629875800 |
| 0.12511975694300 | 0.19895354579100 | 0.94352105277400 |
| 0.45839676133800 | 0.19894447365000 | 0.27696119811300 |
| 0.45847188406200 | 0.19890314289700 | 0.61035481421500 |
| 0.45851388523700 | 0.19891185094300 | 0.94366041264700 |
| 0.79179462737800 | 0.19893209746100 | 0.27699607492300 |
| 0.79179660206800 | 0.19891677329400 | 0.61034166592300 |

|                  |                  |                  |
|------------------|------------------|------------------|
| 0.79177213862100 | 0.19891302867700 | 0.94366375519800 |
| 0.12572311371500 | 0.19895913333800 | 0.16561627141200 |
| 0.12509387511200 | 0.19990648355900 | 0.49692552019200 |
| 0.12511553983100 | 0.19990862562600 | 0.83029144912300 |
| 0.45820369229100 | 0.19993582999600 | 0.16365436026900 |
| 0.45843905019000 | 0.19989686524500 | 0.49698680564400 |
| 0.45845228409700 | 0.19995176781700 | 0.83027138255400 |
| 0.79180726650800 | 0.20000292541000 | 0.16361054052900 |
| 0.79175968904500 | 0.19992057962600 | 0.49697634546700 |
| 0.79175884802500 | 0.19991428066200 | 0.83031462061500 |
| 0.29168963836900 | 0.20029424303600 | 0.05407502593960 |
| 0.29174789666800 | 0.19998902068300 | 0.38740641588100 |
| 0.29169642555600 | 0.20008492387900 | 0.72072934049100 |
| 0.62498063228600 | 0.20006058416000 | 0.05413290417750 |
| 0.62499860207700 | 0.20006455993100 | 0.38743483357500 |
| 0.62500075510600 | 0.20006529571500 | 0.72076517825700 |
| 0.95833322005800 | 0.20006460204100 | 0.05415850096240 |
| 0.95830208705300 | 0.20005811757600 | 0.38741804093000 |
| 0.95834970668400 | 0.20008968508600 | 0.72072606437900 |
| 0.29181500850200 | 0.19978810775400 | 0.27646161867200 |
| 0.29198593274300 | 0.19973123845600 | 0.60983181421900 |
| 0.29202908507200 | 0.19973812300900 | 0.94306412269900 |
| 0.62527735721500 | 0.19974916890300 | 0.27648358284000 |
| 0.62529816230600 | 0.19973071880800 | 0.60983442753600 |
| 0.62528594328100 | 0.19974780764800 | 0.94313820875600 |
| 0.95856317217700 | 0.19982365089900 | 0.27642300663800 |
| 0.95863492971800 | 0.19973031549200 | 0.60984465862900 |
| 0.95852957201900 | 0.19977327742900 | 0.94310736372800 |
| 0.29123942596100 | 0.19866435029500 | 0.16553116317700 |
| 0.29182165767500 | 0.19892657010500 | 0.49862361242000 |

|                  |                  |                  |
|------------------|------------------|------------------|
| 0.29184556895000 | 0.19889344652600 | 0.83198189838900 |
| 0.62509881984700 | 0.19886706802600 | 0.16539093204500 |
| 0.62513581588300 | 0.19889585488200 | 0.49868670245700 |
| 0.62516459001700 | 0.19888246774700 | 0.83201048747800 |
| 0.95874466550400 | 0.19886429460000 | 0.16538984005900 |
| 0.95851444180300 | 0.19884726374400 | 0.49872660953800 |
| 0.95848719324400 | 0.19891333276500 | 0.83197346273200 |
| 0.04201035575810 | 0.20029858665000 | 0.05409584990770 |
| 0.04250707906610 | 0.20004271967200 | 0.38817824965200 |
| 0.04259299290520 | 0.20017728352800 | 0.72146200085900 |
| 0.37577876848200 | 0.20009873147200 | 0.05496168636830 |
| 0.37593060545500 | 0.20019968322100 | 0.38806534913400 |
| 0.37594517418600 | 0.20017485692300 | 0.72147049855000 |
| 0.70930038892900 | 0.20015925060800 | 0.05485472864570 |
| 0.70926572976400 | 0.20017293638200 | 0.38813742591600 |
| 0.70925713970000 | 0.20017377226700 | 0.72147184900100 |
| 0.04145151419930 | 0.19892556439900 | 0.27730396558700 |
| 0.04142685466890 | 0.19883517473500 | 0.61055969477400 |
| 0.04130103036180 | 0.19881816291900 | 0.94377329216300 |
| 0.37474629422400 | 0.19892943099200 | 0.27710855404700 |
| 0.37478704989500 | 0.19882819606900 | 0.61056684821800 |
| 0.37481691578100 | 0.19883873942700 | 0.94387782004100 |
| 0.70811317263800 | 0.19884788294900 | 0.27721105701000 |
| 0.70810512996400 | 0.19883041729400 | 0.61056415043100 |
| 0.70811365140000 | 0.19884252636600 | 0.94387286318800 |
| 0.04207707223530 | 0.19863415047800 | 0.16548871490100 |
| 0.04176151200340 | 0.19861030335500 | 0.49878164140600 |
| 0.04170330324090 | 0.19855679568200 | 0.83213133932100 |
| 0.37466542426300 | 0.19855601296500 | 0.16556772327400 |
| 0.37502768300500 | 0.19852896725200 | 0.49881587051100 |

|                  |                  |                  |
|------------------|------------------|------------------|
| 0.37505674388700 | 0.19854852192500 | 0.83214453379200 |
| 0.70837134850200 | 0.19850535438100 | 0.16554690144400 |
| 0.70836419745300 | 0.19852591664300 | 0.49885454321100 |
| 0.70837192176600 | 0.19855350092400 | 0.83214922996100 |
| 0.20858950236100 | 0.20019427692500 | 0.05429036187170 |
| 0.20690099226800 | 0.19989921697300 | 0.38832457888700 |
| 0.20676836358600 | 0.19994368780400 | 0.72180055239500 |
| 0.53998549510700 | 0.19992484794600 | 0.05517396194560 |
| 0.54006688179000 | 0.19993241926500 | 0.38847764777800 |
| 0.54003095657000 | 0.19989805479700 | 0.72185465864200 |
| 0.87331486528000 | 0.19991615415500 | 0.05528273295120 |
| 0.87337732365800 | 0.19993521344500 | 0.38845100674100 |
| 0.87343043012600 | 0.19994173598600 | 0.72180342148300 |
| 0.20810121035300 | 0.19945539750600 | 0.27693344842800 |
| 0.20807145661800 | 0.19926648669300 | 0.61037113226900 |
| 0.20815374135900 | 0.19930266567800 | 0.94354521976400 |
| 0.54134117546700 | 0.19928620711500 | 0.27701659302800 |
| 0.54139084412600 | 0.19925896054600 | 0.61037622029900 |
| 0.54140639557700 | 0.19927634855600 | 0.94367636601100 |
| 0.87471028039100 | 0.19930580259100 | 0.27698406604400 |
| 0.87473130130900 | 0.19927050944800 | 0.61037163598000 |
| 0.87463823094000 | 0.19926577909900 | 0.94369109781100 |
| 0.20742241616000 | 0.19956514130000 | 0.16541207072400 |
| 0.20853426331000 | 0.19718544610200 | 0.49908587630200 |
| 0.20852380640800 | 0.19724409636900 | 0.83239852286600 |
| 0.54175366154500 | 0.19735554472000 | 0.16567562111600 |
| 0.54185830359900 | 0.19729073554600 | 0.49902336665600 |
| 0.54185674751200 | 0.19729565788200 | 0.83237579811900 |
| 0.87534586111600 | 0.19741122110600 | 0.16567743923000 |
| 0.87518566428500 | 0.19728606621100 | 0.49904303125400 |

|                  |                  |                  |
|------------------|------------------|------------------|
| 0.87517322489400 | 0.19728135884200 | 0.83236117713700 |
| 0.99988052021600 | 0.24520043385700 | 0.00991984578946 |
| 0.00012965246179 | 0.24525141541500 | 0.34333902504000 |
| 0.00009207880635 | 0.24496510597800 | 0.67687801123000 |
| 0.33345851449400 | 0.24536740953700 | 0.00992652755951 |
| 0.33336623995300 | 0.24522960182100 | 0.34328783760900 |
| 0.33345258426600 | 0.24497781388200 | 0.67686408483900 |
| 0.66677022173800 | 0.24506834571900 | 0.01010786118890 |
| 0.66676358635500 | 0.24500090232400 | 0.34348621754700 |
| 0.66676376761600 | 0.24503854428900 | 0.67684278725000 |
| 0.33244471318900 | 0.25370829319300 | 0.22346064796800 |
| 0.33286748350700 | 0.25367853740800 | 0.55700099012300 |
| 0.33290003520500 | 0.25369231399000 | 0.89030429353400 |
| 0.66617960442700 | 0.25373131094800 | 0.22366287851600 |
| 0.66618620578300 | 0.25370721351900 | 0.55700785879900 |
| 0.66619001670000 | 0.25369855420600 | 0.89031844155200 |
| 0.99972123233700 | 0.25354523622900 | 0.22382709558400 |
| 0.99954315059500 | 0.25369422869200 | 0.55701006615400 |
| 0.99948719342400 | 0.25367988394400 | 0.89028914950800 |
| 0.00156599377226 | 0.24509235880800 | 0.11965004012700 |
| 0.00047513595399 | 0.24549037843900 | 0.45298372524700 |
| 0.00047569976849 | 0.24505229243300 | 0.78643083790200 |
| 0.33233408207300 | 0.24563553700100 | 0.11972790864000 |
| 0.33384467632600 | 0.24513912394900 | 0.45306089152500 |
| 0.33381853489500 | 0.24504240676600 | 0.78643663208300 |
| 0.66714990707000 | 0.24534632272100 | 0.11970292342000 |
| 0.66714013677100 | 0.24526947193300 | 0.45304026896500 |
| 0.66713135244500 | 0.24507963985400 | 0.78643321763600 |
| 0.16674123228800 | 0.24568274499500 | 0.00970445538797 |
| 0.16663497629100 | 0.24667356803800 | 0.34269862743500 |

|                  |                  |                  |
|------------------|------------------|------------------|
| 0.16668201534800 | 0.24624195337700 | 0.67669900681100 |
| 0.50004013204100 | 0.24626236944400 | 0.01004275801730 |
| 0.49995394470300 | 0.24615592273600 | 0.34335845456600 |
| 0.50000168518400 | 0.24625933947200 | 0.67673579281400 |
| 0.83323384336800 | 0.24627394575600 | 0.01006412267080 |
| 0.83333922501600 | 0.24617031818200 | 0.34337153869700 |
| 0.83334492179200 | 0.24621046195300 | 0.67672788547900 |
| 0.16526802223600 | 0.25881032290000 | 0.22366530809100 |
| 0.16479890809100 | 0.25303039244300 | 0.55679989330400 |
| 0.16478209517200 | 0.25308615639700 | 0.89004846663200 |
| 0.49803091455200 | 0.25305364369000 | 0.22336871013200 |
| 0.49812509409800 | 0.25306989040400 | 0.55675044168100 |
| 0.49812193982400 | 0.25309281708800 | 0.89005072033400 |
| 0.83145087879500 | 0.25310413332800 | 0.22336965570100 |
| 0.83145095745400 | 0.25308904998100 | 0.55674980010200 |
| 0.83143646743500 | 0.25308022082900 | 0.89006994028800 |
| 0.16730250447800 | 0.24610665543700 | 0.11942699166300 |
| 0.16231269638300 | 0.27570535380800 | 0.43941836498400 |
| 0.16224412116900 | 0.27735801234300 | 0.77230637171300 |
| 0.49519182784900 | 0.27793328717700 | 0.10553535544800 |
| 0.49554484858200 | 0.27738729242500 | 0.43898145563500 |
| 0.49560029526600 | 0.27801129822900 | 0.77203499418900 |
| 0.82923841779500 | 0.27888523342000 | 0.10514129934600 |
| 0.82890756607200 | 0.27757186201500 | 0.43889056261000 |
| 0.82893008783900 | 0.27741925692800 | 0.77227799465200 |
| 0.08329407629290 | 0.24553189065500 | 0.00936064322438 |
| 0.08351298585080 | 0.24618334915900 | 0.34292948820200 |
| 0.08355940165300 | 0.24580565459600 | 0.67643609548200 |
| 0.41695003884300 | 0.24597484645800 | 0.00969934418746 |
| 0.41684981909400 | 0.24572089915400 | 0.34305947769000 |



|                  |                  |                  |
|------------------|------------------|------------------|
| 0.41691980288900 | 0.24576811790400 | 0.67647750112500 |
| 0.75023254965500 | 0.24575916832900 | 0.00978794003790 |
| 0.75024063715900 | 0.24575106305200 | 0.34312146828900 |
| 0.75023064750400 | 0.24576221378600 | 0.67647455718300 |
| 0.08363545738380 | 0.24628402812900 | 0.23057607009700 |
| 0.08228815400890 | 0.24483065606100 | 0.56307581418700 |
| 0.08225851984160 | 0.24494579960100 | 0.89629959366200 |
| 0.41547272136100 | 0.24525503433100 | 0.22951767307900 |
| 0.41563523718400 | 0.24508587756300 | 0.56295281145600 |
| 0.41565864053500 | 0.24506415545200 | 0.89625788616500 |
| 0.74896305255400 | 0.24517088843600 | 0.22958681911000 |
| 0.74895361169900 | 0.24505514076300 | 0.56299019348600 |
| 0.74895977900300 | 0.24501625239200 | 0.89632422655000 |
| 0.08449269398480 | 0.24633450239700 | 0.12090316462400 |
| 0.08359729417500 | 0.24713314473200 | 0.45620766583700 |
| 0.08366632778870 | 0.24732434216100 | 0.78961930979200 |
| 0.41636469654800 | 0.24788645245500 | 0.12282151376700 |
| 0.41699768449000 | 0.24732259302900 | 0.45622059701600 |
| 0.41705207496500 | 0.24739397351700 | 0.78961136393600 |
| 0.75053840884200 | 0.24768445020100 | 0.12288564856900 |
| 0.75035339913500 | 0.24743641443600 | 0.45623072575600 |
| 0.75033488211300 | 0.24735715385400 | 0.78958582712900 |
| 0.25011066370300 | 0.24539308066300 | 0.00928990893442 |
| 0.24987557703100 | 0.24605113359500 | 0.34244523260800 |
| 0.24990852067600 | 0.24554802478200 | 0.67617966674900 |
| 0.58321686419200 | 0.24549258242400 | 0.00951403672452 |
| 0.58319306104600 | 0.24551048175800 | 0.34284113660700 |
| 0.58320805792400 | 0.24553953849100 | 0.67620318696700 |
| 0.91636276103700 | 0.24569816490700 | 0.00942824277165 |
| 0.91653956282500 | 0.24545244692600 | 0.34283314383600 |

|                  |                  |                  |
|------------------|------------------|------------------|
| 0.91656023508900 | 0.24548177537900 | 0.67621988187800 |
| 0.24833730814400 | 0.24780627368000 | 0.22956338749200 |
| 0.24948616461900 | 0.24574278892100 | 0.56388472658000 |
| 0.24951701361100 | 0.24576054291300 | 0.89717307731300 |
| 0.58275986771900 | 0.24583962669600 | 0.23049600746100 |
| 0.58280308157800 | 0.24577006260900 | 0.56387142544700 |
| 0.58279598888300 | 0.24580819940100 | 0.89717414207700 |
| 0.91615797673500 | 0.24571388421800 | 0.23054575708100 |
| 0.91614616425800 | 0.24587530470800 | 0.56384105917100 |
| 0.91608914053900 | 0.24582931656000 | 0.89711377747000 |
| 0.24912670066600 | 0.24609613215400 | 0.12026928111500 |
| 0.25329153087900 | 0.24406572920200 | 0.45353479504100 |
| 0.25313769348000 | 0.24420129170700 | 0.78689586170500 |
| 0.58630748619000 | 0.24435626980500 | 0.12020712344300 |
| 0.58645793973000 | 0.24422504261600 | 0.45357658574800 |
| 0.58642054130500 | 0.24426699343400 | 0.78688637526600 |
| 0.92036268603200 | 0.24480271133900 | 0.12018041598100 |
| 0.91978744442500 | 0.24430141880300 | 0.45351921460000 |
| 0.91981215196800 | 0.24408279137300 | 0.78694546914000 |
| 0.12491661757800 | 0.98902323343300 | 0.03093521762340 |
| 0.12508574191600 | 0.98990172432600 | 0.36521950130700 |
| 0.12506015760900 | 0.98976107571200 | 0.69862373153400 |
| 0.45839281104900 | 0.98976719343400 | 0.03198580147510 |
| 0.45835430481100 | 0.98974614184200 | 0.36523415816300 |
| 0.45839113662300 | 0.98974379689200 | 0.69866589303900 |
| 0.79166642523500 | 0.98971028923500 | 0.03199615491230 |
| 0.79172273295500 | 0.98973158105600 | 0.36527971805300 |
| 0.79172376876800 | 0.98974062931600 | 0.69863757472100 |
| 0.12477417705200 | 0.99191670971100 | 0.25274934496200 |
| 0.12446942103100 | 0.99218779598800 | 0.58429040912300 |

|                  |                  |                  |
|------------------|------------------|------------------|
| 0.12444148341600 | 0.99213126146600 | 0.91756274262200 |
| 0.45771332446700 | 0.99222507973900 | 0.25086381674200 |
| 0.45780859886900 | 0.99221416581500 | 0.58428368951800 |
| 0.45780476615700 | 0.99220104106600 | 0.91760062199100 |
| 0.79113382537700 | 0.99218985405700 | 0.25092281299600 |
| 0.79113582788300 | 0.99219048565300 | 0.58428079635600 |
| 0.79114133343800 | 0.99218943549600 | 0.91760758814800 |
| 0.12622046084000 | 0.98957043971000 | 0.14250920115600 |
| 0.12566625754100 | 0.98837393921300 | 0.47573790581000 |
| 0.12573463081500 | 0.98844041813800 | 0.80918021627500 |
| 0.45856087268600 | 0.98846220710200 | 0.14246618593300 |
| 0.45904010546400 | 0.98845932664600 | 0.47585285514900 |
| 0.45912404607900 | 0.98846752636500 | 0.80910867993300 |
| 0.79266427757200 | 0.98847643023200 | 0.14237890595100 |
| 0.79240564022600 | 0.98845267478000 | 0.47582194771100 |
| 0.79240414278600 | 0.98845457805600 | 0.80914978379100 |
| 0.29162147231100 | 0.98890729598800 | 0.03090363216650 |
| 0.29152936754800 | 0.98914981635000 | 0.36440717063800 |
| 0.29155970738600 | 0.98904152212300 | 0.69771588004200 |
| 0.62490236857200 | 0.98912346369200 | 0.03104570665100 |
| 0.62488301732600 | 0.98910205732200 | 0.36437977264700 |
| 0.62488769989500 | 0.98907125254200 | 0.69773345733400 |
| 0.95810313986200 | 0.98914798014500 | 0.03102699929040 |
| 0.95822616510900 | 0.98912924942100 | 0.36435181092900 |
| 0.95822231939000 | 0.98902352867400 | 0.69772450548300 |
| 0.29147094800400 | 0.99127461051100 | 0.25023249831700 |
| 0.29201167259600 | 0.99065571630000 | 0.58402317278700 |
| 0.29202965257500 | 0.99062474215700 | 0.91731744445800 |
| 0.62530986773400 | 0.99064986284100 | 0.25064993937000 |
| 0.62533259738000 | 0.99065986369300 | 0.58401643412000 |

|                  |                  |                  |
|------------------|------------------|------------------|
| 0.62533436881100 | 0.99065131974700 | 0.91732170758900 |
| 0.95869068478400 | 0.99065135942200 | 0.25058921160300 |
| 0.95867592527300 | 0.99066874620100 | 0.58401637527900 |
| 0.95862321064100 | 0.99064213390700 | 0.91729091010000 |
| 0.29124380127400 | 0.99005331830300 | 0.14237085460900 |
| 0.29330795877100 | 0.98878861205600 | 0.47609663831100 |
| 0.29324523502800 | 0.98887881349500 | 0.80942818585000 |
| 0.62652839421800 | 0.98895423833500 | 0.14275485784800 |
| 0.62659367441700 | 0.98886866977600 | 0.47610875961000 |
| 0.62657148683000 | 0.98890047640100 | 0.80943522620000 |
| 0.96086010281600 | 0.98903812610200 | 0.14264842588400 |
| 0.95990672885200 | 0.98893068661000 | 0.47614633200400 |
| 0.95993553119200 | 0.98884778163900 | 0.80943368756300 |
| 0.04173722687130 | 0.98889719042400 | 0.03093634603950 |
| 0.04179861309590 | 0.98923671062200 | 0.36476990584200 |
| 0.04187743407700 | 0.98916913499600 | 0.69797323420700 |
| 0.37518626435600 | 0.98933725575400 | 0.03131184550190 |
| 0.37514471458800 | 0.98919714786500 | 0.36454152899700 |
| 0.37521348970900 | 0.98916934882400 | 0.69797515103900 |
| 0.70852127345000 | 0.98923077205200 | 0.03129950023170 |
| 0.70852894006700 | 0.98919088411600 | 0.36462640955700 |
| 0.70853182717200 | 0.98916531011200 | 0.69797757344800 |
| 0.04047005445150 | 0.99209825236800 | 0.25108678225100 |
| 0.04026271586110 | 0.99181004210300 | 0.58446607735800 |
| 0.04023417333570 | 0.99182341808800 | 0.91775346217500 |
| 0.37339660667000 | 0.99187747237000 | 0.25089480053700 |
| 0.37361426166700 | 0.99183082834300 | 0.58444830759600 |
| 0.37362882526800 | 0.99182286370700 | 0.91775669887300 |
| 0.70693295415500 | 0.99180076512300 | 0.25108985783700 |
| 0.70692826060900 | 0.99181740195900 | 0.58445346647700 |

|                  |                  |                  |
|------------------|------------------|------------------|
| 0.70692953900600 | 0.99181121286800 | 0.91776478824100 |
| 0.04216461950620 | 0.98974454619100 | 0.14261142693900 |
| 0.04048976013330 | 0.98922580440100 | 0.47651592057600 |
| 0.04048978760700 | 0.98932291667700 | 0.80988645179300 |
| 0.37291250829200 | 0.98966666471800 | 0.14303837719000 |
| 0.37384961326200 | 0.98936367136100 | 0.47656637761700 |
| 0.37382074677200 | 0.98934917788900 | 0.80988968410700 |
| 0.70722307817400 | 0.98944244436700 | 0.14322966253000 |
| 0.70716405801400 | 0.98938404565900 | 0.47657204751100 |
| 0.70715593034700 | 0.98933891970400 | 0.80987927588700 |
| 0.20849928344600 | 0.98906763973600 | 0.03093164435480 |
| 0.20838399429300 | 0.98942506962200 | 0.36468348937700 |
| 0.20845096196100 | 0.98927250013600 | 0.69815268746600 |
| 0.54180769685200 | 0.98926665389900 | 0.03149800658900 |
| 0.54175787154100 | 0.98931609480400 | 0.36480680788600 |
| 0.54178255367900 | 0.98929417347400 | 0.69819611755800 |
| 0.87502524544000 | 0.98926601510500 | 0.03154276272990 |
| 0.87511309003100 | 0.98928197107100 | 0.36480421669400 |
| 0.87512067781300 | 0.98925669828900 | 0.69816312215400 |
| 0.20660519909100 | 0.99118371799300 | 0.25199277488900 |
| 0.20620006429500 | 0.99128306419900 | 0.58385747617500 |
| 0.20619853290100 | 0.99123404353800 | 0.91711291055800 |
| 0.53946750231800 | 0.99131881563300 | 0.25043861609900 |
| 0.53952541185300 | 0.99129440931100 | 0.58384378351900 |
| 0.53951273550400 | 0.99127717190700 | 0.91715507895400 |
| 0.87284220014200 | 0.99128184155600 | 0.25045794913200 |
| 0.87285890055500 | 0.99128754890100 | 0.58383502901100 |
| 0.87285192706800 | 0.99128791604100 | 0.91715851563700 |
| 0.20806284287500 | 0.98908642659800 | 0.14242978667400 |
| 0.20683339273200 | 0.99918083883700 | 0.46876157510100 |

|                  |                  |                  |
|------------------|------------------|------------------|
| 0.20671049342500 | 0.99903927909400 | 0.80217473540000 |
| 0.53987070867500 | 0.99890063708300 | 0.13539962566600 |
| 0.54004527098700 | 0.99897354592600 | 0.46877487591900 |
| 0.54001024951900 | 0.99900427909900 | 0.80213320716800 |
| 0.87389471437400 | 0.99878076037400 | 0.13543792379700 |
| 0.87337617327200 | 0.99899400569800 | 0.46878875120300 |
| 0.87338407593800 | 0.99902010129900 | 0.80210384594900 |
| 0.00025812048202 | 0.06466912860800 | 0.08225457758370 |
| 0.00008152426918 | 0.06458767474070 | 0.41572601506700 |
| 0.00015062337545 | 0.06463877987020 | 0.74898836223000 |
| 0.33329500173900 | 0.06451589791360 | 0.08237700306650 |
| 0.33353228425700 | 0.06462556112370 | 0.41566493175400 |
| 0.33348088344600 | 0.06463923632400 | 0.74898699018200 |
| 0.66681900986800 | 0.06458529595040 | 0.08235403648140 |
| 0.66681929952600 | 0.06460881004590 | 0.41567499156900 |
| 0.66681765671600 | 0.06463568719650 | 0.74899673809800 |
| 0.33320097231800 | 0.06354919750130 | 0.30487745949700 |
| 0.33321644135800 | 0.06351602402380 | 0.63832022465700 |
| 0.33322174571700 | 0.06353409379320 | 0.97160340006400 |
| 0.66653558447900 | 0.06352889718080 | 0.30495477599000 |
| 0.66653979132200 | 0.06350895677790 | 0.63832116148000 |
| 0.66653724434900 | 0.06352472824170 | 0.97162147940300 |
| 0.99976926715100 | 0.06358944102190 | 0.30494257550300 |
| 0.99986918115900 | 0.06351363850790 | 0.63832738043200 |
| 0.99978994954400 | 0.06359611526520 | 0.97157013494200 |
| 0.33301895314900 | 0.06741809324310 | 0.19287944204800 |
| 0.33329341781900 | 0.06733864358000 | 0.52629871197000 |
| 0.33331672216600 | 0.06735073790910 | 0.85962683971500 |
| 0.66661699311900 | 0.06731817984340 | 0.19297221063800 |
| 0.66662647348000 | 0.06732537012630 | 0.52630911245900 |

|                  |                  |                  |
|------------------|------------------|------------------|
| 0.66665155411700 | 0.06733980895430 | 0.85963211476000 |
| 0.00021987379766 | 0.06723370606100 | 0.19287043426800 |
| 0.00003475980489 | 0.06732327579480 | 0.52629917165800 |
| 0.99997504849500 | 0.06736208883740 | 0.85961996383600 |
| 0.16676116735900 | 0.06457816705580 | 0.08223018057260 |
| 0.16679051757100 | 0.06196748437860 | 0.41803858696900 |
| 0.16679003559600 | 0.06165806962000 | 0.75159409875300 |
| 0.50005707333800 | 0.06153264133530 | 0.08502395399990 |
| 0.50009522544000 | 0.06163940164050 | 0.41826123963700 |
| 0.50012145266800 | 0.06156612936850 | 0.75168478731300 |
| 0.83346308293000 | 0.06139267093600 | 0.08513288193900 |
| 0.83344188235600 | 0.06161804197350 | 0.41828316815600 |
| 0.83345850876300 | 0.06164334302180 | 0.75160601733900 |
| 0.16652149279600 | 0.06366497667020 | 0.30502280090200 |
| 0.16661169060800 | 0.06320326469660 | 0.63841179082700 |
| 0.16663637762600 | 0.06356929617600 | 0.97152191770400 |
| 0.49989524388700 | 0.06322733109410 | 0.30503848211600 |
| 0.49994312520200 | 0.06318668282710 | 0.63842602978800 |
| 0.49996615292000 | 0.06319566459260 | 0.97174656692400 |
| 0.83326638780900 | 0.06322780728110 | 0.30504922177700 |
| 0.83327369109200 | 0.06320125349400 | 0.63840735685300 |
| 0.83322910502900 | 0.06318645536180 | 0.97176145971100 |
| 0.16652982700100 | 0.06511981927550 | 0.19400215230100 |
| 0.16621968448900 | 0.06702352492480 | 0.52577381008800 |
| 0.16623147757400 | 0.06707066327280 | 0.85912286677900 |
| 0.49945800797100 | 0.06704994128090 | 0.19237896624700 |
| 0.49958791108300 | 0.06704854540490 | 0.52578282881200 |
| 0.49956942590900 | 0.06705773604740 | 0.85911373014400 |
| 0.83298770465500 | 0.06701704057930 | 0.19239383999600 |
| 0.83290430899800 | 0.06703884319260 | 0.52578410688900 |

|                  |                  |                  |
|------------------|------------------|------------------|
| 0.83290852883900 | 0.06705522283280 | 0.85912037698100 |
| 0.08330667636440 | 0.06366619000530 | 0.08305517234680 |
| 0.08364788888990 | 0.06247443067650 | 0.41748831539500 |
| 0.08366888873750 | 0.06238853505260 | 0.75087556847000 |
| 0.41688909529300 | 0.06230822167770 | 0.08421982881210 |
| 0.41699715904900 | 0.06241054516810 | 0.41749920758000 |
| 0.41700417778700 | 0.06238289250950 | 0.75087862293300 |
| 0.75038445732700 | 0.06233952275670 | 0.08422597303900 |
| 0.75034095000300 | 0.06238324911050 | 0.41753225759600 |
| 0.75033443724200 | 0.06240234755500 | 0.75086199975500 |
| 0.08318033440610 | 0.06365504431880 | 0.30499825360600 |
| 0.08336277944040 | 0.06340618450940 | 0.63808487579500 |
| 0.08330437254570 | 0.06372573816240 | 0.97119282659500 |
| 0.41665638068100 | 0.06344242635070 | 0.30469365623800 |
| 0.41670618953400 | 0.06339054539920 | 0.63809381386300 |
| 0.41672965617400 | 0.06336533209330 | 0.97141165391300 |
| 0.75002648276900 | 0.06340726052150 | 0.30473842256900 |
| 0.75003223614200 | 0.06338962218360 | 0.63808728336700 |
| 0.75002235434200 | 0.06339635780250 | 0.97141262707600 |
| 0.08359057435430 | 0.06445318147060 | 0.19347248544400 |
| 0.08385575398620 | 0.06523853347910 | 0.52630505449000 |
| 0.08382545137350 | 0.06528129494280 | 0.85963919763500 |
| 0.41695547341200 | 0.06527486693310 | 0.19295129209800 |
| 0.41714486408000 | 0.06528596415840 | 0.52632871202200 |
| 0.41716075144700 | 0.06529892256510 | 0.85964997879500 |
| 0.75049908757000 | 0.06529819140260 | 0.19300099000300 |
| 0.75048500968900 | 0.06527022939330 | 0.52634063045600 |
| 0.75047847532600 | 0.06528827136100 | 0.85966214034300 |
| 0.25019661223100 | 0.06390956298700 | 0.08268955301090 |
| 0.25017989584700 | 0.06458800742990 | 0.41577882430800 |



|                  |                  |                  |
|------------------|------------------|------------------|
| 0.25015158666900 | 0.06455526219300 | 0.74913156447500 |
| 0.58341466976300 | 0.06452670099890 | 0.08247611290160 |
| 0.58346766967100 | 0.06454432038990 | 0.41581610556000 |
| 0.58347009278300 | 0.06454926263210 | 0.74913894031200 |
| 0.91688085860900 | 0.06437977152640 | 0.08256695465720 |
| 0.91677369813300 | 0.06454358153680 | 0.41580075818200 |
| 0.91682815465700 | 0.06456458083150 | 0.74912990139800 |
| 0.25014057280500 | 0.06364461804390 | 0.30451362864000 |
| 0.25014967843100 | 0.06331614309470 | 0.63770987998500 |
| 0.25017022637400 | 0.06349351374780 | 0.97090129866800 |
| 0.58345049135500 | 0.06331221827490 | 0.30435015086900 |
| 0.58347482323000 | 0.06329397253080 | 0.63771300040800 |
| 0.58347422011600 | 0.06331271040660 | 0.97102584501200 |
| 0.91676060855000 | 0.06333683567880 | 0.30433231809700 |
| 0.91680606257200 | 0.06330845559470 | 0.63770932287000 |
| 0.91673884974900 | 0.06329465163650 | 0.97102248652300 |
| 0.24938628238500 | 0.06455859745460 | 0.19337277096400 |
| 0.25007169271600 | 0.06438082352830 | 0.52689223438300 |
| 0.25007064571200 | 0.06440803170290 | 0.86021430297400 |
| 0.58331179081700 | 0.06440076902140 | 0.19353976377100 |
| 0.58337110205700 | 0.06438249997700 | 0.52689055053400 |
| 0.58340270823900 | 0.06442195736240 | 0.86022660269600 |
| 0.91688637534900 | 0.06439361772610 | 0.19350304798300 |
| 0.91671859673300 | 0.06438484005910 | 0.52690252062100 |
| 0.91671918722700 | 0.06440947591890 | 0.86020238117300 |
| 0.12500000000200 | 0.13043999660500 | 0.02777666599470 |
| 0.12500000000200 | 0.13043999660500 | 0.36110999932900 |
| 0.12500000000200 | 0.13043999660500 | 0.69444333266100 |
| 0.45833333333600 | 0.13043999660500 | 0.02777666599470 |
| 0.45833333333600 | 0.13043999660500 | 0.36110999932900 |

|                  |                  |                  |
|------------------|------------------|------------------|
| 0.45833333333600 | 0.13043999660500 | 0.69444333266100 |
| 0.79166666666800 | 0.13043999660500 | 0.02777666599470 |
| 0.79166666666800 | 0.13043999660500 | 0.36110999932900 |
| 0.79166666666800 | 0.13043999660500 | 0.69444333266100 |
| 0.12500000000200 | 0.13043999660500 | 0.2499999995100  |
| 0.12500000000200 | 0.13043999660500 | 0.5833333328300  |
| 0.12500000000200 | 0.13043999660500 | 0.9166666661500  |
| 0.45833333333600 | 0.13043999660500 | 0.2499999995100  |
| 0.45833333333600 | 0.13043999660500 | 0.5833333328300  |
| 0.45833333333600 | 0.13043999660500 | 0.9166666661500  |
| 0.79166666666800 | 0.13043999660500 | 0.2499999995100  |
| 0.79166666666800 | 0.13043999660500 | 0.5833333328300  |
| 0.79166666666800 | 0.13043999660500 | 0.9166666661500  |
| 0.12500000000200 | 0.13043999660500 | 0.13888999819000 |
| 0.12500000000200 | 0.13043999660500 | 0.47222333152400 |
| 0.12500000000200 | 0.13043999660500 | 0.80555666485600 |
| 0.45833333333600 | 0.13043999660500 | 0.13888999819000 |
| 0.45833333333600 | 0.13043999660500 | 0.47222333152400 |
| 0.45833333333600 | 0.13043999660500 | 0.80555666485600 |
| 0.79166666666800 | 0.13043999660500 | 0.13888999819000 |
| 0.79166666666800 | 0.13043999660500 | 0.47222333152400 |
| 0.79166666666800 | 0.13043999660500 | 0.80555666485600 |
| 0.29166666669900 | 0.13043999660500 | 0.02777666599470 |
| 0.29166666669900 | 0.13043999660500 | 0.36110999932900 |
| 0.29166666669900 | 0.13043999660500 | 0.69444333266100 |
| 0.62500000003300 | 0.13043999660500 | 0.02777666599470 |
| 0.62500000003300 | 0.13043999660500 | 0.36110999932900 |
| 0.62500000003300 | 0.13043999660500 | 0.69444333266100 |
| 0.95833333336500 | 0.13043999660500 | 0.02777666599470 |
| 0.95833333336500 | 0.13043999660500 | 0.36110999932900 |

|                  |                  |                  |
|------------------|------------------|------------------|
| 0.95833333336500 | 0.13043999660500 | 0.69444333266100 |
| 0.29166666669900 | 0.13043999660500 | 0.2499999995100  |
| 0.29166666669900 | 0.13043999660500 | 0.5833333328300  |
| 0.29166666669900 | 0.13043999660500 | 0.9166666661500  |
| 0.6250000003300  | 0.13043999660500 | 0.2499999995100  |
| 0.6250000003300  | 0.13043999660500 | 0.5833333328300  |
| 0.6250000003300  | 0.13043999660500 | 0.9166666661500  |
| 0.95833333336500 | 0.13043999660500 | 0.2499999995100  |
| 0.95833333336500 | 0.13043999660500 | 0.5833333328300  |
| 0.95833333336500 | 0.13043999660500 | 0.9166666661500  |
| 0.29166666669900 | 0.13043999660500 | 0.13888999819000 |
| 0.29166666669900 | 0.13043999660500 | 0.47222333152400 |
| 0.29166666669900 | 0.13043999660500 | 0.80555666485600 |
| 0.6250000003300  | 0.13043999660500 | 0.13888999819000 |
| 0.6250000003300  | 0.13043999660500 | 0.47222333152400 |
| 0.6250000003300  | 0.13043999660500 | 0.80555666485600 |
| 0.95833333336500 | 0.13043999660500 | 0.13888999819000 |
| 0.95833333336500 | 0.13043999660500 | 0.47222333152400 |
| 0.95833333336500 | 0.13043999660500 | 0.80555666485600 |
| 0.04166666667330 | 0.13043999660500 | 0.02777666599470 |
| 0.04166666667330 | 0.13043999660500 | 0.36110999932900 |
| 0.04166666667330 | 0.13043999660500 | 0.69444333266100 |
| 0.3750000000700  | 0.13043999660500 | 0.02777666599470 |
| 0.3750000000700  | 0.13043999660500 | 0.36110999932900 |
| 0.3750000000700  | 0.13043999660500 | 0.69444333266100 |
| 0.70833333334100 | 0.13043999660500 | 0.02777666599470 |
| 0.70833333334100 | 0.13043999660500 | 0.36110999932900 |
| 0.70833333334100 | 0.13043999660500 | 0.69444333266100 |
| 0.04166666667330 | 0.13043999660500 | 0.2499999995100  |
| 0.04166666667330 | 0.13043999660500 | 0.5833333328300  |

|                  |                  |                  |
|------------------|------------------|------------------|
| 0.04166666667330 | 0.13043999660500 | 0.91666666661500 |
| 0.37500000000700 | 0.13043999660500 | 0.24999999995100 |
| 0.37500000000700 | 0.13043999660500 | 0.58333333328300 |
| 0.37500000000700 | 0.13043999660500 | 0.91666666661500 |
| 0.7083333334100  | 0.13043999660500 | 0.24999999995100 |
| 0.7083333334100  | 0.13043999660500 | 0.58333333328300 |
| 0.7083333334100  | 0.13043999660500 | 0.91666666661500 |
| 0.04166666667330 | 0.13043999660500 | 0.13888999819000 |
| 0.04166666667330 | 0.13043999660500 | 0.47222333152400 |
| 0.04166666667330 | 0.13043999660500 | 0.80555666485600 |
| 0.37500000000700 | 0.13043999660500 | 0.13888999819000 |
| 0.37500000000700 | 0.13043999660500 | 0.47222333152400 |
| 0.37500000000700 | 0.13043999660500 | 0.80555666485600 |
| 0.7083333334100  | 0.13043999660500 | 0.13888999819000 |
| 0.7083333334100  | 0.13043999660500 | 0.47222333152400 |
| 0.7083333334100  | 0.13043999660500 | 0.80555666485600 |
| 0.2083333332800  | 0.13043999660500 | 0.02777666599470 |
| 0.2083333332800  | 0.13043999660500 | 0.36110999932900 |
| 0.2083333332800  | 0.13043999660500 | 0.69444333266100 |
| 0.5416666666100  | 0.13043999660500 | 0.02777666599470 |
| 0.5416666666100  | 0.13043999660500 | 0.36110999932900 |
| 0.5416666666100  | 0.13043999660500 | 0.69444333266100 |
| 0.8749999999500  | 0.13043999660500 | 0.02777666599470 |
| 0.8749999999500  | 0.13043999660500 | 0.36110999932900 |
| 0.8749999999500  | 0.13043999660500 | 0.69444333266100 |
| 0.2083333332800  | 0.13043999660500 | 0.24999999995100 |
| 0.2083333332800  | 0.13043999660500 | 0.58333333328300 |
| 0.2083333332800  | 0.13043999660500 | 0.91666666661500 |
| 0.5416666666100  | 0.13043999660500 | 0.24999999995100 |
| 0.5416666666100  | 0.13043999660500 | 0.58333333328300 |

|                  |                  |                  |
|------------------|------------------|------------------|
| 0.5416666666100  | 0.13043999660500 | 0.91666666661500 |
| 0.8749999999500  | 0.13043999660500 | 0.24999999995100 |
| 0.8749999999500  | 0.13043999660500 | 0.58333333328300 |
| 0.8749999999500  | 0.13043999660500 | 0.91666666661500 |
| 0.2083333332800  | 0.13043999660500 | 0.13888999819000 |
| 0.2083333332800  | 0.13043999660500 | 0.47222333152400 |
| 0.2083333332800  | 0.13043999660500 | 0.80555666485600 |
| 0.5416666666100  | 0.13043999660500 | 0.13888999819000 |
| 0.5416666666100  | 0.13043999660500 | 0.47222333152400 |
| 0.5416666666100  | 0.13043999660500 | 0.80555666485600 |
| 0.8749999999500  | 0.13043999660500 | 0.13888999819000 |
| 0.8749999999500  | 0.13043999660500 | 0.47222333152400 |
| 0.8749999999500  | 0.13043999660500 | 0.80555666485600 |
| 0.00026204467709 | 0.19623344506900 | 0.08227944913620 |
| 0.00008549481459 | 0.19631361923400 | 0.41574586178700 |
| 0.00015784407835 | 0.19625838747400 | 0.74900771319900 |
| 0.33329983838300 | 0.19639060633900 | 0.08240154869030 |
| 0.33353825464700 | 0.19627223392300 | 0.41568374245400 |
| 0.33348687158500 | 0.19625935719800 | 0.74900719967500 |
| 0.66682455761100 | 0.19631535431400 | 0.08237436881240 |
| 0.66682465175900 | 0.19629122218900 | 0.41569537978500 |
| 0.66682306025800 | 0.19626181585300 | 0.74901539776300 |
| 0.33319197010500 | 0.19734769029500 | 0.30488822999400 |
| 0.33321039269200 | 0.19737949899600 | 0.63832854200500 |
| 0.33321467734000 | 0.19736296168700 | 0.97161198467800 |
| 0.66652880907200 | 0.19736907939700 | 0.30496463875800 |
| 0.66653328092600 | 0.19738726843700 | 0.63833039404900 |
| 0.66652989553600 | 0.19737351260100 | 0.97163088222900 |
| 0.99976382410900 | 0.19730493565800 | 0.30494966835500 |
| 0.99986317819800 | 0.19738125514600 | 0.63833568097400 |

|                  |                  |                  |
|------------------|------------------|------------------|
| 0.99977923889000 | 0.19729859180100 | 0.97157620541700 |
| 0.33303784044300 | 0.19358387688900 | 0.19294669733900 |
| 0.33331416935500 | 0.19368980798700 | 0.52638203328800 |
| 0.33333745377100 | 0.19367678882200 | 0.85970977728800 |
| 0.66663827797700 | 0.19370459712000 | 0.19305199187500 |
| 0.66664852544900 | 0.19370111949700 | 0.52639083261700 |
| 0.66667310143900 | 0.19368591094000 | 0.85971458402600 |
| 0.00024089942496 | 0.19377256048400 | 0.19294576287000 |
| 0.00005515921810 | 0.19370381664500 | 0.52638151582300 |
| 0.99999504064300 | 0.19366711189400 | 0.85970338610300 |
| 0.16676597214200 | 0.19632060279400 | 0.08225096964560 |
| 0.16678979963200 | 0.19889748606600 | 0.41803318311700 |
| 0.16679249909500 | 0.19918020153200 | 0.75158321928800 |
| 0.50005832598900 | 0.19932389465900 | 0.08501846112430 |
| 0.50009759926900 | 0.19919845422000 | 0.41825003693700 |
| 0.50012387653700 | 0.19928799376100 | 0.75167966519200 |
| 0.83346648571800 | 0.19947113468400 | 0.08512243500580 |
| 0.83344421897500 | 0.19922053110200 | 0.41827410161600 |
| 0.83346052678500 | 0.19919163192600 | 0.75159468897600 |
| 0.16652458463600 | 0.19723131491500 | 0.30502901018200 |
| 0.16661538039200 | 0.19769192308400 | 0.63843693102600 |
| 0.16664001126200 | 0.19732278583900 | 0.97154231918800 |
| 0.49989678737400 | 0.19766755439100 | 0.30506265941800 |
| 0.49994570889300 | 0.19770829907700 | 0.63845141912400 |
| 0.49996784126300 | 0.19769914915900 | 0.97177121531300 |
| 0.83326900514900 | 0.19766698251600 | 0.30507418762700 |
| 0.83327667842100 | 0.19769254980800 | 0.63843210068600 |
| 0.83323139727300 | 0.19770985933800 | 0.97178751373800 |
| 0.16652582540300 | 0.19585065516700 | 0.19404961245700 |
| 0.16623264979000 | 0.19378438924400 | 0.52574720849200 |

|                  |                  |                  |
|------------------|------------------|------------------|
| 0.16624558025300 | 0.19373737593600 | 0.85909552767000 |
| 0.49947143397200 | 0.19375862947300 | 0.19235340489400 |
| 0.49960173063900 | 0.19376011346800 | 0.52575615883200 |
| 0.49958313435600 | 0.19375009191500 | 0.85908746938000 |
| 0.83300071719400 | 0.19378914997200 | 0.19236535679900 |
| 0.83291785931900 | 0.19376953681200 | 0.52575736671400 |
| 0.83292187312900 | 0.19375409868500 | 0.85909383199100 |
| 0.08330989015650 | 0.19723304691700 | 0.08307217267180 |
| 0.08365339476980 | 0.19840077661700 | 0.41748773338500 |
| 0.08367693215310 | 0.19848441686100 | 0.75087346706700 |
| 0.41689594592600 | 0.19856080274900 | 0.08421592611710 |
| 0.41700493750200 | 0.19846236443300 | 0.41749643268300 |
| 0.41701162925300 | 0.19848970502100 | 0.75087680907700 |
| 0.75039226066000 | 0.19853363020600 | 0.08422517008600 |
| 0.75034816156200 | 0.19848988029700 | 0.41753028879200 |
| 0.75034152853000 | 0.19847088366300 | 0.75086017602100 |
| 0.08316377734500 | 0.19722155372000 | 0.30501257593200 |
| 0.08334578189080 | 0.19748268096700 | 0.63810584937900 |
| 0.08328454611880 | 0.19715657078100 | 0.97120783850100 |
| 0.41663751722300 | 0.19744670753000 | 0.30471452230800 |
| 0.41668869109000 | 0.19749840852300 | 0.63811533753500 |
| 0.41671106398100 | 0.19752591585300 | 0.97143425030600 |
| 0.75000843117600 | 0.19748118938700 | 0.30475983973500 |
| 0.75001447559600 | 0.19749873803600 | 0.63810857714100 |
| 0.75000462182100 | 0.19749276987400 | 0.97143499249200 |
| 0.08357066402930 | 0.19650121968500 | 0.19350869774300 |
| 0.08382903436750 | 0.19569161436900 | 0.52634117952400 |
| 0.08379941609890 | 0.19564640949800 | 0.85967423069400 |
| 0.41692795986900 | 0.19565025784500 | 0.19298246123100 |
| 0.41711883496000 | 0.19564420550800 | 0.52636475027300 |

|                  |                  |                  |
|------------------|------------------|------------------|
| 0.41713523545500 | 0.19562851196100 | 0.85968546528400 |
| 0.75047295153300 | 0.19562907478500 | 0.19303406711400 |
| 0.75045814184300 | 0.19565890518900 | 0.52637554320000 |
| 0.75045279161100 | 0.19564191287900 | 0.85969795126400 |
| 0.25019888296700 | 0.19699303329700 | 0.08271085701540 |
| 0.25018412842600 | 0.19630071053600 | 0.41579031622100 |
| 0.25015225595600 | 0.19633482566000 | 0.74914329954000 |
| 0.58341558837400 | 0.19636218350300 | 0.08248696205290 |
| 0.58346934259500 | 0.19634523694200 | 0.41582711276500 |
| 0.58347109781900 | 0.19633936602300 | 0.74914895144100 |
| 0.91688289934100 | 0.19651016070500 | 0.08257856681590 |
| 0.91677429916200 | 0.19634483815000 | 0.41581126660400 |
| 0.91682867070800 | 0.19632561365700 | 0.74914195060500 |
| 0.25012919226700 | 0.19726030821400 | 0.30450938819300 |
| 0.25015800245600 | 0.19758152054200 | 0.63771636195300 |
| 0.25017998508500 | 0.19740295769500 | 0.97090606713200 |
| 0.58345781432600 | 0.19758527736800 | 0.30435673755500 |
| 0.58348216322700 | 0.19760329138500 | 0.63772008054400 |
| 0.58348254629900 | 0.19758445771000 | 0.97103226921400 |
| 0.91676993677100 | 0.19755938052400 | 0.30433807991500 |
| 0.91681363567900 | 0.19758776450200 | 0.63771537246500 |
| 0.91674458691500 | 0.19760535157000 | 0.97102993388400 |
| 0.24939842206700 | 0.19632882362700 | 0.19336499317300 |
| 0.25008746584400 | 0.19649701438100 | 0.52688527074000 |
| 0.25008694960400 | 0.19646836218800 | 0.86020619990300 |
| 0.58332671372800 | 0.19647779467700 | 0.19353211876900 |
| 0.58338755707000 | 0.19649604045500 | 0.52688345736400 |
| 0.58341871434400 | 0.19645538384900 | 0.86021868860400 |
| 0.91689986728600 | 0.19648576992300 | 0.19349838269800 |
| 0.91673453090400 | 0.19649398901100 | 0.52689495419200 |



|                  |                  |                  |
|------------------|------------------|------------------|
| 0.91673471184200 | 0.19646890864600 | 0.86019524026700 |
| 0.12491494369200 | 0.27183913005600 | 0.03095578869960 |
| 0.12508428299100 | 0.27101371371000 | 0.36522741094400 |
| 0.12505961114200 | 0.27115897482600 | 0.69863711433300 |
| 0.45839145063600 | 0.27115371919200 | 0.03199990241890 |
| 0.45835349661500 | 0.27117272240600 | 0.36524661998800 |
| 0.45839049283400 | 0.27117651373300 | 0.69868057340700 |
| 0.79166469956800 | 0.27120601704300 | 0.03201305219790 |
| 0.79172210299200 | 0.27118695207600 | 0.36529383159900 |
| 0.79172346206400 | 0.27117896223500 | 0.69865172603100 |
| 0.12470884448600 | 0.26888593512900 | 0.25282569316300 |
| 0.12444896640600 | 0.26849394139400 | 0.58429091423000 |
| 0.12442061838600 | 0.26855255546000 | 0.91756168435600 |
| 0.45769415857200 | 0.26845749463200 | 0.25086289773500 |
| 0.45778787762200 | 0.26846703010300 | 0.58428353777100 |
| 0.45778423354800 | 0.26848155669000 | 0.91760066116400 |
| 0.79111172215800 | 0.26848997253900 | 0.25092120163800 |
| 0.79111443365800 | 0.26848962590300 | 0.58428033431200 |
| 0.79112030762900 | 0.26849097060300 | 0.91760890510500 |
| 0.12622063411400 | 0.27135344591900 | 0.14251379661100 |
| 0.12566741741700 | 0.27243856774100 | 0.47575285672900 |
| 0.12573930754900 | 0.27237270758400 | 0.80918855185500 |
| 0.45856346900700 | 0.27234989234600 | 0.14247608725500 |
| 0.45904437950100 | 0.27235442585100 | 0.47586120840800 |
| 0.45912941558200 | 0.27234793391500 | 0.80911789079800 |
| 0.79266848232100 | 0.27233928200700 | 0.14238860822400 |
| 0.79241054529000 | 0.27236148976000 | 0.47583048818200 |
| 0.79240904721200 | 0.27235925306800 | 0.80915765418800 |
| 0.29161955803400 | 0.27194497307900 | 0.03092481632460 |
| 0.29153110971700 | 0.27171167337400 | 0.36442593093200 |

|                  |                  |                  |
|------------------|------------------|------------------|
| 0.29156094150700 | 0.27181664297100 | 0.69773596207800 |
| 0.62490083206900 | 0.27173767990100 | 0.03106595070090 |
| 0.62488180959000 | 0.27175971187200 | 0.36439925515000 |
| 0.62488673516700 | 0.27178938175700 | 0.69775260596400 |
| 0.95810526823500 | 0.27170798484500 | 0.03104696767570 |
| 0.95822488074100 | 0.27173304602400 | 0.36436985036400 |
| 0.95822104742100 | 0.27183104045500 | 0.69774376521100 |
| 0.29146850795200 | 0.26962647990500 | 0.25020130752000 |
| 0.29200408952500 | 0.27026231671500 | 0.58399835437800 |
| 0.29202257355200 | 0.27029190888400 | 0.91729107976100 |
| 0.62530154676000 | 0.27026400144700 | 0.25062333201400 |
| 0.62532562897400 | 0.27025730481400 | 0.58399142427600 |
| 0.62532604623300 | 0.27026472212300 | 0.91729521309300 |
| 0.95868255326100 | 0.27026967523900 | 0.25056723995900 |
| 0.95866806651100 | 0.27024797786800 | 0.58399198085700 |
| 0.95861467399200 | 0.27028260878600 | 0.91726405467700 |
| 0.29126238868500 | 0.27089374819500 | 0.14240049568500 |
| 0.29333003849900 | 0.27210491459100 | 0.47613155585700 |
| 0.29326706275000 | 0.27201848299100 | 0.80946302765000 |
| 0.62654903700600 | 0.27194653248000 | 0.14278994678700 |
| 0.62661427958500 | 0.27203068643600 | 0.47614498119700 |
| 0.62659297287000 | 0.27199519430900 | 0.80947002596300 |
| 0.96087371277100 | 0.27186555350100 | 0.14268825621500 |
| 0.95992653031900 | 0.27197013767000 | 0.47618172288500 |
| 0.95995793279100 | 0.27204864885400 | 0.80946807021300 |
| 0.04173812211470 | 0.27195351544800 | 0.03095257676390 |
| 0.04179755943770 | 0.27163240536500 | 0.36478262805500 |
| 0.04187547786680 | 0.27169990321000 | 0.69799000953200 |
| 0.37518250766700 | 0.27154039659800 | 0.03133023786420 |
| 0.37514537348100 | 0.27167401521700 | 0.36456008769600 |

|                  |                  |                  |
|------------------|------------------|------------------|
| 0.37521253996700 | 0.27169868742000 | 0.69799269647300 |
| 0.70851950039400 | 0.27163902611800 | 0.03131800582350 |
| 0.70852785426000 | 0.27168001536200 | 0.36464437389600 |
| 0.70853065767500 | 0.27170423328300 | 0.69799509299200 |
| 0.04042992612770 | 0.26896101028100 | 0.25120734362000 |
| 0.04023501783810 | 0.26922807189000 | 0.58457721516200 |
| 0.04020657039370 | 0.26921794588000 | 0.91786081029900 |
| 0.37337416980800 | 0.26912447145500 | 0.25098297595800 |
| 0.37358637706700 | 0.26921026227600 | 0.58455871413100 |
| 0.37360167774800 | 0.26921500373900 | 0.91786733385700 |
| 0.70690532963700 | 0.26923063369200 | 0.25119794383700 |
| 0.70690001163500 | 0.26922152520800 | 0.58456314757800 |
| 0.70690179820000 | 0.26922491929500 | 0.91787494351300 |
| 0.04217799168540 | 0.27117746668000 | 0.14263247956400 |
| 0.04051332032310 | 0.27166019612600 | 0.47653475382300 |
| 0.04051434274070 | 0.27156592004800 | 0.80990555477800 |
| 0.37293723740700 | 0.27124151929700 | 0.14305337789400 |
| 0.37387269750800 | 0.27152613548800 | 0.47658487068100 |
| 0.37384488289900 | 0.27154085277200 | 0.80990913355300 |
| 0.70724649006600 | 0.27145489342400 | 0.14324785264100 |
| 0.70718697619400 | 0.27151168823900 | 0.47658982330200 |
| 0.70717903903700 | 0.27155133444200 | 0.80989804533700 |
| 0.20850313873600 | 0.27178775934400 | 0.03095185467270 |
| 0.20838728025300 | 0.27144940942700 | 0.36469900979600 |
| 0.20845806607400 | 0.27160870337100 | 0.69816949743100 |
| 0.54181314147200 | 0.27161234415100 | 0.03151467136350 |
| 0.54176250205400 | 0.27156629606600 | 0.36482384337100 |
| 0.54178838135600 | 0.27158932649800 | 0.69821347455200 |
| 0.87503115527000 | 0.27161285842400 | 0.03156338383440 |
| 0.87511887308700 | 0.27159869626700 | 0.36482164037200 |

|                  |                  |                  |
|------------------|------------------|------------------|
| 0.87512604222400 | 0.27162323993700 | 0.69818061956700 |
| 0.20660547332900 | 0.26977340075900 | 0.25198410213600 |
| 0.20619081091300 | 0.26947199133400 | 0.58383916802700 |
| 0.20618912801600 | 0.26952198839000 | 0.91709180827800 |
| 0.53945748922200 | 0.26943892575400 | 0.25042125224800 |
| 0.53951610068200 | 0.26945977141400 | 0.58382582668600 |
| 0.53950403178500 | 0.26947683590400 | 0.91713664572700 |
| 0.87283146371600 | 0.26947529030300 | 0.25044009138700 |
| 0.87284941762300 | 0.26946684587000 | 0.58381672126200 |
| 0.87284153408500 | 0.26946803907800 | 0.91714080460400 |
| 0.20807653300400 | 0.27182151984300 | 0.14243817001600 |
| 0.20686170225900 | 0.26170597280600 | 0.46875368287400 |
| 0.20673787803100 | 0.26184967066500 | 0.80216499092600 |
| 0.53989516887200 | 0.26199258459700 | 0.13539005880000 |
| 0.54007356564900 | 0.26191583065100 | 0.46876571410200 |
| 0.54003504198300 | 0.26188807884100 | 0.80212284433400 |
| 0.87391772966400 | 0.26211892665400 | 0.13543013896200 |
| 0.87340309204500 | 0.26189567990900 | 0.46877934387900 |
| 0.87341197301900 | 0.26186803497600 | 0.80209455270800 |
| 0.19031535660500 | 0.38091207185700 | 0.22445249924700 |
| 0.19082511249000 | 0.38030961132600 | 0.56064559413500 |
| 0.19084456287200 | 0.38026706687000 | 0.89396633215000 |
| 0.52413226873100 | 0.38031344505200 | 0.22732200040500 |
| 0.52414603064600 | 0.38029008115700 | 0.56064311762500 |
| 0.52415490620400 | 0.38028945772600 | 0.89396417131200 |
| 0.85750919148600 | 0.38029839064200 | 0.22732204595500 |
| 0.85748055605100 | 0.38030643973000 | 0.56064688723100 |
| 0.85747124606200 | 0.38030060774600 | 0.89396434508400 |
| 0.20732522457500 | 0.37756939404500 | 0.16352513206100 |
| 0.21336263545100 | 0.29894699299500 | 0.48836832059600 |

|                  |                  |                  |
|------------------|------------------|------------------|
| 0.21359044528000 | 0.29884238704900 | 0.82185956251600 |
| 0.54697533472600 | 0.29884044917000 | 0.15511693499600 |
| 0.54696016518400 | 0.29885457732500 | 0.48848555770200 |
| 0.54703642143700 | 0.29881773714900 | 0.82182004223500 |
| 0.88073893099100 | 0.29885994493900 | 0.15530999331600 |
| 0.88031266446900 | 0.29884278827100 | 0.48848826002900 |
| 0.88026668699600 | 0.29886132515000 | 0.82178811158700 |
| 0.22343407504200 | 0.34321035017100 | 0.23785217964100 |
| 0.22342631847200 | 0.34106422245200 | 0.57083933294100 |
| 0.22345177227900 | 0.34108190516000 | 0.90413311074500 |
| 0.55674436996200 | 0.34106281956300 | 0.23746982969200 |
| 0.55674755341500 | 0.34102746080500 | 0.57081103519200 |
| 0.55675704405600 | 0.34104277763800 | 0.90412149415900 |
| 0.89013064896800 | 0.34105588698500 | 0.23743666225100 |
| 0.89007966861300 | 0.34105286023600 | 0.57082321782200 |
| 0.89007451541500 | 0.34105692638200 | 0.90415707390400 |
| 0.16483226812900 | 0.37148842191400 | 0.24279972707100 |
| 0.16463594782600 | 0.36473061253900 | 0.58219159199500 |
| 0.16465006959800 | 0.36472679916600 | 0.91547415203800 |
| 0.49792266102700 | 0.36470749684600 | 0.24889285662600 |
| 0.49796015334500 | 0.36469524767900 | 0.58220384150000 |
| 0.49796584354800 | 0.36470203591600 | 0.91551480165400 |
| 0.83130426002900 | 0.36475527687700 | 0.24885387579500 |
| 0.83129468191600 | 0.36470893175000 | 0.58220268928300 |
| 0.83128690916200 | 0.36469318943100 | 0.91553544131200 |
| 0.16549181160800 | 0.34310209130700 | 0.21180253839000 |
| 0.16382498910400 | 0.35819243710800 | 0.54788108889400 |
| 0.16383763252100 | 0.35812410002200 | 0.88119399316100 |
| 0.49711154639500 | 0.35828435949200 | 0.21454827837000 |
| 0.49714656909400 | 0.35817678525500 | 0.54787855944900 |

|                  |                  |                  |
|------------------|------------------|------------------|
| 0.49715661705700 | 0.35815960655900 | 0.88119280306000 |
| 0.83049106843500 | 0.35819698715900 | 0.21455165260800 |
| 0.83048616887600 | 0.35818768866200 | 0.54788356531700 |
| 0.83048015491200 | 0.35816579877000 | 0.88119821324000 |
| 0.17809845164800 | 0.33395670824400 | 0.27424637492400 |
| 0.17792045849900 | 0.32735626659000 | 0.60540861356000 |
| 0.17792915698600 | 0.32732948619400 | 0.93872328143800 |
| 0.51117197398800 | 0.32733464738400 | 0.27209792884000 |
| 0.51124889797300 | 0.32733614793400 | 0.60541554667600 |
| 0.51124933911400 | 0.32734435429700 | 0.93873443098200 |
| 0.84456386842800 | 0.32739107815200 | 0.27209942109200 |
| 0.84458080982000 | 0.32735457962300 | 0.60542168160300 |
| 0.84457365524200 | 0.32736947109300 | 0.93875097355100 |
| 0.14652431139100 | 0.33269498849200 | 0.27183363224000 |
| 0.14575689195600 | 0.32610241531700 | 0.60194726421500 |
| 0.14576500094100 | 0.32610929128800 | 0.93528968793100 |
| 0.47901184130100 | 0.32603339764300 | 0.26854796712600 |
| 0.47908109103900 | 0.32606076797600 | 0.60193466274000 |
| 0.47908473057800 | 0.32609074804400 | 0.93527017836600 |
| 0.81240670408400 | 0.32613372267500 | 0.26861182576400 |
| 0.81241501200200 | 0.32607872175900 | 0.60194195638800 |
| 0.81241241136800 | 0.32606145064800 | 0.93525699605600 |
| 0.23293578658400 | 0.39198715378400 | 0.24175877169700 |
| 0.23401150192900 | 0.39019931698300 | 0.57261866535100 |
| 0.23399815830400 | 0.39022961430700 | 0.90596267387400 |
| 0.56729636754400 | 0.39019698524000 | 0.23937448836700 |
| 0.56731764452900 | 0.39016169228400 | 0.57268329989400 |
| 0.56730793476500 | 0.39017463732300 | 0.90602015592000 |
| 0.90069714330400 | 0.39019124753400 | 0.23929541990500 |
| 0.90066583707600 | 0.39018186536500 | 0.57266146748000 |

|                  |                  |                  |
|------------------|------------------|------------------|
| 0.90063973254000 | 0.39018441033400 | 0.90601914073900 |
| 0.15276776475700 | 0.30639636905600 | 0.18647264185900 |
| 0.14608131999800 | 0.29819062916300 | 0.51545300418900 |
| 0.14601651369700 | 0.29814637136000 | 0.84874492989300 |
| 0.47918983001600 | 0.29825761355000 | 0.18214784597700 |
| 0.47934544365400 | 0.29814317333300 | 0.51544345314600 |
| 0.47934059029300 | 0.29814046318500 | 0.84873611704700 |
| 0.81267580292100 | 0.29816271465700 | 0.18204691691700 |
| 0.81267975235000 | 0.29816687975700 | 0.51544201339000 |
| 0.81268523121900 | 0.29814481877100 | 0.84875644810600 |
| 0.20526796859700 | 0.40154294420100 | 0.16684527899200 |
| 0.17815771168300 | 0.30216245323300 | 0.51695913873900 |
| 0.17811183838900 | 0.30210840964700 | 0.85024722847000 |
| 0.51129635757100 | 0.30209911181400 | 0.18348065574600 |
| 0.51143594392800 | 0.30214742338600 | 0.51693608713100 |
| 0.51143230793700 | 0.30212996218000 | 0.85023706249900 |
| 0.84477557665200 | 0.30224066643500 | 0.18361943512400 |
| 0.84476843273700 | 0.30214828927900 | 0.51693181029500 |
| 0.84477775773900 | 0.30211916028400 | 0.85024405354400 |
| 0.19063613552400 | 0.88042627498300 | 0.22427097547300 |
| 0.19103759506800 | 0.88044037776400 | 0.56054746097200 |
| 0.19105545377100 | 0.88048480365400 | 0.89386941410700 |
| 0.52435615926800 | 0.88043657675100 | 0.22721398895800 |
| 0.52436318808000 | 0.88045887928900 | 0.56054022988600 |
| 0.52437219355600 | 0.88046003680000 | 0.89385949378800 |
| 0.85772260743900 | 0.88045518483900 | 0.22722276197100 |
| 0.85769697609400 | 0.88044366894800 | 0.56054459617400 |
| 0.85769159715600 | 0.88044521841300 | 0.89385706523800 |
| 0.20745211348000 | 0.88347322454300 | 0.16371204228700 |
| 0.21337085653400 | 0.96193955877500 | 0.48836876486900 |

|                  |                  |                  |
|------------------|------------------|------------------|
| 0.21360196512300 | 0.96204662311300 | 0.82186068144500 |
| 0.54698586339700 | 0.96204840845400 | 0.15511588163700 |
| 0.54697198063900 | 0.96203583379600 | 0.48848650295200 |
| 0.54704512276800 | 0.96206977219300 | 0.82181998060100 |
| 0.88074053469400 | 0.96202949254800 | 0.15530600475700 |
| 0.88032289961500 | 0.96204614277400 | 0.48848913635200 |
| 0.88027829125600 | 0.96202750021400 | 0.82178921005500 |
| 0.22364319891000 | 0.91804566348500 | 0.23795747598700 |
| 0.22345668659500 | 0.91981660123900 | 0.57083345306500 |
| 0.22348040067800 | 0.91980136162100 | 0.90412967847700 |
| 0.55678534601200 | 0.91982308066000 | 0.23746744404800 |
| 0.55678141597000 | 0.91985206435900 | 0.57080667048900 |
| 0.55678940124900 | 0.91984142782600 | 0.90411747249900 |
| 0.89016320332800 | 0.91982944317400 | 0.23743327901700 |
| 0.89011265057200 | 0.91982888025900 | 0.57081844082000 |
| 0.89010937776100 | 0.91982407827000 | 0.90415371784200 |
| 0.16505061799600 | 0.88934302950600 | 0.24243642316600 |
| 0.16470021603800 | 0.89558659526900 | 0.58188442698600 |
| 0.16471120100100 | 0.89558880580200 | 0.91516844515800 |
| 0.49799835414300 | 0.89560841178800 | 0.24857530270600 |
| 0.49802652151800 | 0.89561646011700 | 0.58188862252100 |
| 0.49803066758600 | 0.89560806805400 | 0.91519749457700 |
| 0.83137270517000 | 0.89556798117900 | 0.24854927006900 |
| 0.83136126662600 | 0.89560475678500 | 0.58188916660300 |
| 0.83135421483600 | 0.89561470227800 | 0.91521384382300 |
| 0.16571511754900 | 0.91810066625300 | 0.21145979778800 |
| 0.16405042458800 | 0.90260939349500 | 0.54772043228600 |
| 0.16405978317200 | 0.90267835783200 | 0.88103417562200 |
| 0.49734982386700 | 0.90251818235400 | 0.21437531241000 |
| 0.49737707928300 | 0.90262416839600 | 0.54771076337800 |



|                  |                  |                  |
|------------------|------------------|------------------|
| 0.49738672796500 | 0.90263633677700 | 0.88102257633200 |
| 0.83071670976300 | 0.90260806221400 | 0.21439188367300 |
| 0.83071558380400 | 0.90261484299000 | 0.54771696085600 |
| 0.83071447580300 | 0.90262819503400 | 0.88102383168800 |
| 0.17806169061600 | 0.92673292432000 | 0.27423161956800 |
| 0.17780303835500 | 0.93277734728900 | 0.60548324488500 |
| 0.17780841208400 | 0.93280089867900 | 0.93880034309900 |
| 0.51106649445800 | 0.93280252770700 | 0.27215387237300 |
| 0.51113120381600 | 0.93279066174200 | 0.60548309194600 |
| 0.51112979464100 | 0.93278190404300 | 0.93879823119800 |
| 0.84445385787800 | 0.93275145936500 | 0.27217134237900 |
| 0.84446432027900 | 0.93277452879800 | 0.60549020633500 |
| 0.84445614871500 | 0.93275527762500 | 0.93880997358200 |
| 0.14653699620000 | 0.92772956210300 | 0.27169448508600 |
| 0.14569705524500 | 0.93402206549300 | 0.60190736273600 |
| 0.14570180088100 | 0.93401533070500 | 0.93525029326500 |
| 0.47896300107500 | 0.93408487115200 | 0.26849765139100 |
| 0.47902123031100 | 0.93405575161300 | 0.60188761469500 |
| 0.47902270298700 | 0.93402611798100 | 0.93521838398600 |
| 0.81235222255700 | 0.93399359730000 | 0.26857517944400 |
| 0.81235638305400 | 0.93403943213700 | 0.60189699529900 |
| 0.81235272459900 | 0.93405307197500 | 0.93520059738300 |
| 0.23314589651700 | 0.86916417468300 | 0.24164444646800 |
| 0.23414625908600 | 0.87071583339400 | 0.57260826246900 |
| 0.23413123562000 | 0.87068681985800 | 0.90595024071500 |
| 0.56744085116100 | 0.87072400885200 | 0.23937177549700 |
| 0.56745601071200 | 0.87075276761800 | 0.57267561150900 |
| 0.56744578427400 | 0.87074460684500 | 0.90601163160500 |
| 0.90083378503300 | 0.87072751080800 | 0.23928518848900 |
| 0.90080344145200 | 0.87073473211900 | 0.57265256232700 |

|                  |                  |                  |
|------------------|------------------|------------------|
| 0.90078062222400 | 0.87073234251600 | 0.90601311318400 |
| 0.15285021693200 | 0.95480509775900 | 0.18630815585400 |
| 0.14614218909800 | 0.96244509754600 | 0.51544225532100 |
| 0.14607349362500 | 0.96248968315600 | 0.84873598222500 |
| 0.47924680098100 | 0.96238267257200 | 0.18213810997100 |
| 0.47940372903100 | 0.96249302773800 | 0.51543206598100 |
| 0.47939877584300 | 0.96249824814800 | 0.84872492994600 |
| 0.81273608002200 | 0.96247927828000 | 0.18203742604900 |
| 0.81273952112900 | 0.96246998392000 | 0.51543060943800 |
| 0.81274389405500 | 0.96249133722500 | 0.84874500746600 |
| 0.20541997748700 | 0.85949833103700 | 0.16704478196600 |
| 0.17822478009800 | 0.95872791526100 | 0.51688680846800 |
| 0.17817536222300 | 0.95877517383400 | 0.85017637994600 |
| 0.51135941648800 | 0.95880255769600 | 0.18340723395800 |
| 0.51150126013600 | 0.95874544983100 | 0.51686161687100 |
| 0.51149719563200 | 0.95876511250600 | 0.85016282761400 |
| 0.84484276720600 | 0.95865522165500 | 0.18354600555700 |
| 0.84483514033400 | 0.95874520264000 | 0.51685798031600 |
| 0.84484359631300 | 0.95877653049400 | 0.85016809307600 |
| 0.03243261167990 | 0.37979428988700 | 0.22733469145400 |
| 0.03244968070550 | 0.37948165461100 | 0.56025200891900 |
| 0.03244292192010 | 0.37945260623000 | 0.89355623375400 |
| 0.36559099912200 | 0.37943207061100 | 0.22696547005100 |
| 0.36578541658700 | 0.37947210495800 | 0.56023662739200 |
| 0.36579439400500 | 0.37946810132500 | 0.89355776910200 |
| 0.69911356440000 | 0.37950796051900 | 0.22694191415300 |
| 0.69910963731900 | 0.37948234558500 | 0.56025635081700 |
| 0.69911685646400 | 0.37947462469300 | 0.89356996102100 |
| 0.06259420712660 | 0.33996810616100 | 0.24150281670100 |
| 0.06235102394330 | 0.33971161926300 | 0.57443266046800 |

|                  |                  |                  |
|------------------|------------------|------------------|
| 0.06235773525460 | 0.33973095786300 | 0.90777384921100 |
| 0.39562636888900 | 0.33974423423100 | 0.24118463120900 |
| 0.39566384741600 | 0.33971212499600 | 0.57444992420800 |
| 0.39567298192900 | 0.33972555409400 | 0.90776930697500 |
| 0.72901690937700 | 0.33972937909900 | 0.24109589523000 |
| 0.72900941260500 | 0.33969949920500 | 0.57442638507600 |
| 0.72901905716400 | 0.33969807301400 | 0.90773771084500 |
| 0.00312265210848 | 0.36761998009800 | 0.24474414522000 |
| 0.00311906145101 | 0.36739855348100 | 0.57766940548600 |
| 0.00310837428900 | 0.36735738024500 | 0.91097563745900 |
| 0.33613939449400 | 0.36707749604300 | 0.24449478886200 |
| 0.33646006526300 | 0.36738773396500 | 0.57765341922900 |
| 0.33647201880900 | 0.36740249810700 | 0.91095976330200 |
| 0.66978011930700 | 0.36739391055500 | 0.24437551083200 |
| 0.66978025350800 | 0.36737262603500 | 0.57769111178900 |
| 0.66978529810000 | 0.36736611862200 | 0.91100282812100 |
| 0.00680034177242 | 0.35713299403500 | 0.21182431320400 |
| 0.00689160579414 | 0.35669724945300 | 0.54477063225000 |
| 0.00689252083410 | 0.35664443636700 | 0.87806988750400 |
| 0.33991470532100 | 0.35723819480300 | 0.21139662489700 |
| 0.34023045078700 | 0.35666915789400 | 0.54475661290600 |
| 0.34024208344600 | 0.35664526721700 | 0.87807235079000 |
| 0.67355669718900 | 0.35673440488700 | 0.21145765016700 |
| 0.67355583618800 | 0.35670056820100 | 0.54477629886300 |
| 0.67356231515500 | 0.35668268269000 | 0.87808625346100 |
| 0.01231510343320 | 0.33037530534400 | 0.27064096872300 |
| 0.01221693839310 | 0.33045796324000 | 0.60371579061300 |
| 0.01219967372210 | 0.33041801626400 | 0.93700773985800 |
| 0.34507726070800 | 0.32972115057000 | 0.27018893080400 |
| 0.34556631521200 | 0.33046161590500 | 0.60370828765900 |

|                  |                  |                  |
|------------------|------------------|------------------|
| 0.34558770966800 | 0.33046550745100 | 0.93701413333200 |
| 0.67888481222300 | 0.33045973090800 | 0.27039559329900 |
| 0.67889001651400 | 0.33044554004500 | 0.60371348428900 |
| 0.67889229463500 | 0.33044130317700 | 0.93702443622900 |
| 0.31339065562800 | 0.33109488734100 | 0.26482541098400 |
| 0.31389224107600 | 0.33179460357700 | 0.59862728445900 |
| 0.31391152829300 | 0.33183030038900 | 0.93196493071900 |
| 0.64721051989100 | 0.33177805961100 | 0.26529479290200 |
| 0.64721467432800 | 0.33176501866900 | 0.59862043299400 |
| 0.64721862800200 | 0.33176520687300 | 0.93193412902000 |
| 0.98064075182000 | 0.33182718959700 | 0.26564931697400 |
| 0.98054505502400 | 0.33180421031500 | 0.59863074272800 |
| 0.98052563198700 | 0.33175885651300 | 0.93191688161800 |
| 0.07438780697290 | 0.38853548861000 | 0.24344593065100 |
| 0.07256859091770 | 0.38856387895400 | 0.57895561525800 |
| 0.07255654276510 | 0.38858095620400 | 0.91229697246900 |
| 0.40574893761700 | 0.38858940966500 | 0.24575759384100 |
| 0.40588307712000 | 0.38856060143900 | 0.57898155139600 |
| 0.40587116432100 | 0.38858067467000 | 0.91230183682300 |
| 0.73924153955200 | 0.38856765526300 | 0.24565125044500 |
| 0.73922404786200 | 0.38854136016000 | 0.57899787397200 |
| 0.73920371411200 | 0.38853565881000 | 0.91234312815100 |
| 0.31719504677100 | 0.30115323573200 | 0.18305330499500 |
| 0.31804253397600 | 0.30102810680100 | 0.51632621214400 |
| 0.31803608916900 | 0.30101266031300 | 0.84965121730900 |
| 0.65136365334900 | 0.30105417918200 | 0.18298394689300 |
| 0.65136103388800 | 0.30102484040600 | 0.51632572387900 |
| 0.65136219225200 | 0.30101470030800 | 0.84963777035400 |
| 0.98511389824200 | 0.30069759554800 | 0.18272303441900 |
| 0.98469213675800 | 0.30105242217000 | 0.51633773009600 |

|                  |                  |                  |
|------------------|------------------|------------------|
| 0.98469473463200 | 0.30100138983800 | 0.84961593495900 |
| 0.01717385046290 | 0.29745138234000 | 0.18250213985900 |
| 0.01673402032630 | 0.29708944804600 | 0.51533715550700 |
| 0.01673833909240 | 0.29702792597600 | 0.84865479634400 |
| 0.34924031967300 | 0.29708800123100 | 0.18168015976700 |
| 0.35008235501400 | 0.29704968017600 | 0.51534063426700 |
| 0.35007935701700 | 0.29703387511900 | 0.84862735428300 |
| 0.68340829457800 | 0.29708830375400 | 0.18199392962600 |
| 0.68340350756900 | 0.29706626136300 | 0.51534509284100 |
| 0.68340428421800 | 0.29705331108300 | 0.84865223388300 |
| 0.03243849017820 | 0.88213031555900 | 0.22578879262800 |
| 0.03234849405240 | 0.88273649525800 | 0.55887319087800 |
| 0.03233479292170 | 0.88279030299700 | 0.89219515818700 |
| 0.36554641637300 | 0.88295714486800 | 0.22563634756100 |
| 0.36568271342100 | 0.88275129624300 | 0.55886255300500 |
| 0.36568624424300 | 0.88274159737000 | 0.89218771614100 |
| 0.69902184353800 | 0.88269870633400 | 0.22555250980300 |
| 0.69900861237000 | 0.88274444148000 | 0.55887750139000 |
| 0.69901300575300 | 0.88274686432200 | 0.89220103524700 |
| 0.06281728544000 | 0.92153389732800 | 0.23999083068700 |
| 0.06260542330070 | 0.92181381532700 | 0.57289463833000 |
| 0.06261103619210 | 0.92180869943300 | 0.90623758531100 |
| 0.39589952648700 | 0.92186268556700 | 0.23967406616800 |
| 0.39591931624400 | 0.92181578716200 | 0.57291361911100 |
| 0.39592739423700 | 0.92178770405800 | 0.90622817941300 |
| 0.72927466518300 | 0.92178143629600 | 0.23955578095100 |
| 0.72926401312700 | 0.92182795472100 | 0.57288954620500 |
| 0.72927295759600 | 0.92182335225500 | 0.90620103842100 |
| 0.00350506478799 | 0.89387532408200 | 0.24368321065500 |
| 0.00341004929686 | 0.89430907592200 | 0.57683043803400 |

|                  |                  |                  |
|------------------|------------------|------------------|
| 0.00339236131176 | 0.89436914313500 | 0.91015683285500 |
| 0.33641813982800 | 0.89458301942600 | 0.24364054178700 |
| 0.33675179356400 | 0.89432884430200 | 0.57682268686700 |
| 0.33676257962900 | 0.89431504167200 | 0.91013846099600 |
| 0.67007764012000 | 0.89429652516000 | 0.24351763550800 |
| 0.67007271812900 | 0.89434108315400 | 0.57684997777600 |
| 0.67007513439900 | 0.89434233062900 | 0.91017253658300 |
| 0.00655998940878 | 0.90525054723600 | 0.21088753272700 |
| 0.00652891403461 | 0.90619251959300 | 0.54405084301900 |
| 0.00651974652626 | 0.90626799326700 | 0.87736992036400 |
| 0.33957384175500 | 0.90582730692000 | 0.21071107993700 |
| 0.33986586278200 | 0.90622495234900 | 0.54404365609200 |
| 0.33987326630600 | 0.90623822601000 | 0.87736459183500 |
| 0.67320567284400 | 0.90615148711700 | 0.21072479518900 |
| 0.67319381861100 | 0.90620422514300 | 0.54405640286200 |
| 0.67319688554500 | 0.90621608491000 | 0.87737613405800 |
| 0.01304756598000 | 0.93089963573800 | 0.26978986990300 |
| 0.01280181886970 | 0.93071706957700 | 0.60327187370400 |
| 0.01277222591820 | 0.93076600304200 | 0.93659351668000 |
| 0.34549391444900 | 0.93124956360600 | 0.26993330795800 |
| 0.34615371726300 | 0.93072588048500 | 0.60326960632100 |
| 0.34618073750100 | 0.93072795553200 | 0.93657695098700 |
| 0.67946898735700 | 0.93069519179500 | 0.26994237501400 |
| 0.67947400922400 | 0.93073244673100 | 0.60327501834600 |
| 0.67947310034100 | 0.93072923026100 | 0.93659751098300 |
| 0.31377933082900 | 0.92969511055300 | 0.26489540800300 |
| 0.31441112532000 | 0.92908790237900 | 0.59866258063500 |
| 0.31443568524700 | 0.92905179038000 | 0.93200621312100 |
| 0.64772717907400 | 0.92907739428100 | 0.26531095825300 |
| 0.64773018268300 | 0.92911248615200 | 0.59865295870700 |

|                  |                  |                  |
|------------------|------------------|------------------|
| 0.64773223152100 | 0.92910695129300 | 0.93197607548100 |
| 0.98126721371800 | 0.92905489673500 | 0.26536093865800 |
| 0.98106137742700 | 0.92907159841100 | 0.59865984155600 |
| 0.98103172854500 | 0.92913483340800 | 0.93196700570600 |
| 0.07469304636110 | 0.87296690895900 | 0.24114445620300 |
| 0.07286909334810 | 0.87283349881500 | 0.57660348281000 |
| 0.07285600590950 | 0.87282885221200 | 0.90994301650700 |
| 0.40606139263600 | 0.87286609440100 | 0.24340387312700 |
| 0.40618418124400 | 0.87283948844100 | 0.57663002597900 |
| 0.40617071941900 | 0.87280637689900 | 0.90995344555300 |
| 0.73954278141700 | 0.87281573089400 | 0.24330886355900 |
| 0.73952238251000 | 0.87285547420800 | 0.57664814859900 |
| 0.73950199180100 | 0.87285477070300 | 0.90999883916300 |
| 0.31700491994800 | 0.95998591132100 | 0.18285320369300 |
| 0.31785261609700 | 0.96019297153600 | 0.51611698267700 |
| 0.31784644055900 | 0.96020872826000 | 0.84944358519900 |
| 0.65117469751400 | 0.96015839414000 | 0.18277555759100 |
| 0.65117148876900 | 0.96019376404800 | 0.51611701857600 |
| 0.65117252573600 | 0.96019976932900 | 0.84942985466700 |
| 0.98493918682900 | 0.96047769829700 | 0.18252453106100 |
| 0.98450215672400 | 0.96016740219400 | 0.51612795650900 |
| 0.98450403834600 | 0.96022383581100 | 0.84940978953300 |
| 0.01702076489690 | 0.96366706888500 | 0.18229366637800 |
| 0.01657859505640 | 0.96404731307800 | 0.51511535374000 |
| 0.01658290744050 | 0.96411154735500 | 0.84843641204800 |
| 0.34908112944300 | 0.96398717476600 | 0.18146665283300 |
| 0.34992741509400 | 0.96408799730900 | 0.51512044931800 |
| 0.34992432127100 | 0.96410286112200 | 0.84840979661000 |
| 0.68325358070700 | 0.96404700505200 | 0.18177174208400 |
| 0.68324862150600 | 0.96407217222700 | 0.51512363188300 |

|                  |                  |                  |
|------------------|------------------|------------------|
| 0.68324930923400 | 0.96407989369500 | 0.84843198252000 |
| 0.22375011553400 | 0.37273819246100 | 0.22941467796700 |
| 0.22211800313300 | 0.37072053978600 | 0.56255388310500 |
| 0.22211990794300 | 0.37074071850500 | 0.89587748374500 |
| 0.55545867376600 | 0.37075686180500 | 0.22922055469400 |
| 0.55545118549900 | 0.37071467339000 | 0.56255182544400 |
| 0.55545701135300 | 0.37073719038900 | 0.89587763206600 |
| 0.88879294452400 | 0.37073561061700 | 0.22920247237300 |
| 0.88878399465000 | 0.37073027032200 | 0.56255304952200 |
| 0.88879023942900 | 0.37073526965000 | 0.89588806230300 |
| 0.16950839792700 | 0.37809875309500 | 0.22386207301300 |
| 0.16957209825200 | 0.37997754701200 | 0.56120143555800 |
| 0.16958687510700 | 0.37992780564700 | 0.89451489589200 |
| 0.50288775659700 | 0.38000225128500 | 0.22789019114400 |
| 0.50289686489400 | 0.37995538570600 | 0.56120239320200 |
| 0.50290257027400 | 0.37994232348900 | 0.89451574148800 |
| 0.83625287441200 | 0.37997906424000 | 0.22787729325500 |
| 0.83622859739300 | 0.37995870958200 | 0.56120039959200 |
| 0.83622342075700 | 0.37994970991600 | 0.89452102745800 |
| 0.16208115304200 | 0.35366369229800 | 0.27253040193600 |
| 0.16175741729900 | 0.34773143315400 | 0.60394175615800 |
| 0.16177886170600 | 0.34771370094900 | 0.93726911927200 |
| 0.49500497548600 | 0.34768033062600 | 0.27059877656500 |
| 0.49507654837500 | 0.34770086228300 | 0.60393932490300 |
| 0.49508671109500 | 0.34771867366400 | 0.93726264249800 |
| 0.82840623863300 | 0.34775572146000 | 0.27061575421000 |
| 0.82841095358500 | 0.34771507334900 | 0.60394259813900 |
| 0.82840479419500 | 0.34771577865700 | 0.93726459970800 |
| 0.16383613788900 | 0.30785100689200 | 0.20244051912400 |
| 0.16179169427300 | 0.30441565758300 | 0.52828927880100 |



|                  |                  |                  |
|------------------|------------------|------------------|
| 0.16175881410500 | 0.30439342480300 | 0.86158954672100 |
| 0.49500587476900 | 0.30442168770900 | 0.19488898023500 |
| 0.49509251880800 | 0.30439653798200 | 0.52828008062900 |
| 0.49508049842300 | 0.30439326098100 | 0.86157508884800 |
| 0.82839057004800 | 0.30443686288200 | 0.19492932865800 |
| 0.82842586875500 | 0.30440874792700 | 0.52827065697800 |
| 0.82843290433600 | 0.30439598086400 | 0.86159219616800 |
| 0.22404278429400 | 0.88858416406800 | 0.22936636355700 |
| 0.22220227901800 | 0.89014236809500 | 0.56254897114400 |
| 0.22220215141800 | 0.89012541574600 | 0.89587255745900 |
| 0.55555686967100 | 0.89011155369600 | 0.22921854304700 |
| 0.55554064440400 | 0.89014700548500 | 0.56254807781900 |
| 0.55554587009600 | 0.89012975376800 | 0.89587320721800 |
| 0.88887994527600 | 0.89013329099100 | 0.22919785453500 |
| 0.88887233530900 | 0.89013379015200 | 0.56254868021800 |
| 0.88888257223600 | 0.89012841100800 | 0.89588452886600 |
| 0.16986436516400 | 0.88299248821900 | 0.22354999955400 |
| 0.16975085952500 | 0.88068399460000 | 0.56099342451800 |
| 0.16976409984000 | 0.88073475434900 | 0.89430824063200 |
| 0.50307912584600 | 0.88065782993100 | 0.22766980907900 |
| 0.50308057106900 | 0.88070472248800 | 0.56098720699900 |
| 0.50308629714500 | 0.88071510810600 | 0.89429908091300 |
| 0.83643364796400 | 0.88068449417000 | 0.22767000575900 |
| 0.83641158549600 | 0.88070233923100 | 0.56098639206100 |
| 0.83640994816000 | 0.88070609598500 | 0.89430041490400 |
| 0.16213604960900 | 0.90693796028000 | 0.27235620648500 |
| 0.16167827213500 | 0.91241308327700 | 0.60384748869500 |
| 0.16169433305000 | 0.91242801224400 | 0.93717704653800 |
| 0.49493939664800 | 0.91246080504000 | 0.27049142193100 |
| 0.49499813512300 | 0.91243579461100 | 0.60383839066900 |

|                  |                  |                  |
|------------------|------------------|------------------|
| 0.49500560336600 | 0.91241741877000 | 0.93715854997900 |
| 0.82833486850700 | 0.91239382055500 | 0.27052255118200 |
| 0.82833387444300 | 0.91242360625000 | 0.60384324487700 |
| 0.82832589091400 | 0.91241842943600 | 0.93715622415900 |
| 0.16406136301200 | 0.95333148646100 | 0.20235814869600 |
| 0.16188869275400 | 0.95625469155800 | 0.52824334768000 |
| 0.16185143438100 | 0.95627476034900 | 0.86154551361900 |
| 0.49509871224200 | 0.95625456987100 | 0.19484234245700 |
| 0.49518686786300 | 0.95627250113700 | 0.52823249867100 |
| 0.49517508282800 | 0.95627852292500 | 0.86152767889500 |
| 0.82848586804600 | 0.95623963575600 | 0.19488399016400 |
| 0.82852150562800 | 0.95626198827600 | 0.52822362807500 |
| 0.82852883265500 | 0.95627397339700 | 0.86154402706000 |
| 0.06236032660080 | 0.36956086732900 | 0.23319766376600 |
| 0.06267860984020 | 0.36986173294500 | 0.56667550660600 |
| 0.06269214418160 | 0.36985986761700 | 0.90001008383900 |
| 0.39603082623700 | 0.36984699173300 | 0.23338970507700 |
| 0.39601548992600 | 0.36985744584900 | 0.56668282887300 |
| 0.39600699163700 | 0.36986843794100 | 0.90000987088600 |
| 0.72935432781600 | 0.36988997311600 | 0.23334880165900 |
| 0.72935113766700 | 0.36986680650000 | 0.56667912121100 |
| 0.72936204809300 | 0.36987658552800 | 0.90000698389400 |
| 0.01111409917090 | 0.38021517366700 | 0.22503990418000 |
| 0.01121281062350 | 0.37987271576200 | 0.55789152634800 |
| 0.01121383647830 | 0.37983067955500 | 0.89119267153900 |
| 0.34439629362300 | 0.38000195664400 | 0.22469422571500 |
| 0.34455238224000 | 0.37985554723000 | 0.55787559284400 |
| 0.34455982968200 | 0.37984970290900 | 0.89118644145800 |
| 0.67788012995300 | 0.37989558022600 | 0.22459112156800 |
| 0.67787648292800 | 0.37986627550800 | 0.55789968313900 |

|                  |                  |                  |
|------------------|------------------|------------------|
| 0.67788009561100 | 0.37985559445700 | 0.89120973191200 |
| 0.32995262987400 | 0.35128720768700 | 0.26685021782300 |
| 0.33041338967800 | 0.35202090039800 | 0.60038979968400 |
| 0.33044030718700 | 0.35203956828000 | 0.93371257121600 |
| 0.66373129818300 | 0.35201204765000 | 0.26708029286900 |
| 0.66373418096300 | 0.35200112993000 | 0.60039704060300 |
| 0.66374115788400 | 0.35199898607200 | 0.93370805247900 |
| 0.99714209464300 | 0.35198054822900 | 0.26752477645100 |
| 0.99706890832500 | 0.35202371470900 | 0.60039926684300 |
| 0.99705414600100 | 0.35198360636500 | 0.93369263897800 |
| 0.00138832169088 | 0.30419396446300 | 0.19463665090500 |
| 0.00122676606451 | 0.30418234952900 | 0.52794374766100 |
| 0.00121799685559 | 0.30414856536400 | 0.86124639176400 |
| 0.33387130347900 | 0.30409145351200 | 0.19444455719900 |
| 0.33456397915100 | 0.30416301013900 | 0.52794091266500 |
| 0.33457006988400 | 0.30415221044600 | 0.86124667486800 |
| 0.66788441595900 | 0.30418295110600 | 0.19458912019200 |
| 0.66788389910700 | 0.30417130200100 | 0.52794008008200 |
| 0.66788624479400 | 0.30416456319000 | 0.86124793581100 |
| 0.06252480870640 | 0.89242228733200 | 0.23123595943400 |
| 0.06280759681600 | 0.89201343148800 | 0.56471086325000 |
| 0.06281504303650 | 0.89203056464700 | 0.89804668087900 |
| 0.39618100759900 | 0.89212948965900 | 0.23142687465900 |
| 0.39614611546900 | 0.89202102378100 | 0.56471864307500 |
| 0.39613329347200 | 0.89199210818000 | 0.89804616759300 |
| 0.72948880769200 | 0.89196718884400 | 0.23138620548300 |
| 0.72948044445400 | 0.89200827300100 | 0.56471541216600 |
| 0.72948787076400 | 0.89198996330900 | 0.89804728017500 |
| 0.01111829283670 | 0.88176285724400 | 0.22381437364200 |
| 0.01108186692890 | 0.88259500676900 | 0.55691811110100 |

|                  |                  |                  |
|------------------|------------------|------------------|
| 0.01107325299770 | 0.88266793387700 | 0.89024233496000 |
| 0.34431090870500 | 0.88262609416300 | 0.22374385502400 |
| 0.34441890142700 | 0.88262059465700 | 0.55690962594300 |
| 0.34442050528300 | 0.88261979785000 | 0.89022737043000 |
| 0.67775833589600 | 0.88256438012400 | 0.22359879187100 |
| 0.67774583716800 | 0.88261412268700 | 0.55692596219200 |
| 0.67774603365000 | 0.88262256414900 | 0.89024756764900 |
| 0.33039009669900 | 0.90965174647900 | 0.26658453012900 |
| 0.33101872112400 | 0.90907367537900 | 0.60002131080100 |
| 0.33105255430800 | 0.90905738686000 | 0.93335061866900 |
| 0.66433416581100 | 0.90905255385000 | 0.26668829276300 |
| 0.66433563105700 | 0.90908626207100 | 0.60002301853600 |
| 0.66433982329900 | 0.90908100472400 | 0.93334728874400 |
| 0.99790086448800 | 0.90916417082000 | 0.26673457900100 |
| 0.99767157316200 | 0.90906064489500 | 0.60002273333200 |
| 0.99764325069000 | 0.90911426316400 | 0.93334510923200 |
| 0.00123389705822 | 0.95687205833200 | 0.19442842870800 |
| 0.00105685825301 | 0.95695133232000 | 0.52772901749500 |
| 0.00104839711669 | 0.95698966861300 | 0.86103549598600 |
| 0.33370173269200 | 0.95695457994500 | 0.19423783705500 |
| 0.33439422197800 | 0.95697274933400 | 0.52772760967400 |
| 0.33439909769400 | 0.95698175669900 | 0.86103486026500 |
| 0.66771592600500 | 0.95694342164200 | 0.19437441954400 |
| 0.66771494085500 | 0.95696265654000 | 0.52772593530100 |
| 0.66771623098000 | 0.95696505762500 | 0.86103472331000 |
